# Supplementary material for: Single cell functional genomics reveals the importance of mitochondria in cell-to-cell phenotypic variation
Source: eLife journal article supplement (doi:10.7554/elife.38904), 2019-01-14

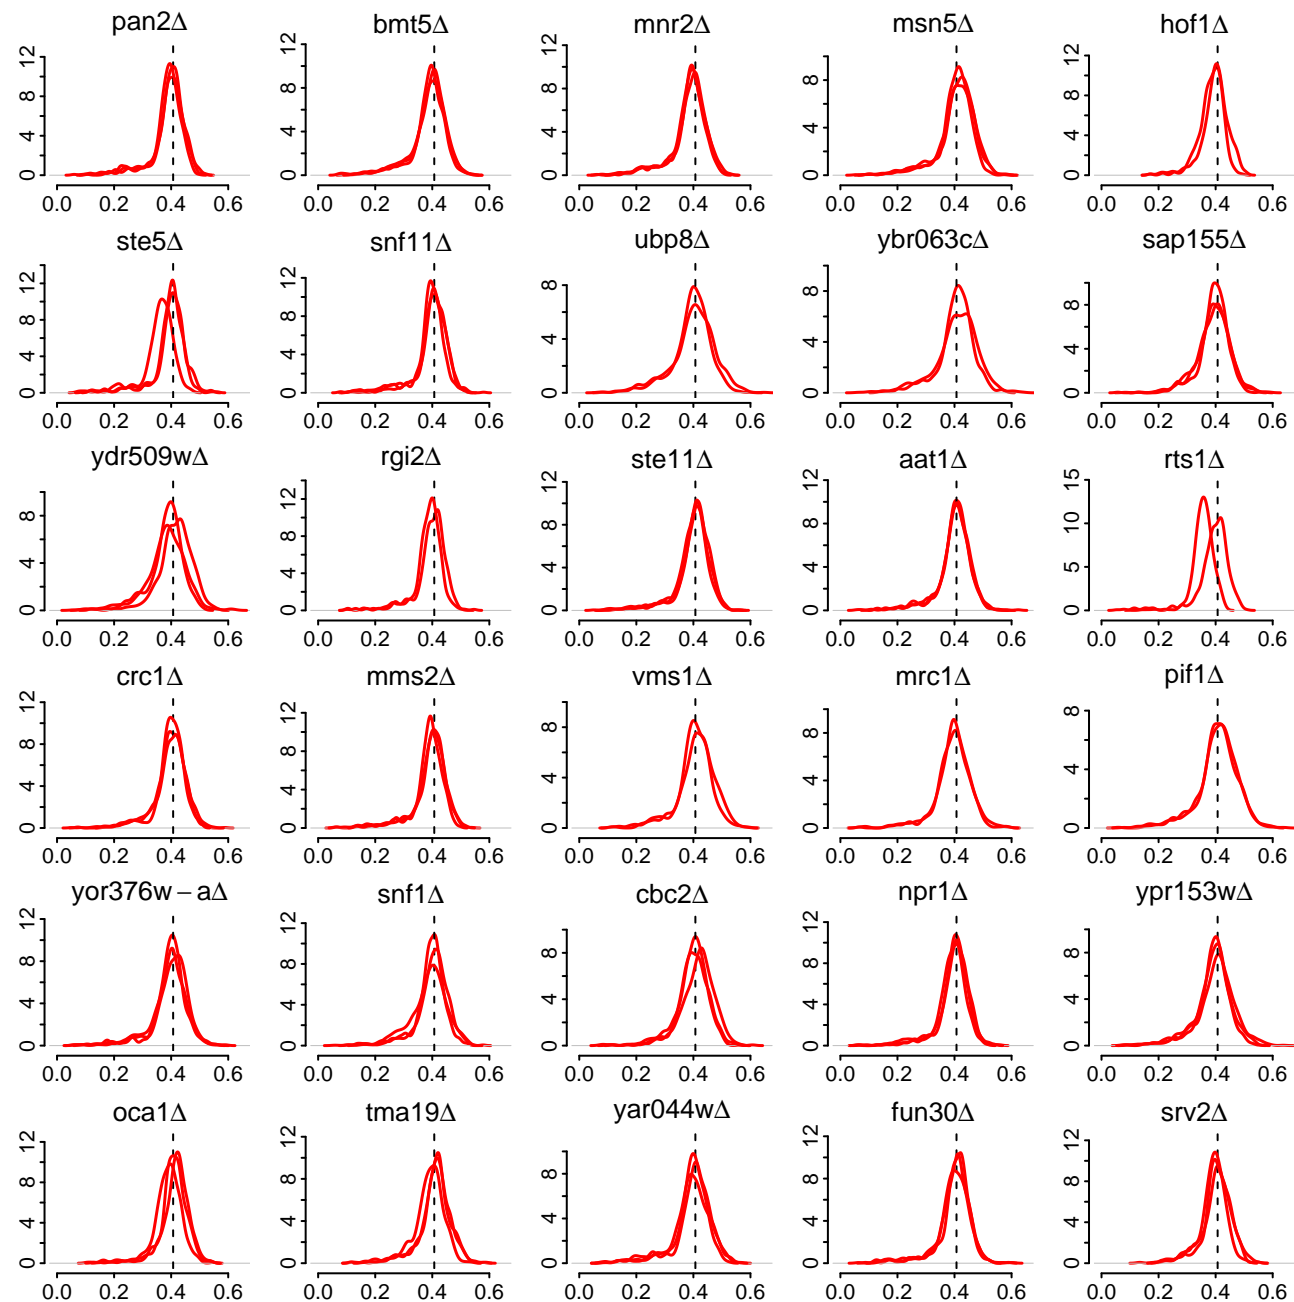

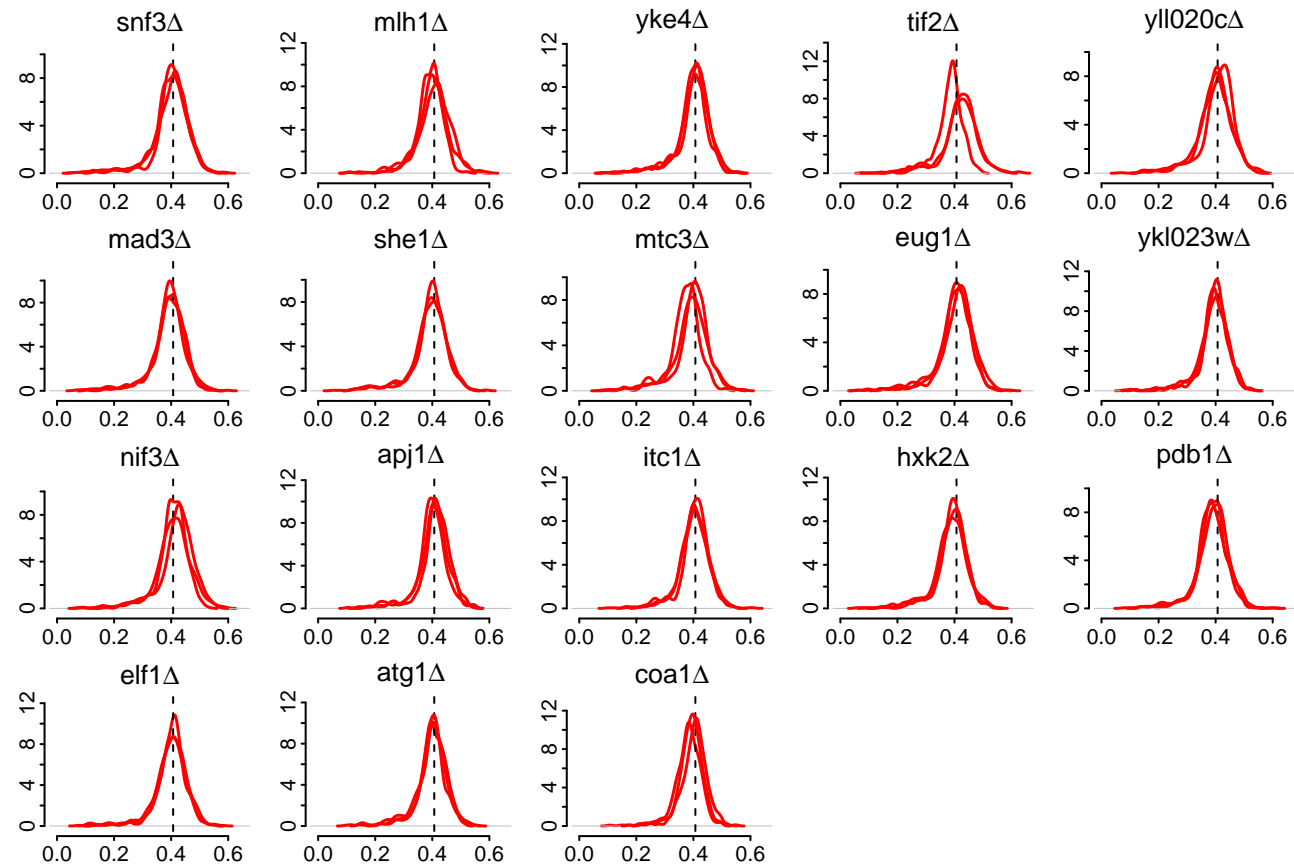

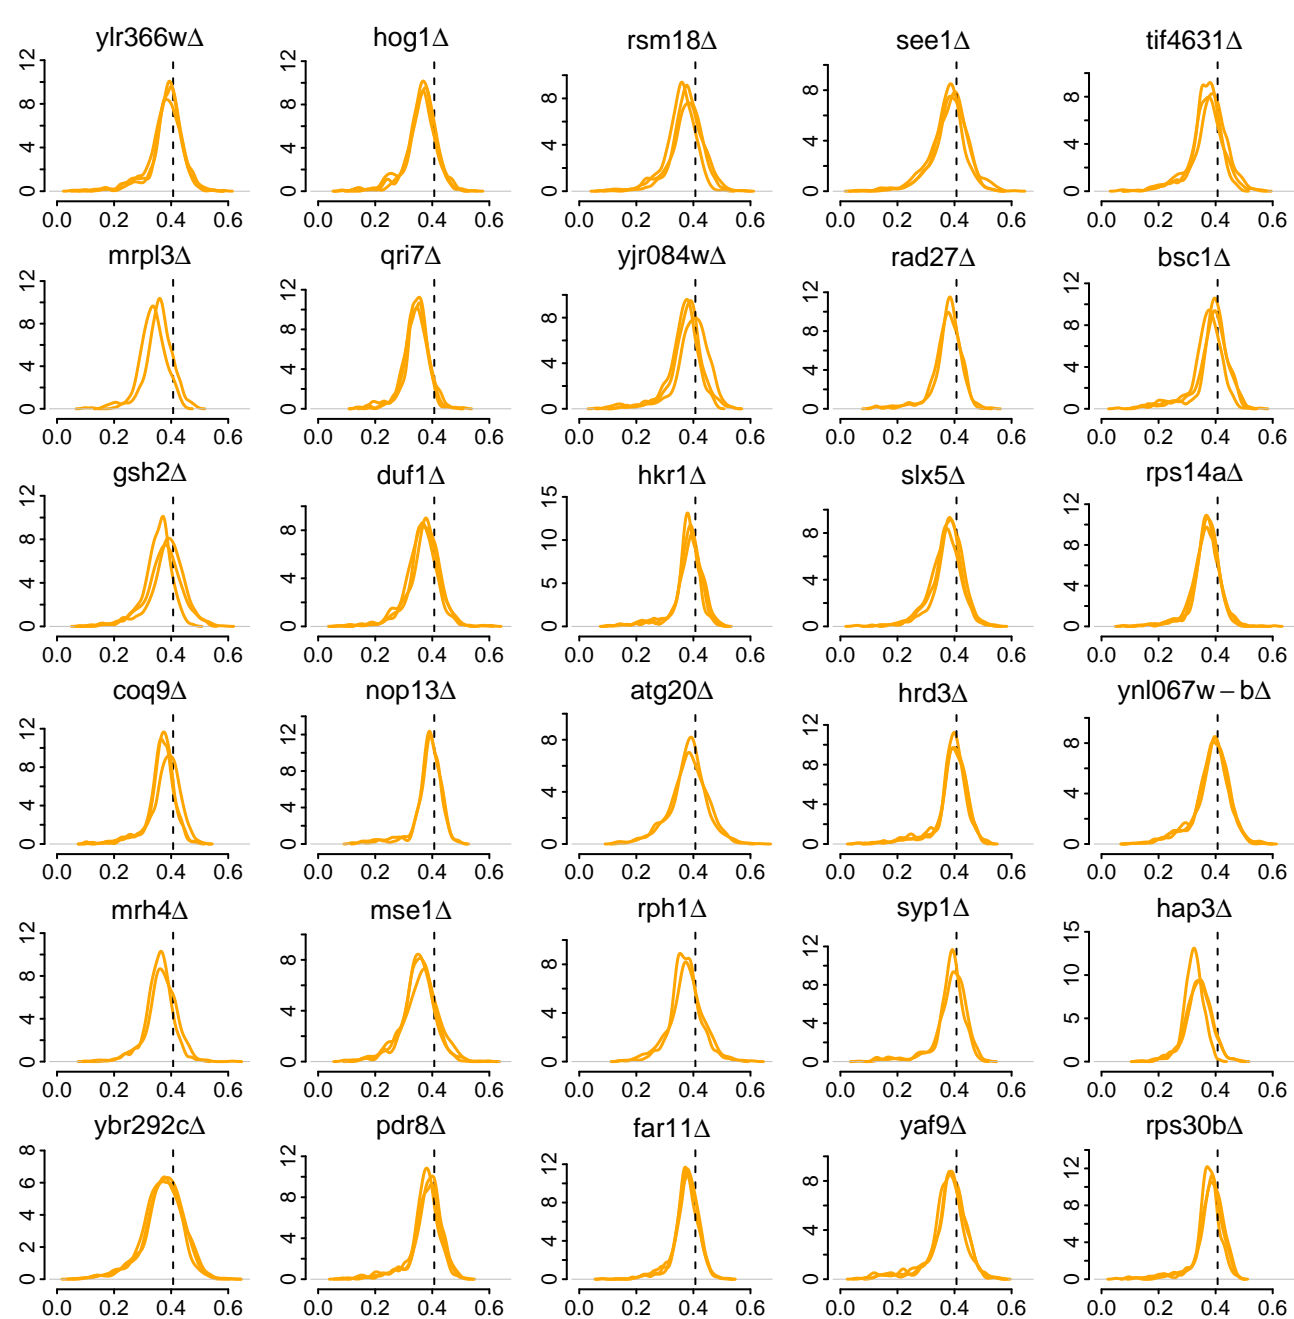

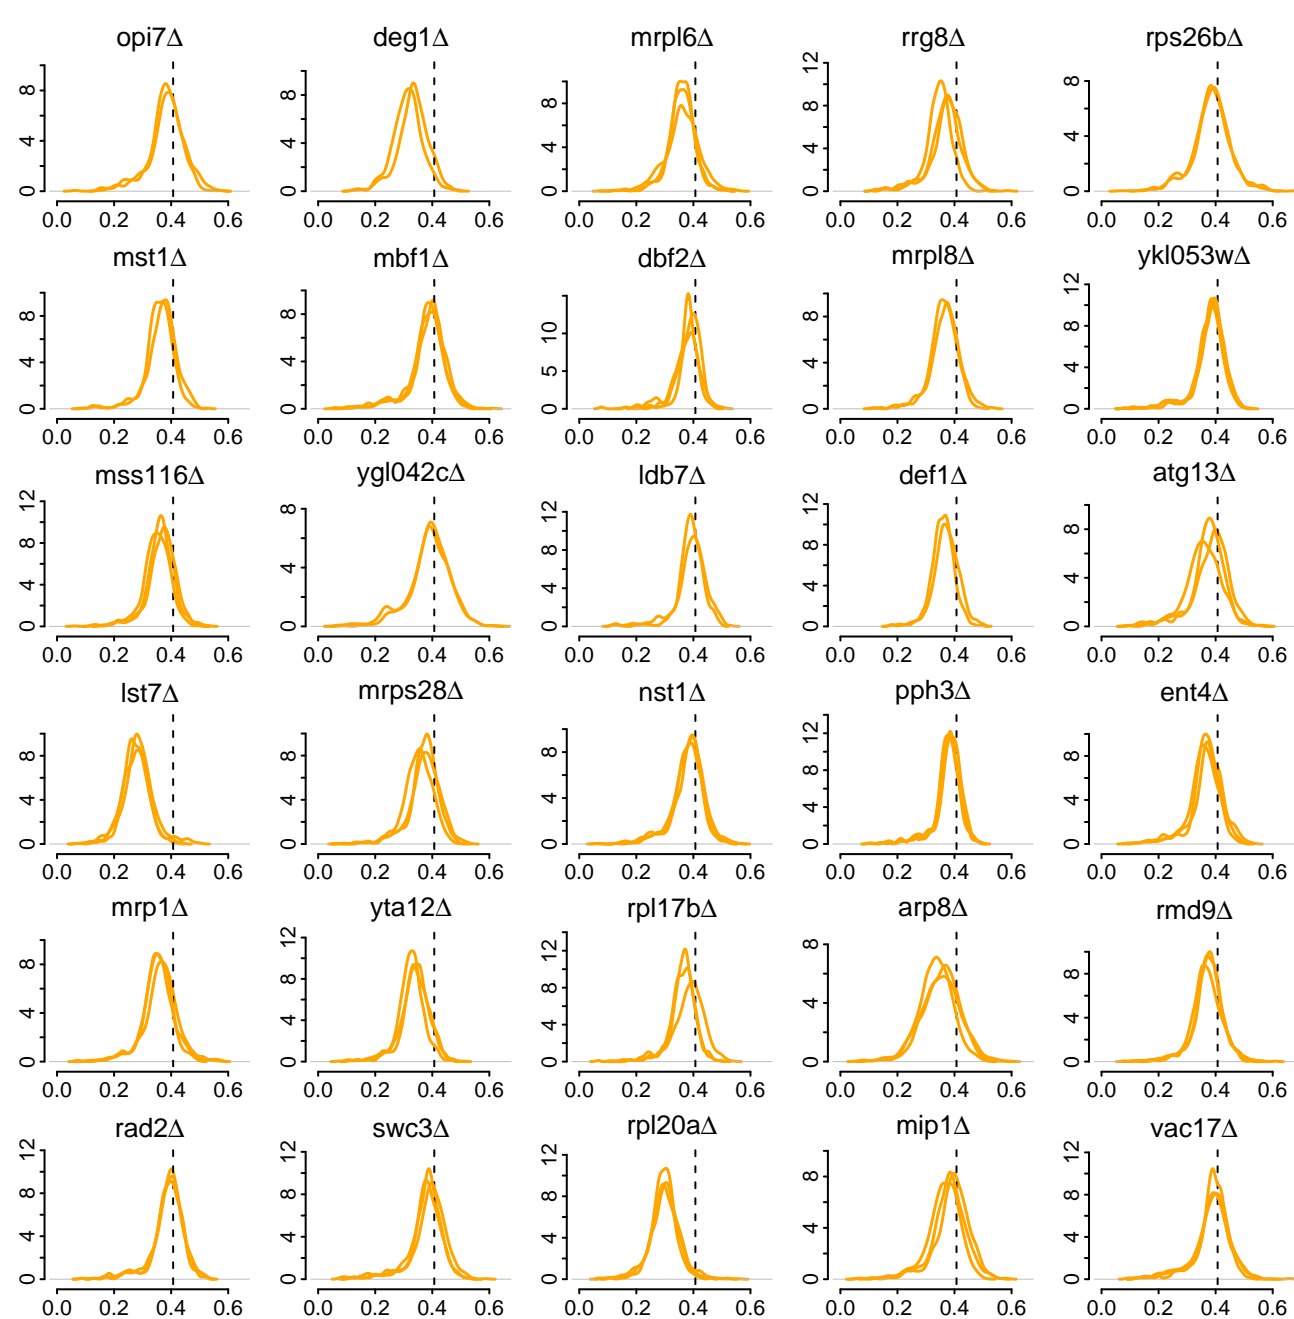

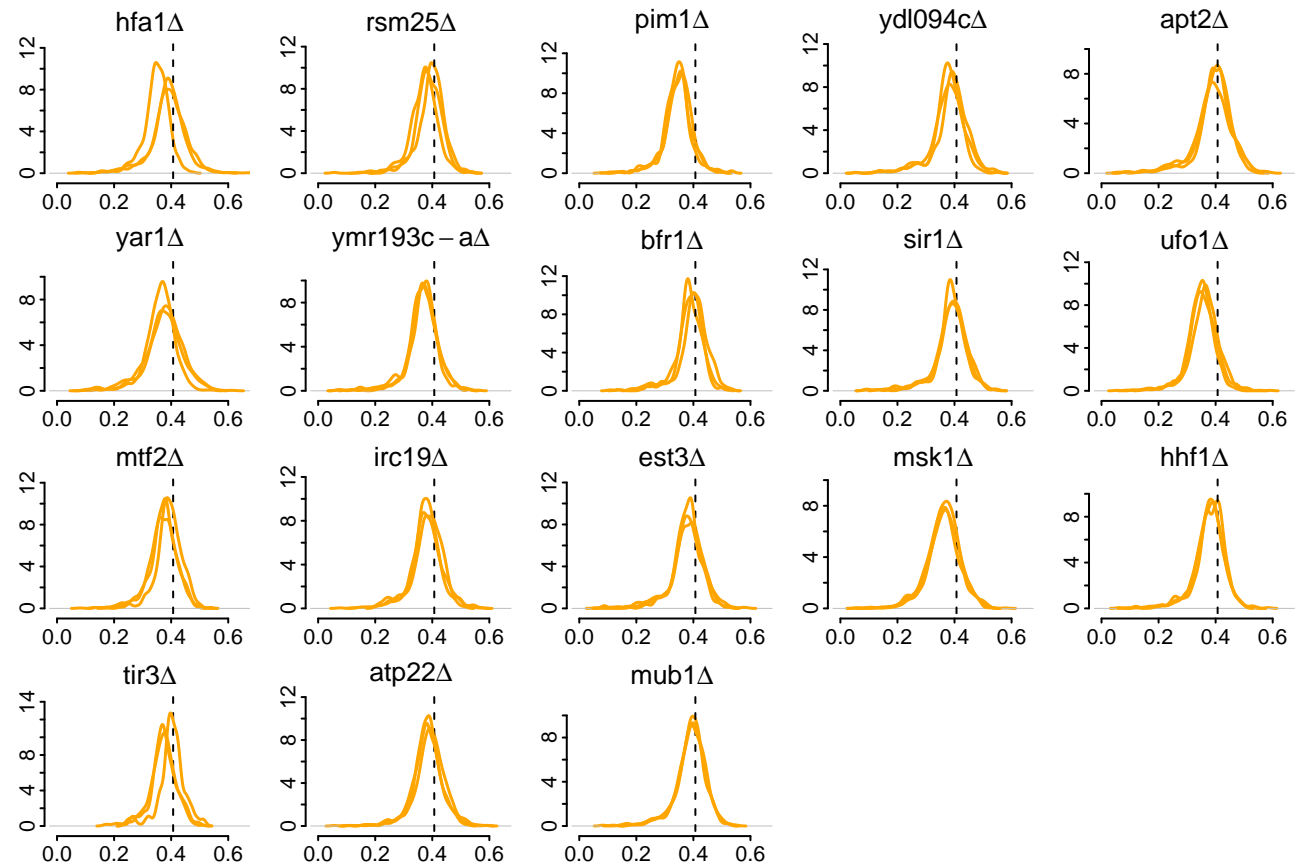

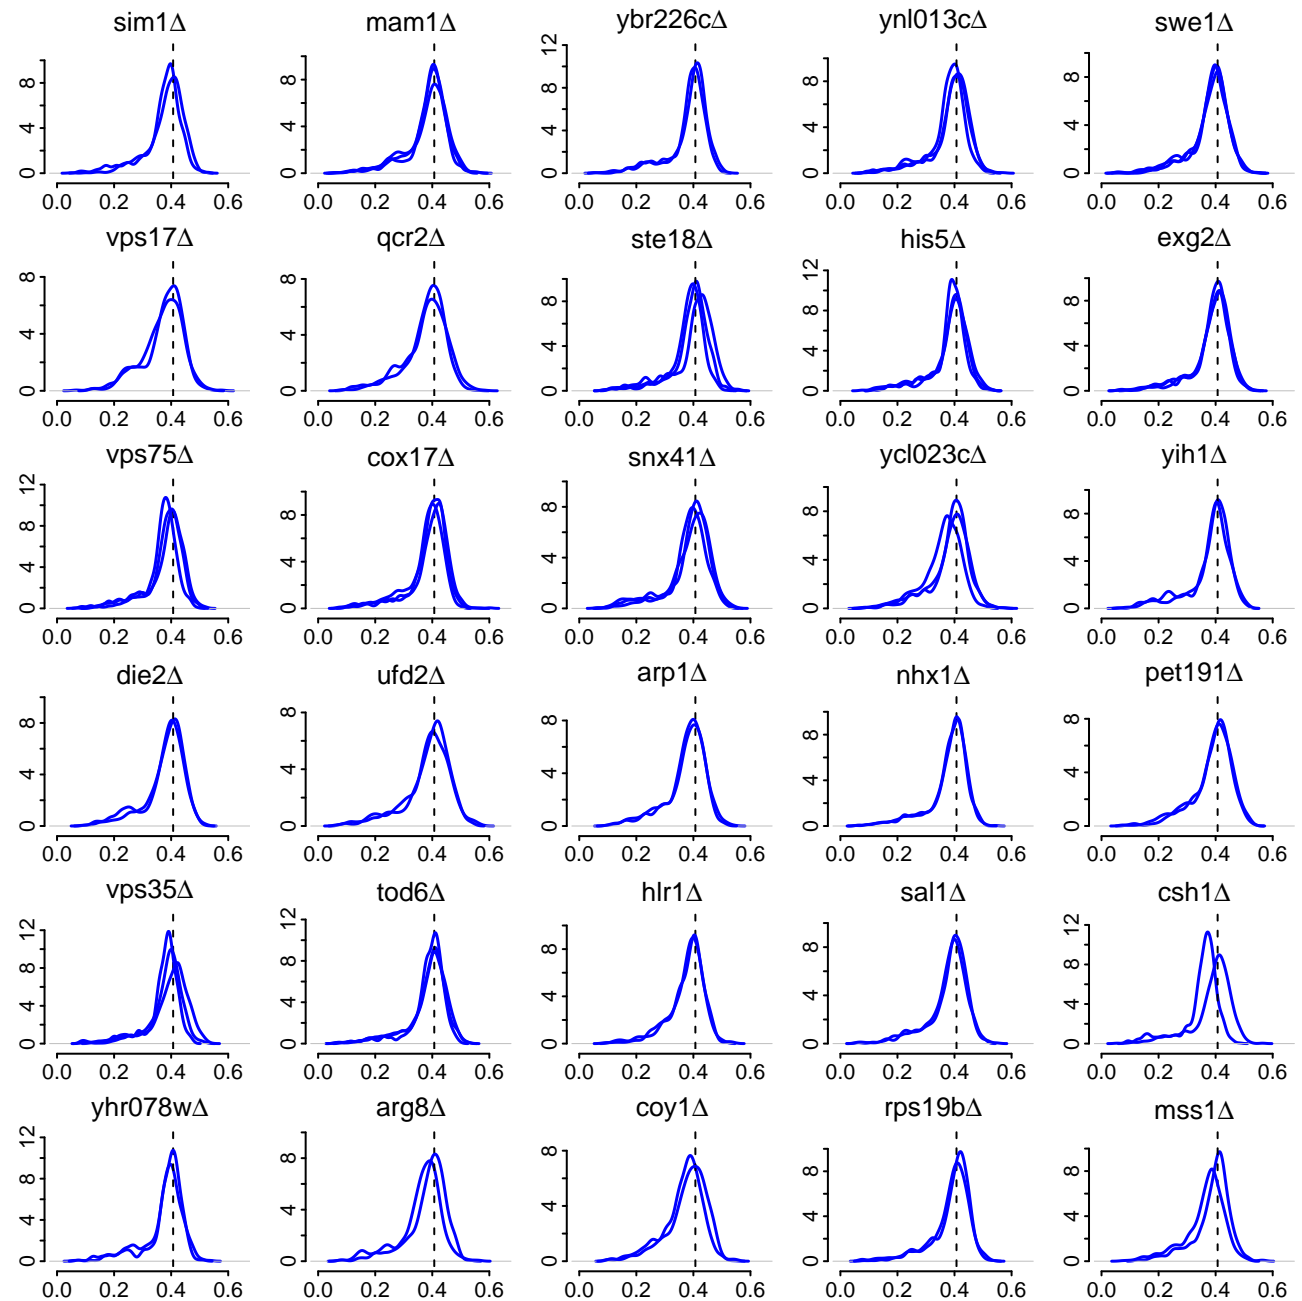

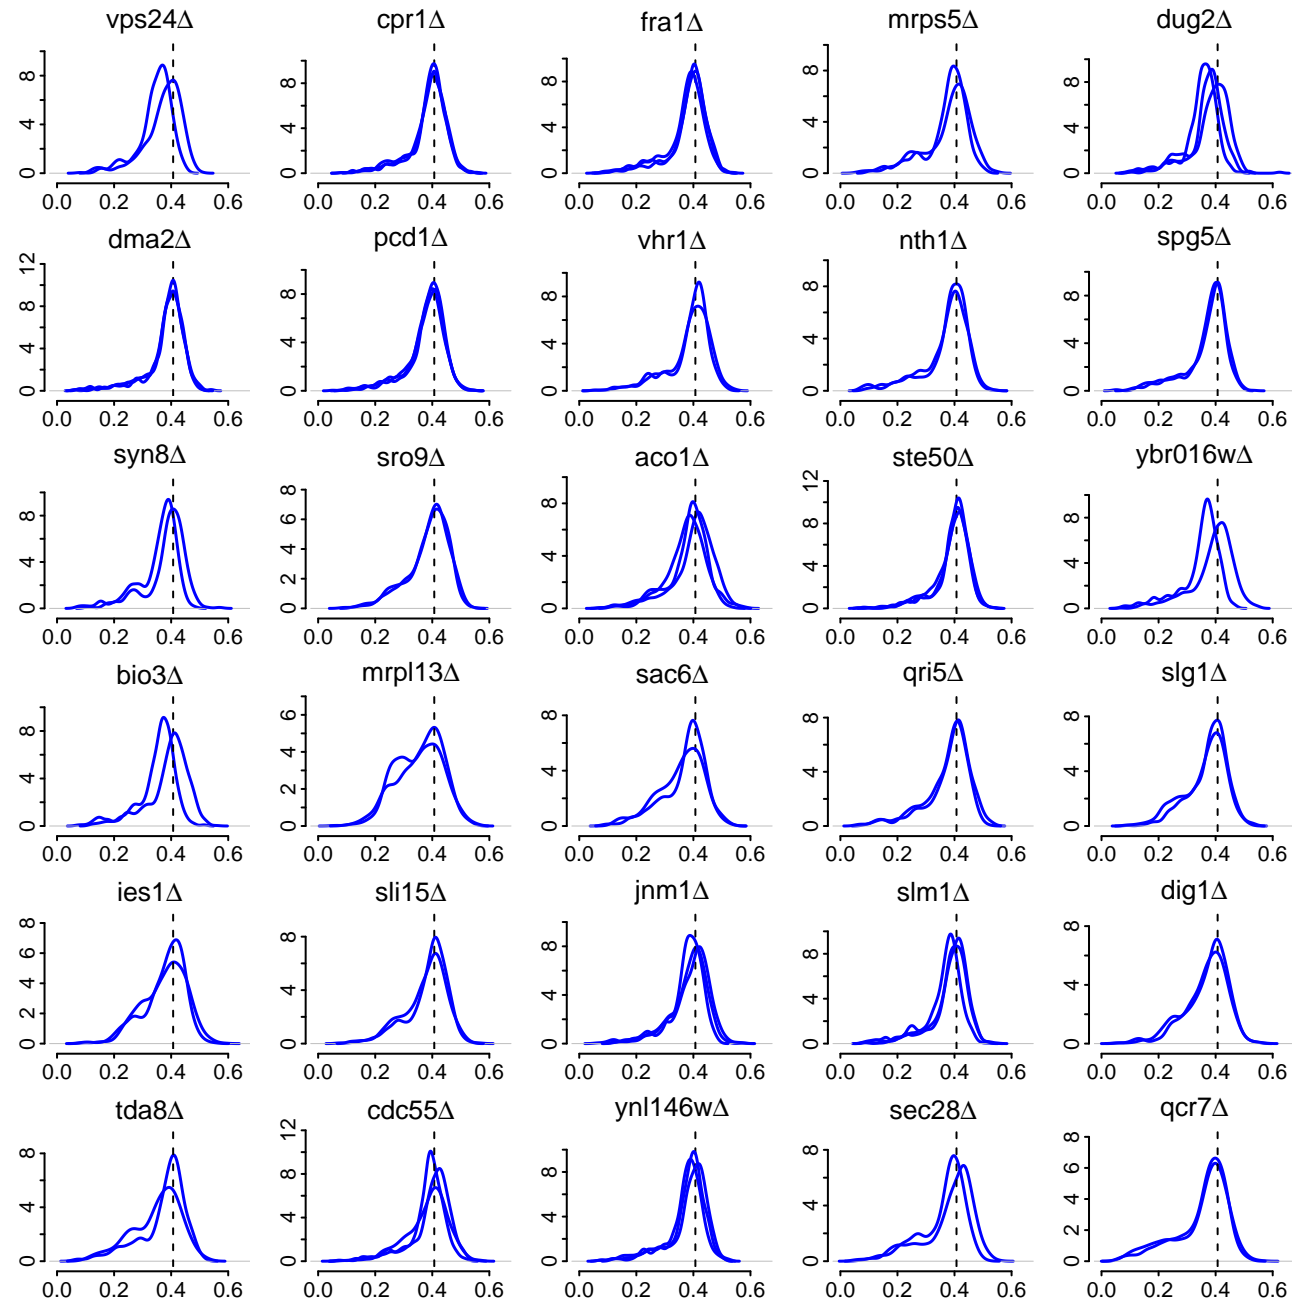

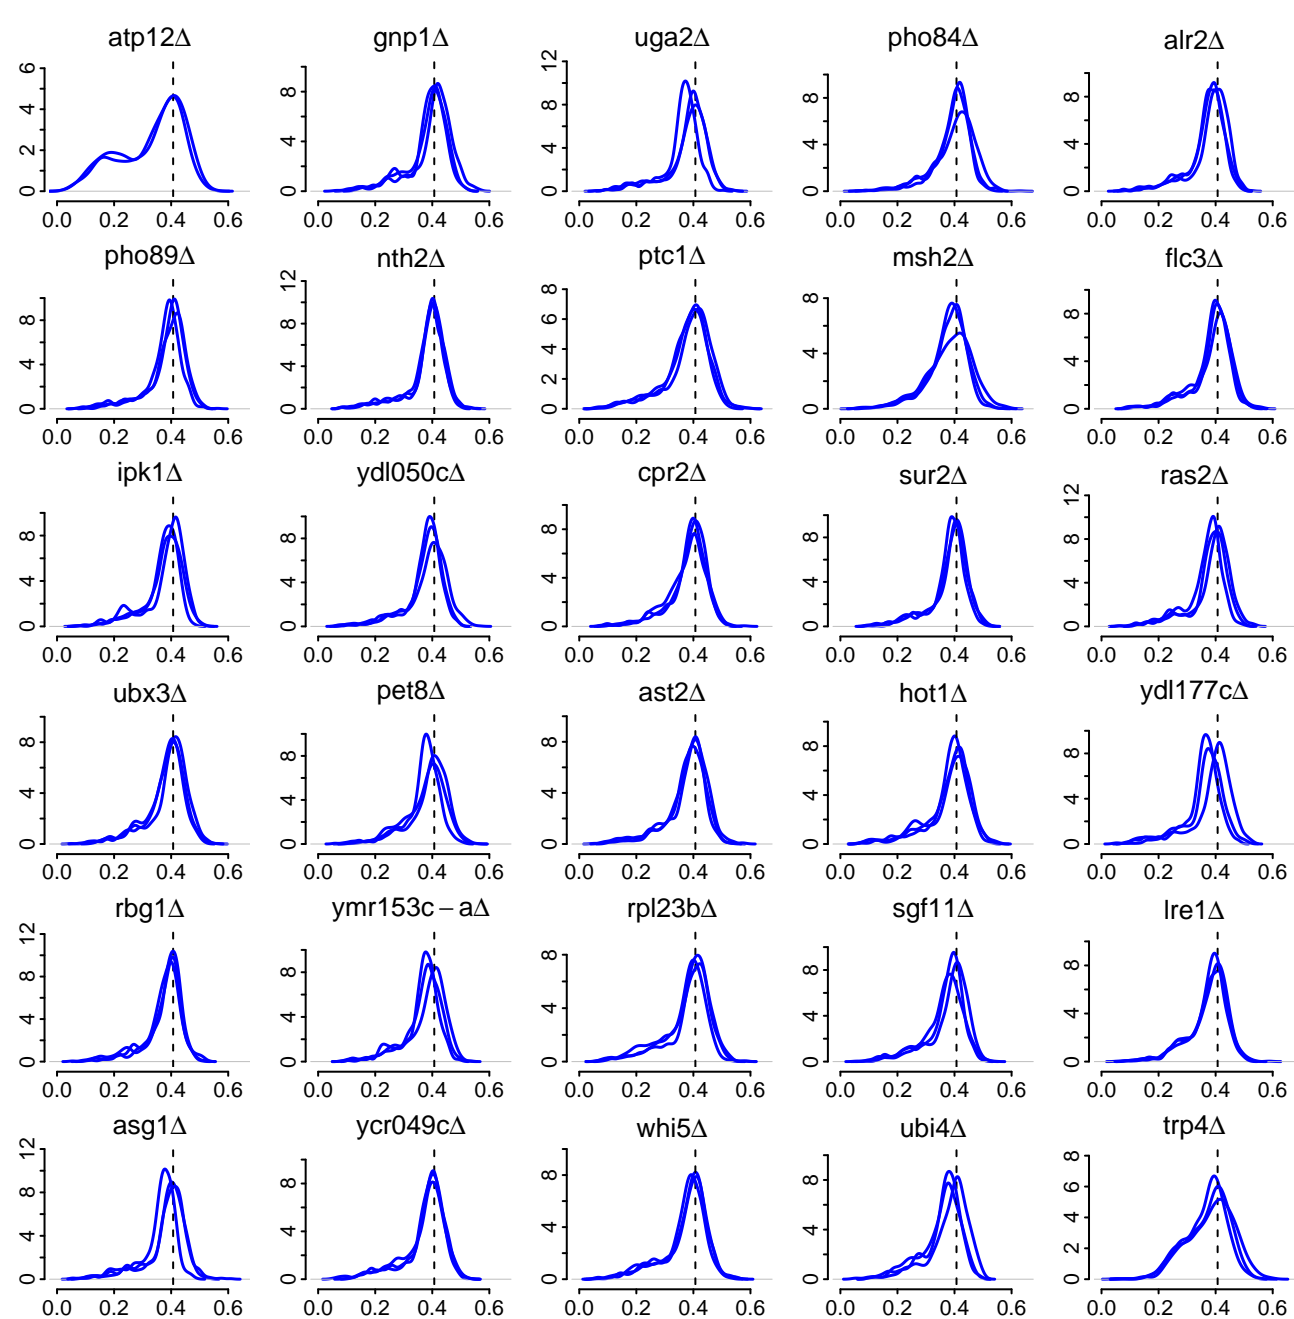

yar029w $\Delta$ 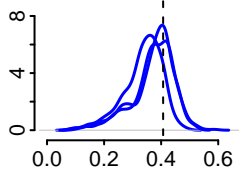gat2 $\Delta$ 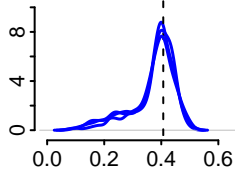tlg2 $\Delta$ 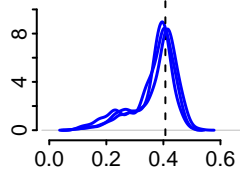blm10 $\Delta$ 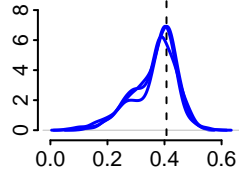hap5 $\Delta$ 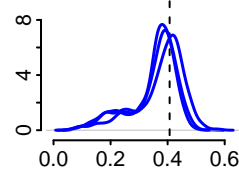atp23 $\Delta$ 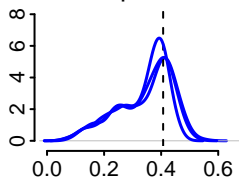atp10 $\Delta$ 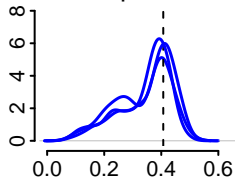

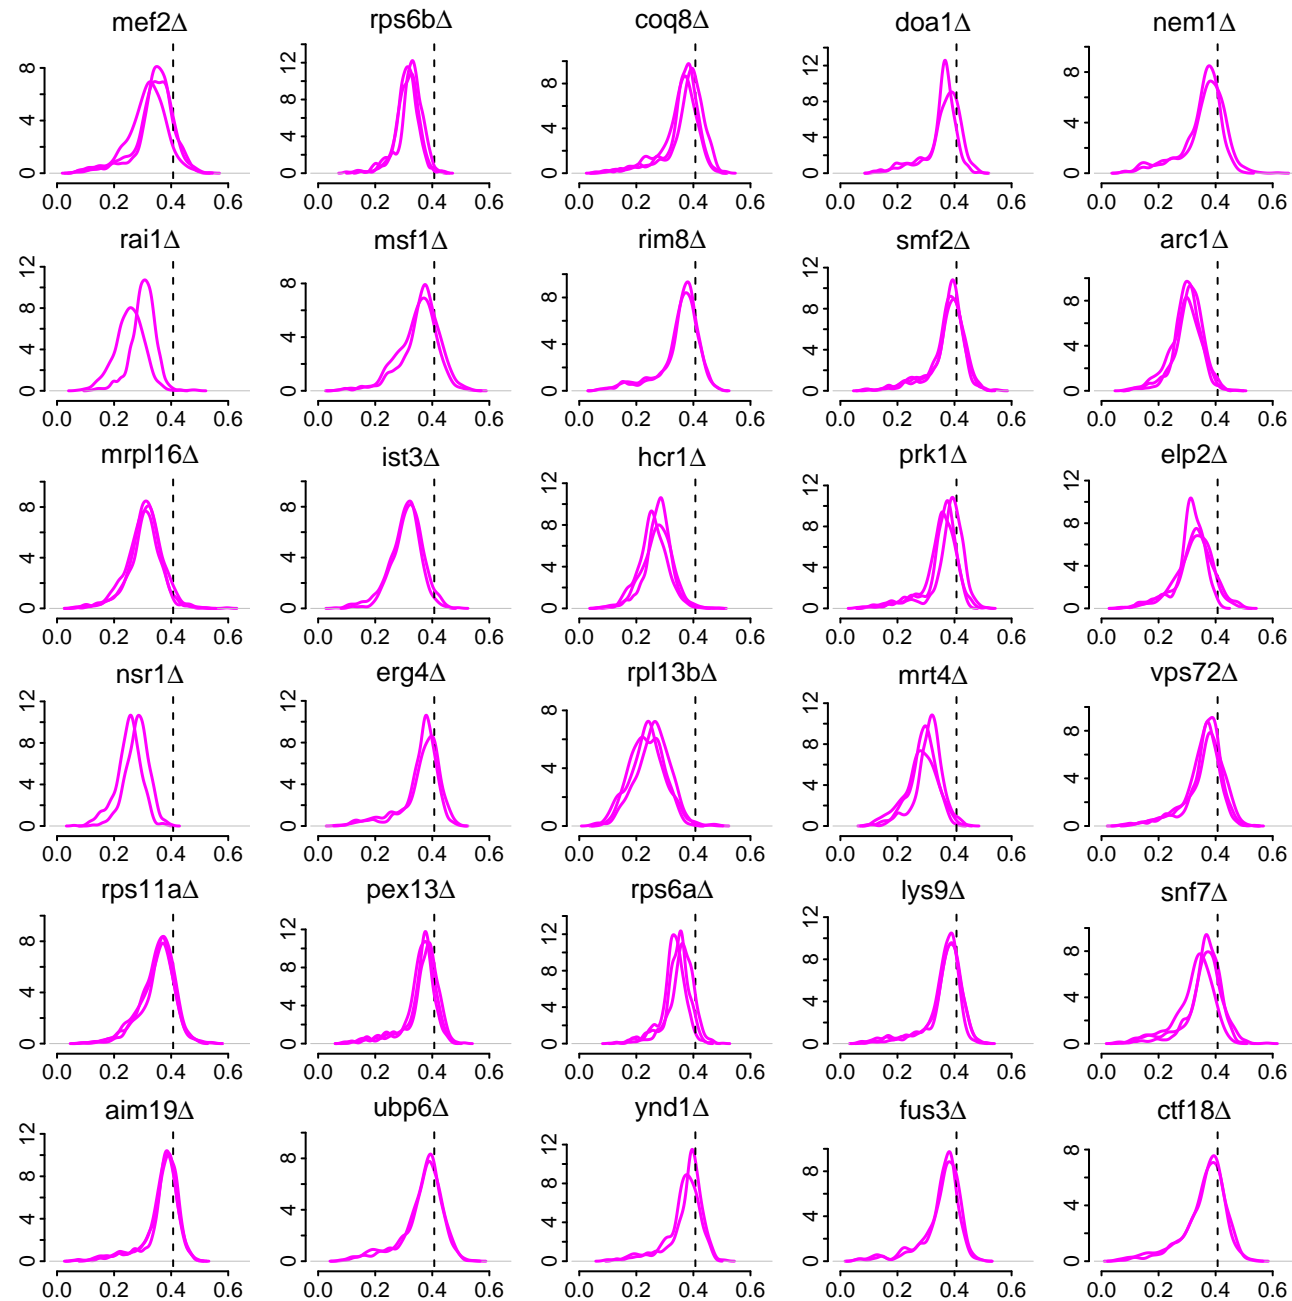

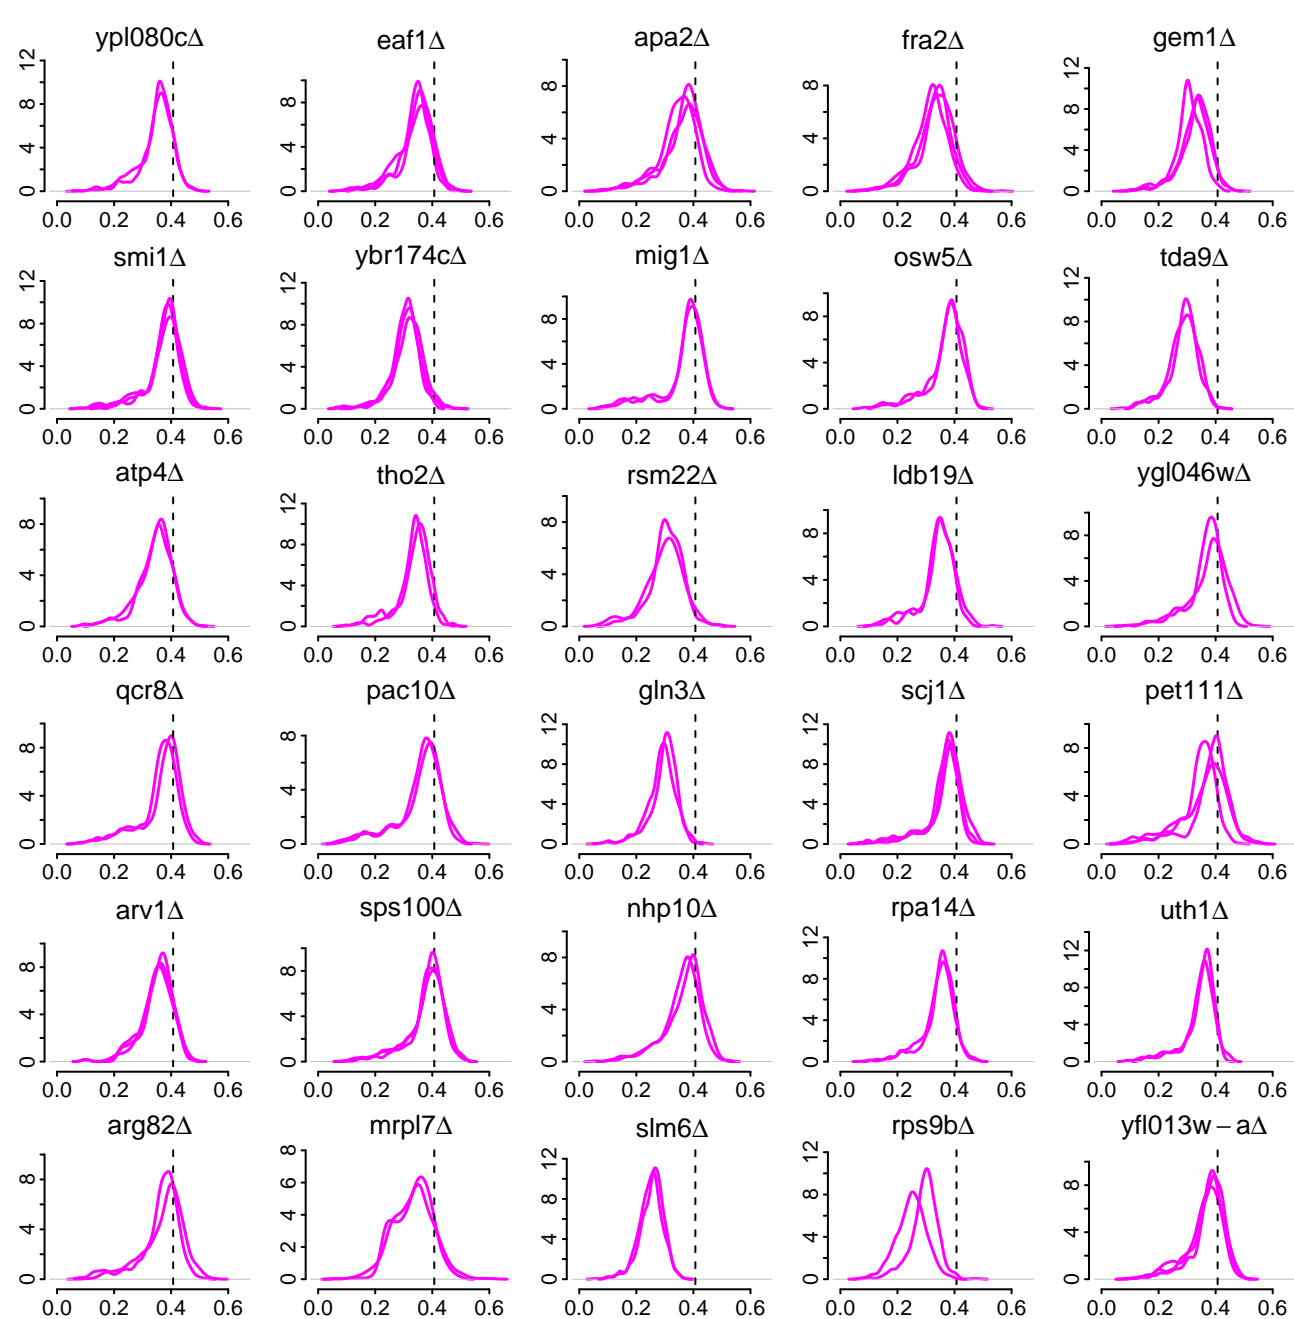

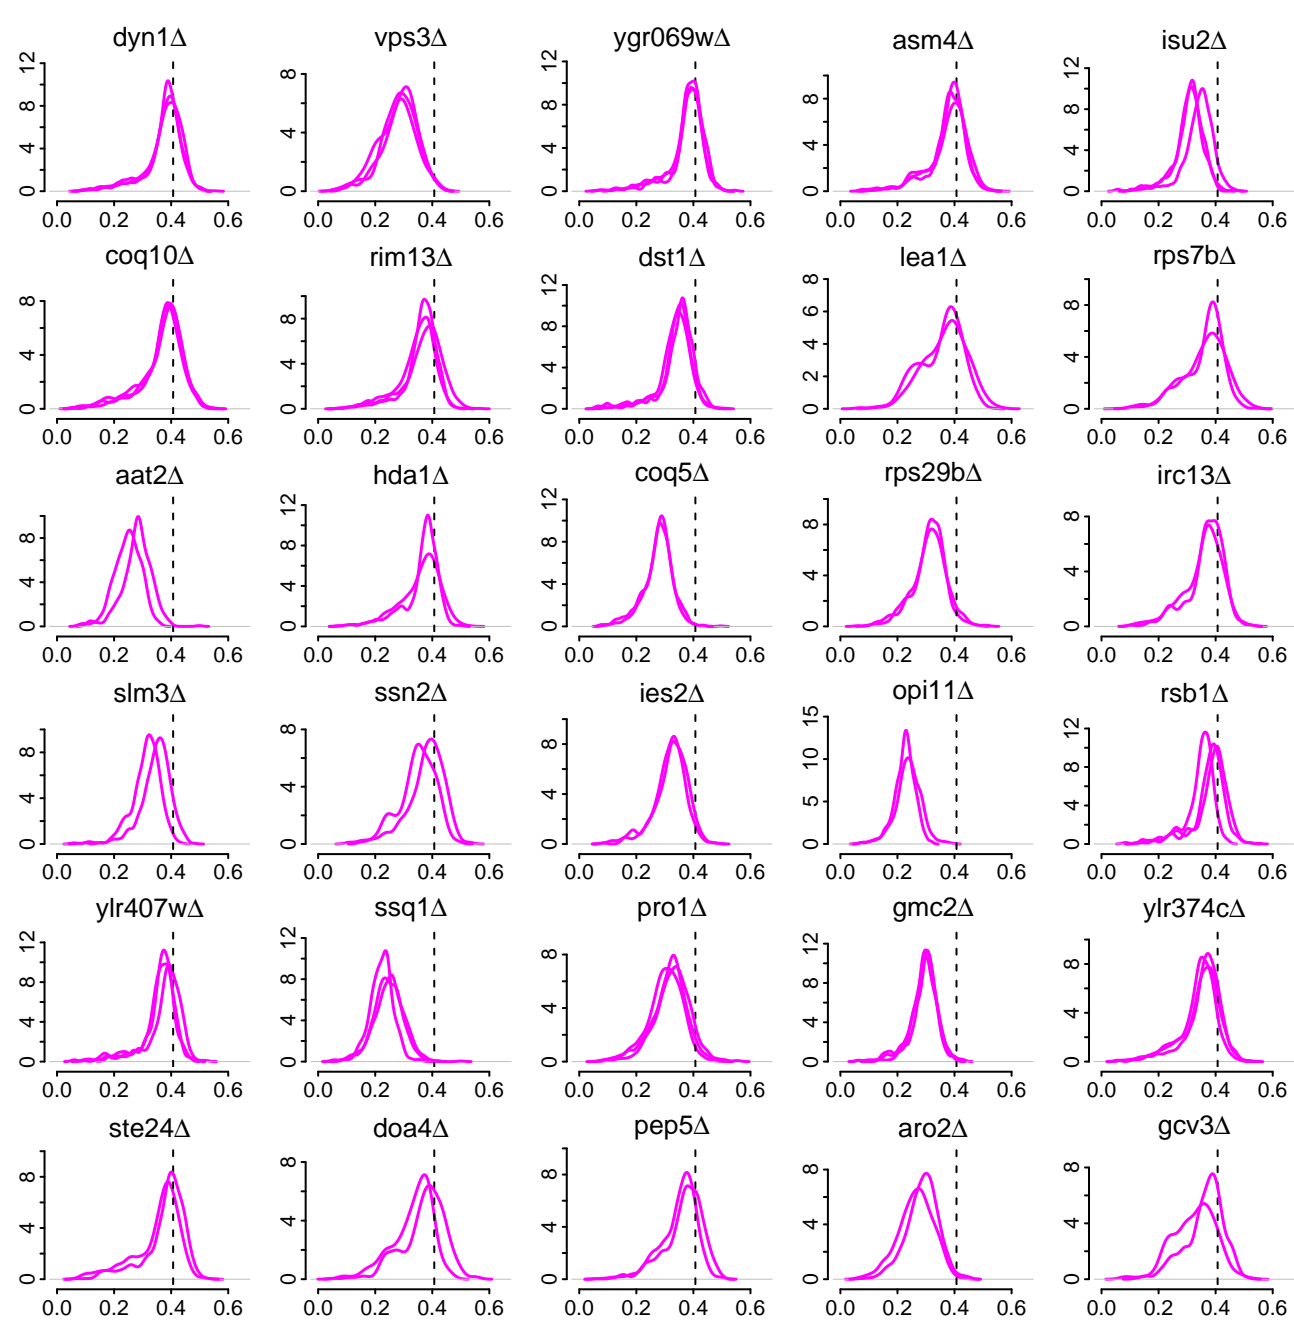

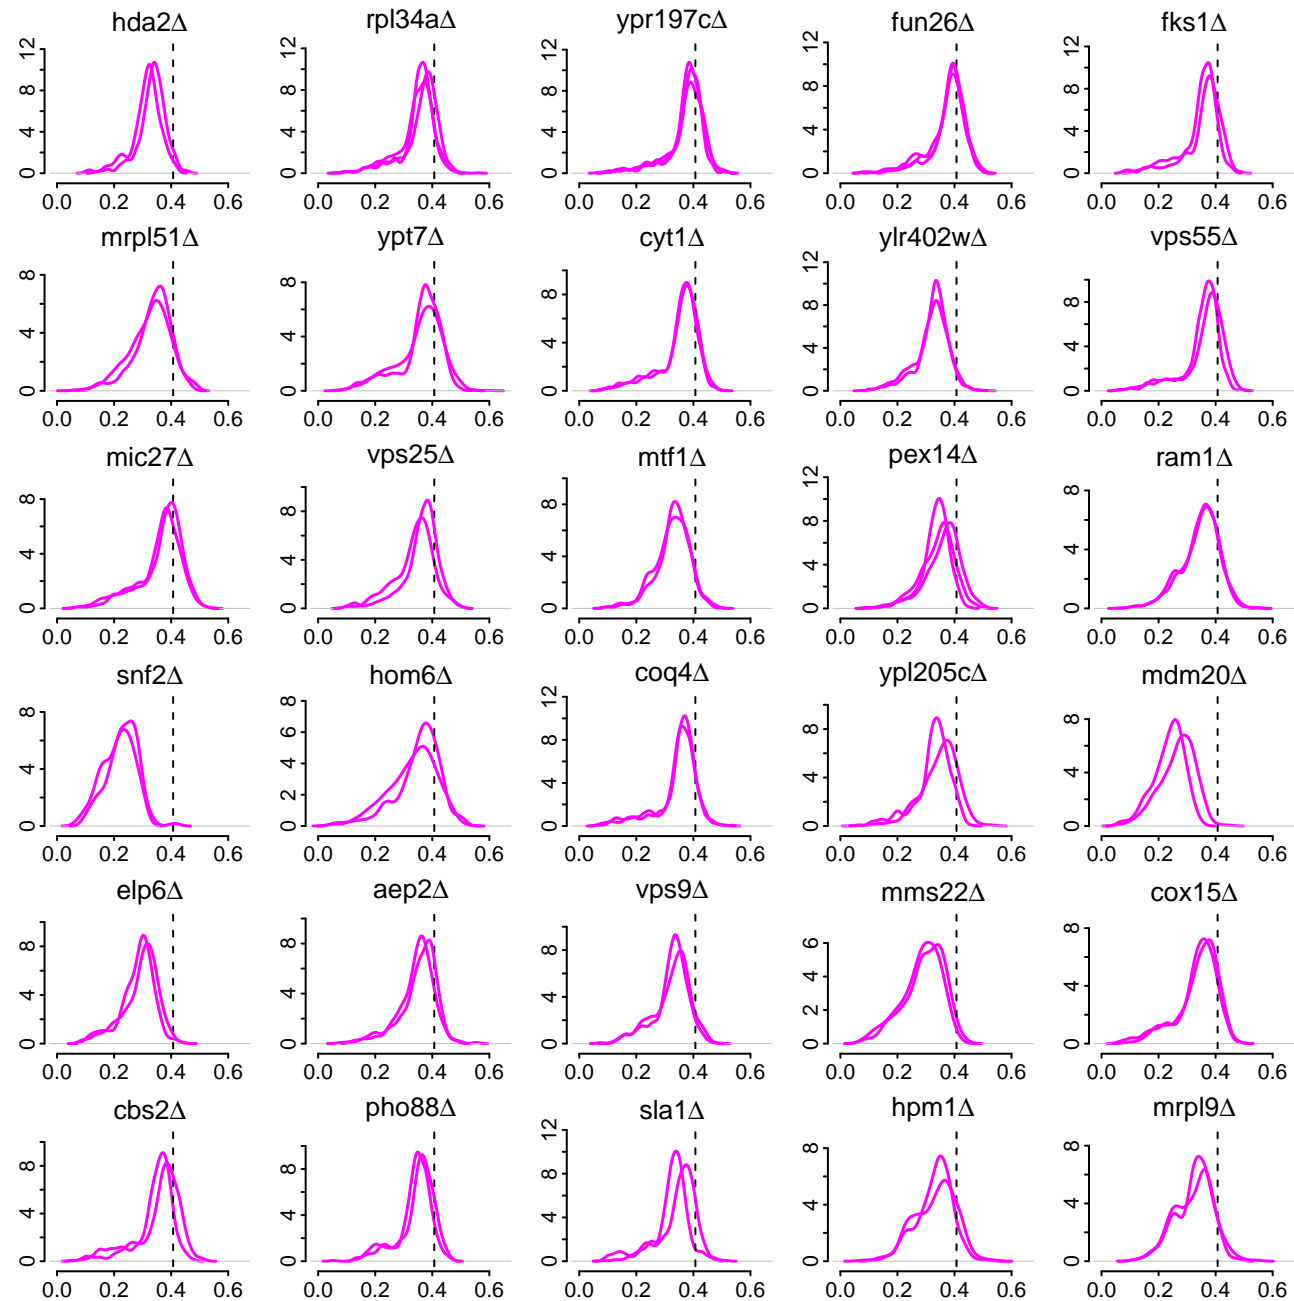

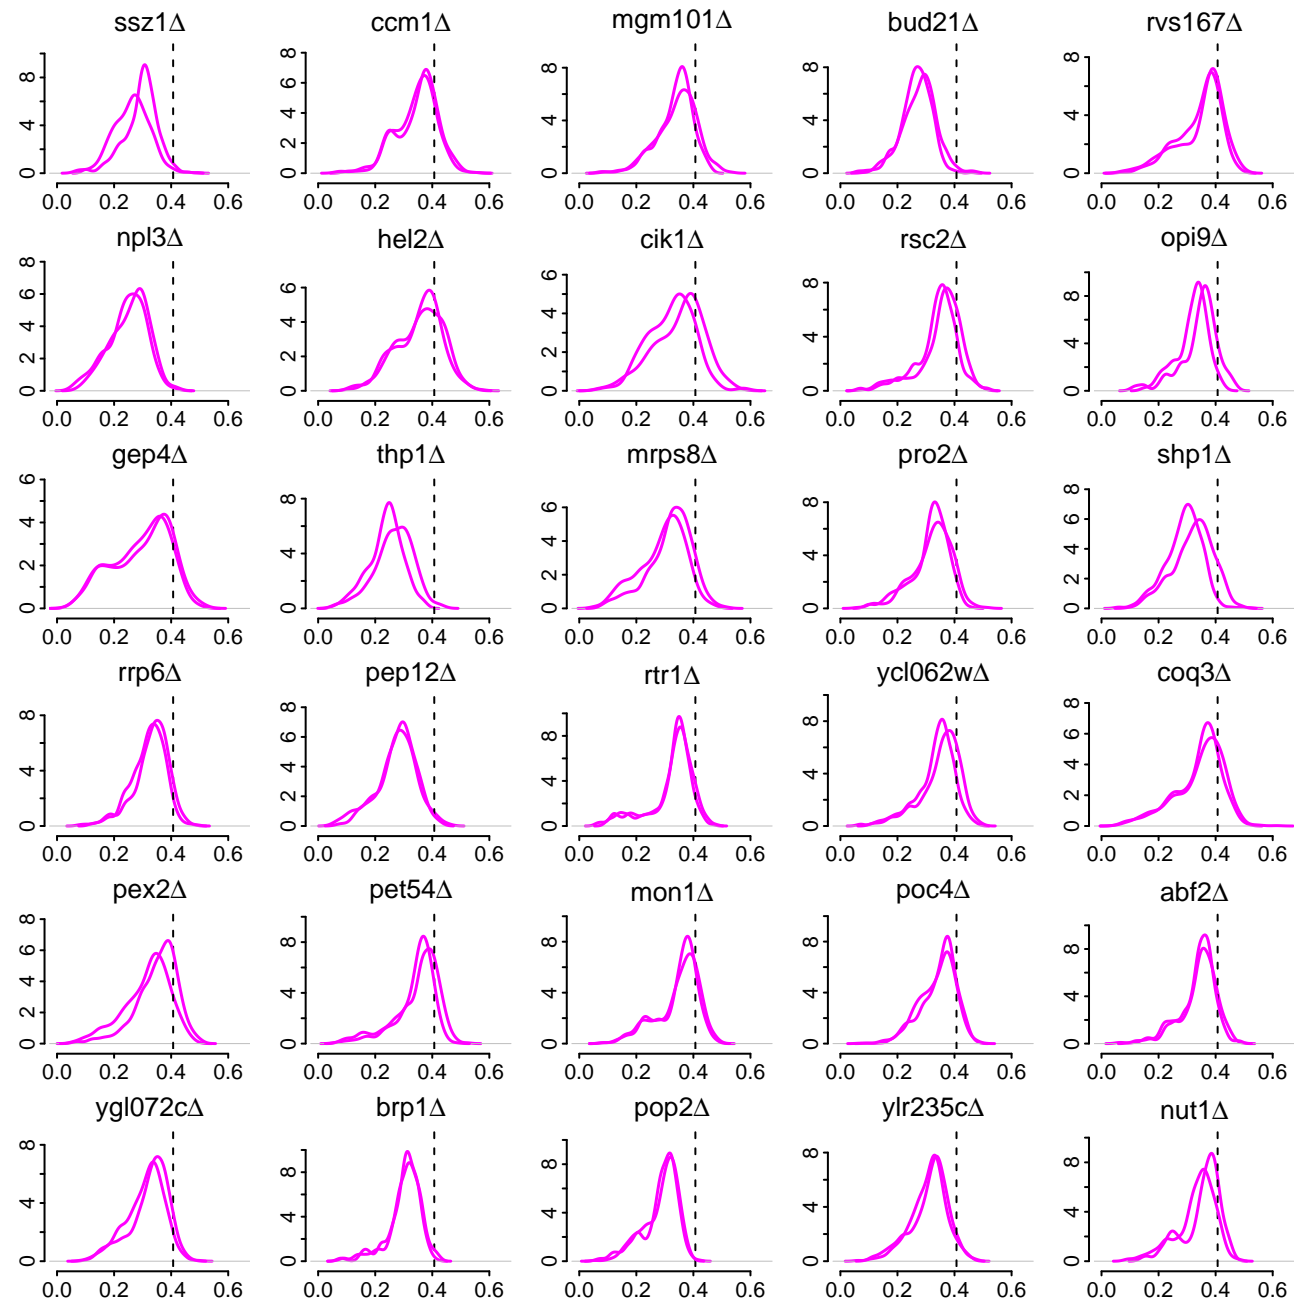

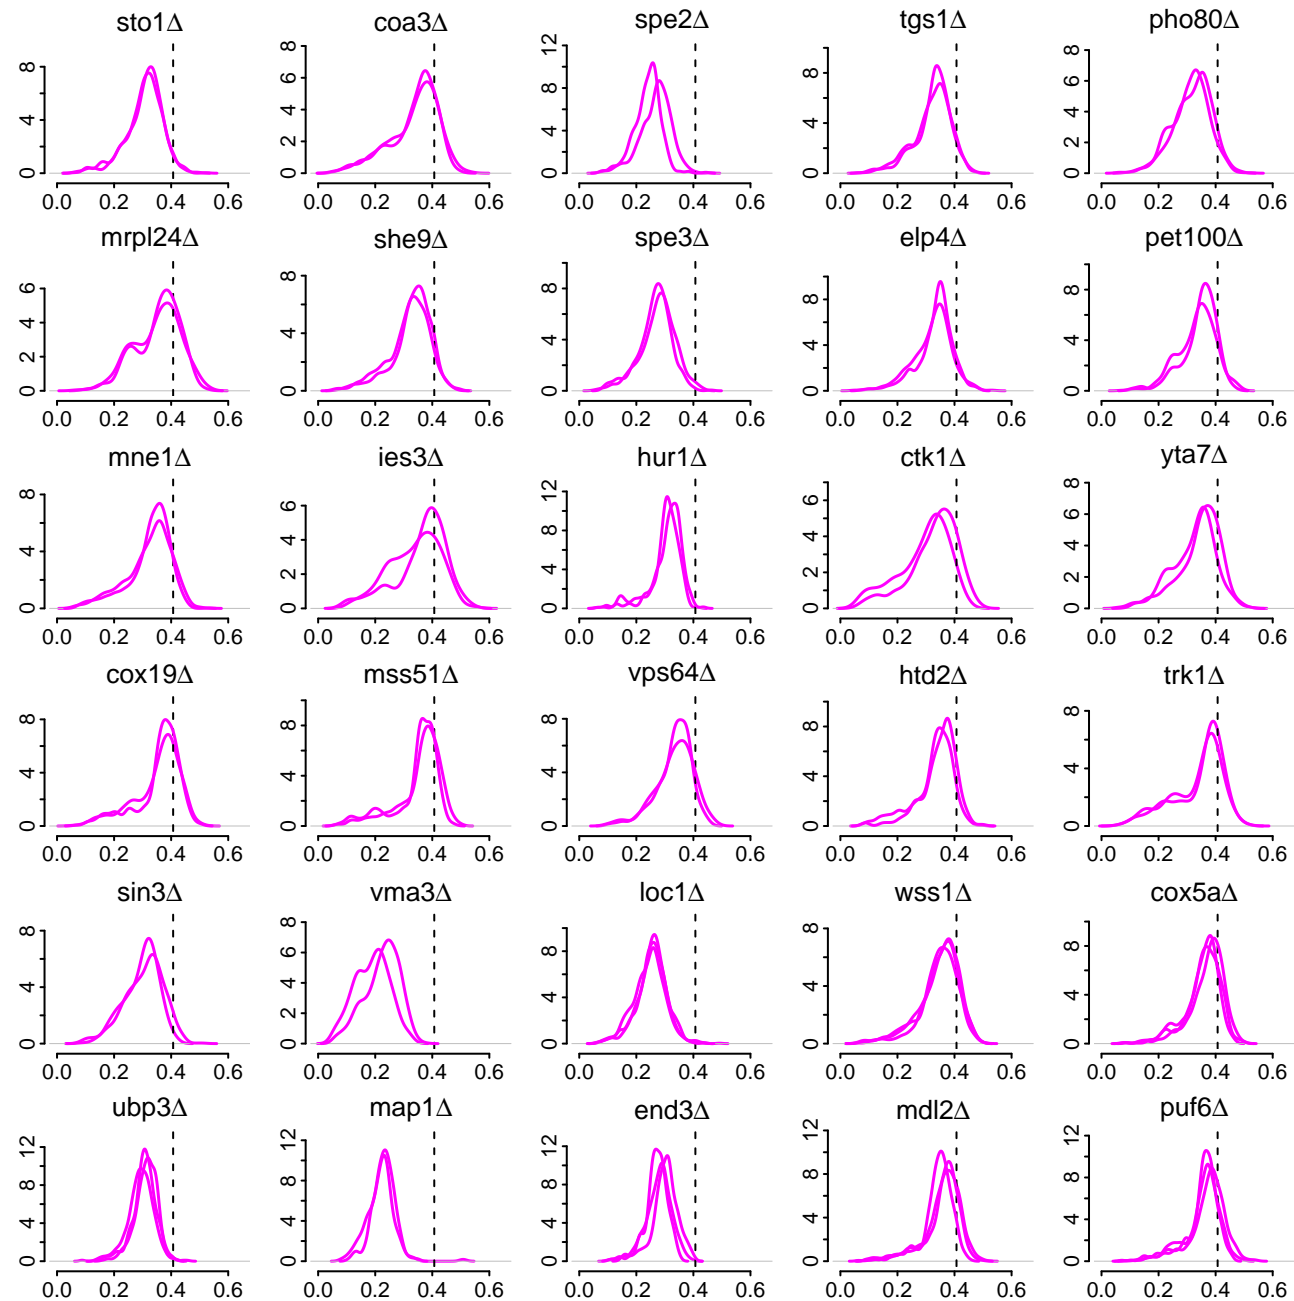

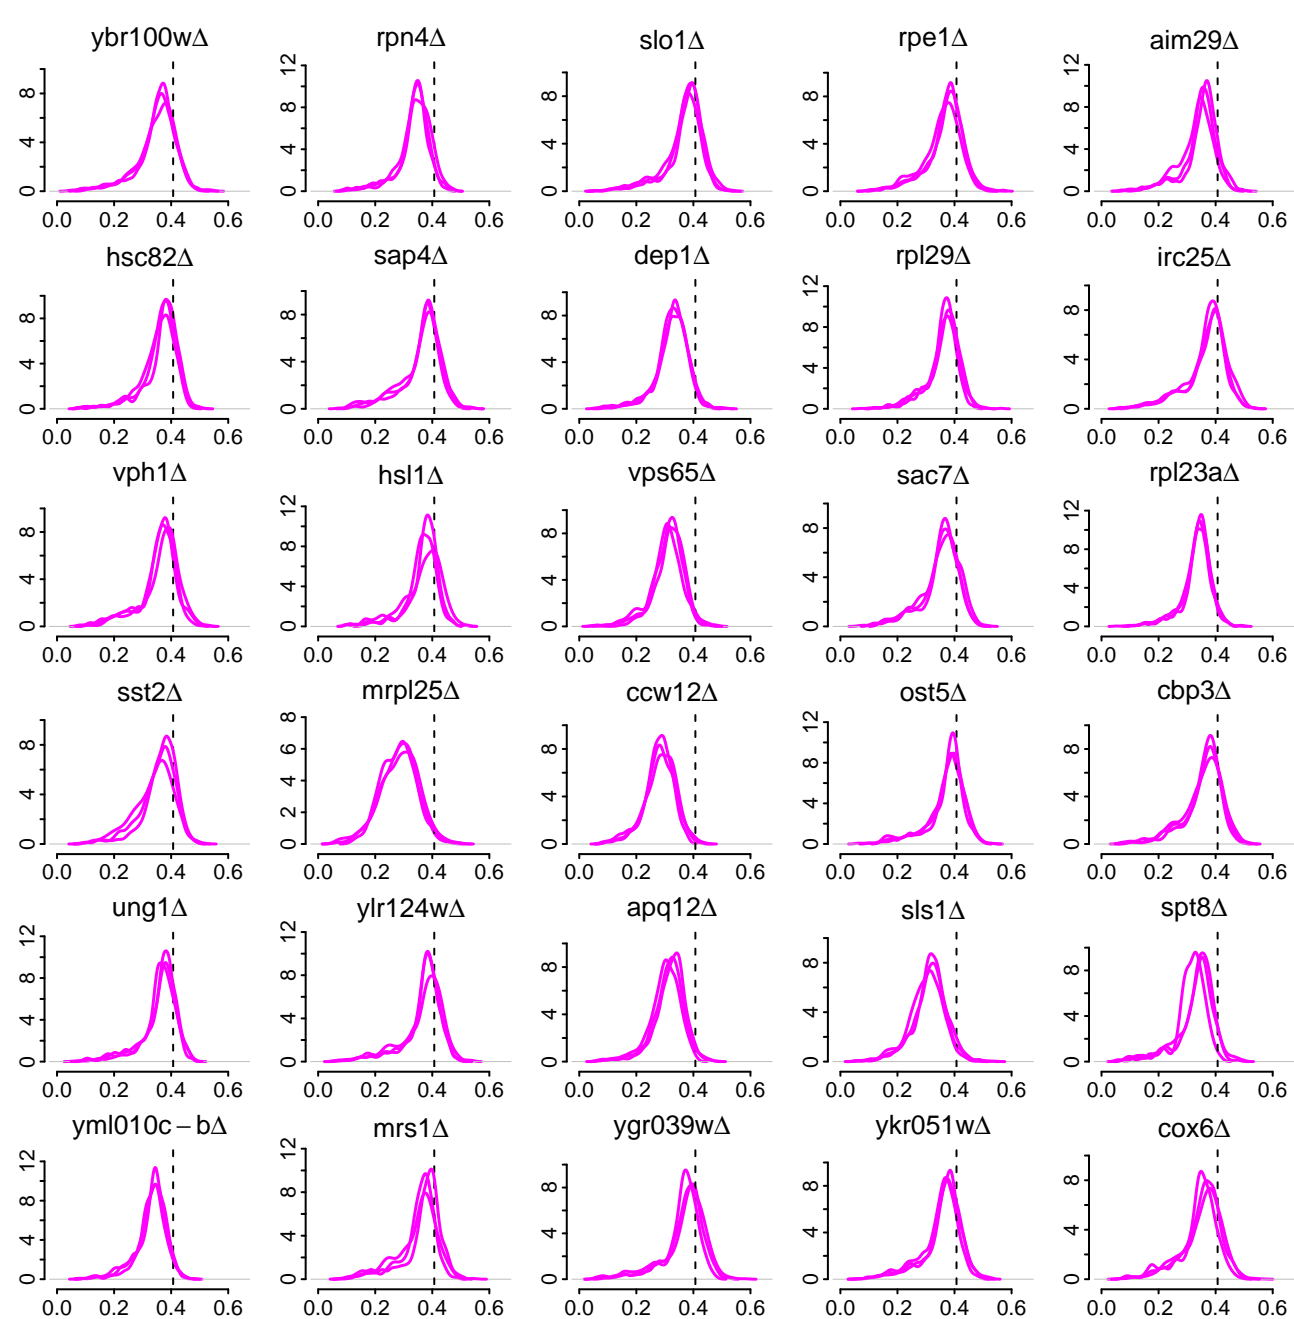

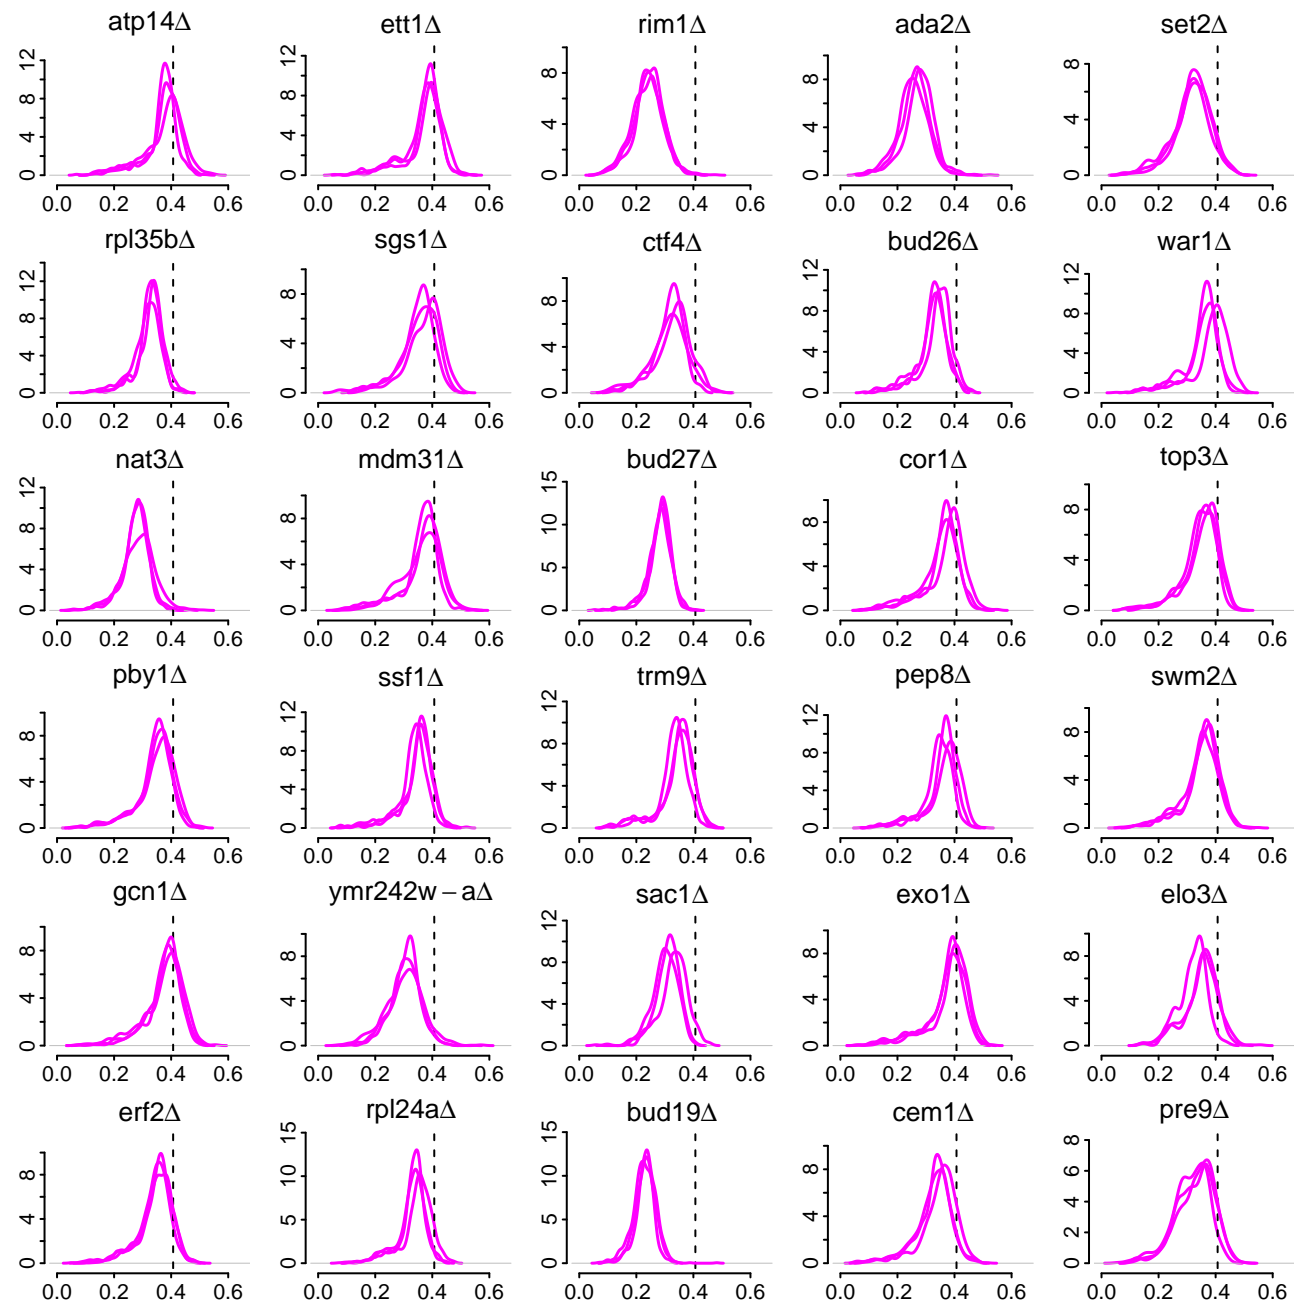

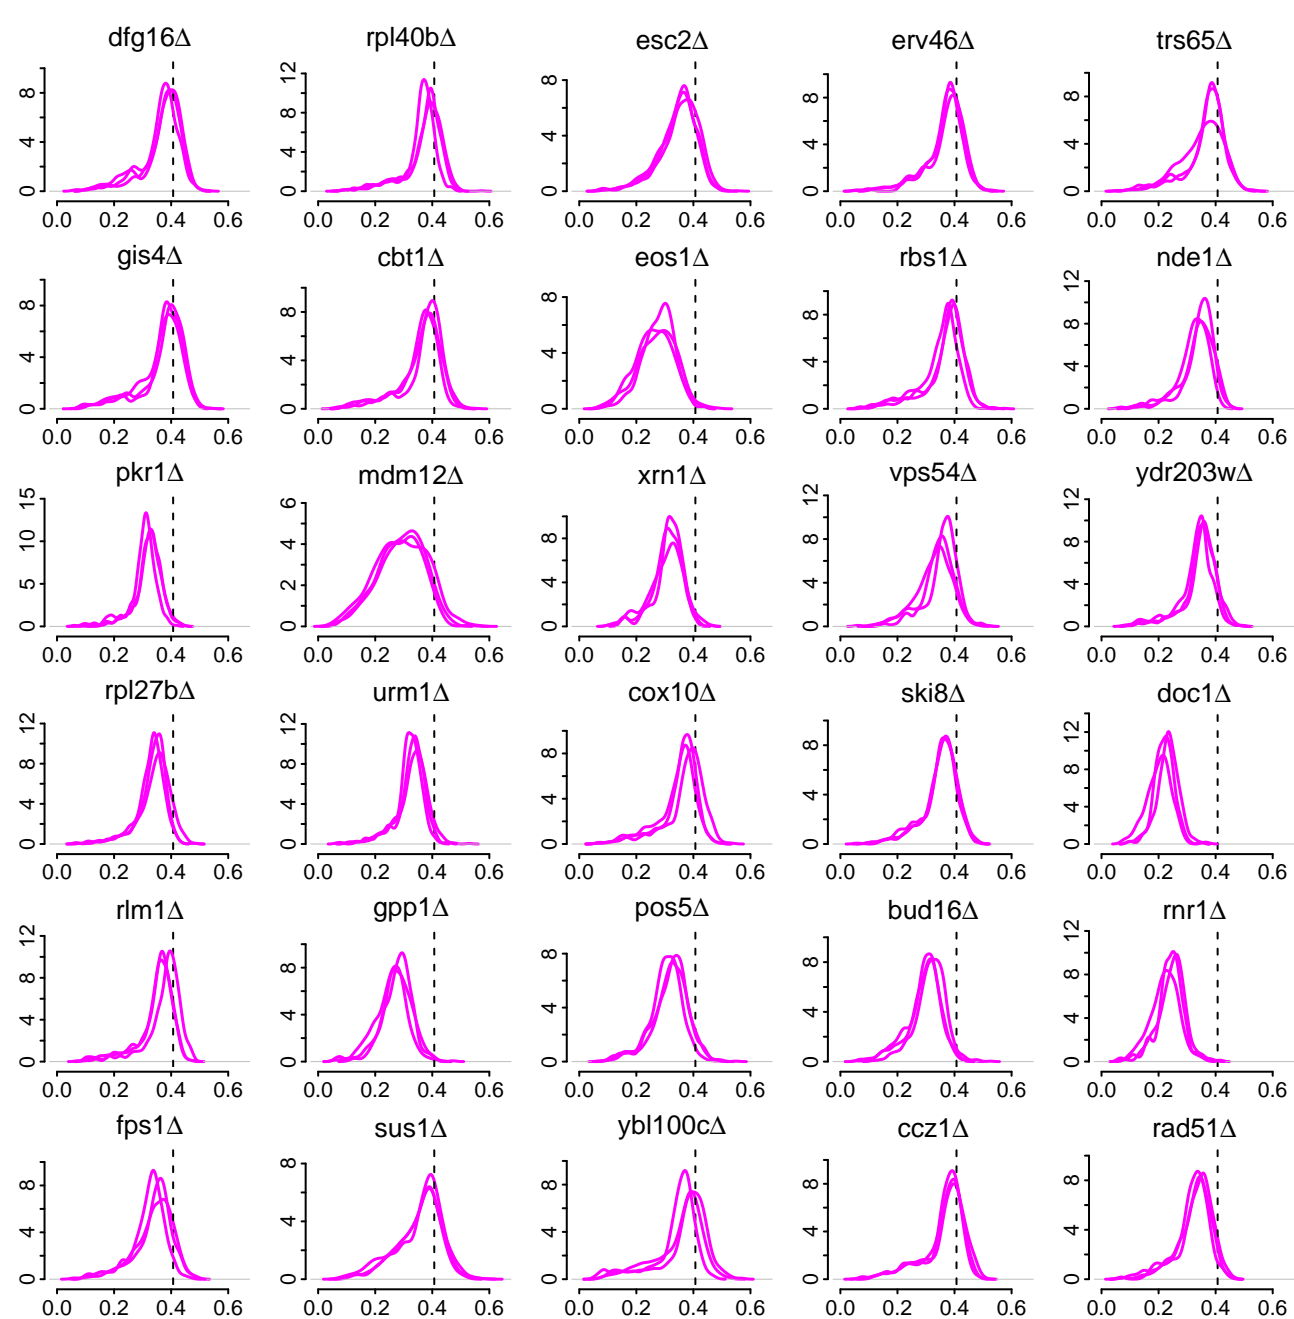

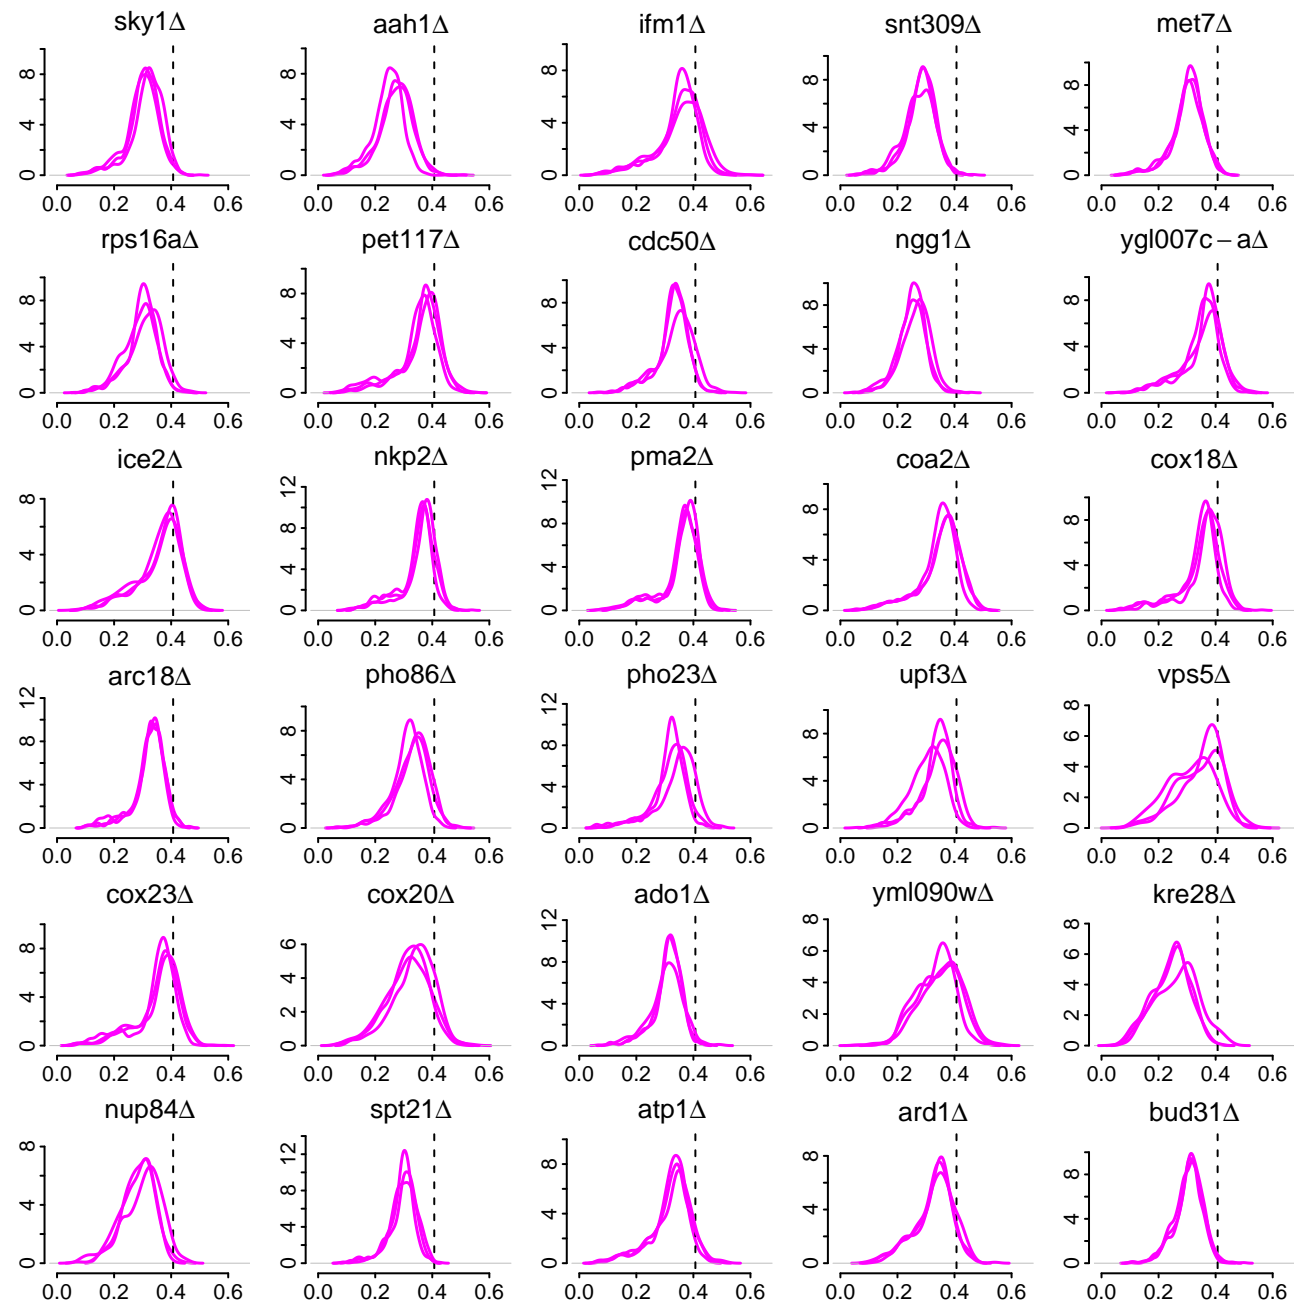

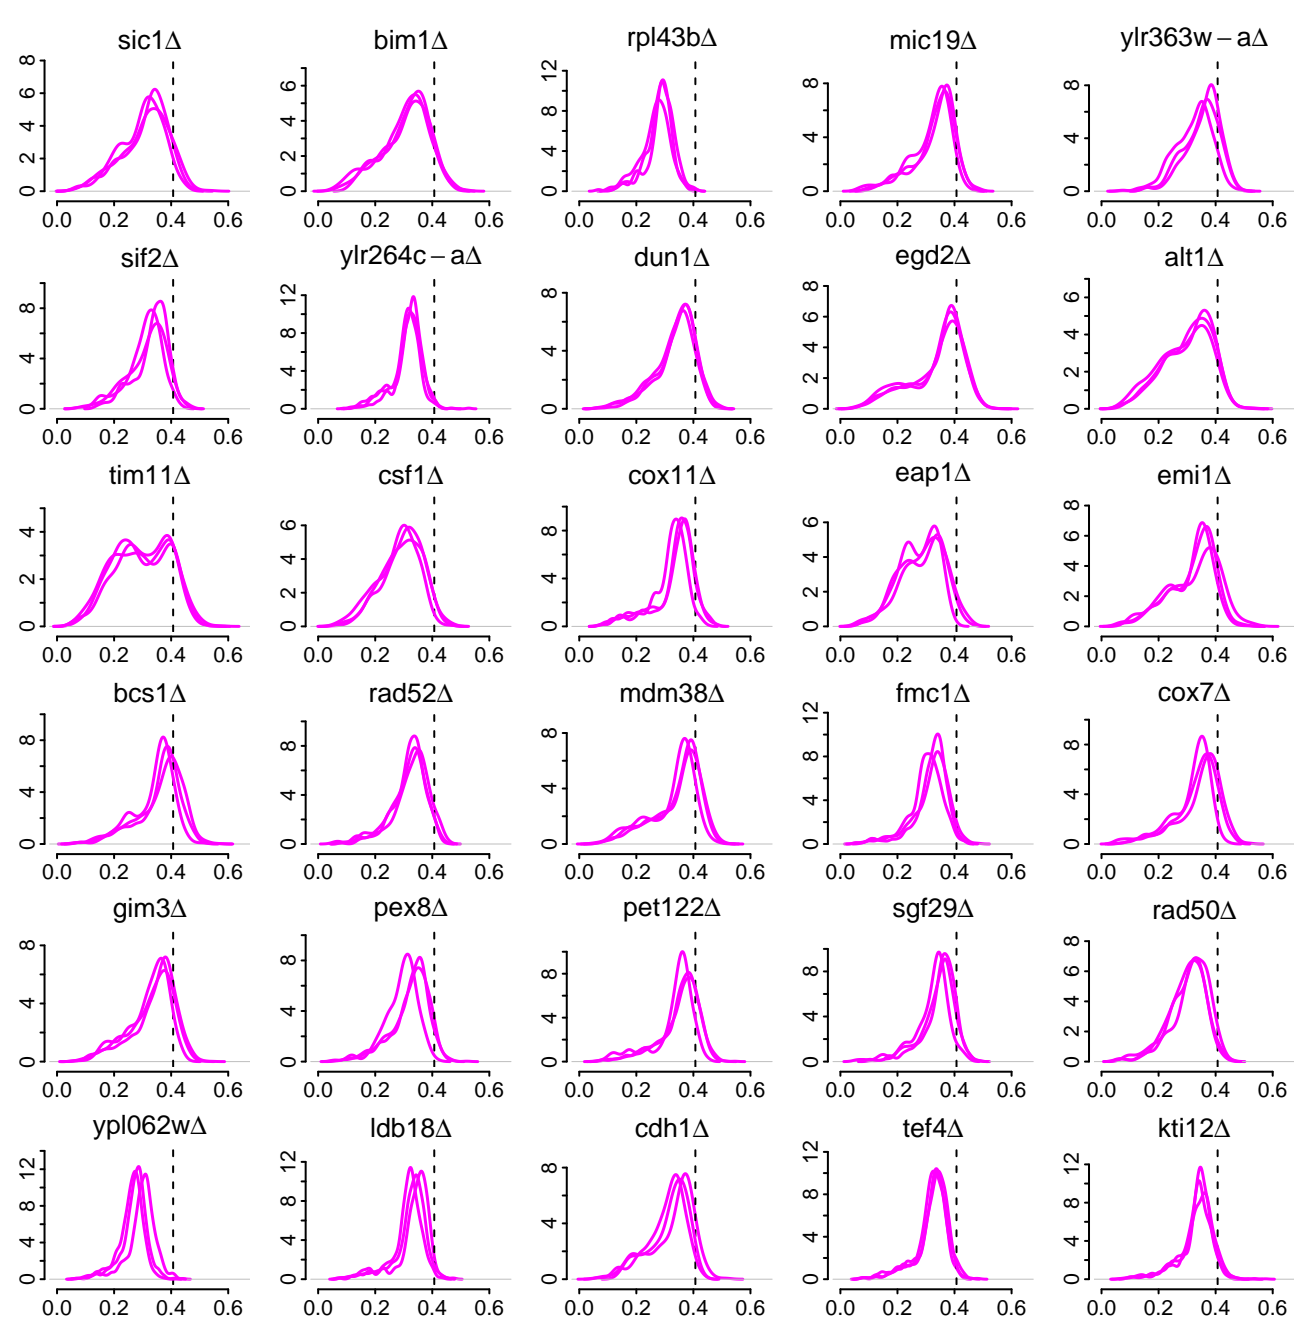

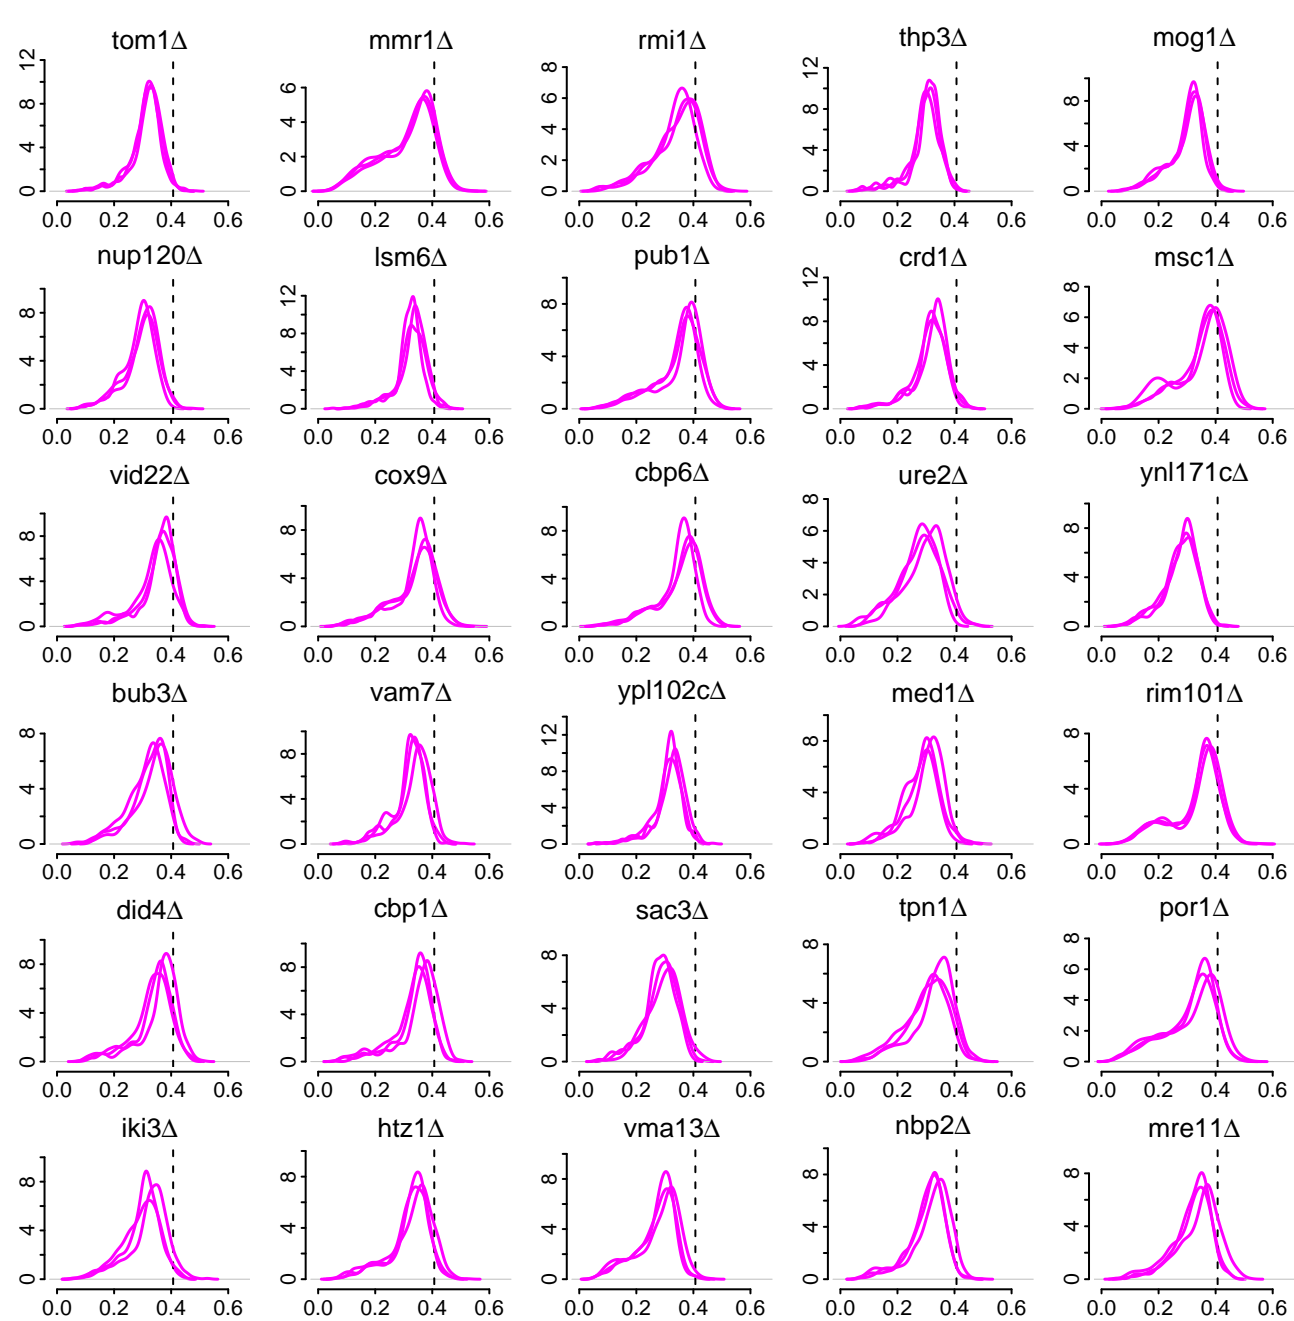

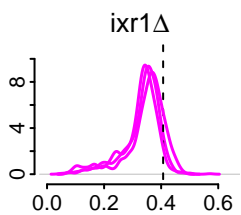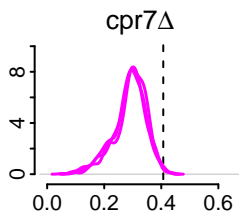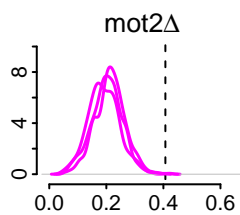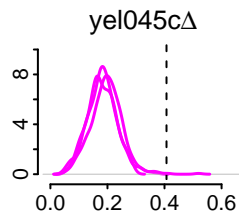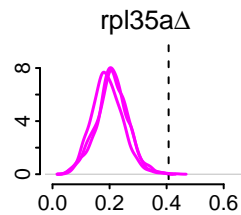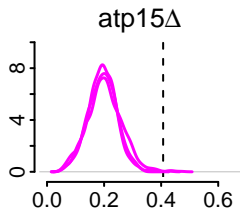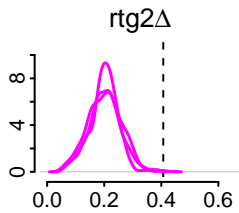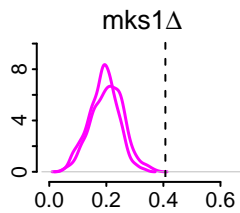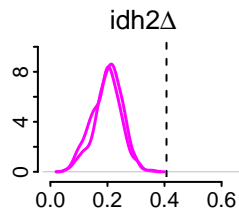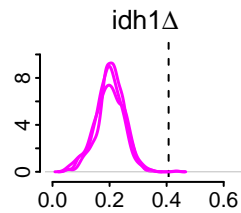

mnn10 $\Delta$ 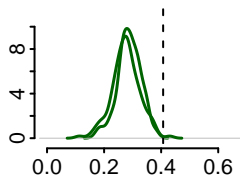rpl43a $\Delta$ 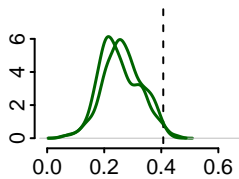sse1 $\Delta$ 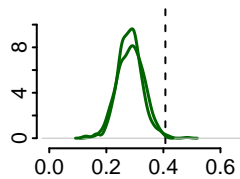ric1 $\Delta$ 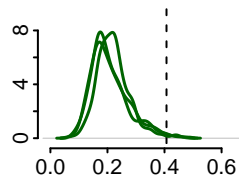atp17 $\Delta$ 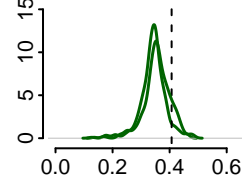glo3 $\Delta$ 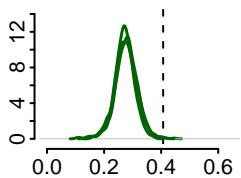rps10a $\Delta$ 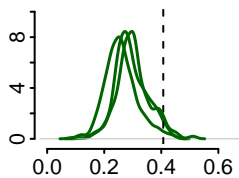rrd1 $\Delta$ 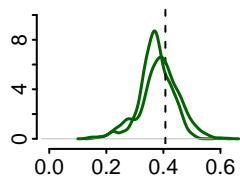pet123 $\Delta$ 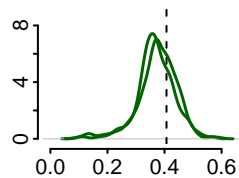rtc6 $\Delta$ 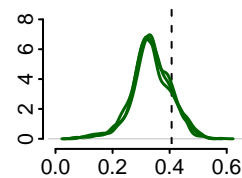

mdj1 $\Delta$ 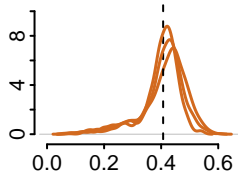asf1 $\Delta$ 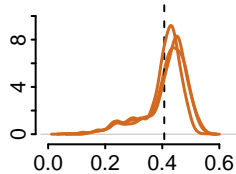bub1 $\Delta$ 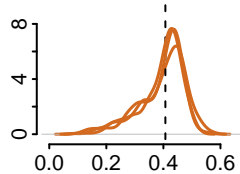atp20 $\Delta$ 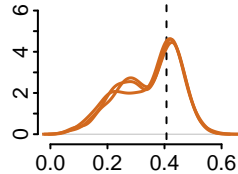

elo2 $\Delta$ 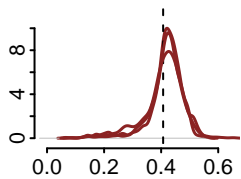mrpl28 $\Delta$ 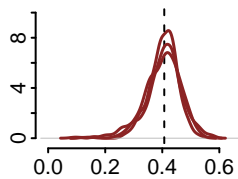bnr1 $\Delta$ 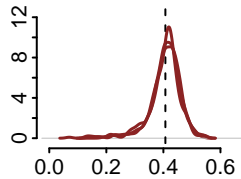

sma2 $\Delta$ 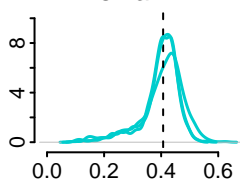ura2 $\Delta$ 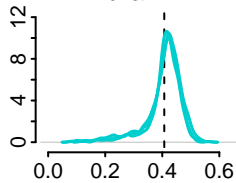ybr225w $\Delta$ 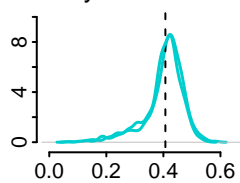vps30 $\Delta$ 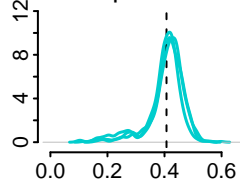far7 $\Delta$ 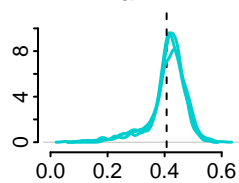ngr1 $\Delta$ 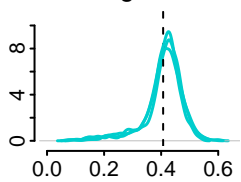

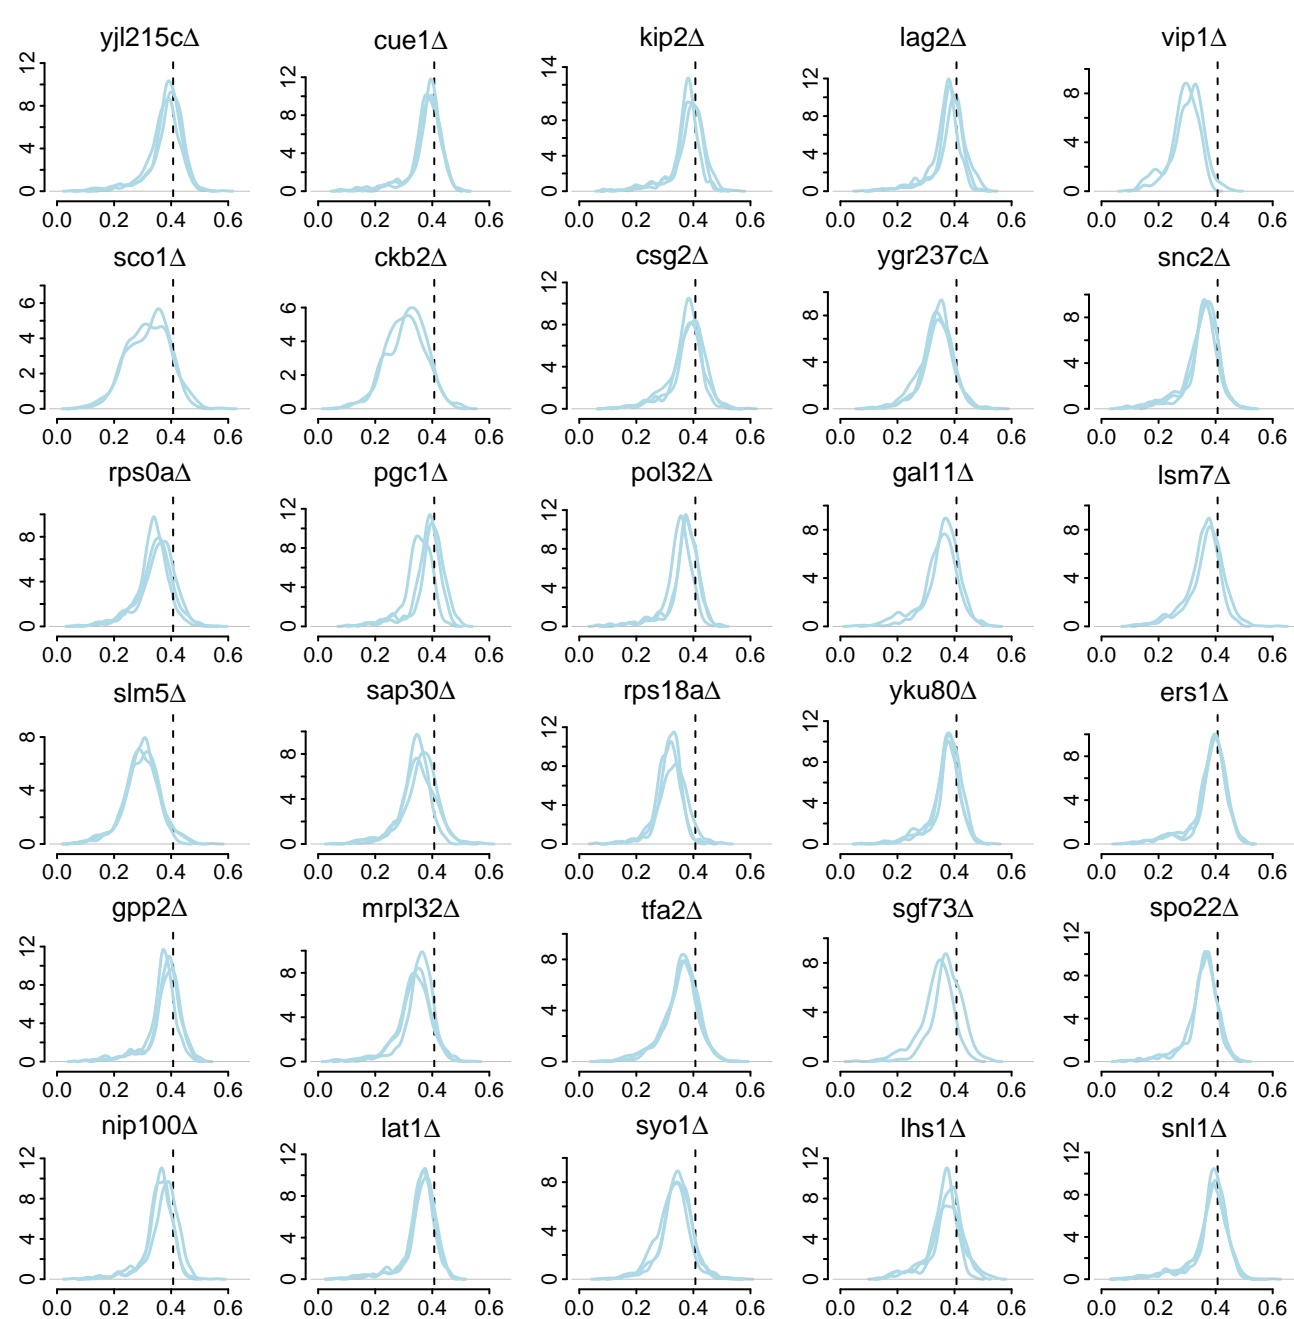

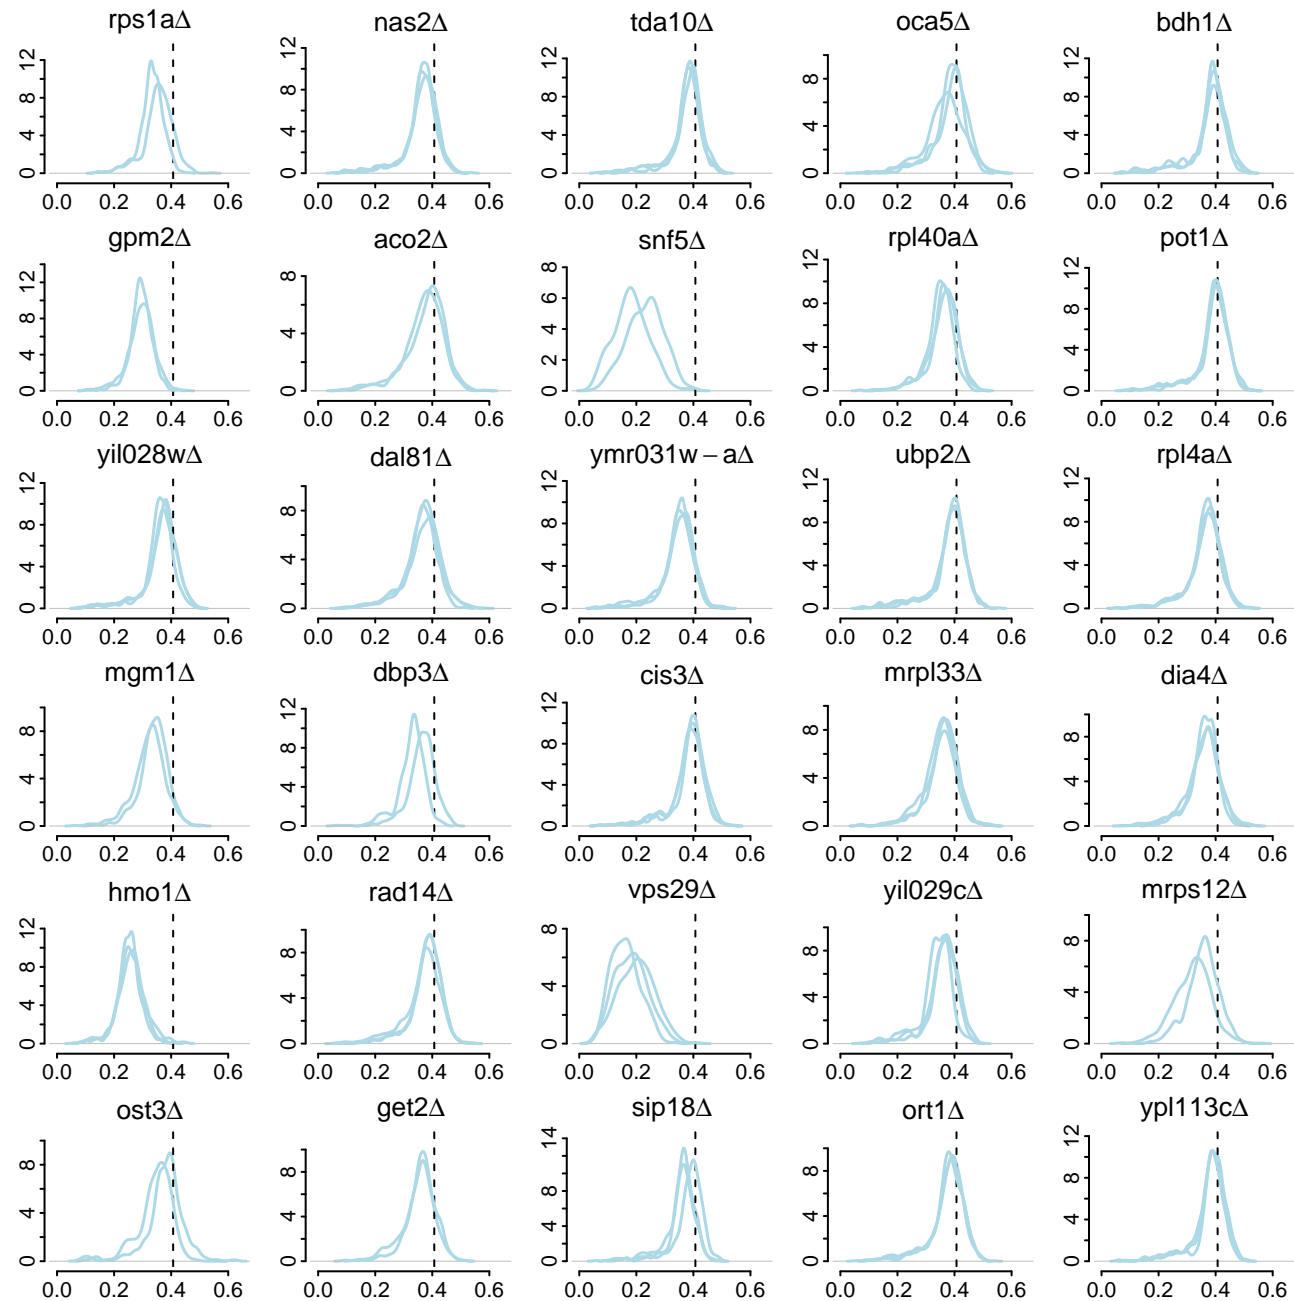

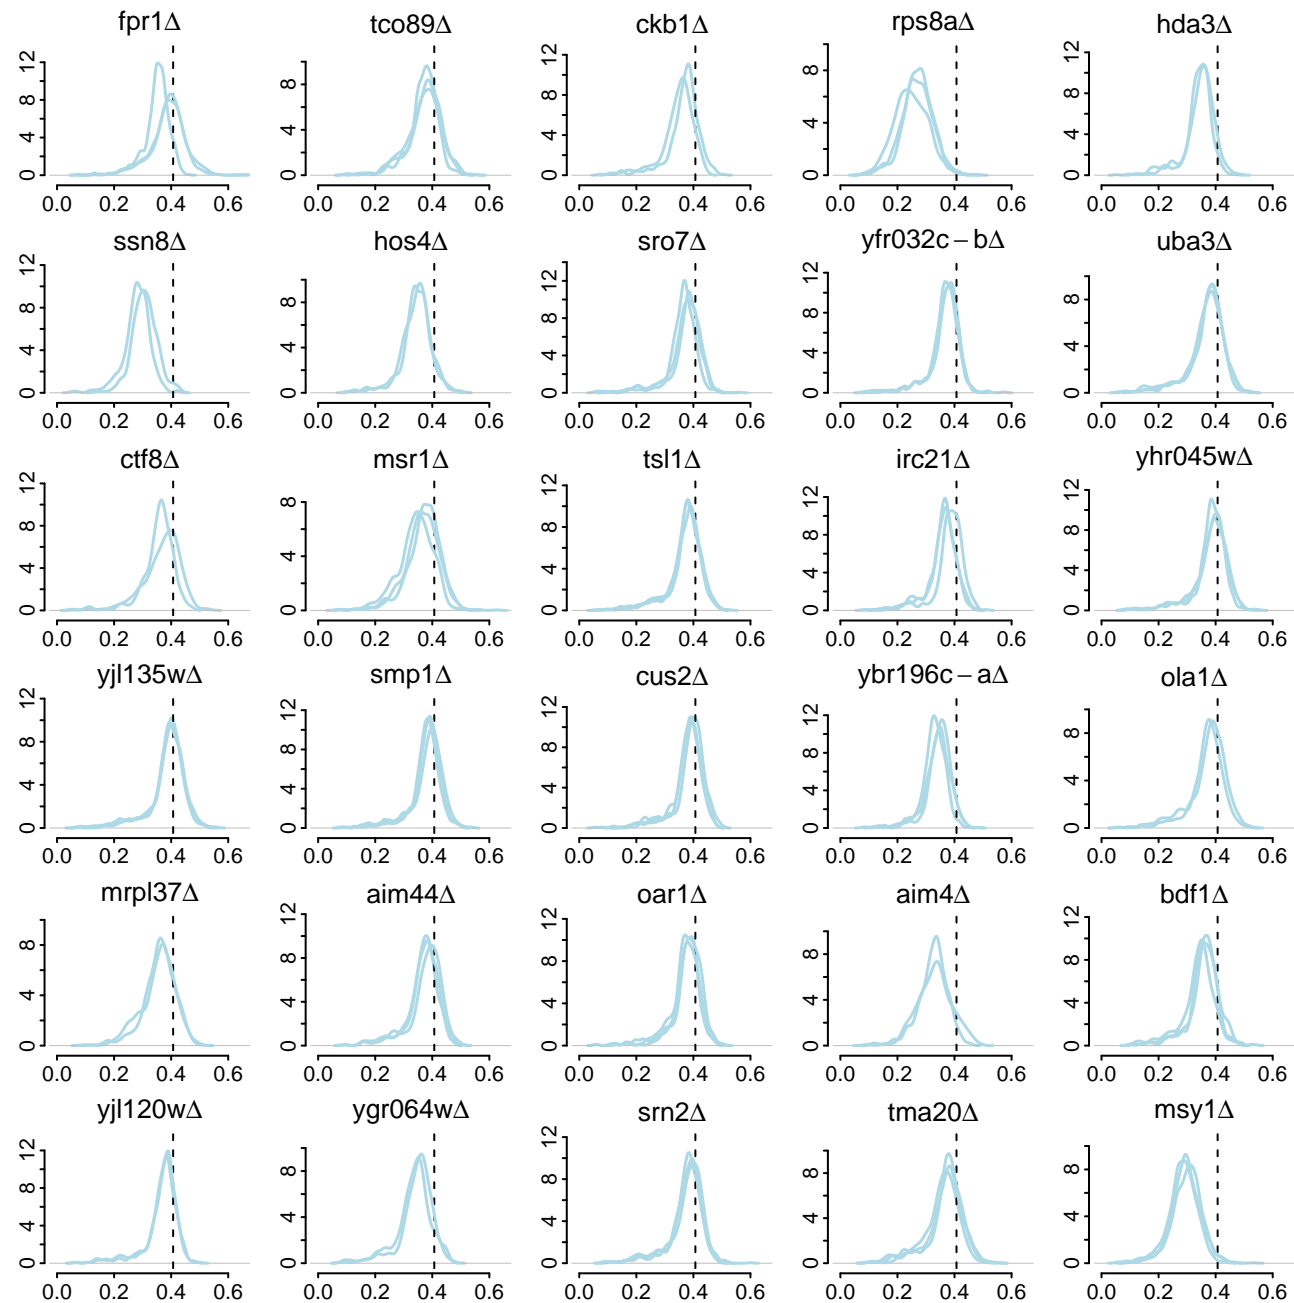

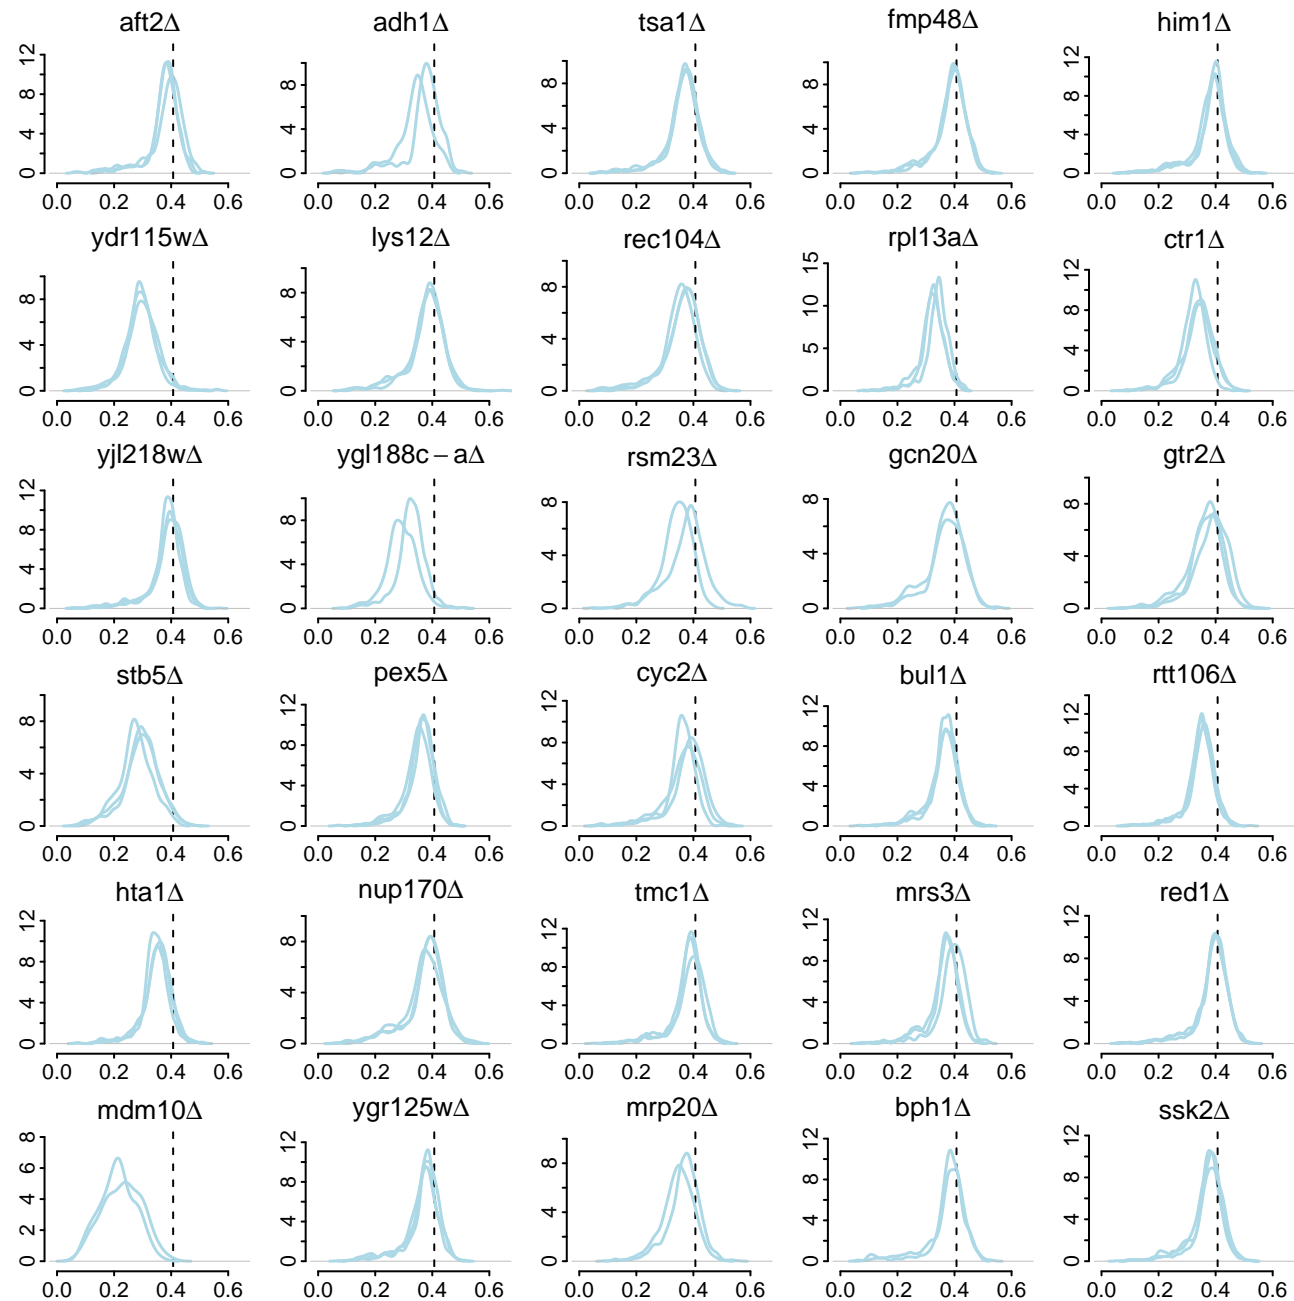

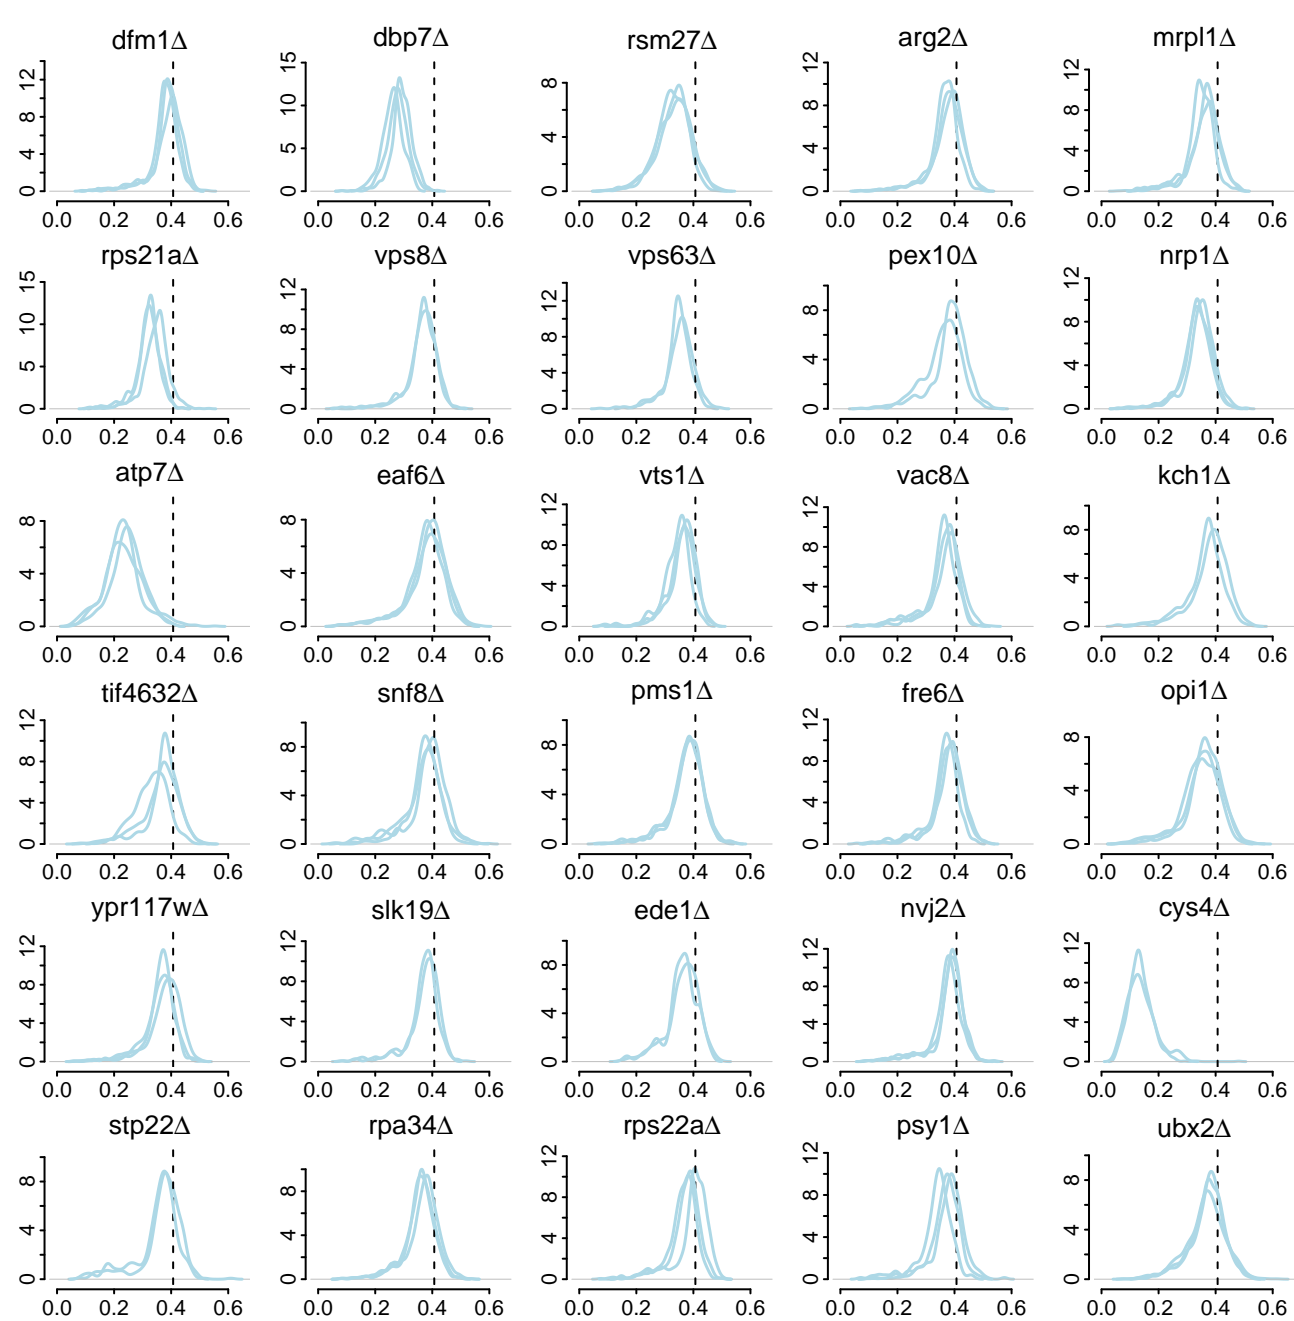

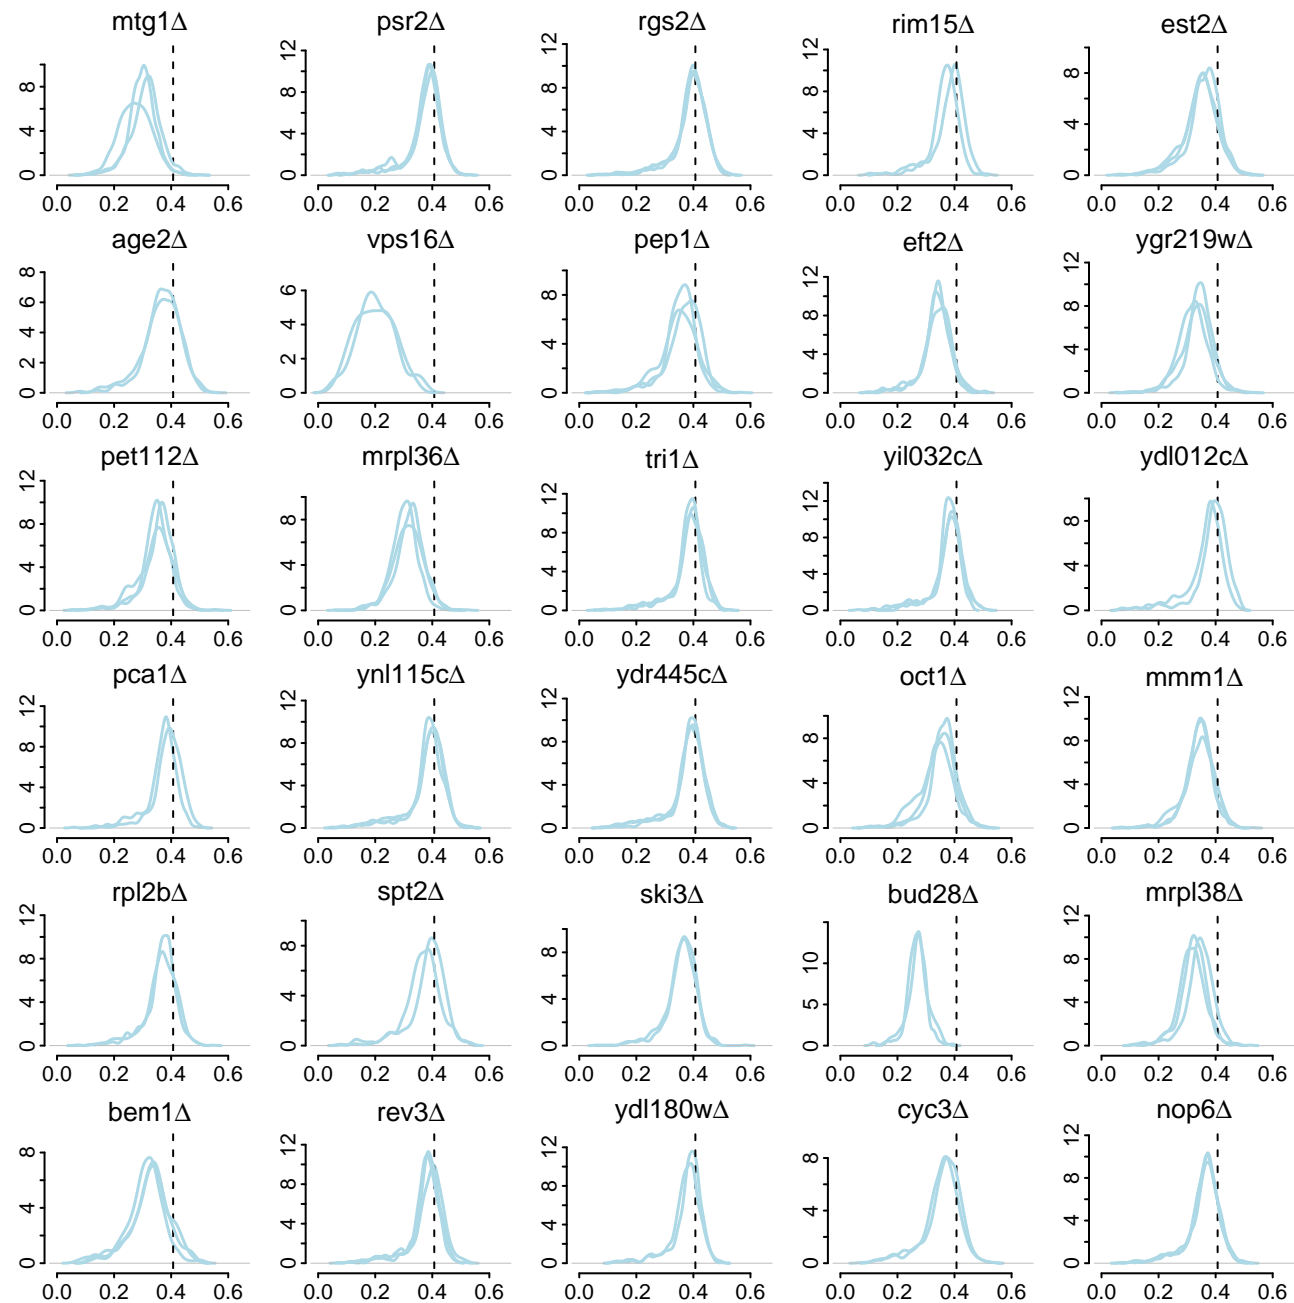

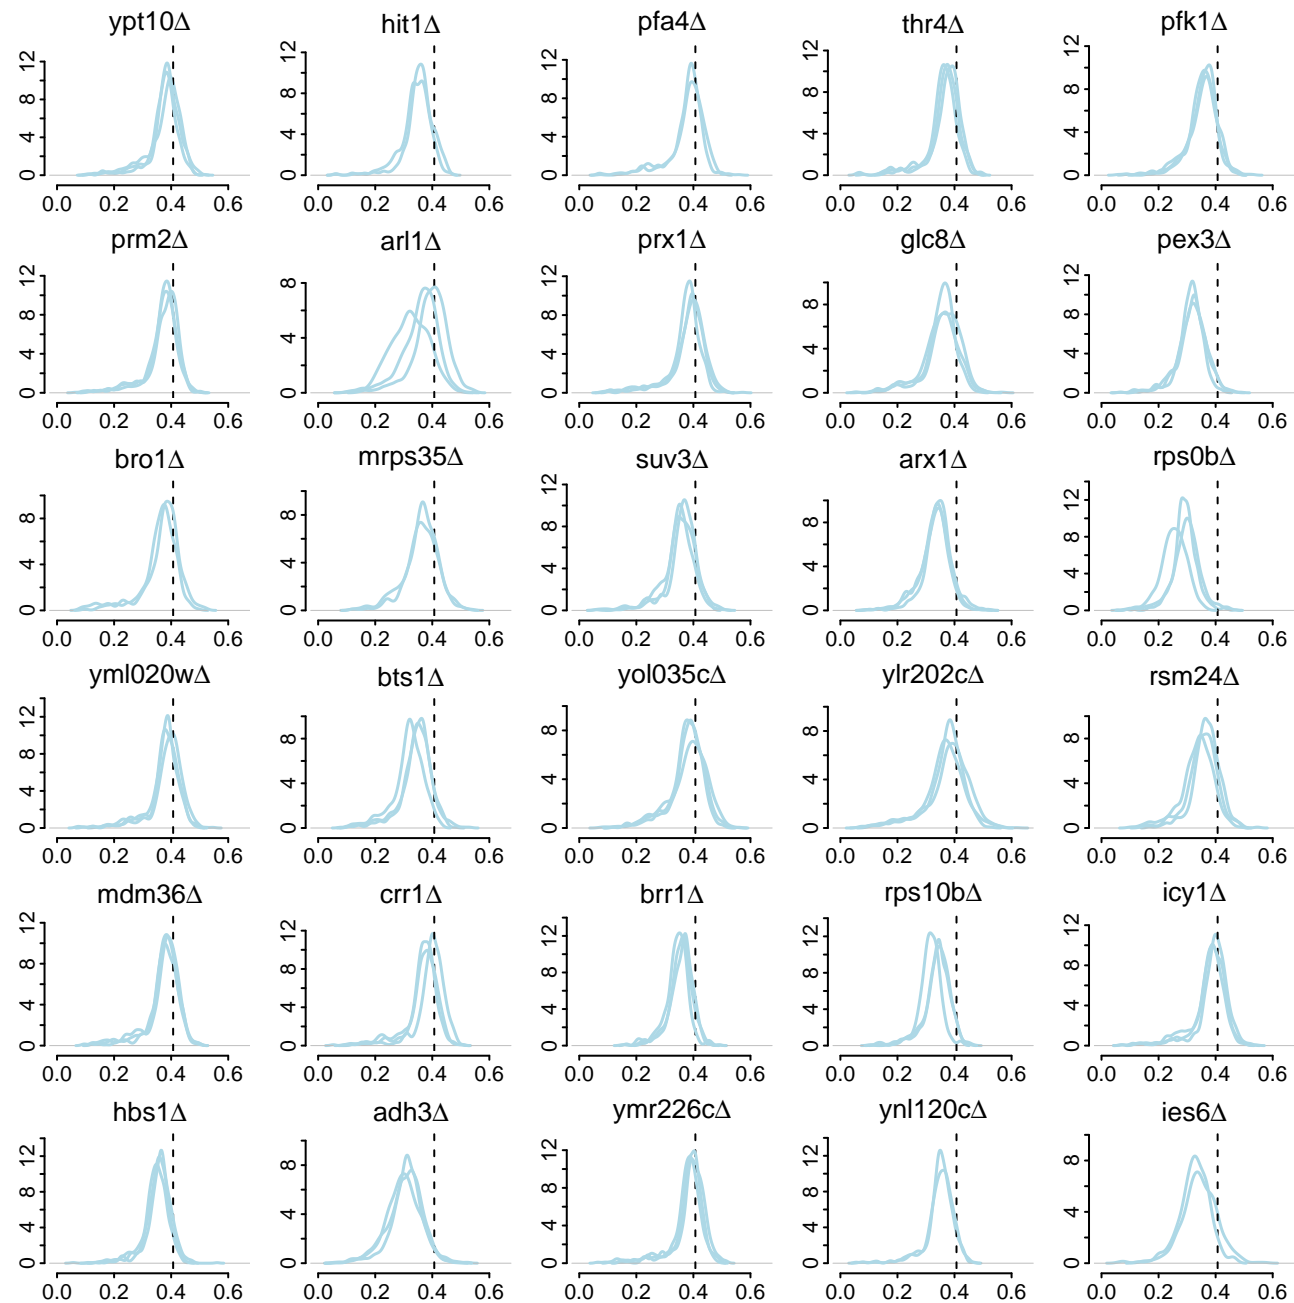

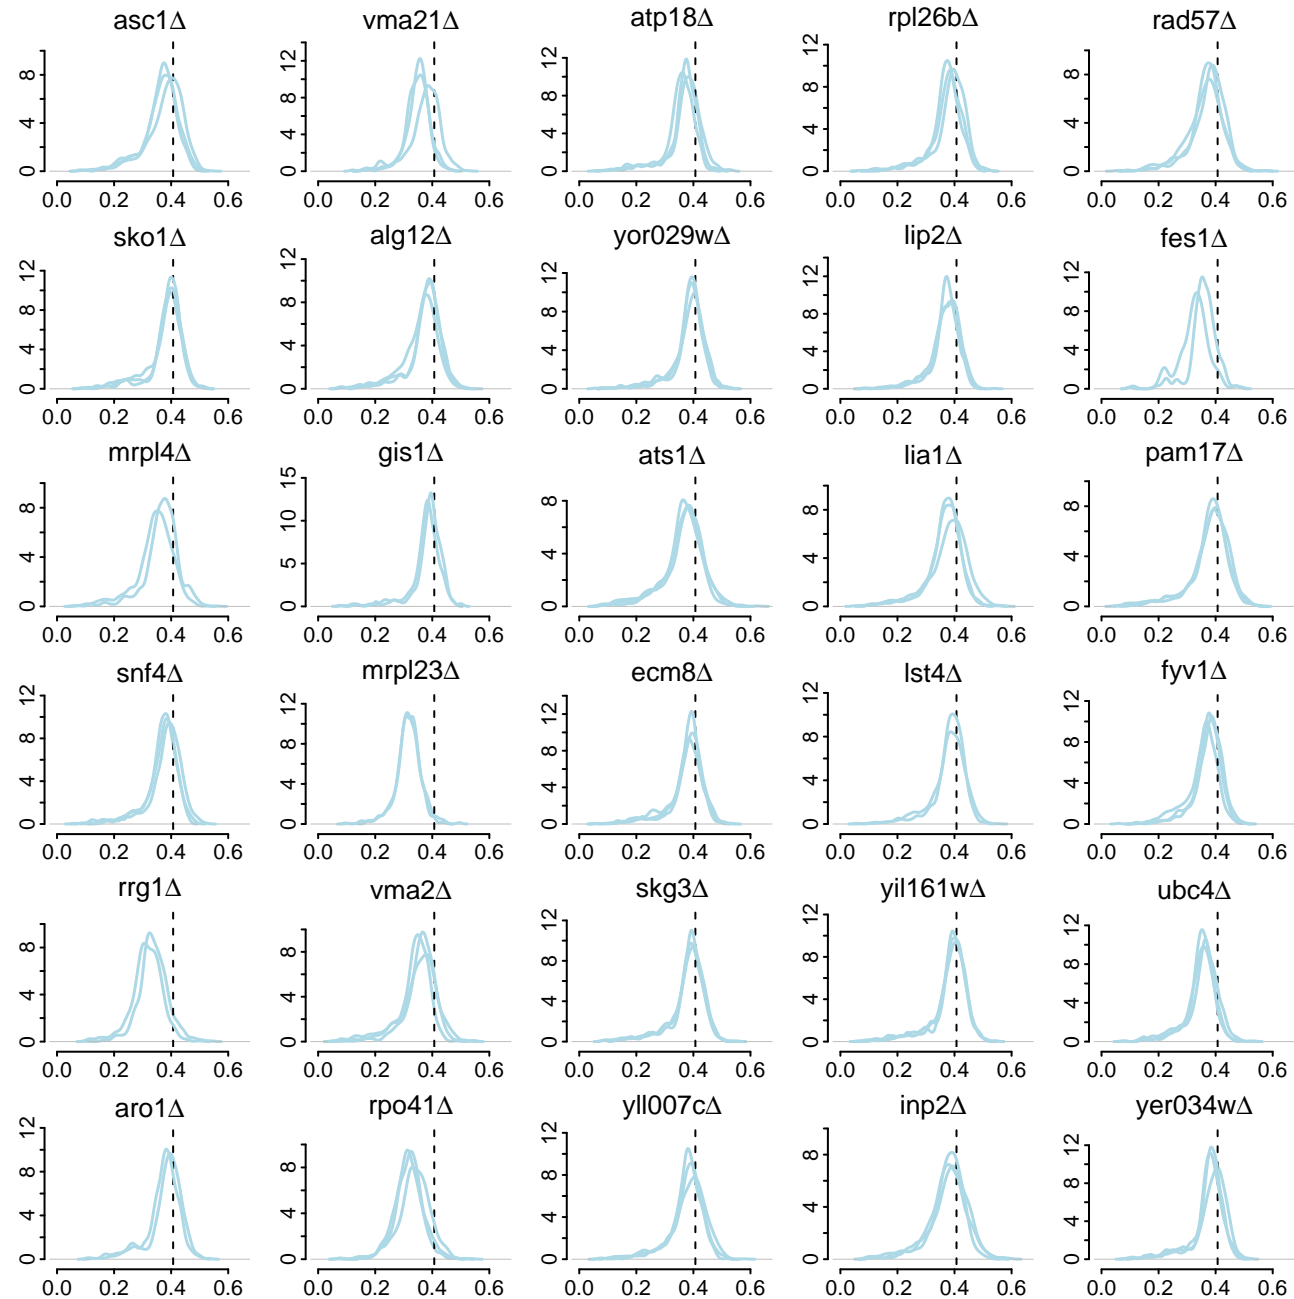

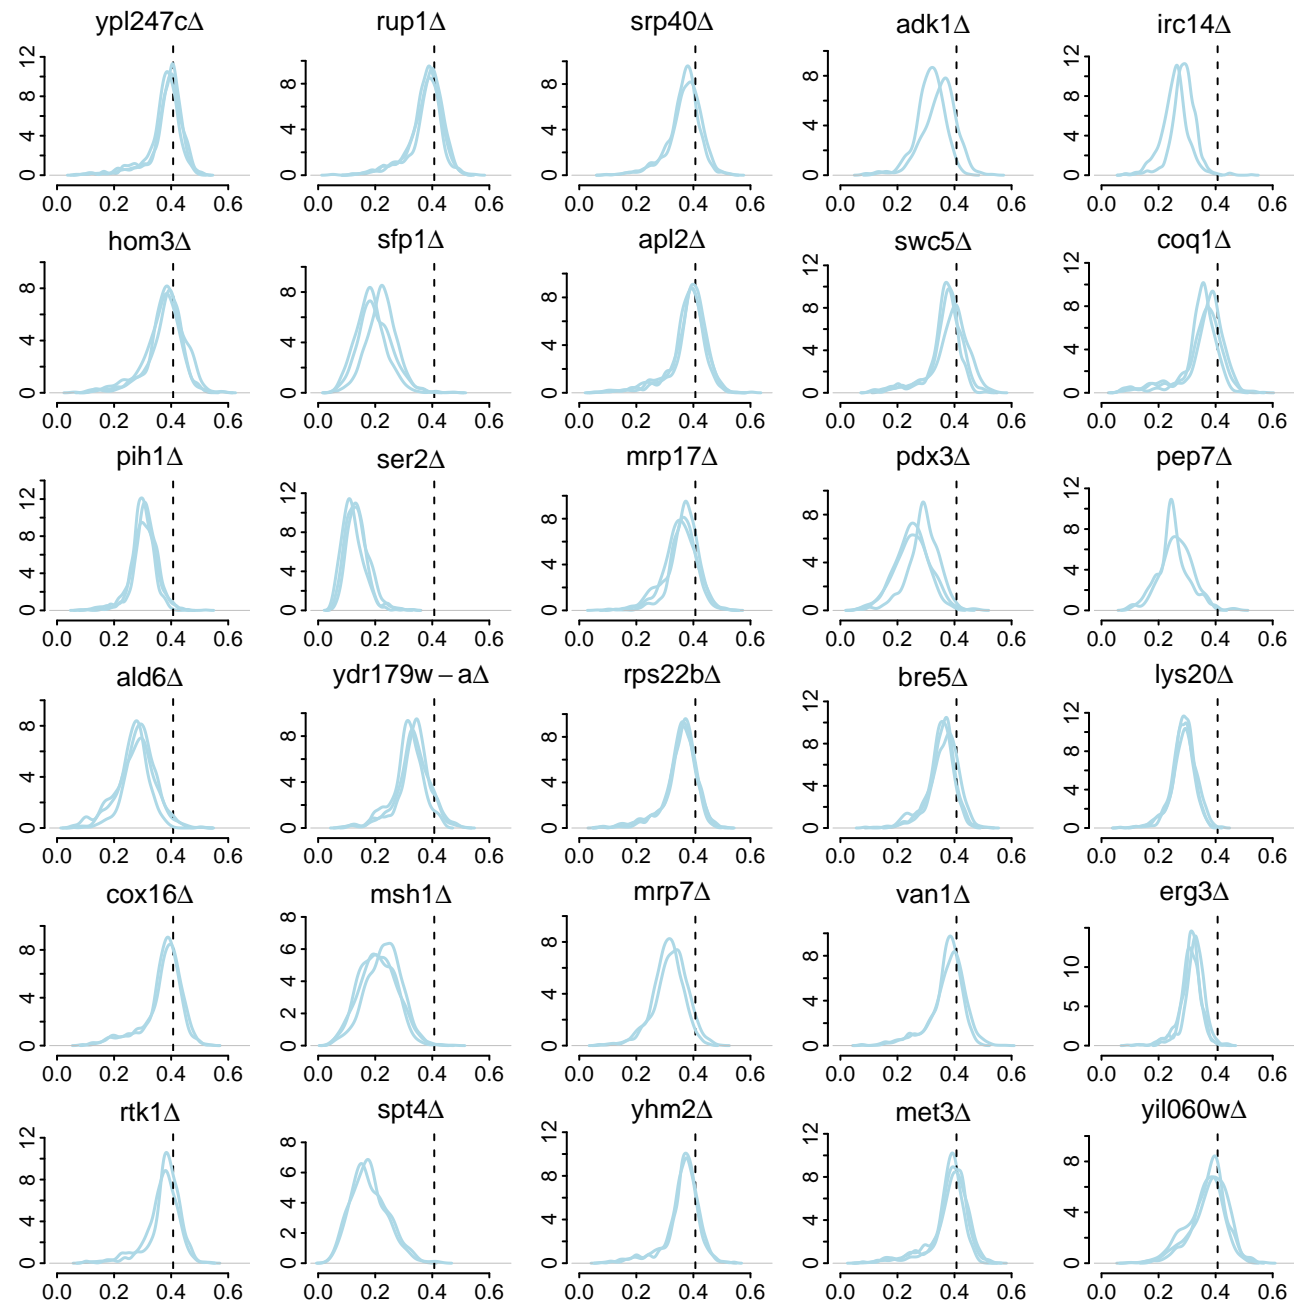

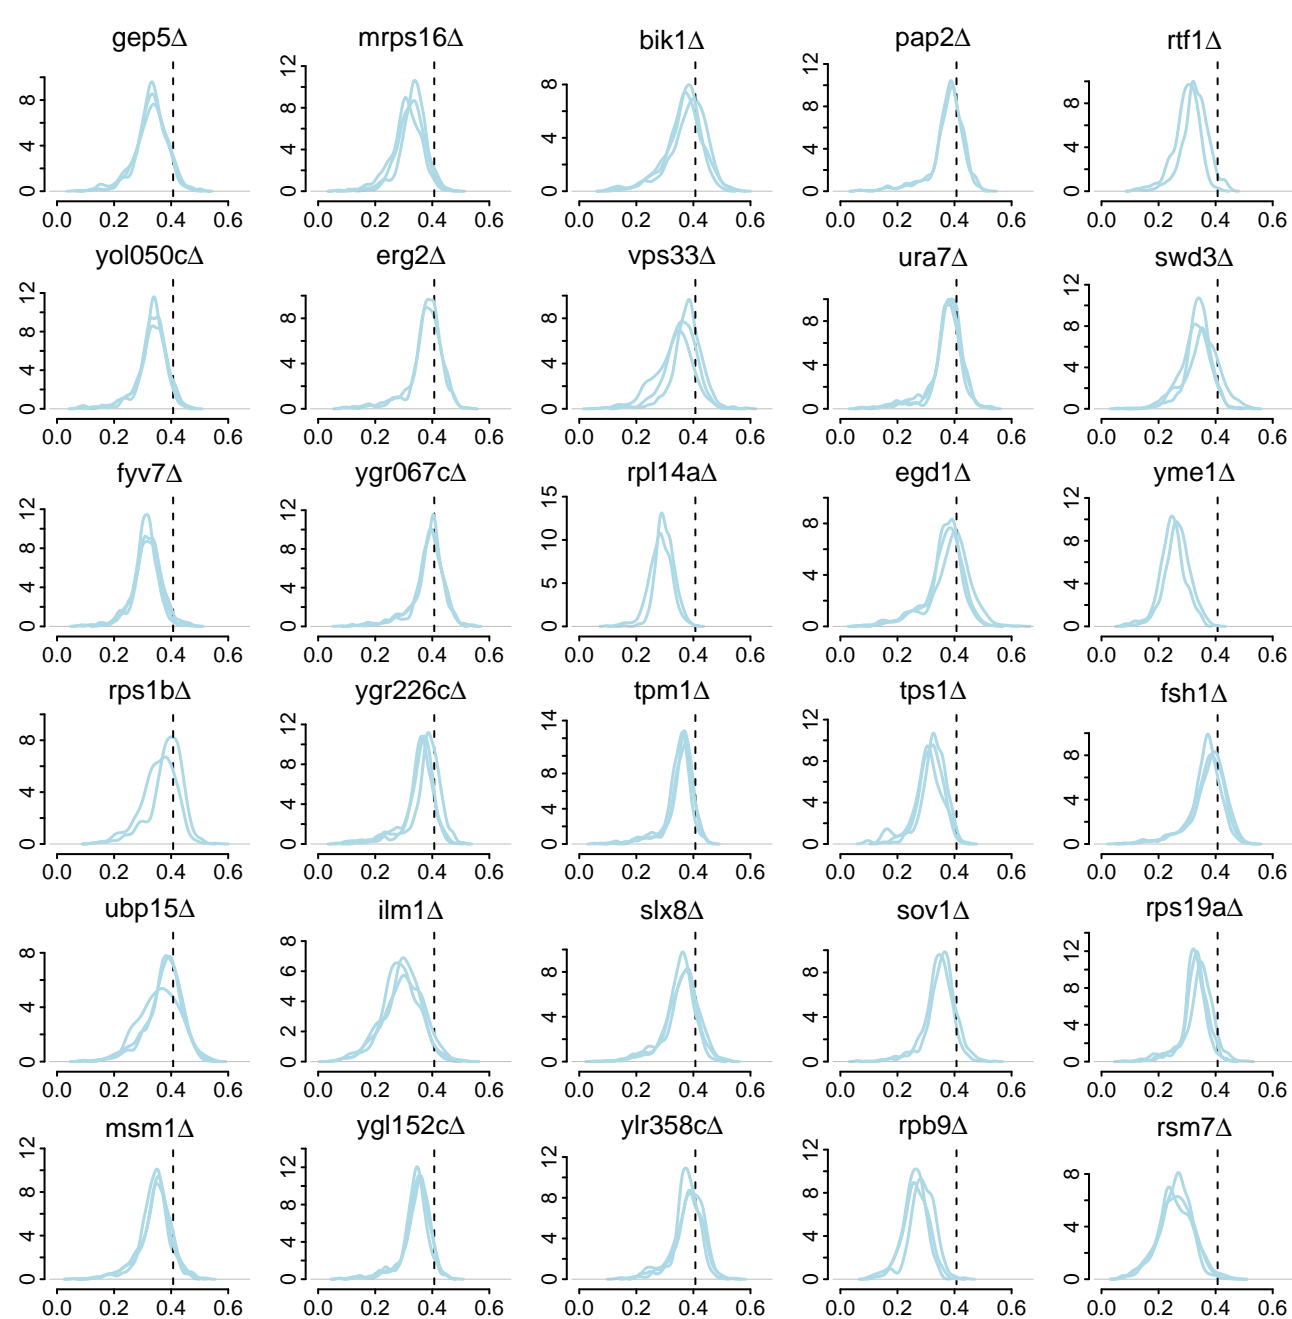

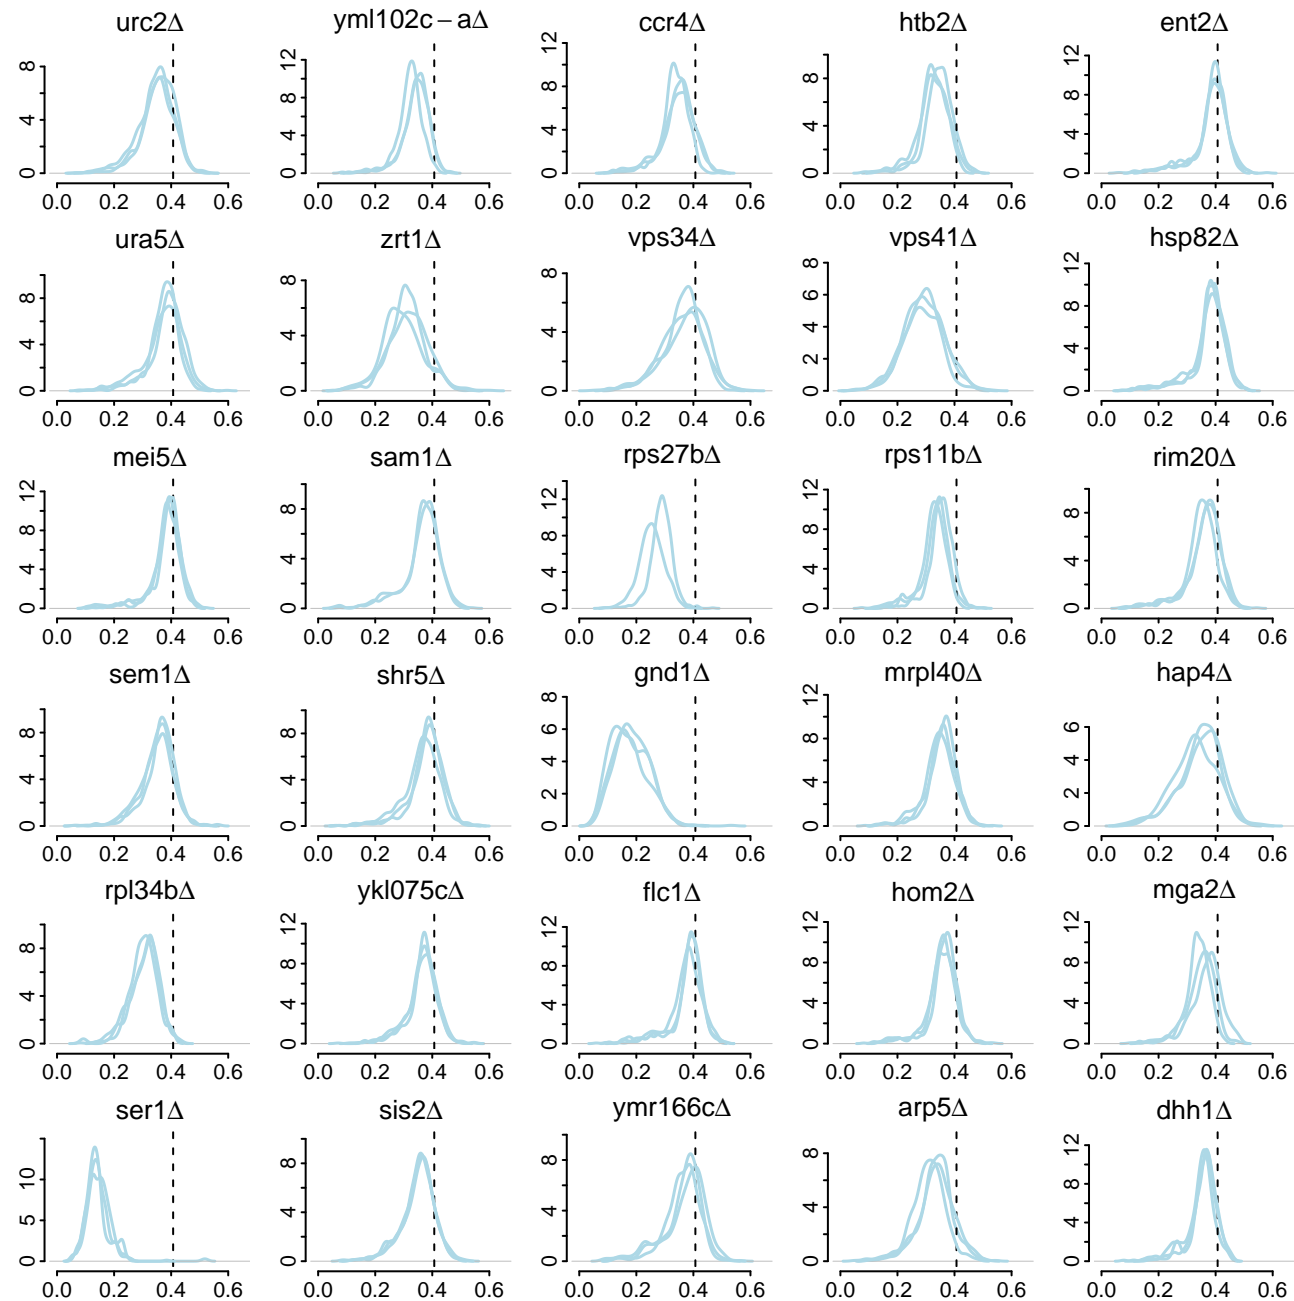

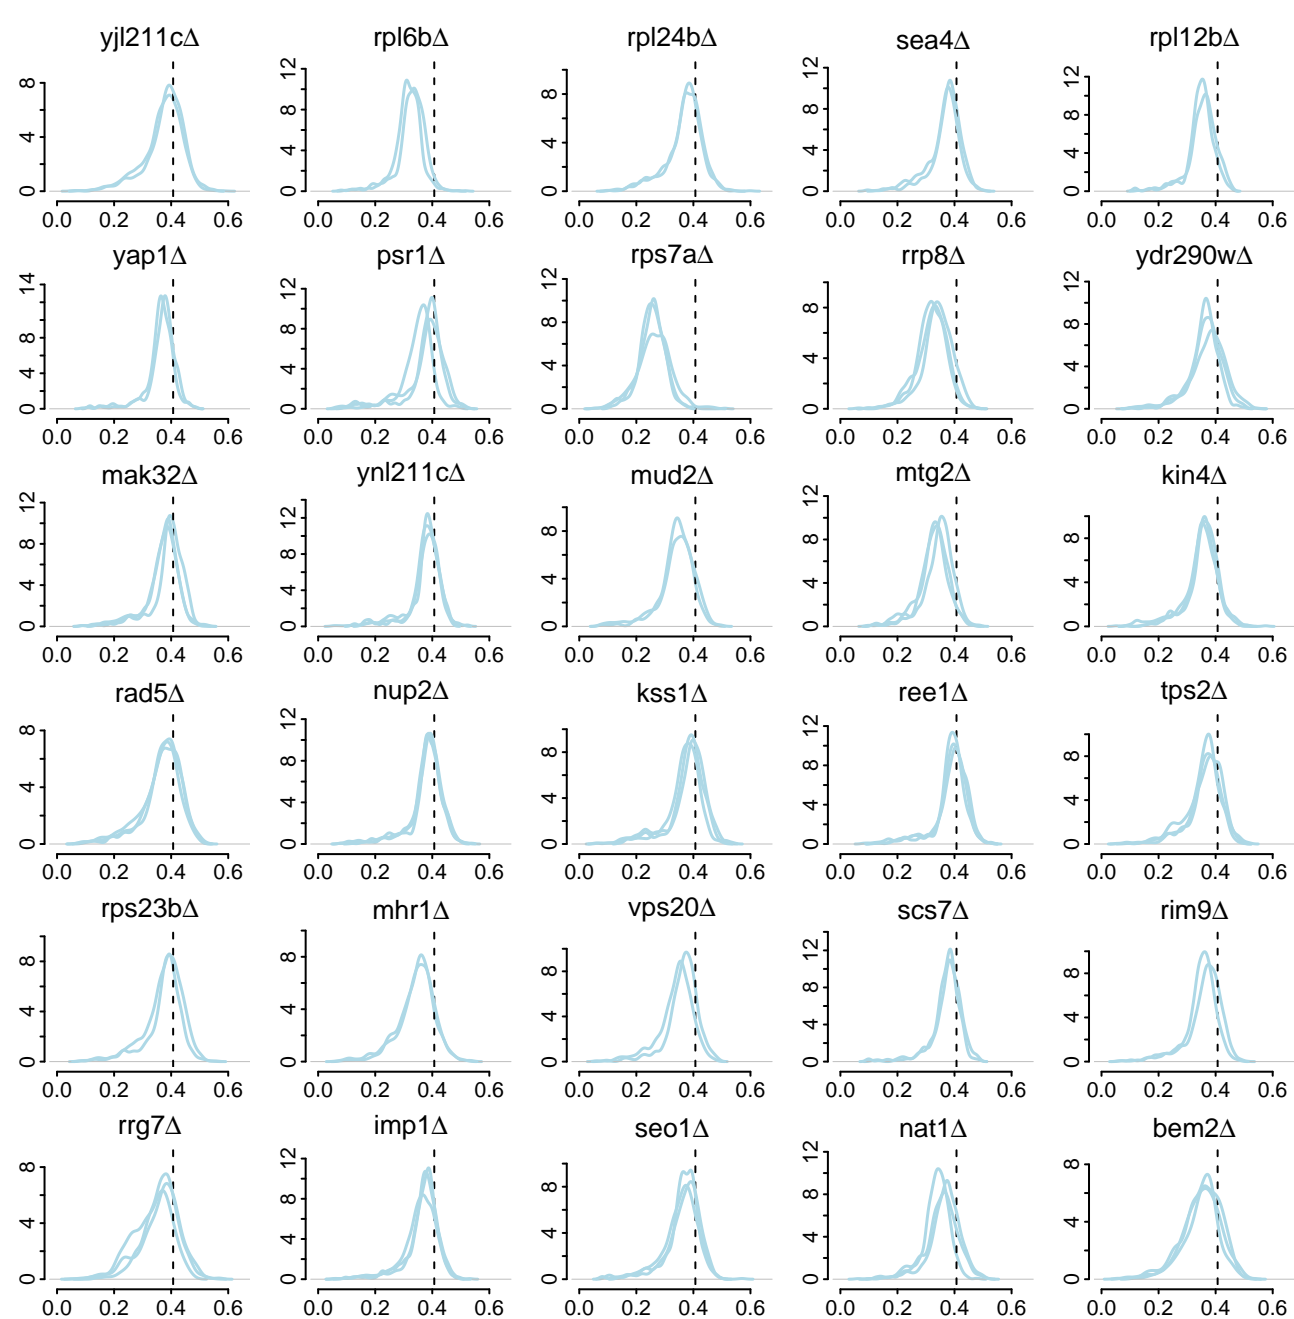

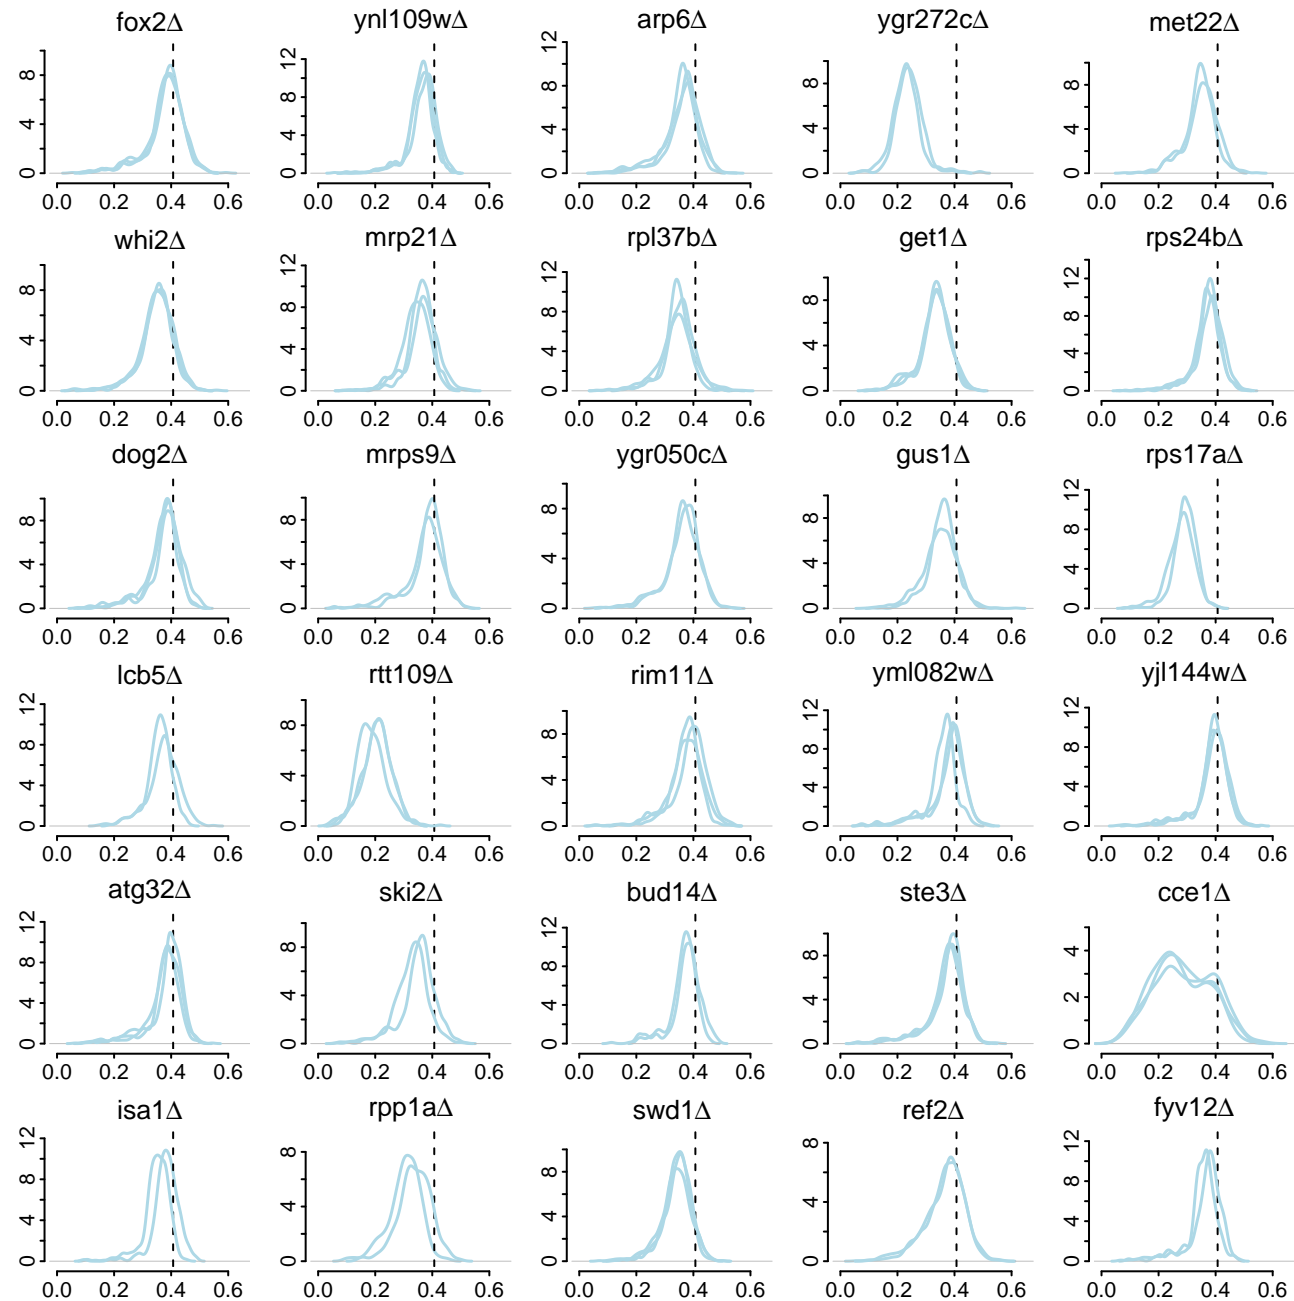

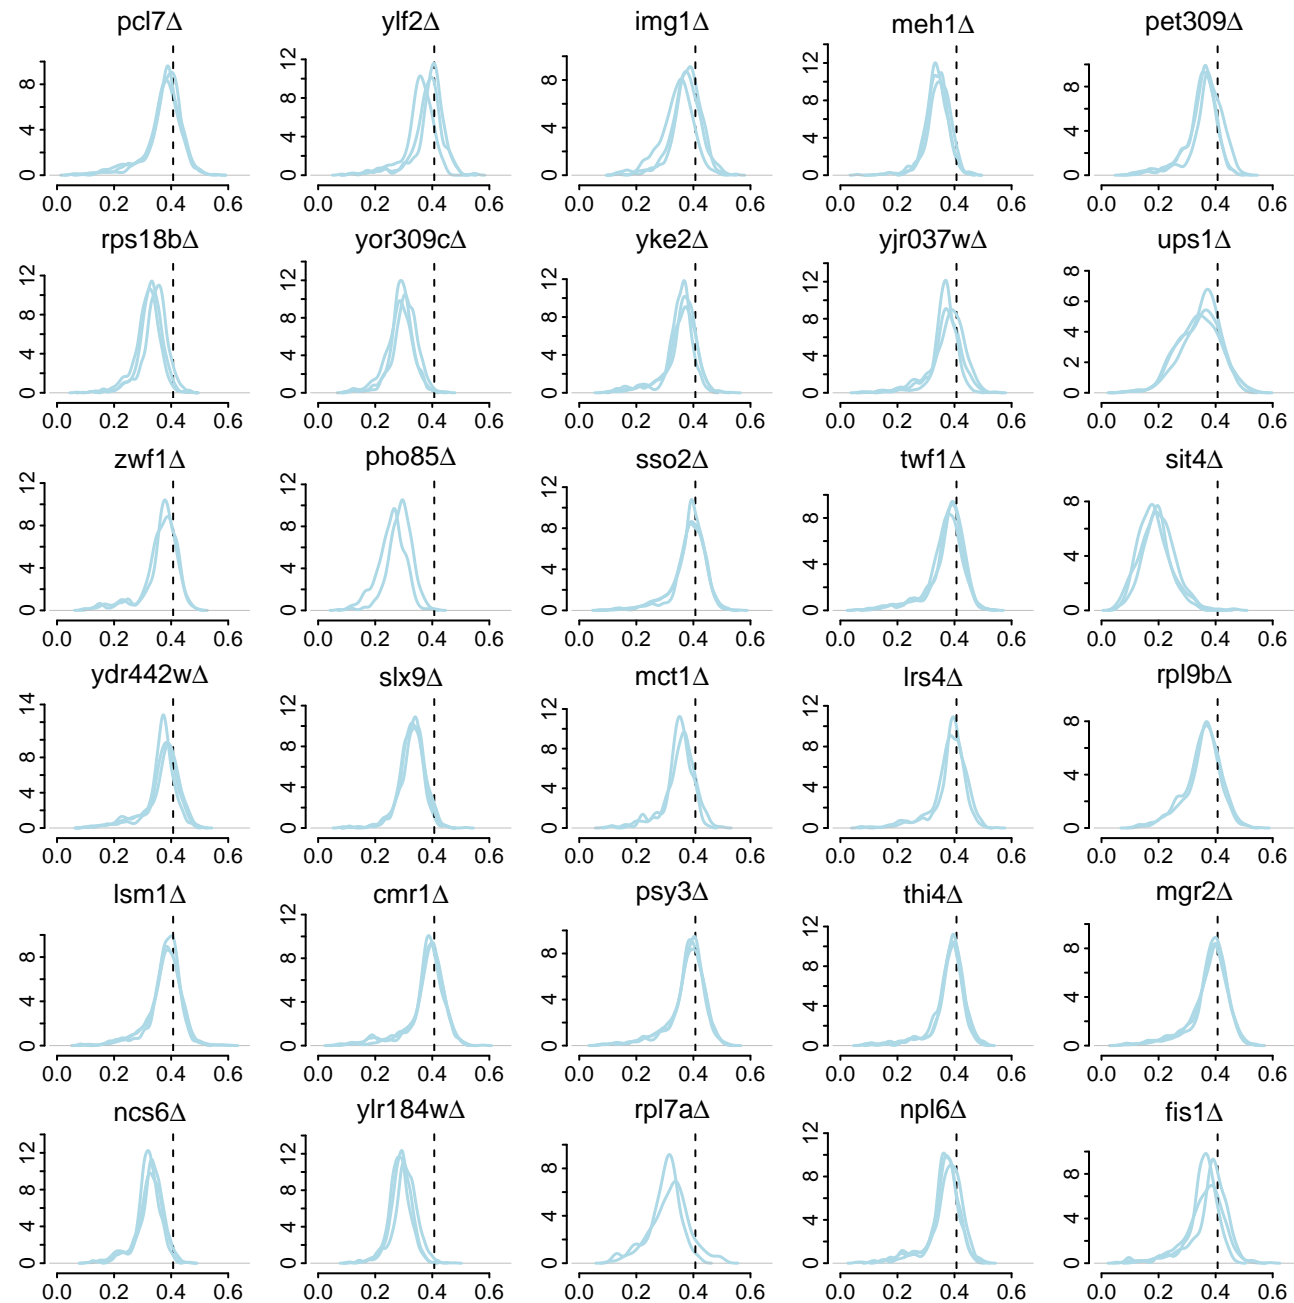

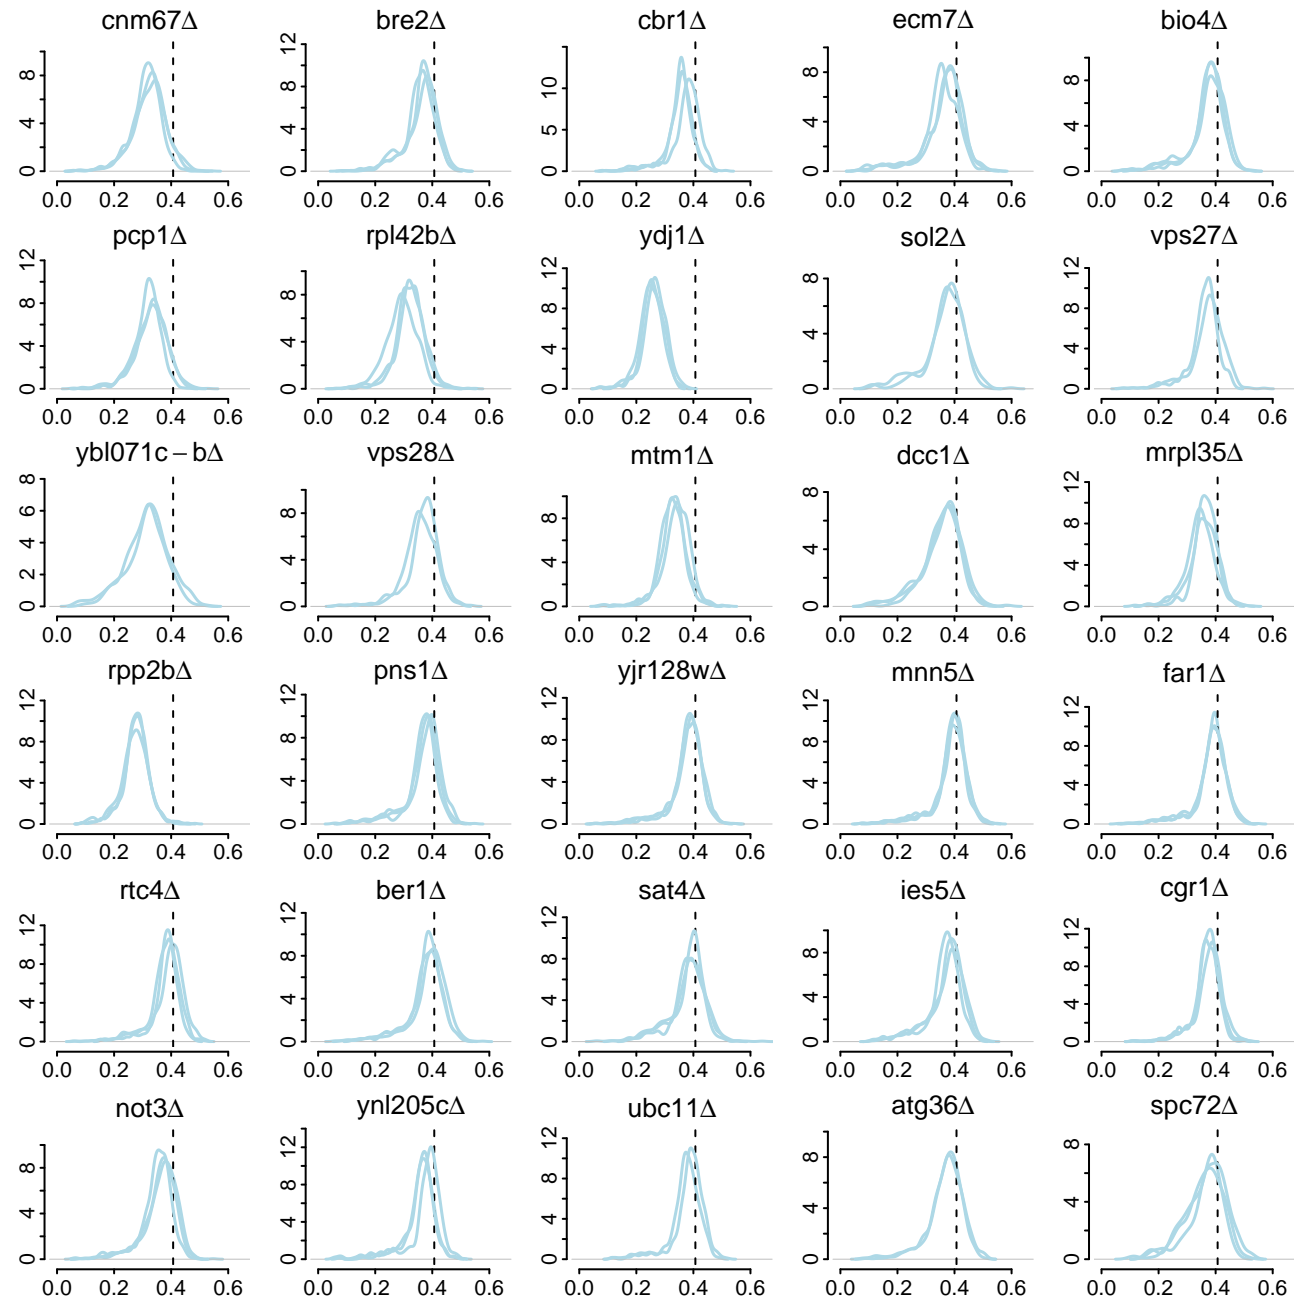

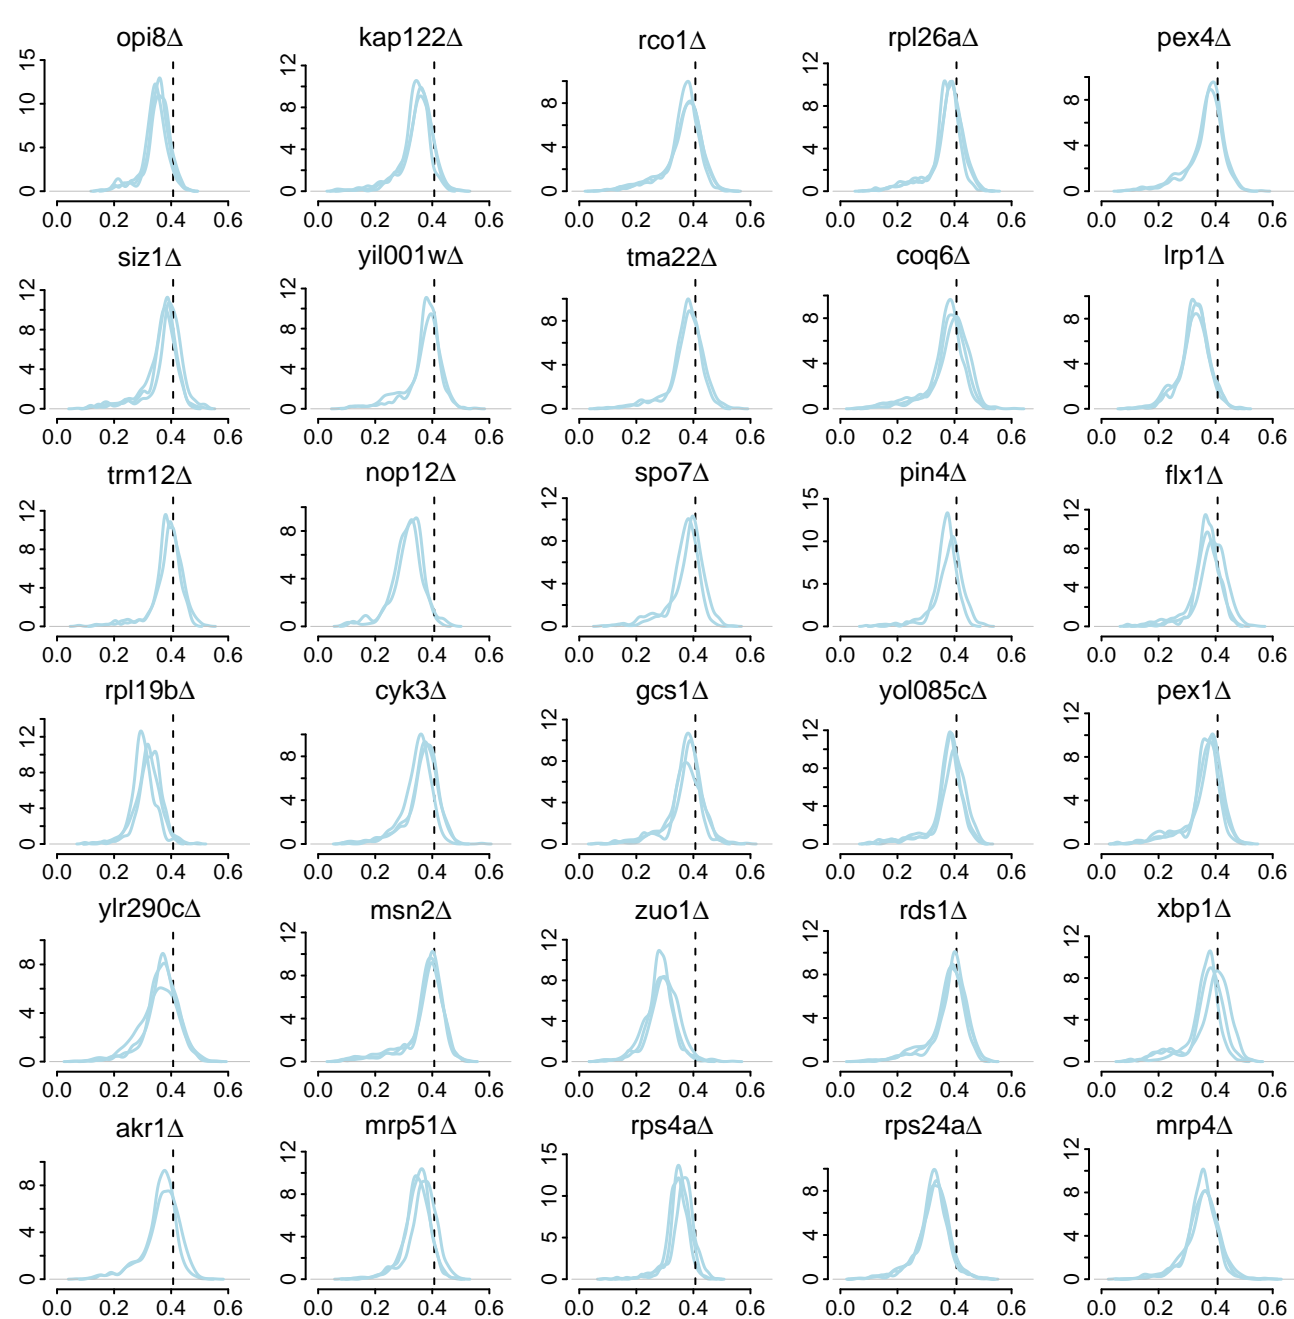

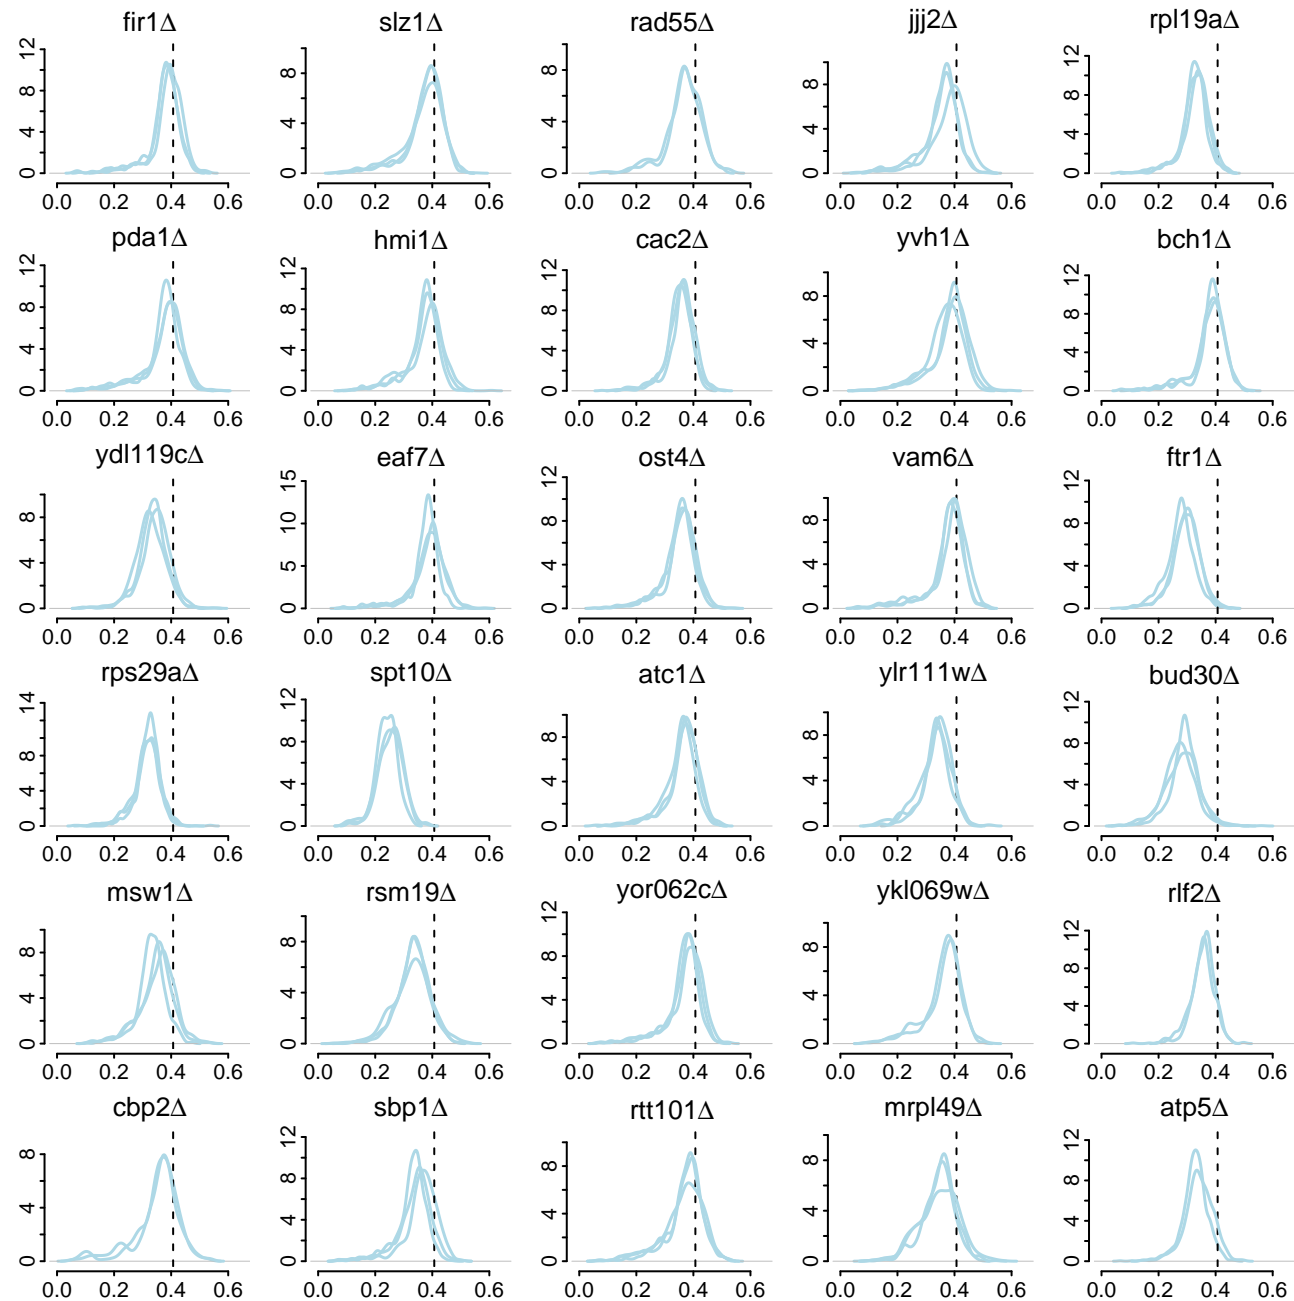

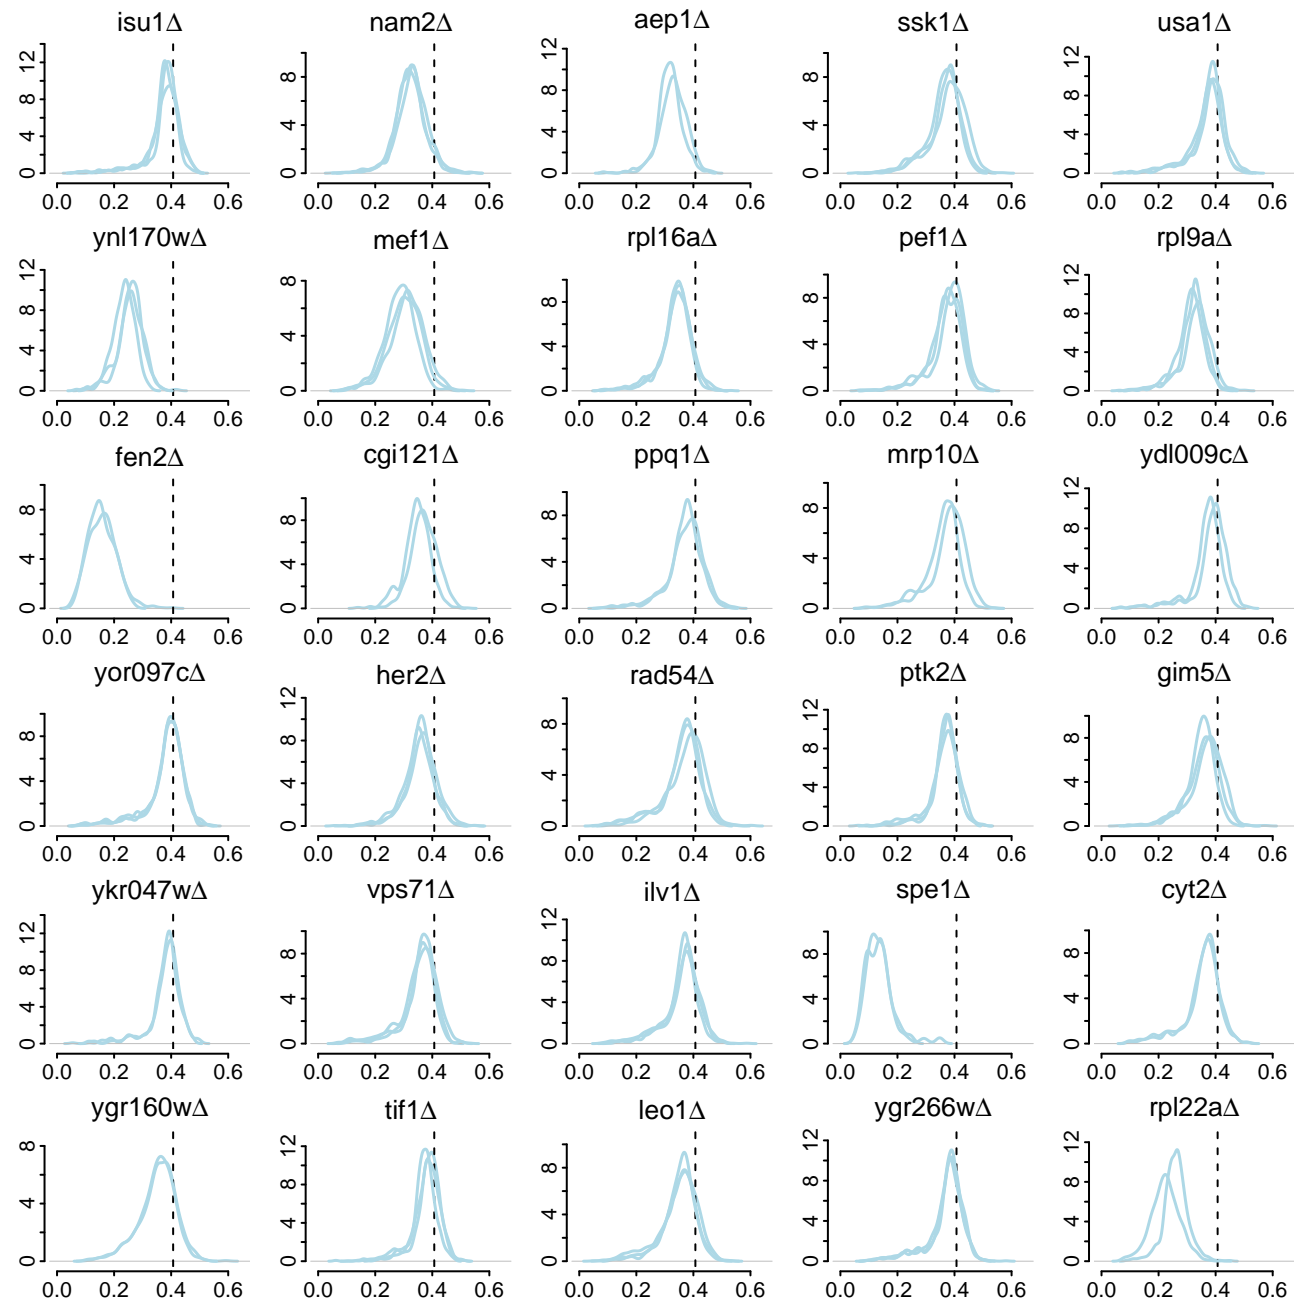

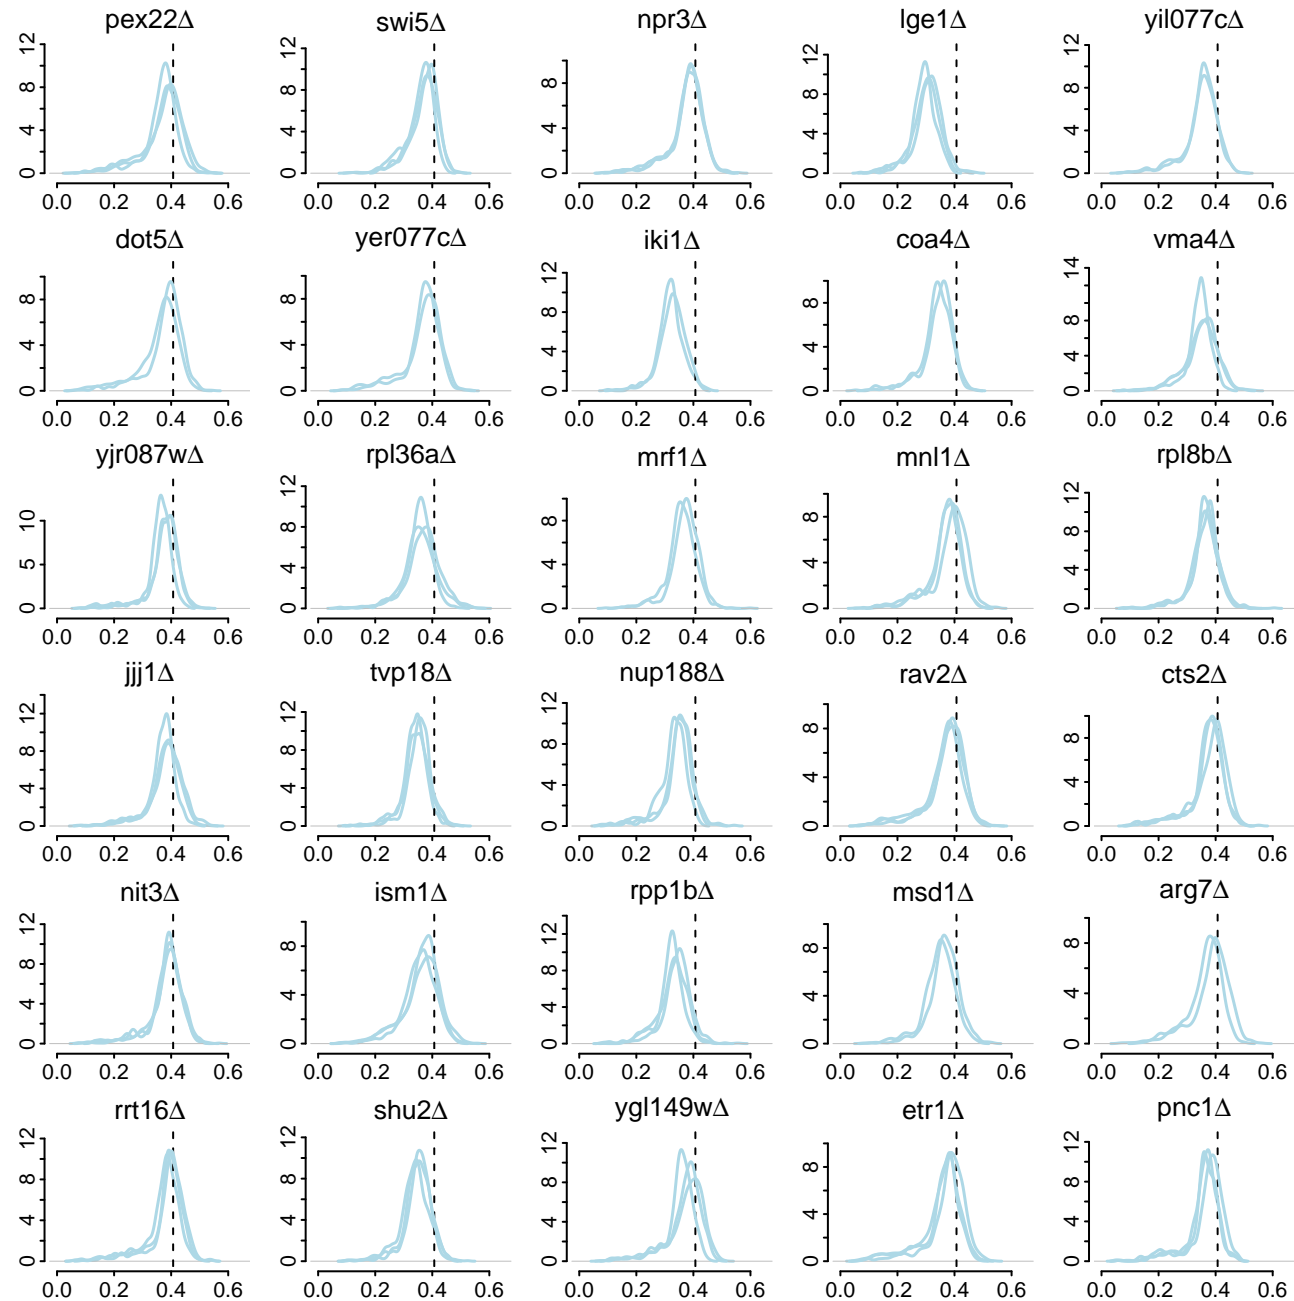

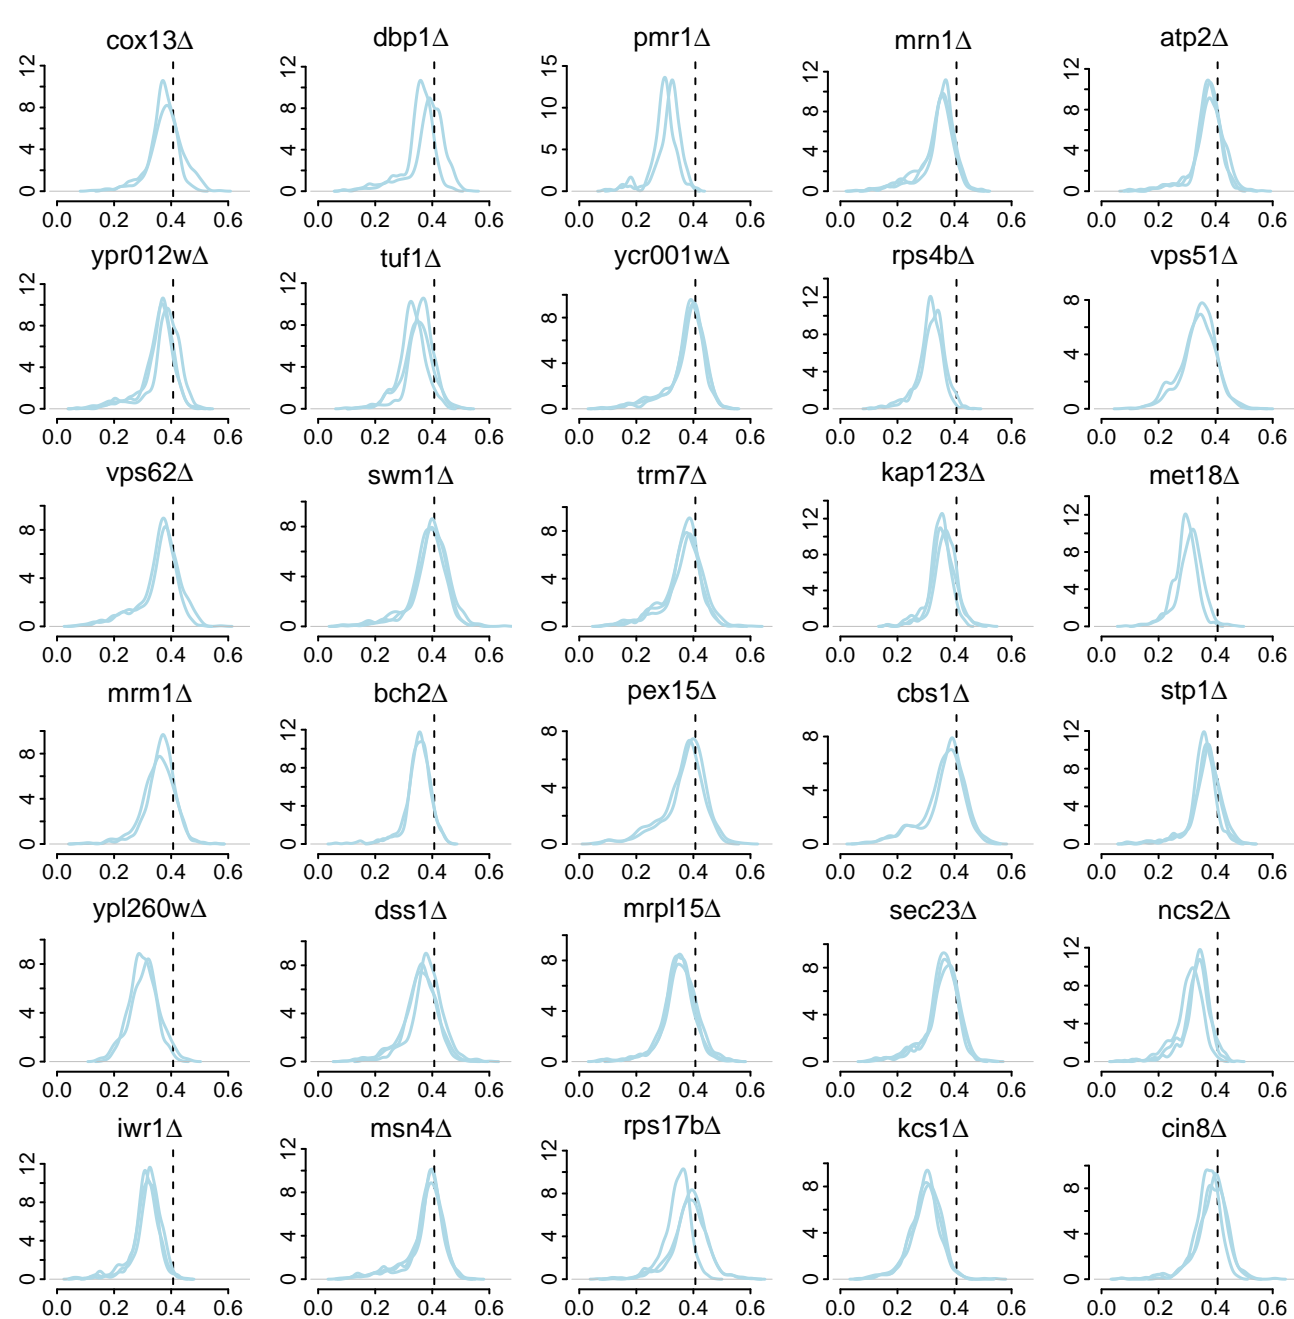

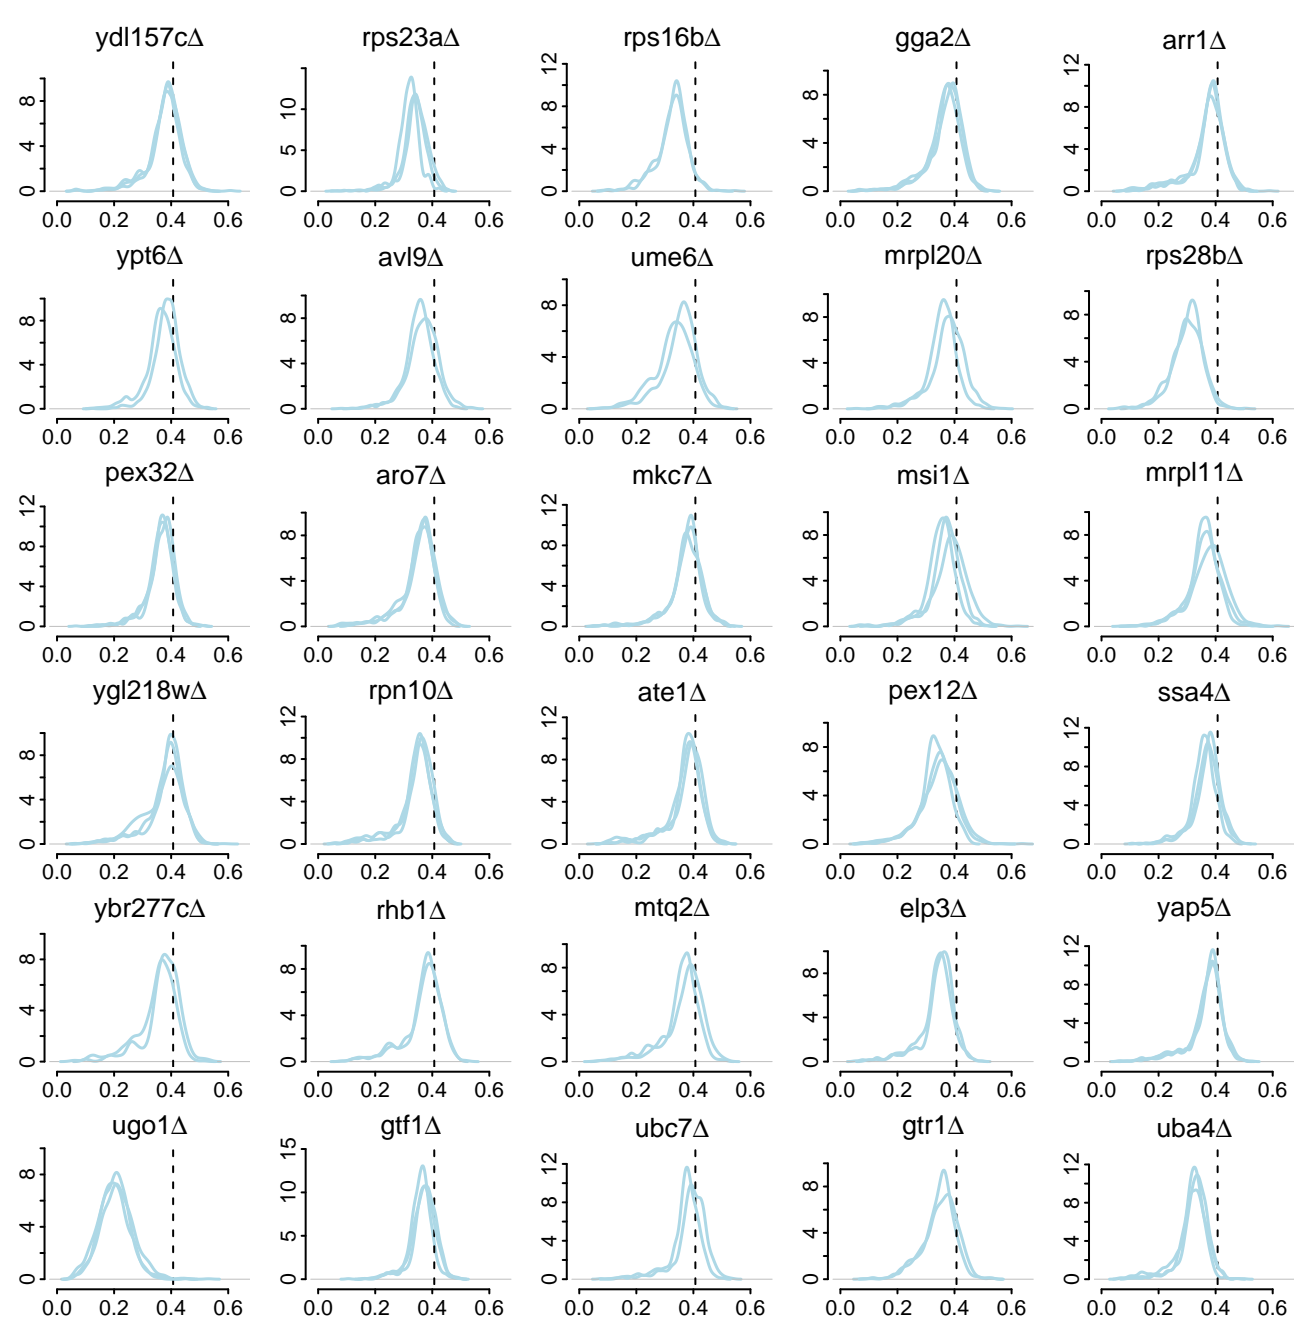

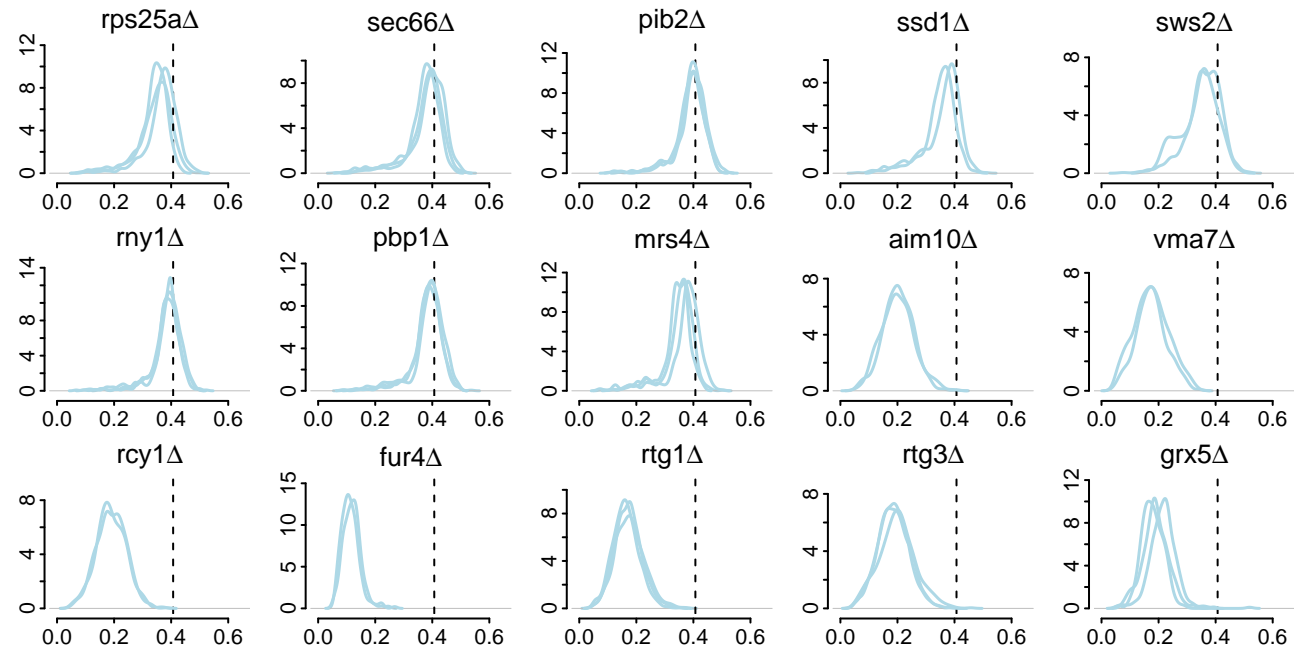

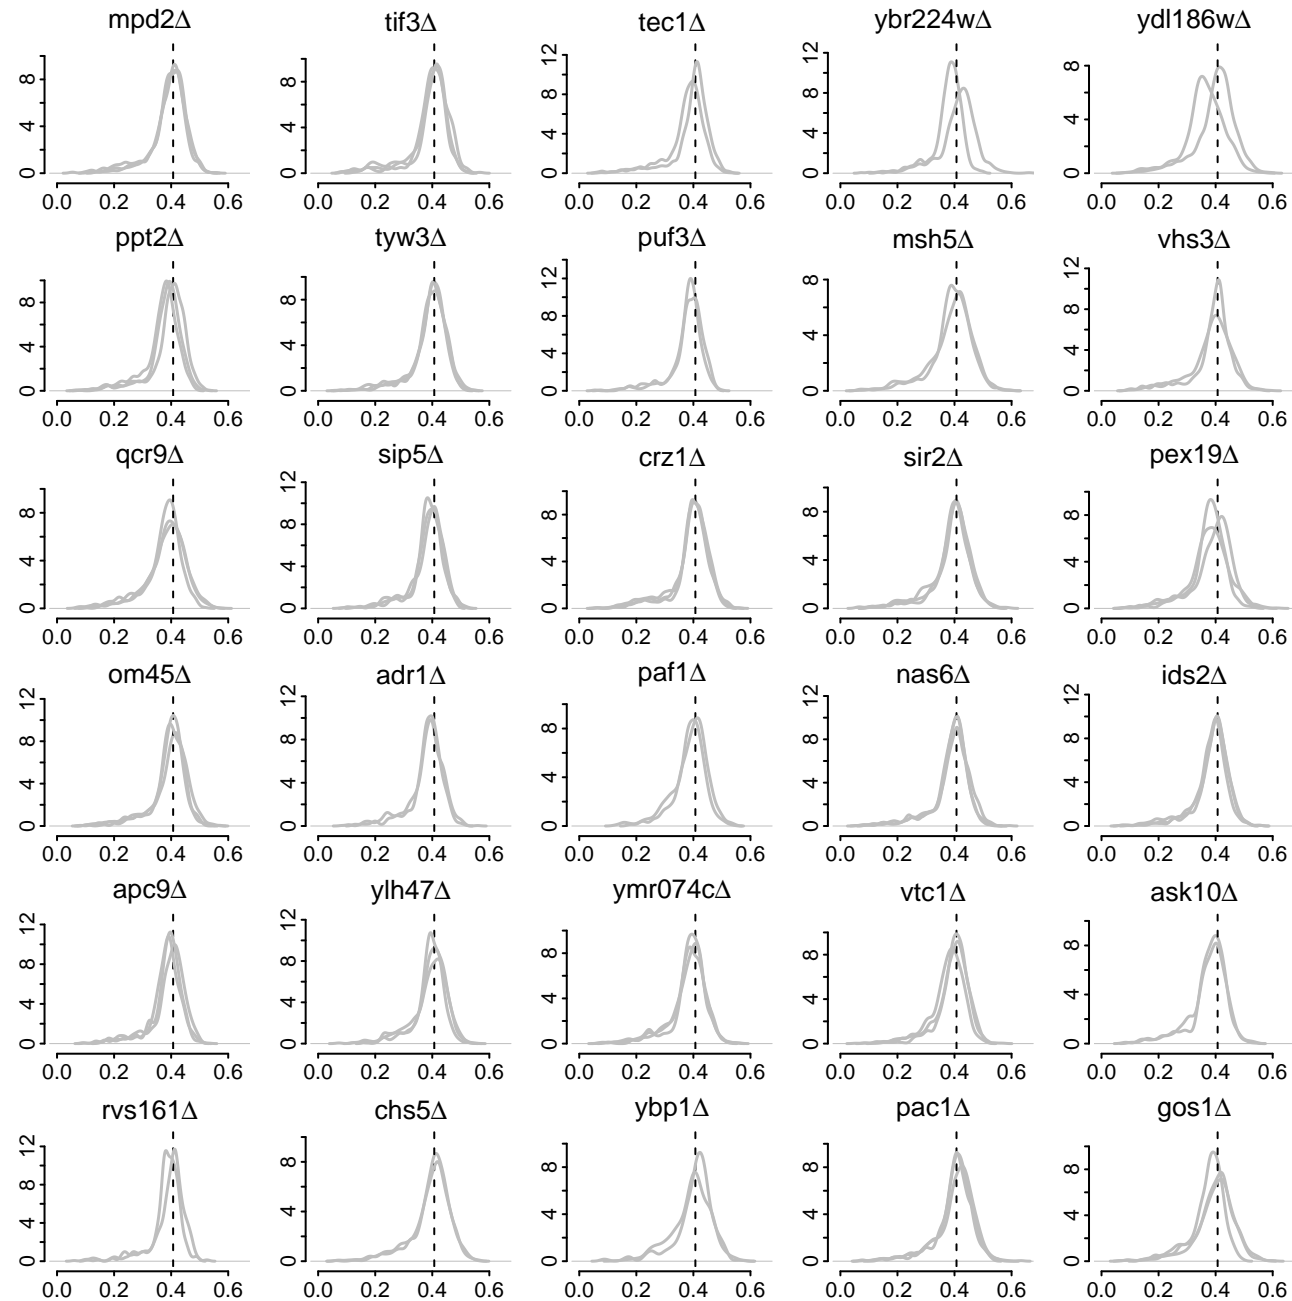

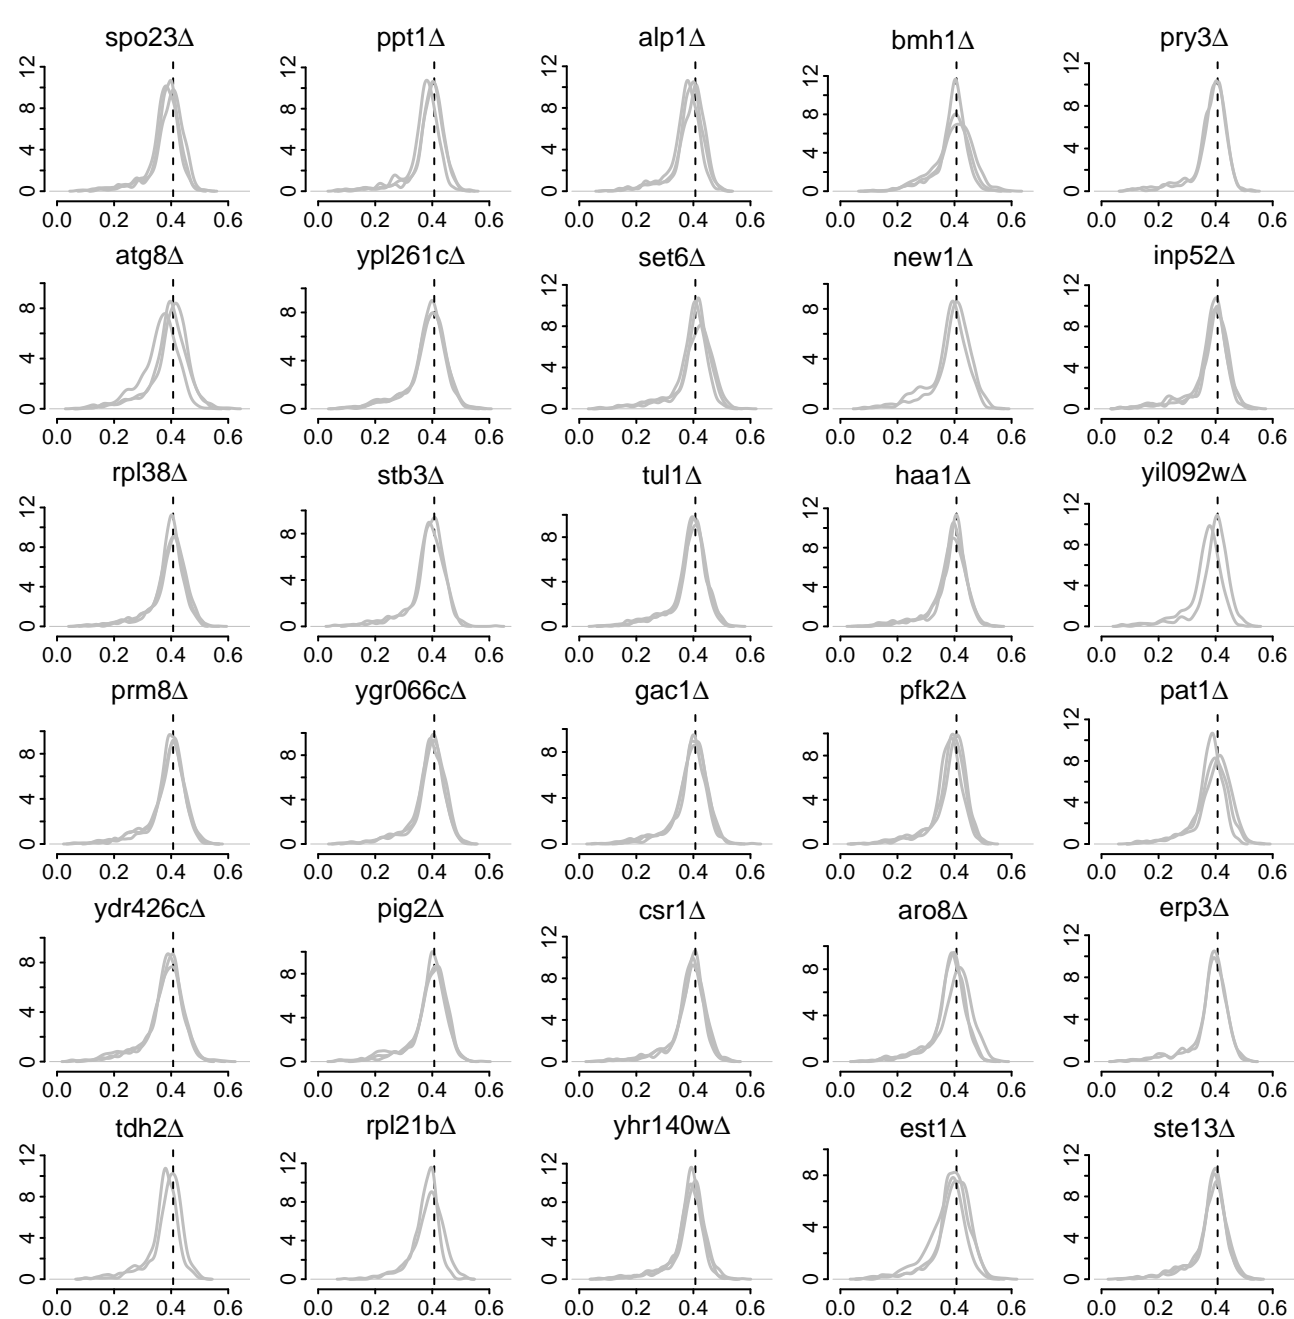

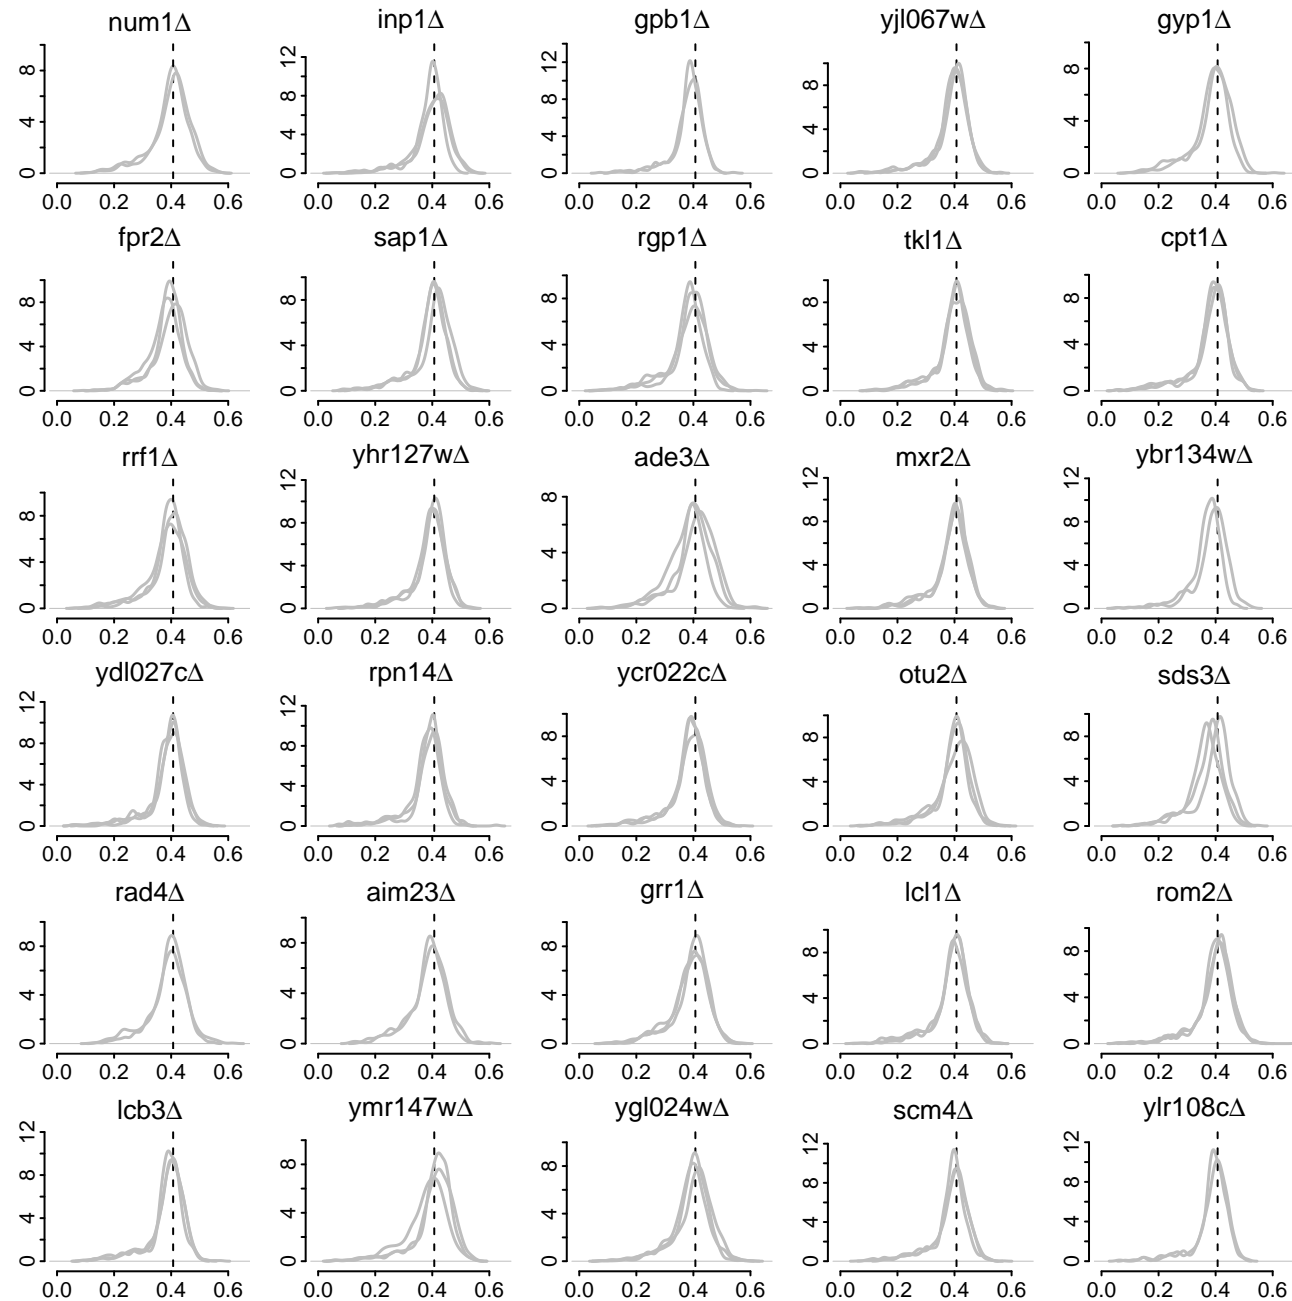

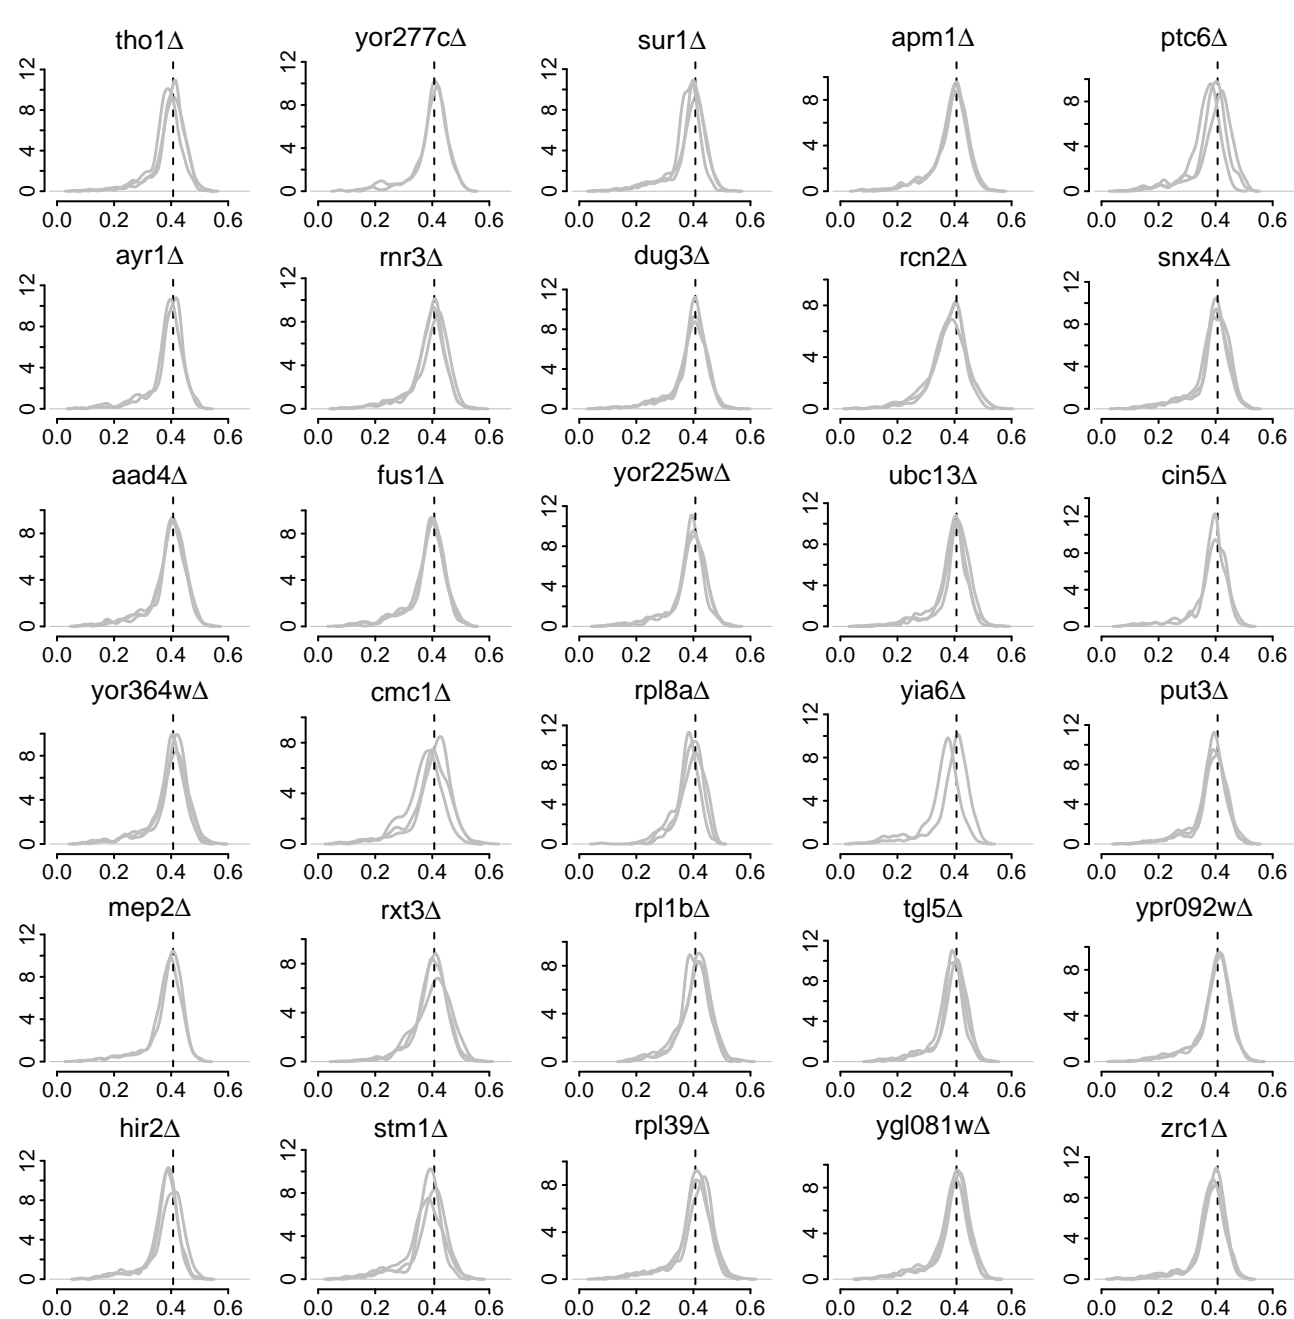

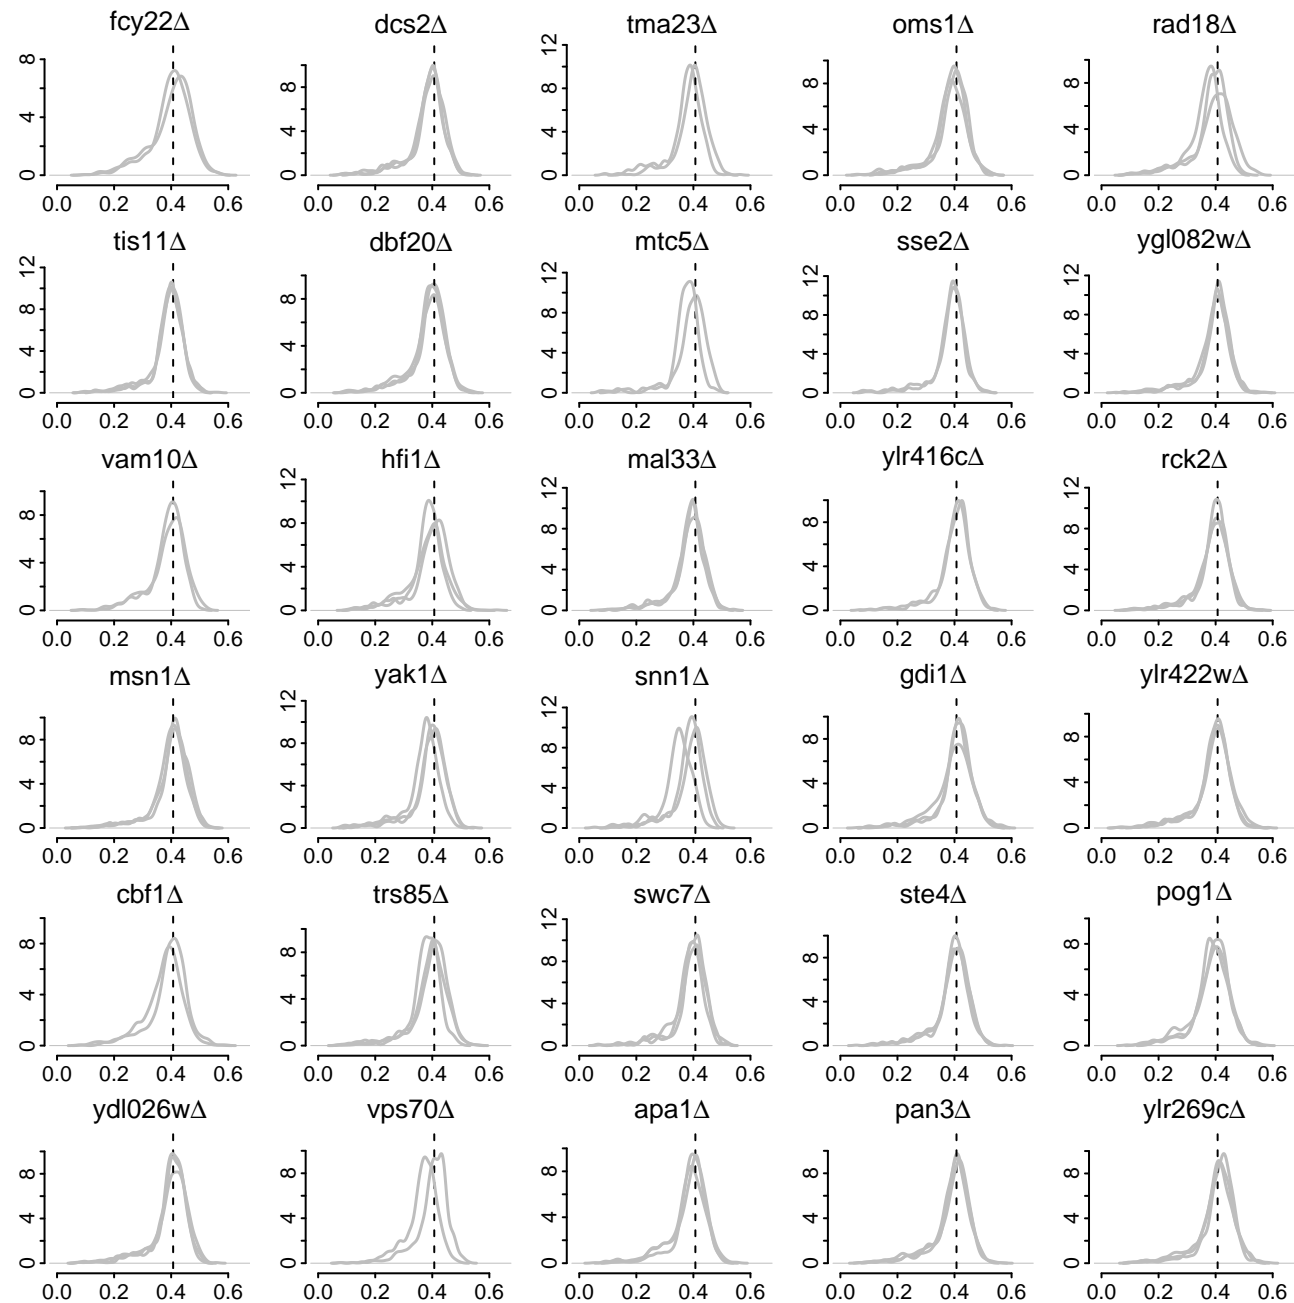

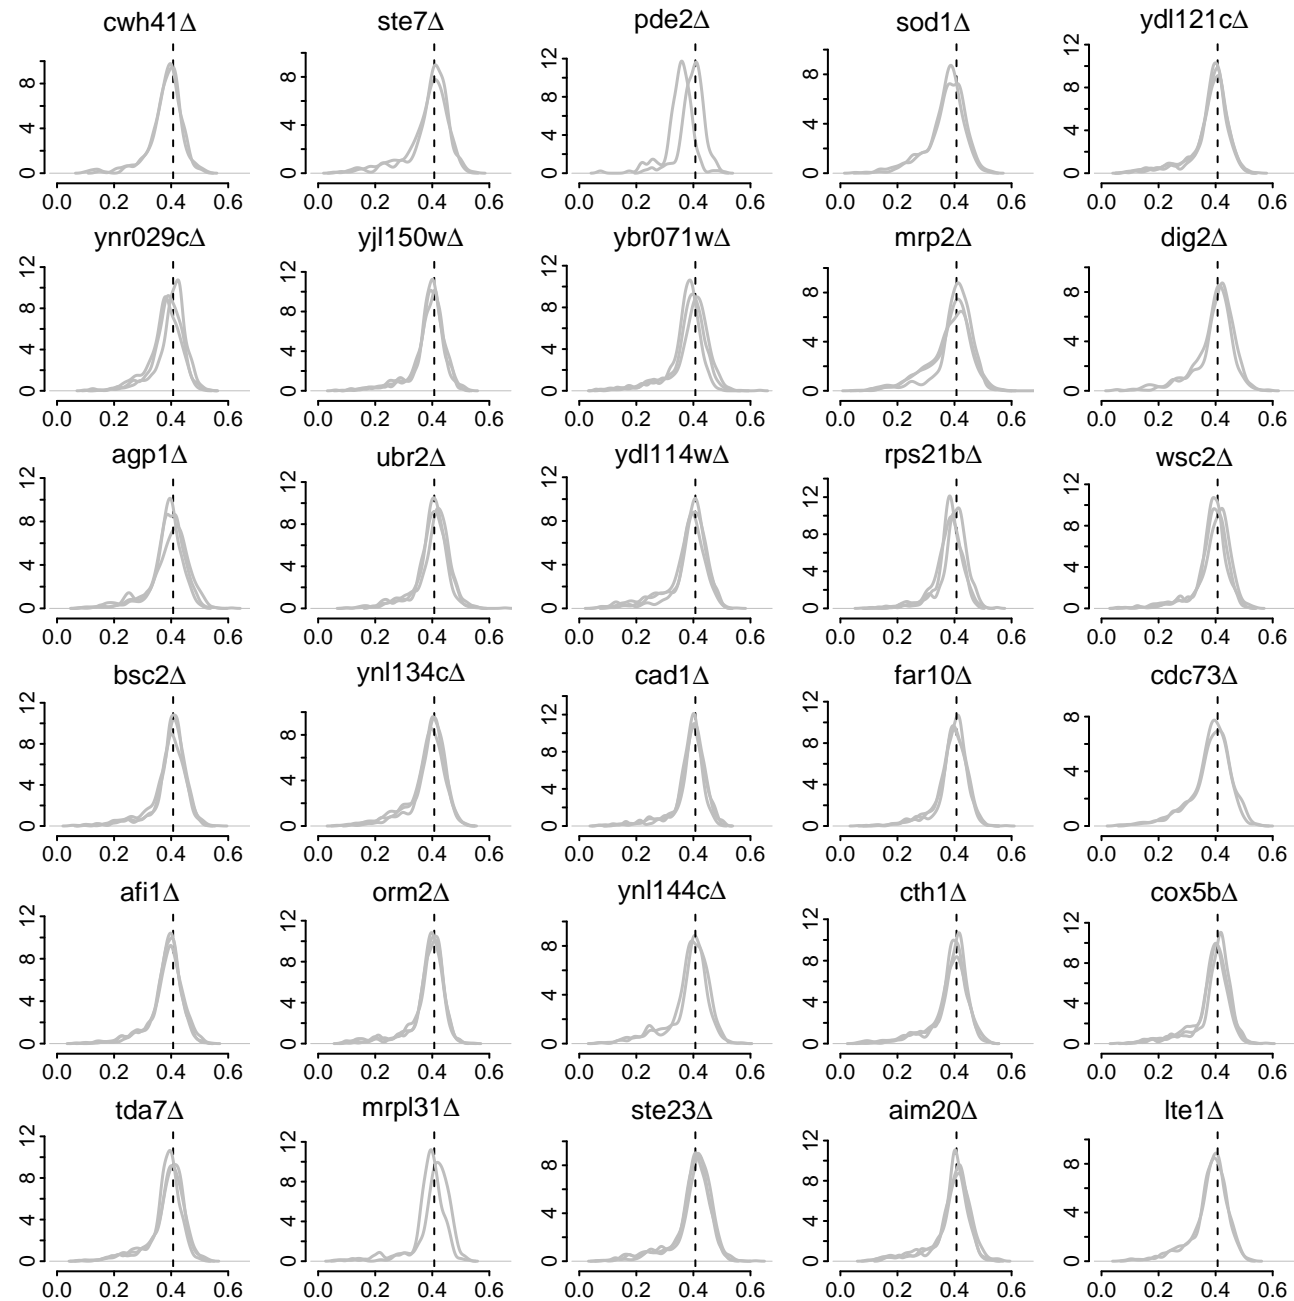

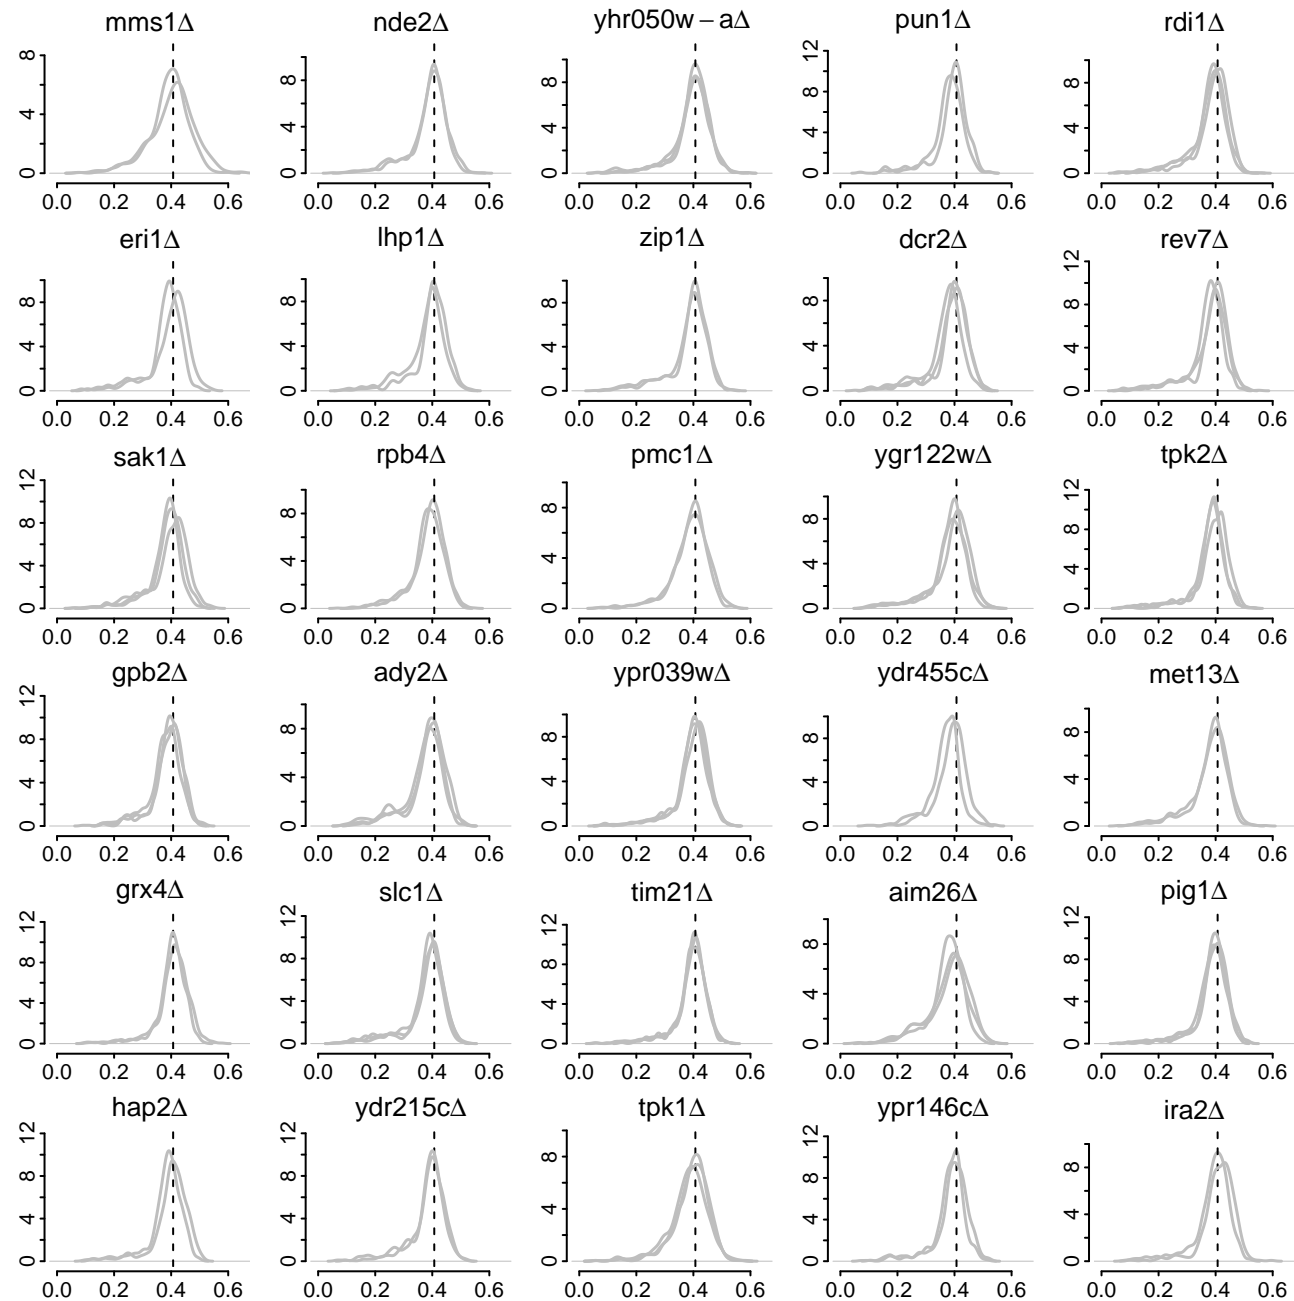

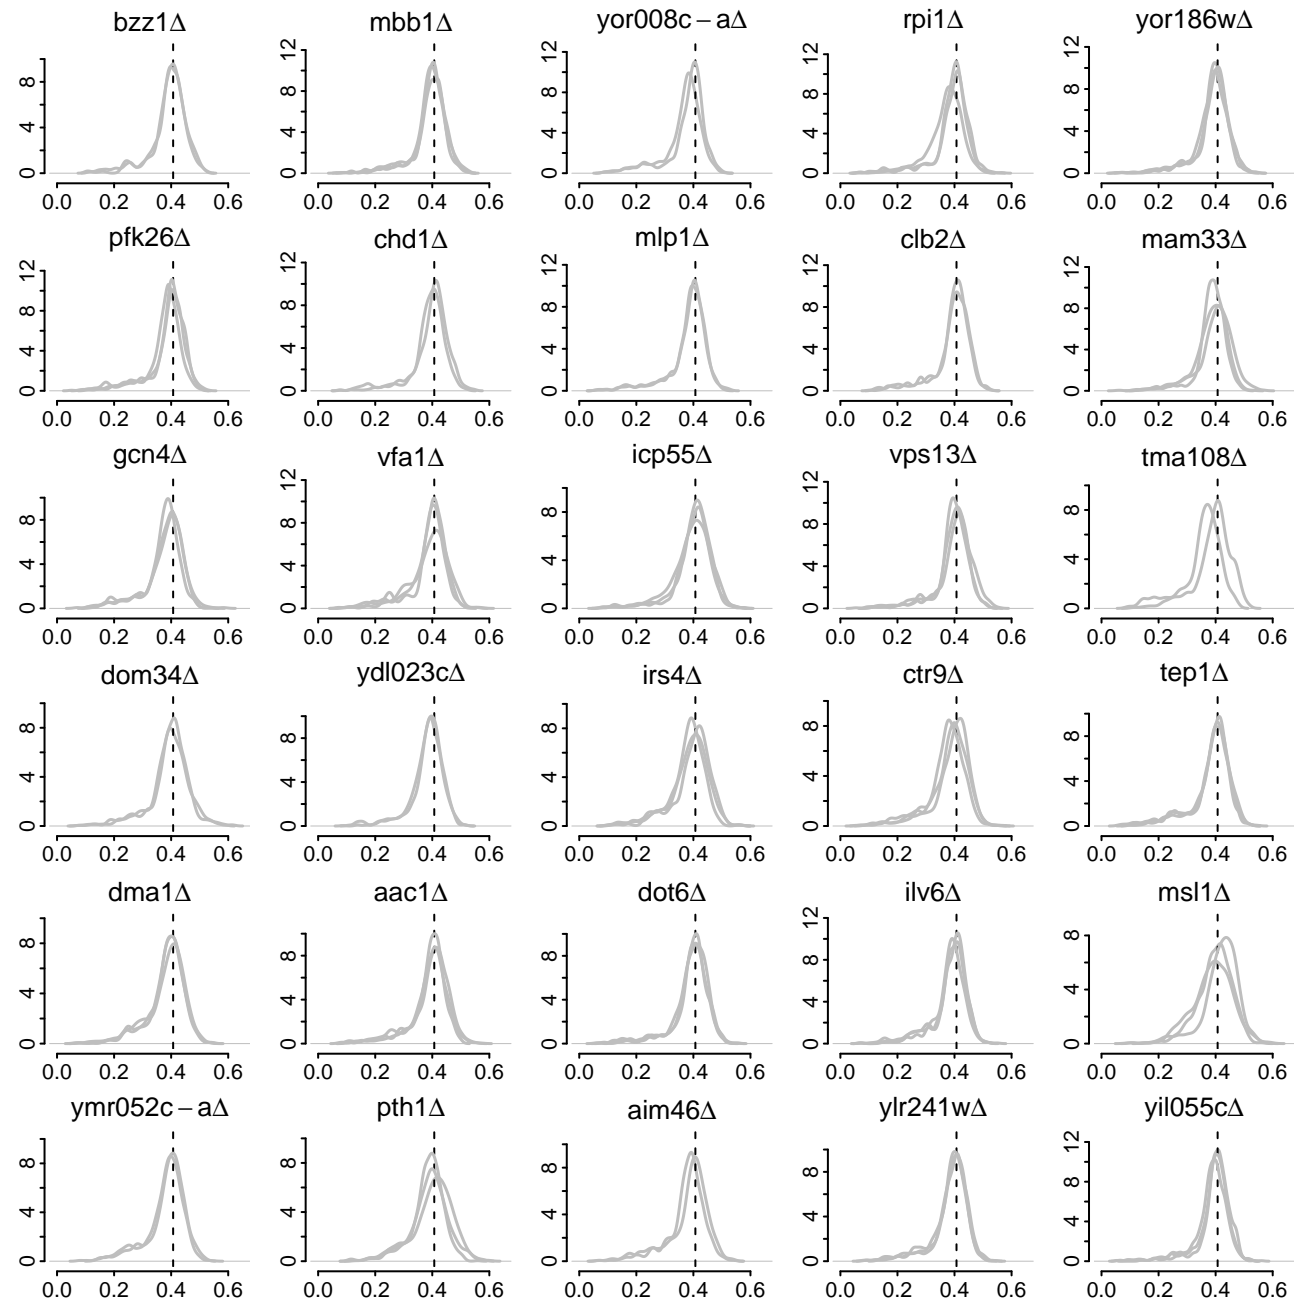

ygr122c-a $\Delta$ 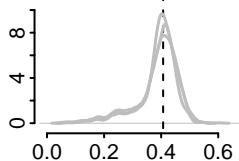erg28 $\Delta$ 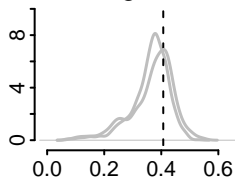tda5 $\Delta$ 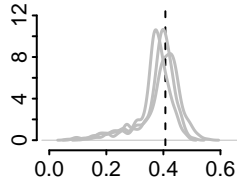fit1 $\Delta$ 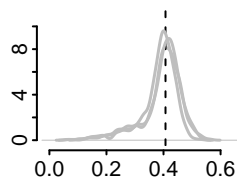cdc10 $\Delta$ 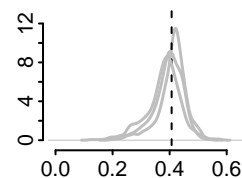mrps17 $\Delta$ 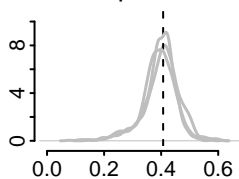scs2 $\Delta$ 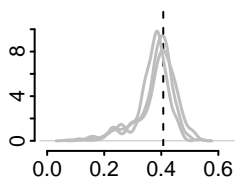pmp3 $\Delta$ 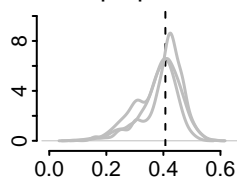bar1 $\Delta$ 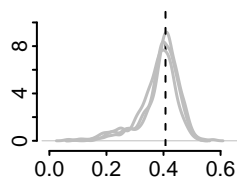yjr061w $\Delta$ 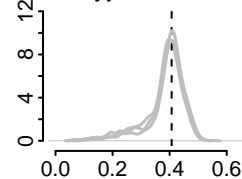vac7 $\Delta$ 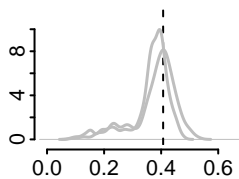cue5 $\Delta$ 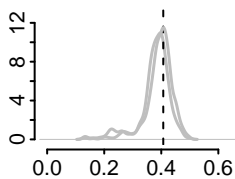isw2 $\Delta$ 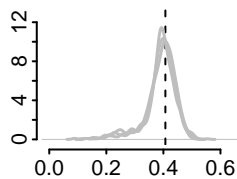mto1 $\Delta$ 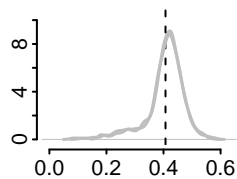taf14 $\Delta$ 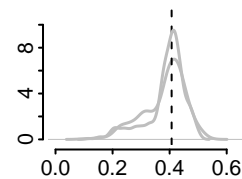lcl2 $\Delta$ 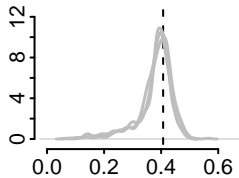ppr1 $\Delta$ 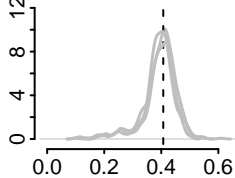yil165c $\Delta$ 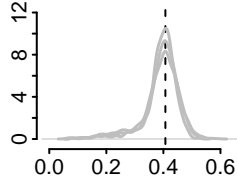maf1 $\Delta$ 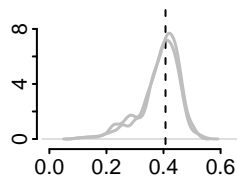

Supplement: supp [file elife-38904-supp-v1.zip › elife_poa_e38904_Supplementary_File_4.pdf]
