# Supplementary material for: Single cell functional genomics reveals the importance of mitochondria in cell-to-cell phenotypic variation
Source: eLife journal article supplement (doi:10.7554/elife.38904), 2019-01-14
Supplement: supp [file elife-38904-supp-v1.zip]

Archive with 29 entries (29 files):
- elife_poa_e38904_Supplementary_File_2.xlsx
- elife_poa_e38904_Figure_3_source_data_1.xlsx
- elife_poa_e38904_Figure_4_figure_supplement_1.pdf
- elife_poa_e38904_Figure_5_figure_supplement_12.pdf
- elife_poa_e38904_Figure_2_source_data_1.xlsx
- elife_poa_e38904_Supplementary_File_5.pdf
- elife_poa_e38904_Figure_5_figure_supplement_11.pdf
- elife_poa_e38904_Figure_3_figure_supplement_2.pdf
- elife_poa_e38904_Figure_2_figure_supplement_2.pdf
- elife_poa_e38904_Figure_5_source_data_1.xlsx
- elife_poa_e38904_Figure_3_figure_supplement_1.pdf
- elife_poa_e38904_Figure_5_figure_supplement_4.pdf
- elife_poa_e38904_Figure_4_source_data_1.xlsx
- elife_poa_e38904_Supplementary_File_6.docx
- elife_poa_e38904_Transparent_Reporting_File.docx
- elife_poa_e38904_Figure_2_figure_supplement_1.pdf
- elife_poa_e38904_Figure_5_figure_supplement_1.pdf
- elife_poa_e38904_Figure_5_figure_supplement_6.pdf
- elife_poa_e38904_Figure_5_figure_supplement_9.pdf
- elife_poa_e38904_Figure_5_figure_supplement_10.pdf
- elife_poa_e38904_Figure_5_figure_supplement_2.pdf
- elife_poa_e38904_Supplementary_File_3.xlsx
- elife_poa_e38904_Supplementary_File_1.xlsx
- elife_poa_e38904_Supplementary_File_4.pdf
- elife_poa_e38904_Figure_5_figure_supplement_7.pdf
- elife_poa_e38904_Figure_1_source_data_1.xlsx
- elife_poa_e38904_Figure_5_figure_supplement_3.pdf
- elife_poa_e38904_Figure_5_figure_supplement_5.pdf
- elife_poa_e38904_Figure_5_figure_supplement_8.pdf
