# Supplementary material for: Single cell functional genomics reveals the importance of mitochondria in cell-to-cell phenotypic variation
Source: eLife journal article supplement (doi:10.7554/elife.38904), 2019-01-14
Supplement: supp [file elife-38904-supp-v1.zip › elife_poa_e38904_Figure_1_source_data_1.xlsx]

## Sheet: Fig-1B
Strain	Mating Type	% Slow fraction	Source
273614N	Mat a	9.15	Clinical
322134S	Mat a	5.6	Clinical
YJM975	Mat a	9.46	Clinical
YJM978	Mat a	5.59	Clinical
YJM981	Mat a	3.28	Clinical
273614N	Mat α	0.15	Clinical
378604X	Mat α	5.97	Clinical
YJM975	Mat α	11.97	Clinical
YJM978	Mat α	5.77	Clinical
YJM981	Mat α	0	Clinical
273614N	Diploid	1.84	Clinical
YJM975	Diploid	7.58	Clinical
YJM978	Diploid	4.96	Clinical
YJM981	Diploid	0.31	Clinical
BC187	Mat a	1.88	Fermentation
DBVPG1106	Mat a	11.19	Fermentation
DBVPG6044	Mat a	17.87	Fermentation
L_1374	Mat a	9.61	Fermentation
L_1528	Mat a	5.28	Fermentation
NCYC110	Mat a	4.26	Fermentation
Y12	Mat a	21.25	Fermentation
YIIc17_E5	Mat a	10.22	Fermentation
BC187	Mat α	12.32	Fermentation
DBVPG1106	Mat α	2.93	Fermentation
DBVPG6044	Mat α	7.64	Fermentation
L_1374	Mat α	15.28	Fermentation
L_1528	Mat α	0	Fermentation
NCYC110	Mat α	15.36	Fermentation
Y12	Mat α	22.72	Fermentation
YIIc17_E5	Mat α	7.33	Fermentation
BC187	Diploid	8.22	Fermentation
DBVPG1106	Diploid	0.44	Fermentation
DBVPG1853	Diploid	3.32	Fermentation
DBVPG6044	Diploid	9.81	Fermentation
L_1374	Diploid	7.43	Fermentation
L_1528	Diploid	3.65	Fermentation
NCYC110	Diploid	4.27	Fermentation
Y12	Diploid	0	Fermentation
YIIc17_E5	Diploid	9.2	Fermentation
SK1	Mat a	0	Lab
W303	Mat a	5.06	Lab
Y55	Mat a	10.12	Lab
S288c	Mat α	6.56	Lab
SK1	Mat α	0	Lab
Y55	Mat α	15.46	Lab
SK1	Diploid	10.88	Lab
Y55	Diploid	4.61	Lab
DBVPG6765	Mat a	8.22	Unknown
DBVPG6765	Mat α	2.86	Unknown
DBVPG6765	Diploid	0	Unknown
DBVPG1373	Mat a	2.25	Wild
UWOPS03-461.4	Mat a	19.3	Wild
UWOPS05-217.3	Mat a	10.38	Wild
UWOPS05-227.2	Mat a	26.83	Wild
UWOPS83-787.3	Mat a	10.11	Wild
UWOPS87-2421	Mat a	12.61	Wild
YPS128	Mat a	8.45	Wild
YPS606	Mat a	8.19	Wild
DBVPG1373	Mat α	2.67	Wild
UWOPS03-461.4	Mat α	16.05	Wild
UWOPS05-217.3	Mat α	33.33	Wild
UWOPS05-227.2	Mat α	16.92	Wild
UWOPS83-787.3	Mat α	7.41	Wild
UWOPS87-2421	Mat α	4.49	Wild
YPS128	Mat α	11.91	Wild
YPS606	Mat α	26.19	Wild
DBVPG1373	Diploid	4.8	Wild
DBVPG1788	Diploid	6.14	Wild
UWOPS03-461.4	Diploid	6.67	Wild
UWOPS05-217.3	Diploid	8.04	Wild
UWOPS05-227.2	Diploid	6.62	Wild
UWOPS83-787.3	Diploid	10.33	Wild
UWOPS87-2421	Diploid	11.67	Wild
YPS128	Diploid	3.85	Wild
YPS606	Diploid	15.47	Wild

## Sheet: Fig-1C
Strain	Mating Type	% Slow fraction		Strain	Mating Type	% Slow fraction		Strain	Mating Type	% Slow fraction
273614N	Mat a	9.15		273614N	Mat α	0.15		273614N	Diploid	1.84
BC187	Mat a	1.88		BC187	Mat α	12.32		BC187	Diploid	8.22
DBVPG1106	Mat a	11.19		DBVPG1106	Mat α	2.93		DBVPG1106	Diploid	0.44
DBVPG1373	Mat a	2.25		DBVPG1373	Mat α	2.67		DBVPG1373	Diploid	4.8
DBVPG6044	Mat a	17.87		DBVPG6044	Mat α	7.64		DBVPG6044	Diploid	9.81
DBVPG6765	Mat a	8.22		DBVPG6765	Mat α	2.86		DBVPG6765	Diploid	0
L_1374	Mat a	9.61		L_1374	Mat α	15.28		L_1374	Diploid	7.43
L_1528	Mat a	5.28		L_1528	Mat α	0		L_1528	Diploid	3.65
NCYC110	Mat a	4.26		NCYC110	Mat α	15.36		NCYC110	Diploid	4.27
SK1	Mat a	0		SK1	Mat α	0		SK1	Diploid	10.88
UWOPS03-461.4	Mat a	19.3		UWOPS03-461.4	Mat α	16.05		UWOPS03-461.4	Diploid	6.67
UWOPS05-217.3	Mat a	10.38		UWOPS05-217.3	Mat α	33.33		UWOPS05-217.3	Diploid	8.04
UWOPS05-227.2	Mat a	26.83		UWOPS05-227.2	Mat α	16.92		UWOPS05-227.2	Diploid	6.62
UWOPS83-787.3	Mat a	10.11		UWOPS83-787.3	Mat α	7.41		UWOPS83-787.3	Diploid	10.33
UWOPS87-2421	Mat a	12.61		UWOPS87-2421	Mat α	4.49		UWOPS87-2421	Diploid	11.67
Y12	Mat a	21.25		Y12	Mat α	22.72		Y12	Diploid	0
Y55	Mat a	10.12		Y55	Mat α	15.46		Y55	Diploid	4.61
YIIc17_E5	Mat a	10.22		YIIc17_E5	Mat α	7.33		YIIc17_E5	Diploid	9.2
YJM975	Mat a	9.46		YJM975	Mat α	11.97		YJM975	Diploid	7.58
YJM978	Mat a	5.59		YJM978	Mat α	5.77		YJM978	Diploid	4.96
YJM981	Mat a	3.28		YJM981	Mat α	0		YJM981	Diploid	0.31
YPS128	Mat a	8.45		YPS128	Mat α	11.91		YPS128	Diploid	3.85
YPS606	Mat a	8.19		YPS606	Mat α	26.19		YPS606	Diploid	15.47
BY4741	Mat a	9.09		BY4742	Mat α	13.24		BY4743	Diploid	0.68
