# Supplementary material for: Single cell functional genomics reveals the importance of mitochondria in cell-to-cell phenotypic variation
Source: eLife journal article supplement (doi:10.7554/elife.38904), 2019-01-14
Supplement: supp [file elife-38904-supp-v1.zip › elife_poa_e38904_Figure_2_source_data_1.xlsx]

## Sheet: Fig - 2A
		Mode growth rate (h-1)		% Slow fraction
		Average	Stdev	Average	Stdev	Class
	WT	0.395	0.016	12.32	0.995	black
	WT	0.4	0.016	12.02	1.627	black
	WT	0.42	0.005	12.72	1.125	black
	WT	0.415	0.005	10.9	1.04	black
	WT	0.403	0.008	13.89	1.702	black
	WT	0.422	0.007	10.95	0.197	black
	WT	0.411	0.014	9.72	1.466	black
	WT	0.411	0.004	10.77	0.235	black
	WT	0.404	0.008	11.19	1.56	black
	WT	0.426	0.003	10.1	1.304	black
	WT	0.433	0.015	8.65	0.37	black
	WT	0.42	0.011	11.24	1.1	black
	WT	0.398	0.002	11.45	0.44	black
	WT	0.408	0.005	12.81	1.06	black
	WT	0.412	0.002	10.5	2.505	black
	WT	0.398	0.007	11.2	2.64	black
	WT	0.403	0.005	8.51	1.262	black
	WT	0.407	0.001	10.48	0.978	black
	WT	0.41	0.007	9.23	1.125	black
	WT	0.398	0.004	11.76	0.892	black
	WT	0.409	0.004	11.14	1.79	black
	WT	0.415	0.004	9.91	2.71	black
	WT	0.412	0.002	11.89	0.486	black
	UBI4	0.389	0.014	17.11	1.188	blue
	VPS24	0.388	0.019	14.84	0.68	blue
	ATP12	0.409	0.002	35.79	1.12	blue
	SRO9	0.415	0	19.42	1.5	blue
	RPS19B	0.415	0.005	16.2	1.225	blue
	ATP10	0.402	0.007	34.24	3.79	blue
	ATP23	0.405	0.009	35.92	1.603	blue
	IES1	0.413	0.004	19.8	1.115	blue
	QCR7	0.398	0	24.31	0.245	blue
	SEC28	0.414	0.017	24.82	0.44	blue
	DIG1	0.402	0.002	21.99	0.975	blue
	VPS17	0.405	0.005	16.69	2.5	blue
	SLG1	0.405	0.002	20.93	2.715	blue
	PET191	0.414	0.002	16.07	0.62	blue
	QRI5	0.412	0.002	20.92	0.92	blue
	SLI15	0.412	0	20.46	1.775	blue
	SGF11	0.397	0.01	16.89	1.887	blue
	TLG2	0.405	0.008	22.28	2.652	blue
	IPK1	0.401	0.01	17.21	2.902	blue
	YBR226C	0.409	0.004	15.97	1.79	blue
	COX17	0.414	0.009	15.6	2.698	blue
	STE50	0.414	0.002	14.02	0.608	blue
	NHX1	0.41	0.003	15.95	0.465	blue
	YMR153C-A	0.392	0.016	16.22	2.476	blue
	VPS75	0.396	0.011	13.64	1.455	blue
	PET8	0.396	0.013	16.47	3.076	blue
	QCR2	0.401	0.003	15.48	1.095	blue
	JNM1	0.406	0.014	16.27	2.99	blue
	VPS35	0.404	0.013	13.87	1.307	blue
	COY1	0.397	0.009	15.19	0.135	blue
	HAP5	0.396	0.016	22.11	0.558	blue
	ARP1	0.401	0.002	15.17	0.21	blue
	FRA1	0.401	0.006	15.03	2.25	blue
	WHI5	0.403	0.008	17.41	1.96	blue
	BLM10	0.4	0.008	23.36	2.453	blue
	SNX41	0.41	0.01	13.53	0.213	blue
	MSS1	0.4	0.013	16.7	1.6	blue
	MSH2	0.405	0.011	14.86	1.124	blue
	PHO84	0.418	0.007	15.48	1.821	blue
	UFD2	0.41	0.009	15.93	0.875	blue
	YAR029W	0.393	0.023	16.03	1.748	blue
	ACO1	0.401	0.013	13.78	0.766	blue
	PTC1	0.411	0.007	16.38	2.976	blue
	SAC6	0.399	0	19.9	0.49	blue
	RPL23B	0.413	0.009	18.17	3.706	blue
	CDC55	0.41	0.013	14.19	0.83	blue
	ARG8	0.4	0.009	14.91	0.385	blue
	TRP4	0.407	0.009	19.68	3.477	blue
	MRPL13	0.404	0.003	22.89	5.495	blue
	MRPS5	0.406	0.009	18.33	1.8	blue
	RBG1	0.404	0.004	15.88	0.635	blue
	SYN8	0.398	0.008	19.31	1.68	blue
	CPR2	0.403	0.004	16.07	1.704	blue
	YHR078W	0.402	0.004	16.71	0.35	blue
	PCD1	0.405	0.004	14.34	1.262	blue
	LRE1	0.404	0.006	16.86	1.468	blue
	SWE1	0.403	0.005	13.48	0.408	blue
	DIE2	0.408	0.005	16.54	0.545	blue
	EXG2	0.412	0.002	13.98	1.181	blue
	CPR1	0.405	0.002	13.75	0.471	blue
	TOD6	0.41	0.001	13.75	0.617	blue
	SUR2	0.403	0.008	14.96	0.842	blue
	ALR2	0.395	0.013	14.16	1.088	blue
	BIO3	0.393	0.019	16.77	0.17	blue
	DUG2	0.387	0.019	13.32	1.586	blue
	YDL177C	0.385	0.021	14.37	1.654	blue
	YBR016W	0.396	0.025	17.5	1.89	blue
	CSH1	0.392	0.02	14.29	0.475	blue
	YCL023C	0.396	0.016	14.08	2.171	blue
	SLM1	0.401	0.012	14.16	1.187	blue
	PHO89	0.409	0.011	14.43	0.783	blue
	YNL013C	0.406	0.006	14.22	1.641	blue
	YNL146W	0.403	0.012	14.49	1.253	blue
	SPG5	0.405	0.003	19.66	2.065	blue
	GAT2	0.401	0.001	20.87	0.952	blue
	HIS5	0.4	0.007	13.82	1.483	blue
	HOT1	0.411	0.007	17.25	2.525	blue
	NTH1	0.405	0.002	18.88	0.49	blue
	YCR049C	0.402	0.001	17.86	2.222	blue
	SIM1	0.404	0.007	15.29	1.195	blue
	TDA8	0.401	0.008	22.15	2.545	blue
	YIH1	0.406	0.002	16.44	0.51	blue
	NTH2	0.402	0.002	14.23	0.616	blue
	DMA2	0.407	0.001	13.8	0.43	blue
	UGA2	0.393	0.015	13.87	1.547	blue
	RAS2	0.402	0.008	15.15	0.892	blue
	ASG1	0.397	0.014	15.73	1.334	blue
	SAL1	0.402	0.002	15.91	0.515	blue
	YDL050C	0.398	0.006	14.56	0.753	blue
	STE18	0.413	0.013	13.95	1.188	blue
	FLC3	0.407	0.007	15.79	2.259	blue
	UBX3	0.41	0.004	14.95	0.339	blue
	AST2	0.404	0.005	16.37	1.474	blue
	MAM1	0.406	0.002	15.46	2.734	blue
	GNP1	0.412	0.005	15.35	1.911	blue
	HLR1	0.401	0.003	16.11	0.825	blue
	VHR1	0.418	0.002	18.45	0.75	blue
	ELO2	0.424	0.002	6.81	2.984	brown4
	MRPL28	0.419	0.002	6.77	1.259	brown4
	BNR1	0.419	0.003	6.46	0.783	brown4
	ASF1	0.44	0.009	17.87	2.058	chocolate
	ATP20	0.422	0.003	39.88	2.367	chocolate
	MDJ1	0.431	0.009	14.52	1.028	chocolate
	BUB1	0.436	0.007	25.48	1.592	chocolate
	VPS30	0.422	0.006	9.88	2.078	cyan3
	FAR7	0.425	0.007	9.96	0.995	cyan3
	SMA2	0.429	0.005	11.67	2.245	cyan3
	YBR225W	0.423	0.001	12.72	1.25	cyan3
	NGR1	0.424	0.004	9.18	0.468	cyan3
	URA2	0.42	0.003	11.42	3.701	cyan3
	MNN10	0.278	0.003	0	0	darkgreen
	GLO3	0.275	0.005	0.46	0.651	darkgreen
	RTC6	0.323	0.005	0	0	darkgreen
	RIC1	0.188	0.021	0	0	darkgreen
	RPL43A	0.235	0.02	0	0	darkgreen
	RPS10A	0.274	0.018	0	0	darkgreen
	ATP17	0.349	0.003	0.1	0.105	darkgreen
	SSE1	0.291	0.001	0.47	0.47	darkgreen
	PET123	0.365	0.008	0.51	0.51	darkgreen
	RRD1	0.38	0.011	1.33	1.335	darkgreen
	PPT2	0.397	0.012	10.67	1.372	grey
	MRPL31	0.407	0.011	9.13	1.09	grey
	MTC5	0.399	0.011	8.55	2.46	grey
	HAP2	0.399	0.006	8.22	1.38	grey
	TIF3	0.413	0.006	11.24	1.632	grey
	VAM10	0.412	0.006	13.48	2.24	grey
	MAF1	0.416	0.004	16.64	3.145	grey
	AIM26	0.396	0.01	14.72	3.514	grey
	TAF14	0.415	0.001	18.91	5.73	grey
	ASK10	0.4	0.001	11.72	3.625	grey
	RPL21B	0.397	0.001	10.29	0.745	grey
	CDC73	0.403	0.008	12.59	0.65	grey
	RPS21B	0.395	0.013	8.94	1.202	grey
	PFK2	0.398	0.008	10.52	1.944	grey
	RVS161	0.397	0.015	10.73	1.61	grey
	RPL8A	0.399	0.01	12.98	3.836	grey
	RDI1	0.403	0.009	13.48	2.522	grey
	SNX4	0.399	0.004	11.7	0.488	grey
	SDS3	0.391	0.019	11.22	2.648	grey
	ORM2	0.407	0.006	12.58	0.864	grey
	ZRC1	0.399	0.007	9.88	0.679	grey
	SUR1	0.402	0.006	12.58	2.931	grey
	HIR2	0.398	0.013	11.98	2.116	grey
	TRS85	0.398	0.014	9.25	1.625	grey
	BMH1	0.407	0.004	12.09	4.019	grey
	SCS2	0.398	0.01	13.37	1.481	grey
	INP1	0.416	0.011	10.71	1.233	grey
	IRA2	0.419	0.012	8.78	1.365	grey
	CBF1	0.402	0.008	12.82	1.855	grey
	YGR122W	0.402	0.009	12.52	0.921	grey
	PAT1	0.4	0.011	10.35	0.426	grey
	FPR2	0.399	0.012	11.4	2.143	grey
	MAM33	0.402	0.009	8.37	2.099	grey
	GYP1	0.4	0.004	11.91	2.555	grey
	YMR052C-A	0.402	0.004	14.15	1.11	grey
	SLC1	0.4	0.006	13.85	3.175	grey
	RPL38	0.408	0.005	11.23	2.346	grey
	AAD4	0.405	0.002	12.04	1.911	grey
	APM1	0.406	0.002	12.24	1.864	grey
	PRY3	0.405	0.003	10.86	1.59	grey
	VTC1	0.403	0.008	11.09	2.056	grey
	YOR008C-A	0.394	0.011	12.99	0.15	grey
	TKL1	0.413	0.006	11.71	0.783	grey
	PPR1	0.411	0.006	8.15	1.891	grey
	YDR426C	0.399	0.007	11.27	0.912	grey
	QCR9	0.399	0.005	11.28	2.802	grey
	MTO1	0.421	0.001	8.36	0.605	grey
	RCN2	0.4	0.007	9	3.342	grey
	YLR269C	0.418	0.007	9.86	1.668	grey
	YHR050W-A	0.408	0.002	9.38	1.632	grey
	YPL261C	0.402	0.002	11.12	1.305	grey
	ROM2	0.414	0.006	10.65	0.377	grey
	OMS1	0.398	0.008	9.56	2.193	grey
	SIR2	0.404	0.002	10.99	1.726	grey
	CWH41	0.401	0.004	9.55	0.995	grey
	IRS4	0.407	0.012	14.07	2.198	grey
	TPK1	0.407	0.009	9.49	0.493	grey
	YNR029C	0.398	0.019	9.15	0.494	grey
	TDA5	0.399	0.021	12.65	1.1	grey
	RAD18	0.404	0.015	11.6	1.042	grey
	VPS70	0.403	0.029	11.32	0.8	grey
	YDR455C	0.397	0.005	8.18	1.485	grey
	UBR2	0.411	0.007	8.71	3.335	grey
	SAP1	0.41	0.008	11.76	1.267	grey
	VPS13	0.408	0.009	8.61	2.056	grey
	STB3	0.399	0.009	11.01	1.19	grey
	YLR416C	0.42	0.006	9.75	1.635	grey
	ARO8	0.402	0.011	10.4	1.162	grey
	LTE1	0.399	0.003	12.82	0.965	grey
	CHS5	0.416	0.002	10.78	2.815	grey
	OTU2	0.416	0.008	11.9	1.037	grey
	PAC1	0.416	0.008	11.26	2.129	grey
	YOR277C	0.414	0.005	10.43	1.235	grey
	RXT3	0.41	0.009	10.12	2.887	grey
	PMC1	0.407	0.001	9.17	0.7	grey
	POG1	0.396	0.013	8.5	3.548	grey
	YLR422W	0.408	0.002	9.98	1.19	grey
	AGP1	0.401	0.014	8.82	2.283	grey
	MSH5	0.404	0.015	12.01	4.08	grey
	GDI1	0.414	0.001	8.39	4.982	grey
	ICP55	0.414	0.002	9.27	1.271	grey
	YBP1	0.414	0.009	11.57	1.925	grey
	ATG8	0.397	0.015	10.2	3.346	grey
	CMC1	0.405	0.018	11.54	0.967	grey
	YMR147W	0.417	0.008	11.92	1.679	grey
	VHS3	0.406	0.005	11	0.09	grey
	EST1	0.4	0.004	11.02	3.845	grey
	ADE3	0.407	0.012	12.1	3.803	grey
	MRPS17	0.409	0.007	5.87	3.877	grey
	RPL39	0.419	0.013	12.26	1.409	grey
	YGL024W	0.408	0.009	10.09	2.044	grey
	PTH1	0.406	0.009	8.78	1.057	grey
	FCY22	0.423	0.011	14.5	3.685	grey
	PEX19	0.396	0.018	9.08	3.609	grey
	STM1	0.397	0.011	11.74	1.747	grey
	CDC10	0.405	0.012	8.87	0.52	grey
	YDL186W	0.383	0.031	6.29	6.295	grey
	RPB4	0.394	0.008	8.56	0.14	grey
	MNN9	0.358	0.025	6.53	4.636	grey
	GRR1	0.41	0.004	11.8	1.243	grey
	CTR9	0.4	0.016	12.94	1.513	grey
	SOD1	0.399	0.011	12.04	0.185	grey
	RRF1	0.404	0.007	11.69	1.893	grey
	NEW1	0.401	0.007	11.29	0.945	grey
	ERG28	0.394	0.015	16.52	4.22	grey
	HFI1	0.406	0.015	12.1	1.703	grey
	MSL1	0.417	0.015	8.95	1.487	grey
	ERI1	0.409	0.015	12.77	0.83	grey
	RAD4	0.402	0	9.91	0.46	grey
	PAF1	0.408	0.007	11.66	2.69	grey
	TMA23	0.397	0.008	8.5	2.59	grey
	RGP1	0.4	0.009	11.3	1.808	grey
	ZAP1	0.313	0.019	6.31	6.185	grey
	MRP2	0.416	0.005	14.98	4.304	grey
	PMP3	0.414	0.008	17.35	6.647	grey
	AMF1	0.332	0.017	2.56	3.616	grey
	GCN4	0.4	0.007	13.03	1.386	grey
	RPL1B	0.409	0.015	8.82	3.008	grey
	AIM23	0.397	0.005	12.15	2.785	grey
	VAC7	0.401	0.007	14.13	0.19	grey
	YBR224W	0.41	0.021	10.64	0.32	grey
	MMS1	0.414	0.008	9.58	0.07	grey
	DOM34	0.404	0.007	7.21	2.38	grey
	GOS1	0.409	0.013	10.37	3.821	grey
	NUM1	0.412	0.005	11.77	0.1	grey
	PUF3	0.397	0.007	10.72	0.7	grey
	GPB1	0.396	0.008	10	0.76	grey
	TPK2	0.401	0.013	8.97	1.281	grey
	WSC2	0.403	0.013	9.15	1.609	grey
	GPB2	0.402	0.007	9.42	0.773	grey
	APC9	0.401	0.009	9.99	3.338	grey
	ALP1	0.396	0.012	10.77	1.05	grey
	SPO23	0.396	0.011	10.03	2.085	grey
	LCL2	0.4	0.007	13.32	0.429	grey
	TGL5	0.401	0.007	9.82	1.563	grey
	PPT1	0.396	0.011	10.33	1.372	grey
	YLR108C	0.399	0.007	9.87	1.515	grey
	CIN5	0.398	0.001	11.97	1.14	grey
	CAD1	0.402	0.001	8.75	2.562	grey
	SIP5	0.395	0.01	11.07	2.576	grey
	ISW2	0.4	0.005	8.31	1.242	grey
	CUE5	0.402	0.005	8.14	0.71	grey
	SNN1	0.385	0.026	10.48	1.429	grey
	PDE2	0.385	0.025	6.55	2.365	grey
	ILV6	0.404	0.009	13.48	1.545	grey
	YCR022C	0.396	0.01	11.17	0.932	grey
	PUT3	0.398	0.006	9.7	1.611	grey
	DCS2	0.403	0.002	10.03	1.004	grey
	PUN1	0.396	0.009	7.33	2.485	grey
	FUS1	0.401	0.004	11.91	1.048	grey
	TIS11	0.401	0.003	9.72	1.896	grey
	TIM21	0.402	0.007	9.25	0.707	grey
	GAC1	0.401	0.004	11.16	3.048	grey
	FAR10	0.401	0.008	9.03	2.725	grey
	MXR2	0.408	0.005	11.96	1.808	grey
	YMR074C	0.397	0.008	10.48	1.017	grey
	PAN3	0.412	0.004	13.38	2.773	grey
	SCM4	0.404	0.005	11.62	0.144	grey
	YOR186W	0.401	0.005	9	0.721	grey
	YJL150W	0.401	0.006	9.54	2.107	grey
	YLR241W	0.406	0.004	13.29	0.695	grey
	BZZ1	0.402	0.004	8.25	1.5	grey
	APA1	0.4	0.007	12.29	2.204	grey
	TUL1	0.403	0.005	11.36	1.035	grey
	MBB1	0.406	0.009	8.93	1.599	grey
	IDS2	0.404	0.003	11.13	1.198	grey
	RCK2	0.408	0.007	10.07	0.502	grey
	DMA1	0.404	0.004	14.38	3.007	grey
	YGR066C	0.4	0.006	11.21	0.714	grey
	AFI1	0.4	0.002	9.44	0.977	grey
	STE4	0.409	0.006	10.01	0.838	grey
	STE13	0.399	0.003	11.41	0.704	grey
	CSR1	0.401	0.004	11.08	2.978	grey
	AIM46	0.399	0.007	13.79	0.72	grey
	ADY2	0.398	0.005	14.28	3.394	grey
	YOR225W	0.4	0.004	10.2	0.172	grey
	LCB3	0.399	0.007	11.32	0.933	grey
	SWC7	0.408	0.007	9.58	2.34	grey
	PIG1	0.4	0.006	8.13	2.705	grey
	CTH1	0.407	0.008	12.39	0.404	grey
	LCL1	0.405	0.008	11.95	2.04	grey
	TYW3	0.406	0.003	11	1.975	grey
	BAR1	0.403	0.005	13.4	1.194	grey
	PIG2	0.411	0.008	12.29	2.984	grey
	MPD2	0.416	0.003	11.49	2.547	grey
	YPR039W	0.41	0.007	9.09	1.809	grey
	DBF20	0.401	0.006	11.88	1.062	grey
	NAS6	0.408	0.001	11.1	1.527	grey
	PRM8	0.404	0.006	11.31	1.502	grey
	DUG3	0.406	0	12.02	1.239	grey
	BSC2	0.407	0.004	9.82	0.564	grey
	YIA6	0.395	0.017	11.4	1.65	grey
	MSN1	0.412	0.002	9.47	2.637	grey
	YPR092W	0.416	0.002	12.33	2.06	grey
	YDR215C	0.401	0	13.11	0.035	grey
	CLB2	0.41	0.002	13.45	0.425	grey
	YGL082W	0.408	0.002	10.25	1.071	grey
	ZIP1	0.405	0.001	14.46	2.455	grey
	DOT6	0.408	0.002	9.07	0.991	grey
	YJL067W	0.406	0.006	10.49	1.992	grey
	ADR1	0.395	0.001	10.59	1.775	grey
	YLH47	0.407	0.01	11.22	2.146	grey
	TDA7	0.403	0.007	12.42	0.654	grey
	YIL055C	0.403	0.005	7.66	2.517	grey
	THO1	0.404	0.011	10.18	1.001	grey
	YPR146C	0.403	0.003	8.72	0.775	grey
	RPN14	0.402	0.006	9.69	2.623	grey
	YHR140W	0.397	0.007	10.25	0.229	grey
	YHR127W	0.404	0.005	11.48	1.261	grey
	PTC6	0.403	0.016	11.55	3.28	grey
	TMA108	0.39	0.018	14.11	2.75	grey
	TDH2	0.392	0.013	10.66	0.565	grey
	YBR071W	0.399	0.011	12.07	0.854	grey
	REV7	0.397	0.01	13.34	2.909	grey
	YAK1	0.397	0.013	11.46	0.389	grey
	YIL092W	0.392	0.013	9.81	1.775	grey
	PFK26	0.399	0.006	13.07	1.434	grey
	TEC1	0.405	0.007	11.2	2.135	grey
	MAL33	0.401	0.004	9.29	2.58	grey
	YJR061W	0.404	0.005	14.25	1.911	grey
	CRZ1	0.401	0.003	10.9	2.726	grey
	YNL144C	0.4	0.005	13.52	1.84	grey
	INP52	0.402	0.002	13.47	5.018	grey
	SSE2	0.395	0.001	8.72	2.3	grey
	MEP2	0.403	0.004	12.16	0.53	grey
	ERP3	0.395	0	11.07	0.085	grey
	YDL114W	0.402	0.005	13.64	3.048	grey
	YNL134C	0.402	0.004	13.78	3.154	grey
	RPI1	0.399	0.013	8.93	0.801	grey
	MLP1	0.4	0.004	13.58	0.59	grey
	YDL023C	0.395	0.001	7.45	1.835	grey
	YDL121C	0.405	0.004	12.62	2.032	grey
	TEP1	0.407	0.005	14.57	2.736	grey
	CPT1	0.399	0.007	11.53	2.006	grey
	AYR1	0.407	0.01	11.98	0.72	grey
	YIL165C	0.407	0.002	7.95	2.38	grey
	HAA1	0.399	0.005	11.29	1.078	grey
	YDL027C	0.409	0.002	10.66	1.593	grey
	STE7	0.411	0	14.18	2.785	grey
	DCR2	0.399	0.009	12.29	0.344	grey
	YBR134W	0.396	0.008	12.2	2.93	grey
	SAK1	0.407	0.013	13.08	1.535	grey
	LHP1	0.402	0.001	13.11	0.77	grey
	FIT1	0.409	0.008	13.5	1.1	grey
	CHD1	0.41	0.004	8.88	0.78	grey
	YOR364W	0.414	0.007	12.19	1.808	grey
	SET6	0.416	0.008	11.49	1.449	grey
	NDE2	0.407	0	13.3	1.385	grey
	MET13	0.403	0.003	13.71	1.795	grey
	GRX4	0.409	0.004	8.59	1.9	grey
	YGR122C-A	0.409	0.005	14.43	2.066	grey
	YDL026W	0.41	0.008	12.46	1.154	grey
	AAC1	0.412	0.003	13.27	0.947	grey
	STE23	0.415	0.005	12.85	1.181	grey
	UBC13	0.408	0.003	10.38	1.466	grey
	COX5B	0.407	0.008	13.15	2.22	grey
	RNR3	0.412	0.008	12.35	2.013	grey
	YGL081W	0.411	0.007	12	0.36	grey
	DIG2	0.418	0.005	13.86	2.265	grey
	OM45	0.406	0.008	11.31	2.021	grey
	AIM20	0.411	0.007	12.66	0.866	grey
	VFA1	0.408	0.005	15.31	3.362	grey
	SUV3	0.357	0.009	7.39	1.339	lightblue
	PHO85	0.281	0.014	4.71	2.275	lightblue
	ETR1	0.385	0.003	13.47	2.755	lightblue
	ASC1	0.387	0.013	11.67	3.265	lightblue
	SPT10	0.259	0.007	3.03	1.012	lightblue
	LGE1	0.308	0.009	5.26	1.56	lightblue
	RPL7A	0.326	0.01	8.43	4.175	lightblue
	FUR4	0.115	0.01	0	0	lightblue
	YLR184W	0.291	0.007	2.13	0.176	lightblue
	YOR309C	0.294	0.008	3.86	1.343	lightblue
	GTR2	0.388	0.006	9	3.008	lightblue
	RPA34	0.368	0.009	8.41	2.878	lightblue
	NIP100	0.378	0.01	9	0.747	lightblue
	MRP51	0.361	0.014	5.69	0.592	lightblue
	VAC8	0.378	0.01	9.66	2.143	lightblue
	RPS18B	0.338	0.014	6.35	1.398	lightblue
	PET309	0.364	0.006	9.95	3.409	lightblue
	RPS4A	0.355	0.01	4.85	0.8	lightblue
	RPO41	0.323	0.007	2.82	2.009	lightblue
	SNF4	0.387	0.006	11.06	1.58	lightblue
	HDA3	0.358	0.002	6.67	2.27	lightblue
	YDJ1	0.255	0.008	2.78	1.295	lightblue
	MRPL38	0.331	0.011	3.62	2.125	lightblue
	RPL13A	0.332	0.01	5.01	4.734	lightblue
	IWR1	0.318	0.007	6.57	1.929	lightblue
	VIP1	0.312	0.016	10.51	1.57	lightblue
	MTG2	0.342	0.01	7.52	3.255	lightblue
	YPR117W	0.381	0.009	9.93	1.618	lightblue
	VAM6	0.395	0.007	12.67	1.423	lightblue
	FYV12	0.374	0.007	10.72	1.12	lightblue
	VPS29	0.187	0.018	0.74	1.051	lightblue
	YER077C	0.382	0.006	13.16	1.9	lightblue
	PMR1	0.313	0.013	6.83	2.19	lightblue
	RPS4B	0.329	0.013	6.84	0.095	lightblue
	ERG3	0.317	0.009	4.52	1.532	lightblue
	OAR1	0.379	0.006	9.57	2.69	lightblue
	MEH1	0.343	0.008	3.22	2.65	lightblue
	HIT1	0.361	0.001	5.29	3.855	lightblue
	MCT1	0.36	0.008	8.8	0.96	lightblue
	RPS21A	0.337	0.017	4.52	1.36	lightblue
	COQ6	0.393	0.009	12.35	1.706	lightblue
	DBP3	0.351	0.015	6.32	0.645	lightblue
	VMA21	0.367	0.013	6.94	1.874	lightblue
	TPS1	0.319	0.009	4.53	2.089	lightblue
	YLR358C	0.383	0.008	8.59	1.929	lightblue
	RTF1	0.314	0.007	5.88	3.325	lightblue
	FLX1	0.374	0.01	6.3	2.709	lightblue
	RPS17A	0.29	0.001	2.04	0.24	lightblue
	ISA1	0.367	0.015	4.81	3.14	lightblue
	SPC72	0.389	0.008	16.58	7.602	lightblue
	RPL19B	0.319	0.02	2.03	1.956	lightblue
	IRC14	0.277	0.013	3.26	1.26	lightblue
	FEN2	0.157	0.009	0	0	lightblue
	MSH1	0.216	0.025	2.09	2.951	lightblue
	COQ1	0.373	0.013	10.63	3.373	lightblue
	RRP8	0.329	0.008	6.82	3.406	lightblue
	DBP7	0.277	0.008	1.79	1.284	lightblue
	ADH1	0.364	0.015	8.04	0.49	lightblue
	FSH1	0.384	0.01	10.74	1.105	lightblue
	YPT6	0.375	0.012	4.52	2.12	lightblue
	RPS11B	0.346	0.013	7.01	2.655	lightblue
	FES1	0.343	0.01	3.71	2.71	lightblue
	RPP1B	0.338	0.011	8.19	2.703	lightblue
	RPS23A	0.336	0.007	1.94	1.686	lightblue
	AEP1	0.325	0.005	1.46	1.46	lightblue
	LRS4	0.391	0.004	8.51	1.375	lightblue
	MTM1	0.335	0.007	3.1	1.103	lightblue
	FYV1	0.378	0.007	10.08	2.353	lightblue
	ELP3	0.358	0.006	9.97	0.17	lightblue
	RTT109	0.198	0.023	1.18	1.664	lightblue
	UBC4	0.358	0.005	7.68	1.306	lightblue
	YME1	0.254	0.008	0.77	0.77	lightblue
	GET2	0.367	0	6.9	4.435	lightblue
	SGF73	0.359	0.009	6.99	3.6	lightblue
	RCY1	0.176	0.001	0.07	0.065	lightblue
	SSN8	0.292	0.011	2.66	2.14	lightblue
	CGI121	0.356	0.009	2.71	2.71	lightblue
	IKI1	0.325	0.003	1.46	0.435	lightblue
	RPS29A	0.328	0.003	6.82	2.343	lightblue
	GIM5	0.369	0.01	10.84	2.248	lightblue
	GTR1	0.37	0.007	11.81	0.545	lightblue
	RPS16B	0.341	0	9.41	2.015	lightblue
	YGR160W	0.371	0.007	11.3	0.115	lightblue
	YBL071C-B	0.324	0.002	5.29	0.235	lightblue
	CCR4	0.351	0.015	7.29	1.286	lightblue
	PCP1	0.332	0.007	6.01	1.546	lightblue
	CNM67	0.333	0.01	5.95	1.159	lightblue
	VMA4	0.361	0.01	9.61	1.658	lightblue
	RPS1A	0.342	0.013	5.19	0.305	lightblue
	CTR1	0.341	0.008	5.52	1.615	lightblue
	VPS51	0.35	0.003	9.5	1.7	lightblue
	GPM2	0.298	0.007	2.79	1.405	lightblue
	CBS1	0.39	0.002	13.39	0.22	lightblue
	MRP7	0.329	0.013	5.16	0.325	lightblue
	RIM9	0.368	0.006	9.96	1.93	lightblue
	HMI1	0.388	0.009	12.62	2.203	lightblue
	VPS27	0.377	0.002	7.19	0.21	lightblue
	PIH1	0.301	0.005	2.51	1.565	lightblue
	ARO1	0.39	0.007	9.24	0.57	lightblue
	AIM44	0.386	0.008	9.55	1.905	lightblue
	YGR125W	0.381	0.002	9.58	3.219	lightblue
	VTS1	0.369	0.007	8.73	1.432	lightblue
	SRN2	0.394	0.007	11.4	2.52	lightblue
	TVP18	0.353	0.004	3.25	2.159	lightblue
	CAC2	0.361	0.005	5.32	0.783	lightblue
	YNL120C	0.355	0.006	5.41	1.47	lightblue
	RLF2	0.364	0.005	4.81	1.125	lightblue
	RPN10	0.359	0.003	10.51	2.685	lightblue
	KAP123	0.358	0.008	3.38	2.619	lightblue
	SRO7	0.379	0.007	9.47	2.322	lightblue
	PEX1	0.385	0.004	11.97	1.676	lightblue
	SSA4	0.371	0.009	5.35	1.223	lightblue
	YKE2	0.37	0.002	10.06	2.166	lightblue
	CGR1	0.378	0.009	7.52	1.334	lightblue
	YBR196C-A	0.344	0.012	5.17	0.516	lightblue
	GTF1	0.373	0.005	5.41	1.906	lightblue
	PEX3	0.322	0.002	4.79	3.717	lightblue
	ARP6	0.375	0.009	10.19	0.09	lightblue
	HOM2	0.363	0.01	6.22	1.045	lightblue
	SLX9	0.339	0.008	3.25	2.005	lightblue
	SWD1	0.351	0.005	7.12	0.292	lightblue
	UBA4	0.331	0.004	7.4	1.809	lightblue
	YGL152C	0.354	0.005	7.56	2.103	lightblue
	NUP188	0.346	0.009	10.04	3.792	lightblue
	BRE2	0.373	0.007	11.89	4.175	lightblue
	NCS2	0.336	0.012	9.42	3.459	lightblue
	IMP1	0.377	0.008	10.29	0.909	lightblue
	NPL6	0.374	0.011	10.13	1.288	lightblue
	THR4	0.376	0.013	8	2.226	lightblue
	ATC1	0.371	0.004	10.89	1.888	lightblue
	COA4	0.352	0.011	8.86	0.4	lightblue
	SSD1	0.379	0.011	14.53	2.725	lightblue
	RPS22A	0.392	0.009	10.96	1.846	lightblue
	SBP1	0.356	0.011	9.11	2.184	lightblue
	CKB1	0.373	0.01	8.46	2.445	lightblue
	YFR032C-B	0.379	0.008	9.02	0.654	lightblue
	SWI5	0.385	0.008	12.63	2.06	lightblue
	PTK2	0.376	0.003	6.94	0.974	lightblue
	RPL34B	0.322	0.007	6.93	5	lightblue
	BEM1	0.333	0.007	4.85	2.969	lightblue
	IES5	0.385	0.008	14.31	4.293	lightblue
	BUD28	0.272	0.002	2.04	0.175	lightblue
	BRR1	0.362	0.008	6.66	1.033	lightblue
	YJL120W	0.386	0.002	9.52	1.96	lightblue
	LAT1	0.374	0.005	8.79	2.335	lightblue
	LIP2	0.383	0.009	8.82	3.079	lightblue
	NCS6	0.325	0.005	6.5	2.998	lightblue
	OPI8	0.353	0.006	7.98	0.77	lightblue
	RPS10B	0.335	0.014	5.33	1.249	lightblue
	KAP122	0.355	0.007	9	2.828	lightblue
	STB5	0.289	0.013	3.31	2.11	lightblue
	TPM1	0.367	0.004	9.25	2.042	lightblue
	BTS1	0.344	0.017	6.31	1.696	lightblue
	MRPL1	0.364	0.016	7.37	2.24	lightblue
	YGL149W	0.385	0.021	12.58	2.69	lightblue
	YML102C-A	0.344	0.013	6.92	2.132	lightblue
	NOT3	0.37	0.011	10.99	2.896	lightblue
	YJR087W	0.386	0.016	7.7	0.868	lightblue
	TIF1	0.386	0.009	7.47	1.735	lightblue
	LYS20	0.293	0.003	3.43	1.213	lightblue
	RIM20	0.371	0.013	9.66	1.493	lightblue
	ATP18	0.373	0.009	9.61	1.735	lightblue
	RPL9A	0.329	0.01	7.61	3.138	lightblue
	SLK19	0.387	0.002	9.73	0.835	lightblue
	SCS7	0.384	0.001	8.37	0.57	lightblue
	YNL109W	0.377	0.007	7.44	2.706	lightblue
	YDL180W	0.394	0.003	9.94	0.23	lightblue
	PEX5	0.362	0.006	7.11	1.748	lightblue
	LCB5	0.37	0.007	6.76	0.19	lightblue
	CTF8	0.382	0.017	9.12	2.09	lightblue
	PIN4	0.385	0.009	5.67	3.355	lightblue
	SRP40	0.385	0.005	9.1	0.3	lightblue
	YJL211C	0.394	0	12.1	1.58	lightblue
	MET22	0.351	0.005	7.51	0.61	lightblue
	GUS1	0.358	0.006	4.82	1.79	lightblue
	JJJ1	0.388	0.003	8.18	1.089	lightblue
	YGR050C	0.374	0.012	10.48	0.69	lightblue
	SEC23	0.37	0.009	11.6	2.568	lightblue
	CYK3	0.374	0.011	10.56	1.357	lightblue
	RPL24B	0.381	0.004	11.92	2.46	lightblue
	EAF7	0.395	0.007	8.98	0.927	lightblue
	STP1	0.368	0.007	5.47	1.265	lightblue
	YGR064W	0.357	0.005	6.17	0.125	lightblue
	YLL007C	0.392	0.009	9.77	2.926	lightblue
	YDR442W	0.382	0.007	12.22	3.545	lightblue
	PDA1	0.392	0.007	13.63	3.312	lightblue
	PEX22	0.388	0.007	13.78	3.108	lightblue
	FIS1	0.381	0.011	11.11	1.48	lightblue
	RPL26B	0.385	0.009	8.65	2.431	lightblue
	RPS0A	0.357	0.015	6.9	1.593	lightblue
	BRE5	0.37	0.01	7.46	0.784	lightblue
	RPL9B	0.368	0	10.16	0.555	lightblue
	PEX10	0.385	0.003	10.81	3.12	lightblue
	PEX15	0.393	0.007	14.14	1.245	lightblue
	LST4	0.39	0.003	9.36	0.45	lightblue
	KCH1	0.385	0.01	9.38	0.905	lightblue
	LSM7	0.378	0.002	9.36	0.845	lightblue
	URA5	0.39	0.003	9.23	1.941	lightblue
	RPS25A	0.365	0.012	11.18	2.251	lightblue
	OLA1	0.383	0.007	10.05	2.095	lightblue
	SWC5	0.385	0.014	8.78	0.238	lightblue
	SWD3	0.34	0.01	6.14	2.015	lightblue
	MGA2	0.361	0.022	8.49	1.543	lightblue
	PEX12	0.344	0.013	7.89	1.074	lightblue
	AVL9	0.368	0.009	4.52	0.325	lightblue
	YJR037W	0.377	0.011	7.11	1.856	lightblue
	SEC66	0.393	0.008	13.05	1.14	lightblue
	CYC2	0.378	0.014	10.61	3.674	lightblue
	SEA4	0.381	0.003	12.35	2.955	lightblue
	SKI3	0.368	0	9.06	2.615	lightblue
	AGE2	0.37	0.004	7.42	1.77	lightblue
	PEF1	0.383	0.015	11.26	0.313	lightblue
	RPS24B	0.379	0.008	7.71	1.506	lightblue
	PEX32	0.375	0.008	6.17	1.237	lightblue
	BIO4	0.384	0.001	11.83	1.837	lightblue
	RCO1	0.386	0.004	13.04	3.308	lightblue
	UBA3	0.387	0.001	10.61	1.532	lightblue
	OST4	0.365	0.004	9.44	0.653	lightblue
	OPI1	0.36	0.005	6.45	1.19	lightblue
	BUL1	0.372	0.004	9.02	0.898	lightblue
	MMM1	0.351	0.003	5.44	3.716	lightblue
	MGR2	0.399	0.003	13.32	2.665	lightblue
	RPS22B	0.367	0.004	8.62	4.198	lightblue
	NOP6	0.372	0.001	9.11	1.805	lightblue
	RPL4A	0.376	0.004	9.11	0.756	lightblue
	RTT106	0.354	0.006	6.61	1.019	lightblue
	YHM2	0.374	0.001	7.56	1.43	lightblue
	ARX1	0.345	0.004	6.21	3.542	lightblue
	URC2	0.363	0.003	6.57	1.45	lightblue
	SSO2	0.393	0.001	9	1.19	lightblue
	ECM8	0.392	0.005	11.33	1.768	lightblue
	FTR1	0.295	0.011	4.06	1.126	lightblue
	UBP2	0.4	0.002	10.85	1.876	lightblue
	YMR031W-A	0.361	0.01	8.13	3.389	lightblue
	RAD14	0.387	0.005	10.17	1.983	lightblue
	ARL1	0.368	0.036	8.21	3.642	lightblue
	MRN1	0.362	0.005	12.34	3.852	lightblue
	RPL16A	0.348	0.002	8.11	1.801	lightblue
	GGA2	0.383	0.009	12.45	1.078	lightblue
	RDS1	0.394	0.006	12.5	1.388	lightblue
	YDR179W-A	0.33	0.013	3.51	1.9	lightblue
	RAV2	0.39	0.006	12.77	1.419	lightblue
	SHU2	0.351	0.005	3.35	1.555	lightblue
	RPL26A	0.38	0.01	10.89	0.376	lightblue
	VPS71	0.372	0.004	12.31	3.268	lightblue
	ARO7	0.373	0.002	12.87	3.176	lightblue
	HBS1	0.358	0.007	6.03	1.958	lightblue
	DOT5	0.391	0.008	14.14	2.24	lightblue
	CYT2	0.377	0.003	12.21	0.32	lightblue
	SPO7	0.39	0.008	12.4	0.85	lightblue
	POL32	0.369	0.009	8.58	2.6	lightblue
	REC104	0.372	0.01	8.98	1.483	lightblue
	FRE6	0.385	0.009	8.82	2.889	lightblue
	FOX2	0.394	0.002	9.42	1.968	lightblue
	YLR111W	0.343	0.005	7.55	1.733	lightblue
	PMS1	0.388	0.003	9.72	1.169	lightblue
	MKC7	0.385	0.008	7.18	1.475	lightblue
	BDF1	0.36	0.007	7.11	3.049	lightblue
	SER2	0.124	0.01	0	0	lightblue
	IES6	0.331	0.004	2.75	2.755	lightblue
	HOS4	0.348	0.009	5.78	0.875	lightblue
	RPL8B	0.368	0.009	5.58	1.372	lightblue
	EDE1	0.375	0.005	5.76	5.76	lightblue
	SNC2	0.368	0.006	8.15	1.625	lightblue
	LSM1	0.391	0.008	8.86	1.155	lightblue
	URA7	0.388	0.007	8.07	3.182	lightblue
	NPR3	0.39	0.003	12.55	0.987	lightblue
	TFA2	0.366	0.003	7.77	2.388	lightblue
	KIN4	0.359	0.004	8.32	1.919	lightblue
	HTA1	0.351	0.01	5.41	1.884	lightblue
	BUD14	0.378	0.003	7.57	1.03	lightblue
	YDL157C	0.388	0.002	7.51	1.433	lightblue
	YKL075C	0.375	0.004	10.19	1.411	lightblue
	APL2	0.396	0.003	9.86	0.732	lightblue
	GET1	0.337	0	6.28	2.687	lightblue
	SEM1	0.369	0.001	9.53	1.471	lightblue
	LYS12	0.392	0.002	9.35	3.151	lightblue
	DCC1	0.38	0.003	13.94	4.837	lightblue
	ECM7	0.375	0.016	11.37	3.156	lightblue
	EFT2	0.346	0.011	5.97	0.471	lightblue
	RAD55	0.369	0.001	5.78	0.6	lightblue
	SER1	0.132	0.003	0	0	lightblue
	SAT4	0.391	0.01	12.2	2.061	lightblue
	PAM17	0.395	0.004	11.41	1.05	lightblue
	WHI2	0.358	0.005	4.99	2.025	lightblue
	RAD57	0.38	0.006	10.38	1.568	lightblue
	PSY1	0.37	0.018	7.81	0.967	lightblue
	MSI1	0.373	0.012	6.17	0.523	lightblue
	RIM15	0.388	0.013	10.54	0.875	lightblue
	PEX4	0.387	0.005	13.38	2.795	lightblue
	RAD54	0.384	0.008	13.63	2.836	lightblue
	LEO1	0.369	0.001	11.22	2.557	lightblue
	UBP15	0.382	0.01	8.39	1.897	lightblue
	BEM2	0.366	0.004	9.83	3.98	lightblue
	PIB2	0.399	0.001	8.21	1.519	lightblue
	SIS2	0.363	0.004	8.64	1.14	lightblue
	TSA1	0.374	0.003	8.31	2.17	lightblue
	YOL035C	0.389	0.008	11.45	2.668	lightblue
	UBX2	0.377	0.005	8.7	1.867	lightblue
	LIA1	0.386	0.01	10.73	1.283	lightblue
	SAM1	0.379	0.01	11.39	2.355	lightblue
	RTT101	0.39	0.005	12.15	0.423	lightblue
	BCH2	0.359	0.004	3.79	0.615	lightblue
	PPQ1	0.388	0.009	7.89	0.43	lightblue
	SYO1	0.343	0.002	5.17	2.907	lightblue
	YGR237C	0.344	0.008	5.84	2.927	lightblue
	RAD5	0.386	0.006	12.6	3.405	lightblue
	BER1	0.396	0.008	12	0.323	lightblue
	TMA22	0.384	0.002	7.69	0.17	lightblue
	GCN20	0.379	0.004	11.29	4.415	lightblue
	MUD2	0.35	0.007	7.63	1.305	lightblue
	TMA20	0.377	0.005	9.36	2.9	lightblue
	YOL050C	0.342	0.008	6.28	2.304	lightblue
	EAF6	0.394	0.009	10.13	1.118	lightblue
	SHR5	0.383	0.009	7.38	3.376	lightblue
	YLR290C	0.37	0.005	6.38	1.682	lightblue
	SWM1	0.396	0.004	7.22	2.939	lightblue
	EST2	0.363	0.011	7.12	2.053	lightblue
	SLM5	0.304	0.011	3.29	1.708	lightblue
	RPL37B	0.351	0.009	4.71	0.788	lightblue
	RPS24A	0.331	0.004	6.64	2.129	lightblue
	SNF8	0.388	0.011	10.72	2.949	lightblue
	MSY1	0.298	0.009	2.96	2.213	lightblue
	FYV7	0.314	0.003	4.41	1.585	lightblue
	HMO1	0.258	0.007	1.53	1.083	lightblue
	MRPL11	0.376	0.011	6.42	1.208	lightblue
	NAM2	0.325	0.007	0.45	0.549	lightblue
	MRPL15	0.348	0.004	2.81	1.638	lightblue
	GND1	0.151	0.015	0	0	lightblue
	YDR115W	0.292	0.003	2.21	1.644	lightblue
	NUP170	0.387	0.01	11.17	4.055	lightblue
	DAL81	0.379	0.01	8.55	3.879	lightblue
	ATP2	0.377	0.003	6.06	1.977	lightblue
	OST3	0.381	0.015	8.02	4.53	lightblue
	ATS1	0.378	0.01	10.31	2.59	lightblue
	YDR290W	0.375	0.009	7.31	1.724	lightblue
	RPL36A	0.363	0.011	3.54	3.321	lightblue
	CIN8	0.384	0.013	7.5	0.09	lightblue
	YLR202C	0.381	0.01	8.61	1.593	lightblue
	BIK1	0.386	0.012	10.53	4.65	lightblue
	ALD6	0.289	0.007	6.44	6.236	lightblue
	EGD1	0.393	0.008	11.35	0.934	lightblue
	RIM11	0.388	0.012	8.54	1.36	lightblue
	INP2	0.388	0.007	7.72	4.37	lightblue
	GCS1	0.381	0.006	7.25	2.108	lightblue
	GLC8	0.365	0.002	8.25	0.509	lightblue
	VPS62	0.376	0.004	13.38	2.045	lightblue
	SAP30	0.354	0.012	5.7	3.937	lightblue
	YMR166C	0.394	0.01	15.03	5.759	lightblue
	SPT2	0.392	0.006	7.8	4.68	lightblue
	YDL119C	0.338	0.013	2.69	1.966	lightblue
	OCA5	0.39	0.01	8.75	4.102	lightblue
	PEP1	0.372	0.018	7.68	1.962	lightblue
	VPS34	0.393	0.009	12.27	2.913	lightblue
	SKI2	0.354	0.011	5.14	0.315	lightblue
	MRPL37	0.367	0.005	8.99	4.78	lightblue
	RPL2B	0.376	0.008	8.51	0.29	lightblue
	AKR1	0.383	0.006	11.88	0.575	lightblue
	MRP10	0.382	0.007	13	1.885	lightblue
	VAN1	0.393	0.007	11.55	0.85	lightblue
	ATP5	0.332	0.002	2	0.77	lightblue
	RSM23	0.372	0.02	8.79	2.055	lightblue
	RPS27B	0.272	0.019	1.22	1.22	lightblue
	RPL14A	0.287	0.002	1.46	1.46	lightblue
	MRP20	0.364	0.014	6.92	0.35	lightblue
	YGL188C-A	0.301	0.022	2.56	1.76	lightblue
	RTG3	0.187	0.012	0.42	0.589	lightblue
	YVH1	0.394	0.01	12.6	1.791	lightblue
	ADK1	0.345	0.023	8.82	3.835	lightblue
	RPS0B	0.279	0.019	3.23	2.701	lightblue
	ISM1	0.381	0.008	12.2	1.826	lightblue
	ARP5	0.335	0.015	3.24	2.198	lightblue
	CYS4	0.128	0.001	0	0	lightblue
	RPL42B	0.316	0.018	2.53	0.853	lightblue
	MRP21	0.36	0.01	5.24	2.978	lightblue
	MGM1	0.344	0.007	5.14	0.625	lightblue
	RPL22A	0.244	0.021	0	0	lightblue
	BUD30	0.289	0.009	3.45	0.414	lightblue
	REF2	0.39	0.002	12.81	2.28	lightblue
	MSR1	0.36	0.011	8.08	2.895	lightblue
	YGR272C	0.233	0.002	0	0	lightblue
	BRO1	0.381	0.005	11.07	2.575	lightblue
	ACO2	0.394	0.008	10.73	1.57	lightblue
	VPS28	0.368	0.016	6.52	0.16	lightblue
	ADH3	0.313	0.011	4.57	4.62	lightblue
	MRP17	0.363	0.009	6.58	4.36	lightblue
	MRM1	0.365	0.006	4.37	0.305	lightblue
	YGL218W	0.4	0.002	15.85	4.674	lightblue
	VMA7	0.173	0.001	0	0	lightblue
	CYC3	0.371	0.003	8.98	0.235	lightblue
	AIM10	0.197	0.002	0	0	lightblue
	PDX3	0.265	0.018	2.89	1.694	lightblue
	DSS1	0.367	0.009	4.96	1.868	lightblue
	TIF4632	0.368	0.012	8.63	3.318	lightblue
	UME6	0.354	0.013	10.57	1.895	lightblue
	SWS2	0.356	0.004	12.96	3.65	lightblue
	SFP1	0.195	0.02	0.52	0.735	lightblue
	OCT1	0.363	0.009	7.58	4.834	lightblue
	RRG1	0.315	0.01	2.15	2.155	lightblue
	GRX5	0.191	0.024	0.31	0.226	lightblue
	RPS1B	0.39	0.011	11.25	1.36	lightblue
	SIT4	0.187	0.008	0.75	1.065	lightblue
	VPS33	0.365	0.014	6.5	4.863	lightblue
	MSD1	0.358	0.006	4.07	0.845	lightblue
	GAL11	0.366	0.002	8.06	4.02	lightblue
	IMG1	0.374	0.013	5.7	4.124	lightblue
	VPS20	0.365	0.01	9.81	2.635	lightblue
	TUF1	0.348	0.018	3.66	1.059	lightblue
	MRPL40	0.359	0.01	6.06	0.463	lightblue
	MRPS16	0.327	0.015	3.24	2.188	lightblue
	RSM24	0.36	0.009	5.91	2.428	lightblue
	MRPL32	0.351	0.012	5.93	1.916	lightblue
	MRPL35	0.352	0.006	3.82	2.668	lightblue
	YGR219W	0.34	0.008	4.57	2.444	lightblue
	TRM7	0.383	0.005	12.37	0.891	lightblue
	DIA4	0.369	0.006	8.06	0.602	lightblue
	PFK1	0.369	0.007	9.07	2.333	lightblue
	RPS8A	0.256	0.019	1.35	0.965	lightblue
	HER2	0.361	0.007	5.21	0.821	lightblue
	MRP4	0.361	0.003	5.3	1.106	lightblue
	MHR1	0.361	0.001	8.66	1.485	lightblue
	MSM1	0.351	0.002	7.34	3.434	lightblue
	CSG2	0.394	0.009	10.43	2.092	lightblue
	RSM27	0.339	0.013	7.02	0.837	lightblue
	MRPS35	0.363	0.004	6.38	1.935	lightblue
	ILV1	0.375	0.004	11.36	1.105	lightblue
	ZUO1	0.288	0.007	3.49	0.593	lightblue
	PET112	0.358	0.007	8.74	4.004	lightblue
	TCO89	0.384	0.003	9.44	2.242	lightblue
	RPP2B	0.281	0.002	4.2	2.099	lightblue
	MRPL20	0.372	0.009	5.11	0.16	lightblue
	MTG1	0.299	0.021	3.01	2.925	lightblue
	VPS63	0.353	0.007	5.78	0.66	lightblue
	LRP1	0.329	0.007	5.72	1.602	lightblue
	MTQ2	0.384	0.006	13.45	0.045	lightblue
	VMA2	0.365	0.012	9	2.704	lightblue
	MRPL36	0.321	0.009	3.11	1.678	lightblue
	MRPS12	0.349	0.015	6.38	2.68	lightblue
	GEP5	0.335	0.003	3.26	2.076	lightblue
	ARG7	0.389	0.009	13.06	0.66	lightblue
	ILM1	0.291	0.011	6.08	5.34	lightblue
	MRPL33	0.366	0.004	8.27	2.364	lightblue
	MEF1	0.304	0.007	4.24	0.664	lightblue
	MSW1	0.352	0.018	9.42	2.768	lightblue
	VPS16	0.202	0.017	0	0	lightblue
	NAT1	0.36	0.013	5.28	2.111	lightblue
	RPB9	0.268	0.01	3.32	2.36	lightblue
	ZRT1	0.295	0.022	1.72	1.306	lightblue
	RPS28B	0.308	0.011	5.75	0.335	lightblue
	CKB2	0.322	0.007	7.38	7.385	lightblue
	HOM3	0.388	0.004	8.26	4.507	lightblue
	MRPL49	0.367	0.01	10.57	2.487	lightblue
	RPS7A	0.256	0.004	3.51	2.558	lightblue
	RRG7	0.379	0.006	14.66	6.978	lightblue
	SNF5	0.216	0.037	2.81	2.81	lightblue
	RPS23B	0.393	0	13.11	2.76	lightblue
	MRPL23	0.311	0.001	2.5	0.725	lightblue
	SPT4	0.162	0.011	0	0	lightblue
	RPS18A	0.331	0.008	4.38	1.379	lightblue
	MRF1	0.365	0.011	4.73	1.02	lightblue
	SOV1	0.357	0.01	4.89	1.925	lightblue
	MET18	0.307	0.013	5.44	0.29	lightblue
	MRPL4	0.364	0.014	6.29	2.135	lightblue
	UGO1	0.204	0.006	0.23	0.321	lightblue
	RSM19	0.338	0.003	6.89	1.402	lightblue
	YIL060W	0.393	0.005	12.16	5.911	lightblue
	PEP7	0.251	0.006	0	0	lightblue
	SCO1	0.333	0.023	13.65	13.655	lightblue
	RSM7	0.257	0.015	3.51	2.612	lightblue
	UPS1	0.36	0.013	9.64	3.559	lightblue
	VPS41	0.289	0.01	2.99	3.947	lightblue
	HAP4	0.357	0.023	9.3	5.69	lightblue
	RPP1A	0.319	0.006	6.61	2.91	lightblue
	ERG2	0.383	0.002	8.07	1.61	lightblue
	PAP2	0.39	0.002	8.66	2.365	lightblue
	VPS8	0.374	0.003	8.18	1.15	lightblue
	MDM10	0.226	0.013	3.88	3.875	lightblue
	RPL19A	0.336	0.007	6.47	0.866	lightblue
	MRPS9	0.394	0.007	12.14	0.88	lightblue
	STP22	0.378	0.002	12.23	1.465	lightblue
	DHH1	0.366	0.004	9.76	2.501	lightblue
	KCS1	0.306	0.005	6.05	2.775	lightblue
	TPS2	0.377	0.004	13.09	3.318	lightblue
	RPL12B	0.359	0.005	4.7	2.255	lightblue
	SLX8	0.372	0.007	7.66	0.776	lightblue
	RPL40A	0.361	0.011	7.36	0.09	lightblue
	COX16	0.393	0.004	14.89	1.84	lightblue
	ARG2	0.386	0.008	8.67	3.9	lightblue
	ATP7	0.23	0.012	0.07	0.104	lightblue
	YKL069W	0.383	0.004	14.54	3.935	lightblue
	RPL6B	0.323	0.013	5.27	1.55	lightblue
	YNL170W	0.256	0.011	5.23	3.516	lightblue
	RTG1	0.17	0.008	0	0	lightblue
	RPS19A	0.335	0.011	5.82	1.163	lightblue
	SPE1	0.128	0.011	0	0	lightblue
	NOP12	0.336	0.008	6.85	0.165	lightblue
	RPS17B	0.382	0.013	6.32	2.141	lightblue
	LHS1	0.38	0.011	9.07	2.339	lightblue
	FPR1	0.381	0.02	8.85	2.109	lightblue
	CBP2	0.375	0	11.3	0.235	lightblue
	AIM4	0.337	0.001	4.1	1.805	lightblue
	YPL260W	0.303	0.016	0.99	0.99	lightblue
	COX13	0.378	0.007	3.63	3.635	lightblue
	SEO1	0.385	0.008	11.73	2.74	lightblue
	USA1	0.388	0.004	12.85	2.262	lightblue
	CUS2	0.395	0.005	10.52	2.131	lightblue
	YPL113C	0.388	0.001	10.22	2.588	lightblue
	CTS2	0.392	0.009	13.51	2.662	lightblue
	FIR1	0.389	0.006	8.55	0.92	lightblue
	BDH1	0.391	0.002	10.43	0.971	lightblue
	PSR2	0.394	0.005	11.55	3.246	lightblue
	YML020W	0.39	0.01	9.19	2.049	lightblue
	ICY1	0.393	0.005	9.87	2.425	lightblue
	TMC1	0.395	0.006	11.44	2.346	lightblue
	PFA4	0.393	0.001	11.43	1.18	lightblue
	AFT2	0.391	0.008	10.43	0.96	lightblue
	SMP1	0.391	0.007	10.32	2.024	lightblue
	SIZ1	0.386	0.006	12.73	2.504	lightblue
	YER034W	0.391	0.011	11.08	1.697	lightblue
	YAP1	0.372	0.007	7.17	0.945	lightblue
	YOR062C	0.385	0.005	12.22	1.525	lightblue
	LAG2	0.389	0.01	10.11	1.568	lightblue
	REV3	0.391	0.01	10.7	0.9	lightblue
	DFM1	0.39	0.012	9.96	2.326	lightblue
	GPP2	0.389	0.012	9.97	1.708	lightblue
	TRM12	0.389	0.008	8.16	0.76	lightblue
	YMR226C	0.395	0.006	9.94	1.134	lightblue
	RTC4	0.395	0.007	8.83	1.695	lightblue
	YOL085C	0.391	0.006	8.78	0.748	lightblue
	KIP2	0.386	0.007	9.86	2.06	lightblue
	YPT10	0.389	0.006	9.41	2.967	lightblue
	UBC7	0.385	0.008	6.79	0.155	lightblue
	TRI1	0.396	0.004	11.19	0.818	lightblue
	YPL247C	0.397	0.008	9.94	1.515	lightblue
	ISU1	0.387	0.006	7.99	0.886	lightblue
	THI4	0.396	0.004	8.66	2.542	lightblue
	BCH1	0.393	0.004	8.61	1.519	lightblue
	YOR029W	0.397	0.004	9.98	3.403	lightblue
	HSP82	0.389	0.005	11.36	1.118	lightblue
	RNY1	0.392	0.005	8.15	0.589	lightblue
	MDM36	0.384	0.004	10.47	2.571	lightblue
	PBP1	0.394	0.004	8.09	0.778	lightblue
	YML082W	0.391	0.012	11.58	1.524	lightblue
	CUE1	0.391	0.007	10.08	2.695	lightblue
	UBC11	0.382	0.009	7.71	0.425	lightblue
	FLC1	0.39	0.004	11.33	0.618	lightblue
	MEI5	0.394	0.008	9.6	0.99	lightblue
	GIS1	0.389	0.006	9.34	0.005	lightblue
	NVJ2	0.388	0.006	9.66	1.595	lightblue
	TDA10	0.39	0.007	10.1	2.116	lightblue
	PSR1	0.387	0.013	11.79	2.622	lightblue
	PGC1	0.379	0.022	8.85	0.748	lightblue
	DBP1	0.375	0.016	11.8	1.015	lightblue
	YLF2	0.387	0.021	7.46	2.627	lightblue
	DOG2	0.388	0.002	11.44	0.85	lightblue
	MNL1	0.391	0.008	12.38	0.384	lightblue
	MAK32	0.391	0.004	11.66	0.916	lightblue
	CRR1	0.385	0.011	8.94	1.946	lightblue
	PNS1	0.388	0.007	11.58	0.417	lightblue
	JJJ2	0.381	0.013	12.74	3.276	lightblue
	MRS3	0.382	0.013	9.84	2.086	lightblue
	STE3	0.39	0.006	11.75	1.642	lightblue
	TWF1	0.389	0.007	11.91	1.704	lightblue
	YJL218W	0.394	0.004	10.96	1.253	lightblue
	CIS3	0.395	0.004	10.84	0.634	lightblue
	YOR097C	0.398	0.003	13.04	1.472	lightblue
	REE1	0.398	0.005	9.09	2.272	lightblue
	FAR1	0.394	0.002	8.26	2.694	lightblue
	NUP2	0.388	0.004	8.65	1.887	lightblue
	YJL215C	0.394	0.004	10.57	2.173	lightblue
	NIT3	0.395	0.002	8.74	0.191	lightblue
	FMP48	0.4	0.002	11.75	2.518	lightblue
	RGS2	0.399	0.003	10.49	1.963	lightblue
	SKG3	0.395	0.003	11.61	2.138	lightblue
	YJL144W	0.397	0.005	9.59	0.732	lightblue
	PSY3	0.397	0.007	12.48	1.968	lightblue
	RED1	0.399	0.002	11.26	1.697	lightblue
	YCR001W	0.397	0.005	14.49	3.294	lightblue
	ENT2	0.397	0.001	11.86	0.699	lightblue
	MSN4	0.397	0.002	13.52	1.416	lightblue
	YGR067C	0.398	0.004	9.98	2.865	lightblue
	ORT1	0.389	0.006	10.28	1.333	lightblue
	MNN5	0.398	0.003	9.37	0.323	lightblue
	YJL135W	0.399	0.003	10.73	3.137	lightblue
	RUP1	0.393	0.005	11.33	1.308	lightblue
	ATG36	0.383	0.003	7.58	1.55	lightblue
	SLZ1	0.398	0.002	13.93	3.022	lightblue
	SNL1	0.394	0.004	10.43	1.258	lightblue
	PCL7	0.39	0.008	8.9	0.736	lightblue
	NAS2	0.371	0.006	8.51	1.535	lightblue
	PRX1	0.395	0.006	9.8	2.18	lightblue
	YIL028W	0.371	0.008	8.78	1.872	lightblue
	YHR045W	0.394	0.006	10.77	1.205	lightblue
	HIM1	0.398	0.003	11.19	0.479	lightblue
	YIL029C	0.369	0.003	8.36	2.762	lightblue
	SPO22	0.369	0.005	8.27	1.025	lightblue
	ATE1	0.389	0.005	13.4	1.78	lightblue
	ZWF1	0.383	0.005	11.4	0.34	lightblue
	SKO1	0.4	0	12.63	2.98	lightblue
	YIL001W	0.387	0.008	14.39	3.795	lightblue
	YIL032C	0.387	0.006	10.62	1.388	lightblue
	YIL077C	0.359	0.001	10.16	1.76	lightblue
	YGR266W	0.387	0.002	12.33	0.87	lightblue
	TSL1	0.383	0.005	9.88	1.56	lightblue
	YJR128W	0.394	0.005	8.86	1.574	lightblue
	ARR1	0.388	0.004	12.64	0.488	lightblue
	YNL211C	0.385	0.004	8.5	2.603	lightblue
	YKR047W	0.395	0.003	8.34	0.6	lightblue
	PRM2	0.389	0.008	11.31	2.874	lightblue
	YAP5	0.389	0.001	12.78	0.657	lightblue
	YKU80	0.378	0.001	9.61	1.827	lightblue
	YGR226C	0.374	0.01	9.87	1.867	lightblue
	PNC1	0.374	0.012	11.21	1.351	lightblue
	YNL205C	0.379	0.012	10.77	0.665	lightblue
	MRS4	0.364	0.017	10.16	0.45	lightblue
	CBR1	0.367	0.012	6.53	1.343	lightblue
	IRC21	0.375	0.011	8.7	0.726	lightblue
	YPR012W	0.375	0.008	11.45	1.411	lightblue
	SIP18	0.377	0.016	9.35	3.318	lightblue
	XBP1	0.389	0.011	12.21	1.952	lightblue
	PCA1	0.388	0.006	9.39	1.84	lightblue
	YDL009C	0.392	0.01	7.5	1.525	lightblue
	MET3	0.397	0.005	12.22	2.605	lightblue
	ATG32	0.39	0.005	12.19	2.486	lightblue
	RRT16	0.393	0.006	13.12	1.588	lightblue
	YDL012C	0.39	0.007	11.98	3.19	lightblue
	RHB1	0.388	0.002	14.67	1.52	lightblue
	ALG12	0.388	0.006	11.48	2.581	lightblue
	POT1	0.4	0.003	10.8	1.84	lightblue
	YNL115C	0.395	0.006	11.93	3.362	lightblue
	SSK2	0.383	0.004	10.5	2.011	lightblue
	YIL161W	0.397	0.003	11.79	2.091	lightblue
	BPH1	0.393	0.008	9.66	3.015	lightblue
	MSN2	0.398	0.003	13.98	3.187	lightblue
	RTK1	0.382	0.001	8.2	1.555	lightblue
	CMR1	0.394	0.005	12	0.672	lightblue
	YDR445C	0.394	0.003	11.29	1.241	lightblue
	ERS1	0.398	0.001	10.49	2.81	lightblue
	YBR277C	0.373	0.004	13.82	2.78	lightblue
	SOL2	0.382	0.007	11.73	1.26	lightblue
	KSS1	0.391	0.007	11.45	1.54	lightblue
	SSK1	0.382	0.005	11.98	1.489	lightblue
	NRP1	0.342	0.009	5.55	0.851	lightblue
	HTB2	0.33	0.018	2.93	2.273	lightblue
	CPR7	0.299	0.002	12.01	1.43	magenta
	UBP3	0.306	0.01	5.6	0.441	magenta
	IXR1	0.356	0.01	15.23	2.314	magenta
	DST1	0.356	0.006	10.19	1.527	magenta
	MRE11	0.356	0.01	18.32	2.515	magenta
	NBP2	0.337	0.01	16.64	2.896	magenta
	BUD26	0.343	0.015	9.86	1.636	magenta
	COR1	0.38	0.012	15.38	2.535	magenta
	SLA1	0.357	0.018	14.12	1.41	magenta
	SIN3	0.328	0.006	18.75	2.24	magenta
	RPS6A	0.349	0.014	8.66	0.9	magenta
	VMA13	0.311	0.008	25.09	0.428	magenta
	ARC18	0.339	0.007	10.79	0.873	magenta
	DOC1	0.226	0.008	4.37	3.006	magenta
	HTZ1	0.351	0.009	17.51	1.586	magenta
	COQ8	0.383	0.01	13.14	1.877	magenta
	IKI3	0.328	0.015	14.82	1.951	magenta
	COX10	0.383	0.011	16.24	1.144	magenta
	POR1	0.367	0.012	30.9	2.353	magenta
	RPL34A	0.376	0.008	13.95	2.437	magenta
	RIM13	0.381	0.009	13.51	1.959	magenta
	TPN1	0.344	0.015	18.43	3.409	magenta
	MRS1	0.383	0.01	16.24	2.75	magenta
	NHP10	0.389	0.01	17.16	1.85	magenta
	CEM1	0.352	0.01	10.99	0.895	magenta
	SAC3	0.306	0.009	9.87	1.9	magenta
	CBP1	0.364	0.013	16.86	1.664	magenta
	IDH1	0.201	0.004	3.68	0.493	magenta
	TRK1	0.388	0.003	29.73	1.595	magenta
	CBP3	0.383	0.002	15.41	2.267	magenta
	DID4	0.367	0.012	15.61	0.345	magenta
	RPS6B	0.324	0.007	6.07	0.586	magenta
	RPN4	0.346	0.003	9.84	2.049	magenta
	COX18	0.373	0.005	16.81	1.886	magenta
	HTD2	0.362	0.013	16.49	1.39	magenta
	MRT4	0.3	0.017	5.32	1.946	magenta
	RIM101	0.373	0.006	25.49	1.199	magenta
	SMI1	0.394	0.004	13.67	1.295	magenta
	MED1	0.311	0.011	13.62	1.057	magenta
	YPL102C	0.326	0.007	9.42	0.809	magenta
	IES2	0.331	0.001	9.02	1.25	magenta
	VPS64	0.357	0.003	13.29	0.92	magenta
	VAM7	0.339	0.013	15.72	1.956	magenta
	SSN2	0.374	0.022	13.06	1.44	magenta
	SLM3	0.342	0.019	10.17	0.94	magenta
	HDA2	0.332	0.009	8.36	0.28	magenta
	MSS51	0.376	0.009	20.97	0.89	magenta
	VMA3	0.229	0.018	12.7	3.385	magenta
	IDH2	0.208	0.005	6.52	0.045	magenta
	GLN3	0.302	0.006	8.22	2.2	magenta
	COX19	0.384	0.004	22.1	2.73	magenta
	BUB3	0.354	0.012	19.32	1.76	magenta
	YTA7	0.365	0.008	19.02	2.175	magenta
	FKS1	0.376	0.002	18.08	3.71	magenta
	YNL171C	0.301	0.004	14.83	2.846	magenta
	CTK1	0.35	0.013	21.2	4.365	magenta
	URE2	0.305	0.022	16.88	3.352	magenta
	HUR1	0.321	0.013	11.7	1.545	magenta
	NSR1	0.272	0.014	5.79	1.995	magenta
	END3	0.289	0.016	5.09	1.059	magenta
	IES3	0.39	0.008	22.84	0.95	magenta
	IRC13	0.385	0.01	16.97	2.41	magenta
	MNE1	0.359	0	19.53	1.07	magenta
	GCV3	0.374	0.015	15.39	2.15	magenta
	PET100	0.358	0.006	16.55	0.125	magenta
	MKS1	0.204	0.01	4.79	1.505	magenta
	MAP1	0.232	0.002	5.83	1.595	magenta
	YPL080C	0.362	0.002	12.98	2.84	magenta
	CTF4	0.336	0.01	9.2	1.571	magenta
	ELP4	0.349	0.001	12.48	0.535	magenta
	RPS29B	0.32	0	8.91	1.32	magenta
	SPE3	0.282	0.005	9.98	0.355	magenta
	CBP6	0.383	0.012	20.86	1.25	magenta
	SHE9	0.344	0.009	14.18	1.29	magenta
	CTF18	0.393	0.002	16.18	0.24	magenta
	MRPL24	0.385	0.001	23.55	0.165	magenta
	AAH1	0.269	0.014	6.9	1.843	magenta
	RTG2	0.209	0.004	3.96	3.524	magenta
	COX9	0.368	0.007	22.13	2.362	magenta
	PHO80	0.342	0.012	12.41	0.355	magenta
	TGS1	0.344	0.005	13.77	1.595	magenta
	UBP6	0.391	0.002	14.62	0.025	magenta
	MRPL51	0.355	0.006	12.96	1.5	magenta
	COQ5	0.286	0.003	7.87	2.645	magenta
	PAC10	0.386	0.007	17.09	1.315	magenta
	SPE2	0.269	0.011	8.23	0.85	magenta
	YPT7	0.383	0.006	18.94	1.47	magenta
	COA3	0.378	0.003	24.8	0.095	magenta
	STO1	0.325	0.004	12.67	1.78	magenta
	OPI11	0.233	0.004	4.44	1.275	magenta
	COA2	0.371	0.009	14.03	0.213	magenta
	SST2	0.377	0.007	15.43	3.562	magenta
	YFL013W-A	0.389	0.004	15.16	2.503	magenta
	VID22	0.371	0.011	14.93	1.671	magenta
	COX5A	0.382	0.01	14.34	2.866	magenta
	MSC1	0.39	0.008	25.32	3.62	magenta
	SKY1	0.314	0.007	7.65	0.659	magenta
	CRD1	0.327	0.01	11.83	2.345	magenta
	EXO1	0.397	0.005	17.25	1.962	magenta
	PRE9	0.363	0.007	14.83	3.286	magenta
	PUB1	0.383	0.007	23.87	2.515	magenta
	YML010C-B	0.344	0	10.08	1.469	magenta
	SPT8	0.345	0.011	12.56	3.182	magenta
	LSM6	0.333	0.006	10.4	1.036	magenta
	NUP120	0.316	0.009	15.75	1.416	magenta
	APQ12	0.324	0.016	7.54	1.345	magenta
	MOG1	0.326	0.003	20.46	0.763	magenta
	SGS1	0.384	0.014	14.63	1.108	magenta
	THP3	0.309	0.007	8.97	1.364	magenta
	RPL29	0.375	0.003	13.2	1.445	magenta
	RMI1	0.378	0.013	22.89	2.423	magenta
	MMR1	0.373	0.006	34.38	0.575	magenta
	TOM1	0.328	0.004	10.6	1.32	magenta
	CBT1	0.39	0.01	17.9	2.452	magenta
	RPL35B	0.333	0.005	8.78	1.436	magenta
	BUD19	0.232	0.007	3.74	0.901	magenta
	KTI12	0.35	0.009	13.09	1.2	magenta
	TEF4	0.335	0.007	12.73	1.433	magenta
	GIS4	0.392	0.006	18.25	2.033	magenta
	BUD27	0.291	0.003	5.9	0.605	magenta
	RPL23A	0.345	0.003	9.56	1.735	magenta
	DEP1	0.332	0.003	7.57	1.046	magenta
	CDH1	0.354	0.013	25.42	3.302	magenta
	RAD51	0.346	0.008	14.22	4.722	magenta
	LDB18	0.343	0.015	12.03	0.253	magenta
	NUT1	0.372	0.014	21.15	2.07	magenta
	YPL062W	0.29	0.015	9.77	1.292	magenta
	LYS9	0.389	0.001	13.52	1.38	magenta
	CYT1	0.376	0.001	18.73	0.76	magenta
	YLR235C	0.334	0.004	14.54	1.965	magenta
	RAD50	0.328	0.003	15.79	2.621	magenta
	TOP3	0.368	0.015	14.24	2.338	magenta
	POP2	0.319	0.002	21.5	3.105	magenta
	PMA2	0.379	0.008	16.82	0.99	magenta
	BRP1	0.316	0.003	9.66	1.595	magenta
	ERG4	0.388	0.009	15.52	1.995	magenta
	CCZ1	0.395	0.003	19.71	0.701	magenta
	GEM1	0.326	0.017	8.45	2.694	magenta
	RPA14	0.36	0.002	12.59	1.395	magenta
	UTH1	0.365	0.004	14.55	2.98	magenta
	NKP2	0.373	0.006	15.85	2.485	magenta
	DFG16	0.393	0.009	17.85	1.848	magenta
	SGF29	0.359	0.01	13.47	1.209	magenta
	PET122	0.377	0.011	17.74	0.165	magenta
	YGL072C	0.344	0.008	18.5	0.25	magenta
	PEX8	0.34	0.019	15.9	2.443	magenta
	YLR402W	0.336	0.001	12.03	3.4	magenta
	PEX13	0.38	0.006	12.73	1.167	magenta
	ABF2	0.36	0.002	14.38	0.665	magenta
	POC4	0.375	0.001	21.8	2.41	magenta
	MON1	0.384	0.004	21.6	0.23	magenta
	RPL40B	0.386	0.011	15.52	1.468	magenta
	MDL2	0.37	0.013	12.49	1.5	magenta
	GIM3	0.373	0.006	23.39	3.074	magenta
	URM1	0.334	0.012	10.22	1.74	magenta
	SSF1	0.356	0.007	10.83	0.367	magenta
	TRM9	0.355	0.01	10.4	0.879	magenta
	COX7	0.367	0.012	22.25	3.615	magenta
	DOA1	0.378	0.011	14.36	2.105	magenta
	QCR8	0.391	0.01	17.11	0.99	magenta
	FMC1	0.33	0.016	11.83	2.943	magenta
	MDM38	0.384	0.01	29.24	1.978	magenta
	RPL27B	0.352	0.009	12.08	1.546	magenta
	RAD52	0.343	0.007	14.52	2.659	magenta
	PEP8	0.368	0.017	13.6	2.477	magenta
	RPL24A	0.347	0.006	11.5	1.961	magenta
	YGL046W	0.389	0.004	16.73	1.275	magenta
	HDA1	0.386	0.002	17.61	0.27	magenta
	PET54	0.379	0.01	20.62	0.555	magenta
	YGR039W	0.388	0.01	13.97	0.449	magenta
	RAM1	0.367	0.002	13.82	0.505	magenta
	IFM1	0.37	0.008	14.76	1.662	magenta
	ELO3	0.356	0.009	13.2	2.609	magenta
	YBL100C	0.388	0.013	20.4	4.789	magenta
	BCS1	0.386	0.011	23.55	0.699	magenta
	EMI1	0.367	0.011	31.1	1.059	magenta
	YBR174C	0.319	0.002	5.89	0.368	magenta
	PEX14	0.364	0.016	13.13	2.984	magenta
	PHO86	0.341	0.013	11.54	1.404	magenta
	ARO2	0.287	0.014	6.3	0.63	magenta
	IST3	0.323	0.001	7.69	1.785	magenta
	PUF6	0.376	0.008	13.82	2.055	magenta
	EAP1	0.333	0.005	35.84	10.756	magenta
	PEX2	0.368	0.021	18.77	2.755	magenta
	COX11	0.356	0.013	18.32	1.808	magenta
	COQ3	0.379	0.007	21.77	0.55	magenta
	YCL062W	0.369	0.013	15.95	0.3	magenta
	VPS72	0.38	0.006	14.15	3.354	magenta
	YLR374C	0.366	0.01	13.15	2.644	magenta
	WSS1	0.371	0.01	14.66	4.291	magenta
	SLO1	0.389	0.007	13.81	0.653	magenta
	PBY1	0.367	0.007	13.56	2.544	magenta
	CCW12	0.287	0.004	4.87	0.29	magenta
	CSF1	0.313	0.008	15.16	5.787	magenta
	DYN1	0.395	0.005	14.33	1.625	magenta
	SKI8	0.366	0.004	14.12	2.014	magenta
	YBR100W	0.373	0.006	12.27	0.924	magenta
	TIM11	0.391	0.005	51.89	5.921	magenta
	ALT1	0.354	0.005	28.87	2.913	magenta
	SET2	0.325	0.002	7.57	0.747	magenta
	SWM2	0.367	0.009	12.94	1.505	magenta
	FUS3	0.382	0	15.35	1.22	magenta
	RTR1	0.352	0.002	16.06	1.08	magenta
	EGD2	0.39	0.003	29.17	1.646	magenta
	RPE1	0.385	0.004	13.78	0.931	magenta
	YKR051W	0.376	0.006	14.51	2.31	magenta
	DUN1	0.37	0.004	17.7	1.484	magenta
	ESC2	0.371	0.007	14.35	2.224	magenta
	YLR264C-A	0.324	0.007	12.71	3.209	magenta
	GMC2	0.302	0.003	6.68	2.398	magenta
	YDR203W	0.355	0.004	12.37	1.544	magenta
	SIF2	0.347	0.013	17.54	3.555	magenta
	YLR363W-A	0.369	0.014	18.27	0.773	magenta
	MIC19	0.365	0.007	23.87	1.917	magenta
	VPS55	0.381	0.006	17.61	1.035	magenta
	RPL43B	0.287	0.006	10.67	1.405	magenta
	ERF2	0.366	0.009	12.29	0.651	magenta
	SUS1	0.391	0.003	22.42	5.434	magenta
	LDB19	0.349	0.002	10.95	1.99	magenta
	SAC7	0.371	0.005	14.31	3.643	magenta
	FPS1	0.358	0.015	12.59	1.51	magenta
	FRA2	0.341	0.012	8.05	0.763	magenta
	BIM1	0.344	0.005	23.04	4.637	magenta
	MIC27	0.393	0.009	19.84	0.455	magenta
	TRS65	0.386	0.002	16.83	1.843	magenta
	GCN1	0.398	0.005	16.52	0.671	magenta
	IRC25	0.396	0.004	16.04	3.641	magenta
	COQ10	0.394	0.004	16.57	3.705	magenta
	NEM1	0.38	0.002	15.46	2.555	magenta
	AIM29	0.358	0.009	11.25	1.982	magenta
	VPS3	0.296	0.008	11.42	6.056	magenta
	ICE2	0.399	0.005	23.72	4.498	magenta
	ARV1	0.363	0.006	11.2	2.177	magenta
	YEL045C	0.182	0.013	1.61	2.277	magenta
	PEP12	0.292	0.004	12.5	0.785	magenta
	VPS65	0.319	0.007	7.48	2.062	magenta
	PEP5	0.378	0.002	16.36	0.695	magenta
	RRP6	0.345	0.006	10.57	0.225	magenta
	SHP1	0.323	0.02	13.97	0.24	magenta
	PRO2	0.337	0.005	15.3	1.01	magenta
	RAI1	0.283	0.025	4.59	0.255	magenta
	RPS9B	0.278	0.025	6.64	1.89	magenta
	AAT2	0.269	0.015	5.07	0.03	magenta
	MRPS8	0.335	0.006	19.07	3.285	magenta
	YGL007C-A	0.376	0.01	17.07	2.684	magenta
	THP1	0.271	0.023	11.46	0.4	magenta
	EOS1	0.284	0.021	6.57	1.242	magenta
	GEP4	0.367	0.007	38.52	2.465	magenta
	SNF7	0.362	0.012	11.28	2.262	magenta
	SLS1	0.319	0.004	7.02	0.559	magenta
	SIC1	0.335	0.009	22.77	2.988	magenta
	ADA2	0.267	0.01	5.6	1.854	magenta
	RNR1	0.247	0.014	6.48	1.539	magenta
	HCR1	0.273	0.014	4.36	1.368	magenta
	VPS54	0.36	0.012	12.12	0.835	magenta
	MEF2	0.34	0.01	8.69	2.341	magenta
	MOT2	0.196	0.017	1.42	1.57	magenta
	OPI9	0.351	0.012	14.88	0.41	magenta
	NGG1	0.263	0.011	5.97	0.714	magenta
	BUD16	0.319	0.009	11.1	3.146	magenta
	BUD31	0.315	0.004	8.92	1.235	magenta
	MDM31	0.388	0.003	15.9	2.149	magenta
	EAF1	0.357	0.005	12.53	5.154	magenta
	ARD1	0.351	0.003	17.49	3.606	magenta
	RIM1	0.253	0.008	4.69	1.455	magenta
	PRO1	0.325	0.014	7.18	1.575	magenta
	POS5	0.328	0.01	8.3	0.344	magenta
	ATP1	0.343	0.004	16.25	4.194	magenta
	LOC1	0.261	0.001	7.12	3.308	magenta
	MRPL16	0.314	0.005	5.54	1.177	magenta
	MSF1	0.372	0.002	13.05	1.335	magenta
	SNT309	0.294	0.006	8.6	2.243	magenta
	RSC2	0.365	0.008	15.05	0.305	magenta
	XRN1	0.318	0.008	10.38	2.493	magenta
	SPT21	0.308	0.003	9.19	1.046	magenta
	ARG82	0.396	0.006	18.78	2.205	magenta
	MET7	0.313	0.005	7.71	0.491	magenta
	VPS25	0.373	0.01	14.88	1.545	magenta
	ARC1	0.303	0.005	5.28	1.415	magenta
	SSQ1	0.243	0.01	2.76	0.706	magenta
	PET111	0.386	0.017	16.21	4.307	magenta
	CIK1	0.371	0.019	23.45	1.635	magenta
	HEL2	0.385	0.004	22.01	0.04	magenta
	RPS7B	0.389	0.001	20.43	4.36	magenta
	NPL3	0.278	0.012	21.48	4.725	magenta
	RVS167	0.388	0.003	27.2	2.675	magenta
	MDM12	0.315	0.017	11.46	5.94	magenta
	RPS16A	0.318	0.016	11.38	3.098	magenta
	DOA4	0.381	0.008	19.75	4.605	magenta
	NUP84	0.317	0.008	15.35	2.494	magenta
	MTF1	0.336	0.001	9.12	0.375	magenta
	BUD21	0.283	0.012	6.6	0.39	magenta
	YMR242W-A	0.317	0.006	8.02	1.678	magenta
	MGM101	0.364	0.003	14.46	0.025	magenta
	SAC1	0.319	0.016	7.99	1.515	magenta
	ATP15	0.198	0.003	1.94	1.381	magenta
	KRE28	0.278	0.017	17.8	3.034	magenta
	YML090W	0.378	0.014	17.42	2.769	magenta
	MRPL7	0.355	0.005	14.64	4.71	magenta
	CDC50	0.341	0.011	11.39	1.375	magenta
	CCM1	0.375	0.003	18.48	1.255	magenta
	ADO1	0.317	0.002	10.12	1.756	magenta
	NAT3	0.294	0.009	6.66	1.622	magenta
	VPH1	0.38	0.008	13.29	0.873	magenta
	RPS11A	0.371	0.001	13.12	3.147	magenta
	LEA1	0.389	0.002	21.73	5.21	magenta
	SSZ1	0.29	0.017	8.75	1.055	magenta
	MRPL9	0.351	0.01	22.69	2.48	magenta
	RSM22	0.307	0.008	6.88	0.375	magenta
	MRPL25	0.302	0.005	5.77	0.73	magenta
	HPM1	0.358	0.007	19.34	6.405	magenta
	PHO88	0.357	0.008	14.02	1.465	magenta
	SLM6	0.263	0.003	5.86	1.59	magenta
	RPL35A	0.196	0.012	2.57	2.735	magenta
	CBS2	0.378	0.007	16.61	0.67	magenta
	COX20	0.34	0.015	11.88	1.121	magenta
	PET117	0.382	0.01	17.23	1.037	magenta
	COX15	0.368	0.01	16.86	1.69	magenta
	ELP2	0.327	0.01	7.88	2.205	magenta
	COX6	0.366	0.013	12.56	1.843	magenta
	COX23	0.38	0.007	18.57	1.58	magenta
	ATP14	0.388	0.011	15.83	2.354	magenta
	MMS22	0.324	0.016	19.24	3.165	magenta
	VPS9	0.346	0.009	13.95	0.975	magenta
	PKR1	0.324	0.009	8	0.32	magenta
	RPL13B	0.243	0.018	3.52	2.49	magenta
	AEP2	0.375	0.013	16.41	2.245	magenta
	ELP6	0.31	0.008	15.54	3.31	magenta
	THO2	0.35	0.007	10.96	1.54	magenta
	MDM20	0.274	0.016	14.84	0.15	magenta
	VPS5	0.382	0.018	27.42	1.593	magenta
	ATP4	0.361	0.004	12.38	2.07	magenta
	YPL205C	0.356	0.019	12.25	0.515	magenta
	COQ4	0.365	0.004	14.63	0.16	magenta
	RIM8	0.377	0.003	14.07	1.315	magenta
	HOM6	0.372	0.006	17.44	0.815	magenta
	HSC82	0.381	0	13.81	1.254	magenta
	ETT1	0.392	0.005	15.06	1.013	magenta
	SCJ1	0.383	0.004	13.78	1.75	magenta
	ERV46	0.387	0.005	17.64	1.919	magenta
	SNF2	0.247	0.012	10.51	0.51	magenta
	FUN26	0.395	0.001	14.09	0.723	magenta
	YLR124W	0.388	0.007	16.69	3.699	magenta
	NDE1	0.348	0.011	12.57	2.707	magenta
	TDA9	0.299	0.003	8.1	2.865	magenta
	OSW5	0.388	0.001	16.3	1.715	magenta
	RSB1	0.387	0.017	12.61	0.573	magenta
	YND1	0.386	0.01	15.22	0.27	magenta
	HSL1	0.386	0.014	15.23	3.687	magenta
	UPF3	0.345	0.015	11.93	1.072	magenta
	ISU2	0.329	0.017	7.08	0.3	magenta
	YLR407W	0.383	0.008	13.14	1.296	magenta
	SMF2	0.392	0.005	13.04	0.558	magenta
	SPS100	0.398	0.006	14.89	1.986	magenta
	YGR069W	0.397	0.004	13.8	0.76	magenta
	GPP1	0.277	0.012	8.1	3.88	magenta
	OST5	0.393	0.003	15.83	1.803	magenta
	YPR197C	0.389	0.003	14.47	1.679	magenta
	SAP4	0.386	0.003	16.43	3.569	magenta
	MIG1	0.393	0.003	16.61	1.295	magenta
	AIM19	0.388	0.003	13.33	1.172	magenta
	UNG1	0.374	0.009	14.25	2.552	magenta
	RLM1	0.376	0.014	15	1.891	magenta
	PRK1	0.375	0.014	11.73	1.229	magenta
	PHO23	0.343	0.016	12.18	1.679	magenta
	WAR1	0.385	0.015	15	2.368	magenta
	RBS1	0.389	0.008	18.87	2.769	magenta
	STE24	0.394	0.006	21.12	3.395	magenta
	APA2	0.379	0.009	12.78	1.624	magenta
	ASM4	0.396	0.008	14.34	1.915	magenta
	LST7	0.275	0.009	0.63	0.886	orange
	RAD27	0.381	0.003	5.58	0.075	orange
	MRPL3	0.348	0.012	1.71	1.705	orange
	DBF2	0.391	0.007	6.49	2.065	orange
	COQ9	0.378	0.012	6.37	0.667	orange
	MTF2	0.376	0.01	2.57	1.441	orange
	DEF1	0.366	0.001	0.58	0.355	orange
	RPS30B	0.382	0.008	6.51	0.802	orange
	YJR084W	0.392	0.012	7	1.652	orange
	HAP3	0.337	0.009	1.87	0.664	orange
	LDB7	0.395	0.006	3.86	1.505	orange
	FAR11	0.377	0.004	5.2	1.662	orange
	NST1	0.395	0.003	6.87	1.616	orange
	SIR1	0.392	0.005	3.21	2.923	orange
	BFR1	0.395	0.01	4.71	2.269	orange
	RAD2	0.401	0.001	6.38	1.503	orange
	RPS14A	0.369	0.002	4.41	1.71	orange
	QRI7	0.352	0.004	2.75	1.804	orange
	HOG1	0.371	0.004	4.79	2.283	orange
	SWC3	0.388	0.008	6.08	0.556	orange
	HHF1	0.392	0.011	5.56	0.696	orange
	YMR193C-A	0.371	0.006	2.21	1.934	orange
	YLR366W	0.393	0.007	6.8	2.165	orange
	YAF9	0.385	0.003	6.21	1.415	orange
	MBF1	0.395	0.006	7.16	1.747	orange
	MUB1	0.397	0.002	4.15	1.198	orange
	UFO1	0.355	0.007	0.94	0.865	orange
	YNL067W-B	0.396	0.003	7.93	0.921	orange
	ENT4	0.364	0.006	3.37	1.625	orange
	YBR292C	0.378	0.008	4.36	3.181	orange
	DUF1	0.368	0.008	4.97	1.217	orange
	MIP1	0.382	0.014	4.43	1.844	orange
	TIF4631	0.381	0.005	6.48	1.463	orange
	RPL20A	0.301	0.005	0.69	0.45	orange
	YAR1	0.373	0.006	3.17	0.803	orange
	MSE1	0.36	0.009	3.95	0.906	orange
	MRP1	0.355	0.008	2.25	1.598	orange
	ARP8	0.355	0.014	2.45	0.981	orange
	MSK1	0.368	0.003	1.39	0.991	orange
	IRC19	0.376	0.005	2.9	0.818	orange
	RMD9	0.369	0.009	2.21	2.014	orange
	PIM1	0.356	0.004	1.55	0.62	orange
	ATP22	0.386	0.004	1.45	1.365	orange
	SEE1	0.391	0.008	7.26	1.821	orange
	EST3	0.387	0.008	4.48	0.767	orange
	VAC17	0.395	0.005	5.97	1.381	orange
	APT2	0.395	0.008	4.47	2.124	orange
	YDL094C	0.383	0.007	4.41	0.58	orange
	DEG1	0.326	0.008	0.35	0.165	orange
	ATG13	0.377	0.019	4.94	2.119	orange
	MRPS28	0.372	0.011	4.83	0.935	orange
	SLX5	0.381	0.005	6.43	1.109	orange
	MSS116	0.364	0.011	4.08	1.384	orange
	RSM25	0.384	0.009	4.22	1.74	orange
	MRPL8	0.365	0.009	1.34	1.22	orange
	MRH4	0.363	0.002	2.45	0.255	orange
	MST1	0.375	0.005	3.29	0.195	orange
	RRG8	0.368	0.011	4.15	2.172	orange
	RSM18	0.374	0.01	5.19	2.393	orange
	MRPL6	0.357	0.003	3.32	1.641	orange
	YTA12	0.339	0.009	1.33	0.641	orange
	RPL17B	0.382	0.011	6.15	0.612	orange
	GSH2	0.381	0.008	6.7	0.621	orange
	ATG20	0.388	0.004	5.97	1.115	orange
	YGL042C	0.393	0.002	4.43	0.99	orange
	RPS26B	0.389	0.005	2.73	2.725	orange
	RPH1	0.364	0.01	1.77	1.77	orange
	HFA1	0.375	0.02	3.35	1.631	orange
	OPI7	0.385	0.004	5.14	0.33	orange
	HKR1	0.389	0.007	7.48	0.853	orange
	PPH3	0.385	0.006	6.27	0.999	orange
	YKL053W	0.39	0.004	7.06	1.084	orange
	PDR8	0.393	0.009	7.6	1.106	orange
	HRD3	0.397	0.002	8.1	0.612	orange
	NOP13	0.391	0.001	6.5	0.345	orange
	TIR3	0.381	0.012	1.36	1.734	orange
	SYP1	0.395	0.002	6.72	0.18	orange
	BSC1	0.39	0.009	7	1.899	orange
	COA1	0.397	0.01	3.96	1.777	red
	HOF1	0.404	0	5.77	2.465	red
	RTS1	0.387	0.03	5.29	0.095	red
	TMA19	0.414	0.006	5.53	2.271	red
	ATG1	0.402	0.004	5.03	0.751	red
	FUN30	0.411	0.009	7.42	0.948	red
	AAT1	0.407	0.001	7.72	1.595	red
	ELF1	0.409	0.003	3.68	2.061	red
	YOR376W-A	0.411	0.01	7.39	1.687	red
	MAD3	0.399	0.006	5.54	1.106	red
	EUG1	0.415	0.007	5.68	1.038	red
	PDB1	0.393	0.011	3.13	2.313	red
	SHE1	0.402	0.004	5.41	1.071	red
	HXK2	0.398	0.005	5.11	0.845	red
	SNF3	0.408	0.006	5.11	2.539	red
	ITC1	0.407	0.005	2.67	2.511	red
	APJ1	0.403	0.006	3.29	1.631	red
	MSN5	0.417	0.007	8.25	1.679	red
	SAP155	0.398	0.006	8.13	0.955	red
	MTC3	0.398	0.006	5.68	0.434	red
	YLL020C	0.413	0.013	4.78	2.276	red
	YPR153W	0.406	0.004	5.81	2.512	red
	MLH1	0.407	0.008	4.87	3.548	red
	NIF3	0.415	0.012	4.59	1.076	red
	YDR509W	0.406	0.019	6.13	2.573	red
	YAR044W	0.4	0.007	5.37	2.734	red
	SNF1	0.408	0.005	6.51	2.073	red
	CBC2	0.41	0.014	6.99	1.6	red
	SRV2	0.4	0.004	5.92	2.373	red
	PIF1	0.416	0.003	5.27	0.55	red
	MRC1	0.401	0.003	1.88	0.7	red
	TIF2	0.418	0.017	6	1.254	red
	YBR063C	0.427	0.014	7.71	0.705	red
	UBP8	0.404	0.002	6.59	1.93	red
	VMS1	0.407	0.006	5.48	0.89	red
	SNF11	0.402	0.005	8.62	0.287	red
	STE5	0.393	0.018	7.64	0.986	red
	YKL023W	0.401	0.006	4.67	1.086	red
	CRC1	0.403	0.009	7.28	2.347	red
	STE11	0.413	0.002	7.98	1.518	red
	MNR2	0.398	0.005	8.57	0.764	red
	BMT5	0.403	0.005	8.88	0.494	red
	NPR1	0.406	0.001	7.07	1.765	red
	YKE4	0.411	0.003	6.82	1.049	red
	MMS2	0.401	0.006	8.3	0.547	red
	RGI2	0.409	0.009	7.55	0.39	red
	PAN2	0.403	0.006	8.8	0.444	red
	OCA1	0.409	0.011	4.76	2.846	red

## Sheet: Fig - 2A pie_chart
	Class	% of mutants
	Red	3.16
	Orange	5.13
	Blue	6.38
	Magenta	24.34
	Chocolate	0.26
	Darkgreen	0.66
	Brown	0.2
	Cyan	0.39
	Lightblue	42.43
	Grey	17.04

## Sheet: Fig-2B
WT (BY4741)			hog1Δ			mrc1Δ			coq1Δ			bnr1Δ			far7Δ			mmr1Δ			atp23Δ			asf1Δ			ric1Δ			mpd2Δ
Colony no.	Growth rate (h-1)		Colony no.	Growth rate (h-1)		Colony no.	Growth rate (h-1)		Colony no.	Growth rate (h-1)		Colony no.	Growth rate (h-1)		Colony no.	Growth rate (h-1)		Colony no.	Growth rate (h-1)		Colony no.	Growth rate (h-1)		Colony no.	Growth rate (h-1)		Colony no.	Growth rate (h-1)		Colony no.	Growth rate (h-1)
1	0.392		1	0.402		1	0.317		1	0.415		1	0.338		1	0.448		1	0.278		1	0.186		1	0.457		1	0.171		1	0.359
2	0.403		2	0.403		2	0.44		2	0.467		2	0.239		2	0.174		2	0.387		2	0.207		2	0.437		2	0.195		2	0.476
3	0.278		3	0.385		3	0.416		3	0.426		3	0.431		3	0.427		3	0.207		3	0.448		3	0.334		3	0.216		3	0.43
4	0.287		4	0.424		4	0.424		4	0.414		4	0.421		4	0.446		4	0.381		4	0.418		4	0.473		4	0.21		4	0.286
5	0.36		5	0.355		5	0.38		5	0.379		5	0.366		5	0.515		5	0.423		5	0.233		5	0.359		5	0.171		5	0.208
6	0.423		6	0.401		6	0.491		6	0.439		6	0.363		6	0.429		6	0.363		6	0.398		6	0.459		6	0.177		6	0.11
7	0.43		7	0.366		7	0.393		7	0.361		7	0.413		7	0.387		7	0.323		7	0.26		7	0.499		7	0.186		7	0.408
8	0.297		8	0.319		8	0.414		8	0.391		8	0.515		8	0.41		8	0.119		8	0.285		8	0.288		8	0.247		8	0.395
9	0.411		9	0.339		9	0.425		9	0.219		9	0.441		9	0.451		9	0.222		9	0.356		9	0.433		9	0.123		9	0.423
10	0.433		10	0.4		10	0.414		10	0.435		10	0.418		10	0.376		10	0.346		10	0.45		10	0.479		10	0.173		10	0.403
11	0.456		11	0.349		11	0.443		11	0.418		11	0.408		11	0.256		11	0.353		11	0.182		11	0.435		11	0.307		11	0.329
12	0.427		12	0.346		12	0.357		12	0.124		12	0.43		12	0.373		12	0.331		12	0.419		12	0.389		12	0.209		12	0.424
13	0.444		13	0.312		13	0.433		13	0.401		13	0.407		13	0.441		13	0.13		13	0.327		13	0.502		13	0.216		13	0.376
14	0.31		14	0.335		14	0.382		14	0.398		14	0.386		14	0.462		14	0.236		14	0.267		14	0.526		14	0.246		14	0.437
15	0.265		15	0.246		15	0.397		15	0.414		15	0.487		15	0.384		15	0.125		15	0.409		15	0.45		15	0.175		15	0.427
16	0.264		16	0.32		16	0.422		16	0.402		16	0.408		16	0.292		16	0.306		16	0.203		16	0.449		16	0.277		16	0.37
17	0.407		17	0.39		17	0.243		17	0.234		17	0.333		17	0.397		17	0.193		17	0.382		17	0.32		17	0.264		17	0.464
18	0.374		18	0.358		18	0.396		18	0.441		18	0.437		18	0.401		18	0.169		18	0.413		18	0.201		18	0.165		18	0.359
19	0.374		19	0.38		19	0.484		19	0.397		19	0.445		19	0.502		19	0.374		19	0.399		19	0.428		19	0.125		19	0.404
20	0.14		20	0.33		20	0.416		20	0.397		20	0.477		20	0.392		20	0.187		20	0.388		20	0.454		20	0.131		20	0.268
21	0.388		21	0.432		21	0.375		21	0.328		21	0.423		21	0.509		21	0.338		21	0.262		21	0.314		21	0.159		21	0.383
22	0.352		22	0.379		22	0.339		22	0.323		22	0.411		22	0.46		22	0.408		22	0.244		22	0.491		22	0.173		22	0.438
23	0.496		23	0.356		23	0.406		23	0.256		23	0.399		23	0.357		23	0.324		23	0.299		23	0.398		23	0.245		23	0.391
24	0.424		24	0.399		24	0.389		24	0.304		24	0.434		24	0.487		24	0.315		24	0.282		24	0.148		24	0.13		24	0.288
25	0.373		25	0.274		25	0.46		25	0.275		25	0.457		25	0.38		25	0.425		25	0.4		25	0.479		25	0.234		25	0.386
26	0.365		26	0.393		26	0.352		26	0.215		26	0.4		26	0.485		26	0.296		26	0.447		26	0.465		26	0.282		26	0.464
27	0.391		27	0.37		27	0.442		27	0.327		27	0.429		27	0.469		27	0.377		27	0.403		27	0.242		27	0.169		27	0.391
28	0.357		28	0.429		28	0.45		28	0.228		28	0.186		28	0.442		28	0.304		28	0.269		28	0.457		28	0.164		28	0.453
29	0.382		29	0.392		29	0.176		29	0.292		29	0.332		29	0.396		29	0.163		29	0.422		29	0.442		29	0.232		29	0.153
30	0.432		30	0.389		30	0.399		30	0.384		30	0.464		30	0.421		30	0.404		30	0.386		30	0.441		30	0.177		30	0.458
31	0.409		31	0.36		31	0.4		31	0.288		31	0.407		31	0.421		31	0.384		31	0.197		31	0.449		31	0.13		31	0.389
32	0.435		32	0.329		32	0.447		32	0.255		32	0.443		32	0.469		32	0.377		32	0.102		32	0.23		32	0.32		32	0.369
33	0.346		33	0.401		33	0.457		33	0.306		33	0.462		33	0.35		33	0.345		33	0.443		33	0.415		33	0.149		33	0.41
34	0.479		34	0.373		34	0.422		34	0.294		34	0.487		34	0.453		34	0.332		34	0.371		34	0.403		34	0.17		34	0.404
35	0.422		35	0.419		35	0.435		35	0.287		35	0.428		35	0.371		35	0.173		35	0.187		35	0.242		35	0.169		35	0.39
36	0.425		36	0.39		36	0.479		36	0.354		36	0.445		36	0.511		36	0.329		36	0.396		36	0.476		36	0.157		36	0.409
37	0.371		37	0.374		37	0.41		37	0.296		37	0.227		37	0.436		37	0.387		37	0.366		37	0.284		37	0.175		37	0.4
38	0.444		38	0.401		38	0.385		38	0.332		38	0.356		38	0.37		38	0.122		38	0.429		38	0.464		38	0.126		38	0.269
39	0.431		39	0.469		39	0.425		39	0.335		39	0.405		39	0.438		39	0.396		39	0.393		39	0.408		39	0.224		39	0.416
40	0.326		40	0.393		40	0.503		40	0.324		40	0.351		40	0.28		40	0.151		40	0.314		40	0.403		40	0.172		40	0.414
41	0.212		41	0.43		41	0.312		41	0.216		41	0.412		41	0.429		41	0.218		41	0.362		41	0.445		41	0.302		41	0.423
42	0.467		42	0.395		42	0.473		42	0.284		42	0.424		42	0.419		42	0.199		42	0.193		42	0.392		42	0.164		42	0.433
43	0.415		43	0.354		43	0.401		43	0.402		43	0.469		43	0.405		43	0.192		43	0.458		43	0.286		43	0.302		43	0.371
44	0.37		44	0.376		44	0.349		44	0.157		44	0.424		44	0.429		44	0.263		44	0.377		44	0.413		44	0.129		44	0.36
45	0.43		45	0.406		45	0.412		45	0.368		45	0.41		45	0.381		45	0.25		45	0.185		45	0.482		45	0.417		45	0.401
46	0.227		46	0.41		46	0.403		46	0.27		46	0.378		46	0.392		46	0.361		46	0.26		46	0.416		46	0.112		46	0.456
47	0.439		47	0.471		47	0.398		47	0.337		47	0.457		47	0.453		47	0.296		47	0.363		47	0.449		47	0.235		47	0.424
48	0.384		48	0.407		48	0.396		48	0.367		48	0.372		48	0.437		48	0.414		48	0.252		48	0.463		48	0.191		48	0.499
49	0.407		49	0.386		49	0.371		49	0.404		49	0.368		49	0.385		49	0.372		49	0.385		49	0.536		49	0.156		49	0.393
50	0.392		50	0.406		50	0.399		50	0.327		50	0.433		50	0.432		50	0.162		50	0.212		50	0.303		50	0.121		50	0.242
51	0.357		51	0.435		51	0.488		51	0.081		51	0.391		51	0.45		51	0.267		51	0.381		51	0.402		51	0.17		51	0.46
52	0.303		52	0.341		52	0.394		52	0.166		52	0.369		52	0.4		52	0.186		52	0.259		52	0.299		52	0.344		52	0.285
53	0.433		53	0.393		53	0.432		53	0.368		53	0.347		53	0.435		53	0.245		53	0.4		53	0.368		53	0.212		53	0.402
54	0.312		54	0.397		54	0.45		54	0.383		54	0.373		54	0.485		54	0.195		54	0.434		54	0.398		54	0.117		54	0.426
55	0.253		55	0.372		55	0.486		55	0.382		55	0.484		55	0.441		55	0.365		55	0.374		55	0.455		55	0.351		55	0.173
56	0.265		56	0.384		56	0.472		56	0.382		56	0.34		56	0.328		56	0.332		56	0.38		56	0.23		56	0.228		56	0.484
57	0.4		57	0.353		57	0.469		57	0.396		57	0.369		57	0.344		57	0.342		57	0.389		57	0.364		57	0.289		57	0.501
58	0.194		58	0.387		58	0.43		58	0.402		58	0.402		58	0.41		58	0.09		58	0.454		58	0.246		58	0.218		58	0.451
59	0.427		59	0.372		59	0.417		59	0.336		59	0.406		59	0.403		59	0.411		59	0.216		59	0.456		59	0.163		59	0.416
60	0.366		60	0.373		60	0.42		60	0.428		60	0.385		60	0.442		60	0.322		60	0.31		60	0.457		60	0.252		60	0.391
61	0.221		61	0.415		61	0.33		61	0.375		61	0.386		61	0.44		61	0.358		61	0.374		61	0.404		61	0.406		61	0.455
62	0.4		62	0.264		62	0.391		62	0.401		62	0.436		62	0.425		62	0.366		62	0.399		62	0.309		62	0.165		62	0.266
63	0.369		63	0.347		63	0.43		63	0.318		63	0.296		63	0.409		63	0.394		63	0.144		63	0.437		63	0.314		63	0.468
64	0.416		64	0.085		64	0.4		64	0.402		64	0.362		64	0.487		64	0.362		64	0.387		64	0.483		64	0.145		64	0.437
65	0.419		65	0.383		65	0.453		65	0.428		65	0.413		65	0.407		65	0.383		65	0.406		65	0.432		65	0.114		65	0.36
66	0.401		66	0.412		66	0.437		66	0.407		66	0.447		66	0.409		66	0.322		66	0.385		66	0.419		66	0.181		66	0.455
67	0.401		67	0.325		67	0.413		67	0.412		67	0.282		67	0.378		67	0.179		67	0.315		67	0.479		67	0.225		67	0.417
68	0.399		68	0.385		68	0.459		68	0.402		68	0.394		68	0.318		68	0.372		68	0.178		68	0.457		68	0.132		68	0.424
69	0.37		69	0.397		69	0.293		69	0.374		69	0.263		69	0.424		69	0.325		69	0.254		69	0.144		69	0.116		69	0.422
70	0.436		70	0.4		70	0.345		70	0.206		70	0.403		70	0.433		70	0.152		70	0.306		70	0.287		70	0.242		70	0.352
71	0.385		71	0.381		71	0.387		71	0.37		71	0.351		71	0.408		71	0.366		71	0.385		71	0.528		71	0.188		71	0.422
72	0.383		72	0.347		72	0.427		72	0.32		72	0.425		72	0.445		72	0.383		72	0.309		72	0.338		72	0.25		72	0.431
73	0.347		73	0.343		73	0.369		73	0.351		73	0.406		73	0.393		73	0.318		73	0.189		73	0.269		73	0.272		73	0.404
74	0.42		74	0.425		74	0.378		74	0.372		74	0.414		74	0.358		74	0.43		74	0.154		74	0.3		74	0.201		74	0.397
75	0.41		75	0.267		75	0.423		75	0.164		75	0.405		75	0.495		75	0.31		75	0.421		75	0.419		75	0.129		75	0.459
76	0.348		76	0.334		76	0.396		76	0.432		76	0.417		76	0.392		76	0.393		76	0.422		76	0.309		76	0.215		76	0.408
77	0.427		77	0.382		77	0.256		77	0.306		77	0.451		77	0.443		77	0.245		77	0.385		77	0.489		77	0.101		77	0.363
78	0.302		78	0.404		78	0.348		78	0.344		78	0.388		78	0.421		78	0.188		78	0.236		78	0.443		78	0.23		78	0.461
79	0.462		79	0.239		79	0.333		79	0.427		79	0.412		79	0.6		79	0.394		79	0.345		79	0.264		79	0.276		79	0.368
80	0.411		80	0.331		80	0.467		80	0.339		80	0.456		80	0.415		80	0.378		80	0.42		80	0.493		80	0.158		80	0.47
81	0.438		81	0.348		81	0.452		81	0.415		81	0.461		81	0.41		81	0.394		81	0.306		81	0.463		81	0.33		81	0.44
82	0.378		82	0.422		82	0.452		82	0.354		82	0.446		82	0.41		82	0.257		82	0.128		82	0.225		82	0.268		82	0.505
83	0.346		83	0.388		83	0.461		83	0.346		83	0.345		83	0.382		83	0.335		83	0.417		83	0.527		83	0.186		83	0.45
84	0.46		84	0.374		84	0.402		84	0.421		84	0.491		84	0.505		84	0.138		84	0.393		84	0.454		84	0.201		84	0.418
85	0.414		85	0.083		85	0.393		85	0.177		85	0.446		85	0.406		85	0.138		85	0.121		85	0.438		85	0.137		85	0.404
86	0.395		86	0.443		86	0.429		86	0.329		86	0.47		86	0.463		86	0.379		86	0.397		86	0.401		86	0.184		86	0.394
87	0.455		87	0.405		87	0.475		87	0.337		87	0.411		87	0.38		87	0.281		87	0.403		87	0.193		87	0.135		87	0.446
88	0.282		88	0.388		88	0.441		88	0.333		88	0.453		88	0.448		88	0.414		88	0.368		88	0.558		88	0.185		88	0.414
89	0.401		89	0.427		89	0.407		89	0.317		89	0.371		89	0.409		89	0.381		89	0.161		89	0.462		89	0.126		89	0.379
90	0.23		90	0.304		90	0.426		90	0.42		90	0.399		90	0.436		90	0.317		90	0.347		90	0.452		90	0.164		90	0.374
91	0.352		91	0.361		91	0.441		91	0.377		91	0.462		91	0.473		91	0.38		91	0.424		91	0.227		91	0.19		91	0.483
92	0.403		92	0.353		92	0.43		92	0.338		92	0.434		92	0.393		92	0.272		92	0.368		92	0.445		92	0.186		92	0.358
93	0.169		93	0.366		93	0.43		93	0.467		93	0.307		93	0.436		93	0.368		93	0.339		93	0.41		93	0.223		93	0.368
94	0.378		94	0.4		94	0.287		94	0.363		94	0.371		94	0.475		94	0.155		94	0.415		94	0.444		94	0.224		94	0.363
95	0.436		95	0.331		95	0.393		95	0.389		95	0.42		95	0.392		95	0.241		95	0.321		95	0.481		95	0.309		95	0.37
96	0.411		96	0.355		96	0.462		96	0.435		96	0.314		96	0.474		96	0.166		96	0.204		96	0.418		96	0.237		96	0.422
97	0.431		97	0.34		97	0.402		97	0.392		97	0.402		97	0.442		97	0.354		97	0.286		97	0.333		97	0.149		97	0.412
98	0.339		98	0.428		98	0.423		98	0.366		98	0.401		98	0.426		98	0.182		98	0.177		98	0.471		98	0.192		98	0.341
99	0.374		99	0.361		99	0.421		99	0.373		99	0.48		99	0.416		99	0.279		99	0.246		99	0.476		99	0.227		99	0.423
100	0.303		100	0.394		100	0.42		100	0.37		100	0.389		100	0.485		100	0.38		100	0.13		100	0.525		100	0.238		100	0.17
101	0.447		101	0.4		101	0.379		101	0.103		101	0.384		101	0.333		101	0.345		101	0.388		101	0.449		101	0.22		101	0.319
102	0.324		102	0.413		102	0.404		102	0.427		102	0.452		102	0.474		102	0.226		102	0.335		102	0.465		102	0.162		102	0.333
103	0.398		103	0.398		103	0.484		103	0.398		103	0.315		103	0.278		103	0.078		103	0.399		103	0.437		103	0.454		103	0.308
104	0.377		104	0.453		104	0.202		104	0.371		104	0.396		104	0.49		104	0.209		104	0.33		104	0.404		104	0.192		104	0.217
105	0.403		105	0.354		105	0.404		105	0.39		105	0.46		105	0.422		105	0.374		105	0.294		105	0.486		105	0.198		105	0.364
106	0.339		106	0.363		106	0.359		106	0.4		106	0.394		106	0.381		106	0.233		106	0.436		106	0.411		106	0.236		106	0.405
107	0.348		107	0.362		107	0.405		107	0.447		107	0.447		107	0.413		107	0.133		107	0.416		107	0.421		107	0.385		107	0.378
108	0.446		108	0.335		108	0.374		108	0.365		108	0.451		108	0.487		108	0.339		108	0.404		108	0.446		108	0.292		108	0.438
109	0.388		109	0.301		109	0.477		109	0.165		109	0.454		109	0.113		109	0.403		109	0.236		109	0.27		109	0.152		109	0.41
110	0.446		110	0.412		110	0.55		110	0.39		110	0.391		110	0.394		110	0.131		110	0.363		110	0.516		110	0.233		110	0.416
111	0.39		111	0.389		111	0.462		111	0.366		111	0.404		111	0.47		111	0.3		111	0.459		111	0.532		111	0.121		111	0.289
112	0.425		112	0.388		112	0.493		112	0.402		112	0.46		112	0.376		112	0.396		112	0.409		112	0.468		112	0.168		112	0.412
113	0.374		113	0.382		113	0.378		113	0.28		113	0.419		113	0.484		113	0.294		113	0.427		113	0.495		113	0.129		113	0.369
114	0.402		114	0.334		114	0.442		114	0.488		114	0.406		114	0.422		114	0.421		114	0.258		114	0.449		114	0.369		114	0.403
115	0.285		115	0.404		115	0.395		115	0.347		115	0.405		115	0.226		115	0.249		115	0.443		115	0.447		115	0.154		115	0.418
116	0.382		116	0.396		116	0.475		116	0.341		116	0.507		116	0.33		116	0.352		116	0.341		116	0.407		116	0.132		116	0.333
117	0.466		117	0.361		117	0.375		117	0.335		117	0.228		117	0.451		117	0.186		117	0.278		117	0.455		117	0.296		117	0.362
118	0.403		118	0.4		118	0.397		118	0.39		118	0.362		118	0.401		118	0.359		118	0.417		118	0.428		118	0.17		118	0.426
119	0.436		119	0.329		119	0.389		119	0.368		119	0.436		119	0.396		119	0.359		119	0.397		119	0.5		119	0.153		119	0.357
120	0.385		120	0.478		120	0.362		120	0.452		120	0.442		120	0.474		120	0.32		120	0.385		120	0.358		120	0.17		120	0.425
121	0.391		121	0.369		121	0.419		121	0.396		121	0.399		121	0.413		121	0.182		121	0.396		121	0.508		121	0.401		121	0.442
122	0.384		122	0.364		122	0.451		122	0.399		122	0.379		122	0.479		122	0.131		122	0.286		122	0.471		122	0.239		122	0.481
123	0.417		123	0.387		123	0.508		123	0.396		123	0.395		123	0.36		123	0.381		123	0.406		123	0.318		123	0.176		123	0.372
124	0.398		124	0.359		124	0.225		124	0.373		124	0.455		124	0.436		124	0.374		124	0.393		124	0.443		124	0.193		124	0.438
125	0.274		125	0.388		125	0.452		125	0.341		125	0.379		125	0.442		125	0.413		125	0.391		125	0.456		125	0.164		125	0.402
126	0.362		126	0.327		126	0.317		126	0.4		126	0.45		126	0.395		126	0.373		126	0.158		126	0.508		126	0.247		126	0.443
127	0.411		127	0.364		127	0.428		127	0.249		127	0.4		127	0.429		127	0.171		127	0.368		127	0.466		127	0.183		127	0.461
128	0.416		128	0.294		128	0.451		128	0.425		128	0.259		128	0.212		128	0.239		128	0.217		128	0.464		128	0.153		128	0.312
129	0.409		129	0.273		129	0.366		129	0.357		129	0.419		129	0.402		129	0.073		129	0.39		129	0.505		129	0.185		129	0.309
130	0.439		130	0.387		130	0.375		130	0.286		130	0.435		130	0.285		130	0.313		130	0.162		130	0.521		130	0.175		130	0.427
131	0.381		131	0.392		131	0.419		131	0.387		131	0.495		131	0.409		131	0.414		131	0.386		131	0.335		131	0.137		131	0.468
132	0.417		132	0.377		132	0.397		132	0.33		132	0.438		132	0.489		132	0.078		132	0.387		132	0.464		132	0.287		132	0.497
133	0.42		133	0.376		133	0.437		133	0.424		133	0.439		133	0.423		133	0.402		133	0.434		133	0.444		133	0.155		133	0.359
134	0.392		134	0.379		134	0.367		134	0.382		134	0.428		134	0.487		134	0.184		134	0.402		134	0.373		134	0.274		134	0.355
135	0.348		135	0.41		135	0.347		135	0.412		135	0.441		135	0.424		135	0.405		135	0.213		135	0.409		135	0.152		135	0.409
136	0.386		136	0.359		136	0.422		136	0.345		136	0.385		136	0.313		136	0.342		136	0.213		136	0.474		136	0.188		136	0.404
137	0.411		137	0.441		137	0.456		137	0.348		137	0.418		137	0.459		137	0.174		137	0.175		137	0.456		137	0.18		137	0.413
138	0.423		138	0.43		138	0.362		138	0.302		138	0.438		138	0.343		138	0.35		138	0.343		138	0.508		138	0.255		138	0.441
139	0.437		139	0.253		139	0.444		139	0.329		139	0.431		139	0.432		139	0.345		139	0.238		139	0.436		139	0.247		139	0.391
140	0.456		140	0.212		140	0.389		140	0.227		140	0.442		140	0.422		140	0.08		140	0.379		140	0.348		140	0.284		140	0.335
141	0.408		141	0.387		141	0.396		141	0.375		141	0.379		141	0.423		141	0.402		141	0.234		141	0.424		141	0.291		141	0.459
142	0.357		142	0.403		142	0.404		142	0.372		142	0.496		142	0.447		142	0.271		142	0.138		142	0.41		142	0.163		142	0.454
143	0.354		143	0.336		143	0.248		143	0.139		143	0.458		143	0.467		143	0.158		143	0.391		143	0.448		143	0.148		143	0.426
144	0.326		144	0.409		144	0.386		144	0.381		144	0.427		144	0.431		144	0.271		144	0.113		144	0.43		144	0.196		144	0.42
145	0.393		145	0.43		145	0.34		145	0.404		145	0.421		145	0.431		145	0.195		145	0.31		145	0.429		145	0.173		145	0.398
146	0.349		146	0.411		146	0.341		146	0.396		146	0.45		146	0.492		146	0.216		146	0.406		146	0.457		146	0.27		146	0.405
147	0.409		147	0.432		147	0.479		147	0.385		147	0.429		147	0.435		147	0.334		147	0.367		147	0.478		147	0.238		147	0.456
148	0.425		148	0.358		148	0.391		148	0.441		148	0.309		148	0.398		148	0.37		148	0.391		148	0.332		148	0.153		148	0.459
149	0.211		149	0.353		149	0.442		149	0.345		149	0.389		149	0.288		149	0.375		149	0.343		149	0.457		149	0.38		149	0.396
150	0.402		150	0.34		150	0.395		150	0.443		150	0.398		150	0.497		150	0.36		150	0.417		150	0.424		150	0.173		150	0.303
151	0.414		151	0.344		151	0.434		151	0.37		151	0.403		151	0.398		151	0.332		151	0.373		151	0.456		151	0.097		151	0.363
152	0.403		152	0.339		152	0.442		152	0.367		152	0.363		152	0.406		152	0.343		152	0.264		152	0.45		152	0.179		152	0.438
153	0.405		153	0.369		153	0.449		153	0.455		153	0.23		153	0.376		153	0.362		153	0.324		153	0.437		153	0.257		153	0.429
154	0.364		154	0.354		154	0.36		154	0.318		154	0.228		154	0.398		154	0.322		154	0.208		154	0.477		154	0.264		154	0.403
155	0.362		155	0.353		155	0.383		155	0.34		155	0.42		155	0.427		155	0.364		155	0.321		155	0.171		155	0.169		155	0.41
156	0.405		156	0.376		156	0.447		156	0.372		156	0.428		156	0.498		156	0.165		156	0.38		156	0.471		156	0.224		156	0.468
157	0.273		157	0.38		157	0.377		157	0.35		157	0.479		157	0.372		157	0.282		157	0.344		157	0.502		157	0.187		157	0.426
158	0.383		158	0.287		158	0.456		158	0.334		158	0.381		158	0.529		158	0.344		158	0.219		158	0.488		158	0.173		158	0.441
159	0.384		159	0.368		159	0.268		159	0.352		159	0.457		159	0.423		159	0.325		159	0.267		159	0.388		159	0.147		159	0.468
160	0.252		160	0.303		160	0.441		160	0.276		160	0.308		160	0.257		160	0.381		160	0.343		160	0.43		160	0.128		160	0.39
161	0.391		161	0.306		161	0.391		161	0.369		161	0.499		161	0.425		161	0.371		161	0.432		161	0.298		161	0.152		161	0.405
162	0.422		162	0.377		162	0.41		162	0.432		162	0.377		162	0.536		162	0.173		162	0.271		162	0.454		162	0.336		162	0.4
163	0.23		163	0.32		163	0.428		163	0.353		163	0.377		163	0.439		163	0.435		163	0.423		163	0.452		163	0.184		163	0.378
164	0.39		164	0.291		164	0.387		164	0.399		164	0.436		164	0.457		164	0.26		164	0.399		164	0.474		164	0.18		164	0.412
165	0.41		165	0.397		165	0.409		165	0.401		165	0.369		165	0.381		165	0.18		165	0.416		165	0.408		165	0.289		165	0.413
166	0.348		166	0.433		166	0.362		166	0.423		166	0.311		166	0.34		166	0.332		166	0.252		166	0.405		166	0.3		166	0.379
167	0.371		167	0.379		167	0.365		167	0.359		167	0.431		167	0.447		167	0.379		167	0.344		167	0.493		167	0.16		167	0.366
168	0.447		168	0.329		168	0.383		168	0.372		168	0.406		168	0.437		168	0.36		168	0.282		168	0.463		168	0.225		168	0.421
169	0.407		169	0.415		169	0.392		169	0.397		169	0.394		169	0.285		169	0.248		169	0.305		169	0.478		169	0.282		169	0.145
170	0.436		170	0.347		170	0.492		170	0.388		170	0.441		170	0.422		170	0.354		170	0.364		170	0.413		170	0.195		170	0.456
171	0.28		171	0.412		171	0.449		171	0.366		171	0.437		171	0.293		171	0.325		171	0.394		171	0.414		171	0.236		171	0.398
172	0.445		172	0.368		172	0.339		172	0.08		172	0.43		172	0.255		172	0.155		172	0.337		172	0.456		172	0.208		172	0.411
173	0.485		173	0.364		173	0.396		173	0.429		173	0.338		173	0.44		173	0.317		173	0.251		173	0.245		173	0.178		173	0.421
174	0.358		174	0.386		174	0.378		174	0.163		174	0.367		174	0.352		174	0.401		174	0.385		174	0.424		174	0.243		174	0.422
175	0.42		175	0.347		175	0.416		175	0.396		175	0.453		175	0.43		175	0.376		175	0.338		175	0.461		175	0.199		175	0.376
176	0.447		176	0.327		176	0.432		176	0.453		176	0.422		176	0.422		176	0.339		176	0.307		176	0.443		176	0.162		176	0.286
177	0.413		177	0.394		177	0.38		177	0.366		177	0.435		177	0.415		177	0.391		177	0.077		177	0.449		177	0.169		177	0.343
178	0.423		178	0.375		178	0.441		178	0.39		178	0.476		178	0.244		178	0.336		178	0.436		178	0.171		178	0.186		178	0.417
179	0.394		179	0.382		179	0.475		179	0.436		179	0.439		179	0.426		179	0.253		179	0.345		179	0.516		179	0.18		179	0.354
180	0.422		180	0.334		180	0.368		180	0.372		180	0.42		180	0.466		180	0.406		180	0.449		180	0.43		180	0.203		180	0.373
181	0.387		181	0.426		181	0.389		181	0.362		181	0.424		181	0.477		181	0.205		181	0.307		181	0.46		181	0.231		181	0.37
182	0.384		182	0.37		182	0.295		182	0.393		182	0.476		182	0.435		182	0.366		182	0.392		182	0.407		182	0.287		182	0.422
183	0.326		183	0.386		183	0.422		183	0.373		183	0.453		183	0.392		183	0.402		183	0.348		183	0.402		183	0.198		183	0.468
184	0.427		184	0.384		184	0.397		184	0.391		184	0.417		184	0.406		184	0.205		184	0.346		184	0.476		184	0.153		184	0.402
185	0.353		185	0.381		185	0.31		185	0.474		185	0.535		185	0.342		185	0.297		185	0.371		185	0.5		185	0.133		185	0.49
186	0.383		186	0.376		186	0.353		186	0.406		186	0.406		186	0.403		186	0.11		186	0.387		186	0.458		186	0.17		186	0.422
187	0.361		187	0.392		187	0.384		187	0.445		187	0.385		187	0.343		187	0.093		187	0.411		187	0.387		187	0.338		187	0.471
188	0.388		188	0.363		188	0.296		188	0.391		188	0.449		188	0.355		188	0.179		188	0.14		188	0.349		188	0.152		188	0.471
189	0.404		189	0.316		189	0.406		189	0.504		189	0.426		189	0.485		189	0.331		189	0.381		189	0.458		189	0.184		189	0.401
190	0.374		190	0.372		190	0.426		190	0.427		190	0.431		190	0.122		190	0.356		190	0.418		190	0.398		190	0.277		190	0.429
191	0.413		191	0.244		191	0.398		191	0.426		191	0.437		191	0.471		191	0.252		191	0.405		191	0.397		191	0.246		191	0.408
192	0.433		192	0.414		192	0.362		192	0.394		192	0.42		192	0.413		192	0.385		192	0.397		192	0.32		192	0.131		192	0.429
193	0.372		193	0.339		193	0.421		193	0.208		193	0.445		193	0.486		193	0.241		193	0.407		193	0.47		193	0.119		193	0.449
194	0.25		194	0.365		194	0.401		194	0.365		194	0.458		194	0.419		194	0.181		194	0.238		194	0.269		194	0.21		194	0.407
195	0.445		195	0.371		195	0.374		195	0.381		195	0.489		195	0.243		195	0.329		195	0.403		195	0.32		195	0.243		195	0.427
196	0.193		196	0.356		196	0.425		196	0.357		196	0.448		196	0.453		196	0.051		196	0.286		196	0.377		196	0.178		196	0.461
197	0.251		197	0.294		197	0.471		197	0.365		197	0.38		197	0.372		197	0.395		197	0.363		197	0.443		197	0.152		197	0.383
198	0.355		198	0.344		198	0.297		198	0.359		198	0.34		198	0.48		198	0.326		198	0.341		198	0.445		198	0.305		198	0.365
199	0.379		199	0.413		199	0.384		199	0.417		199	0.411		199	0.447		199	0.387		199	0.329		199	0.465		199	0.169		199	0.37
200	0.411		200	0.46		200	0.411		200	0.363		200	0.422		200	0.286		200	0.423		200	0.273		200	0.44		200	0.139		200	0.423
201	0.424		201	0.47		201	0.407		201	0.41		201	0.375		201	0.489		201	0.358		201	0.393		201	0.462		201	0.136		201	0.38
202	0.416		202	0.37		202	0.402		202	0.379		202	0.366		202	0.477		202	0.351		202	0.377		202	0.461		202	0.285		202	0.38
203	0.484		203	0.318		203	0.41		203	0.401		203	0.441		203	0.409		203	0.309		203	0.407		203	0.424		203	0.158		203	0.424
204	0.36		204	0.4		204	0.318		204	0.375		204	0.461		204	0.459		204	0.091		204	0.437		204	0.463		204	0.149		204	0.434
205	0.389		205	0.342		205	0.387		205	0.358		205	0.462		205	0.343		205	0.317		205	0.395		205	0.333		205	0.189		205	0.481
206	0.43		206	0.422		206	0.411		206	0.371		206	0.42		206	0.395		206	0.313		206	0.3		206	0.467		206	0.201		206	0.419
207	0.361		207	0.319		207	0.399		207	0.338		207	0.151		207	0.465		207	0.218		207	0.291		207	0.455		207	0.325		207	0.162
208	0.372		208	0.381		208	0.395		208	0.061		208	0.432		208	0.4		208	0.247		208	0.349		208	0.378		208	0.261		208	0.41
209	0.357		209	0.397		209	0.348		209	0.109		209	0.397		209	0.245		209	0.334		209	0.412		209	0.419		209	0.331		209	0.412
210	0.336		210	0.358		210	0.43		210	0.359		210	0.418		210	0.231		210	0.192		210	0.384		210	0.339		210	0.269		210	0.434
211	0.371		211	0.446		211	0.423		211	0.188		211	0.362		211	0.484		211	0.227		211	0.409		211	0.348		211	0.253		211	0.454
212	0.378		212	0.363		212	0.333		212	0.385		212	0.159		212	0.383		212	0.352		212	0.434		212	0.275		212	0.087		212	0.426
213	0.417		213	0.33		213	0.426		213	0.171		213	0.432		213	0.299		213	0.3		213	0.363		213	0.456		213	0.258		213	0.451
214	0.356		214	0.258		214	0.357		214	0.394		214	0.39		214	0.203		214	0.356		214	0.382		214	0.478		214	0.251		214	0.381
215	0.385		215	0.379		215	0.466		215	0.223		215	0.44		215	0.43		215	0.289		215	0.4		215	0.426		215	0.158		215	0.385
216	0.38		216	0.428		216	0.356		216	0.141		216	0.289		216	0.399		216	0.112		216	0.378		216	0.406		216	0.343		216	0.415
217	0.408		217	0.325		217	0.166		217	0.328		217	0.403		217	0.444		217	0.364		217	0.415		217	0.457		217	0.265		217	0.336
218	0.378		218	0.352		218	0.463		218	0.38		218	0.445		218	0.319		218	0.373		218	0.488		218	0.467		218	0.212		218	0.404
219	0.328		219	0.328		219	0.362		219	0.187		219	0.406		219	0.511		219	0.301		219	0.48		219	0.373		219	0.16		219	0.37
220	0.389		220	0.37		220	0.349		220	0.385		220	0.428		220	0.451		220	0.145		220	0.421		220	0.385		220	0.151		220	0.389
221	0.394		221	0.35		221	0.393		221	0.387		221	0.421		221	0.394		221	0.364		221	0.412		221	0.43		221	0.36		221	0.443
222	0.392		222	0.363		222	0.414		222	0.363		222	0.459		222	0.471		222	0.312		222	0.32		222	0.461		222	0.222		222	0.45
223	0.39		223	0.321		223	0.298		223	0.292		223	0.437		223	0.405		223	0.429		223	0.221		223	0.44		223	0.158		223	0.355
224	0.332		224	0.202		224	0.422		224	0.213		224	0.463		224	0.429		224	0.419		224	0.298		224	0.467		224	0.294		224	0.439
225	0.387		225	0.353		225	0.397		225	0.375		225	0.439		225	0.422		225	0.264		225	0.356		225	0.301		225	0.281		225	0.192
226	0.418		226	0.373		226	0.408		226	0.407		226	0.411		226	0.37		226	0.456		226	0.389		226	0.462		226	0.204		226	0.4
227	0.43		227	0.31		227	0.421		227	0.288		227	0.465		227	0.439		227	0.521		227	0.251		227	0.29		227	0.162		227	0.264
228	0.357		228	0.344		228	0.324		228	0.387		228	0.388		228	0.504		228	0.419		228	0.313		228	0.441		228	0.23		228	0.437
229	0.367		229	0.349		229	0.4		229	0.377		229	0.401		229	0.365		229	0.418		229	0.463		229	0.296		229	0.176		229	0.423
230	0.38		230	0.39		230	0.314		230	0.342		230	0.42		230	0.406		230	0.448		230	0.425		230	0.344		230	0.286		230	0.43
231	0.334		231	0.353		231	0.37		231	0.315		231	0.26		231	0.402		231	0.373		231	0.404		231	0.473		231	0.2		231	0.431
232	0.392		232	0.358		232	0.472		232	0.298		232	0.438		232	0.278		232	0.428		232	0.238		232	0.387		232	0.236		232	0.408
233	0.412		233	0.359		233	0.415		233	0.382		233	0.354		233	0.327		233	0.403		233	0.269		233	0.399		233	0.165		233	0.438
234	0.407		234	0.328		234	0.42		234	0.384		234	0.363		234	0.433		234	0.369		234	0.449		234	0.509		234	0.246		234	0.298
235	0.348		235	0.409		235	0.363		235	0.273		235	0.129		235	0.255		235	0.23		235	0.418		235	0.438		235	0.162		235	0.164
236	0.421		236	0.407		236	0.398		236	0.334		236	0.445		236	0.435		236	0.368		236	0.436		236	0.466		236	0.132		236	0.377
237	0.401		237	0.421		237	0.373		237	0.314		237	0.434		237	0.436		237	0.261		237	0.379		237	0.483		237	0.182		237	0.386
238	0.465		238	0.394		238	0.202		238	0.382		238	0.439		238	0.454		238	0.188		238	0.383		238	0.33		238	0.169		238	0.406
239	0.413		239	0.353		239	0.358		239	0.35		239	0.462		239	0.491		239	0.362		239	0.275		239	0.242		239	0.29		239	0.426
240	0.389		240	0.376		240	0.418		240	0.385		240	0.41		240	0.4		240	0.375		240	0.407		240	0.502		240	0.257		240	0.433
241	0.434		241	0.384		241	0.338		241	0.367		241	0.447		241	0.428		241	0.423		241	0.383		241	0.273		241	0.265		241	0.335
242	0.309		242	0.411		242	0.415		242	0.411		242	0.439		242	0.451		242	0.352		242	0.362		242	0.476		242	0.212		242	0.451
243	0.464		243	0.422		243	0.433		243	0.36		243	0.248		243	0.282		243	0.369		243	0.399		243	0.449		243	0.196		243	0.385
244	0.368		244	0.311		244	0.4		244	0.368		244	0.382		244	0.434		244	0.313		244	0.405		244	0.248		244	0.15		244	0.328
245	0.431		245	0.438		245	0.394		245	0.465		245	0.356		245	0.367		245	0.423		245	0.398		245	0.409		245	0.271		245	0.39
246	0.437		246	0.389		246	0.326		246	0.425		246	0.398		246	0.373		246	0.271		246	0.364		246	0.372		246	0.15		246	0.461
247	0.421		247	0.386		247	0.39		247	0.33		247	0.399		247	0.444		247	0.175		247	0.384		247	0.485		247	0.163		247	0.466
248	0.376		248	0.38		248	0.295		248	0.475		248	0.399		248	0.293		248	0.311		248	0.382		248	0.359		248	0.211		248	0.444
249	0.445		249	0.308		249	0.388		249	0.439		249	0.53		249	0.456		249	0.344		249	0.353		249	0.435		249	0.359		249	0.37
250	0.273		250	0.384		250	0.388		250	0.313		250	0.51		250	0.439		250	0.238		250	0.408		250	0.441		250	0.19		250	0.399
251	0.418		251	0.299		251	0.478		251	0.348		251	0.412		251	0.533		251	0.266		251	0.378		251	0.456		251	0.194		251	0.438
252	0.472		252	0.304		252	0.298		252	0.362		252	0.413		252	0.439		252	0.425		252	0.285		252	0.294		252	0.229		252	0.426
253	0.271		253	0.441		253	0.312		253	0.299		253	0.378		253	0.344		253	0.41		253	0.369		253	0.247		253	0.207		253	0.414
254	0.45		254	0.287		254	0.381		254	0.323		254	0.386		254	0.305		254	0.314		254	0.4		254	0.479		254	0.208		254	0.408
255	0.404		255	0.265		255	0.429		255	0.339		255	0.38		255	0.295		255	0.318		255	0.379		255	0.369		255	0.144		255	0.41
256	0.479		256	0.351		256	0.574		256	0.17		256	0.457		256	0.466		256	0.235		256	0.299		256	0.254		256	0.196		256	0.407
257	0.335		257	0.321		257	0.517		257	0.326		257	0.452		257	0.467		257	0.341		257	0.209		257	0.497		257	0.217		257	0.405
258	0.296		258	0.387		258	0.374		258	0.332		258	0.403		258	0.428		258	0.27		258	0.395		258	0.45		258	0.159		258	0.397
259	0.457		259	0.366		259	0.586		259	0.118		259	0.392		259	0.485		259	0.335		259	0.147		259	0.248		259	0.192		259	0.442
260	0.475		260	0.417		260	0.394		260	0.348		260	0.418		260	0.331		260	0.17		260	0.17		260	0.307		260	0.138		260	0.4
261	0.491		261	0.358		261	0.408		261	0.434		261	0.377		261	0.415		261	0.404		261	0.383		261	0.438		261	0.285		261	0.411
262	0.269		262	0.346		262	0.243		262	0.165		262	0.412		262	0.422		262	0.332		262	0.12		262	0.42		262	0.161		262	0.335
263	0.395		263	0.324		263	0.369		263	0.341		263	0.445		263	0.301		263	0.193		263	0.421		263	0.465		263	0.138		263	0.408
264	0.344		264	0.406		264	0.431		264	0.566		264	0.46		264	0.397		264	0.38		264	0.389		264	0.497		264	0.207		264	0.418
265	0.201		265	0.307		265	0.492		265	0.419		265	0.407		265	0.317		265	0.404		265	0.218		265	0.475		265	0.201		265	0.394
266	0.377		266	0.361		266	0.35		266	0.224		266	0.449		266	0.452		266	0.394		266	0.354		266	0.455		266	0.219		266	0.479
267	0.476		267	0.346		267	0.495		267	0.414		267	0.397		267	0.5		267	0.374		267	0.143		267	0.436		267	0.219		267	0.427
268	0.449		268	0.374		268	0.414		268	0.344		268	0.38		268	0.45		268	0.354		268	0.263		268	0.446		268	0.166		268	0.427
269	0.41		269	0.278		269	0.474		269	0.364		269	0.408		269	0.377		269	0.233		269	0.311		269	0.191		269	0.172		269	0.399
270	0.43		270	0.257		270	0.436		270	0.371		270	0.397		270	0.448		270	0.297		270	0.452		270	0.337		270	0.342		270	0.432
271	0.408		271	0.393		271	0.441		271	0.373		271	0.431		271	0.481		271	0.326		271	0.336		271	0.478		271	0.205		271	0.404
272	0.222		272	0.354		272	0.411		272	0.371		272	0.408		272	0.47		272	0.41		272	0.324		272	0.396		272	0.183		272	0.431
273	0.397		273	0.369		273	0.395		273	0.417		273	0.392		273	0.401		273	0.365		273	0.387		273	0.232		273	0.162		273	0.397
274	0.31		274	0.317		274	0.381		274	0.207		274	0.454		274	0.325		274	0.339		274	0.267		274	0.344		274	0.147		274	0.355
275	0.391		275	0.353		275	0.485		275	0.358		275	0.473		275	0.432		275	0.346		275	0.153		275	0.231		275	0.204		275	0.172
276	0.379		276	0.386		276	0.45		276	0.344		276	0.384		276	0.476		276	0.424		276	0.184		276	0.47		276	0.298		276	0.434
277	0.37		277	0.363		277	0.389		277	0.345		277	0.448		277	0.401		277	0.328		277	0.444		277	0.441		277	0.18		277	0.343
278	0.387		278	0.412		278	0.325		278	0.336		278	0.411		278	0.478		278	0.151		278	0.176		278	0.415		278	0.133		278	0.414
279	0.288		279	0.36		279	0.391		279	0.4		279	0.476		279	0.402		279	0.159		279	0.421		279	0.485		279	0.131		279	0.379
280	0.251		280	0.349		280	0.44		280	0.416		280	0.436		280	0.516		280	0.331		280	0.287		280	0.335		280	0.134		280	0.41
281	0.394		281	0.346		281	0.359		281	0.45		281	0.498		281	0.271		281	0.397		281	0.372		281	0.438		281	0.178		281	0.388
282	0.42		282	0.373		282	0.442		282	0.398		282	0.34		282	0.494		282	0.15		282	0.314		282	0.423		282	0.174		282	0.3
283	0.353		283	0.367		283	0.428		283	0.404		283	0.41		283	0.441		283	0.343		283	0.411		283	0.264		283	0.305		283	0.411
284	0.165		284	0.407		284	0.384		284	0.266		284	0.447		284	0.48		284	0.365		284	0.322		284	0.486		284	0.19		284	0.401
285	0.42		285	0.369		285	0.235		285	0.394		285	0.438		285	0.457		285	0.185		285	0.256		285	0.498		285	0.211		285	0.391
286	0.39		286	0.366		286	0.384		286	0.406		286	0.394		286	0.485		286	0.335		286	0.409		286	0.449		286	0.211		286	0.405
287	0.297		287	0.385		287	0.327		287	0.145		287	0.404		287	0.508		287	0.346		287	0.325		287	0.488		287	0.218		287	0.371
288	0.25		288	0.378		288	0.465		288	0.277		288	0.324		288	0.5		288	0.313		288	0.124		288	0.468		288	0.196		288	0.356
289	0.402		289	0.385		289	0.396		289	0.437		289	0.426		289	0.417		289	0.354		289	0.34		289	0.387		289	0.235		289	0.374
290	0.344		290	0.397		290	0.459		290	0.198		290	0.436		290	0.464		290	0.203		290	0.441		290	0.465		290	0.117		290	0.448
291	0.291		291	0.328		291	0.438		291	0.29		291	0.402		291	0.396		291	0.37		291	0.263		291	0.509		291	0.226		291	0.341
292	0.436		292	0.352		292	0.442		292	0.19		292	0.37		292	0.386		292	0.274		292	0.393		292	0.44		292	0.358		292	0.407
293	0.347		293	0.342		293	0.408		293	0.38		293	0.461		293	0.459		293	0.373		293	0.275		293	0.458		293	0.365		293	0.44
294	0.383		294	0.435		294	0.355		294	0.407		294	0.412		294	0.153		294	0.392		294	0.403		294	0.452		294	0.37		294	0.443
295	0.368		295	0.437		295	0.398		295	0.413		295	0.4		295	0.492		295	0.4		295	0.18		295	0.448		295	0.262		295	0.409
296	0.337		296	0.446		296	0.353		296	0.352		296	0.416		296	0.431		296	0.309		296	0.322		296	0.249		296	0.243		296	0.422
297	0.371		297	0.338		297	0.415		297	0.327		297	0.423		297	0.378		297	0.327		297	0.42		297	0.293		297	0.214		297	0.501
298	0.394		298	0.281		298	0.375		298	0.313		298	0.373		298	0.466		298	0.338		298	0.443		298	0.478		298	0.203		298	0.448
299	0.424		299	0.367		299	0.405		299	0.399		299	0.381		299	0.44		299	0.295		299	0.395		299	0.216		299	0.3		299	0.441
300	0.163		300	0.386		300	0.24		300	0.322		300	0.369		300	0.45		300	0.174		300	0.377		300	0.423		300	0.138		300	0.44
301	0.362		301	0.365		301	0.339		301	0.367		301	0.396		301	0.366		301	0.259		301	0.226		301	0.503		301	0.202		301	0.413
302	0.382		302	0.308		302	0.469		302	0.29		302	0.384		302	0.285		302	0.309		302	0.307		302	0.246		302	0.256		302	0.373
303	0.355		303	0.297		303	0.409		303	0.475		303	0.464		303	0.396		303	0.337		303	0.238		303	0.5		303	0.224		303	0.38
304	0.439		304	0.326		304	0.364		304	0.384		304	0.459		304	0.417		304	0.269		304	0.289		304	0.404		304	0.352		304	0.339
305	0.412		305	0.342		305	0.449		305	0.337		305	0.498		305	0.478		305	0.341		305	0.201		305	0.515		305	0.239		305	0.392
306	0.365		306	0.397		306	0.439		306	0.431		306	0.491		306	0.457		306	0.151		306	0.414		306	0.428		306	0.178		306	0.4
307	0.383		307	0.309		307	0.407		307	0.119		307	0.373		307	0.469		307	0.398		307	0.371		307	0.468		307	0.246		307	0.326
308	0.444		308	0.401		308	0.402		308	0.213		308	0.424		308	0.168		308	0.35		308	0.297		308	0.434		308	0.124		308	0.36
309	0.394		309	0.33		309	0.375		309	0.391		309	0.451		309	0.445		309	0.194		309	0.398		309	0.242		309	0.316		309	0.451
310	0.393		310	0.489		310	0.408		310	0.261		310	0.396		310	0.501		310	0.214		310	0.47		310	0.163		310	0.136		310	0.253
311	0.376		311	0.408		311	0.415		311	0.285		311	0.45		311	0.548		311	0.475		311	0.181		311	0.425		311	0.384		311	0.395
312	0.481		312	0.411		312	0.326		312	0.344		312	0.415		312	0.385		312	0.445		312	0.25		312	0.405		312	0.164		312	0.39
313	0.393		313	0.371		313	0.45		313	0.313		313	0.401		313	0.427		313	0.438		313	0.367		313	0.465		313	0.165		313	0.448
314	0.424		314	0.382		314	0.396		314	0.454		314	0.39		314	0.388		314	0.144		314	0.42		314	0.522		314	0.161		314	0.404
315	0.429		315	0.384		315	0.455		315	0.172		315	0.52		315	0.42		315	0.353		315	0.378		315	0.459		315	0.289		315	0.448
316	0.36		316	0.396		316	0.416		316	0.331		316	0.431		316	0.39		316	0.158		316	0.377		316	0.455		316	0.153		316	0.438
317	0.372		317	0.294		317	0.442		317	0.439		317	0.442		317	0.456		317	0.34		317	0.395		317	0.408		317	0.371		317	0.438
318	0.37		318	0.358		318	0.479		318	0.402		318	0.411		318	0.461		318	0.086		318	0.305		318	0.481		318	0.133		318	0.413
319	0.418		319	0.38		319	0.357		319	0.33		319	0.383		319	0.449		319	0.227		319	0.411		319	0.402		319	0.155		319	0.342
320	0.38		320	0.346		320	0.375		320	0.337		320	0.439		320	0.416		320	0.186		320	0.388		320	0.37		320	0.245		320	0.407
321	0.383		321	0.423		321	0.369		321	0.383		321	0.412		321	0.495		321	0.328		321	0.348		321	0.43		321	0.253		321	0.446
322	0.385		322	0.336		322	0.378		322	0.4		322	0.379		322	0.528		322	0.333		322	0.33		322	0.463		322	0.163		322	0.368
323	0.405		323	0.417		323	0.401		323	0.318		323	0.401		323	0.472		323	0.373		323	0.388		323	0.264		323	0.12		323	0.251
324	0.125		324	0.36		324	0.46		324	0.18		324	0.334		324	0.396		324	0.143		324	0.381		324	0.447		324	0.239		324	0.444
325	0.359		325	0.33		325	0.513		325	0.237		325	0.399		325	0.448		325	0.422		325	0.217		325	0.518		325	0.277		325	0.386
326	0.443		326	0.394		326	0.374		326	0.423		326	0.427		326	0.492		326	0.243		326	0.368		326	0.449		326	0.138		326	0.387
327	0.372		327	0.333		327	0.352		327	0.412		327	0.515		327	0.409		327	0.384		327	0.344		327	0.207		327	0.209		327	0.411
328	0.361		328	0.352		328	0.342		328	0.222		328	0.418		328	0.454		328	0.341		328	0.413		328	0.445		328	0.326		328	0.371
329	0.374		329	0.345		329	0.393		329	0.376		329	0.427		329	0.293		329	0.402		329	0.21		329	0.446		329	0.19		329	0.299
330	0.437		330	0.373		330	0.386		330	0.412		330	0.447		330	0.404		330	0.409		330	0.277		330	0.464		330	0.202		330	0.423
331	0.422		331	0.387		331	0.412		331	0.276		331	0.391		331	0.425		331	0.35		331	0.417		331	0.316		331	0.207		331	0.397
332	0.406		332	0.391		332	0.289		332	0.326		332	0.45		332	0.388		332	0.24		332	0.341		332	0.449		332	0.283		332	0.41
333	0.394		333	0.375		333	0.391		333	0.189		333	0.432		333	0.487		333	0.39		333	0.31		333	0.512		333	0.179		333	0.244
334	0.358		334	0.442		334	0.455		334	0.357		334	0.4		334	0.408		334	0.217		334	0.214		334	0.423		334	0.122		334	0.365
335	0.413		335	0.32		335	0.351		335	0.333		335	0.439		335	0.436		335	0.37		335	0.151		335	0.463		335	0.237		335	0.453
336	0.417		336	0.339		336	0.409		336	0.331		336	0.432		336	0.463		336	0.191		336	0.124		336	0.467		336	0.211		336	0.434
337	0.262		337	0.357		337	0.389		337	0.333		337	0.445		337	0.511		337	0.303		337	0.292		337	0.42		337	0.15		337	0.337
338	0.394		338	0.377		338	0.405		338	0.39		338	0.416		338	0.467		338	0.373		338	0.425		338	0.473		338	0.199		338	0.369
339	0.369		339	0.334		339	0.385		339	0.387		339	0.341		339	0.427		339	0.095		339	0.367		339	0.38		339	0.153		339	0.284
340	0.397		340	0.466		340	0.391		340	0.351		340	0.471		340	0.419		340	0.383		340	0.366		340	0.226		340	0.436		340	0.309
341	0.337		341	0.367		341	0.346		341	0.381		341	0.428		341	0.44		341	0.3		341	0.41		341	0.49		341	0.118		341	0.194
342	0.319		342	0.352		342	0.431		342	0.274		342	0.432		342	0.425		342	0.351		342	0.356		342	0.507		342	0.284		342	0.287
343	0.37		343	0.434		343	0.402		343	0.353		343	0.361		343	0.334		343	0.236		343	0.28		343	0.451		343	0.195		343	0.339
344	0.311		344	0.346		344	0.415		344	0.412		344	0.455		344	0.473		344	0.361		344	0.237		344	0.43		344	0.21		344	0.249
345	0.415		345	0.384		345	0.327		345	0.298		345	0.428		345	0.367		345	0.396		345	0.397		345	0.4		345	0.197		345	0.33
346	0.405		346	0.369		346	0.463		346	0.373		346	0.418		346	0.453		346	0.331		346	0.359		346	0.467		346	0.18		346	0.412
347	0.396		347	0.333		347	0.444		347	0.319		347	0.133		347	0.377		347	0.34		347	0.391		347	0.427		347	0.207		347	0.419
348	0.325		348	0.357		348	0.405		348	0.423		348	0.28		348	0.475		348	0.358		348	0.267		348	0.405		348	0.172		348	0.438
349	0.383		349	0.383		349	0.447		349	0.377		349	0.413		349	0.455		349	0.454		349	0.333		349	0.448		349	0.157		349	0.369
350	0.392		350	0.365		350	0.398		350	0.356		350	0.43		350	0.399		350	0.319		350	0.298		350	0.351		350	0.269		350	0.246
351	0.419		351	0.37		351	0.394		351	0.359		351	0.46		351	0.266		351	0.369		351	0.225		351	0.518		351	0.228		351	0.461
352	0.409		352	0.309		352	0.391		352	0.354		352	0.441		352	0.381		352	0.38		352	0.228		352	0.402		352	0.092		352	0.516
353	0.133		353	0.364		353	0.385		353	0.202		353	0.424		353	0.455		353	0.405		353	0.382		353	0.307		353	0.168		353	0.411
354	0.354		354	0.376		354	0.378		354	0.402		354	0.493		354	0.305		354	0.304		354	0.349		354	0.454		354	0.193		354	0.32
355	0.285		355	0.371		355	0.364		355	0.448		355	0.499		355	0.451		355	0.32		355	0.187		355	0.447		355	0.21		355	0.45
356	0.332		356	0.38		356	0.374		356	0.377		356	0.42		356	0.454		356	0.424		356	0.37		356	0.398		356	0.164		356	0.426
357	0.413		357	0.34		357	0.37		357	0.363		357	0.339		357	0.466		357	0.103		357	0.377		357	0.415		357	0.262		357	0.386
358	0.422		358	0.327		358	0.384		358	0.431		358	0.41		358	0.441		358	0.378		358	0.336		358	0.393		358	0.218		358	0.424
359	0.321		359	0.433		359	0.367		359	0.335		359	0.446		359	0.417		359	0.419		359	0.41		359	0.426					359	0.392
360	0.44		360	0.331		360	0.421		360	0.41		360	0.4		360	0.489		360	0.38		360	0.248		360	0.485					360	0.371
361	0.402		361	0.388		361	0.251		361	0.355		361	0.424		361	0.455		361	0.243		361	0.336		361	0.541					361	0.408
362	0.383		362	0.359		362	0.29		362	0.281		362	0.47		362	0.452		362	0.403		362	0.421		362	0.48					362	0.277
363	0.377		363	0.418		363	0.224		363	0.258		363	0.427		363	0.412		363	0.06		363	0.4		363	0.451					363	0.439
364	0.455		364	0.411		364	0.371		364	0.259		364	0.393		364	0.411		364	0.34		364	0.446		364	0.432					364	0.306
365	0.309		365	0.373		365	0.399		365	0.232		365	0.345		365	0.47		365	0.193		365	0.374		365	0.464					365	0.483
366	0.349		366	0.467		366	0.374		366	0.418		366	0.404		366	0.391		366	0.323		366	0.271		366	0.459					366	0.421
367	0.366		367	0.399		367	0.383		367	0.378		367	0.339		367	0.397		367	0.323		367	0.342		367	0.491					367	0.148
368	0.399		368	0.347		368	0.422		368	0.402		368	0.349		368	0.465		368	0.195		368	0.389		368	0.519					368	0.291
369	0.379		369	0.37		369	0.342		369	0.302		369	0.444		369	0.367		369	0.123		369	0.417		369	0.489					369	0.407
370	0.368		370	0.389		370	0.363		370	0.41		370	0.475		370	0.362		370	0.338		370	0.092		370	0.236					370	0.385
371	0.305		371	0.408		371	0.388		371	0.416		371	0.483		371	0.437		371	0.374		371	0.275		371	0.434					371	0.345
372	0.245		372	0.393		372	0.415		372	0.402		372	0.451		372	0.502		372	0.121		372	0.092		372	0.422					372	0.455
373	0.439		373	0.46		373	0.431		373	0.429		373	0.417		373	0.4		373	0.236		373	0.379		373	0.454					373	0.379
374	0.325		374	0.388		374	0.195		374	0.178		374	0.541		374	0.408		374	0.366		374	0.379		374	0.386					374	0.483
375	0.422		375	0.346		375	0.362		375	0.372		375	0.43		375	0.463		375	0.189		375	0.348		375	0.385					375	0.466
376	0.384		376	0.413		376	0.397		376	0.353		376	0.397		376	0.439		376	0.291		376	0.178		376	0.384					376	0.361
377	0.293		377	0.42		377	0.349		377	0.329		377	0.312		377	0.43		377	0.2		377	0.385		377	0.382					377	0.263
378	0.416		378	0.329		378	0.345		378	0.395		378	0.387		378	0.399		378	0.197		378	0.266		378	0.467					378	0.413
379	0.476		379	0.413		379	0.435		379	0.294		379	0.374		379	0.449		379	0.359		379	0.269		379	0.414					379	0.476
380	0.349		380	0.377		380	0.398		380	0.355		380	0.383		380	0.342		380	0.306		380	0.392		380	0.559					380	0.391
381	0.421		381	0.365		381	0.378		381	0.438		381	0.493		381	0.446		381	0.346		381	0.383		381	0.483					381	0.353
382	0.353		382	0.324		382	0.364		382	0.351		382	0.427		382	0.501		382	0.388		382	0.377		382	0.377					382	0.448
383	0.376		383	0.378		383	0.434		383	0.362		383	0.333		383	0.404		383	0.372		383	0.384		383	0.434					383	0.372
384	0.397		384	0.414		384	0.372		384	0.353		384	0.454		384	0.423		384	0.162		384	0.465		384	0.46					384	0.335
385	0.404		385	0.417		385	0.346		385	0.295		385	0.474		385	0.453		385	0.19		385	0.351		385	0.483					385	0.475
386	0.401		386	0.399		386	0.383		386	0.397		386	0.428		386	0.525		386	0.159		386	0.407		386	0.444					386	0.461
387	0.206		387	0.339		387	0.48		387	0.406		387	0.295		387	0.356		387	0.398		387	0.439		387	0.381					387	0.459
388	0.318		388	0.374		388	0.457		388	0.213		388	0.426		388	0.434		388	0.353		388	0.414		388	0.417					388	0.37
389	0.318		389	0.378		389	0.377		389	0.385		389	0.345		389	0.502		389	0.308		389	0.36		389	0.429					389	0.212
390	0.418		390	0.375		390	0.367		390	0.372		390	0.406		390	0.478		390	0.247		390	0.37		390	0.421					390	0.215
391	0.385		391	0.402		391	0.45		391	0.329		391	0.381		391	0.405		391	0.414		391	0.4		391	0.456					391	0.475
392	0.379		392	0.386		392	0.377		392	0.331		392	0.366		392	0.408		392	0.354		392	0.34		392	0.451					392	0.391
393	0.405		393	0.353		393	0.067		393	0.376		393	0.41		393	0.457		393	0.404		393	0.339		393	0.198					393	0.409
394	0.486		394	0.398		394	0.358		394	0.304		394	0.39		394	0.564		394	0.24		394	0.381		394	0.423					394	0.424
395	0.354		395	0.328		395	0.414		395	0.331		395	0.391		395	0.476		395	0.223		395	0.371		395	0.399					395	0.323
396	0.387		396	0.419		396	0.397		396	0.334		396	0.55		396	0.454		396	0.23		396	0.413		396	0.492					396	0.431
397	0.444		397	0.395		397	0.409		397	0.415		397	0.378		397	0.206		397	0.353		397	0.383		397	0.454					397	0.368
398	0.376		398	0.418		398	0.409		398	0.448		398	0.409		398	0.426		398	0.164		398	0.398		398	0.294					398	0.407
399	0.432		399	0.426		399	0.366		399	0.423		399	0.388		399	0.425		399	0.236		399	0.369		399	0.505					399	0.432
400	0.428		400	0.352		400	0.463		400	0.36		400	0.409		400	0.26		400	0.245		400	0.285		400	0.491					400	0.258
401	0.459		401	0.489		401	0.32		401	0.342		401	0.41		401	0.227		401	0.285		401	0.29		401	0.394					401	0.39
402	0.391		402	0.386		402	0.335		402	0.427		402	0.365		402	0.465		402	0.178		402	0.389		402	0.481					402	0.405
403	0.376		403	0.46		403	0.331		403	0.413		403	0.354		403	0.414		403	0.385		403	0.189		403	0.434					403	0.396
404	0.426		404	0.413		404	0.345		404	0.308		404	0.356		404	0.406		404	0.374		404	0.289		404	0.438					404	0.421
405	0.388		405	0.398		405	0.424		405	0.365		405	0.413		405	0.438		405	0.433		405	0.412		405	0.416					405	0.446
406	0.344		406	0.387		406	0.383		406	0.269		406	0.388		406	0.418		406	0.244		406	0.346		406	0.504					406	0.385
407	0.375		407	0.394		407	0.348		407	0.153		407	0.384		407	0.446		407	0.342		407	0.324		407	0.45					407	0.365
408	0.232		408	0.347		408	0.39		408	0.382		408	0.36		408	0.434		408	0.394		408	0.203		408	0.342					408	0.429
409	0.429		409	0.408		409	0.436		409	0.318		409	0.448		409	0.425		409	0.355		409	0.377		409	0.406					409	0.424
410	0.375		410	0.363		410	0.435		410	0.38		410	0.412		410	0.383		410	0.247		410	0.408		410	0.521					410	0.394
411	0.417		411	0.329		411	0.352		411	0.395		411	0.455		411	0.381		411	0.414		411	0.356		411	0.234					411	0.445
412	0.326		412	0.463		412	0.398		412	0.38		412	0.414		412	0.444		412	0.341		412	0.413		412	0.418					412	0.446
413	0.348		413	0.435		413	0.464		413	0.402		413	0.428		413	0.424		413	0.447		413	0.271		413	0.395					413	0.417
414	0.414		414	0.387		414	0.416		414	0.363		414	0.461		414	0.415		414	0.376		414	0.118		414	0.499					414	0.369
415	0.413		415	0.384		415	0.403		415	0.404		415	0.367		415	0.417		415	0.366		415	0.377		415	0.45					415	0.342
416	0.423		416	0.414		416	0.387		416	0.504		416	0.457		416	0.321		416	0.342		416	0.335		416	0.446					416	0.341
417	0.414		417	0.388		417	0.376		417	0.474		417	0.317		417	0.408		417	0.369		417	0.183		417	0.351					417	0.487
418	0.417		418	0.34		418	0.404		418	0.404		418	0.441		418	0.419		418	0.418		418	0.222		418	0.351					418	0.463
419	0.39		419	0.369		419	0.389		419	0.323		419	0.341		419	0.4		419	0.425		419	0.304		419	0.366					419	0.437
420	0.359		420	0.357		420	0.323		420	0.427		420	0.485		420	0.427		420	0.274		420	0.427		420	0.432					420	0.426
421	0.399		421	0.379		421	0.452		421	0.173		421	0.44		421	0.403		421	0.31		421	0.352		421	0.379					421	0.391
422	0.384		422	0.379		422	0.346		422	0.443		422	0.293		422	0.198		422	0.264		422	0.094		422	0.4					422	0.298
423	0.357		423	0.355		423	0.366		423	0.452		423	0.41		423	0.42		423	0.399		423	0.401		423	0.279					423	0.405
424	0.361		424	0.323		424	0.449		424	0.224		424	0.397		424	0.379		424	0.443		424	0.381		424	0.405					424	0.213
425	0.323		425	0.37		425	0.427		425	0.451		425	0.39		425	0.466		425	0.325		425	0.182		425	0.359					425	0.425
426	0.396		426	0.367		426	0.402		426	0.345		426	0.408		426	0.486		426	0.365		426	0.408		426	0.481					426	0.323
427	0.334		427	0.354		427	0.418		427	0.359		427	0.386		427	0.487		427	0.337		427	0.39		427	0.364					427	0.432
428	0.378		428	0.344					428	0.44		428	0.467		428	0.392		428	0.345		428	0.398		428	0.382					428	0.447
429	0.396		429	0.408					429	0.467		429	0.379		429	0.404		429	0.352		429	0.455		429	0.451					429	0.413
430	0.356		430	0.374					430	0.391		430	0.4		430	0.451		430	0.359		430	0.259		430	0.459					430	0.344
431	0.216		431	0.462					431	0.363		431	0.452		431	0.499		431	0.346		431	0.369		431	0.424					431	0.223
432	0.408		432	0.328					432	0.414		432	0.412		432	0.433		432	0.397		432	0.36		432	0.424					432	0.417
433	0.45		433	0.334					433	0.39		433	0.392		433	0.429		433	0.39		433	0.23		433	0.436					433	0.306
434	0.381		434	0.32					434	0.152		434	0.41		434	0.421		434	0.294		434	0.467		434	0.416					434	0.424
435	0.467		435	0.349					435	0.466		435	0.381		435	0.406		435	0.445		435	0.351		435	0.431					435	0.306
436	0.361		436	0.366					436	0.328		436	0.276		436	0.252		436	0.465		436	0.44		436	0.458					436	0.414
437	0.296		437	0.377					437	0.379		437	0.315		437	0.285		437	0.352		437	0.306		437	0.301					437	0.412
438	0.361		438	0.403					438	0.395		438	0.465		438	0.362		438	0.126		438	0.482		438	0.391					438	0.43
439	0.384		439	0.447					439	0.404		439	0.472		439	0.436		439	0.365		439	0.428		439	0.238					439	0.202
440	0.418		440	0.313					440	0.338		440	0.446		440	0.438		440	0.384		440	0.455		440	0.41					440	0.483
441	0.427		441	0.378					441	0.388		441	0.389		441	0.412		441	0.372		441	0.362		441	0.481					441	0.432
442	0.39		442	0.361					442	0.388		442	0.464		442	0.448		442	0.38		442	0.27		442	0.46					442	0.45
443	0.191		443	0.317					443	0.409		443	0.403		443	0.154		443	0.308		443	0.436		443	0.455					443	0.442
444	0.378		444	0.361					444	0.394		444	0.383		444	0.433		444	0.395		444	0.38		444	0.442					444	0.328
445	0.385		445	0.382					445	0.129		445	0.139		445	0.464		445	0.371		445	0.448		445	0.299					445	0.378
446	0.357		446	0.35					446	0.356		446	0.41		446	0.44		446	0.123		446	0.443		446	0.386					446	0.468
447	0.386		447	0.397					447	0.378		447	0.432		447	0.407		447	0.373		447	0.327		447	0.407					447	0.415
448	0.408		448	0.371					448	0.383		448	0.446		448	0.47		448	0.425		448	0.352		448	0.364					448	0.344
449	0.298		449	0.252					449	0.373		449	0.374		449	0.42		449	0.283		449	0.408		449	0.435					449	0.385
450	0.284		450	0.312					450	0.324		450	0.367		450	0.385		450	0.261		450	0.434		450	0.442					450	0.428
451	0.372		451	0.449					451	0.379		451	0.429		451	0.482		451	0.391		451	0.431		451	0.42					451	0.43
452	0.433		452	0.309					452	0.398		452	0.433		452	0.451		452	0.17		452	0.416		452	0.439					452	0.406
453	0.446		453	0.287					453	0.4		453	0.414		453	0.445		453	0.341		453	0.421		453	0.409					453	0.391
454	0.392		454	0.347					454	0.352		454	0.393		454	0.431		454	0.092		454	0.416		454	0.476					454	0.367
455	0.395		455	0.399					455	0.387		455	0.425		455	0.449		455	0.221		455	0.258		455	0.053					455	0.479
456	0.407		456	0.313					456	0.415		456	0.42		456	0.351		456	0.325		456	0.37		456	0.492					456	0.435
457	0.373		457	0.381					457	0.339		457	0.397		457	0.446		457	0.299		457	0.451		457	0.396					457	0.399
458	0.397		458	0.382					458	0.33		458	0.42		458	0.416		458	0.396		458	0.304		458	0.426					458	0.411
459	0.424		459	0.371					459	0.366		459	0.532		459	0.457		459	0.158		459	0.389		459	0.443					459	0.429
460	0.422		460	0.344					460	0.371		460	0.352		460	0.335		460	0.384		460	0.432		460	0.48					460	0.385
461	0.369		461	0.373					461	0.408		461	0.441		461	0.514		461	0.431		461	0.362		461	0.451					461	0.323
462	0.102		462	0.385					462	0.367		462	0.481		462	0.5		462	0.296		462	0.329		462	0.493					462	0.432
463	0.47		463	0.376					463	0.273		463	0.382		463	0.451		463	0.377		463	0.405		463	0.235					463	0.409
464	0.465		464	0.369					464	0.266		464	0.471		464	0.388		464	0.441		464	0.165		464	0.426					464	0.423
465	0.417		465	0.423					465	0.43		465	0.44		465	0.352		465	0.239		465	0.291		465	0.389					465	0.423
466	0.38		466	0.373					466	0.364		466	0.448		466	0.376		466	0.112		466	0.396		466	0.412					466	0.249
467	0.444		467	0.278					467	0.336		467	0.458		467	0.375		467	0.373		467	0.256		467	0.418					467	0.379
468	0.41		468	0.374					468	0.444		468	0.434		468	0.553		468	0.307		468	0.24		468	0.357					468	0.466
469	0.212		469	0.365					469	0.382		469	0.457		469	0.551		469	0.321		469	0.239		469	0.46					469	0.408
470	0.378		470	0.405					470	0.452		470	0.402		470	0.523		470	0.296		470	0.383		470	0.335					470	0.328
471	0.351		471	0.264					471	0.315		471	0.426		471	0.329		471	0.366		471	0.35		471	0.429					471	0.397
472	0.34		472	0.379					472	0.37		472	0.431		472	0.395		472	0.094		472	0.39		472	0.323					472	0.368
473	0.363		473	0.461					473	0.395		473	0.382		473	0.387		473	0.309		473	0.403		473	0.44					473	0.428
474	0.378		474	0.332					474	0.219		474	0.404		474	0.463		474	0.393		474	0.412		474	0.353					474	0.397
475	0.364		475	0.436					475	0.43		475	0.449		475	0.456		475	0.206		475	0.231		475	0.488					475	0.416
476	0.398		476	0.347					476	0.435		476	0.468		476	0.43		476	0.368		476	0.242		476	0.473					476	0.34
477	0.394		477	0.434					477	0.468		477	0.453		477	0.454		477	0.267		477	0.234		477	0.463					477	0.455
478	0.315		478	0.351					478	0.38		478	0.354		478	0.502		478	0.399		478	0.27		478	0.28					478	0.427
479	0.353		479	0.424					479	0.385		479	0.396		479	0.566		479	0.186		479	0.373		479	0.512					479	0.476
480	0.411		480	0.4					480	0.363		480	0.458		480	0.433		480	0.381		480	0.401		480	0.494					480	0.267
481	0.314		481	0.293					481	0.351		481	0.404		481	0.568		481	0.138		481	0.209		481	0.438					481	0.28
482	0.374		482	0.427					482	0.404		482	0.461		482	0.478		482	0.249		482	0.305		482	0.355					482	0.354
483	0.302		483	0.408					483	0.38		483	0.431		483	0.499		483	0.226		483	0.268		483	0.284					483	0.434
484	0.412		484	0.394					484	0.353		484	0.433		484	0.413		484	0.423		484	0.2		484	0.407					484	0.439
485	0.4		485	0.364					485	0.362		485	0.262		485	0.475		485	0.258		485	0.161		485	0.464					485	0.492
486	0.177		486	0.408					486	0.378		486	0.438		486	0.387		486	0.42		486	0.367		486	0.478					486	0.314
487	0.443		487	0.47					487	0.376		487	0.402		487	0.429		487	0.151		487	0.218		487	0.469					487	0.43
488	0.375		488	0.391					488	0.433		488	0.355		488	0.435		488	0.402		488	0.382		488	0.453					488	0.403
489	0.469		489	0.288					489	0.315		489	0.464		489	0.454		489	0.398		489	0.234		489	0.417					489	0.369
490	0.419		490	0.383					490	0.381		490	0.387		490	0.475		490	0.303		490	0.288		490	0.431					490	0.308
491	0.446		491	0.378					491	0.367		491	0.355		491	0.243		491	0.402		491	0.204		491	0.468					491	0.401
492	0.398		492	0.468					492	0.476		492	0.319		492	0.478		492	0.383		492	0.421		492	0.426					492	0.354
493	0.385		493	0.344					493	0.38		493	0.434		493	0.454		493	0.361		493	0.313		493	0.244					493	0.155
494	0.361		494	0.383					494	0.285		494	0.396		494	0.357		494	0.251		494	0.249		494	0.455					494	0.368
495	0.413		495	0.459					495	0.28		495	0.176		495	0.399		495	0.41		495	0.372		495	0.445					495	0.408
496	0.436		496	0.38					496	0.301		496	0.468		496	0.409		496	0.412		496	0.379		496	0.429					496	0.417
497	0.331		497	0.419					497	0.283		497	0.464		497	0.55		497	0.254		497	0.358		497	0.443					497	0.38
498	0.385		498	0.283					498	0.31		498	0.418		498	0.477		498	0.163		498	0.353		498	0.433					498	0.367
499	0.425		499	0.356					499	0.314		499	0.296		499	0.484		499	0.4		499	0.362		499	0.421					499	0.478
500	0.41		500	0.376					500	0.117		500	0.414		500	0.323		500	0.394		500	0.326		500	0.426					500	0.397
501	0.433		501	0.402					501	0.362		501	0.423		501	0.404		501	0.332		501	0.371		501	0.373					501	0.321
502	0.357		502	0.379					502	0.07		502	0.384		502	0.446		502	0.331		502	0.374		502	0.448					502	0.383
503	0.41		503	0.401					503	0.35		503	0.427		503	0.454		503	0.449		503	0.346		503	0.484					503	0.417
504	0.363		504	0.305					504	0.398		504	0.502		504	0.452		504	0.2		504	0.354		504	0.448					504	0.45
505	0.341		505	0.347					505	0.418		505	0.428		505	0.365		505	0.242		505	0.214		505	0.444					505	0.374
506	0.418		506	0.332					506	0.385		506	0.441		506	0.417		506	0.341		506	0.405		506	0.307					506	0.41
507	0.405		507	0.365					507	0.37		507	0.417		507	0.401		507	0.137		507	0.352		507	0.448					507	0.44
508	0.388		508	0.394					508	0.33		508	0.428		508	0.46		508	0.137		508	0.408		508	0.436					508	0.196
509	0.41		509	0.333					509	0.378		509	0.387		509	0.526		509	0.084		509	0.285		509	0.476					509	0.323
510	0.364		510	0.279					510	0.368		510	0.397		510	0.501		510	0.245		510	0.365		510	0.3					510	0.419
511	0.387		511	0.387					511	0.2		511	0.402		511	0.46		511	0.342		511	0.415		511	0.406					511	0.399
512	0.377		512	0.546					512	0.444		512	0.432		512	0.421		512	0.369		512	0.187		512	0.378					512	0.324
513	0.379		513	0.35					513	0.167		513	0.363		513	0.262		513	0.36		513	0.35		513	0.441					513	0.455
514	0.415		514	0.33					514	0.212		514	0.326		514	0.296		514	0.379		514	0.426		514	0.337					514	0.435
515	0.371		515	0.405					515	0.353		515	0.436		515	0.431		515	0.356		515	0.282		515	0.434					515	0.412
516	0.362		516	0.385					516	0.388		516	0.356		516	0.439		516	0.162		516	0.406		516	0.414					516	0.396
517	0.369		517	0.341					517	0.357		517	0.348		517	0.402		517	0.392		517	0.287		517	0.45					517	0.414
518	0.25		518	0.403					518	0.388		518	0.395		518	0.439		518	0.24		518	0.344		518	0.417					518	0.408
519	0.382		519	0.402					519	0.334		519	0.345		519	0.41		519	0.445		519	0.189		519	0.46					519	0.399
520	0.383		520	0.358					520	0.303		520	0.407		520	0.484		520	0.22		520	0.392		520	0.466					520	0.44
521	0.305		521	0.352					521	0.205		521	0.424		521	0.338		521	0.374		521	0.367		521	0.443					521	0.435
522	0.211		522	0.337					522	0.407		522	0.394		522	0.331		522	0.416		522	0.328		522	0.462					522	0.269
523	0.391		523	0.416					523	0.426		523	0.475		523	0.471		523	0.324		523	0.404		523	0.425					523	0.295
524	0.396		524	0.268					524	0.419		524	0.422		524	0.538		524	0.164		524	0.269		524	0.426					524	0.442
525	0.447		525	0.364					525	0.358					525	0.446		525	0.195		525	0.249		525	0.448					525	0.246
526	0.365		526	0.337					526	0.377					526	0.423		526	0.284		526	0.374		526	0.444					526	0.413
527	0.418		527	0.371					527	0.328					527	0.376		527	0.213		527	0.386		527	0.508					527	0.394
528	0.388		528	0.438					528	0.352					528	0.305		528	0.114		528	0.332		528	0.438					528	0.316
529	0.388		529	0.366					529	0.356					529	0.329		529	0.289		529	0.408		529	0.46					529	0.353
530	0.45		530	0.425					530	0.373					530	0.42		530	0.2		530	0.411		530	0.487					530	0.401
531	0.438		531	0.387					531	0.113					531	0.423		531	0.346		531	0.399		531	0.253					531	0.408
532	0.411		532	0.282					532	0.328					532	0.332		532	0.406		532	0.11		532	0.47					532	0.382
533	0.446		533	0.399					533	0.349					533	0.52		533	0.317		533	0.421		533	0.423					533	0.398
534	0.29		534	0.382					534	0.279					534	0.446		534	0.136		534	0.361		534	0.408					534	0.365
535	0.173		535	0.362					535	0.424					535	0.367		535	0.377		535	0.398		535	0.536					535	0.374
536	0.353		536	0.424					536	0.429					536	0.4		536	0.12		536	0.373		536	0.465					536	0.387
537	0.399		537	0.308					537	0.236					537	0.462		537	0.302		537	0.364		537	0.467					537	0.374
538	0.487		538	0.385					538	0.43					538	0.309		538	0.288		538	0.432		538	0.411					538	0.358
539	0.386		539	0.382					539	0.363					539	0.399		539	0.358		539	0.411		539	0.499					539	0.333
540	0.381		540	0.397					540	0.371					540	0.366		540	0.348		540	0.426		540	0.245					540	0.414
541	0.316		541	0.401					541	0.388					541	0.384		541	0.334		541	0.388		541	0.447					541	0.369
542	0.357		542	0.336					542	0.348					542	0.422		542	0.378		542	0.25		542	0.453					542	0.386
543	0.359		543	0.382					543	0.412					543	0.271		543	0.093		543	0.312		543	0.456					543	0.399
544	0.311		544	0.337					544	0.341					544	0.432		544	0.385		544	0.404		544	0.483					544	0.428
545	0.138		545	0.475					545	0.371					545	0.442		545	0.141		545	0.262		545	0.417					545	0.396
546	0.393		546	0.392					546	0.137					546	0.389		546	0.338		546	0.313		546	0.41					546	0.421
547	0.442		547	0.359					547	0.379					547	0.473		547	0.335		547	0.451		547	0.483					547	0.448
548	0.384		548	0.421					548	0.293					548	0.37		548	0.207		548	0.308		548	0.453					548	0.372
549	0.28		549	0.475					549	0.32					549	0.409		549	0.3		549	0.284		549	0.328					549	0.457
550	0.395		550	0.449					550	0.345					550	0.476		550	0.351		550	0.448		550	0.391					550	0.313
551	0.408		551	0.375					551	0.38					551	0.295		551	0.241		551	0.179		551	0.458					551	0.377
552	0.439		552	0.346					552	0.364					552	0.302		552	0.163		552	0.138		552	0.475					552	0.366
553	0.369		553	0.421					553	0.406					553	0.28		553	0.224		553	0.357		553	0.406					553	0.395
554	0.435		554	0.203					554	0.385					554	0.397		554	0.228		554	0.287		554	0.48					554	0.415
555	0.375		555	0.347					555	0.371					555	0.402		555	0.277		555	0.211		555	0.286					555	0.41
556	0.371		556	0.352					556	0.36					556	0.412		556	0.124		556	0.241		556	0.402					556	0.402
557	0.423		557	0.362					557	0.386					557	0.479		557	0.25		557	0.314		557	0.384					557	0.389
558	0.185		558	0.359					558	0.191					558	0.424		558	0.266		558	0.182		558	0.333					558	0.44
559	0.362		559	0.347					559	0.349					559	0.434		559	0.356		559	0.39		559	0.459					559	0.377
560	0.43		560	0.359					560	0.362					560	0.4		560	0.207		560	0.415		560	0.436					560	0.44
561	0.155		561	0.357					561	0.412					561	0.452		561	0.346		561	0.181		561	0.499					561	0.401
562	0.423		562	0.326					562	0.367					562	0.397		562	0.255		562	0.335		562	0.307					562	0.406
563	0.377		563	0.469					563	0.36					563	0.437		563	0.284		563	0.215		563	0.235					563	0.399
564	0.401		564	0.41					564	0.456					564	0.42		564	0.158		564	0.22		564	0.424					564	0.424
565	0.343		565	0.339					565	0.376					565	0.361		565	0.418		565	0.39		565	0.461					565	0.364
566	0.172		566	0.359					566	0.433					566	0.49		566	0.293		566	0.383		566	0.44					566	0.525
567	0.29		567	0.379					567	0.387					567	0.466		567	0.293		567	0.368		567	0.407					567	0.391
568	0.349		568	0.343					568	0.178					568	0.472		568	0.275		568	0.273		568	0.209					568	0.399
569	0.384		569	0.339					569	0.338					569	0.297		569	0.296		569	0.369		569	0.272					569	0.418
570	0.415		570	0.338					570	0.414					570	0.474		570	0.359		570	0.21		570	0.358					570	0.335
571	0.434		571	0.36					571	0.357					571	0.45		571	0.312		571	0.386		571	0.424					571	0.374
572	0.406		572	0.406					572	0.423					572	0.343		572	0.325		572	0.133		572	0.486					572	0.468
573	0.47		573	0.452					573	0.373					573	0.437		573	0.343		573	0.347		573	0.408					573	0.325
574	0.387		574	0.364					574	0.422					574	0.479		574	0.233		574	0.429		574	0.419					574	0.485
575	0.286		575	0.415					575	0.368					575	0.421		575	0.288		575	0.386		575	0.289					575	0.394
576	0.374		576	0.418					576	0.354					576	0.406		576	0.375		576	0.223		576	0.445					576	0.368
577	0.375		577	0.303					577	0.349					577	0.465		577	0.383		577	0.27		577	0.426					577	0.336
578	0.394		578	0.388					578	0.345					578	0.462		578	0.215		578	0.319		578	0.422					578	0.415
579	0.288		579	0.313					579	0.07					579	0.49		579	0.362		579	0.326		579	0.385					579	0.452
580	0.379		580	0.277					580	0.374					580	0.367		580	0.32		580	0.39		580	0.442					580	0.361
581	0.192		581	0.267					581	0.26					581	0.41		581	0.214		581	0.403		581	0.447					581	0.419
582	0.321		582	0.327					582	0.307					582	0.433		582	0.362		582	0.411		582	0.453					582	0.207
583	0.382		583	0.405					583	0.308					583	0.397		583	0.133		583	0.392		583	0.41					583	0.401
584	0.395		584	0.403					584	0.36					584	0.308		584	0.387		584	0.212		584	0.364					584	0.405
585	0.422		585	0.42					585	0.403					585	0.411		585	0.244		585	0.346		585	0.331					585	0.39
586	0.385		586	0.342					586	0.343					586	0.396		586	0.375		586	0.371		586	0.473					586	0.379
587	0.363		587	0.368					587	0.351					587	0.499		587	0.313		587	0.36		587	0.204					587	0.422
588	0.429		588	0.35					588	0.395					588	0.448		588	0.15		588	0.358		588	0.457					588	0.431
589	0.413		589	0.369					589	0.296					589	0.437		589	0.356		589	0.408		589	0.42					589	0.365
590	0.403		590	0.406					590	0.434					590	0.435		590	0.276		590	0.114		590	0.408					590	0.358
591	0.396		591	0.191					591	0.23					591	0.115		591	0.36		591	0.177		591	0.47					591	0.342
592	0.35		592	0.286					592	0.402					592	0.464		592	0.386		592	0.193		592	0.476					592	0.274
593	0.434		593	0.473					593	0.462					593	0.357		593	0.231		593	0.416		593	0.486					593	0.228
594	0.426		594	0.423					594	0.405					594	0.351		594	0.352		594	0.333		594	0.514					594	0.392
595	0.174		595	0.489					595	0.419					595	0.094		595	0.421		595	0.432		595	0.475					595	0.367
596	0.365		596	0.359					596	0.394					596	0.253		596	0.235		596	0.329		596	0.478					596	0.263
597	0.387		597	0.363					597	0.366					597	0.444		597	0.259		597	0.285		597	0.438					597	0.436
598	0.415		598	0.435					598	0.398					598	0.494		598	0.439		598	0.331		598	0.414					598	0.388
599	0.295		599	0.382					599	0.337					599	0.448		599	0.199		599	0.419		599	0.283					599	0.392
600	0.415		600	0.34					600	0.328					600	0.399		600	0.354		600	0.422		600	0.461					600	0.41
601	0.297		601	0.371					601	0.473					601	0.277		601	0.183		601	0.122		601	0.483					601	0.233
602	0.298		602	0.391					602	0.331					602	0.432		602	0.36		602	0.348		602	0.503					602	0.421
603	0.28		603	0.373					603	0.188					603	0.465		603	0.357		603	0.409		603	0.399					603	0.249
604	0.397		604	0.362					604	0.336					604	0.437		604	0.427		604	0.408		604	0.44					604	0.391
605	0.386		605	0.403					605	0.343					605	0.393		605	0.288		605	0.384		605	0.493					605	0.434
606	0.332		606	0.401					606	0.282					606	0.18		606	0.107		606	0.352		606	0.444					606	0.367
607	0.449		607	0.462					607	0.426					607	0.386		607	0.256		607	0.379		607	0.423					607	0.402
608	0.398		608	0.371					608	0.35					608	0.407		608	0.354		608	0.407		608	0.203					608	0.422
609	0.31		609	0.297					609	0.399					609	0.444		609	0.384		609	0.214		609	0.425					609	0.457
610	0.358		610	0.443					610	0.347					610	0.432		610	0.37		610	0.348		610	0.402					610	0.264
611	0.392		611	0.358					611	0.394					611	0.436		611	0.189		611	0.401		611	0.449					611	0.383
612	0.398		612	0.294					612	0.157					612	0.43		612	0.395		612	0.329		612	0.508					612	0.41
613	0.401		613	0.418					613	0.361					613	0.407		613	0.384		613	0.373		613	0.491					613	0.338
614	0.4		614	0.342					614	0.333					614	0.428		614	0.16		614	0.406		614	0.544					614	0.396
615	0.407		615	0.394					615	0.23					615	0.32		615	0.406		615	0.379		615	0.336					615	0.407
616	0.416		616	0.353					616	0.404					616	0.429		616	0.255		616	0.354		616	0.509					616	0.401
617	0.447		617	0.382					617	0.395					617	0.394		617	0.232		617	0.187		617	0.396					617	0.516
618	0.237		618	0.375					618	0.379					618	0.432		618	0.392		618	0.233		618	0.516					618	0.22
619	0.455		619	0.412					619	0.321					619	0.448		619	0.36		619	0.406		619	0.4					619	0.47
620	0.405		620	0.438					620	0.445					620	0.437		620	0.384		620	0.394		620	0.455					620	0.388
621	0.388		621	0.252					621	0.369					621	0.239		621	0.293		621	0.228		621	0.422					621	0.366
622	0.379		622	0.343					622	0.405					622	0.399		622	0.279		622	0.37		622	0.469					622	0.2
623	0.352		623	0.345					623	0.334					623	0.389		623	0.372		623	0.347		623	0.441					623	0.396
624	0.41		624	0.362					624	0.381					624	0.425		624	0.209		624	0.422		624	0.473					624	0.178
625	0.374		625	0.325					625	0.29					625	0.302		625	0.385		625	0.394		625	0.313					625	0.462
626	0.426		626	0.35					626	0.299					626	0.434		626	0.377		626	0.406		626	0.271					626	0.382
627	0.379		627	0.337					627	0.315					627	0.509		627	0.376		627	0.275		627	0.483					627	0.364
628	0.397		628	0.166					628	0.293					628	0.382		628	0.325		628	0.163		628	0.438					628	0.419
629	0.354		629	0.44					629	0.352					629	0.4		629	0.286		629	0.408		629	0.278					629	0.376
630	0.36		630	0.286					630	0.359					630	0.458		630	0.281		630	0.388		630	0.436					630	0.482
631	0.21		631	0.347					631	0.327					631	0.448		631	0.424		631	0.229		631	0.418					631	0.433
632	0.268		632	0.313					632	0.169					632	0.397		632	0.16		632	0.441		632	0.454					632	0.4
633	0.37		633	0.284					633	0.387					633	0.253		633	0.474		633	0.186		633	0.279					633	0.388
634	0.241		634	0.436					634	0.378					634	0.306		634	0.395		634	0.358		634	0.415					634	0.458
635	0.387		635	0.375					635	0.376					635	0.427		635	0.377		635	0.401		635	0.341					635	0.346
636	0.245		636	0.267					636	0.4					636	0.374		636	0.224		636	0.249		636	0.336					636	0.325
637	0.427		637	0.331					637	0.364					637	0.379		637	0.32		637	0.412		637	0.494					637	0.431
638	0.376		638	0.322					638	0.425					638	0.443		638	0.397		638	0.392		638	0.395					638	0.436
639	0.4		639	0.352					639	0.449					639	0.486		639	0.279		639	0.416		639	0.502					639	0.378
640	0.329		640	0.408					640	0.371					640	0.246		640	0.394		640	0.173		640	0.499					640	0.375
641	0.313		641	0.394					641	0.326					641	0.484		641	0.168		641	0.427		641	0.454					641	0.32
642	0.321		642	0.314					642	0.39					642	0.425		642	0.247		642	0.453		642	0.379					642	0.381
643	0.424		643	0.172					643	0.226					643	0.397		643	0.274		643	0.243		643	0.386					643	0.426
644	0.33		644	0.402					644	0.352					644	0.475		644	0.241		644	0.342		644	0.263					644	0.406
645	0.376		645	0.443					645	0.37					645	0.266		645	0.306		645	0.353		645	0.444					645	0.41
646	0.395		646	0.361					646	0.223					646	0.333		646	0.231		646	0.452		646	0.471					646	0.448
647	0.33		647	0.377					647	0.28					647	0.48		647	0.359		647	0.177		647	0.447					647	0.357
648	0.446		648	0.416					648	0.333					648	0.43		648	0.145		648	0.349		648	0.467					648	0.372
649	0.333		649	0.464					649	0.403					649	0.463		649	0.274		649	0.37		649	0.351					649	0.411
650	0.421		650	0.337					650	0.37					650	0.401		650	0.427		650	0.37		650	0.315					650	0.44
651	0.371		651	0.379					651	0.303					651	0.349		651	0.255		651	0.117		651	0.439					651	0.388
652	0.391		652	0.369					652	0.316					652	0.22		652	0.319		652	0.383		652	0.449					652	0.371
653	0.405		653	0.342					653	0.211					653	0.411		653	0.138		653	0.234		653	0.478					653	0.457
654	0.298		654	0.404					654	0.388					654	0.474		654	0.338		654	0.427		654	0.467					654	0.37
655	0.392		655	0.334					655	0.363					655	0.397		655	0.212		655	0.149		655	0.439					655	0.187
656	0.396		656	0.338					656	0.275					656	0.39		656	0.372		656	0.404		656	0.429					656	0.422
657	0.414		657	0.389					657	0.354					657	0.36		657	0.388		657	0.283		657	0.442					657	0.428
658	0.301		658	0.4					658	0.381					658	0.45		658	0.375		658	0.36		658	0.428					658	0.421
659	0.189		659	0.293					659	0.365					659	0.407		659	0.281		659	0.295		659	0.468					659	0.447
660	0.385		660	0.277					660	0.24					660	0.447		660	0.384		660	0.39		660	0.497					660	0.429
661	0.413		661	0.353					661	0.407					661	0.342		661	0.406		661	0.409		661	0.217					661	0.427
662	0.374		662	0.436					662	0.216					662	0.435		662	0.262		662	0.368		662	0.474					662	0.366
663	0.416		663	0.185					663	0.357					663	0.422		663	0.084		663	0.201		663	0.488					663	0.49
664	0.449		664	0.271					664	0.343					664	0.419		664	0.069		664	0.388		664	0.469					664	0.434
665	0.427		665	0.414					665	0.371					665	0.407		665	0.307		665	0.409		665	0.307					665	0.391
666	0.397		666	0.327					666	0.356					666	0.44					666	0.127		666	0.445					666	0.442
667	0.418		667	0.38					667	0.366					667	0.43					667	0.314		667	0.427					667	0.459
668	0.363		668	0.328					668	0.406					668	0.43					668	0.394		668	0.3					668	0.493
669	0.366		669	0.344					669	0.326					669	0.403					669	0.359		669	0.497					669	0.324
670	0.339		670	0.337					670	0.153					670	0.416					670	0.408		670	0.468					670	0.364
671	0.474		671	0.174					671	0.396					671	0.425					671	0.411		671	0.511					671	0.413
672	0.28		672	0.314					672	0.33					672	0.469					672	0.334		672	0.467					672	0.422
673	0.375		673	0.385					673	0.342					673	0.43					673	0.274		673	0.242					673	0.376
674	0.392		674	0.362					674	0.276					674	0.441					674	0.353		674	0.491					674	0.438
675	0.386		675	0.388					675	0.362					675	0.357					675	0.407		675	0.448					675	0.244
676	0.413		676	0.359					676	0.193					676	0.362					676	0.368		676	0.352					676	0.385
677	0.353		677	0.333					677	0.334					677	0.444					677	0.274		677	0.47					677	0.498
678	0.193		678	0.342					678	0.366					678	0.45					678	0.138		678	0.5					678	0.437
679	0.23		679	0.373					679	0.396					679	0.435					679	0.321		679	0.477					679	0.46
680	0.382		680	0.239					680	0.196					680	0.464					680	0.157		680	0.503					680	0.404
681	0.414								681	0.365					681	0.403					681	0.425		681	0.523					681	0.397
682	0.371								682	0.381					682	0.398					682	0.402		682	0.502					682	0.495
683	0.362								683	0.349					683	0.273					683	0.422		683	0.491					683	0.329
684	0.454								684	0.428					684	0.404					684	0.277		684	0.454					684	0.375
685	0.412								685	0.382					685	0.396					685	0.423		685	0.182					685	0.475
686	0.271								686	0.376					686	0.39					686	0.407		686	0.481					686	0.486
687	0.399								687	0.43					687	0.451					687	0.204		687	0.397					687	0.464
688	0.411								688	0.381					688	0.443					688	0.388		688	0.468					688	0.454
689	0.374								689	0.263					689	0.469					689	0.397		689	0.36					689	0.37
690	0.408								690	0.338					690	0.4					690	0.383		690	0.413					690	0.385
691	0.384								691	0.337					691	0.436					691	0.413		691	0.436					691	0.416
692	0.358								692	0.343					692	0.456					692	0.434		692	0.242					692	0.485
693	0.404								693	0.321					693	0.403					693	0.376		693	0.45					693	0.392
694	0.409								694	0.277					694	0.371					694	0.298		694	0.375					694	0.34
695	0.271								695	0.393					695	0.322					695	0.353		695	0.4					695	0.38
696	0.395								696	0.351					696	0.457					696	0.406		696	0.498					696	0.382
697	0.263								697	0.358					697	0.412					697	0.399		697	0.431					697	0.412
698	0.411								698	0.394					698	0.506					698	0.369		698	0.446					698	0.412
699	0.349								699	0.375					699	0.467					699	0.268		699	0.296					699	0.435
700	0.474								700	0.407					700	0.336					700	0.391		700	0.495					700	0.351
701	0.403								701	0.301					701	0.39					701	0.251		701	0.302					701	0.453
702	0.461								702	0.394					702	0.418					702	0.313		702	0.43					702	0.38
703	0.39								703	0.354					703	0.476					703	0.354		703	0.348					703	0.397
704	0.398								704	0.416					704	0.406					704	0.282		704	0.287					704	0.402
705	0.346								705	0.38					705	0.351					705	0.261		705	0.424					705	0.457
706	0.437								706	0.394					706	0.444					706	0.393		706	0.167					706	0.442
707	0.366								707	0.405					707	0.365					707	0.422		707	0.43					707	0.31
708	0.4								708	0.326					708	0.369					708	0.357		708	0.453					708	0.419
709	0.384								709	0.414					709	0.429					709	0.394		709	0.414					709	0.341
710	0.414								710	0.244					710	0.523					710	0.354								710	0.412
711	0.393								711	0.417					711	0.425					711	0.371								711	0.381
712	0.441								712	0.335					712	0.36					712	0.442								712	0.425
713	0.403								713	0.455					713	0.371					713	0.36								713	0.426
714	0.375								714	0.388					714	0.388					714	0.221								714	0.417
715	0.36								715	0.388					715	0.458					715	0.33								715	0.415
716	0.384								716	0.4					716	0.407					716	0.351								716	0.445
717	0.248								717	0.386					717	0.439					717	0.38								717	0.327
718	0.339								718	0.363					718	0.432					718	0.428								718	0.424
719	0.42								719	0.351					719	0.36					719	0.377								719	0.464
720	0.381								720	0.353					720	0.45					720	0.405								720	0.412
721	0.351								721	0.295					721	0.4					721	0.357								721	0.377
722	0.366								722	0.319					722	0.182					722	0.367								722	0.358
723	0.438								723	0.375					723	0.468					723	0.244								723	0.457
724	0.356								724	0.393					724	0.391					724	0.316								724	0.379
725	0.455								725	0.42					725	0.444					725	0.428								725	0.431
726	0.427								726	0.168					726	0.48					726	0.414								726	0.164
727	0.415								727	0.336					727	0.455					727	0.412								727	0.407
728	0.324								728	0.077					728	0.357					728	0.41								728	0.43
729	0.422								729	0.469					729	0.418					729	0.376								729	0.376
730	0.392								730	0.395					730	0.474					730	0.127								730	0.449
731	0.434								731	0.438					731	0.485					731	0.387								731	0.382
732	0.401								732	0.343					732	0.49					732	0.391								732	0.434
733	0.369								733	0.367					733	0.392					733	0.377								733	0.421
734	0.415								734	0.395					734	0.432					734	0.459								734	0.423
735	0.486								735	0.339					735	0.405					735	0.347								735	0.39
736	0.367								736	0.429					736	0.451					736	0.196								736	0.427
737	0.36								737	0.393					737	0.36					737	0.413								737	0.365
738	0.454								738	0.176					738	0.428					738	0.405								738	0.462
739	0.381								739	0.342					739	0.143					739	0.391								739	0.421
740	0.267								740	0.388					740	0.505					740	0.115								740	0.41
741	0.465								741	0.36					741	0.421					741	0.325								741	0.358
742	0.381								742	0.369					742	0.434					742	0.266								742	0.472
743	0.349								743	0.347					743	0.409					743	0.124								743	0.378
744	0.44								744	0.327					744	0.48					744	0.378								744	0.345
745	0.458								745	0.353											745	0.445								745	0.416
746	0.44								746	0.232											746	0.15								746	0.46
747	0.268								747	0.204											747	0.218								747	0.379
748	0.428								748	0.366											748	0.412								748	0.367
749	0.409								749	0.334											749	0.223								749	0.37
750	0.43								750	0.345											750	0.37								750	0.394
751	0.377								751	0.356											751	0.238								751	0.486
752	0.311								752	0.357											752	0.449								752	0.389
753	0.405								753	0.426											753	0.357								753	0.445
754	0.367								754	0.387											754	0.379								754	0.434
755	0.353								755	0.347											755	0.427								755	0.462
756	0.284								756	0.279											756	0.317								756	0.407
757	0.412								757	0.098											757	0.394								757	0.353
758	0.54								758	0.281											758	0.313								758	0.356
759	0.395								759	0.437											759	0.383								759	0.467
760	0.444								760	0.388											760	0.367								760	0.432
761	0.437								761	0.088											761	0.271								761	0.432
762	0.425								762	0.266											762	0.371								762	0.403
763	0.363								763	0.415											763	0.397								763	0.41
764	0.473								764	0.369											764	0.415								764	0.419
765	0.367								765	0.213											765	0.385								765	0.425
766	0.435								766	0.395											766	0.412								766	0.462
767	0.228								767	0.202											767	0.438								767	0.475
768	0.447								768	0.364											768	0.382								768	0.467
769	0.414								769	0.238											769	0.395								769	0.364
770	0.434								770	0.285											770	0.394								770	0.411
771	0.45								771	0.351											771	0.388								771	0.38
772	0.401								772	0.156											772	0.378								772	0.421
773	0.423								773	0.428											773	0.397								773	0.454
774	0.458								774	0.362											774	0.428								774	0.351
775	0.31								775	0.406											775	0.282								775	0.263
776	0.401								776	0.352											776	0.373								776	0.363
777	0.392								777	0.408											777	0.458								777	0.454
778	0.439								778	0.329											778	0.252								778	0.292
779	0.415								779	0.375											779	0.416								779	0.416
780	0.457								780	0.38											780	0.391								780	0.398
781	0.485								781	0.261											781	0.405								781	0.361
782	0.444																				782	0.357								782	0.385
783	0.407																				783	0.361								783	0.404
784	0.393																				784	0.413								784	0.389
785	0.242																				785	0.329								785	0.158
786	0.401																				786	0.351								786	0.424
787	0.216																				787	0.417								787	0.486
788	0.494																				788	0.379								788	0.311
789	0.229																				789	0.22								789	0.315
790	0.398																				790	0.144								790	0.136
791	0.436																				791	0.467								791	0.397
792	0.53																				792	0.398								792	0.396
793	0.441																				793	0.431								793	0.478
794	0.403																				794	0.364								794	0.411
795	0.447																				795	0.417								795	0.438
796	0.428																				796	0.316								796	0.411
797	0.409																				797	0.197								797	0.195
798	0.462																				798	0.252								798	0.413
799	0.398																				799	0.137								799	0.406
800	0.454																				800	0.419								800	0.165
801	0.414																				801	0.369								801	0.348
802	0.426																				802	0.328								802	0.403
803	0.418																				803	0.192								803	0.445
804	0.326																				804	0.411								804	0.399
805	0.439																				805	0.391								805	0.528
806	0.435																				806	0.405								806	0.48
807	0.434																				807	0.119								807	0.455
808	0.401																				808	0.198								808	0.414
809	0.392																				809	0.369								809	0.455
810	0.458																				810	0.416								810	0.394
811	0.227																				811	0.146								811	0.385
812	0.391																				812	0.384								812	0.439
813	0.404																				813	0.37								813	0.393
814	0.444																				814	0.071								814	0.463
815	0.458																				815	0.234								815	0.426
816	0.502																				816	0.282
817	0.453																				817	0.46
818	0.393																				818	0.265
819	0.434																				819	0.429
820	0.357																				820	0.271
821	0.411																				821	0.42
822	0.388																				822	0.45
823	0.417																				823	0.312
824	0.407																				824	0.305
825	0.406																				825	0.431
826	0.453																				826	0.366
827	0.499																				827	0.418
828	0.4																				828	0.423
829	0.397																				829	0.289
830	0.409																				830	0.363
831	0.506																				831	0.34
832	0.447																				832	0.344
833	0.402																				833	0.382
834	0.392																				834	0.367
835	0.443																				835	0.388
836	0.411																				836	0.441
837	0.37																				837	0.423
838	0.41																				838	0.274
839	0.379																				839	0.38
840	0.279																				840	0.385
841	0.379																				841	0.176
842	0.437																				842	0.1
843	0.365																				843	0.42
844	0.368																				844	0.437
845	0.342																				845	0.393
846	0.499																				846	0.255
847	0.321																				847	0.42
848	0.347																				848	0.388
849	0.423																				849	0.437
850	0.36																				850	0.406
851	0.386																				851	0.312
852	0.392																				852	0.396
853	0.4																				853	0.378
854	0.374																				854	0.378
855	0.452																				855	0.174
856	0.284																				856	0.201
857	0.415																				857	0.353
858	0.227																				858	0.378
859	0.421																				859	0.375
860	0.395																				860	0.406
861	0.448																				861	0.318
862	0.373																				862	0.426
863	0.445																				863	0.289
864	0.416																				864	0.388
865	0.418																				865	0.423
866	0.403																				866	0.392
867	0.412																				867	0.201
868	0.331																				868	0.379
869	0.4																				869	0.424
870	0.427																				870	0.412
871	0.356																				871	0.125
872	0.389																				872	0.188
873	0.414																				873	0.341
874	0.332																				874	0.183
875	0.417																				875	0.335
876	0.399																				876	0.177
877	0.407																				877	0.443
878	0.435																				878	0.43
879	0.418																				879	0.257
880	0.445																				880	0.402
881	0.284																				881	0.152
882	0.391																				882	0.35
883	0.39																				883	0.376
884	0.313																				884	0.231
885	0.422																				885	0.148
886	0.351																				886	0.374
887	0.406																				887	0.393
888	0.391																				888	0.093
889	0.427																				889	0.14
890	0.419																				890	0.374
891	0.235																				891	0.348
892	0.423																				892	0.219
893	0.421																				893	0.361
894	0.394																				894	0.405
895	0.247																				895	0.322
896	0.398																				896	0.379
897	0.41																				897	0.378
898	0.444																				898	0.41
899	0.449																				899	0.302
900	0.394																				900	0.243
901	0.339																				901	0.372
902	0.383																				902	0.139
903	0.371																				903	0.322
904	0.377																				904	0.441
905	0.459																				905	0.215
906	0.381																				906	0.188
907	0.365																				907	0.293
908	0.401																				908	0.414
909	0.438																				909	0.394
910	0.393																				910	0.401
911	0.363																				911	0.336
912	0.386																				912	0.378
913	0.384																				913	0.406
914	0.411																				914	0.288
915	0.401																				915	0.376
916	0.382																				916	0.414
917	0.363																				917	0.445
918	0.269																				918	0.408
919	0.354																				919	0.274
920	0.444																				920	0.304
921	0.377																				921	0.297
922	0.357																				922	0.128
923	0.449																				923	0.36
924	0.44																				924	0.393
925	0.432																				925	0.397
926	0.388																				926	0.329
927	0.295																				927	0.117
928	0.418																				928	0.225
929	0.437																				929	0.242
930	0.427																				930	0.357
931	0.282																				931	0.372
932	0.445																				932	0.286
933	0.306																				933	0.268
934	0.37																				934	0.24
935	0.463																				935	0.33
936	0.355																				936	0.347
937	0.436																				937	0.39
938	0.37																				938	0.083
939	0.374																				939	0.197
940	0.444																				940	0.369
941	0.422																				941	0.244
942	0.376																				942	0.167
943	0.364																				943	0.345
944	0.438																				944	0.305
945	0.369																				945	0.179
946	0.38																				946	0.264
947	0.373																				947	0.362
948	0.443																				948	0.405
949	0.345																				949	0.429
950	0.187																				950	0.178
951	0.266																				951	0.463
952	0.395																				952	0.34
953	0.253																				953	0.289
954	0.371																				954	0.431
955	0.345																				955	0.447
956	0.221																				956	0.409
957	0.394																				957	0.411
958	0.365																				958	0.453
959	0.39																				959	0.124
960	0.458																				960	0.395
961	0.39																				961	0.213
962	0.379																				962	0.249
963	0.408																				963	0.409
964	0.386																				964	0.211
965	0.427																				965	0.265
966	0.487																				966	0.411
967	0.421																				967	0.443
968	0.382																				968	0.177
969	0.387																				969	0.44
970	0.471																				970	0.448
971	0.411																				971	0.368
972	0.324																				972	0.411
973	0.415																				973	0.431
974	0.406																				974	0.441
975	0.382																				975	0.269
976	0.401																				976	0.392
977	0.203																				977	0.35
978	0.422																				978	0.125
979	0.234																				979	0.377
980	0.407																				980	0.263
981	0.317																				981	0.24
982	0.442																				982	0.392
983	0.371																				983	0.42
984	0.402																				984	0.147
985	0.413																				985	0.379
986	0.236																				986	0.404
987	0.405																				987	0.413
988	0.36																				988	0.409
989	0.36																				989	0.254
990	0.434																				990	0.21
991	0.416																				991	0.313
992	0.419																				992	0.395
993	0.424																				993	0.155
994	0.447																				994	0.247
995	0.437																				995	0.218
996	0.425																				996	0.411
997	0.417																				997	0.313
998	0.428																				998	0.361
999	0.406																				999	0.255
1000	0.377																				1000	0.38
1001	0.409																				1001	0.288
1002	0.411																				1002	0.312
1003	0.426																				1003	0.129
1004	0.404																				1004	0.42
1005	0.409																				1005	0.349
1006	0.379																				1006	0.448
1007	0.426																				1007	0.269
1008	0.431																				1008	0.188
1009	0.392																				1009	0.165
1010	0.368																				1010	0.277
1011	0.289																				1011	0.261
1012	0.372																				1012	0.285
1013	0.42																				1013	0.291
1014	0.496																				1014	0.271
1015	0.439																				1015	0.387
1016	0.445																				1016	0.273
1017	0.397																				1017	0.429
1018	0.43																				1018	0.468
1019	0.367																				1019	0.478
1020	0.392																				1020	0.221
1021	0.227																				1021	0.464
1022	0.468																				1022	0.403
1023	0.368																				1023	0.411
1024	0.397																				1024	0.393
1025	0.437																				1025	0.418
1026	0.369																				1026	0.133
1027	0.275																				1027	0.419
1028	0.471																				1028	0.319
1029	0.405																				1029	0.297
1030	0.223																				1030	0.445
1031	0.357																				1031	0.418
1032	0.439																				1032	0.366
1033	0.499																				1033	0.383
1034	0.437																				1034	0.192
1035	0.408																				1035	0.38
1036	0.344																				1036	0.392
1037	0.398																				1037	0.368
1038	0.265																				1038	0.31
1039	0.38																				1039	0.284
1040	0.441																				1040	0.476
1041	0.297																				1041	0.359
1042	0.423																				1042	0.415
1043	0.333																				1043	0.23
1044	0.276																				1044	0.351
1045	0.416																				1045	0.43
																					1046	0.245
																					1047	0.186
																					1048	0.166
																					1049	0.426
																					1050	0.354
																					1051	0.427
																					1052	0.227
																					1053	0.403
																					1054	0.388
																					1055	0.258
																					1056	0.363
																					1057	0.435
																					1058	0.426
																					1059	0.199
																					1060	0.46
																					1061	0.137
																					1062	0.325
																					1063	0.358
																					1064	0.404
																					1065	0.422
																					1066	0.434
																					1067	0.375
																					1068	0.285
																					1069	0.284
																					1070	0.398
																					1071	0.287
																					1072	0.364
																					1073	0.284
																					1074	0.302
																					1075	0.401
																					1076	0.385
																					1077	0.263
																					1078	0.425
																					1079	0.411
																					1080	0.356
																					1081	0.218
																					1082	0.343
																					1083	0.37
																					1084	0.331
																					1085	0.241
																					1086	0.28
																					1087	0.33
																					1088	0.234
																					1089	0.176
																					1090	0.361
																					1091	0.389
																					1092	0.372
																					1093	0.209
																					1094	0.369
																					1095	0.382
																					1096	0.397
																					1097	0.401
																					1098	0.395
																					1099	0.358
																					1100	0.229
																					1101	0.453
																					1102	0.412
																					1103	0.302
																					1104	0.447
																					1105	0.22
																					1106	0.418
																					1107	0.421
																					1108	0.341
																					1109	0.366
																					1110	0.33
																					1111	0.252
																					1112	0.373
																					1113	0.331
																					1114	0.416
																					1115	0.46
																					1116	0.365
																					1117	0.284
																					1118	0.229
																					1119	0.415
																					1120	0.11
																					1121	0.185
																					1122	0.444
																					1123	0.246
																					1124	0.367
																					1125	0.381
																					1126	0.416
																					1127	0.418
																					1128	0.372
																					1129	0.323
																					1130	0.343
																					1131	0.384
																					1132	0.413
																					1133	0.22
																					1134	0.338
																					1135	0.224
																					1136	0.374
																					1137	0.266
																					1138	0.348
																					1139	0.447
																					1140	0.216
																					1141	0.398
																					1142	0.434

## Sheet: Fig-2C
		Functional enrichment analysis			GO_slim		C - Cellular component, F - Molecular function, P - Biological process
					% of genes	% of genes
			Function	GO number	observed	expected
	Class	orange
		F	helicase_activity	GO:0004386	5.13	0.97
		F	ligase_activity	GO:0016874	6.41	1.46
		P	mitochondrial_translation	GO:0032543	14.1	5.62
	Class	magenta
		C	mitochondrial_envelope	GO:0005740	12.7	6.7
		C	mitochondrion	GO:0005739	30.27	23.83
		P	cellular_respiration	GO:0045333	4.59	1.57
		P	DNA_recombination	GO:0006310	5.95	2.43
		P	protein_complex_biogenesis	GO:0070271	11.35	6.35
		P	organelle_inheritance	GO:0048308	3.51	1.13
		P	protein_maturation	GO:0051604	3.51	1.3
		P	nucleus_organization	GO:0006997	2.43	0.78
		P	chromosome_segregation	GO:0007059	4.32	2
		P	RNA_splicing	GO:0008380	3.51	1.48
		P	generation_of_precursor_metabolites_and_energy	GO:0006091	5.41	2.87
		P	regulation_of_translation	GO:0006417	4.32	2.09
		P	organelle_fission	GO:0048285	7.84	4.78
		P	mRNA_processing	GO:0006397	4.32	2.17
		P	DNA_replication	GO:0006260	3.78	1.83
		P	endocytosis	GO:0006897	3.24	1.48
	Class	red
		P	carbohydrate_transport	GO:0008643	4.17	0.14
	Class	blue
		F	transmembrane_transporter_activity	GO:0022857	10.31	4.29
		F	hydrolase_activity,_acting_on_glycosyl_bonds	GO:0016798	3.09	0.21

## Sheet: Fig-2D
		Mean growth rate (h-1)		Noise (CV)
	Strain	Average	Stdev	Average	Stdev	Colour
	WT	0.377	0.0165	0.171	0.001	black
	WT	0.382	0.0132	0.163	0.0083	black
	WT	0.401	0.007	0.162	0	black
	WT	0.394	0.0057	0.171	0.0057	black
	WT	0.387	0.0045	0.168	0.0139	black
	WT	0.398	0.0082	0.164	0.0037	black
	WT	0.396	0.0086	0.169	0.0054	black
	WT	0.395	0.004	0.155	0.0055	black
	WT	0.387	0.0028	0.171	0.0009	black
	WT	0.41	0.0028	0.163	0.0071	black
	WT	0.414	0.0105	0.166	0.003	black
	WT	0.407	0.0095	0.169	0.011	black
	WT	0.385	0.004	0.17	0.002	black
	WT	0.391	0.0037	0.176	0.0016	black
	WT	0.397	0.009	0.163	0.0075	black
	WT	0.384	0.003	0.163	0.008	black
	WT	0.389	0.0049	0.16	0.0021	black
	WT	0.392	0.0012	0.159	0.0028	black
	WT	0.395	0.0019	0.157	0.0022	black
	WT	0.382	0.0008	0.164	0.0043	black
	WT	0.39	0.005	0.165	0.0005	black
	WT	0.4	0.0045	0.159	0.007	black
	WT	0.394	0.0043	0.169	0.0012	black
	CPR7	0.29	0.0036	0.195	0.0048	grey
	SUV3	0.354	0.007	0.157	0.0074	grey
	UBP3	0.303	0.0082	0.14	0.0119	grey
	PPT2	0.38	0.0115	0.165	0.0054	grey
	PHO85	0.271	0.0165	0.166	0.0175	grey
	ETR1	0.36	0.0131	0.2	0.0164	grey
	IXR1	0.335	0.0127	0.204	0.0152	grey
	ASC1	0.368	0.0088	0.171	0.0031	grey
	SPT10	0.248	0.0066	0.168	0.0093	grey
	LGE1	0.299	0.0094	0.163	0.0037	grey
	DST1	0.34	0.0073	0.177	0.0193	grey
	RPL7A	0.309	0.012	0.207	0.008	grey
	FUR4	0.116	0.004	0.268	0.0005	grey
	MRE11	0.326	0.0131	0.212	0.0151	grey
	YLR184W	0.293	0.009	0.138	0.0086	grey
	NBP2	0.308	0.0099	0.214	0.0073	grey
	BUD26	0.328	0.0101	0.166	0.0094	grey
	YOR309C	0.293	0.0099	0.154	0.0116	grey
	GTR2	0.369	0.011	0.17	0.0131	grey
	COR1	0.357	0.0128	0.19	0.009	grey
	SLA1	0.334	0.0155	0.195	0.0135	grey
	RPA34	0.359	0.0066	0.161	0.0039	grey
	NIP100	0.362	0.0102	0.151	0.0041	grey
	SIN3	0.3	0.0075	0.218	0	grey
	RPS6A	0.342	0.0123	0.136	0.0039	grey
	MRP51	0.353	0.0096	0.139	0.0069	grey
	VMA13	0.272	0.0076	0.261	0.0119	grey
	ARC18	0.323	0.0028	0.173	0.012	grey
	DOC1	0.219	0.0131	0.18	0.0271	grey
	HTZ1	0.323	0.0082	0.229	0.0029	grey
	COQ8	0.36	0.0117	0.188	0.0037	grey
	VAC8	0.359	0.0078	0.174	0.0158	grey
	RPS18B	0.329	0.0123	0.137	0.009	grey
	IKI3	0.305	0.0131	0.219	0.0093	grey
	LST7	0.279	0.0058	0.178	0.0224	grey
	PET309	0.356	0.0114	0.166	0.0052	grey
	POR1	0.312	0.0074	0.295	0.009	grey
	RPS4A	0.352	0.0094	0.117	0.009	grey
	RPO41	0.324	0.0111	0.157	0.0059	grey
	RPL34A	0.35	0.0078	0.183	0.0036	grey
	RIM13	0.358	0.0098	0.186	0.0052	grey
	TPN1	0.311	0.0143	0.244	0.0184	grey
	SNF4	0.372	0.0074	0.159	0.0139	grey
	HDA3	0.343	0.0075	0.151	0.0105	grey
	COA1	0.392	0.009	0.115	0.0101	grey
	UBI4	0.364	0.0137	0.193	0.009	grey
	MRS1	0.355	0.0104	0.195	0.0076	grey
	NHP10	0.362	0.0065	0.186	0.0045	grey
	YDJ1	0.258	0.007	0.155	0.0066	grey
	CEM1	0.334	0.0105	0.19	0.0078	grey
	MRPL38	0.327	0.0128	0.147	0.0085	grey
	SAC3	0.288	0.0062	0.204	0.007	grey
	CBP1	0.339	0.0135	0.211	0.0106	grey
	RPL13A	0.327	0.0079	0.133	0.0076	grey
	IDH1	0.201	0.004	0.243	0.018	grey
	IWR1	0.313	0.007	0.16	0.0169	grey
	VIP1	0.297	0.011	0.178	0.0065	grey
	MTG2	0.332	0.0108	0.159	0.0118	grey
	TRK1	0.338	0.005	0.265	0.0055	grey
	CBP3	0.356	0.0048	0.19	0.007	grey
	DID4	0.342	0.0126	0.206	0.0109	grey
	YPR117W	0.365	0.01	0.159	0.0069	grey
	RPS6B	0.315	0.0085	0.136	0.009	grey
	VAM6	0.376	0.0087	0.181	0.0095	grey
	FYV12	0.358	0.0065	0.164	0.0085	grey
	RPN4	0.337	0.0067	0.168	0.007	grey
	VPS29	0.182	0.0159	0.316	0.0054	grey
	HTD2	0.336	0.011	0.202	0.023	grey
	YER077C	0.365	0.002	0.184	0.001	grey
	PMR1	0.303	0.0105	0.155	0.005	grey
	MRT4	0.294	0.0125	0.177	0.0235	grey
	RPS4B	0.318	0.0045	0.146	0.0025	grey
	RIM101	0.331	0.0041	0.268	0.0037	grey
	ERG3	0.316	0.009	0.118	0.0107	grey
	OAR1	0.375	0.0068	0.141	0.0123	grey
	SMI1	0.373	0.0065	0.167	0.0177	grey
	MED1	0.29	0.0136	0.207	0.0111	grey
	YPL102C	0.314	0.0071	0.171	0.0022	grey
	MEH1	0.34	0.0031	0.122	0.013	grey
	VPS24	0.359	0.015	0.175	0.0015	grey
	HOF1	0.392	0.0085	0.115	0	grey
	HIT1	0.349	0.008	0.149	0.009	grey
	MCT1	0.35	0.004	0.156	0.011	grey
	RAD27	0.375	0.004	0.141	0.0055	grey
	IES2	0.32	0.006	0.177	0.008	grey
	VPS64	0.334	0.001	0.193	0.013	grey
	RPS21A	0.328	0.0127	0.135	0.0037	grey
	COQ6	0.375	0.0107	0.184	0.0127	grey
	MRPL3	0.347	0.0125	0.136	0.002	grey
	DBP3	0.346	0.0175	0.14	0	grey
	MRPL31	0.397	0.0125	0.158	0.0065	grey
	VMA21	0.357	0.0151	0.134	0.0054	grey
	VAM7	0.325	0.0097	0.179	0.0069	grey
	TPS1	0.315	0.0107	0.157	0.0233	grey
	MTC5	0.382	0.0105	0.151	0.003	grey
	DBF2	0.379	0.0076	0.122	0.0107	grey
	HAP2	0.392	0.0075	0.157	0.006	grey
	YLR358C	0.38	0.0057	0.14	0.0156	grey
	RTF1	0.312	0.0155	0.15	0.0015	grey
	SSN2	0.363	0.014	0.178	0	grey
	FLX1	0.372	0.0122	0.143	0.0126	grey
	COQ9	0.37	0.0085	0.141	0.0024	grey
	SLM3	0.33	0.0175	0.155	0.005	grey
	HDA2	0.323	0.01	0.158	0.002	grey
	MSS51	0.351	0.0075	0.228	0.0105	grey
	RTS1	0.375	0.022	0.127	0.0015	grey
	VMA3	0.206	0.018	0.298	0.026	grey
	IDH2	0.2	0.006	0.248	0.01	grey
	RPS17A	0.286	0.0075	0.151	0.0175	grey
	GLN3	0.292	0.0045	0.168	0.0025	grey
	ISA1	0.365	0.0165	0.129	0.0005	grey
	SPC72	0.364	0.01	0.182	0.0009	grey
	RPL19B	0.314	0.0106	0.138	0.0057	grey
	BUB3	0.324	0.0129	0.204	0.0039	grey
	TIF3	0.391	0.0079	0.18	0.0131	grey
	IRC14	0.271	0.0165	0.162	0.0135	grey
	YTA7	0.334	0.011	0.226	0.009	grey
	FEN2	0.158	0.003	0.3	0.023	grey
	MSH1	0.216	0.0105	0.296	0.0193	grey
	COQ1	0.353	0.0129	0.207	0.0135	grey
	MTF2	0.378	0.0111	0.13	0.0131	grey
	RRP8	0.327	0.0095	0.163	0.0058	grey
	FKS1	0.35	0.0025	0.19	0.0085	grey
	YNL171C	0.277	0.0026	0.216	0.0063	grey
	CTK1	0.308	0.0185	0.285	0.025	grey
	DBP7	0.277	0.0139	0.135	0.0065	grey
	URE2	0.281	0.0143	0.255	0.0154	grey
	DEF1	0.365	0.0065	0.114	0.0035	grey
	HUR1	0.305	0.0075	0.175	0.0155	grey
	ADH1	0.356	0.0165	0.183	0.0085	grey
	FSH1	0.369	0.0054	0.17	0.0043	grey
	YPT6	0.374	0.012	0.137	0.015	grey
	RPS30B	0.376	0.0058	0.141	0.0131	grey
	RPS11B	0.337	0.0116	0.141	0.0114	grey
	FES1	0.34	0.017	0.151	0.0165	grey
	RPP1B	0.329	0.0111	0.154	0.0101	grey
	RPS23A	0.334	0.0103	0.125	0.0116	grey
	NSR1	0.266	0.016	0.16	0.0155	grey
	AEP1	0.323	0.007	0.142	0	grey
	LRS4	0.384	0.0065	0.158	0.0065	grey
	MTM1	0.332	0.0092	0.144	0.0071	grey
	FYV1	0.366	0.0107	0.145	0.0121	grey
	ELP3	0.341	0.004	0.174	0.0025	grey
	RTT109	0.2	0.0106	0.256	0.0114	grey
	UBC4	0.35	0.0068	0.154	0.0057	grey
	YJR084W	0.378	0.0148	0.157	0.0094	grey
	YME1	0.258	0.0095	0.175	0.006	grey
	GET2	0.356	0.0065	0.155	0.0145	grey
	END3	0.284	0.0127	0.153	0.0088	grey
	SGF73	0.356	0.02	0.158	0.0175	grey
	RCY1	0.191	0.0005	0.273	0.001	grey
	SSN8	0.293	0.0135	0.155	0.0125	grey
	CGI121	0.358	0.0135	0.13	0.006	grey
	IKI1	0.323	0.005	0.141	0.0025	grey
	IES3	0.349	0.012	0.257	0.0045	grey
	VAM10	0.387	0.0005	0.166	0.0115	grey
	IRC13	0.361	0.005	0.186	0.008	grey
	MNE1	0.323	0.002	0.241	0.0105	grey
	GCV3	0.344	0.018	0.205	0.0195	grey
	RPS29A	0.316	0.0024	0.146	0.015	grey
	PET100	0.34	0.0055	0.188	0.0105	grey
	MKS1	0.197	0.008	0.272	0.0015	grey
	GIM5	0.357	0.0091	0.159	0.0078	grey
	SRO9	0.387	0.0015	0.189	0.001	grey
	ASF1	0.411	0.0068	0.186	0.0043	grey
	RPS19B	0.389	0.003	0.176	0.0105	grey
	GTR1	0.348	0.0035	0.169	0.001	grey
	MAF1	0.388	0.005	0.177	0.0075	grey
	MAP1	0.224	0.0055	0.196	0.0295	grey
	AIM26	0.375	0.0052	0.184	0.0146	grey
	RPS16B	0.326	0.003	0.168	0.0075	grey
	YGR160W	0.351	0.0025	0.186	0	grey
	YPL080C	0.35	0.001	0.169	0.0025	grey
	IES1	0.377	0.001	0.198	0.0035	grey
	CTF4	0.319	0.0085	0.193	0.0181	grey
	ELP4	0.328	0.005	0.198	0.009	grey
	YBL071C-B	0.314	0.0085	0.238	0.008	grey
	RPS29B	0.311	0	0.193	0.01	grey
	SEC28	0.37	0.011	0.23	0.004	grey
	CCR4	0.343	0.0062	0.164	0.0133	grey
	SPE3	0.271	0.006	0.222	0.0025	grey
	PCP1	0.325	0.0066	0.168	0.009	grey
	CBP6	0.349	0.0069	0.216	0.0106	grey
	TAF14	0.385	0.003	0.188	0.008	grey
	SHE9	0.324	0.0065	0.221	0.009	grey
	CNM67	0.32	0.0065	0.177	0.005	grey
	CTF18	0.361	0.0045	0.208	0.0135	grey
	MRPL24	0.352	0.002	0.227	0.007	grey
	DIG1	0.368	0.0045	0.204	0.0055	grey
	VPS17	0.371	0.0015	0.191	0.002	grey
	VMA4	0.347	0.0049	0.157	0.0139	grey
	SLG1	0.368	0.0075	0.195	0.0165	grey
	ASK10	0.375	0.002	0.177	0.0025	grey
	PET191	0.389	0.003	0.184	0.005	grey
	RPS1A	0.344	0.0125	0.138	0.008	grey
	CTR1	0.333	0.0085	0.157	0.0071	grey
	HAP3	0.334	0.0076	0.128	0.0144	grey
	AAH1	0.263	0.0144	0.218	0.0094	grey
	RTG2	0.201	0.0033	0.272	0.018	grey
	PHO80	0.316	0.006	0.208	0.0055	grey
	VPS51	0.34	0.0055	0.18	0.009	grey
	TGS1	0.324	0.0015	0.2	0.0055	grey
	RPL21B	0.381	0.0055	0.138	0.01	grey
	CDC73	0.383	0.0015	0.187	0.006	grey
	UBP6	0.366	0	0.2	0.0025	grey
	MRPL51	0.331	0.008	0.209	0.011	grey
	COQ5	0.277	0.0025	0.186	0.0035	grey
	GPM2	0.294	0.0005	0.148	0.015	grey
	CBS1	0.363	0.004	0.207	0.0035	grey
	MRP7	0.316	0.008	0.179	0	grey
	QRI5	0.378	0.0055	0.209	0.0005	grey
	PAC10	0.355	0.0005	0.228	0.014	grey
	SPE2	0.254	0.015	0.199	0.002	grey
	RIM9	0.355	0.0065	0.167	0.007	grey
	YPT7	0.356	0	0.226	0.004	grey
	COA3	0.337	0.0015	0.256	0.0015	grey
	HMI1	0.37	0.0043	0.17	0.0142	grey
	STO1	0.307	0.002	0.208	0.0045	grey
	OPI11	0.231	0.0065	0.176	0.0125	grey
	SLI15	0.381	0.0035	0.195	0.0045	grey
	VPS27	0.366	0.007	0.156	0.008	grey
	MNN10	0.282	0.006	0.161	0.0195	grey
	COA2	0.348	0.0059	0.208	0.0056	grey
	PIH1	0.305	0.0054	0.142	0.0164	grey
	ARO1	0.377	0.003	0.158	0.008	grey
	AIM44	0.37	0.0045	0.157	0.008	grey
	RPS21B	0.385	0.0101	0.136	0.0087	grey
	SGF11	0.37	0.0073	0.192	0.005	grey
	YGR125W	0.367	0.0049	0.165	0.0074	grey
	SST2	0.351	0.0106	0.182	0.0149	grey
	YFL013W-A	0.367	0.0074	0.175	0.009	grey
	VID22	0.347	0.012	0.198	0.0207	grey
	VTS1	0.355	0.0097	0.137	0.0033	grey
	MSC1	0.348	0.0133	0.24	0.0172	grey
	TLG2	0.369	0.0088	0.205	0.0147	grey
	SRN2	0.374	0.0008	0.162	0.0094	grey
	TVP18	0.345	0.0065	0.13	0.009	grey
	SKY1	0.305	0.0087	0.189	0.0067	grey
	CAC2	0.353	0.0051	0.136	0.0054	grey
	YNL120C	0.349	0	0.144	0.0015	grey
	RLF2	0.355	0.004	0.117	0.011	grey
	CRD1	0.315	0.0062	0.193	0.0053	grey
	RPN10	0.343	0.0067	0.182	0.0148	grey
	KAP123	0.357	0.006	0.121	0.0106	grey
	IPK1	0.374	0.0111	0.186	0.0087	grey
	EXO1	0.374	0.007	0.19	0.0087	grey
	PRE9	0.325	0.0096	0.198	0.0054	grey
	PUB1	0.345	0.0066	0.237	0.009	grey
	SRO7	0.368	0.0064	0.156	0.0065	grey
	PEX1	0.36	0.0074	0.179	0.0087	grey
	PFK2	0.38	0.0074	0.161	0.0066	grey
	YML010C-B	0.33	0.0041	0.162	0.005	grey
	SSA4	0.366	0.0078	0.13	0.0064	grey
	YBR226C	0.383	0.0055	0.184	0.0095	grey
	SPT8	0.325	0.0094	0.192	0.0133	grey
	RVS161	0.388	0.0045	0.152	0.014	grey
	LSM6	0.325	0.0074	0.164	0.0075	grey
	YKE2	0.354	0.0042	0.165	0.0033	grey
	NUP120	0.294	0.0066	0.202	0.0107	grey
	CGR1	0.371	0.0039	0.131	0.0074	grey
	APQ12	0.31	0.0087	0.177	0.0062	grey
	RPL8A	0.385	0.0087	0.122	0.0126	grey
	MOG1	0.298	0.0043	0.209	0.0043	grey
	SGS1	0.356	0.0086	0.182	0.0142	grey
	THP3	0.297	0.0025	0.185	0.0107	grey
	RPL29	0.36	0.0041	0.156	0.0061	grey
	RMI1	0.338	0.0088	0.235	0.0082	grey
	RDI1	0.38	0.0082	0.17	0.0054	grey
	YBR196C-A	0.338	0.0069	0.135	0.0111	grey
	MMR1	0.311	0.0061	0.3	0.0083	grey
	GTF1	0.366	0.0057	0.119	0.0062	grey
	TOM1	0.313	0.0037	0.175	0.0045	grey
	PEX3	0.316	0.0038	0.157	0.0111	grey
	CBT1	0.36	0.0094	0.209	0.0083	grey
	ARP6	0.357	0.0053	0.176	0.0065	grey
	HOM2	0.356	0.0045	0.151	0.0079	grey
	RPL35B	0.322	0.007	0.15	0.0123	grey
	BUD19	0.229	0.0062	0.16	0.0088	grey
	KTI12	0.332	0.0024	0.181	0.0054	grey
	SLX9	0.329	0.0025	0.136	0.0087	grey
	SWD1	0.341	0.0041	0.151	0.0134	grey
	UBA4	0.32	0.0067	0.166	0.0141	grey
	TEF4	0.321	0.0025	0.178	0.0123	grey
	GIS4	0.369	0.0046	0.21	0.0062	grey
	YGL152C	0.342	0.0029	0.15	0.0041	grey
	NUP188	0.34	0.0099	0.161	0.0082	grey
	BRE2	0.36	0.0024	0.155	0.0071	grey
	NCS2	0.323	0.0136	0.154	0.0091	grey
	BUD27	0.282	0.0031	0.141	0.0086	grey
	IMP1	0.363	0.0051	0.162	0.0063	grey
	NPL6	0.365	0.0065	0.165	0.012	grey
	RPL23A	0.334	0.0021	0.157	0.0064	grey
	DEP1	0.325	0.0017	0.174	0.0008	grey
	THR4	0.364	0.0075	0.158	0.0124	grey
	SNX4	0.388	0.0041	0.164	0.0034	grey
	ATC1	0.36	0.0078	0.161	0.0063	grey
	CDH1	0.316	0.011	0.227	0.005	grey
	SDS3	0.374	0.0136	0.166	0.0033	grey
	COA4	0.34	0.002	0.163	0.0095	grey
	SSD1	0.352	0.0085	0.178	0.0015	grey
	RAD51	0.324	0.0064	0.189	0.0118	grey
	RPS22A	0.376	0.015	0.149	0.0039	grey
	LDB18	0.323	0.0114	0.182	0.0043	grey
	NUT1	0.342	0.0105	0.199	0.009	grey
	SBP1	0.343	0.0131	0.172	0.008	grey
	YPL062W	0.275	0.0157	0.173	0.0037	grey
	CKB1	0.356	0.0105	0.16	0.005	grey
	LYS9	0.364	0.0045	0.181	0.0124	grey
	YFR032C-B	0.365	0.0005	0.148	0.0086	grey
	CYT1	0.348	0.0025	0.208	0	grey
	YLR235C	0.311	0.0015	0.206	0.0115	grey
	RAD50	0.305	0.008	0.21	0.0099	grey
	TOP3	0.348	0.0048	0.175	0.015	grey
	SWI5	0.365	0.0067	0.134	0.0056	grey
	PTK2	0.365	0.0025	0.143	0.0103	grey
	RPL34B	0.305	0.0024	0.165	0.0057	grey
	BEM1	0.321	0.0082	0.212	0.0078	grey
	STE50	0.393	0.0021	0.159	0.0062	grey
	POP2	0.286	0.001	0.213	0.0045	grey
	IES5	0.368	0.0046	0.173	0.005	grey
	BUD28	0.27	0.002	0.132	0.0155	grey
	BRR1	0.352	0.0056	0.117	0.009	grey
	PMA2	0.355	0.0056	0.196	0.0078	grey
	BRP1	0.304	0.0025	0.185	0.0035	grey
	YJL120W	0.366	0.003	0.162	0.0095	grey
	ORM2	0.385	0.0039	0.163	0.0156	grey
	LAT1	0.359	0.0008	0.163	0.0105	grey
	ERG4	0.359	0.0015	0.192	0.01	grey
	CCZ1	0.362	0.0029	0.205	0.0036	grey
	GEM1	0.32	0.0117	0.164	0.0024	grey
	RPA14	0.345	0.0035	0.166	0.0045	grey
	LIP2	0.367	0.0041	0.144	0.0079	grey
	NCS6	0.323	0.0034	0.145	0.0167	grey
	ZRC1	0.382	0.0053	0.154	0.016	grey
	UTH1	0.344	0.002	0.164	0.011	grey
	OPI8	0.348	0.0063	0.133	0.0021	grey
	NKP2	0.35	0.0082	0.18	0.0036	grey
	DFG16	0.366	0.0066	0.194	0.012	grey
	SGF29	0.338	0.0128	0.179	0.0148	grey
	PET122	0.347	0.0111	0.208	0.0133	grey
	YGL072C	0.317	0.008	0.213	0.001	grey
	PEX8	0.313	0.0151	0.202	0.0048	grey
	RPS10B	0.332	0.0125	0.132	0.0062	grey
	YLR402W	0.321	0.003	0.184	0.008	grey
	KAP122	0.345	0.0039	0.162	0.0059	grey
	STB5	0.288	0.0105	0.217	0.0103	grey
	PEX13	0.361	0.0062	0.166	0.0062	grey
	ABF2	0.34	0.0005	0.189	0.0085	grey
	POC4	0.343	0.004	0.179	0.0065	grey
	MON1	0.346	0.002	0.214	0.002	grey
	RPL40B	0.366	0.0099	0.183	0.0009	grey
	MDL2	0.353	0.0091	0.177	0.0065	grey
	NHX1	0.379	0	0.187	0	grey
	GIM3	0.332	0.009	0.23	0.006	grey
	SUR1	0.38	0.0066	0.17	0.0103	grey
	TPM1	0.351	0.0045	0.146	0.0045	grey
	YMR153C-A	0.372	0.0086	0.18	0.0065	grey
	BTS1	0.334	0.0136	0.17	0.0065	grey
	URM1	0.324	0.0049	0.162	0.012	grey
	MRPL1	0.355	0.0071	0.155	0.0106	grey
	YGL149W	0.365	0.0126	0.168	0.0082	grey
	YML102C-A	0.336	0.0097	0.138	0.0028	grey
	SSF1	0.342	0.0113	0.167	0.0131	grey
	NOT3	0.357	0.0074	0.165	0.0019	grey
	YJR087W	0.369	0.0093	0.149	0.0104	grey
	TRM9	0.338	0.0095	0.179	0.0025	grey
	TIF1	0.377	0.009	0.127	0.0107	grey
	DOA1	0.357	0.009	0.171	0.007	grey
	LYS20	0.287	0.0036	0.146	0.0116	grey
	FMC1	0.313	0.0087	0.195	0.0107	grey
	VPS75	0.376	0.0104	0.172	0.013	grey
	RIM20	0.356	0.0075	0.172	0.0026	grey
	MDM38	0.338	0.0101	0.248	0.009	grey
	RPL27B	0.334	0.0067	0.165	0.0054	grey
	RPL9A	0.32	0.0062	0.156	0.0151	grey
	SLK19	0.37	0.004	0.154	0.001	grey
	SCS7	0.373	0.003	0.14	0.0015	grey
	RAD52	0.32	0.0053	0.195	0.0164	grey
	PEP8	0.353	0.0109	0.168	0.0065	grey
	RPL24A	0.334	0.0094	0.158	0.0076	grey
	YNL109W	0.362	0.0041	0.136	0.0097	grey
	HIR2	0.377	0.0065	0.163	0.0054	grey
	YDL180W	0.376	0.004	0.145	0	grey
	PEX5	0.355	0.0078	0.141	0.0161	grey
	PET8	0.377	0.0103	0.181	0.0057	grey
	LCB5	0.365	0.007	0.14	0.0165	grey
	YGL046W	0.367	0.0055	0.185	0.011	grey
	HDA1	0.361	0.001	0.184	0.01	grey
	CTF8	0.362	0.0075	0.166	0.0045	grey
	PIN4	0.373	0.005	0.133	0.0155	grey
	PET54	0.345	0.0105	0.216	0.0085	grey
	YGR039W	0.366	0.0098	0.198	0.0067	grey
	RAM1	0.345	0.0005	0.194	0.006	grey
	SRP40	0.369	0.004	0.157	0.001	grey
	YJL211C	0.375	0.005	0.182	0.0035	grey
	MET22	0.347	0.0045	0.16	0.005	grey
	GUS1	0.352	0.005	0.16	0.0225	grey
	TRS85	0.387	0.0102	0.165	0.0108	grey
	JJJ1	0.376	0.007	0.154	0.0134	grey
	YGR050C	0.359	0.0035	0.176	0.0085	grey
	SEC23	0.357	0.0016	0.167	0.0114	grey
	BMH1	0.392	0.0077	0.158	0.0099	grey
	SCS2	0.378	0.0098	0.173	0.0061	grey
	IFM1	0.349	0.0053	0.226	0.0096	grey
	ELO3	0.339	0.0125	0.166	0.0139	grey
	CYK3	0.359	0.0083	0.16	0.012	grey
	RPL24B	0.367	0.0025	0.174	0.004	grey
	INP1	0.395	0.0078	0.162	0.0058	grey
	IRA2	0.4	0.0065	0.159	0.0085	grey
	EAF7	0.382	0.0068	0.155	0.0028	grey
	STP1	0.362	0.0071	0.147	0.0048	grey
	YGR064W	0.341	0.0075	0.175	0.011	grey
	YLL007C	0.378	0.0045	0.167	0.0136	grey
	YDR442W	0.366	0.0042	0.168	0.0081	grey
	PDA1	0.372	0.0042	0.189	0.0057	grey
	CBF1	0.383	0.0105	0.176	0.0085	grey
	PEX22	0.368	0.0075	0.187	0.0054	grey
	YBL100C	0.352	0.0147	0.241	0.0026	grey
	FIS1	0.364	0.0127	0.182	0.0093	grey
	RPL26B	0.375	0.0065	0.157	0.0118	grey
	YGR122W	0.383	0.0071	0.182	0.0076	grey
	RPS0A	0.343	0.0074	0.179	0.013	grey
	BCS1	0.353	0.0098	0.219	0.0101	grey
	BRE5	0.356	0.0078	0.142	0.0019	grey
	EMI1	0.319	0.0084	0.264	0.0131	grey
	YBR174C	0.311	0.0041	0.164	0.0145	grey
	RPL9B	0.354	0.003	0.182	0.0055	grey
	PAT1	0.385	0.0098	0.158	0.004	grey
	PEX10	0.37	0.0135	0.176	0.012	grey
	PEX15	0.367	0.008	0.206	0.006	grey
	JNM1	0.383	0.0085	0.175	0.0123	grey
	LDB7	0.391	0.001	0.137	0.014	grey
	FPR2	0.385	0.0102	0.156	0.008	grey
	LST4	0.38	0.002	0.159	0.01	grey
	PEX14	0.345	0.0111	0.169	0.0134	grey
	KCH1	0.37	0.0115	0.178	0.0135	grey
	MAM33	0.389	0.0061	0.151	0.0102	grey
	LSM7	0.363	0.006	0.168	0.014	grey
	PHO86	0.325	0.0107	0.182	0.0082	grey
	URA5	0.376	0.0094	0.166	0.0117	grey
	ARO2	0.275	0.0115	0.215	0.02	grey
	IST3	0.308	0.0075	0.178	0.0105	grey
	PUF6	0.359	0.0093	0.177	0.0012	grey
	EAP1	0.283	0.0099	0.262	0.0045	grey
	RPS25A	0.349	0.0139	0.166	0.0143	grey
	VPS35	0.382	0.0133	0.171	0.0058	grey
	PEX2	0.333	0.018	0.234	0.026	grey
	GYP1	0.387	0.01	0.173	0.0095	grey
	OLA1	0.371	0.009	0.171	0.0105	grey
	SWC5	0.373	0.0111	0.169	0.005	grey
	COQ3	0.341	0.004	0.251	0.0045	grey
	SWD3	0.339	0.0118	0.16	0.0168	grey
	COY1	0.372	0.0085	0.188	0.004	grey
	MGA2	0.351	0.013	0.144	0.01	grey
	YCL062W	0.343	0.01	0.2	0.0045	grey
	HAP5	0.359	0.013	0.239	0.0069	grey
	PEX12	0.34	0.0075	0.184	0.0108	grey
	AVL9	0.361	0.007	0.148	0.004	grey
	YJR037W	0.371	0.0116	0.151	0.0113	grey
	SEC66	0.377	0.0103	0.168	0.0101	grey
	CYC2	0.366	0.0119	0.171	0.009	grey
	YMR052C-A	0.382	0.0045	0.175	0.0045	grey
	SEA4	0.366	0.0055	0.154	0.0035	grey
	SKI3	0.358	0.004	0.15	0.0045	grey
	ARP1	0.374	0.0005	0.189	0.0065	grey
	AGE2	0.367	0.004	0.18	0.016	grey
	SLC1	0.377	0.0017	0.193	0.0063	grey
	PEF1	0.373	0.0078	0.157	0.0005	grey
	RPS24B	0.371	0.0046	0.138	0.0128	grey
	PEX32	0.364	0.0045	0.134	0.0068	grey
	VPS72	0.358	0.0059	0.187	0.0103	grey
	BIO4	0.371	0.004	0.173	0.0136	grey
	YLR374C	0.348	0.0082	0.193	0.0094	grey
	RCO1	0.363	0.0014	0.187	0.0128	grey
	UBA3	0.367	0.0045	0.174	0.0099	grey
	GLO3	0.275	0.0038	0.136	0.0042	grey
	OST4	0.351	0.004	0.166	0.0085	grey
	FRA1	0.378	0.0054	0.19	0.0111	grey
	WSS1	0.347	0.005	0.199	0.0091	grey
	OPI1	0.353	0.0054	0.193	0.0167	grey
	SLO1	0.367	0.0057	0.184	0.0111	grey
	RPL38	0.391	0.0024	0.162	0.0095	grey
	PBY1	0.345	0.0041	0.188	0.0049	grey
	BUL1	0.362	0.0034	0.149	0.0118	grey
	MMM1	0.341	0.0005	0.151	0.0098	grey
	MGR2	0.379	0.0034	0.178	0.0057	grey
	CCW12	0.282	0.0038	0.189	0.0132	grey
	CSF1	0.289	0.0094	0.249	0.0107	grey
	RPS22B	0.355	0.0022	0.165	0.0111	grey
	DYN1	0.374	0.0042	0.181	0.005	grey
	NOP6	0.358	0.0012	0.161	0.0082	grey
	RPL4A	0.362	0.0033	0.166	0.0093	grey
	RTT106	0.348	0.0029	0.144	0.0031	grey
	YHM2	0.362	0.005	0.168	0.0075	grey
	ARX1	0.333	0.0069	0.157	0.0062	grey
	URC2	0.35	0.0066	0.173	0.009	grey
	SKI8	0.349	0.0033	0.18	0.0076	grey
	SSO2	0.386	0.0021	0.154	0.005	grey
	FAR11	0.375	0.0026	0.123	0.0047	grey
	ECM8	0.374	0.006	0.168	0.0087	grey
	AAD4	0.39	0.0037	0.171	0.009	grey
	APM1	0.387	0.0041	0.164	0.0099	grey
	FTR1	0.289	0.0099	0.172	0.0106	grey
	YBR100W	0.35	0.0009	0.194	0.0109	grey
	UBP2	0.38	0.0012	0.173	0.0037	grey
	TIM11	0.296	0.0069	0.33	0.0133	grey
	ALT1	0.3	0.0075	0.286	0.0177	grey
	SET2	0.317	0.0073	0.206	0.0134	grey
	YMR031W-A	0.345	0.0057	0.174	0.013	grey
	SWM2	0.349	0.007	0.185	0.0087	grey
	FUS3	0.355	0.003	0.194	0.004	grey
	RAD14	0.373	0.0073	0.163	0.0173	grey
	RTR1	0.325	0.004	0.238	0.0045	grey
	ARL1	0.357	0.0298	0.179	0.022	grey
	PRY3	0.383	0.0025	0.161	0.01	grey
	EGD2	0.339	0.0037	0.28	0.0142	grey
	MRN1	0.341	0.0068	0.182	0.0086	grey
	RPL16A	0.338	0.0045	0.163	0.0025	grey
	RPE1	0.363	0.0073	0.178	0.0113	grey
	YKR051W	0.356	0.0069	0.191	0.0045	grey
	DUN1	0.336	0.0062	0.211	0.0103	grey
	ESC2	0.347	0.0061	0.193	0.0086	grey
	GGA2	0.366	0.0054	0.168	0.0026	grey
	RDS1	0.379	0.0078	0.17	0.0091	grey
	YDR179W-A	0.327	0.0108	0.181	0.0048	grey
	RAV2	0.367	0.009	0.188	0.0147	grey
	VTC1	0.388	0.0097	0.153	0.0098	grey
	YLR264C-A	0.311	0.007	0.166	0.012	grey
	GMC2	0.293	0.0016	0.161	0.0054	grey
	YDR203W	0.34	0.0064	0.179	0.0135	grey
	SHU2	0.345	0.0074	0.143	0.007	grey
	RPL26A	0.371	0.0065	0.165	0.0039	grey
	VPS71	0.354	0.0074	0.177	0.0049	grey
	ARO7	0.352	0.0051	0.179	0.0068	grey
	YOR008C-A	0.371	0.006	0.184	0.0035	grey
	HBS1	0.351	0.0074	0.131	0.0085	grey
	DOT5	0.367	0.011	0.191	0.014	grey
	SIF2	0.319	0.0108	0.201	0.0158	grey
	YLR363W-A	0.342	0.0151	0.185	0.0139	grey
	MIC19	0.326	0.0041	0.221	0.0141	grey
	CYT2	0.352	0.0015	0.188	0.0095	grey
	SPO7	0.373	0.0095	0.157	0.0055	grey
	VPS55	0.354	0.005	0.202	0.01	grey
	POL32	0.361	0.0099	0.151	0.0026	grey
	RPL43B	0.277	0.0091	0.177	0.0107	grey
	ERF2	0.345	0.0048	0.171	0.0062	grey
	REC104	0.357	0.0099	0.178	0.0147	grey
	FRE6	0.372	0.0104	0.158	0.0117	grey
	TMA19	0.402	0.0093	0.142	0.0073	grey
	TKL1	0.394	0.0037	0.158	0.0054	grey
	NST1	0.38	0.0047	0.147	0.0073	grey
	SIR1	0.388	0.0021	0.149	0.0054	grey
	WHI5	0.372	0.0043	0.211	0.0049	grey
	ATG1	0.398	0.0049	0.135	0.005	grey
	BFR1	0.39	0.0088	0.132	0.0021	grey
	RAD2	0.388	0.0008	0.148	0.0045	grey
	RPS14A	0.366	0.0037	0.138	0.0025	grey
	PPR1	0.393	0.0061	0.148	0.0079	grey
	FOX2	0.379	0.0022	0.179	0.0048	grey
	YLR111W	0.334	0.008	0.16	0.0164	grey
	VPS30	0.405	0.0088	0.156	0.0151	grey
	PMS1	0.375	0.0021	0.166	0.0022	grey
	QRI7	0.342	0.005	0.129	0.0093	grey
	MKC7	0.374	0.0022	0.161	0.0081	grey
	HOG1	0.361	0.0054	0.151	0.0149	grey
	FUN30	0.398	0.0031	0.155	0.0062	grey
	AAT1	0.4	0.0012	0.148	0.0074	grey
	YDR426C	0.377	0.0009	0.184	0.0078	grey
	BDF1	0.351	0.0108	0.163	0.0148	grey
	SWC3	0.38	0.0084	0.165	0.006	grey
	SUS1	0.354	0.0082	0.224	0.0143	grey
	SER2	0.132	0.0083	0.294	0.0338	grey
	MTO1	0.406	0.001	0.168	0.0005	grey
	IES6	0.336	0.0085	0.172	0.0135	grey
	RCN2	0.378	0.0048	0.173	0.0096	grey
	YLR269C	0.404	0.0054	0.159	0.0034	grey
	ELO2	0.414	0.0041	0.158	0.0102	grey
	HOS4	0.344	0.0005	0.156	0.004	grey
	ELF1	0.399	0.0029	0.143	0.0025	grey
	YHR050W-A	0.396	0.0042	0.167	0.0169	grey
	YPL261C	0.384	0.0012	0.177	0.0051	grey
	FAR7	0.411	0.0014	0.159	0.0099	grey
	ROM2	0.397	0.0028	0.164	0.0049	grey
	RPL8B	0.362	0.0037	0.143	0.007	grey
	EDE1	0.361	0.0035	0.156	0	grey
	SNC2	0.353	0.0038	0.169	0.0056	grey
	OMS1	0.383	0.0068	0.171	0.0116	grey
	LSM1	0.379	0.0012	0.155	0.0058	grey
	URA7	0.371	0.0057	0.165	0.012	grey
	NPR3	0.375	0.0008	0.166	0.0012	grey
	TFA2	0.356	0.0026	0.172	0.0062	grey
	HHF1	0.379	0.0031	0.142	0.0033	grey
	KIN4	0.352	0.0046	0.168	0.0179	grey
	LDB19	0.343	0.0045	0.178	0.0035	grey
	YOR376W-A	0.395	0.0029	0.161	0.0083	grey
	HTA1	0.348	0.0045	0.146	0.0037	grey
	BUD14	0.37	0.0045	0.138	0.0145	grey
	YDL157C	0.379	0.0048	0.154	0.0091	grey
	MAD3	0.391	0.0029	0.154	0.0074	grey
	YMR193C-A	0.367	0.0021	0.145	0.0172	grey
	YKL075C	0.364	0.0029	0.149	0.0037	grey
	APL2	0.381	0.0045	0.175	0.0028	grey
	EUG1	0.404	0.0056	0.154	0.0037	grey
	RTC6	0.335	0.0012	0.204	0.0036	grey
	GET1	0.33	0.0012	0.165	0.0082	grey
	BLM10	0.365	0.0008	0.213	0.0132	grey
	SEM1	0.353	0.0053	0.162	0.0058	grey
	PDB1	0.388	0.0034	0.146	0.0095	grey
	LYS12	0.378	0.0033	0.173	0.0104	grey
	YLR366W	0.382	0.0033	0.158	0.0084	grey
	SHE1	0.392	0	0.163	0.0024	grey
	DCC1	0.355	0.0071	0.19	0.0163	grey
	SAC7	0.351	0.0054	0.187	0.0073	grey
	ECM7	0.358	0.0086	0.2	0.0073	grey
	EFT2	0.337	0.0019	0.151	0.0101	grey
	HXK2	0.389	0.0041	0.15	0.0074	grey
	SIR2	0.39	0.0025	0.178	0.0033	grey
	RAD55	0.367	0.0015	0.17	0.001	grey
	YAF9	0.376	0.0048	0.182	0.0059	grey
	SNF3	0.399	0.0019	0.158	0.005	grey
	CWH41	0.382	0.001	0.15	0.0065	grey
	MBF1	0.383	0.0059	0.17	0.0087	grey
	SER1	0.143	0.004	0.288	0.0252	grey
	SAT4	0.38	0.0058	0.169	0.0059	grey
	IRS4	0.386	0.0074	0.174	0.0026	grey
	PAM17	0.378	0.005	0.186	0.0108	grey
	WHI2	0.35	0.0024	0.166	0.0033	grey
	MUB1	0.391	0.0021	0.136	0.0063	grey
	ITC1	0.403	0.0005	0.131	0.0065	grey
	SNX41	0.384	0.0085	0.199	0.0127	grey
	APJ1	0.404	0.0073	0.137	0.0046	grey
	TPK1	0.389	0.0065	0.167	0.0083	grey
	RAD57	0.367	0.0083	0.166	0.0116	grey
	MSS1	0.375	0.013	0.182	0.014	grey
	FPS1	0.332	0.0096	0.199	0.0062	grey
	PSY1	0.36	0.0195	0.16	0.0161	grey
	FRA2	0.326	0.011	0.191	0.0017	grey
	YNR029C	0.388	0.0107	0.143	0.0031	grey
	TDA5	0.379	0.0118	0.184	0.0051	grey
	MSI1	0.367	0.0139	0.156	0.0097	grey
	RAD18	0.379	0.014	0.176	0.0049	grey
	VPS70	0.383	0.018	0.146	0.0045	grey
	RIM15	0.373	0.0105	0.145	0.0025	grey
	YDR455C	0.378	0.0125	0.144	0.0005	grey
	PEX4	0.366	0.004	0.175	0.005	grey
	RAD54	0.362	0.009	0.192	0.0116	grey
	BIM1	0.306	0.0036	0.269	0.0177	grey
	LEO1	0.349	0.0058	0.182	0.0153	grey
	MSH2	0.378	0.0046	0.194	0.0132	grey
	UBR2	0.401	0.0033	0.149	0.007	grey
	SAP1	0.395	0.0078	0.17	0.0046	grey
	VPS13	0.396	0.0043	0.162	0.0098	grey
	PHO84	0.395	0.007	0.172	0.0074	grey
	STB3	0.384	0.0035	0.17	0.0015	grey
	YLR416C	0.4	0.001	0.154	0.001	grey
	UBP15	0.369	0.0067	0.18	0.0143	grey
	BEM2	0.351	0.0077	0.188	0.0078	grey
	UFO1	0.354	0.0066	0.143	0.0061	grey
	PIB2	0.391	0.0041	0.136	0.0029	grey
	SIS2	0.35	0.0009	0.166	0.0054	grey
	TSA1	0.363	0.0012	0.167	0.005	grey
	ARO8	0.387	0.0101	0.168	0.0017	grey
	YOL035C	0.379	0.0029	0.167	0.0117	grey
	MIC27	0.361	0.0065	0.218	0.0095	grey
	LTE1	0.38	0.002	0.171	0.006	grey
	TRS65	0.361	0.0062	0.198	0.0069	grey
	CHS5	0.396	0.003	0.175	0.0105	grey
	UBX2	0.369	0.0029	0.175	0.0105	grey
	SMA2	0.4	0.0064	0.176	0.005	grey
	LIA1	0.368	0.0073	0.179	0.0094	grey
	OTU2	0.394	0.007	0.168	0.0056	grey
	PAC1	0.401	0.0022	0.168	0.0057	grey
	GCN1	0.375	0.0057	0.173	0.0069	grey
	SAM1	0.363	0.0035	0.183	0.006	grey
	YOR277C	0.399	0.0025	0.158	0.011	grey
	RXT3	0.396	0.0029	0.158	0.0073	grey
	PMC1	0.389	0.0035	0.167	0.001	grey
	IRC25	0.367	0.0051	0.198	0.0042	grey
	POG1	0.386	0.0034	0.164	0.0036	grey
	YLR422W	0.392	0.0009	0.168	0.0127	grey
	YNL067W-B	0.386	0.0017	0.162	0.0019	grey
	MSN5	0.406	0.0048	0.162	0.0017	grey
	RTT101	0.368	0.0025	0.185	0.0087	grey
	ENT4	0.364	0.0076	0.156	0.0097	grey
	AGP1	0.389	0.0066	0.166	0.0169	grey
	BCH2	0.352	0.001	0.128	0.012	grey
	YBR225W	0.402	0.0045	0.172	0.0005	grey
	PPQ1	0.371	0.003	0.169	0.0025	grey
	SYO1	0.336	0.0086	0.168	0.008	grey
	YGR237C	0.338	0.0051	0.168	0.0103	grey
	COQ10	0.367	0.0058	0.208	0.0135	grey
	RAD5	0.366	0.0067	0.19	0.0088	grey
	YBR292C	0.371	0.0051	0.19	0.0005	grey
	BER1	0.379	0.0069	0.172	0.0059	grey
	MSH5	0.39	0.001	0.192	0.0095	grey
	NEM1	0.356	0.0075	0.209	0	grey
	TMA22	0.375	0.003	0.165	0.0065	grey
	SAP155	0.393	0.0014	0.142	0.0095	grey
	GCN20	0.366	0.0035	0.189	0.0075	grey
	MUD2	0.342	0	0.181	0.0175	grey
	AIM29	0.342	0.0094	0.178	0.0045	grey
	TMA20	0.363	0.0075	0.177	0.0082	grey
	YOL050C	0.334	0.0022	0.157	0.0172	grey
	EAF6	0.378	0.0057	0.191	0.0017	grey
	DUF1	0.367	0.0057	0.156	0.0025	grey
	SHR5	0.374	0.01	0.166	0.0111	grey
	GDI1	0.402	0.0061	0.166	0.0085	grey
	ICP55	0.398	0.0047	0.169	0.005	grey
	YLR290C	0.363	0.0064	0.174	0.0172	grey
	UFD2	0.385	0.0015	0.21	0.0005	grey
	YBP1	0.399	0.0055	0.17	0.0025	grey
	YAR029W	0.36	0.017	0.202	0.0021	grey
	ATG8	0.381	0.0164	0.18	0.0056	grey
	CMC1	0.386	0.0151	0.182	0.0123	grey
	MTC3	0.385	0.0116	0.159	0.0071	grey
	YMR147W	0.396	0.0137	0.183	0.0127	grey
	VHS3	0.387	0.001	0.19	0.002	grey
	EST1	0.385	0.0127	0.17	0.009	grey
	SWM1	0.389	0.0086	0.169	0.0037	grey
	ADE3	0.392	0.0159	0.18	0.0037	grey
	ACO1	0.384	0.0127	0.193	0.0059	grey
	MDJ1	0.405	0.0087	0.189	0.0045	grey
	EST2	0.35	0.0077	0.174	0.012	grey
	MIP1	0.378	0.0132	0.164	0.0043	grey
	TIF4631	0.37	0.009	0.162	0.0128	grey
	SLM5	0.297	0.0026	0.209	0.0147	grey
	RPL37B	0.344	0.0052	0.165	0.0207	grey
	RPS24A	0.324	0.0017	0.182	0.005	grey
	SNF8	0.373	0.0125	0.182	0.0202	grey
	MSY1	0.293	0.0056	0.18	0.0057	grey
	RPL20A	0.299	0.0016	0.169	0.02	grey
	FYV7	0.314	0.0051	0.156	0.0086	grey
	VPS3	0.282	0.0056	0.225	0.0113	grey
	MRPS17	0.396	0.0047	0.154	0.0045	grey
	ICE2	0.358	0.0041	0.217	0.0131	grey
	HMO1	0.257	0.0045	0.183	0.0138	grey
	RPL39	0.4	0.0047	0.175	0.0033	grey
	YAR1	0.371	0.0082	0.168	0.0127	grey
	PTC1	0.378	0.0065	0.212	0.007	grey
	MSE1	0.353	0.0033	0.17	0.0097	grey
	MRPL11	0.364	0.0066	0.166	0.0119	grey
	MRP1	0.357	0.006	0.161	0.0095	grey
	ARP8	0.347	0.0085	0.186	0.0139	grey
	NAM2	0.325	0.0037	0.165	0.0045	grey
	MSK1	0.362	0.0017	0.16	0.009	grey
	ARV1	0.351	0.0036	0.154	0.0079	grey
	IRC19	0.38	0.0061	0.145	0.0139	grey
	RIC1	0.212	0.0056	0.304	0.0253	grey
	MRPL15	0.351	0.0059	0.167	0.0062	grey
	GND1	0.18	0.0063	0.348	0.0257	grey
	YEL045C	0.186	0.0079	0.279	0.0081	grey
	YDR115W	0.296	0.0056	0.19	0.005	grey
	YGL024W	0.394	0.0062	0.169	0.0036	grey
	RMD9	0.372	0.0033	0.142	0.0078	grey
	PEP12	0.276	0.003	0.246	0.0205	grey
	NUP170	0.371	0.0012	0.193	0.0031	grey
	DAL81	0.363	0.0033	0.175	0.0065	grey
	VPS65	0.31	0.0056	0.177	0.0146	grey
	PIM1	0.346	0.0029	0.145	0.0103	grey
	OST3	0.362	0.017	0.176	0.01	grey
	PTH1	0.392	0.0096	0.169	0.007	grey
	ATS1	0.364	0.0049	0.195	0.012	grey
	SEE1	0.38	0.0082	0.167	0.0031	grey
	YLL020C	0.399	0.0068	0.153	0.0026	grey
	YPR153W	0.395	0.0053	0.164	0.009	grey
	MLH1	0.4	0.0087	0.135	0.01	grey
	EST3	0.378	0.0025	0.154	0.0124	grey
	NGR1	0.408	0.0022	0.17	0.0073	grey
	YDR290W	0.366	0.0069	0.162	0.0163	grey
	FCY22	0.399	0.003	0.183	0.001	grey
	RPL36A	0.36	0.0079	0.159	0.0124	grey
	VAC17	0.387	0.0008	0.165	0.0088	grey
	CIN8	0.381	0.0097	0.139	0.0135	grey
	YLR202C	0.37	0.0082	0.201	0.0067	grey
	PEX19	0.38	0.0069	0.181	0.011	grey
	BIK1	0.37	0.0074	0.182	0.0078	grey
	APT2	0.391	0.0048	0.169	0.0105	grey
	NIF3	0.411	0.0093	0.146	0.0014	grey
	YDL094C	0.38	0.0058	0.159	0.0066	grey
	ALD6	0.278	0.0152	0.218	0.0209	grey
	EGD1	0.371	0.0111	0.189	0.0024	grey
	RIM11	0.377	0.0116	0.159	0.007	grey
	INP2	0.376	0.0033	0.179	0.013	grey
	GCS1	0.371	0.0045	0.166	0.0071	grey
	STM1	0.375	0.0062	0.188	0.0059	grey
	GLC8	0.354	0.0064	0.179	0.0076	grey
	YDR509W	0.393	0.016	0.163	0.0189	grey
	YAR044W	0.394	0.0033	0.171	0.0037	grey
	VPS62	0.358	0.007	0.201	0.002	grey
	SAP30	0.349	0.0099	0.171	0.0086	grey
	DEG1	0.323	0.01	0.163	0.0035	grey
	YMR166C	0.366	0.0062	0.185	0.0126	grey
	CDC10	0.394	0.0111	0.142	0.0145	grey
	SPT2	0.374	0.0055	0.176	0.011	grey
	YDL119C	0.335	0.0074	0.158	0.0075	grey
	OCA5	0.378	0.0092	0.168	0.0176	grey
	ATG13	0.371	0.012	0.171	0.0115	grey
	PEP1	0.355	0.0079	0.177	0.0167	grey
	VPS34	0.364	0.0069	0.201	0.0125	grey
	SKI2	0.339	0.012	0.178	0.001	grey
	YDL186W	0.382	0.0185	0.185	0.008	grey
	PEP5	0.357	0.0085	0.186	0.003	grey
	MRPL37	0.357	0.0025	0.163	0.0065	grey
	RPL2B	0.364	0.0005	0.158	0.007	grey
	AKR1	0.363	0.005	0.172	0.0045	grey
	RRP6	0.326	0.0065	0.186	0.002	grey
	MRP10	0.366	0.012	0.172	0	grey
	SHP1	0.304	0.0165	0.22	0.001	grey
	RPL43A	0.259	0.007	0.269	0.013	grey
	VAN1	0.373	0.0055	0.166	0	grey
	PRO2	0.319	0.0045	0.213	0.0035	grey
	RAI1	0.278	0.024	0.172	0.033	grey
	RSM23	0.358	0.016	0.175	0.0175	grey
	RPS9B	0.271	0.0225	0.19	0.023	grey
	RPS27B	0.27	0.0175	0.157	0.0215	grey
	RPB4	0.385	0.0055	0.158	0.0065	grey
	AAT2	0.265	0.0165	0.185	0	grey
	MRPS8	0.304	0.0145	0.262	0.017	grey
	RPL14A	0.292	0.0085	0.126	0.0155	grey
	MRP20	0.356	0.011	0.159	0.006	grey
	YGL188C-A	0.308	0.0165	0.171	0.014	grey
	RTG3	0.191	0.006	0.301	0.0116	grey
	YVH1	0.376	0.011	0.179	0.0014	grey
	MRPS28	0.365	0.0104	0.149	0.0087	grey
	ADK1	0.331	0.017	0.165	0.0025	grey
	YGL007C-A	0.352	0.0049	0.198	0.0136	grey
	RPS0B	0.281	0.0189	0.164	0.0172	grey
	THP1	0.251	0.015	0.253	0.001	grey
	EOS1	0.271	0.0062	0.232	0.0225	grey
	GEP4	0.295	0.0035	0.342	0.006	grey
	MNN9	0.35	0.0143	0.2	0.0207	grey
	ISM1	0.358	0.0062	0.178	0.0116	grey
	ARP5	0.327	0.0118	0.188	0.0109	grey
	CYS4	0.138	0.0015	0.331	0.0295	grey
	SNF7	0.347	0.016	0.194	0.0222	grey
	RPL42B	0.313	0.0146	0.171	0.0126	grey
	MRP21	0.355	0.0099	0.147	0.0143	grey
	MGM1	0.331	0.009	0.162	0.015	grey
	RPL22A	0.242	0.0185	0.197	0.0315	grey
	BUD30	0.282	0.0083	0.198	0.0161	grey
	REF2	0.367	0.003	0.191	0.0045	grey
	MSR1	0.359	0.0122	0.167	0.0056	grey
	YGR272C	0.236	0.005	0.208	0.021	grey
	GRR1	0.389	0.0052	0.168	0.008	grey
	SLS1	0.309	0.0073	0.195	0.0066	grey
	BRO1	0.363	0.0105	0.183	0.0175	grey
	SIC1	0.306	0.0068	0.262	0.0059	grey
	RPS10A	0.285	0.0181	0.204	0.0136	grey
	SLX5	0.373	0.0049	0.149	0.009	grey
	MSS116	0.359	0.0088	0.139	0.007	grey
	ACO2	0.374	0.005	0.186	0.004	grey
	VPS28	0.361	0.0075	0.165	0.002	grey
	ADA2	0.263	0.0095	0.2	0.0036	grey
	ADH3	0.304	0.0069	0.197	0.0074	grey
	MRP17	0.358	0.0083	0.158	0.0201	grey
	MRM1	0.359	0.0055	0.153	0.011	grey
	YGL218W	0.377	0.0054	0.183	0.0088	grey
	RNR1	0.236	0.0103	0.205	0.0103	grey
	HCR1	0.27	0.0091	0.188	0.0139	grey
	VMA7	0.175	0.009	0.324	0.0195	grey
	CYC3	0.357	0.005	0.184	0.004	grey
	AIM10	0.202	0.0005	0.273	0.011	grey
	PDX3	0.264	0.0185	0.225	0.0213	grey
	DSS1	0.365	0.0121	0.165	0.0111	grey
	VPS54	0.341	0.0129	0.181	0.0132	grey
	TIF4632	0.355	0.0196	0.173	0.0133	grey
	UME6	0.341	0.012	0.193	0.0115	grey
	SWS2	0.35	0.01	0.177	0.0165	grey
	SFP1	0.203	0.0168	0.273	0.023	grey
	OCT1	0.347	0.0115	0.165	0.0166	grey
	RRG1	0.327	0.012	0.161	0.0105	grey
	GRX5	0.195	0.0147	0.226	0.0191	grey
	RPS1B	0.369	0.0145	0.163	0.009	grey
	SAC6	0.363	0.008	0.214	0.009	grey
	SIT4	0.191	0.0093	0.295	0.0182	grey
	VPS33	0.355	0.0201	0.169	0.0271	grey
	MSD1	0.356	0.009	0.154	0.0065	grey
	MEF2	0.333	0.0132	0.207	0.0076	grey
	GAL11	0.355	0.0115	0.175	0.0225	grey
	MOT2	0.202	0.009	0.266	0.018	grey
	IMG1	0.364	0.0173	0.151	0.0184	grey
	VPS20	0.351	0.012	0.165	0.0115	grey
	CTR9	0.38	0.0064	0.183	0.0095	grey
	TUF1	0.344	0.0122	0.148	0.0159	grey
	MRPL40	0.351	0.0067	0.152	0.0067	grey
	MRPS16	0.321	0.0118	0.16	0.0135	grey
	RSM24	0.352	0.0135	0.152	0.0185	grey
	OPI9	0.331	0.012	0.182	0.013	grey
	RSM25	0.384	0.0108	0.125	0.0071	grey
	MRPL32	0.342	0.0109	0.167	0.0192	grey
	MRPL35	0.355	0.0086	0.137	0.018	grey
	YGR219W	0.331	0.0094	0.159	0.0145	grey
	TRM7	0.363	0.0049	0.188	0.0067	grey
	DIA4	0.359	0.0012	0.154	0.0163	grey
	NGG1	0.255	0.0079	0.19	0.0151	grey
	PFK1	0.353	0.0016	0.149	0.0128	grey
	BUD16	0.3	0.0118	0.193	0.0182	grey
	BUD31	0.306	0.0034	0.159	0.0052	grey
	SOD1	0.37	0.004	0.179	0.0035	grey
	RPS8A	0.262	0.01	0.213	0.0157	grey
	HER2	0.355	0.0065	0.154	0.0092	grey
	MRPL8	0.364	0.0025	0.137	0.013	grey
	MRP4	0.352	0.0034	0.164	0.0133	grey
	MHR1	0.344	0.0005	0.186	0.009	grey
	MSM1	0.343	0.0029	0.164	0.0104	grey
	MDM31	0.359	0.0053	0.196	0.0054	grey
	EAF1	0.34	0.0065	0.176	0.0081	grey
	ARD1	0.329	0.0052	0.205	0.0038	grey
	CSG2	0.377	0.0052	0.16	0.0118	grey
	RSM27	0.33	0.0047	0.18	0.0047	grey
	MRPS35	0.361	0.0035	0.166	0.013	grey
	RIM1	0.241	0.0043	0.221	0.0096	grey
	PRO1	0.314	0.0107	0.199	0.0037	grey
	ILV1	0.36	0.0026	0.175	0.0102	grey
	ZUO1	0.287	0.009	0.181	0.0107	grey
	PET112	0.348	0.0065	0.168	0.0141	grey
	TCO89	0.371	0.0039	0.157	0.0053	grey
	SNF1	0.394	0.0067	0.151	0.0097	grey
	RPP2B	0.275	0.0036	0.171	0.0102	grey
	RRF1	0.386	0.0078	0.176	0.0068	grey
	POS5	0.315	0.009	0.196	0.0022	grey
	LOC1	0.251	0.0054	0.215	0.0071	grey
	MRPL16	0.306	0.0065	0.195	0.004	grey
	MSF1	0.354	0.0085	0.192	0.005	grey
	MRPL20	0.366	0.012	0.157	0.002	grey
	MTG1	0.294	0.0153	0.18	0.0208	grey
	MRH4	0.362	0.0045	0.142	0.011	grey
	CBC2	0.404	0.0085	0.143	0.0098	grey
	VPS63	0.348	0.0035	0.142	0.0115	grey
	SNT309	0.279	0.0043	0.195	0.0161	grey
	NEW1	0.386	0.0085	0.18	0	grey
	LRP1	0.325	0.0024	0.16	0.011	grey
	ERG28	0.365	0.0035	0.197	0.0145	grey
	MTQ2	0.362	0.0085	0.188	0.0015	grey
	RSC2	0.346	0.009	0.211	0.003	grey
	VMA2	0.349	0.0108	0.175	0.0079	grey
	MRPL36	0.313	0.0082	0.161	0.0102	grey
	MRPS12	0.337	0.0175	0.182	0.0185	grey
	XRN1	0.309	0.0033	0.176	0.0173	grey
	SPT21	0.296	0.0051	0.161	0.0042	grey
	RPL23B	0.378	0.0113	0.213	0.0121	grey
	GEP5	0.33	0.0024	0.169	0.0108	grey
	ARG7	0.373	0.0125	0.171	0.0055	grey
	ARG82	0.367	0.007	0.199	0.004	grey
	MET7	0.302	0.0019	0.185	0.0068	grey
	MST1	0.363	0.006	0.146	0.006	grey
	VPS25	0.348	0.011	0.192	0.0105	grey
	ILM1	0.293	0.0042	0.233	0.01	grey
	MRPL33	0.354	0.0038	0.163	0.0058	grey
	ARC1	0.299	0.0074	0.174	0.0156	grey
	CDC55	0.387	0.0079	0.183	0.0071	grey
	HFI1	0.384	0.0103	0.175	0.0083	grey
	SSQ1	0.239	0.0113	0.205	0.0122	grey
	ARG8	0.372	0.013	0.193	0.0135	grey
	MEF1	0.3	0.0115	0.193	0.0031	grey
	RRG8	0.361	0.0136	0.153	0.0051	grey
	MSW1	0.343	0.0112	0.17	0.0077	grey
	VPS16	0.201	0.001	0.334	0.0165	grey
	NAT1	0.352	0.0123	0.156	0.0128	grey
	RPB9	0.27	0.0124	0.166	0.0126	grey
	PET111	0.359	0.0198	0.208	0.0123	grey
	ZRT1	0.308	0.0069	0.224	0.02	grey
	RPS28B	0.3	0.0015	0.181	0.0095	grey
	CIK1	0.336	0.0135	0.255	0.0065	grey
	HEL2	0.355	0.003	0.227	0.0005	grey
	RPS7B	0.359	0.0025	0.208	0.0055	grey
	CKB2	0.308	0.0025	0.222	0.007	grey
	HOM3	0.376	0.0094	0.175	0.0021	grey
	NPL3	0.25	0.006	0.267	0.0125	grey
	RVS167	0.346	0.003	0.228	0.0125	grey
	MDM12	0.29	0.011	0.288	0.0106	grey
	MRPL49	0.344	0.0061	0.182	0.0141	grey
	RPS16A	0.299	0.0087	0.193	0.0086	grey
	DOA4	0.351	0.019	0.209	0.0045	grey
	NUP84	0.29	0.0096	0.207	0.008	grey
	TRP4	0.374	0.0091	0.204	0.0049	grey
	MTF1	0.328	0.0025	0.183	0.0015	grey
	RPS7A	0.257	0.0045	0.201	0.0261	grey
	BUD21	0.272	0.006	0.21	0.0065	grey
	YMR242W-A	0.304	0.0024	0.191	0.0276	grey
	MGM101	0.34	0.0045	0.196	0.0075	grey
	SAC1	0.314	0.0134	0.144	0.0068	grey
	SSE1	0.283	0.0025	0.157	0.0075	grey
	RRG7	0.353	0.0144	0.191	0.0173	grey
	MRPL28	0.404	0.0008	0.148	0.0148	grey
	SNF5	0.207	0.025	0.303	0.0315	grey
	MSL1	0.401	0.0122	0.16	0.0123	grey
	RPS23B	0.376	0.0095	0.174	0.0055	grey
	MRPL23	0.316	0	0.141	0.005	grey
	SPT4	0.179	0.002	0.349	0.001	grey
	KRE28	0.252	0.012	0.268	0.0122	grey
	RPS18A	0.318	0.0073	0.148	0.0102	grey
	ERI1	0.387	0.013	0.176	0.006	grey
	RSM18	0.369	0.0099	0.156	0.0172	grey
	RAD4	0.39	0.0025	0.17	0.019	grey
	YML090W	0.343	0.0098	0.207	0.0081	grey
	PAF1	0.389	0.0085	0.15	0.011	grey
	MRPL7	0.333	0	0.204	0.012	grey
	MRPL6	0.358	0.0024	0.144	0.0193	grey
	MRF1	0.363	0.0065	0.143	0.0025	grey
	SOV1	0.349	0.0075	0.15	0.0015	grey
	MET18	0.301	0.009	0.145	0.0105	grey
	TMA23	0.383	0.013	0.155	0.0145	grey
	CDC50	0.33	0.0062	0.179	0.0113	grey
	RGP1	0.38	0.0094	0.182	0.0053	grey
	CCM1	0.346	0.0035	0.208	0.0005	grey
	ZAP1	0.3	0.0062	0.242	0.0119	grey
	MRP2	0.389	0.0096	0.191	0.0156	grey
	ADO1	0.309	0.0029	0.172	0.0151	grey
	MRPL4	0.355	0.012	0.179	0.013	grey
	UGO1	0.204	0.007	0.27	0.0162	grey
	NAT3	0.279	0.0045	0.183	0.0211	grey
	RSM19	0.332	0.0024	0.182	0.0153	grey
	VPH1	0.356	0.0057	0.192	0.0045	grey
	RPS11A	0.351	0.0037	0.172	0.0108	grey
	YIL060W	0.372	0.0099	0.17	0.0087	grey
	PEP7	0.257	0.007	0.216	0	grey
	MRPL13	0.354	0.0035	0.229	0.0005	grey
	LEA1	0.359	0.0075	0.21	0	grey
	SCO1	0.32	0.002	0.23	0	grey
	RSM7	0.26	0.0009	0.23	0.0136	grey
	PMP3	0.388	0.0153	0.185	0.0094	grey
	UPS1	0.343	0.0037	0.21	0.0109	grey
	SSZ1	0.278	0.017	0.217	0.0205	grey
	MRPL9	0.324	0.0005	0.203	0.0105	grey
	RSM22	0.301	0.0045	0.211	0.025	grey
	MRPL25	0.283	0.0037	0.228	0.0105	grey
	VPS41	0.29	0.0059	0.236	0.0111	grey
	HPM1	0.331	0.002	0.205	0.014	grey
	AMF1	0.344	0.0074	0.212	0.0107	grey
	HAP4	0.34	0.0082	0.223	0.0054	grey
	MRPS5	0.374	0.003	0.214	0.0115	grey
	RPP1A	0.321	0.018	0.178	0.01	grey
	ERG2	0.378	0.001	0.159	0.0055	grey
	PAP2	0.376	0.0005	0.163	0.0025	grey
	VPS8	0.364	0.002	0.15	0.005	grey
	MDM10	0.221	0.0085	0.297	0.009	grey
	RPL19A	0.328	0.0046	0.147	0.006	grey
	PHO88	0.342	0.006	0.183	0.001	grey
	MRPS9	0.376	0.006	0.178	0.0105	grey
	SLM6	0.253	0.0025	0.167	0.0025	grey
	STP22	0.359	0.009	0.211	0.0125	grey
	DHH1	0.354	0.0063	0.143	0.0073	grey
	RPL35A	0.203	0.0078	0.268	0.0059	grey
	KCS1	0.298	0.0025	0.182	0.0012	grey
	TPS2	0.361	0.0071	0.171	0.0085	grey
	CBS2	0.35	0.013	0.21	0.0065	grey
	RPL12B	0.351	0.0045	0.14	0.0015	grey
	GCN4	0.375	0.0054	0.181	0.0016	grey
	PET117	0.354	0.0106	0.213	0.0172	grey
	SLX8	0.356	0.0049	0.167	0.0111	grey
	RPL1B	0.403	0.0039	0.142	0.0043	grey
	ELP2	0.32	0.008	0.195	0.0108	grey
	RPL40A	0.357	0.0071	0.145	0.0009	grey
	ARG2	0.372	0.0075	0.152	0.005	grey
	AIM23	0.385	0.005	0.171	0.0005	grey
	YKL069W	0.359	0.0005	0.185	0.007	grey
	MMS22	0.289	0.0075	0.238	0.0065	grey
	RPL6B	0.322	0.0065	0.15	0.0045	grey
	VPS9	0.324	0.0015	0.196	0.007	grey
	YTA12	0.335	0.0069	0.15	0.0059	grey
	PKR1	0.314	0.0094	0.156	0.0128	grey
	RPL13B	0.245	0.0088	0.244	0.0162	grey
	AEP2	0.348	0.0025	0.182	0.006	grey
	ELP6	0.287	0.0055	0.21	0.0045	grey
	VAC7	0.369	0.0095	0.205	0.0015	grey
	SRV2	0.4	0.0068	0.128	0.0059	grey
	THO2	0.336	0.0085	0.17	0.01	grey
	YNL170W	0.249	0.0109	0.171	0.0073	grey
	RTG1	0.171	0.0057	0.279	0.0084	grey
	MDM20	0.252	0.0155	0.231	0.0015	grey
	RPS19A	0.331	0.0103	0.145	0.0057	grey
	VPS5	0.335	0.0177	0.242	0.022	grey
	YPL205C	0.336	0.0115	0.194	0.004	grey
	COQ4	0.345	0.0025	0.21	0.0055	grey
	RIM8	0.352	0.003	0.203	0.006	grey
	RPL17B	0.369	0.0113	0.135	0.0086	grey
	SPE1	0.134	0.003	0.339	0.026	grey
	GSH2	0.37	0.0137	0.161	0.012	grey
	ATG20	0.382	0.001	0.173	0.005	grey
	PIF1	0.407	0.0005	0.172	0.002	grey
	NOP12	0.314	0.0075	0.174	0.009	grey
	YGL042C	0.39	0.002	0.189	0.0005	grey
	RPS26B	0.386	0.0005	0.174	0.005	grey
	RPS17B	0.372	0.0206	0.155	0.0131	grey
	YBR224W	0.394	0.018	0.154	0.0105	grey
	PET123	0.372	0.0075	0.182	0.0065	grey
	MMS1	0.398	0.0075	0.189	0.0115	grey
	DOM34	0.395	0.0005	0.179	0.001	grey
	LHS1	0.366	0.0059	0.162	0.0152	grey
	MRC1	0.396	0.0005	0.157	0.008	grey
	GOS1	0.388	0.011	0.172	0.0082	grey
	RPH1	0.373	0.0015	0.155	0.013	grey
	HOM6	0.341	0.0105	0.241	0.0135	grey
	FPR1	0.375	0.0185	0.151	0.0121	grey
	NUM1	0.397	0.004	0.176	0.0035	grey
	TIF2	0.407	0.0179	0.143	0.0088	grey
	CBP2	0.352	0.0005	0.223	0.0015	grey
	HFA1	0.376	0.0192	0.15	0.0168	grey
	AIM4	0.328	0.0035	0.17	0.0105	grey
	YBR063C	0.406	0.0035	0.173	0.0095	grey
	OPI7	0.383	0.0035	0.165	0.0065	grey
	UBP8	0.398	0.0055	0.184	0.005	grey
	VMS1	0.407	0.0055	0.157	0	grey
	YPL260W	0.303	0.0045	0.161	0.014	grey
	RRD1	0.38	0.007	0.165	0.018	grey
	SEO1	0.361	0.0028	0.17	0.0067	grey
	PUF3	0.378	0.004	0.158	0.0005	grey
	USA1	0.371	0.0073	0.161	0.0096	grey
	HSC82	0.361	0.0054	0.17	0.0048	grey
	CUS2	0.382	0.0059	0.144	0.0053	grey
	ETT1	0.371	0.0049	0.179	0.0043	grey
	GPB1	0.38	0.001	0.15	0	grey
	TPK2	0.381	0.0088	0.163	0.0133	grey
	YPL113C	0.379	0.004	0.157	0.0065	grey
	CTS2	0.372	0.0046	0.173	0.005	grey
	FIR1	0.379	0.0076	0.154	0.0073	grey
	BDH1	0.378	0.0025	0.175	0.0073	grey
	PSR2	0.373	0.0008	0.172	0.0025	grey
	YML020W	0.378	0.0061	0.154	0.0067	grey
	ICY1	0.381	0.0078	0.157	0.0095	grey
	WSC2	0.389	0.0082	0.155	0.0095	grey
	TMC1	0.379	0.0051	0.156	0.0033	grey
	PFA4	0.377	0.004	0.167	0.001	grey
	AFT2	0.377	0.0071	0.16	0.0048	grey
	SMP1	0.378	0.0045	0.151	0.0142	grey
	SIZ1	0.37	0.0101	0.168	0.0033	grey
	YER034W	0.376	0.0057	0.158	0.0009	grey
	GPB2	0.384	0.0057	0.148	0.0042	grey
	APC9	0.385	0.0062	0.154	0.0008	grey
	YAP1	0.365	0.003	0.143	0.0045	grey
	SCJ1	0.362	0.0079	0.182	0.0062	grey
	ALP1	0.38	0.0066	0.151	0.007	grey
	YOR062C	0.368	0.0066	0.171	0.0029	grey
	LAG2	0.376	0.0091	0.153	0.0094	grey
	REV3	0.378	0.0061	0.158	0.0054	grey
	SPO23	0.381	0.0074	0.153	0.0077	grey
	DFM1	0.381	0.0054	0.144	0.008	grey
	GPP2	0.374	0.0084	0.158	0.0064	grey
	ERV46	0.367	0.0014	0.18	0.0102	grey
	LCL2	0.379	0.0046	0.166	0.0078	grey
	TRM12	0.387	0.0025	0.143	0.0095	grey
	YMR226C	0.383	0.0094	0.151	0.0168	grey
	RTC4	0.381	0.0098	0.149	0.0041	grey
	TGL5	0.386	0.0067	0.15	0.0026	grey
	YOL085C	0.378	0.0062	0.158	0.0022	grey
	KIP2	0.378	0.009	0.152	0.0045	grey
	YPT10	0.376	0.0068	0.151	0.0053	grey
	HKR1	0.379	0.0045	0.144	0.0012	grey
	PPT1	0.381	0.0096	0.159	0.0074	grey
	RBG1	0.375	0.0042	0.177	0.0156	grey
	YLR108C	0.388	0.0015	0.16	0.005	grey
	UBC7	0.382	0.0105	0.149	0.0015	grey
	TRI1	0.379	0.0051	0.161	0.005	grey
	CIN5	0.384	0.002	0.166	0.0005	grey
	SNF2	0.222	0.009	0.241	0.0125	grey
	YPL247C	0.38	0.0052	0.16	0.0033	grey
	ISU1	0.376	0.0042	0.157	0.0029	grey
	SNF11	0.395	0.0059	0.149	0.0083	grey
	CAD1	0.388	0.004	0.154	0.0052	grey
	THI4	0.38	0.0057	0.155	0.0152	grey
	FUN26	0.376	0.0017	0.169	0.0039	grey
	YLR124W	0.366	0.0005	0.195	0.0071	grey
	SIP5	0.384	0.0016	0.155	0.0049	grey
	BCH1	0.378	0.0017	0.158	0.0068	grey
	YOR029W	0.384	0.0025	0.155	0.0073	grey
	ISW2	0.39	0.0029	0.144	0.005	grey
	HSP82	0.374	0.0033	0.171	0.0079	grey
	RNY1	0.383	0.0043	0.141	0.0051	grey
	PPH3	0.377	0.0041	0.128	0.0084	grey
	MDM36	0.373	0.0031	0.156	0.0109	grey
	PBP1	0.383	0.0049	0.148	0.0086	grey
	SYN8	0.368	0.01	0.193	0.0165	grey
	YML082W	0.371	0.0118	0.165	0.0074	grey
	NDE1	0.333	0.0107	0.172	0.0146	grey
	CUE1	0.379	0.0039	0.151	0.0164	grey
	CUE5	0.385	0.008	0.138	0.013	grey
	UBC11	0.378	0.007	0.148	0	grey
	FLC1	0.376	0.0041	0.159	0.0082	grey
	MEI5	0.381	0.0058	0.151	0.009	grey
	GIS1	0.381	0.006	0.145	0.0075	grey
	NVJ2	0.376	0.0054	0.159	0.0034	grey
	TDA10	0.375	0.0059	0.158	0.0062	grey
	PSR1	0.366	0.0152	0.184	0.0094	grey
	TDA9	0.287	0.004	0.181	0.0095	grey
	OSW5	0.368	0.0055	0.176	0.0105	grey
	SNN1	0.371	0.0207	0.157	0.0115	grey
	RSB1	0.368	0.0173	0.16	0.0021	grey
	PDE2	0.372	0.0245	0.129	0.0205	grey
	PGC1	0.373	0.0177	0.145	0.0058	grey
	DBP1	0.366	0.0165	0.169	0.003	grey
	STE5	0.383	0.0182	0.157	0.0086	grey
	YND1	0.37	0.0075	0.167	0.0085	grey
	YLF2	0.373	0.0154	0.159	0.0016	grey
	DOG2	0.373	0.0065	0.162	0.0061	grey
	MNL1	0.372	0.0111	0.168	0.007	grey
	MAK32	0.376	0.0095	0.158	0.005	grey
	CRR1	0.375	0.0144	0.153	0.0101	grey
	HSL1	0.365	0.0076	0.169	0.0099	grey
	UPF3	0.328	0.0181	0.183	0.0112	grey
	PNS1	0.366	0.0069	0.172	0.0012	grey
	ISU2	0.318	0.0158	0.164	0.0024	grey
	JJJ2	0.359	0.012	0.184	0.0087	grey
	MRS3	0.371	0.0135	0.152	0.0059	grey
	YLR407W	0.364	0.0078	0.171	0.0088	grey
	SMF2	0.374	0.0031	0.172	0.0071	grey
	ILV6	0.383	0.0065	0.16	0.0132	grey
	YCR022C	0.381	0.0043	0.171	0.0068	grey
	PUT3	0.383	0.0022	0.159	0.0095	grey
	STE3	0.371	0.0033	0.178	0.0036	grey
	TWF1	0.37	0.0054	0.177	0.0068	grey
	DCS2	0.382	0.0012	0.168	0.0099	grey
	YJL218W	0.383	0.0049	0.159	0.0038	grey
	CIS3	0.382	0.0033	0.165	0.0078	grey
	URA2	0.406	0.0064	0.156	0.0104	grey
	PUN1	0.384	0.0065	0.152	0.0065	grey
	CPR2	0.38	0.0041	0.18	0.0083	grey
	FUS1	0.384	0.004	0.173	0.0045	grey
	TIS11	0.388	0.0017	0.154	0.0012	grey
	YKL023W	0.393	0.0019	0.133	0.0036	grey
	TIM21	0.392	0.0026	0.15	0.0149	grey
	YOR097C	0.382	0.0014	0.177	0.0033	grey
	GAC1	0.39	0.0056	0.158	0.0141	grey
	REE1	0.388	0.0031	0.156	0.0021	grey
	FAR1	0.383	0.0024	0.159	0.0026	grey
	NUP2	0.379	0.0017	0.158	0.0128	grey
	FAR10	0.391	0.0034	0.144	0.0024	grey
	YHR078W	0.376	0.0015	0.192	0.001	grey
	MXR2	0.388	0.0043	0.164	0.0101	grey
	YMR074C	0.383	0.0021	0.168	0.005	grey
	PAN3	0.391	0.0019	0.172	0.0082	grey
	SCM4	0.387	0.0052	0.168	0.0083	grey
	CRC1	0.397	0	0.142	0.0099	grey
	YOR186W	0.389	0.0043	0.155	0.0094	grey
	YJL215C	0.381	0.0076	0.156	0.0158	grey
	YJL150W	0.386	0.0008	0.158	0.008	grey
	NIT3	0.382	0.0012	0.161	0.0033	grey
	YLR241W	0.386	0.0009	0.163	0.0081	grey
	BZZ1	0.392	0.003	0.161	0.009	grey
	APA1	0.384	0.0054	0.169	0.0087	grey
	PCD1	0.378	0.0026	0.178	0.0065	grey
	TUL1	0.387	0.0017	0.168	0.011	grey
	FMP48	0.385	0.0014	0.156	0.0025	grey
	RGS2	0.389	0.0022	0.157	0.0069	grey
	MBB1	0.391	0.0012	0.154	0.0114	grey
	IDS2	0.386	0.0075	0.161	0.0128	grey
	STE11	0.399	0.0045	0.152	0.0065	grey
	RCK2	0.389	0.0022	0.159	0.0052	grey
	DMA1	0.382	0.0008	0.173	0.0096	grey
	LRE1	0.375	0.0022	0.181	0.0066	grey
	SKG3	0.38	0.0042	0.167	0.0102	grey
	YKL053W	0.378	0.0058	0.146	0.0116	grey
	YGR066C	0.387	0.0028	0.162	0.0014	grey
	AFI1	0.383	0.0014	0.155	0.0108	grey
	STE4	0.393	0.0016	0.16	0.0037	grey
	SWE1	0.38	0.0008	0.179	0.0078	grey
	YJL144W	0.388	0.0021	0.154	0.0102	grey
	PSY3	0.378	0.0025	0.173	0.0082	grey
	RED1	0.387	0.0022	0.157	0.0042	grey
	SPS100	0.379	0.0036	0.179	0.0068	grey
	YCR001W	0.378	0.0029	0.174	0.0065	grey
	ENT2	0.383	0.0005	0.165	0.0079	grey
	MSN4	0.376	0.0021	0.183	0.0042	grey
	YGR067C	0.385	0.0012	0.15	0.0098	grey
	ORT1	0.375	0.0016	0.167	0.0099	grey
	STE13	0.381	0.0012	0.167	0.0075	grey
	MNN5	0.387	0.0029	0.158	0.005	grey
	YJL135W	0.386	0.0037	0.167	0.0111	grey
	CSR1	0.383	0.0021	0.163	0.0103	grey
	PDR8	0.377	0.0046	0.153	0.0105	grey
	AIM46	0.379	0.0045	0.188	0.0055	grey
	ADY2	0.375	0.0083	0.187	0.0131	grey
	HRD3	0.389	0.0019	0.159	0.0021	grey
	MNR2	0.385	0.0025	0.165	0.0041	grey
	YGR069W	0.376	0.0026	0.17	0.0056	grey
	RUP1	0.376	0.0048	0.161	0.0041	grey
	YOR225W	0.385	0.0045	0.166	0.0094	grey
	ATG36	0.369	0.0035	0.166	0.0085	grey
	LCB3	0.385	0.0036	0.17	0.0037	grey
	SWC7	0.388	0.007	0.151	0.012	grey
	PIG1	0.386	0.0052	0.154	0.0099	grey
	CTH1	0.385	0.0041	0.174	0.0185	grey
	LCL1	0.388	0.005	0.169	0.0171	grey
	DIE2	0.378	0.0045	0.19	0.0115	grey
	TYW3	0.391	0.0049	0.162	0.0125	grey
	SLZ1	0.373	0.0048	0.185	0.016	grey
	EXG2	0.386	0.0017	0.178	0.0116	grey
	BAR1	0.387	0.0098	0.173	0.0119	grey
	PIG2	0.39	0.0056	0.169	0.0181	grey
	BMT5	0.388	0.0037	0.163	0.0068	grey
	MPD2	0.391	0.0057	0.165	0.0172	grey
	YPR039W	0.395	0.0025	0.161	0.0045	grey
	CPR1	0.386	0.0012	0.174	0.0025	grey
	DBF20	0.385	0.0016	0.167	0.0065	grey
	NAS6	0.388	0.0029	0.173	0.0065	grey
	PRM8	0.388	0.0029	0.169	0.0147	grey
	DUG3	0.391	0.0008	0.161	0.006	grey
	BSC2	0.394	0.0045	0.158	0.0126	grey
	SNL1	0.38	0.0039	0.175	0.0097	grey
	PCL7	0.373	0.0054	0.177	0.0188	grey
	YIA6	0.373	0.0205	0.181	0.0195	grey
	MSN1	0.399	0.005	0.16	0.0077	grey
	YPR092W	0.394	0.0024	0.164	0.0098	grey
	YDR215C	0.384	0.004	0.169	0.0125	grey
	CLB2	0.393	0.001	0.166	0.0065	grey
	TOD6	0.384	0.0021	0.184	0.0108	grey
	YGL082W	0.393	0.0045	0.156	0.0126	grey
	NPR1	0.395	0.0066	0.142	0.0095	grey
	ZIP1	0.384	0.0055	0.185	0.013	grey
	YKE4	0.399	0.0054	0.146	0.0056	grey
	GPP1	0.27	0.012	0.201	0.0224	grey
	NAS2	0.361	0.0021	0.166	0.0074	grey
	DOT6	0.392	0.0029	0.166	0.0028	grey
	YJL067W	0.39	0.0012	0.162	0.0101	grey
	ADR1	0.381	0.003	0.16	0.004	grey
	YLH47	0.392	0.0042	0.152	0.0134	grey
	PRX1	0.377	0.0054	0.169	0.0105	grey
	MMS2	0.39	0.0043	0.153	0.0051	grey
	TDA7	0.384	0.0045	0.165	0.0037	grey
	SUR2	0.381	0.0054	0.176	0.0061	grey
	YIL028W	0.362	0.0049	0.168	0.0088	grey
	RGI2	0.391	0.0045	0.138	0.006	grey
	YIL055C	0.392	0.0065	0.149	0.0102	grey
	YHR045W	0.382	0.0012	0.158	0.0107	grey
	THO1	0.39	0.0073	0.152	0.0057	grey
	YPR146C	0.387	0.007	0.16	0.003	grey
	RPN14	0.381	0.0061	0.167	0.0174	grey
	PAN2	0.389	0.0045	0.153	0.0082	grey
	NOP13	0.386	0.0005	0.136	0.009	grey
	HIM1	0.379	0.0034	0.167	0.0087	grey
	YIL029C	0.351	0.0103	0.164	0.0019	grey
	SPO22	0.354	0.0015	0.16	0.0095	grey
	ALR2	0.374	0.0076	0.177	0.0065	grey
	YHR140W	0.382	0.005	0.16	0.0068	grey
	YHR127W	0.388	0.0059	0.162	0.0111	grey
	OST5	0.372	0.0005	0.178	0.0078	grey
	YPR197C	0.373	0.0008	0.179	0.0153	grey
	ATE1	0.37	0.0049	0.176	0.0128	grey
	ZWF1	0.364	0.002	0.173	0.002	grey
	SKO1	0.381	0.0029	0.162	0.0118	grey
	YIL001W	0.37	0.003	0.173	0.012	grey
	YIL032C	0.375	0.0008	0.154	0.0189	grey
	YIL077C	0.35	0.0025	0.17	0.011	grey
	YGR266W	0.37	0.0016	0.174	0.0022	grey
	TSL1	0.371	0.0022	0.164	0.009	grey
	YJR128W	0.378	0.0017	0.159	0.0016	grey
	SAP4	0.361	0.0059	0.195	0.0144	grey
	ARR1	0.37	0.0021	0.178	0.0096	grey
	MIG1	0.365	0.0005	0.214	0.0065	grey
	YNL211C	0.375	0.0025	0.154	0.0152	grey
	YKR047W	0.38	0.0015	0.152	0.0045	grey
	PRM2	0.369	0.0021	0.16	0.0082	grey
	AIM19	0.367	0.0014	0.175	0.0119	grey
	YAP5	0.367	0.0026	0.167	0.0021	grey
	YKU80	0.371	0.0066	0.148	0.0075	grey
	UNG1	0.359	0.0033	0.174	0.0054	grey
	RLM1	0.357	0.0141	0.178	0.0111	grey
	YGR226C	0.36	0.0154	0.166	0.0153	grey
	PNC1	0.36	0.0099	0.17	0.0104	grey
	YNL205C	0.363	0.0116	0.16	0.0067	grey
	MRS4	0.353	0.0128	0.164	0.0009	grey
	TIR3	0.383	0.0145	0.12	0.0061	grey
	CBR1	0.359	0.0126	0.14	0.0064	grey
	PRK1	0.359	0.0133	0.176	0.0144	grey
	IRC21	0.365	0.0118	0.145	0.0043	grey
	YPR012W	0.361	0.0111	0.169	0.0054	grey
	SIP18	0.366	0.0143	0.149	0.0134	grey
	BIO3	0.37	0.021	0.193	0.0055	grey
	DUG2	0.366	0.0147	0.18	0.0031	grey
	PTC6	0.379	0.0161	0.172	0.0045	grey
	YDL177C	0.367	0.0181	0.197	0.0156	grey
	YBR016W	0.367	0.0225	0.202	0.007	grey
	XBP1	0.371	0.0175	0.176	0.0153	grey
	TMA108	0.371	0.021	0.188	0.0215	grey
	PHO23	0.324	0.015	0.198	0.0034	grey
	WAR1	0.361	0.0146	0.179	0.0066	grey
	CSH1	0.368	0.021	0.191	0.008	grey
	YCL023C	0.375	0.0128	0.187	0.0045	grey
	PCA1	0.377	0.012	0.147	0.0125	grey
	TDH2	0.379	0.01	0.153	0.0095	grey
	RBS1	0.359	0.0125	0.202	0.009	grey
	YBR071W	0.381	0.009	0.177	0.0071	grey
	SLM1	0.377	0.0125	0.176	0.0127	grey
	REV7	0.376	0.0073	0.182	0.007	grey
	OCA1	0.403	0.0109	0.127	0.011	grey
	YAK1	0.382	0.0104	0.167	0.0049	grey
	YIL092W	0.376	0.016	0.167	0.014	grey
	YDL009C	0.376	0.0105	0.163	0.0005	grey
	STE24	0.364	0.014	0.215	0.019	grey
	PHO89	0.383	0.0097	0.18	0.0115	grey
	MET3	0.38	0.0066	0.174	0.0034	grey
	YNL013C	0.383	0.0059	0.182	0.0041	grey
	YNL146W	0.378	0.0077	0.183	0.0107	grey
	PFK26	0.383	0.0086	0.174	0.009	grey
	ATG32	0.378	0.0085	0.168	0.0088	grey
	RRT16	0.379	0.0073	0.177	0.0074	grey
	TEC1	0.385	0.0095	0.175	0.0025	grey
	SPG5	0.369	0.0025	0.202	0.0025	grey
	YDL012C	0.374	0.012	0.178	0.007	grey
	GAT2	0.372	0.0043	0.212	0.0105	grey
	MAL33	0.384	0.0033	0.155	0.0025	grey
	YJR061W	0.384	0.0041	0.183	0.0103	grey
	CRZ1	0.39	0.0062	0.178	0.0113	grey
	YNL144C	0.385	0.005	0.189	0.0035	grey
	HIS5	0.383	0.0029	0.179	0.0095	grey
	BNR1	0.407	0.0014	0.136	0.0045	grey
	INP52	0.382	0.0049	0.18	0.0124	grey
	SSE2	0.384	0.0005	0.158	0.004	grey
	MEP2	0.383	0.003	0.167	0.001	grey
	ERP3	0.382	0.0005	0.173	0.002	grey
	HOT1	0.379	0.0024	0.207	0.0079	grey
	RHB1	0.368	0.0015	0.182	0.006	grey
	YDL114W	0.381	0.0083	0.187	0.0145	grey
	ALG12	0.369	0.0077	0.169	0.0129	grey
	YNL134C	0.383	0.0059	0.171	0.0128	grey
	RPI1	0.383	0.0088	0.164	0.0057	grey
	POT1	0.389	0.0033	0.158	0.0076	grey
	YNL115C	0.38	0.0017	0.184	0.0026	grey
	SYP1	0.385	0.0045	0.153	0.0045	grey
	MLP1	0.382	0.001	0.178	0.002	grey
	YDL023C	0.384	0.0005	0.149	0.0105	grey
	NTH1	0.372	0.0005	0.214	0.0025	grey
	YCR049C	0.375	0.0039	0.199	0.0095	grey
	YDL121C	0.381	0.0024	0.18	0.0075	grey
	SSK2	0.37	0.0026	0.16	0.0033	grey
	TEP1	0.383	0.0036	0.189	0.0097	grey
	SIM1	0.377	0.0075	0.178	0.014	grey
	YIL161W	0.382	0.0016	0.172	0.0075	grey
	CPT1	0.382	0.0017	0.182	0.0131	grey
	BPH1	0.376	0	0.184	0	grey
	MSN2	0.375	0.0033	0.189	0.016	grey
	RTK1	0.373	0.0075	0.159	0.0085	grey
	TDA8	0.36	0.011	0.232	0.0085	grey
	YIH1	0.379	0.002	0.205	0.0025	grey
	CMR1	0.38	0.0033	0.18	0.0133	grey
	NTH2	0.38	0.0021	0.187	0.0068	grey
	DMA2	0.383	0	0.179	0.0052	grey
	AYR1	0.387	0.0025	0.163	0.007	grey
	YIL165C	0.392	0.0029	0.163	0.0153	grey
	YDR445C	0.379	0.0024	0.174	0.0158	grey
	ERS1	0.38	0.0031	0.168	0.0074	grey
	HAA1	0.385	0.0014	0.163	0.0065	grey
	YDL027C	0.386	0.0016	0.167	0.0171	grey
	YBR277C	0.359	0.012	0.189	0.016	grey
	SOL2	0.368	0.005	0.192	0.0095	grey
	STE7	0.388	0.0045	0.194	0.0045	grey
	UGA2	0.371	0.0117	0.197	0.0111	grey
	RAS2	0.375	0.0098	0.187	0.0076	grey
	ASG1	0.374	0.0133	0.192	0.0053	grey
	SAL1	0.379	0.0015	0.186	0.0005	grey
	KSS1	0.374	0.009	0.177	0.0084	grey
	DCR2	0.379	0.0099	0.182	0.0059	grey
	YBR134W	0.376	0.012	0.158	0.001	grey
	BSC1	0.38	0.0104	0.166	0.0022	grey
	YDL050C	0.377	0.0052	0.184	0.0143	grey
	APA2	0.355	0.0088	0.197	0.0086	grey
	SAK1	0.385	0.0106	0.168	0.0029	grey
	SSK1	0.367	0.0097	0.163	0.0077	grey
	STE18	0.39	0.0135	0.179	0.007	grey
	LHP1	0.385	0.008	0.175	0.0005	grey
	FIT1	0.391	0.0062	0.177	0.0086	grey
	CHD1	0.393	0.0085	0.163	0.0135	grey
	YOR364W	0.395	0.0057	0.173	0.0016	grey
	SET6	0.397	0.0057	0.172	0.0052	grey
	NDE2	0.387	0.003	0.177	0	grey
	MET13	0.379	0.0025	0.181	0.005	grey
	GRX4	0.404	0.0055	0.142	0.001	grey
	YGR122C-A	0.388	0.0005	0.187	0.0122	grey
	YDL026W	0.395	0.0009	0.167	0.0071	grey
	ASM4	0.376	0.0026	0.179	0.0087	grey
	FLC3	0.387	0.0008	0.183	0.0104	grey
	AAC1	0.39	0.0061	0.173	0.0111	grey
	STE23	0.397	0.0051	0.18	0.0063	grey
	UBC13	0.392	0.0071	0.16	0.0022	grey
	UBX3	0.383	0.0062	0.185	0.0026	grey
	AST2	0.378	0.0076	0.192	0.0084	grey
	RNR3	0.39	0.0058	0.163	0.0008	grey
	YGL081W	0.389	0.0053	0.173	0.0056	grey
	DIG2	0.397	0.0075	0.175	0.0125	grey
	MAM1	0.382	0.0005	0.19	0.0098	grey
	OM45	0.392	0.0037	0.164	0.0086	grey
	NRP1	0.337	0.0071	0.158	0.0025	grey
	GNP1	0.389	0.0097	0.188	0.0059	grey
	AIM20	0.391	0.0057	0.174	0.0063	grey
	HTB2	0.332	0.0098	0.157	0.0045	grey
	BUB1	0.396	0.0033	0.198	0.0099	grey
	HLR1	0.377	0.0015	0.168	0.0035	grey
	VFA1	0.386	0.0041	0.18	0.0135	grey
	VHR1	0.385	0.0025	0.202	0.0025	grey
	COX10	0.354	0.0128	0.201	0.0062	red
	COX18	0.349	0.013	0.204	0.0139	red
	COX19	0.353	0.0025	0.23	0.0055	red
	ATP12	0.33	0.007	0.338	0.006	red
	ATP10	0.343	0.0101	0.276	0.0131	red
	ATP23	0.342	0.0048	0.278	0.0094	red
	QCR7	0.352	0.0015	0.264	0.0125	red
	COX9	0.336	0.0031	0.23	0.0111	red
	COX5A	0.36	0.009	0.169	0.0065	red
	COX17	0.384	0.0078	0.185	0.009	red
	COX7	0.332	0.0141	0.223	0.0095	red
	QCR8	0.36	0.0055	0.203	0.0025	red
	ATP18	0.362	0.0103	0.165	0.0052	red
	QCR2	0.378	0.002	0.199	0.0015	red
	COX11	0.328	0.0102	0.219	0.0063	red
	QCR9	0.38	0.0047	0.184	0.009	red
	ATP20	0.347	0.0012	0.301	0.0046	red
	ATP2	0.372	0.005	0.147	0.0074	red
	ATP22	0.386	0.0048	0.137	0.0045	red
	ATP5	0.335	0.007	0.142	0.0075	red
	ATP1	0.321	0.0017	0.217	0.0147	red
	ATP17	0.35	0.0075	0.13	0.004	red
	ATP15	0.197	0.0054	0.272	0.0139	red
	COX20	0.32	0.0111	0.23	0.0144	red
	COX15	0.336	0.005	0.216	0.011	red
	COX6	0.348	0.0081	0.197	0.0061	red
	COX23	0.351	0.0076	0.222	0.009	red
	COX16	0.372	0.002	0.182	0.0015	red
	ATP7	0.236	0.0111	0.265	0.0133	red
	ATP14	0.371	0.0087	0.175	0.0049	red
	ATP4	0.344	0.003	0.179	0.012	red
	COX13	0.377	0.009	0.146	0.0095	red
	COX5B	0.388	0.0053	0.171	0.0014	red

## Sheet: Fig-2E
MUTANT	% WT-like
HKR1	86.09
PPH3	85.66
YKR047W	85.26
RPS30B	84.89
CUE1	84.55
GPB1	84.51
THI4	84.17
YOL085C	84.12
YPL113C	84.01
YML020W	83.9
TIF1	83.85
NIT3	83.72
YNL211C	83.7
YPL247C	83.66
YHR045W	83.62
SKO1	83.61
NUP2	83.54
ISU1	83.46
YKL053W	83.44
SMP1	83.41
ALP1	83.38
AFT2	83.35
REV3	83.29
ERS1	83.25
YIL161W	83.24
TRI1	83.23
BCH1	83.22
CIS3	83.15
NVJ2	83.15
TDA10	83.12
YLR366W	83.1
UBP2	83.08
DCS2	83.04
TMC1	83.04
FAR11	83
YIL032C	82.91
YDL180W	82.87
YDR445C	82.84
YOR097C	82.84
RAD27	82.81
YER034W	82.74
YPT10	82.71
YJR128W	82.58
SNL1	82.53
CPT1	82.52
BDH1	82.51
BPH1	82.49
YLR358C	82.46
HIR2	82.39
PDR8	82.38
STE13	82.35
SKG3	82.33
YDL121C	82.31
SUR1	82.3
RRT16	82.25
YNL115C	82.22
OAR1	82.17
MDM36	82.14
CMR1	82.1
HIM1	82.1
PAP2	82.1
PRX1	82.08
GPP2	82.08
FLC1	82.06
LCL2	81.96
SCS7	81.96
NTH2	81.94
YCR022C	81.94
PFA4	81.94
HHF1	81.88
LAG2	81.72
ARO1	81.71
ATG32	81.69
APL2	81.69
PIN4	81.68
NST1	81.65
VAM6	81.45
YGR069W	81.32
EST3	81.32
LSM1	81.31
YDL157C	81.22
SLC1	81.2
HSP82	81.15
JJJ1	81.15
YJR087W	81.11
PSR2	80.97
NHX1	80.95
REV7	80.93
BUD14	80.88
MSN2	80.86
TMA22	80.76
URA7	80.76
ECM8	80.76
ATP2	80.75
CGR1	80.66
MAK32	80.63
YCR001W	80.58
SRN2	80.49
PSY3	80.47
RPL26B	80.45
ORT1	80.44
RPL26A	80.32
MSN4	80.27
VPS75	80.18
YHR078W	80.15
YNL146W	80.12
MKC7	80.12
FOX2	80.12
PRM2	80.03
YLL007C	80.02
YAF9	79.99
YPR197C	79.97
DMA1	79.97
SWE1	79.96
RPS24B	79.96
ASK10	79.89
SAT4	79.87
CTS2	79.85
FRA1	79.83
NPR3	79.82
MGR2	79.78
CSG2	79.77
MAM1	79.75
FRE6	79.75
FLX1	79.74
YAP1	79.73
SMI1	79.71
YOR008C-A	79.7
RBG1	79.69
SPS100	79.68
YJL120W	79.68
YIH1	79.67
STM1	79.66
PCD1	79.65
TSL1	79.63
COQ6	79.63
SPO7	79.62
MET13	79.61
LYS12	79.61
RUP1	79.6
YKU80	79.59
MRS3	79.54
GCN4	79.53
RTK1	79.49
COQ9	79.49
KSS1	79.48
YDL050C	79.42
PAM17	79.42
FUN26	79.4
YDR426C	79.4
SMF2	79.39
YOL035C	79.37
YLF2	79.3
DYN1	79.27
SRO7	79.22
ALR2	79.19
SIZ1	79.18
RAD14	79.14
BIO4	79.12
MRPS9	79.11
SNF4	79.11
SWC5	79.1
SAL1	79
SSK2	79
PCL7	79
YGR266W	78.98
RAS2	78.93
ARG2	78.93
YJR037W	78.93
AIM44	78.89
PMS1	78.84
ATE1	78.77
DOG2	78.76
ADY2	78.75
YIL001W	78.7
ASG1	78.64
ARR1	78.62
YFR032C-B	78.61
YND1	78.6
CPR2	78.58
PDA1	78.55
QCR9	78.51
YML082W	78.39
USA1	78.37
AIM19	78.33
MNL1	78.33
AST2	78.26
IPK1	78.23
URA5	78.22
GCS1	78.21
HLR1	78.17
VAN1	78.17
ETT1	78.15
MIG1	78.14
YCR049C	78.09
ASM4	78.05
UGA2	78.05
HOT1	78.05
SIP18	78.02
EXO1	78.02
VAC7	78
PEF1	77.98
OST5	77.96
LIP2	77.96
YAP5	77.94
RCN2	77.9
YDR442W	77.8
RMD9	77.77
YGL218W	77.76
ATP14	77.75
SNF8	77.73
EAF6	77.7
STE3	77.65
PNS1	77.61
YOR062C	77.6
SHR5	77.6
OCA5	77.58
TWF1	77.55
OLA1	77.52
ARP1	77.49
GTF1	77.46
IRC21	77.44
PTK2	77.39
HOM3	77.27
ALG12	77.25
OSW5	77.22
GCN1	77.2
LYS9	77.19
THR4	77.16
INP2	77.08
SLZ1	77.06
YGR125W	77.06
NPL6	77
RSB1	76.96
VPS8	76.96
SPT2	76.96
YNL205C	76.93
RPL17B	76.86
YMR153C-A	76.84
RPL40B	76.82
HMI1	76.8
SLX5	76.77
ATP18	76.75
RHB1	76.74
ZWF1	76.72
SNN1	76.68
YVH1	76.64
RPS14A	76.61
PTC1	76.6
YLR407W	76.59
NTH1	76.58
SEA4	76.55
SPG5	76.5
LRE1	76.49
SCJ1	76.45
FYV1	76.44
DBP1	76.43
NUP170	76.42
UBA3	76.34
VPS27	76.29
PNC1	76.28
YLR124W	76.25
QCR2	76.17
AIM26	76.09
IES5	76.05
TIF4631	76.03
WHI5	76.02
PPQ1	75.98
RAV2	75.97
YJL211C	75.97
TCO89	75.95
GIS4	75.95
YCL023C	75.93
PEX13	75.91
ISA1	75.91
YER077C	75.91
FSH1	75.84
GAT2	75.82
YMR193C-A	75.81
PSR1	75.78
RPH1	75.78
HSL1	75.77
MRPS5	75.77
SYN8	75.76
PEX22	75.64
SLO1	75.58
DOT5	75.55
PEX32	75.54
YPR117W	75.54
SSA4	75.53
BRO1	75.52
KCH1	75.44
ATG36	75.42
YGL149W	75.41
YIL028W	75.4
MSH2	75.37
SRP40	75.36
SGF11	75.33
YDL177C	75.29
DFG16	75.19
LIA1	75.12
YGR039W	75.11
EGD1	75.08
PEX4	75.03
SOD1	75.02
POL32	75
YFL013W-A	75
PEX1	74.96
LHS1	74.9
IMP1	74.8
STP22	74.79
YGL046W	74.76
YHM2	74.72
SWI5	74.7
ERV46	74.68
STP22	74.68
YNL109W	74.66
PEX10	74.65
YKL075C	74.61
GGA2	74.61
RPL2B	74.6
RPL24B	74.6
SAM1	74.52
DUG2	74.5
NAS2	74.49
COY1	74.44
CYC2	74.43
SOL2	74.41
YLR202C	74.36
ACO2	74.34
STP1	74.34
DEF1	74.34
ERG4	74.33
ATG13	74.32
RTT101	74.31
TLG2	74.23
ENT4	74.22
YGR226C	74.17
BUL1	74.16
RSM18	74.11
YPR012W	74.06
ASC1	74.06
SSK1	74.02
CCZ1	74
LAT1	73.99
GSH2	73.97
TSA1	73.97
COQ10	73.9
QCR8	73.9
MRP10	73.86
UBP6	73.85
IRC25	73.83
RCO1	73.83
RAD55	73.81
PRK1	73.79
RPL8B	73.79
DOA1	73.79
ARG82	73.76
NIP100	73.76
YAR1	73.75
RAD57	73.74
WAR1	73.66
VAC8	73.64
RPL4A	73.63
MRF1	73.62
ETR1	73.61
COQ8	73.49
UNG1	73.46
FYV12	73.46
LCB5	73.43
CBR1	73.41
STE24	73.39
DUF1	73.39
GCN20	73.16
MSI1	73.16
SEC28	73.11
VPS17	73.09
YIL060W	73.02
MRPL20	73.02
TMA20	73.02
MTQ2	72.99
UBX2	72.98
HSC82	72.97
PET123	72.95
AKR1	72.94
YDR290W	72.93
BIK1	72.89
MRPL8	72.85
RAD5	72.77
PMA2	72.76
UBI4	72.74
GTR2	72.69
SAP4	72.6
MST1	72.58
RPS1B	72.56
CBT1	72.55
PUF6	72.49
RLM1	72.43
YMR166C	72.4
RPL29	72.4
VPS55	72.35
PEX15	72.29
IES1	72.25
ILV1	72.21
ATC1	72.21
RPE1	72.13
FIS1	72.13
ATS1	72.05
MRPS28	72.04
SEO1	72.02
RBS1	71.98
YBR277C	71.94
TRM7	71.93
YKL069W	71.84
BRE2	71.8
ERG28	71.78
IMG1	71.7
CTF8	71.66
NOP6	71.65
LSM7	71.65
CBS1	71.58
HDA1	71.55
DAL81	71.53
SLG1	71.53
HOG1	71.37
FUS3	71.35
EDE1	71.33
MRH4	71.21
RAD54	71.21
CYK3	71.15
MSS51	71.14
VPS62	71.11
DSS1	71.09
MIC27	71.06
UBP15	71.06
YBR292C	71.05
MDM31	71.02
OST3	71.02
IRC13	71.01
TRS65	70.98
VPS28	70.96
PSY1	70.86
MRS1	70.84
DIG1	70.83
RPA34	70.82
HAP5	70.8
NHP10	70.77
MRPL11	70.71
VPS72	70.67
JJJ2	70.66
ECM7	70.66
CKB1	70.56
AGE2	70.54
FKS1	70.5
COR1	70.49
VPH1	70.41
HOM2	70.38
CTF18	70.38
COX5A	70.29
PAC10	70.28
YGR050C	70.24
NEM1	70.22
REF2	70.2
KAP123	70.02
NOT3	70
DHH1	69.98
SKI3	69.97
PET111	69.95
YKR051W	69.95
SEC23	69.88
RIM13	69.86
RIM8	69.83
COX10	69.81
YGR050C	69.8
RRG8	69.75
MRS4	69.73
YLR290C	69.73
YKE2	69.72
COX19	69.69
TPM1	69.67
NKP2	69.66
ARP6	69.55
PET309	69.52
VPS71	69.49
SPO22	69.46
MRPS35	69.44
ADH1	69.36
TRP4	69.35
CYT2	69.33
RIM9	69.2
DIA4	69.15
VPS24	69.08
YBL100C	69.06
RPL40A	69.05
PEP8	69.02
YPT7	69.01
MSS116	68.99
CYT1	68.96
PET117	68.92
AVL9	68.92
PEX5	68.92
TDA8	68.9
RIM20	68.9
CBP3	68.88
SPC72	68.84
COX23	68.82
CYC3	68.8
COQ1	68.8
BLM10	68.7
SSN2	68.62
RPS22B	68.45
ICE2	68.37
SAC6	68.36
COX18	68.33
CTF8	68.29
SNC2	68.29
BRE5	68.27
VMA21	68.15
CBP2	68.14
MRM1	68.14
RPL34A	68.13
PEP5	68.1
GET2	68.08
RPL36A	68.06
MRPL1	68.04
SSD1	68.03
CBS2	68.02
VTS1	68
QCR7	67.97
MSK1	67.89
REC104	67.88
ISM1	67.84
ARO7	67.76
SUV3	67.73
MRPL6	67.7
GIM5	67.66
YAR029W	67.42
RPS7B	67.37
COQ4	67.29
RLF2	67.28
MDL2	67.27
MRP17	67.26
SLX8	67.15
MRPL37	67.09
CGI121	67.01
YIL077C	66.94
VPS34	66.92
BCS1	66.9
SGS1	66.83
HBS1	66.77
CAC2	66.75
GAL11	66.72
KIN4	66.71
MRPL4	66.63
PFK1	66.62
YGL007C-A	66.55
BCH2	66.53
MSD1	66.52
TFA2	66.46
SAC7	66.29
YPL080C	66.29
GLC8	66.28
RPS4A	66.25
MSR1	66.23
UBC4	66.21
HER2	66.17
TIF4632	66.07
MRPL35	65.97
PET122	65.94
MRP21	65.91
CBP6	65.91
BRR1	65.84
BDF1	65.82
OST4	65.68
PEP1	65.64
MCT1	65.6
VPS20	65.55
SGF73	65.52
RPL9B	65.49
MRPL33	65.48
APA2	65.47
PUB1	65.41
MRP20	65.29
YNL120C	65.29
VID22	65.28
SKI8	65.27
UTH1	65.2
RPL12B	65.19
YIL029C	65.18
DCC1	65.18
MSF1	65.15
MRP1	65.15
MSC1	64.99
RSM23	64.9
VPS33	64.88
COA2	64.85
MON1	64.83
SUS1	64.79
SST2	64.72
SEM1	64.69
LEA1	64.6
MRP51	64.6
SWM2	64.55
RPS25A	64.46
UFO1	64.41
YBR100W	64.34
YLR374C	64.27
VPS25	64.16
PET54	64.15
AEP2	64.08
TOP3	64.04
RPS11A	64.01
VMA2	63.98
COX6	63.95
RSM24	63.91
ARV1	63.87
OPI8	63.8
IFM1	63.71
RTT106	63.68
SIS2	63.65
LEO1	63.63
RVS167	63.6
SNF7	63.5
MRP4	63.48
OPI1	63.47
DOA4	63.42
NAT1	63.36
RSC2	63.3
TRK1	63.25
MRPL40	63.16
RPN10	62.98
VPS63	62.85
HIT1	62.76
SWS2	62.68
RRG7	62.63
GUS1	62.63
RPA14	62.61
YGR160W	62.57
EGD2	62.53
MSE1	62.45
PHO88	62.42
MGA2	62.37
PBY1	62.36
YMR031W-A	62.26
MDM38	62.26
PET112	62.05
EST2	62.04
MRPL24	62.02
HEL2	62
MRN1	61.9
WHI2	61.66
HTA1	61.62
SOV1	61.55
KAP122	61.55
ERF2	61.45
RIM101	61.41
IES3	61.4
PLC1	61.33
DID4	61.32
ATP17	61.3
NUT1	61.27
WSS1	61.2
URC2	61.19
ATP10	61.12
GTR1	60.99
CBP1	60.95
ESC2	60.92
SSF1	60.9
AIM29	60.78
BEM2	60.75
COQ3	60.74
YCL062W	60.44
SAP30	60.38
VMA4	60.38
MRPL15	60.32
2017-10-01	60.27
ATP23	60.1
CCM1	59.75
LDB19	59.71
MET22	59.64
YGL152C	59.46
COX9	59.42
HDA3	59.39
MRPL13	59.26
SWF1	59.25
RAM1	59.24
MNN9	59.1
ELP3	59.05
MHR1	59.01
YDR203W	58.97
ATP4	58.93
ABF2	58.78
SBP1	58.73
POC4	58.61
SHU2	58.55
DST1	58.38
COA3	58.35
TVP18	58.23
GCV3	58.15
TRM9	58.14
VPS54	58
HOM6	57.99
RPL19A	57.85
PEX14	57.85
ATP12	57.68
NUP188	57.65
PIM1	57.6
COX15	57.52
DBP3	57.51
HOS4	57.48
ATP20	57.44
PET100	57.43
RMI1	57.4
YLR363W-A	57.34
IXR1	57.33
EAF1	57.31
MSM1	57.23
SGF29	57.15
HTD2	57.11
MRPL3	57.07
COA4	57.03
RPS6A	56.96
RPS0A	56.93
YGR064W	56.89
MRPL32	56.81
MUD2	56.75
MRPL49	56.58
MSW1	56.14
TUF1	56.13
RPL37B	56.05
COX7	56.05
UME6	56.03
MGM101	56
DUN1	55.89
CCR4	55.82
RPS1A	55.5
QRI7	55.35
UPS1	55.14
FES1	55.14
GIM3	54.98
YML090W	54.94
ARP8	54.93
SWD1	54.93
ELO3	54.8
MMM1	54.71
RPN4	54.47
THO2	54.41
YTA7	54.38
SKI2	54.29
RTR1	54.12
COX11	54.08
SLA1	53.86
VPS5	53.59
RPL16A	53.5
HAP4	53.36
VPS51	53.24
PEX2	53.1
PEX12	52.97
AMF1	52.93
YPL205C	52.74
MIC19	52.74
NDE1	52.68
CIK1	52.58
VPS64	52.38
RPL27B	52.34
KTI12	52.1
CEM1	52.09
YGR237C	51.97
RPS11B	51.89
FPS1	51.76
YBR196C-A	51.74
RPL24A	51.73
SWD3	51.63
EFT2	51.62
NRP1	51.45
MRPS12	51.25
MEH1	51.02
RPL23A	50.77
BTS1	50.71
OPI9	50.56
MEF2	50.5
SYO1	50.15
MRPL51	49.95
YLR111W	49.79
YML102C-A	49.76
HPM1	49.73
EMI1	49.71
MNE1	49.62
ARD1	49.33
SYO1	49.33
SAP30	49.16
YOL050C	49.15
MRE11	49.1
MRPL7	49
ELP4	48.92
POR1	48.89
SLA1	48.69
MMR1	48.67
HTZ1	48.51
YML010C-B	48.16
CDC50	47.86
ARX1	47.75
MTG2	47.29
YDL119C	47.14
UPF3	47.1
IES6	46.61
YTA12	46.54
BUB3	46.53
SHE9	46.35
CTR1	46.34
SPT8	46.29
RSM19	46.16
HTB2	45.94
RSM27	45.91
GET1	45.67
PRE9	45.67
MGM1	45.63
VAM7	45.6
RTC6	45.57
RAD51	45.54
ATP5	45.45
BUD26	45.43
VPS9	45.41
MRPL9	45.4
ADK1	45.4
SLM3	45.33
CDH1	45.17
RRP6	45.08
NUP133	44.78
RPS19A	44.75
MTF1	44.69
PHO23	44.64
TGS1	44.54
ATP1	44.49
GEP5	44.3
RPS10B	44.28
YGR219W	44.23
SEH1	44.21
RPS23A	44.17
LDB18	44.13
FRA2	44.11
HAP3	44.05
MTM1	44.03
RPP1B	43.45
PHO86	43.15
SIF2	43.14
COX20	42.95
RPS16B	42.92
CTK1	42.86
ARC18	42.74
SCO1	42.72
DEP1	42.42
YDR179W-A	42.37
RPS18B	42.19
ARP5	42.18
RAD52	42.13
YGL072C	42.1
SLX9	42.05
RRP8	41.94
AIM4	41.86
PRO2	41.75
RPL19A	41.61
URM1	41.3
TEF4	41.15
LSM6	40.99
FES1	40.78
GEP4	40.73
YLR402W	40.44
PCP1	40.43
RPS24A	40.35
TPN1	40.34
LRP1	40.32
MRPL38	40.27
RPS21A	40.23
NCS2	40.1
BEM1	39.75
RPL13A	39.67
RRG1	39.39
FES1	39.29
BIM1	39.17
CTF4	39.1
PHO80	39.08
HDA2	38.85
ELP2	38.81
IES2	38.75
ALT1	38.47
RPP1A	38.38
SIC1	37.97
RPL35B	37.83
TIM11	37.73
PEX8	37.66
SET2	37.59
NAM2	37.49
GEM1	37.43
MRPS16	37.3
RPO41	37.3
MRPS8	37.26
NCS6	36.95
CNM67	36.85
DEG1	36.84
YBL071C-B	36.63
CRD1	36.56
UBA4	36.54
FMC1	35.7
POS5	35.44
RPL6B	35.42
RPL9A	35.35
PRO1	35.03
NBP2	34.93
YLR235C	34.87
ISU2	34.7
MRP7	34.25
IKI1	34.11
AEP1	34.09
CKB2	33.73
VIP1	32.86
RAD50	32.23
IKI3	31.95
SHP1	31.9
YPL102C	31.81
NOP12	31.7
RPS29B	31.63
RPS4B	31.6
RPS18A	31.58
TOM1	31.57
TPS1	31.46
CCE1	31.25
STO1	30.97
PEX3	30.65
ZRT1	30.52
ZAP1	30.49
RPL42B	30.47
RSM27	30.46
SLS1	30.05
APQ12	30.05
MDM12	30.03
RPL7A	29.96
SAC1	29.87
GEP3	29.48
RPS29A	29.44
XRN1	29.36
YLR264C-A	29.3
SIN3	29.24
CCE1	29.23
VPS65	29.14
MRPL36	29.05
PKR1	28.69
IWR1	28.56
FYV7	28.36
IST3	28.13
RTF1	28.08
YGL188C-A	27.91
SKY1	27.78
RPL19B	27.7
ADO1	27.65
RPS6B	27.57
SWA2	27.28
YBR174C	27.28
MRPL23	27.25
MRPL16	27.09
RSM22	26.92
ADH3	26.76
CSF1	26.47
BRP1	26.34
MMS22	25.86
YMR242W-A	25.56
EAP1	25.35
MOG1	25.31
HUR1	25.2
ERG3	25.01
ILM1	24.91
RPL34B	24.49
MEF1	24.47
BUD16	24.2
RPS16A	23.97
BUD31	23.64
VPS41	23.58
MET7	23.45
RPS28B	22.71
SLM5	22.67
YPL260W	22.24
URE2	21.15
NUP120	20.93
ARC1	20.92
VIP1	20.58
KCS1	20.52
NUP84	20.2
MED1	19.89
STB5	19.56
PMR1	19.34
PIH1	19.15
UBP3	19.1
THP3	18.97
YDR115W	18.95
LGE1	18.88
MTG1	18.82
SAM37	18.38
SAC3	18.11
MRPL25	18.06
RPL20A	18.05
MRT4	17.93
RPS10A	17.7
CPR7	17.63
MET18	17.17
MSY1	16.96
ELP6	16.85
VPS3	16.69
POP2	16.38
SPT21	15.86
PEP12	15.44
RPL43A	14.68
SSZ1	14.56
GLN3	14.44
SSN8	14.4
FTR1	14.36
YOR309C	13.84
ALD6	13.72
ZUO1	13.69
ARO2	13.49
TDA9	13.3
GPM2	13.16
EOS1	13
GMC2	12.99
BUD30	12.97
VMA13	12.78
YNL171C	12.39
CCW12	12.25
YLR184W	12.08
MNN10	10.82
SPE3	10.82
SNT309	10.81
PDX3	10.73
RAI1	10.45
SSE1	10.21
RPL14A	10.19
RPS0B	9.72
RPS17A	9.64
BUD21	9.61
END3	9.54
LST7	9.45
KRE28	9.36
LYS20	9.22
RPS9B	9.21
NAT3	8.96
COQ5	8.42
UMP1	8.4
RSM7	8.27
GPP1	8.26
AAH1	8.12
RPS8A	7.9
THP1	7.74
PEP7	7.68
HCR1	7.46
RPL43B	7.31
YPL062W	7.29
RPP2B	6.84
NPL3	6.7
AAT2	6.2
ADA2	6.04
PHO85	5.98
ATP7	5.82
IRC14	5.73
RPL13B	5.58
BUD27	5.42
DBP7	5.34
RPB9	5.32
MDM20	5.3
RIC1	5.01
RPS7A	4.94
RPS27B	4.93
GLO3	4.58
LOC1	4.31
SPE2	4.26
NSR1	4.09
HMO1	4.04
YME1	3.95
NGG1	3.43
MDM10	3.36
BUD28	3.11
RIM1	3.1
VPS16	2.9
YGR272C	2.8
RPL22A	2.57
SSQ1	2.55
MSH1	2.41
SNF5	2.17
RNR1	1.95
YDJ1	1.68
YNL170W	1.59
UGO1	1.43
SFP1	1.41
SLM6	1.26
SPT10	1.26
AIM10	1.24
RPL35A	1.22
RTG3	1.09
SPT4	0.99
ATP15	0.92
SIT4	0.9
RTG2	0.9
MOT2	0.86
OPI11	0.78
GND1	0.75
MKS1	0.69
VPS29	0.69
SPE1	0.67
YEL045C	0.66
MAP1	0.61
VMA3	0.6
RTT109	0.56
GRX5	0.54
SNF2	0.5
DOC1	0.47
SER1	0.37
RCY1	0.35
IDH1	0.32
IDH2	0.3
FEN2	0.27
RTG1	0.22
BUD19	0.17
VMA7	0.13
CYS4	0.06
SER2	0.01
