# Supplementary material for: Single cell functional genomics reveals the importance of mitochondria in cell-to-cell phenotypic variation
Source: eLife journal article supplement (doi:10.7554/elife.38904), 2019-01-14
Supplement: supp [file elife-38904-supp-v1.zip › elife_poa_e38904_Figure_3_source_data_1.xlsx]

## Sheet: Fig-3A
	loge(TMRE intensity) (a.u.) distribution
	WT		atp23Δ		tim11Δ		mdm38Δ		mrc1Δ		pub1Δ
	5.03955		8.52214		8.27609		8.00876		5.71703		5.82186
	6.6034		8.11803		6.10658		6.75507		4.8828		5.64332
	6.27965		8.40631		3.30322		7.2117		-0.223144		4.99721
	7.11899		9.05102		7.71744		7.55171		0.875469		2.34181
	6.54535		6.47266		6.08495		7.63124		6.65105		4.18358
	3.76584		8.94627		7.5279		7.93451		6.30628		4.33073
	7.7991		8.27751		7.82788		7.92037		2.41591		8.44057
	5.43634		8.70603		7.99672		5.44328		6.07581		4.85826
	6.91015		9.02959		8.06966		8.19202		5.54205		7.89088
	4.37198		8.66768		7.88998		7.81601		6.30189		2.41591
	4.35157		8.57214		7.79943		6.93693		1.72277		4.48639
	7.4165		8.56255		4.21951		7.93078		3.24259		4.6747
	3.38777		6.98767		6.56583		8.65144		6.32364		4.63667
	7.17503		8.11013		5.43982		8.56895		6.04025		4.59714
	7.20042		8.20106		7.84745		7.78189		4.58904		5.23218
	6.78897		8.82597		8.43364		8.41574		3.36038		4.59714
	7.63627		9.11427		8.63821		8.16326		5.81711		8.17143
	6.90455		8.82079		5.55451		8.40147		4.48639		3.8373
	8.88815		8.51206		8.18401		8.63166		5.49388		3.95124
	6.6417		8.01248		5.87942		7.5981		2.41591		3.17805
	5.84759		8.89322		8.32574		7.94563		5.87493		6.15528
	3.68888		8.77128		8.53825		4.68951		3.14415		7.78256
	4.18358		9.00671		8.39949		7.98562		2.95491		5.87493
	9.04763		9.07512		5.66018		7.4951		4.90082		4.50424
	5.84064		8.44986		4.35157		7.93909		5.74812		7.67341
	5.53891		8.95198		7.59689		7.52575		8.71144		3.21084
	4.49536		7.81956		4.90676		7.63007		5.10958		6.04595
	7.19983		9.28166		8.15892		8.18735		3.51453		3.74715
	5.17953		9.75638		8.00182		8.03087		3.68888		6.58258
	4.93591		6.13988		8.62895		7.12609		5.57897		8.40111
	4.53045		8.44591		7.47261		6.20658		4.94164		8.77845
	4.68213		8.7184		8.30578		8.26111		8.18021		7.70922
	5.33368		8.50642		2.48491		8.30973		5.12396		5.10473
	5.89495		8.53039		8.468		7.35141		7.78189		4.8331
	7.33224		9.19543		6.5692		8.64414		5.78074		3.8712
	1.72277		7.90986		8.06338		7.38523		5.03435		4.13357
	4.76046		9.07145		8.18379		8.66796		6.29895		5.24492
	5.26579		8.67972		5.65179		8.54854		7.70201		4.88884
	7.06305		8.62881		8.02434		7.44308		6.126		7.62657
	5.69306		8.86367		8.35815		8.4787		5.40087		6.45646
	5.83598		9.09614		8.18869		6.62486		5.13815		4.88884
	7.84244		8.59089		6.04406		8.27833		3.36038		4.01096
	7.49554		8.81225		5.40448		5.2575		6.4128		4.55598
	5.7091		8.71289		8.80255		7.91775		2.7213		8.25656
	4.25419		8.16985		7.61756		7.6021		2.99573		7.76777
	5.02913		9.0893		8.6365		6.66134		4.53903		3.95124
	5.24913		9.38093		8.58866		7.27849		6.34071		8.31698
	5.78321		8.38699		8.45105		0.875469		6.08495		2.34181
	6.59578		8.53637		6.17711		8.17707		4.84576		2.61007
	7.84463		8.02643		8.78263		7.7637		9.10835		6.57703
	4.15888		7.93279		8.9266		4.60517		6.126		3.88773
	8.23938		8.03217		7.70418		7.9878		5.87268		5.51343
	7.17503		8.10337		8.50285		8.05782		1.72277		5.02388
	6.46272		7.16085		8.76268		8.53007		4.76046		6.6417
	4.30946		9.04773		8.65172		8.33826		6.52679		2.66723
	3.27336		9.75332		6.6417		8.99099		5.19739		4.68951
	3.93574		8.34778		3.98155		8.03398		6.53959		3.46574
	5.48728		8.42771		8.27466		8.37434		3.85439		6.62698
	1.97408		9.86981		8.77165		7.65804		5.33754		4.24276
	6.42584		8.95705		7.78854		7.45101		5.21058		4.54754
	6.39959		8.82114		7.73438		8.26235		5.12396		4.78749
	6.36578		7.86879		7.18599		6.72959		4.65205		5.5483
	6.87109		8.09365		8.67112		7.97687		5.21058		4.01096
	6.67254		8.21609		9.08722		7.27017		6.95845		3.49043
	5.45018		8.25344		7.95409		4.66721		4.4403		3.64806
	6.16877		8.46733		8.14485		8.6209		5.10473		6.57032
	5.04471		8.59623		7.542		7.76268		5.49717		5.84064
	4.87672		8.30083		7.27517		7.48302		5.94856		8.27609
	6.8661		8.70933		9.40834		7.65463		4.4403		4.91852
	4.17131		8.95859		8.51991		7.78456		4.53903		5.80754
	6.37944		8.12089		6.2178		6.40886		3.07269		3.98155
	7.38672		8.82926		8.2765		8.22491		5.87718		2.07944
	5.64897		7.84557		8.77153		5.34901		5.59694		5.19739
	6.40092		7.66068		8.82055		8.0811		4.62104		1.38629
	5.14283		9.58279		7.66594		7.87914		4.25419		4.03954
	8.45855		9.23022		6.46397		7.99807		4.40183		6.3699
	7.75482		9.82401		8.77648		8.46884		4.60517		2.82138
	4.21951		8.50835		4.90676		7.22577		5.39363		4.49536
	7.50835		9.1994		9.12626		8.56392		6.16374		4.68951
	4.54754		9.01753		8.42103		6.94698		3.36038		4.4403
	5.5576		8.44281		8.30736		7.55213		3.30322		4.44969
	2.66723		8.96944		7.69658		8.0225		5.78074		5.27811
	3.8373		8.09633		8.79567		8.49813		3.30322		1.72277
	6.98546		8.65591		7.97247		8.48368		5.585		2.07944
	6.16877		8.92287		5.67401		7.56755		5.30231		5.19296
	6.37537		8.99318		6.35333		8.57062		4.60517		4.4403
	7.0282		8.05985		8.24402		7.93509		1.38629		4.93015
	5.55451		8.74206		8.00583		8.16212		5.6058		6.67456
	7.01535		9.08405		5.24492		7.3956		6.05725		3.8712
	7.26066		9.08441		8.20259		7.05618		6.70441		8.70563
	4.18358		7.98752		8.01566		7.69694		3.6055		4.17131
	8.43538		7.87853		8.66878		9.40294		4.94164		5.58199
	8.8202		8.9876		5.97737		8.44643		6.24144		4.49536
	7.95521		8.53086		8.15731		7.8574		7.66106		5.41521
	6.03452		8.06489		5.56375		7.87459		6.43358		7.86234
	7.04089		8.62966		6.94389		6.40886		4.44969		3.96651
	4.96424		9.4297		6.75414		8.83416		5.08512		6.21301
	6.14504		8.19555		7.70346		7.97384		6.10301		4.33073
	4.21951		8.26688		8.04045		5.64897		3.10906		4.60517
	5.09498		8.95715		5.56068		8.92553		6.84673		5.92319
	6.89892		8.7814		5.52625		8.15915		3.70868		6.01713
	6.04784		9.0512		7.80205		8.2015		6.04973		4.35157
	5.91889		8.90338		7.49332		6.93381		8.60168		6.31933
	5.07517		8.32244		8.47854		8.15869		1.38629		8.76805
	6.24611		8.01407		8.2294		8.4807		4.39198		5.26992
	3.21084		8.27894		8.26627		6.72383		4.70411		4.45899
	4.65966		8.42297		7.39018		6.77901		8.53039		8.58657
	6.85857		8.77041		8.46261		8.48036		4.99179		5.79057
	4.69684		8.02145		8.49601		7.45703		5.17048		4.86445
	6.36303		9.39213		6.98989		8.47353		6.53843		4.81381
	7.04578		7.91074		9.16459		8.59785		7.38374		3.6055
	5.95687		8.85332		7.92934		8.09755		3.24259		4.27667
	4.54754		7.6293		5.18403		6.51856		5.30231		8.93485
	0.875469		8.29024		8.96577		8.14555		4.43082		4.41159
	8.31933		9.0884		6.53379		6.41017		5.19739		4.55598
	6.6886		8.79604		8.87425		7.87185		6.59578		7.28729
	4.20767		8.87961		8.24738		7.80727		5.11919		6.58369
	5.0186		8.42244		8.20893		8.56514		6.59796		4.41159
	4.33073		9.57382		8.21023		8.18066		3.38777		4.03954
	6.82089		8.30697		8.0811		8.84552		6.79347		4.73268
	5.14283		7.9697		8.40398		8.43172		6.53263		5.35659
	3.03495		8.52738		5.41521		8.95859		4.62889		6.36027
	3.80221		9.5416		6.09582		8.86661		3.627		5.0186
	7.52532		9.18588		7.82116		8.01935		4.68213		4.43082
	7.46623		8.13997		8.01988		8.53747		4.32015		9.05467
	3.3322		8.04019		8.17976		8.7354		4.29865		3.90399
	6.32221		8.20434		8.29305		8.50382		6.2569		6.07948
	3.98155		8.29525		6.38486		8.42631		6.09942		9.26058
	5.23218		8.45071		6.00141		7.42655		4.60517		6.5859
	6.41149		8.48235		8.30914		8.8701		4.62104		8.38023
	8.7201		9.50295		4.74667		6.02876		5.37898		3.91999
	4.42125		8.26729		8.09487		4.02535		6.31355		3.3322
	6.71998		8.39913		8.33902		7.04438		8.59134		4.50424
	5.32203		8.34055		8.61163		7.74552		4.15888		9.34697
	4.91852		8.15571		8.37581		6.87688		4.29865		5.39363
	5.71703		8.91881		9.37592		8.55101		3.53806		4.53045
	6.23363		9.05448		8.14902		7.78854		5.83364		3.51453
	7.36163		8.61323		4.8331		8.54216		3.3322		5.90591
	5.36035		8.52881		8.925		8.54869		4.80074		3.80221
	6.58036		7.98644		7.69403		7.95015		0.875469		4.45899
	8.75033		8.78569		8.10916		7.98725		6.18539		4.98086
	4.12066		8.7798		9.18186		8.60696		4.69684		5.13344
	5.8545		8.31366		6.50787		5.89495		5.09006		4.56435
	6.3956		8.16371		9.32802		6.94774		3.17805		4.1463
	5.99546		8.71893		8.43659		7.27017		8.40666		4.80729
	8.11229		8.8648		5.15213		7.00597		5.72228		4.54754
	5.93806		9.62747		9.1671		7.61164		5.54518		5.79788
	6.58258		9.10267		4.80074		8.69978		5.93806		5.42935
	8.72193		8.45617		6.22575		8.06665		5.89715		8.5048
	8.56636		8.1644		8.56865		7.48661		5.11439		5.40807
	8.02172		9.25646		6.13988		8.03864		5.87718		4.48639
	4.36182		8.26627		8.85629		8.42928		5.82895		4.47734
	5.68765		9.1007		4.94164		7.70922		7.47034		7.99887
	5.36035		9.42571		8.49976		6.6291		4.01096		7.86542
	7.01103		7.91892		9.04254		8.4727		4.20767		8.96924
	4.52179		9.60227		5.15675		8.4404		3.68888		4.20767
	6.98841		8.69658		8.19864		6.89972		4.26549		3.03495
	3.96651		9.01452		8.08653		8.40201		5.71439		3.98155
	8.43433		7.89058		8.29225		6.64066		6.74005		3.07269
	5.65459		8.26132		8.23536		8.56956		6.80328		5.78567
	9.40742		9.17906		5.76331		8.01275		4.91852		6.09402
	4.89485		8.65855		7.55883		8.19467		5.7091		3.85439
	7.38324		8.63636		5.49717		7.44682		2.48491		3.44042
	8.0973		8.59608		8.537		8.17707		6.1347		3.81991
	5.74044		9.32217		8.00048		8.35965		6.3889		4.08092
	5.86136		8.41308		6.90375		8.85287		5.41165		3.49043
	4.7808		8.36077		8.2015		7.8543		6.42972		8.05351
	4.71133		7.64435		7.217		8.02826		3.44042		6.32794
	3.96651		8.82538		8.97694		6.25075		5.09006		5.35281
	6.5892		8.24023		8.31366		8.82972		4.4403		5.44674
	6.25383		8.33135		5.93595		7.65728		6.21301		4.15888
	6.13123		8.63594		7.9818		8.41768		4.41159		3.51453
	8.02145		8.28561		7.56797		8.86796		5.93595		3.07269
	4.98634		8.71289		8.27812		8.86706		6.7372		4.81381
	6.71125		8.26338		4.70411		7.54285		6.47759		2.54945
	5.41876		7.89863		7.06168		8.74423		4.30946		5.21927
	6.07948		8.11325		4.42125		7.6516		4.52179		5.93595
	4.10759		8.28076		8.50171		8.02565		5.75827		5.58199
	4.25419		8.70377		9.30652		8.28137		5.02388		5.27402
	4.62889		7.58761		8.29024		7.98616		6.4128		6.65518
	5.17502		9.17897		5.03435		8.25468		5.78074		2.8679
	7.04368		8.90913		8.97856		7.11379		5.20181		8.25281
	7.43461		8.19135		8.17909		8.65855		1.72277		8.59593
	5.96922		8.72687		8.99069		7.5013		4.98086		4.03954
	5.76331		9.40775		8.29605		5.57595		5.67401		5.02388
	7.57497		8.60681		7.10266		8.51719		4.91852		4.64439
	7.80824		8.53117		8.0345		7.34006		4.4403		4.76046
	4.4403		8.82138		7.75036		8.03967		5.24913		3.78419
	6.18703		8.4378		8.0037		7.69658		5.45703		6.17711
	7.06442		8.4404		7.95718		7.68156		5.81711		3.56105
	6.43101		8.65354		8.88727		7.91688		3.80221		8.989
	5.29832		8.21522		5.64615		3.95124		6.41411		4.09434
	4.84576		8.57153		8.67262		8.19135		5.77579		4.65205
	4.4403		7.99591		8.02381		8.30202		4.32015		5.24913
	5.61167		8.38279		6.02683		6.66441		5.94856		6.11191
	8.67139		9.34829		5.26165		7.5981		3.51453		3.41444
	6.84247		8.86796		7.89118		8.39913		6.16036		4.85203
	6.9554		8.04302		5.64615		8.67986		4.84576		5.52306
	5.82895		8.03761		8.48781		7.35551		4.48639		8.32845
	4.74667		8.50819		8.36879		6.11014		4.85203		6.2114
	4.13357		8.57863		8.24654		6.49708		4.79414		4.62104
	4.49536		8.70986		8.80496		7.9425		5.54205		8.54013
	6.86443		8.80663		5.64332		6.22258		4.87672		9.35745
	7.95774		8.8605		7.4644		8.6365		6.17045		4.49536
	5.76582		9.02256		6.80062		7.34678		9.42028		4.40183
	6.374		8.31777		4.4403		9.17765		5.43285		6.41149
	6.32077		9.50319		8.85046		8.86909		4.94164		4.20767
	5.79545		8.78887		8.60608		7.96081		6.01908		8.92702
	3.64806		8.75728		8.04661		8.0912		5.09498		4.26549
	8.03087		8.55148		9.1577		7.98942		6.27965		3.24259
	7.22344		8.4742		8.99447		8.38041		4.88884		3.98155
	5.49059		8.3111		6.8661		7.54115		8.61367		7.0067
	5.28624		8.96944		8.01381		9.00984		4.55598		8.38334
	6.90695		8.74856		8.6464		7.21993		6.39693		4.80074
	5.30629		8.98218		8.2417		6.91175		5.46044		9.06961
	5.26992		8.97684		8.7092		8.45481		5.50696		5.29029
	7.38324		8.68325		8.49748		8.17436		4.09434		8.987
	3.96651		8.81237		8.01063		8.33135		2.66723		2.26176
	4.37198		8.63109		8.42262		8.48632		4.55598		7.6834
	3.51453		9.02853		7.61323		7.06987		4.7185		4.84576
	4.06732		8.40631		3.98155		8.47654		5.61459		4.58904
	8.88804		8.82232		7.50835		8.03606		4.55598		8.4802
	5.57897		3.56105		9.04961		8.33749		3.36038		4.49536
	5.04986		8.17324		8.42823		6.07764		5.04471		8.42262
	7.22461		6.85097		8.38608		5.63193		5.27811		4.90082
	5.62618		3.64806		8.02408		8.50025		6.20819		4.28772
	5.33368		9.01325		6.3956		8.21457		3.64806		3.30322
	5.45018		8.71394		5.67675		8.66616		5.09987		3.66868
	4.68951		8.28056		8.51863		8.1154		3.85439		8.38078
	7.31162		8.70324		7.99456		8.41998		4.18358		5.99546
	8.55426		8.20631		8.51959		8.77041		4.06732		4.15888
	7.95997		8.61744		8.39859		8.41609		5.64332		4.83945
	4.73268		8.87783		7.71137		7.94392		4.42125		3.95124
	6.51738		8.45753		9.0377		7.04089		4.98634		5.70378
	5.78074		8.33519		8.28279		7.67749		5.67949		5.23644
	7.23447		7.94364		6.07212		5.90591		4.41159		0.875469
	4.78749		9.16107		6.53029		8.11684		2.61007		5.1885
	7.11639		8.76618		8.53102		6.34634		5.90373		5.13344
	2.61007		8.11707		7.97191		7.45703		4.18358		2.99573
	6.99283		8.21782		7.92095		7.38374		6.01323		3.30322
	5.32593		7.61362		8.28803		7.82756		6.3808		9.83392
	6.6238		9.47786		4.95301		7.69001		8.70828		-0.223144
	3.93574		8.89157		6.42065		8.3589		3.88773		2.8679
	5.79301		8.69336		8.76168		7.45054		4.53903		4.52179
	6.3889		8.75602		8.66216		7.81149		3.41444		5.04986
	4.4682		8.68013		7.82052		6.98398		6.44381		1.56862
	5.21494		8.4298		7.57127		8.46666		5.98141		5.2062
	5.36784		8.88461		5.06006		8.23917		5.54205		3.53806
	9.22424		8.51767		8.08481		8.62105		6.57144		4.37198
	6.15528		8.80603		6.39959		6.41542		6.3393		3.88773
	6.96979		8.32826		8.43572		8.7047		4.1463		4.73268
	7.48751		9.75313		7.73333		8.4113		5.12871		4.54754
	4.28772		8.26421		8.88139		8.41733		4.13357		4.35157
	5.41521		9.14198		8.94804		7.83265		5.23644		4.77407
	5.81711		7.78655		8.68067		7.61402		4.35157		4.30946
	3.98155		8.79288		3.76584		7.43791		4.50424		4.80729
	6.32508		8.88072		8.9589		6.72959		5.40448		4.54754
	5.89495		9.77924		8.86943		6.99357		5.06512		4.73268
	5.45018		9.43259		9.37964		7.55716		6.33363		8.4235
	6.99723		8.23557		4.53903		8.00956		4.4682		3.6055
	4.94734		8.34093		6.61954		5.47395		2.95491		4.10759
	3.44042		8.50009		8.42788		8.69175		6.64379		4.50424
	6.22099		8.59148		8.3417		6.61954		6.27815		5.76331
	6.84673		9.35766		9.03599		4.90676		5.04986		4.51305
	5.4773		8.68054		6.30919		8.67945		5.65459		9.21775
	6.39292		7.39854		7.93164		8.42174		4.27667		4.90676
	3.07269		8.29764		8.61932		8.10144		6.14847		4.55598
	5.93171		8.25884		7.71065		8.18824		4.08092		8.13412
	4.81381		8.7483		8.70018		7.6933		4.35157		6.72191
	7.08473		7.97852		8.3044		8.18334		8.05325		3.81991
	7.92299		9.05849		8.84217		8.35514		4.1463		4.06732
	4.97535		8.66299		7.29166		1.97408		5.8499		6.74288
	7.52359		9.1287		8.67386		2.77259		5.6058		2.7213
	6.85267		8.20369		7.83897		8.92543		4.09434		4.43082
	4.87672		8.47487		3.44042		6.78717		5.99546		4.54754
	6.6034		8.38114		9.04923		7.65879		4.85203		8.16781
	7.04578		8.9888		8.40916		7.53134		5.29431		7.2046
	7.22344		8.61483		8.51639		8.1644		6.00141		4.76046
	5.17953		9.0357		8.44591		8.05959		7.03174		5.50044
	4.89485		7.96193		8.91215		7.86357		3.98155		4.35157
	9.20858		8.83101		5.21494		8.08481		5.81711		8.41821
	6.32364		9.53901		8.48103		8.48764		5.59099		4.36182
	5.30629		8.43015		7.48751		8.14995		4.86445		5.43982
	5.70645		6.27061		8.09218		7.54666		5.2575		4.18358
	4.88884		8.59697		7.7217		7.67006		3.38777		4.87061
	5.10958		8.60711		8.36227		7.14772		6.41673		4.20767
	6.55905		9.50331		8.75299		8.57032		7.40877		8.56697
	8.35439		8.65633		4.99721		8.62134		-0.223144		4.4682
	4.7397		8.08924		8.20675		6.75786		4.20767		5.25332
	5.78567		9.296		9.2924		7.05824		5.94437		5.04471
	6.4886		8.90999		8.43312		7.78987		7.70814		4.75359
	3.93574		9.4063		8.41627		6.50309		8.97218		4.78749
	6.7504		9.24393		7.7002		7.94704		6.00339		4.25419
	2.82138		8.67672		3.78419		8.30933		5.07016		3.17805
	5.82659		8.81878		7.91337		8.69202		4.58088		4.27667
	3.21084		9.38691		8.11037		9.90883		5.19739		4.20767
	8.10916		7.72877		6.5925		6.43999		5.0133		5.5326
	3.66868		8.18669		8.26791		8.51927		5.78074		8.46514
	8.20587		9.11814		6.44635		7.95662		6.32364		5.13344
	2.95491		8.13177		6.62804		8.42033		5.24913		4.99721
	2.99573		8.36879		9.10605		7.35756		7.05203		3.95124
	6.1671		9.14429		9.1511		7.72028		5.60874		8.644
	6.51264		8.76305		8.70324		8.20871		7.284		8.0069
	3.24259		9.18981		5.33754		8.70814		3.99636		6.59469
	7.73333		8.973		8.45447		8.67372		4.13357		5.90591
	3.17805		9.37171		4.44969		8.30301		4.81381		3.53806
	7.31695		3.99636		4.10759		7.99132		5.33754		4.97535
	7.78821		8.60403		5.87268		7.78456		6.39426		4.35157
	4.47734		8.89989		6.30335		7.24194		5.96922		4.01096
	6.25843		7.45888		7.26683		4.39198		2.8679		4.37198
	2.54945		7.9348		5.17502		7.78156		4.68951		3.30322
	7.83106		8.14625		7.96081		8.69256		4.27667		6.48738
	5.06006		8.88439		4.58088		8.38809		4.74667		2.34181
	5.24913		8.86243		8.23175		7.03527		4.74667		8.196
	6.39024		9.09129		4.57265		5.57291		3.66868		7.85244
	4.06732		8.9249		7.78722		6.59578		5.88165		6.77628
	4.90676		8.46447		9.31779		7.31162		6.07764		4.09434
	4.37198		8.48781		6.26606		6.34493		6.48616		8.67057
	5.84064		8.99735		8.75375		7.08807		2.95491		7.58599
	4.77407		8.68785		5.12871		7.9253		6.31355		3.51453
	7.95662		9.20617		8.99873		7.4256		7.23965		5.19739
	6.72575		8.86322		7.82852		8.19754		6.0249		8.07016
	2.77259		7.92675		3.64806		6.61633		4.96981		4.81381
	7.34884		8.01407		8.27364		7.85119		5.36035		4.56435
	6.31789		7.87367		8.46413		7.9686		5.38633		2.48491
	5.27402		7.99105		7.61835		7.69403		6.78536		3.76584
	8.02982		8.53338		8.14578		7.44961		4.90676		5.38266
	6.28563		8.96362		4.7185		7.75688		7.71851		4.76729
	5.97534		8.89355		8.98329		8.58642		5.87493		3.21084
	7.26571		8.66451		8.54962		6.78083		5.62906		8.39245
	3.70868		9.49094		8.7354		8.08456		5.45703		5.19296
	6.79705		8.09169		6.51738		8.3673		5.29029		4.33073
	4.24276		9.26445		8.80387		5.96922		5.34901		4.2312
	4.30946		8.6235		8.6365		7.74898		7.5605		3.21084
	6.91413		8.51463		5.80754		6.53959		4.89485		5.31812
	2.48491		8.44591		8.54294		4.30946		4.63667		4.85826
	5.41876		10.1131		5.0133		8.64499		5.16593		4.87061
	4.65205		9.72665		4.8828		8.55549		2.91235		3.627
	8.75866		9.3375		8.41023		8.12326		5.37898		3.49043
	5.7275		8.40845		8.15892		6.82089		5.98343		5.56987
	8.08333		8.89333		9.0846		8.69845		3.93574		7.9924
	7.11053		7.85119		8.11229		8.94627		5.34901		4.24276
	4.7808		8.53668		6.77171		8.128		3.36038		4.1957
	6.12249		8.63466		7.78289		8.90044		5.10473		8.70709
	5.5102		8.49911		8.44385		7.57743		4.08092		6.01518
	6.67456		9.27919		5.11919		7.76879		0.470004		5.53576
	3.70868		8.39967		5.28624		7.54115		4.96981		8.40738
	6.05162		8.12184		8.32729		8.30202		5.28219		4.21951
	9.52748		8.62191		5.02388		8.48368		6.74382		4.91852
	5.90373		7.37726		8.1993		8.43155		4.13357		6.09582
	5.91674		8.58955		8.19578		8.54325		8.83568		5.79057
	6.70833		9.5914		8.39063		8.38827		6.9181		5.13815
	4.44969		7.89088		4.26549		7.87641		5.42935		5.76832
	4.51305		8.84182		8.3736		7.83043		4.54754		8.68176
	5.27402		8.80675		8.32787		7.63627		4.96424		4.85203
	6.77171		9.1671		8.18222		6.69555		6.49103		5.17048
	4.95864		8.27303		7.6749		9.21361		3.51453		4.88884
	4.65966		8.61483		3.38777		8.7497		4.33073		8.11588
	5.57897		8.98188		8.59756		8.60769		5.12396		3.3322
	5.84759		8.93517		5.56987		8.27221		5.81473		4.74667
	3.21084		9.04093		7.43603		8.00637		5.56068		3.96651
	4.03954		7.84714		7.04647		7.97384		4.7397		4.21951
	8.55225		8.54854		7.9122		6.05912		6.13988		7.99995
	2.91235		7.94137		5.80754		8.14648		6.87026		2.7213
	5.6175		8.7292		8.79942		8.73114		3.78419		3.99636
	5.19739		8.74602		7.97632		8.24065		6.18867		2.61007
	2.26176		9.2544		8.53982		6.7315		4.4682		7.20934
	7.29329		8.58238		7.70346		8.39444		4.35157		4.08092
	4.98634		9.27508		5.71703		8.14601		4.7808		3.85439
	8.27507		8.59992		9.56549		6.92284		6.27061		4.26549
	6.04406		8.36264		5.07016		8.23727		5.31812		3.27336
	6.70147		9.24979		5.14283		7.6033		5.12396		4.51305
	7.63356		8.6789		8.42701		6.32221		7.0651		4.24276
	7.04578		8.80327		8.16143		8.43936		4.83945		4.88884
	3.99636		8.74334		8.46278		7.43414		5.89715		4.18358
	4.91265		3.76584		9.0636		8.4621		4.42125		5.82186
	4.73268		8.73784		5.77331		8.35194		3.6055		4.76046
	6.82089		8.29824		8.21997		4.25419		4.35157		5.05497
	6.05912		9.72364		8.03838		7.90426		3.99636		8.29784
	6.91254		8.71368		4.49536		7.35602		3.8373		4.91852
	6.40622		8.49339		7.49421		8.28096		6.45015		3.99636
	3.80221		7.97219		9.18391		6.48004		6.84503		5.91458
	3.07269		9.00356		8.40702		8.32477		6.44762		4.1463
	2.26176		8.49175		6.61847		8.20369		4.17131		4.55598
	5.45361		7.89566		8.92404		9.02526		4.10759		9.13579
	6.28264		8.12634		3.80221		6.62804		4.25419		4.6747
	4.81381		8.65619		7.74379		8.67262		3.03495		4.4403
	5.12871		9.59179		8.15708		7.52402		4.85826		6.66032
	0.470004		8.4737		4.62104		7.55925		5.17048		4.76729
	7.18781		8.47236		3.27336		4.05352		5.52625		4.87672
	5.21927		8.75046		6.13643		8.61192		4.8828		5.97534
	8.99099		8.86616		7.59649		8.57998		8.79009		5.03955
	2.26176		9.40294		9.08831		7.56631		4.84576		6.02876
	3.80221		8.91323		8.12112		7.04368		3.66868		4.91265
	5.91889		8.92479		8.7569		8.18133		6.41149		9.35385
	8.62479		8.87738		9.40663		6.94851		4.69684		5.53576
	4.80729		8.76142		8.4747		8.69618		5.14283		8.72115
	5.30231		9.21616		4.44969		9.19616		3.88773		4.78749
	5.55451		8.17864		8.08333		7.87762		5.17953		5.2062
	6.91175		8.36358		6.75227		7.80368		5.72489		3.24259
	8.38535		8.38553		8.21609		7.49643		3.64806		5.19739
	6.18867		8.36246		8.28964		7.83233		6.50309		9.79363
	7.62852		9.13854		8.16006		7.75242		5.71703		5.7091
	5.53576		8.9868		7.84432		7.99024		6.55336		4.29865
	4.80729		8.7709		8.30063		5.98343		2.54945		4.08092
	7.14204		8.27873		8.64499		8.72985		6.47142		4.53045
	4.47734		8.46058		2.17475		6.09942		5.2575		3.14415
	3.30322		9.08568		8.10046		5.81949		4.76729		4.86445
	4.38203		8.28904		3.30322		8.21392		5.77579		4.78749
	5.94647		8.45088		8.94835		7.86603		3.78419		7.82628
	5.21058		8.28258		6.52796		8.60006		6.91095		3.8373
	7.63279		8.7608		6.33079		9.02872		4.4682		0.875469
	6.59905		8.85309		8.89607		8.04225		5.98545		4.2312
	6.23832		8.14113		7.71065		7.97136		4.95864		6.80328
	6.69654		7.29546		8.07838		8.6718		6.22575		4.03954
	5.63764		8.4378		8.88494		8.72375		6.67456		4.52179
	5.68222		8.52055		8.04994		7.55045		5.78321		8.10796
	7.63434		8.74894		9.28463		8.34835		5.89935		3.10906
	2.91235		9.4552		8.45105		8.29565		4.64439		4.75359
	7.38275		7.11119		7.94364		7.81214		3.30322		4.02535
	6.06285		8.41591		3.07269		8.50981		2.17475		5.79301
	6.30189		8.88892		8.76168		8.47086		6.71901		6.48372
	5.76832		8.48467		5.51665		8.27058		5.6233		4.47734
	4.15888		8.21241		7.85523		7.88035		3.85439		4.38203
	4.80729		8.5891		8.53527		8.33038		4.8331		4.98634
	6.91413		8.456		8.04866		5.78812		4.29865		4.20767
	6.25843		8.79966		8.30063		8.65702		7.4598		9.6322
	7.11704		8.70867		5.36411		7.82533		4.2312		4.08092
	5.82423		8.29265		8.58896		7.80499		5.48397		5.52943
	5.43982		8.69671		4.17131		8.27119		5.49717		5.30629
	8.82102		9.59848		8.41733		7.26123		5.47059		5.23644
	5.97126		8.0694		4.53045		7.97274		3.98155		6.04973
	6.48004		8.98439		3.88773		7.86726		6.78807		4.99179
	6.46147		8.92999		8.31816		5.96717		3.66868		4.01096
	4.1957		8.19024		5.95272		7.5136		5.07517		3.49043
	5.52306		8.6222		8.5538		8.67741		4.80074		6.39292
	6.71028		8.88925		8.58463		8.26729		6.35054		4.27667
	6.46521		8.06438		8.36693		8.32942		4.1463		3.49043
	5.97939		8.00876		6.77445		7.5437		6.4825		3.8712
	4.43082		8.56087		8.36414		7.31108		5.7301		5.49717
	8.09462		8.37378		8.57138		8.45736		2.82138		9.5105
	6.65415		8.35871		5.21494		4.80729		3.76584		3.96651
	5.09498		8.986		9.21162		7.0753		6.43743		4.45899
	3.53806		8.78838		5.17953		8.24549		5.90154		4.80074
	9.40109		8.58791		8.21306		5.93595		6.3956		3.74715
	6.44381		8.54122		9.06785		7.18599		6.09582		8.54993
	7.5993		8.28642		8.65772		7.71316		6.69654		4.25419
	1.8563		8.61613		8.2379		7.81698		5.12871		6.06099
	2.7213		9.02757		8.27446		7.17319		4.83945		5.12871
	5.29832		9.58251		5.94437		7.78156		4.28772		8.46868
	5.94856		9.28634		6.14161		8.08234		2.99573		6.11898
	4.15888		8.69725		9.3633		7.63472		5.87268		2.34181
	3.88773		9.49576		8.48846		8.46582		8.22491		8.53244
	4.06732		8.38972		6.84076		8.0679		5.78074		4.64439
	8.40791		8.78765		8.54838		8.10531		6.13643		6.01127
	7.71423		8.66479		8.99497		6.90455		8.27099		4.2312
	6.30628		8.56575		8.90859		3.46574		4.82028		3.49043
	4.3412		8.52484		8.91516		7.3233		4.24276		4.97535
	8.80219		8.44986		9.04744		7.13887		4.79414		3.64806
	4.18358		8.63679		7.65425		8.49323		3.3322		2.48491
	3.64806		8.42893		8.94429		7.85678		6.04216		3.36038
	5.15213		8.1374		7.74032		7.72312		1.38629		3.3322
	6.53029		8.58791		8.53997		8.37894		5.26579		3.90399
	4.7185		8.60315		8.41503		7.76642		4.61314		6.02102
	7.17196		8.60915		4.93015		7.5659		5.86136		8.38334
	4.28772		9.12574		7.1293		8.0069		5.40807		5.9548
	6.02683		8.25052		8.93874		7.68193		5.43982		5.585
	7.2818		7.79975		7.76404		9.21688		9.00297		4.94734
	5.13344		8.50674		8.05427		8.30341		5.39363		7.82756
	5.82659		8.3164		8.54419		8.8908		1.97408		4.82671
	5.17502		8.16143		4.02535		8.09779		5.73786		3.627
	2.17475		8.74576		8.15179		7.88126		5.69575		4.55598
	5.86817		9.01656		8.77857		8.30519		6.34634		4.52179
	7.19143		9.12713		6.51501		8.01089		4.09434		8.31444
	5.82659		8.93369		5.25332		8.85161		3.8712		4.12066
	4.71133		8.83124		7.94478		8.17909		4.43082		8.21457
	7.46577		8.66465		8.84747		8.18513		4.94164		3.99636
	6.60014		8.34854		6.79347		7.07395		4.79414		5.38998
	4.06732		8.18936		5.59099		7.95774		7.13887		5.18403
	5.35281		9.00729		8.19024		7.79416		3.14415		5.00797
	4.80729		7.88156		8.37674		8.46058		5.26165		4.05352
	3.17805		8.17594		7.79119		8.69148		6.93693		3.90399
	6.34634		8.88494		1.56862		5.30629		7.10988		6.97279
	4.17131		8.3298		8.29625		7.72135		3.44042		4.58088
	5.11439		7.9661		5.48064		8.28218		5.54205		3.8712
	3.30322		8.14276		8.61599		8.21023		3.3322		5.34138
	4.35157		7.92472		8.05681		8.3542		8.72726		3.3322
	3.95124		8.85766		9.03856		8.63551		3.88773		4.01096
	3.99636		6.84418		5.38633		8.85355		5.97534		4.55598
	4.27667		9.0415		7.78655		8.91333		5.94647		6.63542
	5.95272		8.80855		4.36182		8.15018		5.6204		5.48064
	5.08016		8.64611		5.42583		8.63622		4.4682		8.24612
	6.37264		8.98188		4.1463		6.79705		6.2691		4.80074
	5.31812		8.74232		9.11664		8.66147		5.17953		3.30322
	7.03103		8.89771		8.55734		5.49388		4.28772		3.8373
	4.68213		8.92436		8.82949		8.24654		6.44762		6.34914
	3.10906		8.67112		8.36077		8.49878		7.15211		3.24259
	6.3956		8.72933		8.40702		8.97735		5.18403		4.83945
	5.94647		8.06665		8.50155		6.587		5.88165		5.82423
	6.66237		9.01189		4.54754		7.23273		3.95124		4.59714
	8.17797		9.06258		8.20391		7.38424		5.39363		6.00141
	6.54074		8.19555		9.15415		7.31748		4.3412		5.09498
	3.93574		8.52437		8.49503		8.44126		5.71175		3.66868
	6.15188		8.48616		8.42139		7.89447		3.3322		5.40087
	4.62889		9.33835		7.8574		7.43932		2.66723		3.3322
	4.64439		7.98262		8.76954		8.84148		6.96224		4.15888
	8.324		8.89431		8.11779		6.60773		5.6685		3.03495
	4.7808		9.3847		8.19555		8.83591		4.45899		3.64806
	6.32077		8.10603		8.31581		6.19032		7.91775		5.51665
	6.65415		8.70828		7.19143		8.77004		4.63667		8.85149
	6.47759		8.90837		6.80239		6.56244		5.34138		3.7281
	4.45899		9.64503		7.86019		8.03631		4.64439		8.54247
	4.72562		9.38544		9.4398		6.93225		8.5069		4.64439
	6.37264		9.04622		5.5999		8.30003		6.31065		5.38633
	6.87523		8.26668		8.11636		7.08473		1.38629		4.15888
	5.42935		8.88372		8.51367		7.36366		5.7275		4.80074
	5.40807		8.51093		8.46935		7.29275		4.50424		3.96651
	6.50668		7.9348		8.50819		7.46394		4.02535		5.45018
	3.49043		8.26832		8.63962		7.6009		6.52092		4.82671
	3.46574		8.0734		5.43982		8.38572		5.91025		3.36038
	7.47034		8.42753		7.18781		7.84118		6.62167		3.46574
	5.96512		7.84745		7.82212		6.78807		4.17131		5.78074
	5.65739		8.65535		7.69111		8.58238		3.95124		4.57265
	8.31091		7.90219		8.04943		7.91162		5.13344		0.875469
	3.80221		8.66244		9.51506		7.52575		6.00734		5.48397
	3.99636		7.6045		8.87481		7.85678		2.82138		5.02388
	5.54205		8.15525		8.01935		8.28964		5.90591		4.53903
	4.47734		6.91095		4.91265		8.89366		5.76832		3.44042
	4.79414		8.21738		6.05538		8.16371		3.56105		5.07016
	8.3298		8.74372		9.00021		7.65463		3.95124		0.470004
	6.82176		8.85561		8.73809		6.95616		5.32593		5.48064
	8.82432		9.07749		3.3322		5.61167		4.73268		5.49059
	5.588		8.85549		8.74843		6.61633		3.80221		8.63565
	4.06732		7.41457		8.62062		8.00129		4.75359		4.2312
	3.8373		8.59593		7.37676		7.67971		6.00339		4.90082
	4.57265		9.50534		7.20162		7.93909		5.14749		3.76584
	8.02434		9.24354		6.48494		7.24308		7.52316		7.72312
	6.88674		8.24591		5.03435		8.58343		4.98634		3.627
	8.63394		9.44589		8.6674		8.33673		4.06732		7.74621
	5.87493		8.69778		6.30042		7.71137		5.13815		8.49976
	7.97852		8.36432		5.99146		8.3919		5.32593		8.81736
	7.7637		9.07823		8.43832		7.65425		3.78419		4.24276
	5.34138		8.19666		5.75321		7.05824		8.32011		3.68888
	4.30946		8.55457		9.15913		8.49862		6.38755		4.01096
	7.69549		9.12304		8.87816		8.3712		5.51343		4.02535
	7.80139		8.50431		8.20084		7.15586		1.38629		4.21951
	6.72191		8.80207		7.93566		7.71137		5.6204		4.6747
	8.55225		8.38243		9.00356		7.56465		5.25332		5.56375
	4.09434		8.92692		6.61633		8.40147		1.56862		8.14902
	9.05045		9.28404		8.13106		8.99129		5.60874		3.58352
	6.32651		8.79833		4.85203		6.20173		6.12074		5.21927
	6.57925		8.70999		8.47537		8.8046		6.83131		5.78074
	8.35024		8.01063		5.14749		7.5868		6.55791		6.54994
	7.30465		9.07273		6.0093		8.55749		8.78263		5.77579
	3.03495		9.62995		8.23175		8.02722		5.6175		5.65739
	6.38486		9.62006		7.96527		7.22926		5.83598		4.03954
	5.53891		8.56819		7.92008		8.46278		5.36784		4.24276
	6.07397		9.11092		8.24968		8.22598		5.45703		3.85439
	6.52679		8.82867		5.89275		8.72271		5.38633		5.05497
	7.17931		7.66781		5.46722		6.95464		4.60517		5.14283
	5.49388		8.67904		6.881		9.08233		4.41159		5.26579
	7.47715		9.36234		8.78042		6.48981		5.45361		4.26549
	3.6055		8.2204		4.52179		8.42893		3.90399		5.16593
	4.21951		8.74283		8.31326		7.72559		6.5465		6.01908
	4.37198		8.6268		5.38998		8.47119		3.96651		4.25419
	4.29865		8.70364		8.87246		8.18913		3.58352		8.64104
	5.05497		8.04943		7.71886		7.82373		3.3322		4.6747
	5.2062		7.73158		8.53291		8.20849		4.65966		4.2312
	5.46044		8.64976		4.55598		7.41409		3.70868		3.38777
	5.75827		6.32651		4.70411		7.36315		5.08016		4.33073
	8.56087		7.58599		7.57825		8.56331		6.88018		7.70238
	5.60286		7.39903		8.13552		8.16212		5.2575		4.82028
	6.85013		9.05672		8.39787		4.09434		4.90082		8.64471
	4.32015		8.60667		8.53039		7.38771		7.0067		3.70868
	2.95491		8.60623		8.17256		7.7049		4.17131		3.81991
	5.74556		8.43746		4.58088		8.05579		4.40183		6.68561
	8.27589		7.89685		5.52625		8.31366		4.53045		3.98155
	4.51305		8.91913		7.97302		8.17886		6.25843		4.81381
	4.95864		8.86548		8.0679		8.75778		6.18703		4.15888
	5.52306		7.41938		5.07517		9.01199		4.90082		7.69403
	8.2478		9.05495		5.74812		8.21241		4.1463		4.88884
	6.7504		8.49601		6.35333		8.11444		5.54205		5.45018
	3.58352		8.42438		8.37637		8.27221		4.18358		4.18358
	5.0026		8.75942		4.53903		7.13186		2.66723		7.78089
	5.02388		8.42385		6.83905		8.13365		3.38777		3.88773
	8.10579		8.18646		8.17369		7.90219		4.57265		4.61314
	1.97408		8.77512		5.88388		8.8289		5.94017		3.78419
	3.21084		9.05542		7.69621		8.06136		4.79414		8.33192
	9.03884		8.32497		8.19467		8.72453		5.45018		5.12396
	5.97737		8.40326		7.50219		8.36823		3.46574		5.20181
	5.12871		8.59962		8.76067		8.26832		5.40087		4.70411
	5.18403		8.7051		4.55598		7.3672		5.03955		4.98634
	6.10836		9.03722		8.84575		7.53391		8.45634		4.35157
	4.4403		6.8552		8.41325		7.98616		6.53379		4.50424
	6.99357		8.69484		5.45361		5.14283		6.2001		8.16531
	8.11922		8.98178		4.95864		9.02256		3.74715		5.77331
	8.23642		8.0085		8.91624		8.0739		5.56068		4.03954
	3.80221		8.59977		8.41927		9.09444		5.11439		3.99636
	5.61167		9.45407		9.11445		8.76941		2.99573		4.68213
	5.75321		8.66423		7.68045		7.54412		4.52179		4.81381
	7.55799		8.61003		8.56773		7.63666		4.79414		6.07397
	4.94734		8.69765		4.50424		8.39769		6.30335		4.17131
	4.59714		6.51974		8.03606		7.09937		5.44328		3.51453
	5.88832		8.27303		4.76729		8.21911		5.92959		5.67949
	7.74898		8.15594		8.55872		6.55905		5.25332		3.44042
	6.72671		7.97274		8.41201		8.63409		5.20181		8.3589
	6.0249		8.67386		8.6235		7.88908		5.94856		5.12396
	6.05912		8.08135		6.9408		8.3619		4.88884		4.4682
	6.73815		7.84526		8.37545		7.0603		6.126		8.92372
	1.97408		7.70958		5.67401		8.47887		4.93591		3.51453
	4.01096		6.4323		6.82785		8.65186		2.82138		9.70396
	6.41411		9.33348		5.77331		8.30341		4.54754		3.30322
	4.99179		9.07347		5.15213		7.03738		8.14694		5.31419
	5.16593		8.92543		6.96376		6.29748		5.13815		5.69036
	3.10906		7.94165		6.06099		5.52625		1.56862		3.49043
	6.40092		8.81463		8.37545		5.95272		2.99573		6.10122
	1.16315		8.57516		8.22962		8.36002		5.16135		2.61007
	5.34901		8.05554		8.83113		8.23578		3.74715		5.67401
	5.25332		8.89519		8.55641		7.03386		2.66723		3.76584
	6.05162		9.06258		8.02643		2.54945		4.37198		4.60517
	3.07269		8.96495		7.93365		8.86356		6.48738		8.56377
	2.34181		8.38972		8.22855		6.93537		4.50424		5.38633
	5.11439		8.17256		6.70637		8.54807		6.80417		5.06006
	7.11769		9.11919		7.85957		8.24381		6.01908		5.82186
	8.15226		7.50571		4.47734		8.02748		6.74571		4.15888
	4.51305		9.08768		7.98016		8.87033		5.54518		4.97535
	4.44969		8.99417		8.456		6.7781		4.92435		3.98155
	5.36035		7.86357		8.13529		8.59015		7.67192		3.66868
	3.78419		7.78589		5.30629		8.31562		4.50424		3.70868
	6.74759		8.36507		4.88884		5.64332		7.08807		3.17805
	6.00537		9.7548		4.30946		8.04405		6.70245		4.03954
	2.77259		8.5894		8.85891		3.68888		5.86363		4.47734
	4.1463		9.66355		8.35646		7.93709		8.34986		4.87061
	5.7091		7.63666		8.53997		8.1564		5.09498		3.68888
	6.07948		8.22598		9.26574		7.4213		3.93574		8.28803
	6.4049		9.03608		8.16712		7.82469		5.30231		3.56105
	6.7334		8.60535		7.61362		6.87441		6.56583		4.44969
	6.16542		6.70539		7.7935		8.35759		6.89892		4.83945
	4.94164		9.07227		8.53007		8.13927		4.62889		5.07016
	5.86363		8.62752		5.31419		8.90392		4.28772		4.58088
	5.45703		9.56701		8.94418		7.27184		4.1463		7.11379
	3.44042		9.42816		6.91254		8.59401		4.32015		8.23833
	6.15867		9.16115		8.06589		8.468		4.62104		0.470004
	4.26549		9.02594		5.48064		7.6037		6.39826		4.40183
	5.39726		8.2501		4.92435		8.48368		3.10906		4.21951
	5.72228		7.87793		8.658		8.34436		6.587		3.38777
	7.66744		7.75105		8.00743		8.49224		4.91852		3.21084
	2.26176		8.34265		7.77486		8.83533		4.81381		4.06732
	4.65205		9.03846		4.6747		8.77919		4.27667		9.296
	5.69036		8.2578		8.39534		8.34474		4.41159		8.9884
	6.07764		9.6331		8.38572		7.66893		2.48491		2.26176
	6.17545		7.76166		4.21951		8.33538		5.15213		4.4403
	4.54754		9.09874		8.58163		5.90373		6.08677		3.10906
	5.7275		8.42525		8.38316		8.20762		4.03954		3.70868
	5.7091		8.89869		8.50948		6.0904		4.81381		4.86445
	6.296		8.77882		8.74066		9.15322		4.41159		5.78321
	4.77407		9.13674		8.80986		8.98128		5.57897		4.87061
	3.41444		8.10627		9.35017		6.45142		4.41159		4.94164
	8.63508		7.96527		7.93394		7.4644		4.70411		5.14283
	5.97126		8.53762		4.44969		8.28177		3.88773		4.90082
	6.29157		8.23833		8.66409		8.31542		4.58088		4.52179
	7.95774		9.07172		6.32651		8.60842		6.06843		4.43082
	8.62307		7.94336		8.17594		7.60728		4.65966		4.38203
	6.36165		8.2004		7.81116		8.55534		5.82659		6.87275
	4.65966		8.39335		8.80771		8.07689		5.35281		5.59694
	2.26176		9.29233		8.50415		6.78627		3.8373		5.43634
	3.17805		8.89585		8.08678		7.89268		4.85203		0.470004
	4.96424		8.57092		5.05497		8.49388		3.30322		8.08506
	6.5465		8.73037		8.42595		7.50571		4.48639		6.71805
	4.09434		8.75514		8.81498		7.56091		4.42125		6.64587
	3.85439		8.77252		8.51109		7.81214		4.68213		3.3322
	4.13357		8.94742		4.79414		7.94336		5.17953		8.23111
	6.30773		8.59888		9.7892		7.31748		4.89485		3.66868
	3.64806		9.12904		5.29029		8.71932		5.15675		5.09498
	5.93384		8.21327		9.59397		8.63166		6.35193		4.84576
	4.95301		9.40492		6.11722		8.13035		4.93015		2.17475
	6.9943		8.46951		4.05352		8.74474		5.10473		3.6055
	4.73268		8.34664		8.15892		4.48639		3.96651		5.16135
	2.77259		9.35385		4.18358		8.31562		6.53727		3.64806
	5.78567		7.40974		5.62618		5.6175		6.59687		4.1957
	6.18867		6.87358		9.02661		8.20893		4.54754		6.5692
	4.3412		7.72559		7.81181		7.2601		4.59714		6.374
	5.18403		8.44729		3.58352		8.02303		5.54518		5.73786
	5.17502		8.2074		4.69684		8.01195		5.63764		5.65179
	6.42065		9.2255		7.61559		8.71184		4.35157		4.2312
	4.92435		8.52087		8.73282		6.53495		5.94227		7.56755
	8.72907		8.55333		5.57595		8.29445		3.64806		2.99573
	9.17002		8.63009		4.62889		5.27811		7.30034		5.56068
	5.84528		8.72817		6.64483		7.42655		4.08092		4.65966
	3.85439		7.99186		7.93078		7.11834		6.46894		7.93709
	6.64066		8.8454		5.24069		8.525		4.77407		5.60874
	5.28219		9.18899		7.20042		7.82341		4.27667		3.8373
	5.21927		8.95385		6.41804		8.36376		4.47734		3.68888
	6.34212		7.68119		8.82668		7.74205		5.61459		8.69497
	4.71133		8.3111		8.56087		9.28574		3.21084		8.34436
	4.82671		7.95297		3.14415		8.27894		5.49388		4.05352
	5.37898		8.01645		8.63024		7.7153		5.47059		8.69537
	4.79414		6.73815		9.20432		6.81564		5.88832		4.1463
	3.6055		8.28157		8.60006		7.97219		5.61459		4.59714
	6.09942		10.0042		8.29824		4.05352		8.87559		9.28031
	6.67759		8.82644		7.57127		3.53806		5.66018		7.0854
	5.69036		8.838		5.52943		8.42718		4.69684		7.45333
	6.23832		8.38772		7.96804		8.16803		4.02535		7.76234
	3.64806		9.36316		8.99248		7.23389		4.77407		2.77259
	5.35281		8.69457		8.46126		8.14206		6.43101		3.49043
	7.06783		8.81141		8.79628		6.90294		5.89495		5.66573
	3.8373		8.11731		8.9114		7.55716		8.57274		3.53806
	4.24276		8.61729		8.08629		7.25389		8.55626		4.62104
	6.20658		8.1628		8.46362		6.58479		5.35659		3.93574
	4.86445		8.8202		6.54765		7.49243		6.99503		3.76584
	4.99721		8.20609		7.55632		7.73228		6.90615		3.21084
	4.92435		8.00797		4.21951		7.54327		4.75359		2.91235
	4.79414		9.53439		7.87944		7.97714		5.89495		6.2691
	4.29865		8.19489		8.98299		8.31268		6.14333		6.26302
	5.0133		8.36395		4.93591		7.50923		4.7808		4.08092
	7.15274		8.64005		7.68818		5.8861		6.79077		4.48639
	7.9408		8.80663		4.71133		7.89297		4.82671		4.48639
	5.36411		8.08875		8.27323		7.29546		4.48639		5.5326
	3.56105		8.21997		6.35472		8.30894		5.43982		4.35157
	6.60014		8.68758		9.32367		7.87032		4.61314		4.47734
	8.56469		7.73123		6.27815		8.17324		5.43634		4.87672
	6.0249		7.40099		2.54945		7.00234		5.63479		4.7185
	4.17131		8.26359		3.627		8.03268		6.19032		5.89495
	5.5326		8.23345		8.43451		8.23854		3.6055		3.80221
	7.48706		8.19489		4.58904		7.13186		3.21084		4.90676
	6.23206		9.63884		7.2807		4.64439		4.81381		4.75359
	4.45899		8.9736		7.80661		8.78422		3.85439		6.00734
	6.35054		8.37305		9.59036		8.21717		4.41159		3.58352
	2.48491		8.65186		5.56682		7.17503		7.14393		6.296
	5.83364		9.2117		4.93015		7.40001		3.38777		5.62618
	6.13643		8.42402		8.66064		8.15018		3.46574		8.9859
	4.15888		9.38597		9.14103		8.47169		5.20181		3.6055
	8.61003		8.85697		5.58199		7.97824		4.41159		4.76729
	3.38777		8.7782		8.31894		7.44635		5.36035		4.98086
	6.94851		8.50139		8.08358		4.94164		4.8331		3.80221
	4.88884		8.11277		2.7213		8.89069		5.90373		4.58904
	2.26176		9.22747		7.99186		8.64358		5.02388		4.15888
	5.02913		8.25198		3.8712		8.64696		6.36303		4.15888
	7.11119		8.02355		8.36264		8.33385		6.126		4.03954
	6.37264		8.449		3.66868		7.53262		4.90082		5.55141
	4.1463		9.22889		7.94959		8.82679		6.12425		8.45566
	-0.223144		8.45105		8.05147		8.55071		6.64898		4.56435
	4.62889		7.98589		8.46362		7.54285		5.16593		3.44042
	7.5977		8.05427		9.05158		7.69984		6.42325		4.79414
	4.02535		8.92989		6.26606		7.09407		5.49059		4.4403
	6.06843		9.8298		4.36182		8.0077		5.92104		5.39726
	3.17805		9.3847		6.46147		4.38203		6.17877		4.62104
	5.49717		9.34305		7.92732		7.02678		8.74995		3.27336
	5.45361		9.2762		5.75321		7.3233		3.8373		3.81991
	7.75996		8.74729		8.51991		8.11013		6.31644		5.04986
	5.5102		2.07944		8.35307		7.25389		5.33368		4.51305
	8.3699		9.13424		7.77888		8.34911		3.7281		3.88773
	4.43082		8.24759		8.32922		7.3882		3.7281		7.84682
	5.17502		8.48302		9.0358		7.72771		5.33368		5.45703
	6.97279		9.35281		7.8355		6.58147		6.32364		4.40183
	6.37537		7.87702		8.24591		8.08456		6.51026		8.6485
	4.49536		8.69121		8.91042		4.39198		4.7808		8.10119
	5.11919		8.30697		8.78923		7.19444		7.23273		8.70814
	6.7093		8.62637		7.8574		8.13576		7.06783		3.17805
	4.50424		9.30193		4.74667		7.72206		4.02535		9.27298
	7.45426		9.57776		8.53511		8.12634		5.0026		4.56435
	4.58904		9.26967		5.43634		7.72912		4.30946		4.30946
	8.83358		8.73899		8.33346		7.16022		3.91999		4.78749
	9.0336		9.78109		4.06732		7.95886		5.45018		4.08092
	3.74715		9.05383		8.4675		7.47896		5.10473		5.79301
	6.93225		8.9075		8.41325		8.53196		4.35157		5.32203
	1.97408		7.3196		7.5993		8.24297		4.49536		4.45899
	3.7281		8.61425		7.87762		7.26291		4.09434		6.82089
	4.18358		8.43624		7.2117		7.82309		6.77537		6.76342
	6.69059		8.36283		9.06684		8.4454		2.82138		6.51974
	8.13388		9.23187		8.68135		8.24486		3.66868		3.90399
	4.21951		8.85663		6.04406		8.01381		6.1347		9.28016
	4.90082		4.1957		8.9886		8.74665		4.24276		5.17953
	8.66658		8.21349		6.96376		8.42771		6.25383		2.26176
	5.81711		6.93925		7.44495		7.88818		5.8861		4.35157
	6.37809		9.20263		6.47142		7.8755		5.28624		0.875469
	8.73976		7.94591		8.88161		4.64439		3.38777		9.56941
	7.26066		8.132		8.35288		6.89244		4.38203		4.90082
	1.56862		8.80484		8.4762		9.4042		5.23644		3.58352
	3.30322		9.18834		4.01096		8.12681		5.51986		8.04968
	5.11439		8.91387		8.6896		7.74344		3.85439		4.48639
	7.34265		8.65647		7.99051		7.19323		6.68561		4.1957
	5.24069		8.21782		8.38663		7.00452		6.04025		3.41444
	8.79797		8.56316		8.49764		8.28723		3.38777		5.87043
	5.29832		8.24905		8.90371		9.16098		5.22789		4.42125
	3.03495		8.30182		4.64439		7.98098		4.62104		7.86204
	5.96101		9.14086		7.32804		8.38279		5.87268		5.57897
	6.16542		8.45413		3.41444		6.57256		4.28772		4.05352
	6.23989		8.57365		5.20181		8.48235		6.03452		7.29329
	6.15018		8.40147		8.40416		8.63252		5.76832		8.72088
	7.41168		8.90588		8.38389		6.42454		3.27336		4.25419
	6.65105		8.80723		8.53307		7.67229		4.7185		3.627
	5.15213		9.01228		8.18802		7.72595		5.2575		6.14161
	3.53806		8.76142		7.88397		8.30835		6.37809		5.0186
	5.92746		8.56453		8.4191		8.23175		6.1671		3.51453
	6.45142		8.15892		8.6245		8.58627		4.85826		4.81381
	7.66068		9.58938		7.46256		8.70841		4.33073		3.49043
	4.75359		8.42543		8.02956		7.4078		5.86817		5.94647
	6.5859		8.90967		9.28656		8.22126		7.17012		5.24069
	5.87493		9.44367		9.63005		7.49376		5.69843		4.91852
	6.98546		8.33558		8.05883		8.44917		6.17545		4.61314
	6.32794		8.70722		8.41237		5.77827		2.8679		4.39198
	7.20816		8.8976		8.90631		7.93423		4.03954		8.3162
	5.70378		8.08924		5.80994		7.86204		5.97737		4.58088
	6.52679		7.94279		9.58713		7.64089		4.58904		3.85439
	5.02388		9.16618		6.86943		8.05401		4.55598		9.21958
	4.68951		7.85306		7.87914		8.658		6.45897		8.53149
	4.53903		8.53982		7.94676		7.51534		6.11545		3.10906
	6.67759		7.73718		8.34208		8.34569		5.50696		8.47903
	5.26579		8.28157		8.18713		8.60359		7.19323		3.7281
	6.19359		7.55087		5.18403		7.74898		4.36182		2.95491
	7.73368		8.23684		8.32438		7.81084		3.98155		3.64806
	4.44969		9.60885		7.49287		8.71263		1.16315		2.17475
	6.34353		8.81261		8.21717		7.69293		3.80221		4.1463
	6.49587		9.1205		7.84432		8.52421		4.3412		4.28772
	6.4886		9.3589		8.05934		8.00503		7.6432		3.8373
	5.97126		6.56357		8.55688		7.36417		5.0186		3.56105
	7.67675		9.57682		7.8317		7.71602		3.8373		5.67675
	5.04986		8.44968		8.68798		6.97054		4.51305		4.57265
	9.21122		9.08251		8.76455		7.66143		6.35888		4.29865
	5.21058		7.6355		8.13505		8.77425		6.40092		6.18539
	5.28219		8.5894		9.11858		8.59888		5.77579		2.17475
	6.04406		8.91881		6.25383		8.67358		7.59368		5.13815
	5.51343		9.32681		8.29345		8.4807		4.21951		9.15508
	5.70111		8.90869		8.50593		7.33067		4.76046		4.63667
	4.52179		9.17881		3.90399		8.0694		4.51305		3.53806
	6.99942		9.37721		6.72191		7.54285		5.8313		6.46646
	7.10792		9.1388		9.43406		6.14161		4.58088		8.8719
	5.36784		9.08885		6.40092		8.4762		3.38777		4.87061
	6.2886		8.44626		6.6995		8.20412		4.56435		5.12871
	5.67675		8.79676		8.33231		4.48639		4.99721		6.09762
	6.07397		9.70132		6.82958		8.31287		6.44762		7.77149
	8.26173		8.4762		5.23644		8.23217		3.53806		4.55598
	7.9078		8.4097		8.18869		8.37471		6.37537		5.36411
	8.59844		8.63821		7.89357		8.23217		5.03955		3.98155
	4.41159		9.18457		8.81391		9.08096		5.02388		3.41444
	5.56375		8.4767		8.93285		6.82089		4.3412		2.54945
	5.47059		8.81487		7.54877		7.74171		6.46646		3.8373
	6.30042		8.04917		8.11922		8.47035		0.470004		8.57335
	5.17048		8.71342		8.29685		7.16704		5.82659		4.8828
	6.24144		8.14462		8.36283		8.04713		3.78419		3.93574
	7.95071		8.33423		9.12339		7.6013		4.62104		4.29865
	6.9181		8.77413		6.85182		8.34759		4.76729		4.99179
	4.4682		9.53913		7.97879		8.1374		5.84064		5.43285
	7.90633		8.60755		6.98398		8.23154		4.86445		3.27336
	5.81234		8.6109		8.83043		8.39317		4.53903		4.77407
	6.41017		8.94105		8.23047		7.51447		3.8373		4.55598
	3.10906		8.41821		8.59178		7.81149		6.6291		3.27336
	5.16593		9.09291		7.38573		7.56714		5.86363		1.97408
	3.81991		9.2547		6.19848		2.48491		4.97535		2.77259
	4.85203		8.797		8.54247		7.93337		2.48491		5.5483
	5.09006		7.9597		8.87179		9.02295		6.05162		5.51343
	5.99546		7.34265		7.91921		9.20633		4.71133		3.10906
	4.36182		8.15685		5.09498		6.55905		3.70868		9.21441
	8.9143		9.07868		8.51639		7.11053		5.91458		4.32015
	4.29865		8.87122		5.07016		8.46598		5.46722		4.13357
	3.80221		8.73063		7.93222		4.21951		5.26992		4.69684
	7.20341		8.27487		8.7184		8.03993		3.96651		8.23663
	5.06512		8.76854		8.63991		8.75261		5.02913		4.41159
	3.7281		7.08137		8.4643		8.21544		4.66721		2.91235
	6.49466		8.67945		8.5035		7.17258		4.01096		7.73683
	8.75539		8.22791		8.64696		7.78322		5.66296		4.35157
	8.366		8.38736		9.00474		8.18824		5.38633		8.12041
	8.65633		7.77284		5.41521		8.9172		8.82268		4.15888
	4.1957		9.26808		6.02296		8.08061		2.54945		4.61314
	3.41444		8.54978		6.89081		7.84557		4.59714		5.585
	2.7213		9.56235		8.84862		8.33154		5.94647		4.80729
	4.17131		8.35514		8.64878		8.19776		6.05162		8.73912
	4.72562		8.63991		0.470004		6.63332		7.06305		6.07397
	6.99283		9.36069		7.97384		8.09974		6.68561		6.11545
	4.28772		9.03675		1.72277		7.09738		6.84247		4.3412
	8.55117		9.24199		8.4648		4.74667		5.63193		9.4363
	2.7213		8.55225		5.39363		7.28235		3.38777		4.90676
	5.68222		8.67262		9.35323		8.7121		4.1957		4.08092
	5.70378		9.09677		4.21951		8.11253		4.32015		7.80564
	3.8373		8.54931		9.21688		7.95381		6.4049		6.3808
	6.30628		8.15318		3.27336		8.76418		4.78749		4.74667
	4.30946		9.0673		7.87276		7.21111		3.27336		5.47395
	6.72094		8.12988		8.03528		7.86296		4.18358		3.8712
	6.42843		8.30182		9.23054		7.7991		6.72383		4.78749
	5.07016		8.24884		7.80106		8.34379		4.33073		4.15888
	5.4223		9.20802		8.27954		7.92414		2.8679		4.06732
	7.53775		9.11629		5.71703		8.1313		3.53806		4.38203
	6.17379		8.78887		7.7762		7.83803		7.64128		5.57897
	6.69059		8.27139		9.03856		8.05681		5.74812		5.12871
	6.42065		8.59371		9.32224		7.91484		3.90399		4.85826
	5.36411		8.31816		8.63394		8.55979		8.98969		4.52179
	8.31757		8.81688		9.18965		8.46041		4.55598		4.25419
	5.11919		8.07041		9.02786		6.65827		2.8679		4.58088
	5.04986		7.96249		4.37198		6.74571		4.18358		8.39516
	5.71703		8.38169		8.82515		8.07962		3.80221		3.99636
	6.51145		9.01957		4.18358		7.59287		8.39009		4.4682
	4.29865		8.49634		8.205		8.37212		6.7132		8.30815
	4.58904		8.39787		7.99376		6.46147		6.43615		4.79414
	5.63479		8.60886		7.78854		8.06991		7.10332		4.66721
	4.02535		8.65953		7.17319		8.54185		8.45003		8.50852
	5.02388		9.43054		5.89715		7.77654		5.32593		5.38633
	5.12396		8.65772		4.26549		8.02904		3.38777		8.37045
	5.33754		8.4531		7.92066		7.2685		5.43634		3.24259
	6.03261		8.79845		6.03069		7.01894		5.22359		4.54754
	4.21951		8.9731		8.22062		6.9943		4.24276		8.07564
	5.40087		8.09511		7.79185		3.21084		7.92732		6.38755
	5.24069		8.52055		8.60109		8.01882		3.66868		8.49585
	5.37528		7.93852		6.30042		8.11851		5.17048		4.74667
	6.4552		8.79882		8.25052		8.03034		4.26549		5.49717
	7.12093		9.4084		8.88583		7.95409		8.91956		4.70411
	8.44023		8.64864		8.75653		6.34212		3.68888		8.58836
	3.66868		8.58821		5.41165		4.62104		7.73368		8.92415
	6.43999		2.77259		4.54754		8.08481		5.46044		4.98086
	4.47734		8.53181		8.18446		8.2836		5.93806		4.13357
	5.8499		8.7643		8.17301		7.93823		4.28772		4.44969
	6.09762		8.19024		8.2379		8.51286		3.8712		4.1957
	6.23206		2.07944		8.5504		7.70958		5.87493		8.97249
	5.81473		8.4616		8.56484		7.00814		4.85826		5.21494
	7.21759		7.56879		7.67304		7.82341		5.99546		4.59714
	8.9379		8.79361		8.49159		7.30465		6.58369		7.39756
	4.62104		7.04089		7.72806		8.56209		5.14749		4.6747
	4.4682		9.35676		8.79143		7.47806		5.88388		4.66721
	6.35054		8.4404		8.24128		8.17864		5.93595		4.3412
	6.7625		8.97259		5.32593		8.49011		4.76729		4.54754
	5.0026		8.5735		8.51623		7.45796		5.46722		3.66868
	4.65205		8.09462		7.99618		8.22169		4.25419		2.77259
	6.76711		8.30459		4.02535		7.10923		5.04986		7.97109
	4.63667		7.87641		8.11444		8.20084		6.7093		4.96981
	6.95235		9.22669		8.61744		8.08997		4.89485		4.06732
	6.21301		8.26215		7.32066		6.87026		5.98141		5.78812
	5.09987		8.02198		8.54387		7.99132		4.20767		5.17953
	5.08512		7.89626		5.53891		8.43694		5.67126		5.40087
	5.14749		8.33634		8.95198		6.48981		5.07016		4.50424
	3.51453		8.67303		8.99665		7.99699		4.73268		3.58352
	5.49059		9.26468		8.67331		8.66782		6.00141		6.33079
	5.8522		8.59297		2.41591		6.8973		3.53806		4.92435
	8.33921		9.25294		8.50058		7.92675		4.86445		8.91452
	5.00797		8.1982		8.06865		8.20587		5.6233		4.65205
	7.1496		8.83066		8.14043		8.16052		4.06732		4.62104
	7.69658		8.88716		8.12017		8.22556		6.40092		5.93806
	6.92913		8.86965		9.28031		8.02748		4.73268		8.38444
	7.21583		8.62924		7.7507		8.24023		4.1463		3.90399
	6.82698		9.35288		8.30933		8.96188		6.09221		5.23218
	7.01965		7.17012		6.87606		8.5231		5.0026		4.21951
	5.56068		8.84425		7.40489		8.70616		5.12871		5.96717
	6.2001		8.90718		9.01257		7.78489		5.92746		4.27667
	6.34774		8.42121		8.51559		8.1402		6.38486		5.60874
	6.08313		8.02722		8.88006		9.04414		6.15698		2.8679
	8.63934		8.85092		6.03069		7.62462		4.6747		4.69684
	5.08016		8.93158		8.44831		7.72064		7.64588		5.37898
	4.7808		9.20609		8.16257		8.32922		5.52625		5.03955
	5.32203		8.07788		9.17922		7.6005		4.92435		6.86192
	5.1885		4.18358		7.95353		8.82902		4.29865		5.09987
	6.19685		9.36543		8.46109		9.39712		5.69306		3.21084
	4.42125		9.84662		4.80729		8.22556		4.45899		4.43082
	5.58199		8.19069		9.02939		8.92989		6.6291		6.32508
	4.62889		7.70526		7.58152		7.63858		5.0186		4.1957
	4.39198		8.23472		4.93591		6.69357		4.41159		7.87123
	7.94506		8.09633		7.97164		8.26935		5.56068		6.2569
	4.93015		7.70238		7.10792		8.9872		4.36182		2.77259
	3.21084		8.85355		8.66561		7.82947		5.31419		3.81991
	3.96651		8.73527		9.01306		8.49764		4.28772		7.52099
	7.81051		8.27548		8.51559		6.76895		4.4682		4.4403
	6.33221		7.8202		8.2838		8.46261		6.47389		5.04986
	4.43082		7.55758		8.13646		8.21652		3.76584		5.0026
	4.96424		8.06514		9.30856		8.58582		5.29029		4.17131
	6.65105		8.57062		7.53177		8.33423		6.53146		4.94734
	5.42935		9.6705		8.33845		8.57848		4.18358		8.44591
	3.6055		8.9319		8.18624		8.35119		3.51453		5.02913
	4.50424		9.14155		8.10482		8.03812		5.67675		4.33073
	6.08859		8.74474		8.3164		8.34778		4.7808		4.52179
	5.24913		8.90642		8.17211		7.88397		4.39198		4.98634
	5.36784		9.01928		5.95687		6.49466		6.126		5.75067
	5.89054		9.1155		3.27336		8.55441		5.36411		5.17048
	6.47266		9.18875		3.03495		8.70536		4.70411		4.18358
	7.53091		7.65842		9.28404		7.51752		5.0186		4.33073
	6.20819		9.05812		6.25229		8.2838		4.15888		3.8712
	4.75359		8.18155		7.8462		8.13669		5.38633		4.58088
	4.35157		7.93308		4.52179		8.88284		5.04986		4.05352
	5.54205		9.54039		8.71342		5.21494		6.83819		5.22359
	4.90676		8.4352		5.27811		8.10796		5.85679		3.49043
	3.10906		8.18824		4.90082		9.00886		4.64439		5.4223
	4.63667		7.76608		8.19842		7.73403		4.58088		3.93574
	1.56862		3.17805		6.5465		8.70642		4.1463		4.54754
	6.34071		9.50682		8.37249		6.80506		4.66721		8.51399
	5.00797		8.28238		8.48086		6.81476		6.76065		3.8373
	7.59368		8.37175		2.54945		6.99577		6.12249		1.16315
	7.95521		8.98999		6.47266		7.17135		5.8861		3.85439
	3.53806		8.55626		2.41591		8.03993		4.27667		3.03495
	3.80221		9.01608		8.06514		7.72489		4.41159		8.55148
	5.91889		7.87246		7.4078		8.30261		6.71125		4.66721
	7.02749		8.4047		5.02913		7.91396		4.08092		4.15888
	5.49388		8.33231		8.03967		8.34835		4.26549		3.96651
	6.24611		9.84306		4.7397		7.94846		2.07944		8.54138
	5.26165		8.13059		8.90772		7.77519		3.66868		5.45018
	7.10135		8.40201		8.26111		8.82291		6.35193		4.87061
	6.19848		8.84759		6.33079		6.96829		6.10836		8.88782
	3.96651		9.56077		8.45889		8.73192		5.6058		5.7275
	5.2575		9.15017		6.75879		4.06732		4.28772		5.17502
	6.86108		8.67399		8.07216		8.53809		5.41521		5.46722
	5.80513		7.68928		7.66744		7.62071		5.13344		5.04986
	7.4951		9.03779		5.93171		8.53684		4.71133		8.03398
	4.82671		7.75414		7.75482		8.07788		7.35551		4.30946
	6.73054		7.61481		8.64485		7.21818		4.73268		7.55966
	5.68494		8.83101		8.86605		7.83582		4.68951		4.4403
	8.30933		9.22621		8.54947		8.02434		6.66848		5.36035
	4.45899		8.56347		4.53045		8.37157		4.47734		8.54496
	6.11014		8.57471		8.64231		8.05096		5.22359		5.09498
	3.49043		8.17774		8.32205		8.41325		4.90082		8.2098
	3.30322		6.40225		6.97354		5.62618		4.69684		9.27897
	5.92746		7.6013		6.61312		7.67786		5.53891		5.10958
	5.14283		9.80948		6.25383		8.43468		5.66296		5.31419
	6.2001		7.68891		8.16939		7.87398		4.32015		5.63193
	5.00797		8.51415		6.81388		8.86356		4.32015		4.73268
	5.17048		8.82808		8.64203		8.12374		5.585		9.04282
	6.66848		5.06006		8.36264		8.16462		4.89485		4.54754
	4.89485		9.39891		1.56862		7.96832		6.76157		5.3452
	5.67126		8.66271		8.52484		7.96804		4.91852		4.8331
	6.18539		9.59479		6.65929		7.35909		2.77259		4.73268
	7.11184		8.40039		8.24905		7.95269		6.17545		5.50696
	5.48397		9.07337		8.1235		7.84808		4.65205		9.82054
	4.68213		8.49568		4.29865		7.1433		6.32794		5.54518
	4.7185		8.17864		7.88998		7.6749		5.73786		4.95301
	4.18358		8.97846		9.08695		6.7353		6.35193		4.26549
	7.33694		9.6581		6.35054		8.93685		6.06471		5.55451
	6.98026		7.8396		4.41159		6.32936		6.97429		4.96981
	5.79301		9.11136		8.46868		5.5483		5.24492		4.75359
	7.3887		7.53945		8.53527		7.57661		6.15358		3.36038
	5.14749		9.17583		9.09659		7.69948		3.91999		5.63193
	5.20181		8.0204		4.69684		9.01724		3.66868		3.70868
	8.40559		8.15594		8.19202		7.78122		5.56682		4.50424
	8.3957		7.63858		6.90455		7.43556		6.65415		3.41444
	8.3373		8.76318		7.88548		7.18781		7.0753		3.27336
	5.75321		9.28128		8.83835		7.43885		4.08092		6.45015
	3.49043		8.97066		6.45646		7.85151		1.16315		4.80729
	5.59397		6.38351		8.04199		7.97961		7.65728		4.25419
	5.89715		8.17707		8.45276		6.11722		3.49043		1.97408
	6.21301		8.36823		5.50044		6.30919		6.20173		5.47395
	5.83364		8.76393		4.79414		6.60881		5.28219		4.98086
	4.72562		9.26974		6.39158		7.20221		7.41216		5.8659
	6.35054		8.68515		7.70886		8.30973		6.37537		4.28772
	8.12255		8.76305		8.6485		6.40225		4.96424		8.24149
	5.5483		9.5732		8.84828		8.01248		5.69843		4.90082
	7.16395		8.40021		8.50204		8.14113		3.96651		5.32203
	7.15399		9.2586		9.18391		6.3956		4.1463		4.61314
	1.16315		9.59539		7.1325		8.13388		5.79545		5.76331
	7.57825		8.70483		7.72912		7.41505		4.05352		5.16135
	4.13357		8.77153		3.17805		8.06614		5.76079		4.75359
	6.9408		8.99208		8.34797		8.31913		6.67051		5.24913
	7.32962		7.70057		7.93423		6.97877		4.76046		4.7185
	3.03495		7.92501		7.7637		7.05549		4.82671		4.3412
	6.881		9.82855		8.77845		8.31522		5.4223		3.17805
	6.11898		8.63109		7.78489		7.71993		6.43615		8.33423
	7.74414		8.07415		7.85119		6.64483		7.24079		2.07944
	3.10906		7.82148		8.88671		8.77413		5.31025		3.36038
	5.87718		9.54636		6.80151		6.80506		6.01713		5.44328
	7.06168		9.46709		8.13035		7.61796		3.44042		4.09434
	4.26549		8.5943		9.2621		7.72277		6.20819		3.36038
	7.48482		9.04773		4.53903		7.79943		6.75972		4.51305
	5.56987		9.21314		5.585		7.23273		4.36182		3.78419
	6.99136		9.24091		4.05352		7.85988		4.62889		4.68213
	7.80041		7.60529		8.6375		8.75097		6.69456		4.03954
	8.37194		9.15288		8.66616		7.52099		5.03435		4.40183
	4.43082		8.74716		5.96922		7.80106		1.56862		5.8313
	6.7504		8.79543		8.02748		8.09218		5.03955		4.49536
	3.53806		10.6686		5.04471		7.51622		4.12066		4.60517
	4.45899		8.35796		5.07517		8.96516		2.95491		5.68222
	5.97939		8.72023		7.26906		8.79009		5.0133		8.17549
	6.25075		8.07564		8.50674		3.66868		4.60517		3.36038
	7.58355		8.48912		8.90044		8.22684		6.51026		5.41521
	6.0904		9.48025		6.7781		8.01381		2.82138		9.01394
	7.68708		9.17575		8.30222		7.00088		6.22416		4.33073
	7.06851		9.13949		4.32015		8.21609		3.58352		8.18356
	7.0218		9.16367		6.46147		8.12017		5.69843		8.87403
	3.24259		8.1878		8.99903		6.50787		4.54754		4.91265
	4.85826		8.11133		4.32015		8.21392		8.59741		5.21927
	5.89275		9.12861		8.61032		7.39166		3.46574		9.38362
	8.38736		6.94467		4.96424		7.2362		6.63647		5.86817
	6.21301		8.37415		7.68965		8.08604		5.585		7.75551
	4.74667		8.42332		8.75223		8.2716		6.09762		3.51453
	6.3393		8.66077		8.38681		9.39406		6.20173		4.02535
	4.03954		7.23965		9.04773		7.80205		6.98101		3.3322
	5.60874		8.16029		6.36853		8.18891		7.71173		-0.223144
	4.94734		8.5348		9.58389		8.02172		5.76079		3.46574
	7.23042		6.57591		8.65814		8.03993		6.56357		6.17379
	5.21494		8.72894		8.79009		8.14532		4.75359		8.29185
	4.36182		9.60092		8.92798		8.68013		4.13357		4.72562
	7.89118		8.80579		4.25419		8.69256		4.87672		4.63667
	5.87043		8.71171		8.55518		8.2638		6.27061		4.03954
	3.64806		8.62809		8.07589		9.02063		4.96981		4.28772
	5.65459		4.53903		9.48384		8.2309		2.61007		5.36784
	9.48214		8.6634		8.20806		7.06783		4.82671		4.83945
	5.48728		8.57183		8.27954		8.39136		5.08016		8.59371
	6.69753		8.71775		8.80231		8.65214		5.97126		5.32593
	6.10836		7.2807		8.64822		7.18962		3.46574		4.21951
	8.20391		8.80795		4.42125		8.7427		4.65966		5.21927
	9.33856		7.80303		8.44109		8.46413		7.00088		3.95124
	7.09008		9.11048		6.17379		7.55255		7.01392		4.64439
	6.37127		8.62364		9.00464		8.15179		5.69843		4.81381
	8.59667		9.24447		7.81891		7.68818		3.56105		5.49717
	4.54754		9.27335		8.51093		6.88592		2.77259		4.26549
	6.67456		8.06489		4.84576		3.64806		5.3452		5.73528
	5.45361		8.52754		8.973		6.02102		4.05352		5.0133
	9.07273		8.41556		8.33404		6.86693		6.23676		8.84125
	3.6055		9.35392		8.54263		8.24947		5.57595		3.85439
	6.58479		8.57425		8.67303		6.39693		4.92435		4.85203
	5.07517		8.87021		8.36749		4.36182		6.84928		3.93574
	7.2922		9.128		5.2575		7.36315		3.68888		4.82028
	7.86634		8.68866		8.49454		8.53872		5.00797		3.10906
	5.03955		8.05452		8.58043		7.61441		4.90082		7.74448
	2.66723		8.80603		8.40183		5.94856		5.49059		8.56377
	5.91242		9.02382		9.13631		6.53379		4.80074		6.09942
	5.33754		8.84298		8.26049		7.04578		7.31854		6.35472
	4.53045		8.60168		7.18296		8.07614		6.37264		3.70868
	3.6055		8.99744		8.58163		8.42998		5.58199		3.81991
	5.28624		9.09075		8.80556		6.17545		4.82028		4.58904
	5.78321		9.06184		8.52421		8.08209		6.40357		4.06732
	3.56105		8.5119		8.07265		7.78887		5.86363		3.96651
	5.88832		8.92755		8.33845		8.99238		3.41444		5.25332
	2.07944		10.0201		8.61758		7.96693		5.2062		3.88773
	5.77827		8.95105		8.02565		9.14018		5.11919		5.55451
	5.98343		9.20922		8.67958		7.79581		4.21951		3.41444
	6.69258		9.30025		7.82724		8.99645		4.44969		3.99636
	3.41444		8.75791		4.05352		8.25572		5.0026		4.6747
	3.8712		9.09892		7.45842		8.72804		6.8851		4.05352
	4.06732		8.96075		8.96188		6.32077		3.96651		5.40087
	7.5403		8.64301		8.38754		7.08473		5.44674		4.09434
	4.49536		7.87185		8.48781		4.52179		5.28624		2.61007
	4.06732		8.75008		7.08473		6.98101		4.59714		5.17048
	4.62889		8.29784		8.05807		6.31065		6.32936		8.35024
	6.40622		9.26695		4.89485		5.5037		3.24259		7.58396
	3.64806		9.86877		8.34512		6.50787		6.60232		5.0186
	6.26302		7.67897		8.4359		8.92287		5.91025		4.35157
	5.91889		8.09584		8.13505		6.96829		3.81991		6.13816
	5.76832		10.0091		8.34778		8.67015		5.24913		7.10923
	6.97653		9.1609		8.80375		8.23959		6.92834		3.85439
	6.02683		8.93611		8.6492		8.16029		9.73341		5.22359
	8.13177		8.95529		5.82423		9.07447		1.56862		4.81381
	8.09218		9.1544		7.87671		7.56673		2.54945		9.17451
	4.82671		8.91677		8.34967		8.47754		4.45899		3.24259
	6.30773		8.75653		8.19996		8.38298		6.87771		8.15156
	6.35193		8.65814		8.62378		8.3044		5.51986		4.10759
	4.35157		8.5946		7.22926		6.12249		3.41444		3.93574
	4.36182		8.59489		7.97797		8.37101		3.90399		6.49103
	5.31419		8.43085		8.06715		8.46817		7.00161		4.33073
	3.70868		8.89738		8.94408		9.21322		4.83945		5.52943
	8.5601		8.5048		8.6093		7.10529		4.18358		4.10759
	5.51665		9.21066		8.61148		7.81019		4.50424		4.76046
	6.46397		9.10026		2.61007		9.06351		5.1885		8.84136
	8.63295		8.68744		3.10906		8.03424		4.51305		7.95914
	3.38777		8.27772		8.1402		7.04438		3.85439		9.56662
	5.53576		4.03954		8.42823		7.87276		7.50351		9.11717
	4.58088		8.41927		8.57138		7.27573		8.88605		5.22789
	4.86445		8.84644		5.27811		8.14439		4.1463		4.92435
	3.7281		8.91075		8.10458		8.21501		6.43615		3.76584
	9.44101		9.13208		9.06619		6.76065		4.21951		4.33073
	7.51578		8.45939		8.81296		7.62618		5.2575		4.1957
	3.44042		8.56224		8.51671		8.67713		5.57595		5.98746
	6.58258		7.99403		8.88161		8.29764		5.99546		5.00797
	5.63479		9.3857		9.27395		6.95845		4.13357		5.02388
	2.41591		8.40613		8.08776		6.84162		5.63479		8.16917
	5.88165		8.26955		8.4727		8.44057		4.52179		4.28772
	4.1463		8.57395		6.50549		7.71065		4.17131		9.0557
	4.78749		8.73088		8.53794		6.81124		6.06843		6.10836
	5.00797		8.92777		4.10759		8.26483		4.05352		3.85439
	5.72489		9.34927		6.25075		8.2111		7.98235		4.68951
	6.31789		8.09852		6.27664		8.21392		4.44969		4.33073
	6.33363		8.9885		7.8608		7.79647		3.49043		4.62104
	4.65205		8.66974		4.8828		7.93509		6.18703		3.51453
	4.75359		8.27772		7.98698		8.28258		6.05725		4.48639
	5.32982		9.2081		8.8132		9.05682		5.78567		3.80221
	4.10759		9.67789		8.11731		6.22258		5.03435		4.80729
	5.08512		9.20344		6.5465		7.10988		4.95301		4.94734
	4.57265		8.17729		8.14113		7.5997		3.44042		4.29865
	5.08512		8.8323		7.93994		7.90012		4.57265		3.17805
	5.65459		9.34613		6.49103		6.85182		7.27904		4.20767
	4.7185		8.45378		6.19032		8.40559		7.13569		8.09974
	3.46574		8.14625		7.29763		5.38633		7.4893		4.40183
	4.08092		8.46918		7.87001		8.37101		6.3121		4.98634
	4.56435		8.12089		5.04471		7.30088		4.66721		5.98343
	5.31812		8.26853		8.53385		7.51491		5.76832		3.70868
	5.10473		9.25921		8.21284		5.03955		3.70868		5.34901
	7.00379		8.89629		8.20018		5.51986		5.82659		5.33368
	3.53806		8.54028		5.21927		7.37073		5.32203		4.86445
	5.17953		7.91074		8.0669		8.45617		4.17131		4.09434
	7.43979		8.91032		8.43642		8.7372		4.01096		3.64806
	1.16315		8.3919		8.69081		6.68661		5.2575		4.15888
	3.64806		8.49126		8.49372		8.07564		4.76729		5.69036
	3.56105		8.77462		7.92008		8.85367		4.83945		5.15213
	8.55426		8.80087		5.16135		8.59992		5.31812		4.80074
	4.25419		8.87749		7.85957		5.6233		8.987		2.26176
	4.93015		8.64273		8.2277		7.81859		8.34948		3.81991
	6.61954		8.4466		7.75927		8.30003		4.74667		4.27667
	5.40807		8.858		9.22849		9.09011		3.76584		4.09434
	6.8851		8.64962		8.644		8.34474		5.14283		5.27402
	6.77171		8.21522		8.9734		8.50706		4.65205		5.19296
	4.3412		9.04178		6.01323		8.72739		6.33363		4.38203
	3.90399		8.49862		8.52706		8.31444		4.7397		5.55141
	8.21241		9.37809		8.05985		8.34569		6.14504		5.51343
	2.7213		8.69376		8.77475		8.56499		4.98086		3.53806
	5.82895		8.65661		8.94335		7.93107		5.17502		4.93015
	6.35054		6.87606		5.47395		7.83645		6.41149		4.7808
	3.627		9.42021		9.03656		7.78289		5.19296		8.82515
	7.96804		8.41379		1.8563		8.02982		7.98125		4.43082
	6.72959		8.76168		7.77486		8.40021		6.87606		4.65966
	7.63318		9.00876		8.73707		6.33079		5.65739		4.85203
	6.95311		3.46574		8.49976		8.52659		4.40183		8.07912
	2.07944		8.42033		3.93574		7.12093		5.45703		5.1885
	3.99636		8.5735		8.44746		8.67358		5.81234		5.15675
	4.8828		9.43916		3.10906		6.36027		5.44328		4.6747
	6.89325		9.04263		7.4776		7.95184		5.17502		8.26709
	7.7128		8.75375		8.21566		8.3203		6.63437		7.99995
	4.27667		9.07877		5.45018		8.18267		5.8522		8.53653
	4.61314		9.24895		8.69081		7.73718		8.89146		4.64439
	7.3196		8.83672		5.27811		6.68261		5.26165		8.85606
	4.99721		9.64467		8.22663		7.97302		5.17048		3.14415
	4.50424		7.85057		8.205		6.84076		9.15093		4.92435
	7.98016		8.79313		8.15249		7.67564		6.08131		8.32011
	3.90399		8.71144		8.42015		4.78749		4.61314		4.6747
	4.96424		8.39444		8.31307		8.42315		4.51305		6.14676
	4.6747		8.50074		7.49465		7.95493		4.96424		6.41804
	5.89275		8.81344		9.40037		8.34948		4.2312		4.2312
	4.7808		8.66672		8.04917		8.72271		3.49043		5.74556
	5.07016		8.08727		8.86853		8.55641		4.59714		4.57265
	4.47734		8.74957		8.77041		8.54745		5.79788		3.66868
	7.25841		8.68825		5.60286		7.73997		5.43634		4.28772
	4.1957		9.79826		8.0679		8.23727		5.27402		5.21494
	6.36716		8.29844		5.98545		8.32748		3.17805		4.87672
	4.91265		8.9869		7.87853		8.63494		2.61007		3.96651
	5.17953		8.25031		8.50528		8.54761		6.64898		3.38777
	6.7353		9.16793		5.1885		7.26347		5.10958		4.05352
	7.12544		9.26119		8.29145		8.0332		7.13569		3.88773
	5.14283		8.80171		6.52327		7.93737		4.53903		3.8712
	6.65105		8.25406		8.12587		8.0601		6.32794		4.1463
	5.46383		9.11541		5.4223		4.24276		6.41017		4.73268
	7.96332		8.2277		8.5732		7.41409		6.75507		4.58088
	9.44538		9.46579		8.4198		9.15955		4.45899		4.93591
	3.66868		8.97147		8.62263		9.47639		3.07269		5.85679
	3.64806		9.65871		8.04508		8.25198		5.6233		4.01096
	1.16315		9.11392		8.37857		7.88668		4.15888		5.49388
	6.20496		8.10119		5.24913		7.64588		3.8712		6.01323
	4.58904		8.08555		3.627		6.99723		5.21058		5.27811
	7.20281		8.42631		8.53511		8.49715		5.11439		5.588
	4.82671		8.58791		4.47734		8.35119		5.2575		3.17805
	7.21406		8.49323		5.48397		8.01301		4.68951		4.61314
	4.51305		8.08973		8.69189		8.05045		4.97535		4.7397
	4.06732		8.4319		9.0153		6.25383		3.44042		5.19296
	6.73815		8.75299		8.3712		8.15018		5.28219		6.10658
	4.3412		8.5223		6.07212		6.6896		5.57291		5.48397
	6.71998		9.23702		7.28783		8.17909		4.95301		4.63667
	7.64588		8.04251		6.58036		7.48077		4.7808		5.24492
	4.42125		9.36857		8.7413		8.6392		5.21494		6.3808
	6.88755		9.02949		4.57265		7.46623		5.36784		4.4682
	3.66868		8.53825		8.62895		8.4906		5.81473		5.11439
	5.31025		8.48417		8.26111		8.603		5.0133		4.12066
	8.1395		8.64372		6.18208		8.28299		7.26962		4.63667
	7.34936		8.2638		8.68393		8.32303		3.90399		5.5326
	4.72562		6.88264		7.78887		8.24149		3.41444		4.94734
	6.41542		8.23938		8.41662		7.43414		2.82138		8.89793
	6.85857		8.76218		4.15888		7.96998		5.07016		4.88884
	7.10398		8.366		7.70706		8.46565		2.61007		5.12871
	4.69684		8.56071		8.61294		2.07944		6.11014		-0.223144
	5.1885		8.40434		8.76605		7.67601		4.61314		5.38266
	4.25419		8.39263		4.82671		7.5993		3.14415		9.35842
	5.49388		9.21608		7.84432		8.96147		4.57265		7.92934
	6.68261		7.72665		8.28864		9.33574		6.07028		3.56105
	3.91999		9.37964		8.62163		8.42578		5.40807		4.60517
	6.59469		8.06363		7.1872		8.36264		6.44635		7.48841
	3.99636		7.63974		7.87062		8.00876		5.80272		5.5326
	6.88346		8.78716		2.7213		8.33634		2.91235		3.93574
	6.44254		8.94314		6.01127		8.60711		6.36716		3.7281
	5.4773		8.4792		5.70645		7.41842		5.67401		8.57153
	5.5102		9.31297		8.7167		9.06481		3.99636		7.05134
	3.98155		8.28803		2.7213		8.40219		4.06732		4.4682
	4.95864		8.67468		5.5999		7.65804		4.33073		5.73528
	4.3412		8.82632		5.68765		8.30894		3.70868		2.41591
	4.58904		8.80279		4.69684		8.67999		5.85679		4.08092
	4.97535		8.16462		5.36035		7.56548		2.8679		4.69684
	5.96717		8.5127		9.54515		8.69898		2.91235		5.66296
	4.38203		8.32011		4.28772		7.68561		4.10759		5.71966
	4.79414		8.57878		7.9253		7.78356		5.03955		3.81991
	4.54754		8.93906		7.8462		8.02748		5.29029		3.10906
	5.5483		8.74945		8.13271		5.4223		6.79436		4.55598
	3.64806		8.88947		8.41414		8.49192		5.88165		3.96651
	3.93574		8.95622		8.44402		9.73365		3.21084		8.30281
	7.61599		8.46379		7.29601		6.88918		5.31025		5.31812
	5.43285		8.70947		4.82671		6.20173		4.85203		4.41159
	8.48169		8.3038		4.82028		6.64795		4.02535		4.01096
	7.8282		8.52055		5.21494		8.64344		3.8712		4.25419
	5.82895		8.04251		7.91425		8.16803		6.5545		4.90676
	1.8563		8.90316		8.78618		8.47887		5.96307		-0.223144
	3.58352		9.28589		7.9195		5.1885		5.75067		5.60286
	7.26235		6.45142		7.50747		8.69309		5.96307		7.28783
	7.10332		8.76917		8.12965		7.61559		6.09942		5.73528
	5.24492		8.82785		9.08948		7.79515		4.39198		5.24913
	5.4773		8.3712		4.7808		8.24801		4.65205		5.93171
	6.11545		9.13337		8.72531		8.86582		7.49465		4.26549
	4.6747		8.36376		8.71012		7.36467		5.56068		5.40448
	5.7301		9.0816		3.07269		8.70377		5.6204		4.29865
	4.6747		7.97742		8.84517		8.34626		3.27336		5.03955
	7.11964		8.15249		5.52625		6.92991		4.47734		7.85647
	4.68213		8.00263		4.90676		7.85771		4.1463		5.4223
	5.69306		9.06961		4.93591		8.37397		4.26549		1.8563
	6.61633		5.67126		7.69549		8.67221		6.56695		8.06111
	4.10759		8.68919		8.45088		7.78055		6.44127		8.84897
	7.06442		8.49813		8.87481		8.15525		8.47504		8.26996
	5.71966		8.12112		9.50961		8.03034		6.04025		6.92047
	2.34181		9.07923		9.11074		6.28563		2.8679		4.37198
	3.70868		8.62177		8.73282		6.14847		2.66723		4.1463
	5.06006		8.49306		5.26165		8.48484		6.78897		4.41159
	4.45899		8.45447		8.80303		8.27119		4.76729		4.47734
	3.56105		9.58828		7.56921		8.66796		4.96981		4.75359
	6.78717		8.64174		6.96753		7.284		2.8679		8.04994
	5.65179		9.3633		4.82671		7.77687		6.04595		8.89442
	5.49717		9.00837		8.20259		7.80564		5.26579		3.10906
	5.14283		8.34265		6.76065		8.94251		5.0026		5.43634
	4.29865		9.49305		7.9597		7.1452		7.58964		4.70411
	3.91999		9.04763		8.46058		8.85732		2.41591		5.16593
	6.18208		9.29019		7.78655		6.89081		3.41444		9.56549
	6.42065		8.37027		6.48616		7.71065		5.32982		9.53872
	6.35611		8.52595		8.78496		8.48384		4.72562		3.41444
	5.40448		8.43137		5.45018		8.03294		0.470004		9.50617
	7.4313		9.15652		4.56435		8.12302		2.91235		1.38629
	7.10988		8.49405		8.61396		8.5897		3.8712		4.99179
	7.22694		8.77202		8.2189		7.4767		6.14161		6.43487
	3.53806		8.82315		8.58657		8.41609		7.64089		4.97535
	5.19296		8.81582		6.13643		5.75574		6.90133		6.27965
	7.29655		8.4312		3.07269		8.30874		4.30946		3.76584
	5.50044		8.32748		5.31812		6.4128		5.67675		4.43082
	4.79414		7.97577		8.65744		7.79218		6.97952		5.5483
	4.38203		6.43999		7.78821		7.74829		4.54754		4.74667
	4.61314		8.92362		5.39363		6.89		4.41159		7.05755
	4.37198		8.09511		9.54995		8.05147		5.18403		6.23832
	5.73269		8.88958		6.18208		8.31933		6.47759		8.89826
	3.14415		9.11735		4.93015		7.81859		3.99636		3.58352
	5.6175		9.24238		8.41751		8.36451		6.6896		3.8712
	3.6055		8.8046		8.29004		8.80375		4.33073		1.38629
	4.7808		7.20875		8.7055		9.27927		6.59578		5.32203
	4.59714		7.57661		7.10135		4.42125		4.92435		4.84576
	6.59905		9.01267		8.70669		8.65102		2.41591		4.20767
	4.61314		8.06665		8.70324		8.05731		2.99573		4.80074
	6.62592		8.26709		8.78349		7.48572		4.53903		6.05538
	8.72557		8.53872		7.91367		7.51622		4.4682		5.72228
	5.71439		8.79713		8.797		8.93811		3.24259		5.84064
	4.68213		9.02469		6.90855		8.13552		6.83905		5.73528
	7.78755		8.15823		8.21262		8.92458		4.90676		5.30629
	4.21951		9.01267		8.20018		8.27812		6.00537		7.66256
	8.00743		8.94804		7.01535		7.69658		4.38203		5.44328
	5.04986		7.72842		8.58208		6.29453		3.76584		5.77082
	4.87672		8.61003		7.8645		8.63494		4.2312		4.62104
	4.33073		8.35946		8.30261		8.01036		6.60014		8.50561
	5.91889		8.32322		8.10772		8.33653		4.15888		8.43451
	7.33381		8.7413		3.07269		8.92851		6.76803		5.6058
	7.54497		9.34207		8.43085		8.17324		6.80062		8.41892
	7.03245		7.62774		8.58761		7.69912		6.65312		8.37581
	8.51415		7.29329		9.0731		4.32015		4.4403		7.0854
	7.5475		8.70098		8.04148		7.27849		5.56375		5.06512
	4.4682		9.29041		8.71788		8.44849		4.91852		5.30629
	5.48397		9.1056		8.78996		6.05725		7.88518		5.41876
	8.32922		9.08269		5.6175		8.36971		5.0133		4.08092
	6.19359		6.82524		8.7314		8.80783		5.27402		4.96424
	5.43982		8.48698		7.91805		8.33807		7.79152		3.8373
	6.76342		8.71683		8.86197		7.44448		4.09434		4.09434
	-0.223144		8.42244		8.17931		7.39511		5.74812		4.32015
	4.62889		8.19886		8.44057		7.19744		6.59905		6.06843
	5.90808		8.95818		5.45703		7.81181		4.36182		4.39198
	5.6233		8.66299		8.26586		7.83011		4.58904		4.38203
	6.1347		8.92936		6.43615		7.88307		3.99636		5.8499
	5.6175		9.49924		7.078		6.65827		4.75359		2.41591
	8.02198		8.52325		8.25072		8.16622		5.84296		3.96651
	2.07944		9.36625		9.04254		8.23217		5.27811		3.3322
	5.70111		9.58911		6.70539		6.37944		5.80754		5.62618
	3.3322		8.16939		7.73613		8.5009		6.00141		4.25419
	4.60517		9.01724		9.00464		8.41112		4.8331		4.61314
	6.20658		7.75482		8.51479		7.56507		4.2312		3.91999
	8.41094		6.08495		7.97687		8.27711		4.37198		4.62889
	5.86363		8.39009		7.74275		8.46851		6.10479		3.36038
	6.85267		9.27613		8.57486		7.83487		5.03435		2.54945
	7.74863		9.08005		5.91674		8.54013		4.3412		5.49388
	7.84055		8.68257		9.38926		8.78263		6.05725		4.60517
	5.29832		9.0396		7.37826		8.49519		5.07517		9.18145
	3.96651		8.16075		8.61352		8.40791		6.67254		3.99636
	6.65002		9.28582		8.9115		7.47715		4.12066		5.13344
	6.45142		8.59504		8.50964		6.83819		6.73054		6.40357
	5.87268		9.09084		3.90399		5.32982		6.53495		4.64439
	6.61847		8.27548		6.93537		8.22876		5.2062		4.82671
	4.70411		8.3604		8.52564		8.48896		5.06006		4.54754
	4.39198		8.78005		5.6685		8.21846		6.14504		7.56216
	4.77407		8.98469		7.7968		8.48268		4.09434		4.01096
	8.38499		9.18703		8.26996		7.34575		3.56105		4.76729
	5.68765		9.00798		8.60139		7.7217		5.07016		3.51453
	8.59593		9.43527		5.12871		8.57168		4.97535		4.26549
	7.27462		9.04367		9.06379		7.21583		5.22359		6.63016
	5.28219		8.84321		4.92435		8.27812		6.83303		4.38203
	5.72489		9.11162		8.36358		8.0734		5.33368		5.46722
	4.94734		9.0795		8.22277		7.55507		3.76584		5.64615
	9.06592		8.58253		4.77407		8.24297		5.07016		3.27336
	4.10759		8.33385		8.26853		7.71922		5.08512		4.29865
	2.91235		8.43884		8.16006		7.03103		4.32015		6.12425
	3.49043		8.51302		7.14772		8.09706		5.62618		4.10759
	6.52913		8.28218		6.09402		8.2204		4.44969		5.26992
	4.53903		8.40595		8.69027		8.17459		7.47079		8.90783
	3.627		8.34493		2.66723		8.18267		4.27667		4.6747
	4.41159		8.34721		8.97046		7.62735		5.8499		4.7185
	5.08512		8.27221		4.39198		8.00583		5.28624		8.17459
	6.79347		8.5741		5.29431		5.14283		8.46362		1.8563
	4.06732		8.09779		7.40586		8.39516		4.36182		4.4403
	4.42125		9.57198		8.54325		8.03709		4.88884		5.08016
	6.07581		8.61003		8.50074		7.63627		4.15888		4.98086
	7.02536		9.60707		7.90868		9.04773		6.9377		6.52913
	7.74552		7.38324		5.54518		8.44471		5.31025		8.4802
	6.11722		8.46565		4.81381		7.75242		4.85203		4.79414
	7.21111		8.24002		8.84437		6.89		5.15675		4.48639
	7.16766		8.51863		5.04986		8.81415		3.81991		4.36182
	3.88773		8.29724		8.13035		6.38486		3.8373		4.80074
	8.6235		9.03121		3.66868		8.37526		4.37198		7.95578
	4.25419		9.56729		2.77259		8.26586		6.45646		3.85439
	4.98634		8.69189		1.8563		8.52087		5.3452		4.21951
	7.64089		8.86931		4.49536		7.46988		7.33694		8.79458
	4.7397		7.951		8.65661		8.67768		6.53379		4.06732
	4.79414		8.17774		8.60153		7.89268		4.94734		2.61007
	6.7093		8.10651		8.43155		7.47261		5.81234		8.61584
	5.93806		7.99995		8.14671		5.13815		6.03261		4.32015
	1.72277		9.18145		8.15754		7.8752		3.88773		4.30946
	4.80074		8.31366		8.15708		8.04508		4.64439		3.99636
	5.12871		7.85306		7.73543		8.03606		4.71133		3.64806
	6.25996		8.76792		8.40488		7.81084		4.57265		6.85097
	5.34138		8.50415		9.16802		6.50787		4.43082		4.12066
	6.20334		8.41927		2.91235		7.10857		6.71805		4.3412
	4.60517		8.54947		8.73256		8.36674		5.71439		9.21632
	5.54518		8.99069		4.99179		6.34493		7.46531		4.91852
	7.26123		8.15318		7.95071		7.56921		3.41444		4.86445
	5.30629		8.43015		9.09075		7.66706		3.96651		4.62104
	8.6707		8.80986		6.36716		9.43021		6.30335		4.88884
	2.17475		8.05807		8.97937		8.24065		6.25229		5.62618
	5.21494		8.42858		8.52975		7.44542		4.98634		5.41521
	5.44328		8.62952		5.52306		8.11133		4.61314		3.99636
	5.66296		8.64076		8.02539		6.73245		6.92284		3.6055
	5.81234		8.06413		8.24884		8.04456		6.01127		5.93171
	4.78749		8.70298		8.13973		8.82761		4.93591		4.52179
	3.91999		8.46007		7.30894		7.48482		4.89485		6.17379
	1.72277		9.47614		8.15869		7.91103		5.39363		5.30629
	2.41591		9.17077		8.23642		7.44775		4.62889		3.80221
	5.90808		7.76404		8.51831		8.82008		5.29029		4.76729
	7.11704		8.23748		4.62104		7.1433		7.53476		5.13344
	3.58352		8.36451		8.21717		8.30697		4.06732		4.17131
	5.06512		8.42385		8.04019		8.81593		7.67415		4.86445
	9.37042		9.72427		7.9978		4.85826		6.61954		7.69476
	4.56435		8.783		8.1395		7.90809		6.2114		3.627
	7.2362		8.57742		7.27184		8.56224		5.0026		4.12066
	4.54754		8.77598		8.25219		8.94835		4.96424		4.05352
	3.627		8.39643		8.23854		8.7292		4.08092		8.47303
	7.55925		9.30077		5.04471		8.38096		4.79414		4.29865
	4.15888		8.32011		8.30677		5.79545		7.23965		-0.223144
	6.10479		8.26606		7.7067		8.45821		5.92532		4.88884
	6.34493		3.10906		6.67859		8.69577		5.64897		3.88773
	6.91413		7.93709		9.44904		7.73543		5.10473		5.36035
	6.14676		8.11803		8.33519		8.27426		7.30304		3.58352
	3.88773		7.73962		4.89485		6.51501		4.20767		4.36182
	4.13357		9.03006		4.30946		7.86879		6.09582		4.52179
	8.12041		8.61961		9.05355		8.61758		3.8373		4.96424
	7.30034		8.35251		4.06732		6.51026		3.41444		6.5419
	5.99146		8.6392		8.97705		8.58866		4.65205		4.64439
	5.11919		8.63863		8.48351		7.22286		4.6747		2.91235
	4.17131		7.79053		8.07415		7.08741		5.23644		8.21262
	5.07517		9.38295		7.25106		8.72998		5.80513		4.13357
	4.6747		8.63095		9.32188		7.77014		6.07397		6.90133
	4.60517		8.47069		6.11014		8.13505		9.24463		3.8712
	7.69912		8.89607		5.74556		8.3203		4.72562		9.4239
	2.66723		9.46138		8.22577		8.56925		4.06732		4.36182
	5.87043		9.13786		8.95725		7.92443		5.13815		4.62889
	6.2114		8.17436		8.7121		7.37023		4.29865		5.81949
	5.63479		8.50155		8.59356		8.38736		1.38629		4.68213
	8.51335		10.1788		7.9348		7.55883		4.69684		2.07944
	5.11919		8.63622		8.03008		6.85267		4.90082		6.30189
	7.39854		9.31037		8.83777		8.61192		7.49243		4.4403
	6.59687		8.49536		8.22513		8.55179		4.26549		5.15675
	6.43101		8.39389		8.00075		7.93795		5.74044		4.58088
	8.07838		8.8825		8.01909		8.351		7.19143		8.31874
	4.98634		7.84557		4.85203		8.35232		6.86108		4.38203
	7.89745		7.95914		8.11301		8.26091		3.99636		4.93591
	5.56375		9.55998		6.243		8.05985		4.25419		3.49043
	5.39726		9.46237		7.85337		6.66134		8.59059		1.56862
	4.93015		9.39559		8.88693		8.25572		5.67949		4.66721
	7.54666		8.62981		8.86061		5.93171		3.27336		3.30322
	0.470004		8.30241		8.2294		7.70057		5.31419		3.74715
	5.10958		8.86039		8.03034		6.10836		7.49554		6.08677
	6.4677		9.25936		8.5653		3.98155		6.2492		7.83929
	8.50009		8.61946		8.6183		8.29205		5.07517		5.04986
	4.56435		8.66147		7.33589		9.11831		2.26176		3.14415
	6.36578		8.6235		6.91254		9.02834		5.3452		5.89495
	5.4223		7.91513		8.38845		8.42192		4.52179		5.00797
	6.58258		6.74477		7.78322		8.03346		7.40732		4.93015
	8.71355		9.81588		4.57265		8.18691		5.8659		4.71133
	2.91235		8.38371		9.38577		7.48482		6.03835		4.95864
	5.14749		8.60344		8.23196		8.25052		5.24492		4.63667
	7.41986		8.65228		7.91805		8.46295		4.15888		3.41444
	4.68951		8.58761		5.44674		7.89417		6.12949		5.25332
	3.78419		8.13903		8.52357		8.44711		5.11919		4.55598
	4.13357		8.58268		3.81991		8.89749		5.71966		6.23363
	3.93574		9.22495		4.26549		7.00959		5.97126		4.45899
	4.51305		7.31269		8.32361		7.06236		8.27058		3.99636
	8.70031		8.54465		7.81375		8.83031		6.04025		5.96307
	4.59714		8.5406		4.86445		9.28626		4.36182		6.87441
	8.23811		8.79264		5.99745		6.95921		5.5999		4.94164
	5.8861		8.32942		5.10473		7.74932		6.29305		7.93537
	8.46464		8.25448		9.78978		8.38023		4.94164		6.06657
	4.17131		8.30815		4.99721		7.99672		4.58904		4.02535
	5.15213		8.31268		8.12658		7.91484		5.15675		4.40183
	5.77331		9.2454		8.39172		7.36771		4.47734		4.12066
	5.67401		8.48945		8.13106		8.48616		5.30629		5.57291
	7.69549		8.82385		8.73899		8.87705		8.28964		4.37198
	5.48728		9.20215		3.51453		8.11253		5.37898		3.21084
	5.67401		8.77833		8.8202		8.10531		6.12774		5.27402
	4.3412		7.9019		8.65494		8.38718		4.21951		8.05274
	5.82895		8.29924		6.64483		8.89025		4.37198		7.13186
	4.13357		8.83568		8.9359		7.15086		6.77719		4.94164
	5.69036		8.3115		6.95845		8.91945		3.8373		5.17953
	5.22359		8.26647		8.84931		8.09755		4.94734		2.17475
	5.26579		8.47136		4.66721		5.00797		5.17048		8.2844
	4.58088		7.93222		6.29009		7.33014		5.59397		4.7808
	7.86357		9.06035		8.25739		8.4319		4.54754		4.85826
	6.5419		8.46851		7.93937		6.88018		5.28219		5.59397
	4.68213		9.33884		9.15		7.75517		4.45899		5.61459
	4.06732		8.75929		8.76879		5.91458		4.63667		6.04784
	5.18403		7.57291		5.83364		7.97687		4.28772		3.98155
	5.6685		8.83742		6.28711		8.31307		5.32593		4.95301
	5.0026		8.61468		8.51077		7.90839		5.75067		5.4223
	6.01713		7.54581		7.93652		6.96602		3.41444		4.42125
	3.24259		8.90761		8.15502		8.1041		3.56105		3.68888
	6.05538		7.98071		4.43082		8.42174		7.6786		5.95687
	6.00141		7.57702		7.90041		6.79972		6.09762		4.06732
	7.00742		8.89223		4.76729		7.78555		5.64615		4.78749
	4.50424		8.36674		8.03113		7.46851		5.5037		4.94164
	6.07764		8.2436		8.10362		8.59089		4.39198		7.24194
	4.50424		8.53841		8.29545		7.48437		3.85439		9.0902
	4.68951		8.94241		6.78083		5.38998		8.56132		8.60784
	6.12774		8.18891		4.94164		8.25739		4.01096		2.41591
	5.56068		8.04353		8.60198		7.76676		4.93591		3.99636
	5.75574		7.58923		4.68213		8.70151		8.64808		5.19739
	5.96512		8.50884		8.58178		8.19666		6.28413		4.32015
	5.50696		8.97269		5.8499		5.41876		8.76568		4.13357
	3.53806		7.92934		6.15867		8.32516		1.16315		3.91999
	3.46574		8.87066		6.27815		7.6603		4.02535		4.97535
	6.39024		8.51767		8.16257		8.49862		5.81473		5.00797
	5.28219		9.16944		8.23472		8.22126		6.30919		3.85439
	5.26992		8.29585		7.76166		6.34634		4.06732		6.09402
	6.60123		8.8964		8.11564		4.76046		4.79414		4.21951
	5.78567		9.49076		6.9943		8.62551		4.89485		4.85203
	5.21494		8.48136		8.1858		5.86136		6.59469		3.85439
	6.06285		7.84776		5.50696		7.82692		3.98155		8.46464
	6.91095		8.66727		8.00022		8.37747		6.98915		8.04994
	7.85461		9.0939		8.94856		8.42823		5.31419		8.30756
	4.28772		8.89322		8.58193		7.02749		4.47734		7.81956
	8.45037		8.76543		7.93623		7.56091		6.78446		4.06732
	8.14299		8.88472		5.14749		8.0694		5.36411		6.06471
	5.9733		8.34208		3.21084		8.1481		6.62804		4.03954
	4.96981		8.85		8.99338		8.14717		5.8313		6.33363
	6.01713		9.24825		8.68731		7.96109		4.39198		4.74667
	4.49536		3.41444		8.0345		8.95715		5.68222		4.30946
	5.8545		8.04892		8.54528		7.89357		3.88773		6.57368
	9.06369		7.46897		7.48032		8.27731		3.90399		5.15213
	7.18296		3.07269		3.56105		6.27212		4.49536		4.79414
	6.02102		8.87928		5.15675		8.39136		5.15213		4.8331
	5.48397		8.08678		4.42125		7.4767		6.2178		4.42125
	3.07269		9.39139		8.18088		8.40934		5.04471		8.72062
	6.90455		7.84745		8.21175		7.97109		-0.223144		4.85203
	5.5037		7.99914		8.61323		5.89054		3.8373		6.78627
	6.96527		8.64555		8.15272		6.00141		6.15698		1.72277
	8.05605		9.35212		8.28541		8.05934		5.30231		5.33754
	5.73269		9.31966		8.20915		7.77081		4.71133		8.0407
	8.97076		8.84067		8.37157		3.56105		2.8679		5.6175
	8.62508		8.53668		7.99483		8.09974		7.37576		4.10759
	5.80272		8.90501		9.12548		7.14835		6.51145		3.88773
	8.46193		9.15203		8.28198		7.93509		6.65724		4.64439
	6.55678		8.20281		8.60974		9.2378		6.2098		3.56105
	3.49043		7.69803		4.35157		8.37175		5.98946		8.67509
	5.39726		8.27751		8.02277		5.08512		2.82138		4.85826
	4.92435		9.00474		5.28219		8.31542		7.16395		8.02277
	5.95272		8.98989		8.35062		8.16257		6.72287		4.2312
	5.42935		8.97947		6.71708		7.81343		5.57595		5.55141
	5.3452		8.3269		8.87548		7.83803		2.61007		8.79398
	2.07944		9.02131		8.16712		7.63781		5.16593		4.27667
	5.45018		9.10124		7.67452		8.52389		3.03495		5.23644
	5.31812		8.1849		8.48484		7.29002		5.90808		4.20767
	6.296		9.95197		5.58199		6.74099		4.95301		8.5656
	5.89275		7.58274		7.09407		7.04925		6.23676		3.8712
	6.26454		9.20978		0.875469		8.75841		4.52179		4.25419
	5.77579		9.24044		8.79143		8.20697		6.374		8.22898
	5.59397		8.10216		8.55318		8.6674		3.8373		6.66441
	5.81949		8.24465		6.09942		6.8086		4.25419		4.53045
	4.4403		8.1982		7.87762		8.5069		5.16593		4.51305
	4.72562		8.77028		7.95325		8.63934		4.24276		4.85203
	7.42988		8.22449		8.23451		8.31032		4.99721		5.81473
	5.17502		8.38004		8.35721		6.70539		5.10958		6.10836
	3.81991		9.37816		8.59903		8.51286		6.03069		4.96424
	4.29865		7.84023		5.78321		8.46901		5.64049		5.83598
	6.78355		8.46278		4.02535		7.53262		6.51264		4.40183
	7.34161		8.86118		6.7315		8.58403		6.19359		3.03495
	5.73786		7.84557		7.74275		8.11636		3.14415		4.74667
	5.05497		8.98949		5.26165		8.71342		5.82186		8.54854
	3.07269		9.03341		7.93623		6.76157		4.79414		3.8712
	6.64275		8.00637		8.19666		8.7787		6.13643		6.07581
	6.17877		9.08142		8.51863		8.31991		7.58559		3.10906
	6.8399		4.62889		5.41876		6.17212		3.10906		3.74715
	8.37489		8.44057		5.08512		4.21951		4.87061		4.45899
	7.73438		9.21018		8.30459		6.19522		5.1885		5.69575
	6.83819		8.89333		8.77648		6.78174		5.71703		5.52943
	5.32203		8.40308		8.38133		6.94774		6.20334		4.05352
	5.743		8.96903		7.70201		9.32081		5.05497		4.50424
	6.756		8.82102		5.6058		8.75287		8.76929		4.45899
	5.26165		8.15364		8.58597		8.41574		4.49536		3.07269
	5.56068		8.72661		8.17459		8.27099		3.56105		2.41591
	5.15213		8.55688		8.20718		9.09713		3.6055		3.68888
	3.53806		8.84113		8.132		8.04508		5.31419		8.01301
	4.17131		8.52564		8.84263		7.99321		3.99636		4.13357
	4.90082		9.11893		7.00307		7.17503		6.47389		4.52179
	6.74288		8.3436		8.04353		8.79906		5.93595		4.62889
	4.97535		7.94704		7.14583		8.24339		5.17048		5.10958
	4.32015		9.2786		4.42125		8.18802		5.97126		3.78419
	4.79414		8.67276		8.05427		9.34291		3.36038		4.32015
	5.71703		9.08749		8.01803		7.06715		5.0133		8.1644
	5.38633		7.91834		7.79449		8.20544		2.48491		5.77331
	6.63016		9.10941		8.23281		8.24423		6.01127		4.4403
	6.4323		8.57395		7.09141		8.46345		4.35157		3.66868
	4.62889		8.43694		8.55718		8.79809		7.02394		5.23644
	4.99179		9.50235		5.06006		8.59282		4.7185		4.82671
	6.34353		8.16735		4.66721		7.80433		5.65459		4.45899
	5.55451		8.39823		4.90082		7.69694		5.09006		4.47734
	6.04216		10.1227		4.53903		8.18468		5.08016		3.8712
	5.7275		9.20263		8.28783		7.80661		5.27811		3.85439
	4.78749		8.63821		8.65647		8.55611		5.13815		4.65205
	5.15213		8.23938		8.2838		7.80205		3.80221		4.37198
	7.01175		8.49044		8.69658		7.99645		5.80513		2.61007
	5.80754		8.9875		8.35062		8.53841		7.51882		4.65966
	6.45646		9.03532		5.13815		7.90898		5.91889		4.98086
	6.08677		9.44228		9.27403		7.6823		6.47512		8.07141
	5.68765		9.7345		4.10759		8.04508		5.22359		4.13357
	7.97824		9.02247		5.27402		8.07714		4.76046		5.46383
	5.55141		9.81264		8.43815		8.57682		6.91413		2.34181
	5.38633		8.48384		8.82468		8.91763		5.42935		4.3412
	3.90399		8.61119		8.64358		8.13412		5.46044		3.98155
	5.57595		8.0816		8.29485		7.94307		4.33073		4.27667
	2.07944		8.54122		8.12705		8.4168		3.14415		7.71744
	6.5914		9.14821		8.01751		7.41023		5.89054		5.89935
	4.89485		8.19688		8.06287		8.23366		7.16085		4.48639
	5.61167		9.06785		8.02695		8.15064		4.93591		4.13357
	5.26165		8.77549		8.53322		8.59711		6.02876		3.66868
	4.57265		9.44202		5.35281		6.7353		4.21951		4.25419
	6.31644		5.55141		8.77611		7.81537		7.0954		5.56682
	7.64435		9.00514		8.0684		9.23718		5.65179		6.36165
	4.79414		8.41945		8.20762		8.57183		3.96651		4.70411
	7.6708		8.77177		8.44574		6.03835		5.29029		4.1957
	5.94647		8.12776		4.62104		7.62306		5.7275		4.21951
	6.32794		9.18899		8.17436		7.93451		3.6055		4.51305
	7.97467		7.76946		6.77445		5.71966		4.83945		4.52179
	5.0186		8.42227		7.56299		8.27344		5.41876		3.64806
	5.24069		9.07447		5.70378		8.13599		3.30322		5.46722
	4.87061		8.27058		8.42367		6.60989		3.68888		3.93574
	6.54535		8.78263		8.25572		8.75299		4.43082		4.53045
	5.52625		7.5981		8.3417		7.29817		0.470004		4.01096
	5.79301		7.86634		5.47059		8.70364		5.68765		4.72562
	7.16085		8.01777		8.76493		7.6045		6.06657		4.84576
	5.43634		7.84839		8.7814		7.2046		5.55141		4.05352
	6.76895		9.43681		7.98671		7.98807		6.7391		4.8828
	2.7213		8.65605		8.04482		6.68361		5.47395		4.2312
	4.79414		9.06453		8.61134		7.01751		6.1671		3.70868
	3.7281		8.69591		5.6175		8.79361		5.84296		5.23644
	6.71998		2.91235		5.19739		8.1082		4.20767		9.55046
	5.99943		8.54605		9.19802		6.11368		6.39826		3.07269
	5.45361		8.73797		7.23677		7.81019		7.58761		6.00537
	4.48639		8.7787		8.54512		6.70343		6.37537		3.10906
	6.27514		8.24528		9.17093		8.21933		2.7213		5.6685
	5.87718		9.00376		8.36246		8.61163		3.36038		1.16315
	7.93766		8.24947		8.04096		8.83195		4.1957		5.588
	4.26549		9.20319		9.67533		8.78017		3.627		4.77407
	6.85772		8.29125		4.05352		8.4502		4.91852		4.12066
	5.26992		9.06555		8.52357		7.2829		4.53045		4.87672
	4.18358		8.92532		7.9163		7.97467		8.53212		5.69575
	8.21738		9.20472		8.83498		9.2907		6.47018		4.70411
	4.02535		8.67002		8.59341		7.71244		8.35213		4.03954
	6.11898		8.23642		3.85439		7.47216		5.56375		4.28772
	8.08036		8.67727		8.42279		8.48879		5.19739		1.8563
	4.92435		9.32217		8.87021		8.797		3.95124		4.43082
	6.12425		8.95756		7.58842		6.80062		5.94017		6.43743
	4.62104		9.79915		7.99483		7.3667		6.33363		7.66819
	6.93303		8.2232		8.22019		7.53348		4.77407		3.81991
	2.95491		8.62191		7.7067		7.89655		5.85679		8.75426
	6.64483		7.81311		8.01009		8.51623		5.26165		7.84964
	6.20658		8.36115		8.08948		8.0674		4.70411		5.48397
	4.98634		8.75249		5.63479		8.85925		5.09987		3.44042
	6.2691		8.42771		8.81878		7.41264		5.6685		8.49585
	6.89244		9.32081		4.49536		8.81582		6.25843		4.8828
	5.17502		8.46565		8.52627		7.93737		5.1885		8.78789
	8.16143		8.08011		7.78954		8.88084		6.04973		4.62889
	5.81473		9.53277		8.10579		8.87559		5.68222		3.78419
	4.65966		4.45899		4.39198		8.54667		5.43982		8.3948
	6.51856		7.59569		6.46272		8.02956		4.13357		4.27667
	5.08512		9.03389		8.2457		6.6886		6.17045		9.00769
	6.21621		8.59578		8.35119		7.57044		8.99833		5.34901
	6.26606		8.99794		8.87033		7.32857		6.95693		4.95301
	5.75827		9.2015		7.19744		8.43033		4.97535		5.13344
	5.04986		8.52706		8.64569		7.04368		4.21951		3.90399
	6.08859		8.51687		8.2436		8.34151		5.7301		3.38777
	5.54205		8.69644		8.5977		9.02131		4.53903		2.95491
	9.05784		8.93369		8.05757		7.58437		6.19359		3.80221
	6.37809		8.63281		4.54754		5.74556		5.1885		5.29832
	5.15675		8.25239		8.04815		8.01909		5.08512		5.47059
	6.39693		6.62804		8.7096		7.6786		3.95124		4.82028
	5.68222		8.66616		3.91999		7.58233		5.64049		4.57265
	8.56408		9.06471		8.90164		7.61914		7.61283		6.64275
	4.38203		8.01142		9.04462		4.87061		4.41159		5.99943
	4.09434		9.60373		5.2062		6.40886		4.64439		4.42125
	7.31002		8.99685		7.83106		8.40916		5.06512		4.52179
	7.24423		9.11744		5.68222		7.95381		5.7301		4.91265
	3.3322		7.96749		8.43277		8.32594		3.64806		5.93595
	4.01096		9.14523		8.56956		7.69147		5.9733		2.8679
	6.62274		8.90066		6.67658		8.2379		5.71175		4.98634
	8.52421		8.70417		5.39726		8.36971		3.88773		8.73848
	3.8712		8.74932		8.62033		7.97302		5.94017		4.42125
	4.88884		8.72817		9.34592		8.31503		5.9548		5.10958
	5.53891		8.43988		8.60124		7.35654		4.98086		4.64439
	6.14161		10.3846		8.30618		7.93193		8.49601		8.57138
	8.46177		8.3111		7.93652		6.02296		7.21524		5.55451
	8.30973		8.49011		3.68888		7.3887		5.47059		7.56216
	3.41444		8.51093		7.72241		7.20578		4.40183		4.6747
	2.66723		8.3957		8.2478		8.52722		4.96981		3.21084
	4.21951		9.29262		8.7638		8.9422		6.49345		2.8679
	6.0249		8.04302		4.65966		8.23217		4.84576		5.54518
	5.78812		7.76642		5.23644		8.67795		5.40807		4.55598
	3.64806		8.53291		5.82895		6.51382		5.94856		5.0133
	4.7397		8.13669		8.91064		8.39208		4.88884		5.61459
	6.40754		8.72687		8.99218		8.13763		5.6233		2.17475
	7.70129		8.23727		7.89297		6.88837		4.8828		4.15888
	8.78263		7.57784		6.72575		7.40489		5.40087		5.13815
	5.5576		9.12626		5.83598		8.56545		5.67675		8.79942
	5.26992		9.18317		9.2101		7.86665		6.15358		4.28772
	6.46646		9.45626		9.22991		8.92787		3.8712		4.96981
	3.07269		8.75097		8.49356		6.26606		4.90676		4.43082
	5.56987		9.87587		8.45956		6.82958		6.27061		3.46574
	6.06099		8.50447		8.57456		7.54877		8.78288		8.43607
	5.21927		9.33574		8.49617		7.84401		3.74715		4.6747
	4.1957		9.06444		8.32768		7.46302		5.57897		6.78174
	5.79301		8.85458		8.20893		8.16394		4.03954		4.20767
	6.66339		9.14069		5.70378		6.67859		6.04784		5.97534
	5.42583		8.61845		2.99573		7.82852		5.24069		3.88773
	5.16593		8.66244		8.5541		7.78389		4.95301		6.90053
	4.26549		8.47787		6.78987		8.67645		2.48491		6.77445
	6.78265		8.00236		2.66723		7.70922		5.63479		4.66721
	5.15675		8.59059		8.85936		8.86356		4.92435		5.18403
	4.68951		9.15846		8.4298		8.91226		6.22099		5.53891
	5.82659		8.45939		8.25198		8.12207		3.88773		4.39198
	4.61314		8.57652		5.99346		6.52092		3.95124		3.80221
	2.8679		7.91775		5.45361		8.18043		3.53806		5.33754
	7.35449		8.93874		5.03435		8.61454		5.63193		6.10836
	5.44674		9.05448		8.67577		8.16939		5.70645		5.03955
	4.98086		8.10724		4.10759		8.33596		4.95864		5.5576
	6.03452		9.43034		6.36578		7.12994		4.60517		3.95124
	6.35054		8.83381		5.53891		6.71611		5.47059		3.76584
	8.29125		9.4625		8.54309		7.37776		5.26992		2.07944
	6.82176		9.60022		8.65647		8.40416		5.84528		0.875469
	5.52943		9.46063		6.8552		8.42701		3.96651		4.60517
	5.07016		8.73822		7.80368		8.2578		4.4682		3.98155
	0.470004		9.57715		8.22363		7.91979		5.79788		8.58103
	5.0186		8.45702		7.81698		9.01062		4.4682		4.10759
	8.35759		8.89924		8.84148		9.23312		6.2114		4.68213
	3.10906		9.3401		7.97053		7.97412		5.32982		4.24276
	5.42583		8.67618		7.80433		8.28319		5.28219		4.82671
	7.09738		7.81537		8.34246		8.01724		2.54945		4.44969
	7.34524		9.58883		8.87738		4.65205		3.98155		4.90676
	5.40448		7.93279		8.25593		7.63704		6.27514		4.32015
	4.38203		7.88458		8.10095		8.35175		3.38777		8.49274
	4.15888		8.284		7.04578		7.10135		5.34901		5.11919
	6.11722		7.88458		8.29425		8.09706		6.74477		4.7397
	8.40057		8.85549		7.84118		7.82501		3.68888		4.4403
	3.7281		8.23663		5.07517		8.7709		5.99146		4.94164
	2.54945		8.94908		8.43988		9.30135		6.02876		5.2062
	6.71998		8.33634		5.02388		6.95997		8.79567		3.30322
	6.15528		9.41774		8.45668		9.27942		5.39726		4.95864
	6.72287		8.51286		6.73625		7.24022		5.13344		4.73268
	4.8331		9.17757		5.96101		7.36467		4.24276		4.58904
	7.66482		8.25427		6.61312		7.59689		6.13123		3.58352
	4.55598		8.76892		8.79252		7.01031		4.24276		6.2098
	7.87337		8.73694		7.91367		8.33308		4.44969		4.92435
	7.02536		8.7941		4.21951		8.88671		5.7091		4.37198
	6.2178		8.76879		8.30776		8.58298		5.11439		5.15213
	8.47035		8.00557		7.98725		7.65501		5.16135		4.40183
	5.38633		9.73729		7.97852		8.19754		5.48397		4.30946
	6.96527		9.06305		6.99062		6.20658		5.82423		5.27811
	6.13643		8.74856		8.86616		8.33749		5.12871		3.17805
	5.76079		9.40643		4.91265		8.16871		3.51453		6.23676
	4.87672		8.15203		5.09987		7.31801		5.48064		5.26165
	5.16593		9.53895		7.90397		7.91863		6.71125		4.21951
	6.19359		8.47704		5.45018		8.1929		7.04647		4.06732
	8.56453		8.81676		8.23345		6.74759		4.1463		3.64806
	5.08016		8.88516		8.73527		7.6834		4.21951		5.28219
	4.88884		8.10507		5.83364		8.50496		6.1347		3.80221
	4.18358		8.838		8.16029		6.13643		0.470004		9.19502
	5.08512		8.78691		8.74027		8.58103		4.8331		4.17131
	8.20718		8.57153		5.44328		5.67126		6.81213		4.66721
	5.35281		7.78854		5.79301		6.51264		5.24913		9.2873
	8.64948		8.39859		8.39462		8.32458		3.3322		5.25332
	7.69476		9.29314		8.18847		8.62062		2.54945		6.2178
	6.6291		8.33768		5.98343		7.79647		7.2362		5.19739
	6.16542		7.35141		8.78066		8.22577		3.38777		5.18403
	5.23218		8.17909		8.47052		8.02748		4.58088		8.85389
	8.91366		8.76017		7.37726		8.19798		4.48639		5.32203
	3.80221		8.91086		8.20215		2.34181		4.58088		4.63667
	1.16315		4.2312		4.49536		7.71352		7.33746		4.55598
	3.53806		4.40183		8.59667		8.63721		5.95064		5.02913
	6.57591		9.1635		6.85267		7.98371		3.07269		9.08023
	5.99943		8.93337		7.20697		8.07041		4.73268		5.0133
	6.50309		8.79033		5.36411		6.02296		9.0557		4.4403
	3.78419		8.30697		9.52076		8.4305		6.45268		3.85439
	4.80729		8.75917		6.36303		7.1325		4.38203		4.98634
	5.07517		9.55784		4.85826		8.82879		6.30335		8.60447
	4.36182		8.98969		8.83614		9.2474		5.09987		5.16135
	5.40087		9.11383		7.74379		5.40448		5.71703		4.33073
	4.47734		8.79555		8.78177		7.17196		4.20767		5.10473
	6.19685		7.46256		8.51109		8.14113		5.08016		2.17475
	6.4049		7.78589		5.41521		7.80857		5.15675		6.91334
	5.50044		9.23202		9.26763		6.296		3.38777		4.63667
	4.09434		8.2398		6.82524		7.81311		6.18539		2.61007
	4.09434		9.13398		7.84463		6.83303		7.11444		5.98141
	6.39826		8.72752		6.67759		8.38936		9.05766		8.925
	4.80729		9.33595		8.10724		8.22876		5.79545		9.62245
	6.46397		8.4198		7.83803		8.9873		4.47734		4.97535
	7.61164		7.65007		5.62906		8.26462		4.7397		3.44042
	3.85439		8.31738		6.72479		8.9302		4.1463		3.91999
	6.27061		8.85732		8.48384		8.00823		5.71703		3.38777
	0.875469		8.30182		8.53196		5.70378		7.20875		8.0694
	4.2312		9.28886		3.81991		6.87523		4.02535		3.53806
	4.81381		8.63821		4.99179		7.99348		7.66669		9.17276
	5.79545		7.87093		8.38261		9.16207		6.58147		5.4223
	4.27667		8.11085		6.17045		7.19803		1.16315		8.8825
	7.02037		7.64969		8.84966		6.83647		8.73359		8.51367
	5.0133		8.50058		8.83893		5.12396		8.37894		4.63667
	8.83777		8.87805		4.57265		8.6846		4.51305		4.7808
	6.89972		7.83423		7.92848		8.38004		4.65205		8.17459
	5.80754		8.87861		8.29465		8.33289		3.91999		4.41159
	5.44674		8.67686		8.44831		8.36656		5.80272		8.15156
	5.65179		8.54153		6.32364		8.06388		5.32982		5.27402
	4.1463		8.74474		8.10071		7.82915		4.68951		3.90399
	5.60874		8.3879		6.09221		8.20806		3.30322		4.50424
	4.82671		9.04528		8.37064		8.87291		5.31025		4.02535
	5.45361		8.84655		8.78936		7.63434		5.52306		4.28772
	8.27894		9.19046		8.45889		8.14206		4.52179		4.43082
	5.83598		8.60974		7.78289		8.61497		5.36784		4.38203
	5.31419		9.87332		8.66492		8.45293		4.7185		8.95302
	6.77537		6.98175		8.64513		8.99626		3.85439		3.24259
	5.40807		8.52484		8.13224		6.71901		5.29832		8.62608
	4.71133		8.85332		8.3879		7.51578		6.80417		5.11919
	3.96651		9.83049		8.603		8.63962		4.88884		4.72562
	4.92435		9.33792		5.91025		8.19798		6.03835		3.41444
	6.9554		8.99764		8.36358		8.07689		4.50424		7.92443
	3.68888		8.65452		8.90218		8.46834		7.64243		8.19952
	4.2312		6.89972		4.3412		7.21111		4.29865		3.98155
	5.04471		8.52198		8.70709		7.46531		5.98343		6.51382
	6.87275		9.45219		8.23494		7.9125		4.70411		4.25419
	4.48639		9.46007		3.78419		9.02767		4.47734		4.30946
	4.86445		9.41481		7.41023		8.07589		5.84759		7.8202
	4.87672		8.88439		4.68951		7.9597		8.33558		3.51453
	8.85298		8.71591		8.63181		8.12917		6.80417		8.59593
	6.82089		9.2085		6.68361		8.78923		6.44635		4.55598
	6.27965		8.40577		7.77452		7.68855		5.51665		5.17953
	4.05352		8.57893		5.72228		6.71125		5.68494		4.09434
	3.17805		7.39215		7.58152		8.43277		5.19739		8.351
	5.56068		8.58028		6.21461		7.51447		7.70742		8.30637
	4.39198		9.61554		5.65739		8.05579		3.74715		5.4223
	4.2312		8.92564		7.48841		6.19685		6.23832		4.7808
	6.61526		8.89201		8.81996		7.0934		5.2062		7.1695
	8.35383		9.43361		6.67658		7.87671		5.41876		5.0026
	5.50696		8.60153		7.70598		8.88704		5.14283		4.6747
	5.04471		9.07649		6.17877		6.11191		4.24276		7.52143
	4.95301		7.92328		8.75147		8.1416		3.10906		6.20334
	5.81711		8.60065		5.07517		8.08456		2.34181		3.66868
	7.11314		8.61526		8.51511		7.71101		7.19684		4.94734
	4.90082		9.1686		8.69524		8.45208		4.25419		9.08822
	5.40087		8.83288		8.76605		7.59166		4.1957		4.42125
	6.74099		8.58328		8.69778		8.07016		5.85908		7.14835
	6.91095		8.05833		8.2232		9.07914		4.97535		3.8373
	5.743		9.57031		5.32203		6.93225		6.36165		2.48491
	3.30322		9.18719		8.32147		7.61678		3.3322		2.95491
	4.44969		8.6222		6.90053		7.98942		5.86817		4.17131
	6.15018		8.69618		8.04636		7.04787		3.49043		2.26176
	5.45361		9.86437		5.67949		7.92934		6.06657		6.01323
	3.07269		9.70665		4.40183		8.3919		5.38633		4.81381
	4.66721		8.63778		8.88206		9.07117		5.27811		7.87702
	7.5475		8.04866		8.77586		7.80824		4.77407		3.07269
	5.46383		8.56408		6.78807		8.25656		4.76729		4.4403
	5.45703		9.13932		7.82437		7.8648		6.53727		4.83945
	6.24144		8.53165		8.74142		7.70778		3.38777		4.38203
	5.71703		8.6375		8.06187		6.03261		9.54864		8.2478
	3.93574		8.69885		6.01127		8.53448		7.48572		4.93591
	7.05134		9.56662		5.31419		8.46868		5.07016		4.49536
	4.89485		8.85252		8.21154		8.78545		5.24069		2.91235
	5.44328		8.39588		7.73962		8.36786		6.53727		4.6747
	6.24611		8.80639		8.88417		7.67712		4.41159		5.45361
	4.30946		9.48949		5.21058		8.40684		6.963		5.56682
	4.72562		8.5022		8.37194		8.42332		4.43082		4.54754
	7.92037		8.84989		8.53448		7.94817		5.05497		4.94164
	4.95864		9.22416		6.51026		6.47759		5.38633		5.69843
	7.09074		8.06313		4.91852		7.11184		6.13988		5.31025
	4.58904		7.95578		5.56068		8.41219		5.16593		3.44042
	8.08678		9.02247		8.36581		5.55451		3.58352		7.99403
	5.52943		8.29764		8.43988		7.64435		4.56435		5.8313
	3.70868		10.07		6.13988		8.77128		6.47018		3.51453
	6.24611		8.8424		5.0026		8.0739		4.73268		5.91025
	7.11899		8.78753		5.46722		6.30628		5.54205		4.40183
	7.03245		8.92808		7.48257		9.13906		5.41521		8.19644
	6.49224		8.35702		5.02913		7.5475		5.83598		4.61314
	6.08131		8.91172		7.71244		6.62274		6.36441		5.23218
	4.1957		8.30677		8.49764		7.87793		6.30481		5.19296
	4.98634		8.66188		8.3238		5.99745		5.56375		5.04986
	4.79414		8.45447		8.30321		8.22491		6.5419		4.12066
	3.76584		8.52738		4.2312		8.10046		3.78419		4.05352
	2.26176		8.0225		6.6896		8.69363		3.7281		9.84463
	6.85857		8.98228		9.20585		7.06305		5.67675		8.38371
	4.37198		8.96618		6.94621		7.09074		4.29865		4.68213
	5.13815		8.24675		8.15846		8.07962		5.38998		5.13344
	3.8373		8.3699		9.03513		6.84673		5.65179		4.41159
	6.13123		8.1154		8.95354		6.66747		5.15675		4.8828
	4.13357		8.22105		9.0512		7.30948		4.87672		5.32593
	5.9548		8.85504		7.43508		7.14393		8.60491		5.66018
	6.19359		9.26808		9.16743		8.22019		4.84576		4.08092
	6.23519		8.65466		8.45617		8.43676		5.03435		3.53806
	8.19974		8.50236		7.01175		8.16599		4.47734		4.73268
	5.64332		8.88383		8.31444		8.35665		5.1885		8.46699
	4.87061		8.35175		7.77081		7.63666		8.02878		5.81711
	3.98155		8.92074		8.03631		7.12351		6.57925		7.97906
	5.38266		8.43503		8.70311		8.4242		3.93574		4.12066
	3.85439		7.84212		8.0885		8.63166		6.23989		4.87672
	0.875469		8.70735		8.93464		9.02911		4.29865		8.4757
	7.31002		8.18356		6.05912		8.83054		4.53903		3.78419
	4.15888		7.42655		8.25759		8.03139		3.66868		5.13815
	4.45899		10.0527		2.82138		7.88428		6.69851		2.66723
	5.5576		8.82126		8.85936		8.51607		3.74715		4.93015
	6.87936		9.60632		8.56499		9.4562		5.46383		4.76729
	3.85439		8.69417		8.01803		8.19996		4.80729		4.39198
	3.24259		8.65242		4.12066		8.10071		2.8679		5.33754
	6.12249		8.01856		4.09434		7.6708		5.76832		4.57265
	5.22789		8.1166		8.34017		8.2176		6.32936		4.09434
	8.65074		7.88608		8.26091		8.4435		3.78419		8.77586
	5.54205		8.25489		7.78722		9.04206		3.90399		4.4403
	4.82028		8.95787		7.7698		6.43615		6.15358		5.16135
	3.36038		8.97826		5.43285		8.9075		7.52013		3.76584
	7.82148		9.02295		8.56697		8.42385		9.14317		3.49043
	8.62608		8.83031		8.03139		8.4514		6.13296		4.85203
	5.02913		8.52405		5.28624		8.57274		4.65205		4.17131
	5.67675		8.89946		8.33692		7.47806		6.57703		5.03435
	4.27667		5.5999		8.80687		8.71618		4.68213		4.62889
	5.43285		8.44505		6.28711		8.26462		4.06732		3.56105
	5.72489		8.40988		8.20587		8.41165		5.12871		3.80221
	8.51319		8.05351		8.11755		7.73438		4.27667		3.3322
	5.74556		9.06619		6.61419		8.2247		7.16889		3.24259
	8.50948		8.19312		8.18513		7.28455		7.12673		3.76584
	3.3322		4.45899		8.73179		7.08272		5.88165		5.27811
	6.3393		8.51013		8.67877		7.65615		1.38629		4.06732
	6.66645		9.08957		8.33423		7.60529		4.57265		3.98155
	8.41379		8.29665		4.66721		7.67749		4.88884		4.15888
	5.99745		8.36674		8.31874		4.42125		3.21084		4.29865
	5.89495		8.36264		8.79434		7.85088		4.64439		2.77259
	7.67266		9.21186		8.37231		8.14253		4.92435		4.82028
	8.06438		8.77573		4.47734		8.2526		4.70411		5.91674
	6.315		8.81498		5.79788		7.50703		3.36038		5.07517
	4.82028		9.79425		8.72023		9.11506		4.48639		8.51415
	7.04438		9.66187		6.48616		8.67836		3.627		3.70868
	6.30042		8.25364		7.81698		8.0853		5.0026		2.7213
	4.1463		9.03131		8.71237		7.0067		5.51343		8.08135
	6.03452		8.45889		4.90082		8.37342		3.80221		6.02102
	2.7213		9.29321		5.17048		7.55591		5.89495		4.18358
	4.85826		8.99019		6.01713		8.75854		4.93015		5.44328
	6.48127		9.45175		7.80335		8.54434		4.33073		5.66296
	8.37138		9.27658		9.11577		8.4906		5.11439		3.49043
	4.06732		9.16727		6.5419		8.38772		8.71932		3.30322
	4.25419		9.03389		6.66645		7.51404		4.82028		4.03954
	3.38777		8.73989		8.59371		8.47203		4.59714		4.06732
	6.80683		8.38863		8.09462		8.196		4.82028		3.6055
	4.7397		8.90978		8.47253		8.08481		5.45361		4.26549
	4.2312		8.06313		7.83201		9.00366		6.57703		7.96666
	7.39756		8.90458		8.17346		7.35039		5.24913		8.29185
	4.91265		8.8132		8.80819		7.81698		5.5037		5.28219
	9.10835		8.79773		7.78622		8.87772		6.07948		7.98725
	8.25987		8.70018		5.69575		7.49332		3.8373		3.07269
	4.03954		10.0389		7.88728		6.69059		3.21084		8.66133
	8.78398		7.66893		8.43953		8.81022		5.64049		4.68951
	3.46574		8.19489		8.33596		7.11249		5.0133		8.51351
	4.87672		8.76742		5.09006		8.03139		3.44042		4.26549
	7.93251		8.88649		8.54931		7.72947		4.2312		4.65205
	4.68951		8.83031		4.61314		8.21436		4.88884		7.83518
	6.36303		8.79567		5.60874		8.30776		6.90695		8.49813
	4.3412		8.83568		8.72219		6.78987		5.46044		5.29832
	3.49043		8.67029		8.24801		8.30933		3.6055		5.77082
	3.93574		8.04815		8.71578		8.9358		7.60609		4.69684
	6.91731		9.21529		6.58258		9.17018		4.36182		4.40183
	6.65312		8.56438		4.81381		7.88005		5.63764		4.63667
	5.27402		8.31424		9.06868		7.59045		3.6055		4.81381
	5.42583		9.10782		8.23642		7.72912		6.23676		4.65966
	6.72479		7.89626		4.1957		8.17256		4.39198		5.94017
	3.38777		8.70311		7.88277		8.70973		4.74667		9.5045
	7.3442		8.81546		3.03495		7.85306		1.56862		4.63667
	4.40183		8.49175		5.91889		6.47512		6.92991		5.29832
[truncated: 6,658 more rows]

## Sheet: Fig-3B
	loge(TMRE intensity) (a.u.) distribution
	WT		DBVPG1106-a		DBVPG6044-a		DBVPG6765-a		UWOPS03-461.4-a		UWOPS05-227.2-a		UWOPS83-787.3-a		UWOPS87-2421-a		Y12-a		YJM975-a		YPS128-a
	4.17285		6.77014		8.39276		4.76063		8.22178		6.75719		6.5164		6.36906		7.63716		8.18051		7.97627
	6.03622		4.27639		9.21216		7.31817		6.74477		7.50017		6.45893		7.44793		6.11224		7.52084		6.75787
	4.31655		5.45882		7.86626		3.72086		6.59038		7.41757		6.88513		5.5431		6.6854		6.81709		6.08306
	5.39929		6.42701		8.38793		7.27662		6.95449		8.42043		9.18856		5.94934		5.50065		1.41828		7.33255
	6.67279		4.9191		7.06675		7.14884		6.87725		9.3741		6.27809		5.28948		6.93516		6.94941		6.3589
	8.21638		6.85574		7.96956		5.46133		8.15202		8.52711		5.4282		5.79852		8.64022		4.69272		5.74901
	6.33513		5.57044		8.4354		6.74198		7.37744		6.76742		8.0007		7.62197		6.95561		8.43386		5.92599
	5.68096		6.9172		4.3244		6.7051		7.20386		9.36908		4.92341		6.3871		8.22289		7.13859		5.94162
	6.62854		6.09908		5.72812		6.39304		8.01581		7.85145		6.5129		7.17447		4.34756		8.2907		6.6942
	7.01987		4.95301		6.57815		7.47406		7.38698		7.32403		7.17763		6.17556		5.50305		6.39403		6.59926
	2.7682		6.11355		5.76948		7.14745		7.25142		8.16771		7.4643		5.69693		6.43082		8.86119		4.75557
	6.08843		4.82423		5.30131		5.88746		7.88442		8.46356		7.44242		7.02723		1.55181		8.12636		4.87504
	7.18436		6.88573		9.6946		7.49821		6.60247		6.85138		5.66881		6.49166		6.85138		8.67669		7.0852
	6.18654		5.07079		8.73596		5.91331		6.74892		6.53969		7.38112		7.17583		6.3445		7.49886		5.88254
	8.12006		7.72768		8.47482		5.957		6.94771		6.70654		7.23155		8.10645		8.00681		6.87299		6.9511
	7.49919		6.92824		9.0297		6.44122		6.9629		8.4018		6.73148		7.03971		7.12206		8.26916		6.77351
	6.86008		7.60331		7.29361		8.16854		8.1566		7.2021		7.63972		6.69785		7.77165		8.22763		5.14912
	6.61677		5.56368		6.57157		2.60786		6.76334		8.11795		7.40077		5.91491		7.10088		8.28506		6.03763
	6.54139		6.14187		8.16284		6.77957		7.19549		7.56736		6.64939		2.73046		8.46716		7.90574		4.37021
	7.97424		6.10305		8.56065		7.48934		6.80865		7.64453		6.76946		6.9888		7.60184		7.30716		6.82224
	7.18927		6.85325		2.96887		6.58551		6.48987		7.58549		8.04481		3.5499		5.93227		8.11178		4.05733
	6.65472		5.42561		9.36105		6.95898		6.81061		6.78158		5.44872		6.76266		7.71433		4.43521		7.3024
	5.36677		6.42796		7.14419		6.97013		7.61297		8.16888		7.3016		6.87725		8.02473		7.78965		5.05586
	7.50991		6.03057		6.7123		7.50082		7.38954		7.38369		7.08619		7.67293		5.38045		7.56124		6.8145
	5.20571		6.21525		5.10716		7.29761		8.33909		7.47003		5.90531		5.51974		6.89951		7.9502		7.02932
	5.96157		7.10815		6.0951		7.74494		8.16503		6.99531		6.56328		8.91881		7.43999		6.9131		6.43933
	8.49662		6.16072		7.52752		6.86809		8.20677		7.65101		4.30068		6.27809		1.55181		2.7682		7.15023
	6.04605		5.66268		4.48965		5.15254		7.09258		7.42919		5.6251		7.87527		4.61986		7.7209		5.33315
	3.87909		6.68171		6.26134		5.57269		7.11105		6.70943		5.51737		5.19595		7.45171		7.95518		6.09244
	7.92		5.8891		9.53597		7.74033		6.75856		8.68151		7.27376		5.5431		3.16125		6.92361		5.30425
	6.79223		5.94934		8.01152		7.58489		8.18084		6.25795		6.02345		6.66304		6.36298		7.81877		6.29565
	7.50213		5.91331		6.68392		7.26016		6.47634		8.37795		5.97964		7.55909		6.21643		7.84407		5.68897
	7.23624		5.65238		6.06541		7.74084		7.63403		8.1848		6.7364		6.59362		6.86501		8.02743		7.74136
	0.858662		7.42428		4.40684		6.26021		7.51442		8.44445		6.59038		6.20458		6.78024		7.62802		6.47543
	6.31718		6.4009		8.91944		6.12909		6.01051		6.84323		7.0098		8.39436		7.81521		7.06926		3.84182
	4.86144		5.55459		7.02198		7.40293		7.00124		8.27414		6.79752		5.09999		7.72142		8.55499		6.08575
	7.27089		5.66063		2.4681		7.7109		7.57948		5.17948		6.97896		4.04708		6.46722		7.4969		6.10569
	8.2442		6.31931		5.80565		7.16858		7.90705		6.7789		6.96066		8.05366		7.10912		7.61763		6.49968
	4.20857		7.43757		4.1071		6.68097		7.61792		7.84129		5.90531		6.14819		8.50059		7.88442		1.66959
	7.25142		9.21984		6.86317		6.75306		6.93401		8.77501		7.72403		6.46722		6.63554		7.71011		6.17187
	4.94043		7.20034		7.35732		6.68171		7.20078		8.20548		7.00553		5.89399		2.9381		7.70188		7.07875
	4.95716		5.6251		6.62776		7.46328		9.06374		8.56875		6.53883		5.17615		3.74903		7.15853		6.92709
	6.85262		5.63568		6.42414		7.27007		7.88598		6.72016		5.28948		7.3607		6.49345		6.33408		3.73505
	9.20726		7.44828		7.18838		7.01458		8.33074		6.69785		6.38809		7.48405		6.16693		8.15592		6.53969
	7.27499		6.05716		9.30092		5.9856		6.36501		8.07537		6.44122		5.96914		5.97065		8.08796		7.47372
	7.69438		5.12836		9.79223		5.68897		8.17604		8.67114		7.03036		3.87909		6.1731		8.47433		6.02772
	5.0521		5.78229		5.3501		6.81385		7.47037		8.06708		6.64095		9.89128		3.32251		8.29557		7.23283
	7.23836		6.847		7.28959		6.97566		8.151		3.74903		7.36183		5.66881		6.26695		5.04071		6.49434
	8.32231		4.19087		6.29565		7.08717		7.40329		7.23836		6.96735		6.49256		8.00524		5.80387		7.21607
	6.61361		6.78425		8.97209		6.24316		6.54309		4.17285		6.53198		7.00124		5.32744		8.72997		6.6638
	6.8119		6.62385		5.8891		6.89892		8.71246		6.94657		6.84134		5.87925		5.48852		8.6855		6.9601
	5.71459		6.83691		8.51453		7.11008		7.58699		4.74537		6.49613		6.01628		6.87725		7.60066		5.93696
	4.34756		7.24722		8.47691		7.82539		7.7434		7.7729		6.25001		6.67503		6.93458		7.09454		6.1355
	7.30279		5.02144		9.90613		6.54818		6.03622		8.29351		6.41259		6.36906		7.74007		8.13297		7.52116
	7.79135		7.31896		8.26188		7.66355		6.55911		8.64136		6.55239		4.99782		4.76063		8.36964		7.2912
	7.99176		6.53284		9.75247		5.31591		6.45986		8.08232		6.21289		8.40537		5.957		8.92879		4.62566
	6.4727		6.0334		4.3399		6.41645		7.62023		6.83944		6.81902		6.82609		6.60566		8.44699		7.57616
	4.71939		6.13678		6.45893		7.11297		6.82992		7.40616		6.47452		6.12909		2.03732		8.55862		4.9191
	4.75557		5.17948		8.6273		2.03732		8.54757		7.48107		7.25309		7.07127		3.97218		8.18084		7.36033
	6.59523		4.71411		8.69018		5.4282		6.89055		7.94874		6.77823		7.99355		8.52804		8.16988		6.47179
	4.88847		7.44828		4.88401		5.73003		7.56093		9.02644		6.20458		7.584		7.50732		8.91366		6.93516
	3.67706		4.3244		9.76509		6.13805		6.83056		8.15287		7.56308		7.82162		2.03732		6.09244		7.61559
	7.56583		7.63231		6.57487		6.08709		7.10283		8.71692		7.26513		4.61986		6.14693		7.65185		7.12206
	7.43861		5.73195		8.06597		6.42126		6.97013		7.33525		5.7262		5.85925		5.12836		8.04443		6.43745
	5.01363		6.88211		8.57412		6.63321		7.58938		8.7527		7.63374		5.44872		6.45801		7.58489		7.27825
	6.21289		6.33198		9.8162		7.15254		7.64029		6.40384		6.86501		2.60786		4.68185		8.26976		5.97366
	4.13581		3.32251		8.38484		7.06473		8.68311		6.3097		7.47973		6.79883		6.59685		5.83194		6.61361
	1.77495		6.68687		7.52594		5.67288		7.38149		7.62312		7.52116		4.72986		9.13289		6.55827		6.09244
	6.3731		4.64852		3.18594		7.35204		7.5495		6.18411		5.67692		6.54648		6.66905		7.78769		7.02565
	5.04452		6.97566		5.97516		5.76023		7.598		5.4204		3.46135		9.42892		6.71659		6.94031		4.83366
	4.54127		6.50499		5.60577		7.17492		6.82031		8.07261		4.77567		7.9313		10.2837		8.14056		6.82545
	7.69492		6.98444		9.49137		7.14606		7.96752		8.14912		6.50411		6.29783		5.9354		9.00581		7.29681
	6.91778		6.8495		6.43745		6.90307		7.42357		4.72464		6.45523		5.8354		8.27999		8.09176		6.79223
	7.54764		4.76567		8.63446		6.15197		7.97384		8.01542		6.72866		6.84071		7.57101		9.22025		7.66963
	6.44778		5.68698		7.17583		3.97218		6.43177		8.58245		7.26182		5.86596		6.70727		8.55952		4.89732
	4.40684		4.69272		4.49625		7.82539		6.13294		8.15829		5.68698		7.46328		5.40461		7.79598		7.06069
	4.1819		6.09111		7.49461		6.9601		8.16787		3.89121		6.92651		6.00179		8.43911		7.66604		6.19259
	5.53848		6.91369		6.6262		6.30108		7.44034		7.66272		5.68297		6.31718		6.23971		7.44621		6.6668
	3.13593		6.22581		9.42674		7.92705		7.67101		7.16949		6.7565		6.48628		7.71222		8.39503		6.75924
	7.95248		6.32883		7.36295		7.2713		7.19814		8.78165		6.10305		5.02144		7.18123		8.12199		6.1986
	8.3013		6.53456		7.48703		6.95954		5.50545		7.45102		6.90129		5.80209		5.8354		5.95088		6.79024
	6.71802		5.43595		7.68629		6.71517		6.07902		7.77116		7.47037		4.61403		8.00228		9.08423		5.64407
	7.75914		5.67894		6.19138		7.63374		4.57223		7.25684		5.71847		6.04185		6.03481		8.35891		6.94487
	3.42361		6.39007		7.0267		7.30517		7.16128		8.02319		6.20219		7.11872		6.60965		8.62062		6.71158
	4.25149		5.957		7.38479		6.36805		6.27809		8.07537		8.05946		5.87925		6.27476		8.31077		8.02009
	5.60793		6.68097		7.92171		6.51901		4.55996		8.43116		6.4663		5.02144		6.17433		7.59444		7.2585
	5.86763		5.94162		4.8929		7.34139		7.15531		8.82533		6.94316		6.2351		5.77132		7.1493		6.24887
	4.27639		5.16273		4.87053		7.31661		7.21694		6.50939		6.02488		6.7385		9.03351		7.35166		6.54054
	6.14187		6.03481		8.73083		6.82353		7.37152		8.3524		7.1977		4.60227		6.36602		8.39556		7.52116
	8.59004		4.83366		9.19283		5.8809		7.5253		8.43898		6.107		5.78047		8.8216		8.30568		6.61993
	4.81947		7.0204		7.33871		7.49033		6.62307		2.90635		6.24316		7.51699		6.1998		7.77859		7.44793
	6.85387		5.95547		6.58469		6.94487		6.67354		8.0561		6.82929		5.88254		6.85013		9.07428		6.83311
	5.59924		5.09638		9.53081		6.31505		7.94582		6.54818		6.70654		4.4628		4.3399		7.34558		5.04452
	6.90544		5.90209		5.77682		6.74129		7.13059		7.95144		5.15254		7.22642		5.85249		7.34444		6.86378
	8.08305		6.7385		7.04333		5.80919		8.72519		7.57495		6.78425		6.45523		7.58159		8.60561		5.81449
	1.66959		7.66991		4.24305		7.20736		6.99152		8.33244		7.19239		4.52222		6.35069		7.57162		6.88995
	8.27369		6.8312		8.54677		8.9262		8.97932		7.97769		6.09908		7.33139		7.30834		8.17504		6.55659
	7.19283		6.76402		6.52854		7.51346		7.19814		7.08025		7.43304		0.165514		7.0007		5.14912		6.77149
	5.92284		6.195		10.1123		6.38908		7.81711		7.44276		6.5164		6.8426		9.96636		8.89507		8.34849
	7.97688		7.36818		7.70985		5.61009		7.04898		7.88886		7.13812		5.50785		7.24259		9.19553		6.92361
	4.11676		6.64018		8.28253		6.6638		7.14093		8.73577		6.99477		7.14838		7.70428		8.20902		3.82908
	5.73577		6.55071		3.16125		6.54224		6.51553		7.72011		6.9926		8.13815		6.83944		7.42639		6.33513
	4.74023		6.14567		9.57855		7.80275		8.21924		8.13833		7.31739		5.29837		7.49592		8.09841		5.0018
	7.8755		5.7841		4.85226		6.0334		5.89399		8.02512		6.38112		6.7371		6.34138		7.69921		7.13201
	5.88746		8.26401		9.19559		7.31268		7.28353		6.21878		5.0018		6.86747		5.76579		8.78391		6.46722
	7.73905		3.67706		8.47875		6.93573		7.87482		8.57457		7.02145		6.91837		5.09277		7.11872		6.58795
	7.20736		4.50281		4.98982		7.06069		6.83944		7.64114		6.14313		4.27639		7.24596		8.02724		5.15934
	7.32247		6.38908		8.08995		6.90898		6.97179		8.0531		6.15823		4.39235		6.35992		9.00486		6.35172
	2.83966		7.16994		7.29641		7.2178		5.98708		7.27253		6.33408		5.4282		8.88793		6.17064		5.28948
	5.65858		5.99593		7.06574		7.99713		6.3		7.55939		6.2293		4.24305		6.76674		10.2362		7.0852
	7.05409		6.83374		9.84795		7.19549		9.18087		6.04465		4.55996		1.26413		6.0951		7.95165		6.44404
	6.73359		6.01772		6.39796		6.98826		6.45337		8.49578		6.39796		5.76208		7.26595		7.58129		5.85418
	7.43861		7.97971		6.91895		9.14745		7.92598		6.04185		7.2585		6.31718		10.4522		7.95869		5.24069
	7.9454		6.81126		9.18463		7.19416		7.62485		7.85854		6.93573		6.07088		6.10437		8.47581		7.30398
	5.09999		5.81625		5.3473		6.56161		9.41195		8.39809		6.63786		6.60965		6.01628		8.38524		7.0392
	5.66063		2.83966		4.08749		6.41065		6.2443		4.1545		6.54648		6.8607		7.80251		7.80852		6.82417
	6.53969		7.80323		6.15573		6.50764		7.03245		5.04071		5.93851		8.11266		9.26933		8.89919		6.05162
	6.02915		5.23756		5.60359		5.09999		6.35583		7.03401		6.61598		4.6873		4.52222		4.72464		6.19138
	8.58399		6.93055		7.23411		6.7647		7.07577		7.64453		5.4099		7.54857		5.78047		7.34901		5.26233
	6.36704		4.24305		9.01194		5.89073		3.91502		6.96846		5.818		8.3256		8.23078		8.62751		6.13038
	6.98498		6.57569		6.26134		6.23278		7.62859		6.22697		4.61403		7.72507		6.25115		7.55909		4.86599
	6.74198		5.71264		5.3303		7.12918		6.54902		7.81043		5.86596		6.97345		4.73506		5.17281		6.20577
	6.25342		6.25908		7.56583		6.44404		7.02565		7.46936		7.3543		5.82674		8.58344		8.25607		7.03088
	6.03763		5.41254		6.34346		7.67922		7.59147		7.05051		7.302		4.60817		8.99085		1.55181		4.12633
	6.89534		6.01195		8.63194		7.40616		8.02763		6.85511		7.01723		7.0852		5.94471		8.31295		6.25682
	5.4282		9.19397		9.38442		6.77351		8.56752		7.8503		5.14912		5.55687		8.5602		7.04126		6.54224
	4.59036		6.12781		9.01725		7.59266		4.1819		7.26843		6.54309		7.0965		7.12396		7.34444		6.50411
	6.77014		5.28948		5.9165		7.09942		6.3871		6.99369		7.03036		7.93721		8.21222		7.87885		7.50862
	5.95241		8.01152		6.08843		4.64852		7.99991		6.39894		6.73289		7.62687		9.85041		8.71498		7.82019
	5.25311		7.16903		7.53164		7.33947		7.64988		7.50408		7.04229		5.78047		10.2687		7.77612		5.54079
	6.60166		5.65445		7.81545		7.17266		3.40419		7.46734		7.11345		4.02624		7.88175		7.1192		7.584
	7.29841		6.58795		4.16372		7.31857		8.80111		7.02932		5.4563		5.44872		6.16693		5.68497		7.17176
	3.74903		5.61009		3.86682		6.34346		7.28838		9.19751		6.2803		2.69124		5.61009		7.88553		6.76878
	6.59604		6.48808		7.80275		7.20517		6.72796		6.83374		5.87262		6.75924		7.40688		7.55631		4.73506
	6.97013		7.43687		8.20612		7.10767		6.90662		7.54888		5.49096		4.1819		7.44483		9.22346		4.1452
	5.07079		6.02059		6.56743		7.01934		5.84398		7.12111		7.6306		7.37522		7.42569		6.39106		6.65548
	7.08619		5.17615		4.11676		6.70003		7.38881		8.91175		7.26554		4.19976		5.75463		6.9294		7.04693
	7.48902		7.22685		7.64397		5.92442		6.54309		7.80876		4.54127		5.87096		10.0816		6.31291		5.56141
	6.44965		7.81521		8.21749		7.34939		7.81282		7.42814		6.29891		6.36298		7.92577		8.77847		6.76946
	8.20193		6.90898		4.95301		6.31718		7.2409		7.49395		7.0392		6.50939		7.04229		7.08914		5.41254
	4.4491		6.83311		7.63858		7.04538		7.03712		7.41117		6.49166		7.49625		7.29521		7.57374		2.51689
	4.12633		6.16321		4.54127		6.35583		6.86625		7.59533		5.82325		8.12566		6.0134		8.71846		5.19268
	8.66016		4.88847		7.50082		7.52084		7.55137		6.17064		7.12586		4.67637		9.60136		7.85397		6.47906
	6.83691		5.53382		4.69272		4.6873		8.68381		7.69358		6.97951		6.83755		6.00906		8.07003		6.76742
	4.76063		7.68195		7.51056		8.34989		7.22556		7.38296		7.4204		2.4681		7.46936		8.0941		6.13678
	7.52147		10.015		8.56797		7.55847		7.83384		7.68629		6.96457		6.18411		5.66268		8.09895		6.96846
	5.92284		6.47725		3.97218		6.31612		7.02145		4.40684		5.8809		5.42561		6.47634		7.91591		6.34346
	7.61472		6.18654		8.29778		6.84449		8.29498		4.08749		7.06976		4.70348		9.05331		8.22495		6.51027
	6.64862		7.17808		5.92442		5.84909		7.61093		6.60885		7.87617		6.76402		7.32169		5.83367		5.76394
	5.31301		5.3101		6.64862		4.81947		6.52162		7.94519		6.08843		6.4663		6.69712		8.14434		5.57044
	7.19637		5.36125		8.55465		5.73003		4.36272		7.49756		8.79057		3.9497		7.79355		7.68683		8.11266
	7.29641		6.17923		7.7719		7.1713		7.7719		6.22697		6.39007		5.93384		5.75089		6.82353		7.10719
	7.2908		7.50732		8.28178		5.39395		7.07577		4.77068		7.47506		5.01363		8.15609		8.14981		7.33602
	3.51542		7.20517		10.0266		5.6251		6.6713		7.49886		5.96612		7.7714		8.46716		8.09931		6.82673
	7.9626		5.91331		9.72517		6.91251		4.2173		6.71517		7.33409		4.8929		6.87604		7.97769		5.75089
	6.37912		6.92419		10.0999		7.20166		6.4365		7.00499		3.84182		7.78007		7.80275		6.01772		4.23454
	5.36677		6.79091		4.78557		6.35583		5.80387		6.45244		6.88634		6.23856		8.28892		8.07555		7.30001
	6.61835		6.17433		9.37004		6.32883		8.06039		7.88464		5.90852		6.56161		9.18838		8.89999		6.66905
	7.70028		6.37812		6.26359		7.2468		6.97013		7.07427		6.74685		4.94883		7.28596		7.5005		5.0018
	2.18042		4.37021		5.3529		6.90603		7.94414		7.69088		6.18289		6.22581		5.91967		8.902		6.0334
	5.78953		7.39354		7.45171		4.94043		7.58219		7.80009		4.8929		5.50065		8.69976		7.69546		6.65015
	4.56612		7.3678		6.82673		6.31291		6.30432		6.94373		7.2676		4.34756		7.87863		7.72897		3.32251
	7.22169		6.77284		7.4643		6.87115		7.73879		8.80475		5.85249		5.32744		7.56705		8.48767		6.02202
	7.25809		5.12836		8.25023		7.22255		6.06404		7.87975		6.53883		7.37004		7.56949		4.1071		8.151
	5.4204		7.79087		8.10307		7.60537		6.84762		8.82125		6.92361		4.19087		8.47531		8.13487		6.84197
	6.49702		6.86193		9.48359		6.39007		7.35014		8.4801		7.09111		6.27698		8.43936		8.11936		4.23454
	5.49096		8.04953		8.98414		7.10331		6.14187		8.00208		6.62776		6.17678		3.77643		8.75698		6.95898
	8.56054		7.25183		5.97065		7.17853		6.90722		6.78024		6.71874		4.59036		7.35052		6.51027		6.06541
	5.74146		6.16693		6.95786		5.88419		6.57815		7.96568		7.50473		7.01987		5.825		6.98608		7.8385
	7.53164		6.97621		5.51024		7.15531		5.94626		5.63146		6.89951		4.64285		5.10716		7.72949		7.71512
	4.35517		5.80387		7.51217		7.39897		7.28191		8.33428		6.71588		5.74336		7.17943		8.49409		5.26538
	7.76642		7.04281		7.62052		7.02145		7.75308		7.42533		7.11105		4.60227		8.22242		7.2489		5.74901
	4.57223		6.84386		8.76705		4.85226		7.48206		7.41046		7.03609		5.27146		9.18566		7.13295		5.79673
	6.24086		6.81773		7.02355		4.98982		6.99152		8.10021		5.93227		5.14569		8.56505		6.91075		5.74524
	7.40437		4.78063		7.66189		7.66078		6.94145		7.54046		6.41065		4.01566		6.86932		7.96157		5.80565
	8.37957		7.18392		5.55914		6.99477		8.47359		7.12681		6.86563		6.21525		5.79852		8.54264		5.91012
	8.9648		5.9165		5.21537		6.61123		7.7776		8.21829		7.7916		4.54754		7.391		5.91491		6.34346
	6.47543		6.04185		6.16693		5.64198		6.99423		7.11008		7.02984		6.85325		10.0502		7.85259		7.23624
	4.39235		6.91954		6.04465		8.01562		5.76208		6.15823		5.19268		5.40196		6.25456		6.75444		4.62566
	-0.527633		7.58519		7.86739		6.78492		6.08037		8.17853		6.52075		6.24086		5.8891		7.52594		8.02319
	7.2165		5.75837		6.03763		7.64651		7.73596		6.23394		7.21129		5.84569		9.83546		8.06318		6.33408
	5.12486		5.84739		8.79639		6.74338		7.41046		6.38212		6.05716		5.47872		8.36484		8.224		4.64285
	6.39501		5.71459		6.55994		7.08371		7.23794		7.76941		7.05205		6.97841		8.76466		8.54918		5.31881
	7.08668		7.13295		8.43578		6.40286		6.88694		7.65241		5.07817		7.55816		3.74903		8.41978		5.52446
	7.6153		6.86131		8.36388		6.92012		6.36094		7.20736		7.49494		5.73767		6.83374		8.18282		6.47452
	7.3111		5.63988		4.1545		6.45616		7.45615		8.85641		4.76567		6.52249		5.67692		6.93688		4.77068
	7.3509		8.05834		9.81955		6.6854		6.85511		7.98415		6.82609		5.11072		9.74119		7.78597		6.90781
	7.50538		4.58435		7.35393		7.57798		6.96791		8.32389		6.6942		5.52446		9.01603		7.21694		7.76291
	1.77495		6.20339		5.07449		6.93055		8.34513		7.33409		6.89594		4.23454		6.99855		8.02377		5.56819
	4.98982		6.88453		5.35847		7.61122		6.72371		7.40113		6.96513		6.45244		8.38834		8.57323		4.60227
	7.40509		7.79184		5.07817		6.92477		7.29721		6.93228		6.91369		6.45244		6.59362		4.47631		6.31931
	4.91478		3.02772		7.82185		6.91251		7.53228		4.85686		6.84825		7.10088		6.84386		7.69867		6.26695
	7.12015		7.29481		9.08122		7.49297		7.76115		6.76061		6.89594		4.61403		6.88453		8.89248		7.05816
	8.3755		7.87303		8.63635		6.50145		6.38809		8.18117		7.00446		5.65445		7.98595		7.49526		5.97666
	5.35847		5.6749		7.52752		7.06473		7.5495		5.47872		6.97786		6.85574		10.235		8.2202		4.94464
	4.8929		8.182		9.27626		7.16585		7.29281		6.97179		6.26807		5.96157		7.72377		6.88875		5.39662
	8.66851		5.70874		6.75375		6.08709		6.32883		7.08767		6.98826		5.25619		7.27947		7.58849		6.88029
	6.06404		4.58435		9.36469		6.47906		7.41757		6.17064		6.87725		8.06393		9.6322		8.43283		6.37209
	4.1071		5.92757		5.50545		6.21052		8.16687		8.52839		6.29238		5.38587		6.63631		7.80395		5.95394
	5.02144		6.05854		6.72158		6.1694		7.86105		6.8495		7.1287		6.2117		7.55137		9.11202		7.06018
	7.26554		6.55576		8.17571		7.01352		8.08269		8.56606		6.99369		5.38587		5.0292		8.62561		6.6262
	3.9497		6.88453		6.22347		6.59845		6.54394		4.87504		6.1731		6.14187		7.3452		8.50681		5.11072
	5.44363		5.80742		6.22113		6.82801		6.83565		7.10719		6.3741		3.81617		6.97841		7.70188		6.51027
	6.6301		4.81947		5.09277		6.46722		7.02198		6.77284		6.61282		7.6326		8.69068		6.90781		6.8495
	4.70348		5.01754		6.41549		4.72986		6.62464		8.11496		7.35204		6.0047		8.0805		7.25642		7.65185
	6.14945		6.17433		6.89951		7.5467		7.36557		7.57798		7.08816		7.45102		5.0521		6.68171		5.1861
	4.90171		6.89951		6.1355		6.35583		7.59087		6.67652		6.36501		6.67205		5.97065		6.16197		7.00177
	5.82674		7.14093		7.16722		6.93688		8.22999		8.58001		6.2351		6.40968		6.86131		8.07225		5.91967
	5.38316		6.31825		8.59835		5.86428		7.81545		6.02202		7.31817		4.87504		6.41838		7.35393		6.39205
	6.89773		7.76492		6.93343		6.54054		6.50939		7.49231		5.90531		5.0521		6.84637		8.01386		3.8031
	4.52861		5.78229		6.72725		5.76763		7.81425		8.70241		9.65117		6.11094		6.57487		7.97485		7.75358
	6.47997		5.2865		5.06708		7.0007		7.09405		4.86144		5.88419		4.73506		8.2336		7.2178		7.43687
	8.30758		6.12523		5.21216		6.27031		4.50932		5.8891		7.75105		5.71653		9.35906		8.4414		5.83884
	7.82539		5.70088		4.50281		4.54127		4.26816		4.16372		6.91662		7.83103		7.23496		8.27939		7.40545
	6.49434		4.03672		6.85449		7.35204		7.76941		4.36272		7.01829		7.4101		7.2247		8.30772		4.48965
	6.29565		5.53848		4.59633		8.06411		6.13422		5.71847		6.25342		3.53281		6.93745		7.1704		5.60577
	5.60142		4.55996		6.07224		8.23062		6.86932		8.01386		5.72234		3.23357		7.90835		7.79403		5.52915
	5.52681		5.91331		3.66202		6.94771		6.66304		8.52512		6.00179		5.26233		7.12681		8.15541		6.39205
	5.5431		6.7371		5.83884		7.6925		7.23794		7.79379		6.06951		6.84888		6.30432		8.09302		7.47137
	8.33059		6.87482		6.15823		7.68683		7.38954		8.12932		4.95301		6.31398		7.25726		8.88115		6.4365
	5.0521		6.58388		7.09454		7.11345		7.43583		6.74407		4.48965		8.6795		4.89732		7.76767		5.79493
	7.29801		6.15071		8.30612		6.70438		7.33448		6.61914		6.88995		5.96914		7.32636		7.76767		7.35279
	5.49581		5.0521		8.27654		7.19194		7.62744		7.45751		6.70654		8.28357		7.4165		4.42819		6.51901
	4.50281		6.35172		4.88847		5.29245		7.93995		7.25058		4.53496		5.90209		2.18042		7.00713		6.25569
	5.13185		5.96914		8.47814		6.59523		7.26265		3.4797		4.80509		7.04384		7.28878		7.56246		5.42561
	5.68096		4.72986		7.37189		7.38772		6.61598		7.34939		7.2447		4.48965		8.25362		7.89393		7.49165
	3.84182		7.31622		4.42113		7.27458		4.20857		8.49915		6.81644		5.54079		7.02932		7.41224		6.7364
	6.75306		6.91662		3.63125		7.26595		7.76065		7.43513		6.90011		6.80015		7.90357		8.73568		4.9777
	6.78825		7.65437		9.04915		7.13765		7.49231		8.27504		7.19549		6.57404		6.32883		4.47631		8.13867
	4.16372		7.40795		8.14039		6.31931		5.86428		7.11297		5.51737		7.09796		5.63779		6.94827		6.29129
	5.23756		6.36704		9.19475		7.46969		9.15944		8.51382		6.96178		6.80212		6.70799		8.43693		5.29245
	4.94043		4.74537		9.43549		6.0047		7.2908		6.66002		7.03401		6.25001		8.07132		7.11153		6.71373
	6.61914		7.8301		7.44931		7.68846		4.23454		8.9921		5.58826		7.47439		0.165514		7.30359		6.2351
	5.76023		5.29245		4.9777		8.08904		5.89724		8.69661		6.47997		6.46813		8.14554		8.22873		7.60478
	7.20605		6.4009		9.58652		7.68764		6.70582		5.39395		7.0546		6.34553		5.39126		7.43024		6.14313
	5.48118		6.03481		8.07647		5.89561		6.59281		8.22826		5.51974		7.9667		7.96445		7.41188		5.40461
	4.89732		6.49434		6.35069		5.09999		7.22341		7.4784		6.12265		5.8693		7.27662		6.39304		5.17615
	6.4431		6.93055		4.82895		7.04075		7.87505		8.4428		5.85756		5.74901		5.515		6.27254		6.78158
	3.81617		6.96234		7.93257		5.79314		7.35995		4.60227		7.2178		6.55071		5.78047		7.84569		7.89107
	6.11746		5.94162		6.54987		7.57798		7.7508		7.09454		6.3861		5.57493		5.83712		8.53026		6.28691
	8.39048		6.13678		7.51699		6.57157		6.71588		7.2178		7.41473		5.14569		7.32752		6.61044		5.51737
	5.9037		5.20247		6.02488		7.12349		6.63166		8.18398		6.64556		6.33617		7.37559		7.44311		4.06749
	7.06826		4.95716		7.51378		7.24512		7.5141		7.26224		7.62139		5.14569		7.25142		8.19706		5.28051
	4.30865		5.74146		6.91369		6.77419		7.2489		8.13608		4.89732		6.20577		5.09277		6.94714		6.90011
	6.26359		6.8067		8.32618		5.89724		7.22813		7.77165		5.79852		6.42222		7.42357		7.19814		6.64402
	6.8067		6.02059		4.1819		6.0736		6.45616		7.70294		7.10574		5.12836		5.51262		7.03453		6.93859
	7.19283		6.70076		5.97366		6.57979		8.63215		7.42146		2.80457		6.03481		7.58669		5.04832		6.27476
	9.09858		7.21303		8.41978		5.13879		8.24622		6.96902		5.22176		6.48987		6.42318		8.16787		6.52162
	4.36272		7.01987		6.03057		5.96005		7.02303		7.46666		6.83501		6.27031		7.67375		7.41792		6.98225
	8.11196		6.92593		9.15046		5.43079		7.18123		8.05853		7.2247		5.9037		5.59266		7.97017		6.77081
	8.33994		7.06725		5.28948		7.65716		6.91954		6.8312		7.16903		5.46133		6.68981		9.4422		7.16265
	5.70088		5.34166		5.70482		7.15853		7.8308		4.61403		6.27365		6.38112		6.93171		7.61414		8.17902
	3.98323		6.66002		9.36115		7.64763		6.48808		8.30656		6.87847		5.64407		6.65244		6.57404		6.97786
	6.93113		6.2902		5.07817		6.84637		7.60889		7.69277		6.57239		6.62071		4.99383		7.54733		5.33884
	5.66881		10.4617		4.8929		5.75837		8.10805		3.9497		6.6144		6.77957		7.74953		8.43181		6.58551
	6.18289		7.51796		9.92114		7.67403		7.28757		6.56826		5.17281		3.42361		7.79573		8.20805		7.15807
	4.17285		5.44872		7.40329		5.9974		8.01873		6.66455		5.49096		6.59845		6.41356		8.59322		5.5221
	7.18033		6.8809		5.51737		6.43745		7.02932		8.03854		7.18436		4.57223		7.75964		8.45931		6.41934
	6.77823		6.53627		7.06625		7.84984		7.14046		8.31872		7.41721		6.3393		5.77682		4.63142		7.53133
	8.99971		6.98389		6.05716		6.26471		7.74468		7.07227		4.56612		5.40196		6.82481		7.47171		6.6668
	4.63142		5.70088		8.52277		6.69785		6.06267		8.5551		5.7262		6.10437		7.87145		7.87773		4.96954
	6.56909		8.65493		4.96954		7.45478		7.30557		8.37673		6.81709		4.88847		6.85698		6.80995		6.87482
	6.66455		6.16817		2.41681		6.62464		7.62945		6.36602		6.13932		5.30425		6.33198		7.55878		8.14297
	6.21407		5.825		7.37596		6.80539		7.99753		2.56341		5.96309		6.25569		5.87925		7.77884		5.52681
	4.67086		7.25225		9.84926		6.08441		7.68981		3.4797		5.83021		6.41645		6.58551		7.20867		5.91331
	7.2585		6.53627		6.22347		5.74336		7.28717		8.51606		7.45921		5.8003		6.75787		9.12848		6.32037
	8.25484		6.70871		5.98708		6.86008		8.26324		6.18167		9.03358		8.57077		4.87954		5.51024		7.35506
	6.62698		6.30432		8.69018		6.27476		7.50667		7.9313		6.50322		7.18794		7.78401		6.59281		6.88995
	3.64675		6.84386		4.20857		7.43199		6.70654		4.67637		6.93802		7.45649		7.09062		7.49657		6.66755
	7.00713		7.41188		7.24005		6.1444		5.42301		7.8842		6.25001		6.20815		5.59046		7.34444		5.44618
	7.10477		6.88513		7.46091		6.12652		6.63244		7.84984		7.60976		3.32251		7.97648		8.71798		3.38439
	6.49345		6.64862		3.97218		5.64615		7.27539		7.11393		8.4648		5.4204		6.25342		7.28434		4.27639
	6.35069		5.7565		9.16204		7.88974		7.61356		6.14819		3.97218		6.92477		8.59965		6.63321		6.50145
	3.73505		5.91172		8.93043		7.35204		6.77284		8.48633		7.22341		8.15168		6.73429		7.55755		7.69626
	5.12836		5.87925		4.88401		7.20254		8.18167		8.52559		7.29401		6.40968		7.93002		4.3399		5.0018
	4.86599		5.94626		7.86332		6.58632		5.45882		6.55239		5.8693		6.24086		10.0366		9.01467		8.07298
	6.18654		8.27218		4.35517		5.42561		8.02647		7.89525		7.44552		5.66473		7.26141		7.5414		6.22581
	3.86682		6.16445		8.43116		6.42986		6.59281		8.16754		7.2585		5.04832		8.66648		7.38002		7.95331
	6.27809		7.17583		7.76542		5.63357		6.86809		8.77255		7.14186		4.90171		6.47906		8.22621		4.70881
	5.6989		6.58143		7.2815		7.25642		6.16197		7.49788		3.98323		5.06708		5.35847		6.83691		5.95088
	4.62566		5.87594		6.0134		6.3741		2.41681		7.70773		7.10428		6.30324		6.30108		5.63146		5.52446
	4.37764		7.86354		6.71158		7.05307		6.67874		5.78592		6.24773		2.99873		8.97141		7.40724		6.70438
	5.90852		5.54541		6.29129		7.64199		5.32169		7.39897		7.17988		5.94626		7.46666		5.8693		7.2811
	5.60793		5.16273		9.6492		7.80154		7.17808		7.49231		6.29891		7.58609		4.94464		5.13879		5.14569
	7.68059		6.75375		7.85854		6.84071		7.48107		8.28208		6.67055		6.50499		7.10574		7.72455		5.18279
	5.49339		4.8147		7.32869		7.06625		7.10912		8.40827		6.54733		7.3939		6.91075		8.18825		6.78359
	3.78986		6.50764		5.89886		6.80212		7.27417		6.73007		5.09999		7.74876		7.48405		8.14656		5.19268
	7.01033		6.09643		8.0076		7.21953		6.77284		8.06393		5.2775		5.40726		7.19814		7.67731		5.42301
	8.75298		5.90047		6.47452		6.82801		7.19504		7.46328		6.49345		4.94883		5.79493		7.55755		5.87594
	5.59046		6.98334		8.44572		7.4774		7.4867		8.05535		7.06625		7.31582		7.50926		7.60184		7.17628
	6.94941		6.87482		5.94934		7.4774		7.3577		8.07445		7.0965		4.77068		4.97363		7.65465		6.40774
	6.98608		7.42216		5.42561		7.04126		7.07527		5.02144		7.20693		6.04605		8.1969		6.9363		6.48898
	3.5995		6.6638		9.64558		5.83712		6.55743		7.78622		4.73506		4.74537		9.29389		6.60247		7.15531
	4.25986		7.51088		6.82865		7.65521		7.01776		8.3464		7.65911		6.87968		5.34166		7.97017		7.23155
	7.00713		7.18571		9.95295		7.07077		6.35069		8.03453		6.43933		6.17678		8.12111		8.13556		5.94471
	6.13038		8.01503		5.47378		7.61035		9.70537		6.47906		6.28581		6.42318		5.74713		8.66485		6.54054
	5.68897		5.48118		7.30438		5.69693		8.00661		4.74537		6.95054		7.50732		8.38322		7.82398		7.22212
	5.66881		5.3529		7.75838		6.77486		6.64479		7.00231		5.44107		7.45376		7.20122		8.34247		6.31825
	4.58435		7.77389		7.73956		7.13765		5.89073		6.71588		6.57157		7.62399		7.08914		8.19348		6.6942
	6.50764		6.39993		6.40286		7.51475		7.45751		8.1593		6.75169		6.80995		5.58826		8.20225		6.51115
	4.1545		5.97366		8.07812		6.31077		6.95505		7.58009		6.18532		7.97241		7.47439		8.55066		7.08272
	4.26816		6.6683		6.77621		7.27294		6.78559		8.10628		7.84268		6.27031		6.21643		7.25726		7.61472
	6.22347		6.55155		4.98176		7.598		7.46328		8.01191		7.10477		4.19087		7.20078		8.7731		7.13484
	7.89371		7.0459		7.3592		8.19283		6.7051		4.12633		7.23878		5.8693		6.01915		8.02531		7.1704
	3.9497		6.41259		9.06073		7.70985		6.93516		7.59177		3.44266		6.94827		7.20693		8.99825		6.12394
	7.39572		5.83712		6.69566		6.26359		6.71445		7.13012		6.67726		7.82421		7.2811		7.40293		7.06423
	7.41544		6.57569		7.8315		8.13729		7.55137		7.37707		6.94827		4.39235		7.77439		8.51026		7.01458
	6.08843		6.2293		7.33525		6.91075		9.1738		8.4965		7.54608		6.07496		6.87054		7.9129		7.24554
	5.39395		6.23971		7.69921		7.0167		7.08914		7.62974		7.4204		6.52682		5.78592		8.24745		6.77284
	7.8322		3.87909		5.72234		4.69272		7.89173		8.25989		7.34635		3.961		7.19858		6.92709		6.24887
	4.19087		6.16817		7.24132		5.4713		5.93384		7.23921		6.17187		5.04071		6.55743		7.68683		6.39205
	5.63779		6.39993		10.2345		7.02932		6.35378		6.45151		6.88332		6.04744		8.5025		8.90577		5.4282
	4.06749		5.99004		8.73254		4.96954		8.28387		7.02775		7.32946		5.11781		6.44872		8.60604		6.4727
	7.14373		5.60793		9.26134		4.53496		7.03453		8.31338		5.11781		6.45986		7.97769		7.63231		6.39796
	6.23625		6.05578		6.72229		7.07577		7.6925		7.24048		7.21347		5.49581		6.01195		7.12349		5.29245
	5.90691		5.50305		3.97218		7.43059		6.89832		6.35685		6.55071		9.68749		6.21052		7.75206		8.0977
	5.94934		5.34449		5.94162		5.4282		7.97911		8.88956		7.00231		5.3501		6.56909		7.3016		7.40831
	7.18838		5.76394		7.89173		6.65244		7.63688		8.47371		6.81902		4.49625		7.20474		6.68097		7.73079
	7.1038		7.33332		6.73919		7.88041		7.35128		6.38312		9.59968		7.03245		8.31497		8.15913		6.6653
	4.91478		6.8312		7.72403		7.69974		7.25142		8.69917		6.4009		5.43595		3.18594		7.76667		5.8776
	5.31591		6.81838		8.31569		6.15071		8.71663		7.40509		7.02408		4.42113		7.26719		7.20736		6.34553
	6.94884		6.91486		7.1428		6.32778		6.4251		6.94031		6.15197		6.22697		7.87168		7.99116		7.17447
	6.07496		6.2792		7.00766		7.04898		6.10437		7.09699		6.85511		5.36125		6.28581		8.59311		5.52681
	7.50829		7.47205		7.30438		5.73957		7.93384		5.01363		7.68737		6.77957		6.90426		6.657		5.28051
	7.41046		6.33513		9.4226		6.36906		5.6187		8.03797		7.13624		4.90609		7.09258		8.33145		4.45597
	5.48118		7.07027		7.1915		6.94373		6.53798		3.82908		7.25142		5.53615		7.35694		7.40329		4.85686
	5.46882		7.08569		9.26515		6.11876		7.75964		8.50561		7.373		7.5057		6.07496		7.63117		6.50322
	6.58306		5.59046		6.22113		5.90691		8.30539		6.78158		6.9084		5.60142		8.05084		8.14998		6.14819
	5.63146		6.36399		5.89561		6.22814		7.21086		6.57157		6.42605		7.3115		7.15439		5.72041		7.06574
	6.3548		6.85636		6.396		6.78692		6.95392		8.5534		6.42318		6.03904		6.85636		7.46531		5.11072
	5.46882		4.9777		6.08306		6.58714		7.89964		9.19971		5.87594		7.26966		7.10088		8.90136		6.65927
	4.59036		5.84055		7.26058		7.90095		8.10556		6.18167		6.84762		5.0521		6.50145		7.1493		7.22083
	9.1487		7.24428		6.34138		6.92245		6.62932		8.07904		6.61282		7.3592		6.89713		8.61454		4.61986
	6.6262		8.29734		7.4541		6.98334		8.86819		7.26306		7.30676		6.107		6.57815		7.85831		5.85079
	6.14313		6.91134		9.45379		6.51378		7.32091		7.55847		7.10719		5.0292		6.37007		8.18726		7.33255
	6.73007		8.29513		8.82637		7.38516		6.72442		7.38369		5.47872		5.87096		7.51475		8.12111		5.29245
	6.23856		6.02059		7.28798		7.16539		6.78492		7.17808		7.35882		5.97516		7.10912		7.76241		6.65927
	5.85756		8.08414		5.73957		7.57798		7.08124		7.60331		5.91331		6.62228		7.43339		4.23454		7.78155
	5.91491		4.80509		9.03639		6.8576		7.32907		7.62658		6.18411		5.84739		6.32249		8.42652		5.58161
	4.54127		6.99477		8.15575		6.67949		6.89653		6.9926		5.57493		5.32457		5.49823		8.03606		6.4251
	9.11948		5.14912		7.97708		6.47543		4.60817		4.25149		6.63399		6.91134		6.53883		8.11337		6.59119
	5.39929		6.22347		7.74084		6.86625		7.76115		8.38793		7.57888		6.83247		7.04023		8.1943		4.75557
	5.93851		6.18896		7.7326		6.9888		3.86682		8.416		7.13059		6.11746		4.9858		6.65851		7.33832
	4.26816		6.12781		8.02955		7.85877		8.65667		8.39316		7.05102		8.10128		7.56124		7.62916		7.36892
	5.65031		6.57239		6.48538		6.76606		7.14977		7.53795		5.60359		6.50322		6.49166		8.39222		5.76394
	6.97455		4.23454		9.31515		6.01484		7.13765		7.9718		6.58551		5.957		8.01171		8.16988		7.38479
	5.12134		7.38075		4.19087		6.8576		6.32461		8.27564		4.45597		6.00033		7.05307		7.67813		6.92012
	8.3256		4.37021		6.56494		5.46133		8.51417		4.92341		7.31307		8.47654		8.03587		7.88731		6.98662
	8.44762		2.56341		6.25001		6.32883		7.29881		8.74296		6.43271		6.60086		6.59038		7.24848		6.91016
	6.67949		6.18289		9.42016		8.19609		7.74927		7.33332		5.38045		7.80564		5.66473		7.40257		6.72725
	6.62385		4.87053		8.10021		7.17447		7.56093		6.26134		7.0167		6.35275		7.2811		6.71874		4.3399
	8.57066		4.1452		8.79326		7.03764		7.82091		8.45153		5.99299		4.82895		6.24545		8.89927		7.69411
	4.90609		5.87925		8.82247		5.85079		6.32249		6.7647		6.84825		5.92757		8.75046		6.59604		6.47634
	5.22811		6.74546		7.55229		5.57044		7.507		7.04075		7.33409		6.08037		6.6713		6.80995		7.15069
	4.24305		6.20577		7.1493		6.87604		6.57404		8.53676		6.6942		7.17763		7.00926		6.97731		6.15573
	7.26966		3.93828		7.11537		7.04744		7.2043		8.56674		6.77486		8.93774		6.54564		8.55964		5.97815
	7.92641		6.76538		6.61044		6.87299		7.53637		8.71566		6.5666		7.24132		5.49339		7.49559		7.66438
	7.39861		4.83366		5.3529		7.19902		7.93002		7.07477		6.89354		3.34357		6.4431		6.5294		3.73505
	7.21477		6.70365		4.39962		5.65238		7.49756		9.97442		6.73289		3.76283		5.67085		7.74749		6.46722
	4.60817		2.03732		9.09442		6.84134		7.33332		7.42146		6.07088		7.11872		6.67874		8.45994		5.85249
	4.72986		7.20867		4.44218		5.97666		8.55533		9.23958		7.34673		4.63715		7.22341		7.05205		5.72234
	6.27698		4.42113		6.01772		7.30913		7.21173		7.14419		6.63399		5.28051		7.75637		7.99951		5.72041
	5.73386		3.64675		4.78557		7.38002		7.07776		9.76725		7.20955		6.04744		8.19136		8.73606		7.29961
	7.99435		6.37812		6.68392		6.63088		7.13953		7.15485		6.44872		5.01363		6.96902		7.87975		6.85075
	4.22596		5.53382		4.17285		6.83183		6.44591		9.09891		6.25908		5.74901		7.02932		7.59057		7.13765
	6.18167		2.73046		7.52371		6.65548		7.87796		7.55816		5.3529		5.57493		8.67134		8.547		7.62629
	8.24405		5.6989		9.29166		6.75787		7.5414		5.05586		7.07676		4.8147		7.41473		7.23624		5.18279
	6.23625		3.30101		4.91478		8.17055		7.26925		5.85925		7.55755		6.17064		6.57157		4.78557		8.22873
	6.15071		4.16372		8.5196		6.75924		9.02089		7.45785		3.38439		7.43757		7.82398		7.64199		5.46133
	7.64397		7.23241		7.23326		7.13012		8.43757		7.2307		5.67288		7.11824		8.42588		8.48949		8.03492
	4.22596		7.16539		7.88019		7.51281		6.43271		7.05051		6.17801		5.92126		6.02915		8.00877		6.5129
	4.94043		5.81273		8.28104		7.56399		6.80015		8.62381		6.39205		6.14187		6.47543		7.54702		7.01511
	9.38867		6.4543		7.07327		7.658		8.71933		7.07527		7.25434		6.96791		6.60086		7.56338		7.20605
	3.92671		6.66002		12.4766		6.195		7.3213		7.58549		7.26389		3.53281		7.54234		7.80948		4.42819
	6.40482		5.82325		8.98747		7.00124		6.95674		8.36772		7.05256		6.94487		5.50305		8.23454		6.46538
	6.92419		5.76394		5.96461		6.87299		6.45986		8.44888		5.04071		6.85511		7.40437		7.61093		7.8737
	5.83194		7.36295		6.21643		7.21867		6.89892		7.67813		7.03764		7.00231		6.96122		7.87033		7.46936
	6.68614		6.06951		6.20933		6.8093		7.58579		7.7916		5.87428		7.40688		7.76941		8.96939		8.01386
	6.1998		6.30755		8.66871		7.36108		8.31468		8.23705		5.4282		6.12652		6.26134		4.52222		6.12523
	5.66268		6.48448		5.34449		7.01458		7.86241		8.69424		6.11746		6.77486		5.24381		8.29587		4.36272
	7.11537		6.45337		8.42316		5.47625		7.52943		8.47137		6.25342		7.01405		8.61528		8.21494		7.10719
	5.01754		7.09796		7.07177		7.50991		5.46383		8.33031		6.79024		8.15694		8.49227		6.46538		4.75048
	4.19087		3.82908		8.80864		7.1004		6.75993		8.19544		6.35992		6.50234		7.08074		6.86686		5.4204
	6.60086		5.59486		6.23741		7.25225		7.12634		7.11681		6.86255		6.7357		7.69974		4.99383		5.5523
	8.22511		4.33218		10.1754		6.90129		4.56612		7.55724		7.21129		6.87908		5.93071		8.23282		6.9207
	6.15448		5.3303		5.93384		4.76063		6.48538		7.20122		7.15023		6.63166		5.11781		7.00124		6.62464
	4.57223		4.66532		8.03166		6.80735		4.75557		6.59926		7.23411		6.13805		5.957		5.51262		7.20693
	6.74823		5.90047		6.83247		6.91193		7.80082		7.35995		6.85574		6.82224		6.79157		6.95054		4.33218
	3.40419		5.10716		5.38857		6.78425		6.3589		8.03721		6.10437		7.1287		7.38332		8.03568		9.61707
	8.6867		6.55408		8.55249		7.95538		7.61035		8.38228		6.79817		8.46318		6.25001		7.55909		5.33884
	3.25656		7.95724		7.19593		6.87115		8.92487		7.97526		8.44876		6.8145		6.77081		8.07592		7.19726
	6.9601		6.61677		4.42819		6.20577		7.07726		6.55994		5.57044		7.95559		6.73219		6.74754		7.69894
	6.23741		7.10525		8.56043		5.0292		7.859		6.75169		5.73957		4.8929		5.78592		7.94205		6.55827
	5.44107		7.81545		6.82673		6.9007		8.80093		7.99136		4.92341		7.23241		6.45893		8.34219		5.91012
	8.06708		5.45125		7.8793		7.57556		7.87617		7.64848		6.59765		6.55911		6.67503		6.08843		6.7789
	5.91491		3.84182		5.91172		7.18927		7.54171		8.49999		6.90603		6.49434		7.11008		6.92767		5.47378
	7.40652		6.67726		8.28447		8.7629		6.96902		8.29174		7.38039		7.63117		6.71731		7.77835		5.36125
	5.22176		6.54224		9.04575		7.92726		7.12206		7.96915		6.21052		7.68656		7.53069		6.39205		6.62385
	4.08749		4.99383		8.21302		8.64324		5.59046		8.09716		6.72442		6.74546		4.83366		6.06951		6.76742
	4.45597		6.91427		3.8031		7.46666		7.41863		3.87909		6.50322		4.48965		6.9443		3.92671		6.5129
	7.4794		6.59765		5.4204		6.52854		7.18883		8.61593		5.9856		5.25311		6.89295		7.14698		6.49256
	5.20247		6.90485		5.9974		5.37226		7.42779		7.01352		7.19814		7.77091		5.99299		7.82657		6.64249
	7.20166		6.34863		7.88509		7.37485		7.43374		4.44218		6.16693		6.54818		5.81273		8.23313		6.57897
	3.5499		6.77823		6.65396		5.67085		7.15069		5.73957		6.89235		6.15322		7.45989		4.66532		6.592
	2.73046		5.23442		8.89094		6.56411		7.27171		8.18841		5.68497		6.38312		8.89782		8.32374		5.84739
	8.43065		6.5164		4.51579		6.90307		7.65325		8.06819		7.82374		6.11746		5.29541		8.61571		7.64142
	6.98444		5.99299		8.60291		7.10186		7.52752		4.87053		7.59355		7.7551		5.50545		8.38605		7.41153
	4.63142		4.66532		8.96019		5.818		6.6532		8.46766		5.78773		5.44107		8.33683		6.75993		6.27031
	7.34863		6.13422		7.78377		6.36298		7.41224		8.15998		5.25926		5.56594		7.96383		7.63972		6.86131
	4.57223		7.43339		10.1898		6.98498		7.02827		6.59765		6.48628		7.13953		5.1661		7.08964		8.0704
	4.26816		6.46354		6.4617		5.92284		8.19462		7.69867		6.95842		4.50932		7.23794		7.61994		6.25908
	4.2173		5.81273		6.67205		6.85511		7.24301		8.3412		6.42222		6.61361		7.26595		6.89653		6.55743
	5.6144		5.99446		9.38044		6.40482		8.18874		8.59004		5.30131		5.70678		7.15254		7.41863		5.25311
	7.00553		6.65472		8.41417		6.9601		2.80457		6.12135		7.11776		4.67637		7.90661		7.76115		7.52721
	6.94259		6.25682		5.96005		7.36706		6.16321		7.38552		6.36094		6.57404		7.28434		8.37564		7.05612
	3.56671		6.1355		3.66202		7.341		7.87213		7.49788		6.29565		7.22427		7.14652		8.05254		6.7051
	8.7314		5.44363		7.62888		5.6989		8.68061		8.65523		7.44828		7.70905		5.0292		8.29705		8.33655
	5.58826		5.4713		6.74685		5.9354		4.39235		8.033		6.82095		7.83781		8.27519		3.89121		7.27988
	3.77643		7.25642		8.20031		6.78425		7.12206		8.22952		6.93516		7.95621		7.60095		8.04215		5.4204
	6.97951		6.27031		6.65927		6.8576		6.14567		7.94205		7.38186		5.96612		7.36108		7.77637		5.818
	8.6864		8.72519		5.66881		7.69358		8.21908		6.23625		6.82992		5.92914		8.81514		7.1713		4.74537
	3.73505		6.99369		7.42181		7.71644		3.961		6.36196		6.75513		8.34162		7.32169		8.31019		7.90705
	6.48898		3.97218		7.12728		7.97648		7.86173		5.09999		6.84008		7.53228		6.71945		4.25986		7.47606
	5.92757		7.01934		7.84407		6.66605		7.2676		7.71011		5.99151		5.80209		8.35795		8.41627		6.84008
	5.26842		6.14187		9.98094		6.24201		6.94316		7.71512		5.80919		6.1998		5.40196		7.50667		5.80742
	5.14912		6.05578		1.87026		5.56141		6.9668		7.51988		4.07754		6.35172		7.07925		7.55446		6.64326
	4.75557		6.44497		6.26695		6.78759		7.20736		8.76096		6.05301		6.3476		5.01363		8.20257		4.54127
	5.336		6.55155		7.59206		3.5499		8.19755		7.72325		6.01915		4.68185		7.28434		8.38079		5.40196
	6.32037		5.90047		8.1815		7.19902		7.53826		8.29321		7.05816		5.55001		6.89115		8.47285		5.80742
	4.08749		6.03481		4.42113		7.10331		7.28596		7.99056		6.65168		4.46958		5.72234		9.05537		6.52768
	8.7028		6.71945		5.73386		6.93859		7.46125		6.8093		7.06675		6.63399		5.74524		6.91134		7.42674
	6.51203		6.56161		9.08937		6.91486		7.33486		4.3244		6.77351		5.29837		6.92651		8.2675		6.24887
	6.62385		5.83712		8.18233		5.39126		7.373		6.25229		7.09258		6.14567		7.62428		8.07353		8.16871
	4.60817		6.47088		6.45337		6.38012		6.80212		8.23439		7.50213		5.82151		6.44591		4.70348		6.54479
	8.96909		6.76606		7.02618		4.49625		8.34331		3.70647		6.94827		6.82095		7.55291		7.44759		5.6749
	6.54224		6.91603		7.27743		7.68059		7.40365		8.28907		6.57979		8.16586		6.32249		7.7967		6.41742
	6.91954		5.91012		8.70808		5.45378		7.29801		7.16402		6.6698		2.80457		6.62698		8.05535		5.33315
	6.12909		7.29361		7.76642		6.32355		8.69018		5.80742		7.11681		7.7393		4.25149		7.99931		7.36108
	6.00616		5.14569		4.90171		6.78425		7.09552		8.07464		6.48538		6.50852		5.44363		8.16486		6.35788
	5.89561		6.26583		8.79737		7.57767		7.98334		8.34807		6.12652		5.61655		6.39993		3.18594		6.64479
	6.97345		6.83438		7.49198		7.70905		6.18289		8.34289		5.6749		6.11876		7.98535		7.60331		7.94811
	3.6155		5.515		7.0098		7.52403		7.68521		6.60885		4.1545		6.18654		3.69187		7.7719		5.8003
	6.86131		7.0459		8.46654		6.40871		8.11971		7.848		7.33178		6.06815		5.66881		7.86309		6.04744
	7.14233		6.35583		6.29129		6.25115		6.90426		7.4126		5.02144		3.8031		6.75238		7.25225		5.07817
	5.49339		7.13999		5.06335		7.78401		7.90531		8.19998		6.68834		8.25192		6.63941		6.37209		5.12836
	2.87356		6.38809		5.94626		8.07427		7.54046		6.50145		6.57074		6.96401		4.58435		8.03415		7.84245
	6.29783		6.55408		7.90987		5.69097		3.92671		4.61403		6.36805		7.29681		6.72016		7.4774		5.37226
	5.60359		5.72041		8.11213		6.36094		7.98996		7.84407		7.44311		4.31655		7.941		7.60683		4.66532
	6.15071		5.44107		8.05759		6.07496		7.89195		4.3399		6.39403		7.43999		6.75993		7.87908		7.61879
	4.55996		5.90209		6.85449		7.35468		7.07527		4.69811		6.72229		3.08329		6.3741		4.01566		6.9668
	4.54127		6.76266		9.01352		7.6283		7.59325		4.30068		6.2803		7.01086		6.90189		7.23539		7.19593
	4.69272		4.8147		5.2775		4.99782		7.45615		7.40005		7.05612		4.67086		6.96178		7.70054		6.93401
	6.67503		6.86008		7.51924		7.56888		7.33332		6.44216		7.31268		5.78047		7.06926		7.20034		7.20911
	5.19921		5.50785		8.63855		7.3111		7.3939		7.80756		4.90171		5.8891		6.71086		8.14142		7.93341
	7.72638		4.49625		7.17492		5.87096		6.21052		8.97119		6.4543		5.81976		7.71222		5.48608		5.75276
	5.28351		4.25986		4.79538		8.06095		8.0499		8.37469		6.33721		6.47997		6.39796		6.16693		5.87594
	7.66161		5.81096		7.29721		7.18078		6.97896		7.57404		7.41046		5.73957		7.71801		8.37387		5.26233
	6.657		6.8008		6.12523		8.2259		8.14262		8.63771		4.1071		6.35685		6.77081		7.43094		5.31881
	6.71015		6.27031		4.81947		6.87665		3.05589		6.98061		6.41452		6.00033		6.4251		8.07114		6.10963
	8.63719		6.35172		8.1366		5.77864		7.04693		7.99156		7.07826		7.78891		6.41162		7.70241		5.53382
	6.01051		7.61385		6.24201		5.26538		8.48243		8.74578		6.37611		8.03663		4.80991		2.03732		7.39463
	7.0847		4.65415		9.63525		6.98717		6.54394		8.27414		6.89594		6.77284		6.48538		7.62945		5.69296
	5.29245		4.38502		8.66118		7.76567		7.78989		7.63517		7.54639		5.85418		7.62255		7.66908		5.22176
	5.7841		6.36805		4.76567		6.87968		8.21956		7.15023		6.32988		7.26595		7.53164		6.82801		6.9828
	6.64172		4.70881		6.47179		6.68023		7.29601		8.24699		7.54483		5.1861		5.9165		5.75276		7.91052
	6.29783		6.90189		2.80457		7.35128		7.91828		8.33513		6.48448		7.56979		6.77554		8.33116		6.58225
	5.0521		6.60805		6.41065		6.25229		7.00606		8.06132		7.08173		6.57322		7.03816		6.82417		5.4099
	4.06749		3.13593		6.59443		6.37209		7.87055		7.41437		7.41828		4.53496		5.09277		9.48887		5.63357
	4.91045		5.12836		8.34064		7.6566		5.07079		7.98354		6.13166		5.49339		6.06267		4.07754		4.65415
	6.08441		6.60726		4.56612		7.85214		7.92917		7.46328		7.48472		6.7378		6.73989		7.74366		7.02565
	6.4543		5.84739		8.82429		6.40579		8.00307		7.34062		6.55071		7.96075		6.85075		8.92471		7.24048
	5.32744		6.86563		7.42709		7.95972		7.81163		9.159		5.98411		8.17105		6.47088		4.73506		7.34673
	7.60066		4.47631		5.31881		7.01139		7.04075		6.82288		6.43177		5.76208		8.68101		5.09999		6.75444
	4.73506		5.75463		9.5213		6.23046		8.05647		8.31555		6.55408		5.46882		6.61123		5.94162		6.89295
	5.22494		6.51115		3.98323		7.22384		6.49879		7.85443		7.47606		6.09377		6.08709		7.65604		7.07427
	6.05578		5.64407		5.60359		8.17621		8.03415		7.97221		7.2904		6.52595		6.64095		7.81948		6.96957
	4.67637		6.71588		7.37115		5.93851		7.20166		7.16402		6.24773		7.96054		7.92875		8.21638		7.17718
	5.21216		7.27499		6.21525		5.18939		7.79816		4.05733		6.74615		7.77661		6.34242		7.94477		4.84765
	7.69115		6.51203		9.23297		6.54309		8.13798		7.57918		5.39929		6.0951		6.67055		8.33951		5.38857
	7.06926		7.41898		5.7262		7.23454		6.75306		8.69206		7.19283		4.29265		5.28948		7.26141		3.92671
	7.70985		6.21407		8.11178		6.73148		8.07464		5.52446		5.57493		6.47088		6.93055		8.25913		6.9817
	3.86682		6.6683		6.72158		5.44618		8.31309		7.57162		6.89773		7.34749		6.65624		6.45244		5.92914
	4.61986		5.80919		5.67085		6.58876		7.61559		8.71256		7.45921		5.0521		6.65548		4.17285		5.86596
	8.0074		5.09277		9.09621		7.18392		7.64932		8.89822		6.98334		6.5337		6.69566		8.80758		7.56736
	4.24305		6.14567		6.82353		7.81211		8.42329		8.02936		8.03721		6.67726		9.23694		8.08922		5.6749
	6.57074		4.84301		7.74927		5.69296		6.51727		7.16949		6.16197		8.14742		7.02565		6.0047		7.99673
	6.93516		6.12135		5.42561		7.04744		7.941		7.76542		6.6698		4.94043		7.31032		7.94142		5.85587
	6.39796		6.18654		7.56461		6.86501		7.38406		7.82421		6.98826		6.85822		6.90129		7.80371		5.53382
	8.97006		9.60036		7.41117		7.85991		7.11489		7.55106		6.4365		5.89236		4.95716		7.36445		4.76567
	3.21004		5.5221		7.60566		8.51583		6.63631		8.08487		5.91331		7.3637		5.0292		8.1061		5.19921
	6.68614		6.808		7.87572		6.56494		4.76063		8.23031		6.38212		8.58554		6.41162		7.78475		6.32249
	2.69124		4.9777		9.2767		7.61618		8.29984		6.92651		6.34553		5.2775		5.80387		8.05778		6.71158
	5.87594		7.20386		9.69747		7.19416		6.90129		7.07627		7.06018		6.11616		6.35992		8.06948		5.92599
	5.27449		7.0916		7.49066		7.16402		7.19593		7.47104		6.56411		3.9497		6.16817		4.96543		6.8093
	5.78953		6.35172		5.45378		8.39423		10.3909		7.66078		7.41863		6.2117		6.2117		7.97323		6.23394
	5.13879		5.8003		7.09356		6.45708		6.69274		8.40643		6.89175		5.66268		6.82353		8.34709		5.2865
	6.74546		6.66304		8.70662		7.88841		7.73157		7.65465		7.35468		8.25192		8.13158		6.76266		6.82609
	5.67288		5.82674		6.94657		7.40437		8.09031		8.29307		7.44862		5.91012		7.60595		6.62464		7.52371
	5.59266		6.0134		7.5005		8.34429		8.05516		8.37032		6.84888		6.98717		6.70871		7.72949		3.30101
	4.25986		8.41247		5.12486		6.8216		7.57556		8.59037		6.68392		7.27048		6.78825		8.45856		7.57586
	6.72866		7.56552		7.6496		6.83691		6.99908		8.73216		7.59859		6.01195		7.88175		7.93278		7.64791
	7.94561		6.34034		6.99043		5.38587		5.89236		6.8495		6.40579		3.90318		7.40437		6.86378		6.04605
	7.00231		6.10041		4.6873		6.1444		7.01617		8.572		5.62723		6.47361		7.67403		5.02533		5.1861
	6.86686		6.58306		9.04136		7.05968		7.75206		8.11514		6.96957		6.86378		7.06322		7.44759		7.72037
	7.19194		3.92671		8.43617		6.26695		8.16048		5.88419		7.48239		5.8003		7.27253		8.17005		5.4282
	6.99477		5.72041		7.1663		6.41065		6.52336		7.30001		7.29601		6.91954		5.64823		7.10574		5.25619
	4.483		6.05301		7.68846		5.25926		7.52625		7.06625		5.73386		6.77957		6.26583		6.55239		7.40724
	7.70879		5.14912		5.98114		2.73046		9.70552		6.74754		7.57918		4.33218		7.42146		6.27476		5.42561
	5.19595		4.42113		6.18289		7.33448		7.96486		8.16284		6.62385		4.94464		8.62104		7.61297		6.93573
	4.88847		7.02355		7.66466		8.14245		7.79013		7.98836		6.68761		5.01363		5.818		7.46294		6.65775
	6.43556		6.83818		5.85925		6.13294		6.54054		3.42361		5.50545		4.75048		7.54577		4.80991		5.55687
	7.32169		4.94883		8.62593		7.37818		9.14361		8.77674		7.45853		6.59845		7.79985		7.7604		6.61835
	5.67692		6.09111		5.60142		7.47171		1.55181		7.46125		8.45267		5.96914		5.86261		4.54127		6.87238
	4.35517		4.70881		4.65975		7.13906		8.27879		6.94827		6.85698		6.8426		6.59765		1.41828		6.6668
	4.49625		4.87504		7.77265		7.28272		7.89985		7.33947		7.68439		7.45239		8.47236		8.43014		5.94626
	7.00231		7.17266		8.40498		7.03661		7.24932		7.64255		7.51828		6.88875		7.37891		7.56062		6.75306
	5.65238		5.63568		8.15219		6.28691		6.62542		7.58789		5.29837		6.2792		8.92644		8.40365		5.23756
	6.21525		6.22464		8.04215		7.38002		7.83478		5.92442		6.201		6.3054		7.31307		7.89832		6.24659
	5.22494		7.14046		6.81902		7.73389		7.12918		8.47273		6.98225		7.32325		8.37523		8.33159		8.06948
	5.65652		4.06749		4.95301		7.3637		3.87909		7.9591		6.68761		5.27449		6.88211		8.45292		7.99116
	6.79289		7.0392		8.81846		6.36196		5.04452		8.65595		7.13059		7.35317		7.47573		7.41721		5.95241
	5.11427		6.3861		3.4797		6.21995		7.91935		7.30279		6.89115		6.85138		7.76166		8.793		5.40461
	4.60227		4.88847		8.28089		5.78229		7.36966		5.62935		7.12918		6.79554		7.15531		6.68761		5.43079
	7.27417		5.5221		7.20736		6.3054		7.36966		4.05733		6.51115		6.43271		8.32618		7.56705		4.47631
	6.45244		7.14466		5.41254		7.61908		6.44778		8.14981		7.29481		7.03349		7.99852		8.50179		5.82674
	8.33556		4.30068		7.42849		3.98323		6.43933		7.41721		7.2191		8.50657		7.31857		7.29601		7.04384
	4.74537		4.82895		3.18594		6.66002		8.17222		8.08341		6.70221		6.42701		7.65576		6.94827		6.60247
	5.43851		7.13201		7.04075		6.89713		8.62275		3.5995		6.35992		6.39796		6.28581		6.3393		7.01299
	6.39993		6.53713		5.24069		8.92714		6.70582		7.9332		5.83021		3.4797		7.8183		8.64925		5.98708
	6.24773		3.49772		5.78953		6.68981		7.78327		8.5701		6.44216		5.74901		6.28691		8.04367		7.58789
	3.70647		5.23442		7.62139		6.6993		7.02513		8.33485		6.71302		4.94464		7.34444		8.50573		7.88952
	7.11776		6.40384		7.40437		7.53857		5.59486		8.62285		7.10088		5.48118		7.49526		5.23127		7.9667
	5.94626		6.8008		5.07817		6.3		7.33139		8.59856		7.0007		6.39894		5.74146		7.01086		6.92535
	8.34849		7.06473		5.11427		5.97666		7.48239		6.76129		6.808		5.17948		6.15448		7.65381		6.81255
	4.72464		6.62385		9.19876		5.40461		7.44138		6.7123		6.25908		6.201		7.53006		6.34553		8.12828
	3.87909		6.32988		7.70746		7.0965		8.33088		8.12006		6.87177		5.80742		7.57858		6.57897		5.69097
	4.84301		5.30718		8.51073		7.66798		7.22427		8.64157		5.88254		7.27703		6.4663		5.77315		6.2176
	6.36805		6.01915		8.61132		8.25974		8.41718		6.82801		4.54754		4.64285		7.30913		6.3861		7.5031
	5.42561		6.66153		8.86119		6.53798		4.39962		7.72923		7.05358		6.53627		7.54795		7.24005		7.24974
	9.12694		6.50322		9.75144		6.735		8.39729		6.45244		6.55743		5.73003		6.94316		6.44872		6.87115
	4.88847		6.58876		7.27253		6.16817		7.0916		6.70221		5.91967		4.30865		6.93859		4.69811		7.70534
	3.21004		6.03763		3.4797		4.8147		8.31526		6.48087		5.34166		4.86144		8.20467		8.32646		7.84938
	5.40726		6.12652		7.55106		6.31184		7.73699		6.26695		4.87954		3.99416		5.79134		8.6203		5.07079
	7.21042		7.15254		5.12486		7.9529		7.58759		5.96157		5.43079		7.04487		7.89569		8.39423		4.88401
	4.59633		5.08184		8.44343		6.83438		8.35961		7.95848		6.52768		7.25933		7.43861		6.87604		6.49166
	4.42819		6.24887		7.74136		7.1192		7.07177		7.91462		5.83021		5.49339		6.93688		7.5392		5.33315
	7.30279		5.69097		9.5929		4.74537		7.15069		6.97068		5.90531		8.04348		5.91331		8.56707		6.59845
	6.07767		6.44497		5.21216		7.57767		5.68297		8.63331		6.69347		7.05205		6.20696		7.32403		6.35378
	9.11527		5.07079		8.15134		7.19194		7.83314		7.22813		7.00338		7.29441		5.56819		8.42614		6.5666
	5.57493		6.73289		7.41615		6.69347		8.0794		7.90073		5.80919		5.89724		6.64786		7.66411		6.94259
	6.44497		4.98176		8.86395		7.0546		7.7375		7.27335		6.14819		5.31301		7.00766		8.05815		6.32037
	4.91478		6.75306		5.60577		7.53354		7.01829		7.18794		6.90426		6.98989		4.79049		8.76364		6.43461
	5.46633		6.38212		9.72824		6.69566		6.99693		8.39503		9.30495		4.2173		6.852		7.88131		6.92477
	5.51024		5.56368		3.82908		7.84407		7.24848		8.28342		7.41579		7.5057		8.71865		7.58908		6.57404
	6.46078		5.86261		6.17556		8.66363		7.01934		7.73647		4.11676		4.13581		8.35393		7.62457		5.66063
	6.29783		4.79049		7.77958		7.60683		9.61274		6.96957		1.55181		6.62385		7.1915		8.42199		7.42989
	6.21289		5.44363		8.1672		6.88271		7.36706		8.10003		5.50305		6.82737		6.89414		8.65379		6.79949
	5.43079		6.87115		5.21537		7.23155		7.48869		7.55909		6.87115		7.03764		6.7385		8.30831		7.00873
	4.89732		6.61203		7.90857		7.19593		7.03088		7.67266		7.22298		6.4543		8.39289		8.28148		5.56594
	3.76283		5.46633		9.88607		6.42126		6.18775		7.37707		7.19061		6.90544		7.60125		8.17255		6.53113
	7.50765		7.10622		6.26359		6.97566		6.75582		5.07817		7.20649		5.57939		7.00766		7.76617		7.2247
	8.39155		6.47361		4.2173		6.21525		7.66494		7.51185		7.7781		6.78492		3.42361		8.41326		6.32143
	8.82282		8.97441		5.84739		7.5414		7.99693		8.01795		7.00231		6.17923		6.07088		7.53889		4.66532
	5.18939		8.18529		6.55239		7.17718		7.55291		6.00033		5.97065		6.77419		6.25456		6.83818		6.82865
	7.98274		5.89724		8.8758		4.00497		7.78891		3.10995		5.76023		6.15573		7.26801		4.57223		5.80209
	6.41549		7.2165		8.06151		7.91073		7.32907		9.43789		6.24086		5.99446		6.41934		8.29763		7.67649
	7.58129		8.58928		4.80991		6.43461		6.2803		6.94997		7.32364		6.47543		7.1067		7.1287		6.12135
	5.7565		7.31778		6.9601		7.22856		2.18042		7.28717		5.1661		6.55576		6.74615		8.00701		7.12206
	4.58435		7.07676		7.30992		5.81096		7.84592		8.44508		7.39281		6.23162		7.00124		7.38479		5.52915
	9.38278		6.13294		4.50932		7.92214		7.8301		8.08031		6.751		3.86682		6.41452		7.80636		3.8031
	5.35847		6.85511		7.84731		7.09796		7.55012		8.5852		5.6187		8.03702		6.80408		7.88642		7.1713
	5.50065		5.42301		5.19268		5.51262		8.50919		8.27909		6.23856		4.8147		6.05716		8.23423		6.78625
	6.94202		6.34553		9.22898		7.8692		6.03481		7.47137		6.88995		8.11178		7.42919		8.05066		7.19372
	5.94471		4.85686		5.46383		7.09307		6.49879		7.3252		6.32883		6.74823		6.79752		7.78818		5.57716
	8.63141		6.32461		6.48178		6.83311		7.08272		7.33525		7.0267		4.25986		6.7378		7.78106		3.89121
	8.04764		6.64249		5.56141		7.49821		8.37632		6.34966		7.36743		6.92882		6.3054		8.2259		6.36602
	6.48538		6.15322		5.90691		6.83311		7.37004		2.9381		7.60947		6.72584		6.89534		6.64556		6.58225
	5.39395		6.57569		7.16128		6.51553		7.6605		7.84661		6.46262		6.83628		8.80431		8.24992		6.82929
	4.61986		6.49166		6.49791		6.64633		7.40938		4.64285		5.48852		5.88583		3.99416		8.76714		4.6873
	7.1096		6.07496		6.46996		6.83247		7.92832		4.54127		6.10437		6.60006		6.80474		7.62974		7.34901
	6.3871		5.51737		6.45986		5.63568		7.7188		6.79488		5.336		7.54826		6.91075		7.82845		6.1444
	5.90209		5.74901		6.78359		6.96513		7.16676		6.63321		7.68195		6.2293		6.26695		7.40401		7.01033
	4.87053		4.57831		8.77865		7.47673		8.12094		7.34635		6.87786		5.37773		7.02198		7.81449		6.36094
	5.79134		4.9777		7.27171		6.18775		6.46078		8.99225		7.76166		6.60247		5.8693		7.66604		6.23394
	8.22574		5.60359		2.83966		6.82481		6.53198		8.14639		7.12015		6.72513		6.82417		7.84892		6.75787
	7.03349		5.72427		7.17583		5.77864		7.04795		6.97455		6.54818		7.55816		6.13294		5.38316		7.46632
	0.165514		4.9858		10.3668		6.6301		8.11848		7.86127		9.24164		4.94043		8.72759		8.77956		6.76402
	5.89399		7.02984		7.51988		6.97951		7.59948		7.03609		5.14225		7.55106		6.91486		7.55785		6.17556
	5.29245		5.4713		8.23141		6.63088		4.42113		6.37209		6.86686		5.3501		6.20696		7.08371		6.2902
	7.64029		4.00497		8.09482		8.21877		7.99016		7.9589		6.42986		6.92477		5.93696		7.45136		7.66328
	2.24496		6.8067		6.04465		9.44319		7.35694		8.45493		6.26471		6.40968		7.21216		7.53385		8.08941
	5.38045		6.21052		8.64552		6.23162		4.61986		8.60723		6.04465		7.37448		6.74961		6.6262		5.37226
	6.76402		6.0263		5.10716		6.1731		7.69331		6.6638		6.70003		6.24545		4.88401		8.07904		6.41452
	6.55239		6.9207		8.04896		6.67279		6.94373		8.28536		5.81976		5.62935		4.20857		8.05909		6.86193
	6.29565		6.39007		9.06967		7.51828		8.3226		8.69956		5.98411		6.52595		3.32251		6.94997		7.30795
	4.57223		6.02915		7.81568		7.04693		7.55322		6.57815		6.8495		8.08941		5.23756		8.47087		7.74978
	5.38857		6.23856		7.04023		7.66272		7.42075		8.48169		8.23031		6.00324		7.86082		6.23046		5.45125
	7.5439		6.82609		6.27587		6.46354		7.76492		7.68276		6.57897		5.87096		5.85418		6.53284		7.70852
	4.84301		7.27417		8.09248		7.07776		6.62464		8.57066		6.94884		5.84398		7.66798		8.02782		5.55914
	5.70874		3.30101		9.68558		7.17176		4.39962		7.92085		6.43839		5.71459		8.88589		8.35905		6.90367
	7.36295		5.23442		5.0855		7.20298		8.87151		8.16065		5.37226		4.58435		7.97546		6.01915		6.21407
	4.50932		5.9478		8.14947		7.54483		6.99097		8.5895		6.64249		5.60359		4.12633		4.42819		3.87909
	4.50932		6.27476		7.9785		6.49256		7.54608		8.64843		6.47179		6.37912		7.71381		6.69858		5.4099
	5.19921		5.93851		8.99071		7.23369		4.4628		7.54359		5.27146		3.89121		7.26966		6.56411		5.22811
	8.36868		6.44965		8.78734		5.0292		8.88418		7.13531		4.82423		3.92671		7.00873		5.8776		6.75513
	5.27449		6.54394		7.9558		7.40652		7.18883		8.93967		7.26099		6.40871		7.2409		6.78359		5.32457
	6.85822		4.61986		8.30874		7.92342		7.94936		8.42186		4.06749		6.56494		5.12836		5.46383		5.71069
	5.17948		6.35378		6.17187		6.23625		7.99793		8.02782		7.60478		3.92671		4.66532		8.58432		7.6451
	7.99415		5.95547		8.14108		8.05741		7.35619		8.50824		6.92709		7.48802		5.50785		7.71433		5.68497
	6.28471		5.37773		4.71939		7.74392		6.66755		8.86985		7.01405		7.86807		9.06763		4.57831		7.33217
	6.1444		5.71264		7.66798		5.17281		7.25684		8.15795		6.11224		6.6638		6.7385		6.42126		8.01191
	7.04436		7.5018		0.57098		5.93851		8.49312		8.23501		6.19379		6.58714		5.93851		7.28515		5.28948
	4.57831		6.7123		9.23912		8.10021		6.96234		7.83197		7.28272		6.61598		8.00169		8.17321		5.90691
	6.00033		6.37007		7.4643		6.13166		6.23625		9.42845		4.08749		5.81096		6.89055		7.89261		7.19372
	6.53198		7.22985		7.65044		7.04126		6.61835		8.57824		6.45058		8.88369		5.76394		3.56671		6.52162
	3.82908		5.69494		6.1998		6.81838		7.38369		7.65549		6.92767		7.48736		6.02202		7.6185		7.23794
	4.37021		6.00033		3.90318		6.75444		7.07277		7.61763		6.65548		8.14142		6.95449		8.89264		4.54127
	3.5995		6.43461		4.94883		7.49165		7.69948		7.16448		6.60965		7.13624		7.76966		8.12601		6.25569
	4.01566		5.99299		6.0736		4.99383		8.20548		7.91376		9.60159		5.67692		6.23162		6.92998		5.06708
	8.35379		7.33409		7.34976		6.74961		8.5862		7.96219		6.31718		7.43548		7.6039		8.04063		5.4099
	7.44207		7.45308		6.12135		4.07754		8.30554		7.89745		5.63357		6.05023		4.72986		6.62854		5.07449
	7.04333		6.5337		7.01352		6.85822		6.95674		6.61361		5.90209		6.00616		6.87115		8.49034		6.82224
	4.49625		5.36401		4.13581		7.24722		6.53027		6.48358		7.47137		6.26246		5.56368		6.79686		5.8693
	7.4126		5.96612		8.49602		7.60095		7.58878		7.53322		9.13639		3.9497		6.42605		7.08371		5.58605
	6.87725		7.80516		8.17968		5.26233		5.62297		7.55755		7.7188		6.77014		6.59281		6.0736		6.71874
	7.92449		6.64862		5.39929		7.16494		7.56675		7.60213		5.3101		6.04185		7.98836		4.99383		6.52595
	4.59633		5.72234		6.9007		5.30131		7.28434		8.51701		6.63399		5.55459		7.00926		6.90367		9.22078
	4.05733		7.00016		6.43933		6.35378		7.92726		4.4628		6.02772		4.75048		6.66304		5.57939		7.06322
	5.8891		6.3548		4.87053		6.28691		7.74596		8.07372		6.86378		6.8495		7.53795		6.83691		6.88029
	5.336		5.96005		7.63088		7.44759		7.63659		6.55324		6.82545		4.3399		8.14348		8.20499		5.58826
	7.52466		4.36272		7.49657		3.38439		7.46599		7.82492		6.97455		6.59926		6.54394		7.28028		6.70799
	4.87053		6.52336		5.05962		6.93917		7.98595		7.35468		6.85946		5.77864		4.96543		9.50372		7.2247
	6.39993		7.38772		8.05366		5.59486		8.12322		6.67726		6.52162		4.87954		5.81976		7.57888		6.98771
	5.08914		6.67726		7.33679		7.16174		9.42797		8.0783		4.88847		4.16372		7.23963		7.21564		6.18167
	7.14698		6.12523		3.73505		6.93917		8.02261		6.44872		5.91967		7.70693		8.76115		5.42561		6.52509
	6.2117		6.34346		7.74417		5.90691		6.99801		7.49231		8.33116		6.01915		4.91045		7.77513		6.21995
	7.31425		5.51974		8.31353		7.6925		7.55539		7.54046		7.40437		4.1819		5.83021		8.0307		7.60449
	4.77068		4.1819		8.94392		7.66604		6.21525		8.34584		5.73957		6.80865		5.29245		8.291		7.21996
	8.52195		5.86261		5.68096		6.65396		3.8031		7.33062		6.5164		1.26413		7.24428		7.19814		5.8809
	6.58957		6.18654		10.2214		6.01195		7.2713		8.92157		6.68761		5.25311		6.00179		6.50057		7.08914
	5.60577		6.90603		9.82099		6.94884		7.69787		7.99634		7.70826		6.07088		7.40938		9.19103		6.47179
	4.59036		5.63568		9.45914		7.55291		8.57579		9.39492		6.6942		5.4563		8.52886		8.54068		7.03712
	5.07817		6.28581		5.58605		6.86563		7.72586		8.34485		6.92477		5.49096		5.44363		4.38502		5.6144
	7.28757		5.09277		5.84739		7.89173		6.92419		9.489		5.0855		6.37511		6.26359		6.43933		6.87968
	6.35069		5.98263		7.38442		7.63231		7.01139		7.14419		6.18411		6.57897		5.75089		6.3097		6.15197
	4.63715		5.69693		3.05589		6.81838		7.77116		8.07132		6.61282		5.77132		6.85449		5.23756		6.81515
	4.20857		5.96461		6.1731		6.60885		7.86173		8.29543		5.90852		7.60742		7.29361		9.10221		6.20458
	8.1956		5.45125		4.66532		8.79219		7.69088		7.3008		6.86747		5.94162		6.03198		7.68331		6.55576
	4.05733		6.50764		5.5431		6.92187		3.84182		8.03625		5.00576		8.41273		6.35172		7.66963		7.85945
	5.82151		6.47088		9.26883		7.956		8.33584		8.41208		6.88634		4.08749		7.37152		7.37522		6.7378
	4.57223		6.14187		9.19427		8.01347		5.62935		8.02319		5.07817		4.80024		6.77756		8.46194		6.58714
	6.95617		7.17988		8.26385		5.09638		7.05968		5.13533		6.93974		5.62935		7.03141		8.06485		5.91331
	5.50305		6.0334		8.07995		5.70678		6.55743		7.11585		7.77538		4.74023		7.21173		8.03644		7.35128
	5.91491		3.21004		6.44872		8.13401		7.41544		4.39235		6.6532		4.02624		6.15197		7.84892		7.61297
	4.69272		5.90691		8.22542		7.13531		6.98389		8.72135		6.98717		6.17433		8.03089		6.97234		6.29456
	7.42498		6.88573		6.68687		7.34901		7.32403		7.65016		7.5495		4.71939		8.42458		5.1861		5.64407
	5.69296		5.90691		3.67706		6.89832		6.95674		6.48178		6.7789		4.53496		6.18045		7.78989		4.91045
	6.99369		6.38809		9.08677		7.41863		7.34863		8.10876		6.2443		3.99416		7.1663		7.33871		6.15322
	6.14567		6.10305		8.77392		7.31622		7.68031		8.6292		7.37818		7.75434		6.63863		7.90095		6.48628
	8.1848		5.77682		5.19595		6.85574		7.663		8.49541		7.16128		6.60247		7.2447		9.47035		6.25908
	4.59036		2.73046		7.1192		7.53417		7.64651		7.37374		6.51378		6.39698		5.3529		8.35073		7.25183
	5.3473		5.08914		5.65031		4.98176		6.56909		8.39048		6.68466		6.01915		6.21643		4.52222		7.24343
	4.12633		6.11746		9.21692		7.64622		8.31569		8.51677		6.07496		5.89236		5.96157		8.66261		5.67692
	6.47543		6.7962		6.71588		7.02303		7.82681		7.6496		7.05409		5.51737		5.70088		7.70879		6.13805
	8.36731		5.78773		4.76063		7.87527		6.48087		6.00324		7.33486		4.79049		7.14698		7.6153		5.53382
	5.65031		5.3473		6.94145		7.80972		6.98225		8.09806		5.98263		7.56093		5.40461		7.96793		5.86261
	6.31931		5.36952		7.65465		7.10331		7.53354		8.20532		6.76334		7.26843		7.0167		6.98771		5.3529
	5.44363		3.87909		4.67086		7.10912		8.28937		9.1165		6.65775		8.38834		6.54987		6.94487		6.98608
	6.0736		6.57404		8.63792		7.38845		7.39136		7.02408		7.81759		6.10831		7.26925		7.07477		7.50829
	6.42605		5.30425		6.28801		7.37189		7.65967		7.3899		7.31071		4.93195		7.22985		7.65016		8.15355
	7.83127		6.13678		4.77567		6.10173		6.592		7.92619		7.10574		3.40419		7.18078		9.06224		7.00338
	7.00285		5.87594		4.00497		6.81385		7.27947		8.37155		6.36906		9.34607		7.53006		6.82992		5.57044
	5.68297		5.48852		5.19595		7.64481		7.03609		7.69546		6.7364		6.23394		7.67567		7.27621		6.48718
	6.91075		5.81449		3.27903		6.93228		7.69733		7.8078		6.47634		5.72041		6.46078		7.44587		3.23357
	7.54857		6.40676		7.27906		7.18972		7.11776		6.40482		6.8132		5.49096		6.76878		7.537		7.43129
	4.85226		6.79883		9.04408		7.8013		7.66853		7.07627		4.90171		7.19946		7.58519		6.06267		7.89305
	4.87053		5.73386		8.47704		7.50797		7.10234		4.43521		6.87115		6.97841		9.29751		8.19511		6.16321
	7.28959		2.56341		6.89175		6.58225		7.65269		8.72375		5.42301		7.52179		4.62566		8.19722		8.23235
	4.39962		5.9856		6.01484		7.26182		7.85922		8.08705		7.15945		5.24069		7.86332		6.62698		7.10137
	2.69124		6.62228		5.15934		6.57239		7.25058		9.18802		5.71264		5.98856		7.14419		7.51378		5.55687
	5.68096		6.19138		7.72481		7.61734		7.2139		7.82845		7.78597		5.09999		4.1071		8.64251		6.47361
	6.57157		7.3016		5.74524		7.16813		4.52222		6.46078		6.92593		7.86762		5.58826		5.15595		6.49256
	4.25986		6.46446		10.3211		6.38411		7.31268		7.8406		7.2152		5.95088		7.42814		7.72403		7.17311
	8.56685		6.33617		10.2628		7.56246		7.87818		7.88464		7.27662		6.91427		6.1731		8.49951		5.48608
	8.78779		3.23357		8.20805		5.53382		7.25892		8.54986		7.10331		5.80919		6.20458		7.48604		4.02624
	4.95301		7.04229		8.34247		7.48405		7.91073		8.57912		8.10734		5.17281		7.69653		7.99435		7.64425
	7.85831		6.24773		6.56078		7.76542		7.302		5.5523		7.28677		4.30068		5.74901		6.98061		4.95716
	2.51689		6.11746		9.74306		6.51901		7.46666		8.334		5.14569		6.95336		8.14194		8.00327		6.21407
	4.26816		4.67637		6.73148		6.07224		5.49096		7.29881		7.03401		6.56577		7.43164		7.75105		7.19416
	5.09999		3.21004		7.3968		6.94827		8.27339		7.43304		6.61835		4.52222		6.49524		7.08717		6.10963
	4.19087		7.0459		5.31591		6.91603		7.22942		7.91182		7.0847		6.41065		9.07028		6.53798		5.76023
	8.43142		8.06485		7.44724		6.55911		6.32672		3.77643		6.55324		4.8147		6.65168		7.63346		6.43839
	5.82325		8.83689		8.37577		7.48736		6.84511		6.7364		7.30001		4.1819		6.89773		8.17985		6.38312
	4.9191		5.9856		7.1493		7.42181		7.1428		7.15393		7.80948		6.01915		7.82939		6.3861		7.40041
	5.64615		6.8644		4.60227		6.66605		7.22298		8.34457		6.97731		4.41401		5.64823		8.102		6.61519
	4.04708		5.49096		4.67637		7.55415		6.8132		8.19625		7.23411		7.153		6.46078		7.0007		7.18436
	3.4797		6.26359		5.64407		7.61327		7.13999		8.42575		5.3303		3.72086		8.61078		7.28677		5.28948
	6.73989		4.71939		8.98036		5.21216		8.01562		7.61676		6.18167		8.71324		7.05917		7.98575		5.61655
	6.2803		6.41452		7.58279		4.57223		8.08941		8.82663		6.79356		5.14569		6.61361		6.6262		6.83183
	5.9354		7.71906		9.51483		8.26416		6.62228		7.64255		6.57651		4.11676		8.9196		7.06524		4.46958
	7.28959		6.77688		4.63142		6.8809		7.6482		8.16351		6.86625		6.80212		8.92503		7.35544		5.79314
	5.1861		5.97964		1.66959		2.4681		6.44497		7.02565		6.50145		6.54394		4.62566		7.64368		5.12836
	5.12836		4.54754		3.77643		7.42954		7.51249		6.2891		6.40482		8.33951		5.77864		7.38296		6.28691
	6.48628		5.58383		6.17433		7.17311		6.45244		8.43386		7.65241		6.35378		6.48358		7.59087		5.81625
	6.34346		6.43366		7.11489		6.58551		7.02565		6.63399		5.52915		6.60805		4.75557		6.96066		5.6144
	6.36094		5.13533		8.95639		6.08977		6.99908		7.83361		6.6668		6.2293		6.00033		5.70285		7.01987
	7.37818		6.06267		6.01772		6.34242		5.37226		7.59147		7.15254		7.37522		2.60786		7.11776		5.7262
	7.04023		5.43079		9.63394		6.29129		6.67726		6.31931		5.33315		3.92671		7.06775		5.96005		6.82673
	2.7682		6.65775		9.24916		7.96711		7.5701		7.38222		6.47361		7.99435		4.61986		8.28238		4.08749
	6.70943		5.38857		9.35069		7.26348		7.17808		4.33218		7.0007		8.23392		5.15934		7.72011		5.23756
	0.165514		6.55827		2.30558		6.77621		8.57901		7.11201		8.33216		5.50545		6.81515		8.30554		7.39499
	4.94043		7.14186		8.23548		7.86468		8.033		7.53763		7.7729		6.04325		6.723		8.7859		4.44218
	2.18042		5.36952		5.57493		5.53149		6.68319		6.8132		6.70799		8.24544		7.03661		7.42393		6.06815
	5.48118		6.09908		7.35242		7.8981		6.03057		8.13487		7.43234		6.34346		5.72234		7.44931		6.44778
	6.10569		6.10963		8.15812		7.42814		7.78032		8.31077		7.55106		5.56368		6.28801		8.21829		7.49723
	6.08172		6.09908		7.64651		7.41969		7.56277		8.6111		6.81644		8.09013		5.1661		8.6399		5.44872
	6.96568		6.29238		7.52275		7.08914		8.11725		2.80457		6.2803		2.7682		7.16311		7.0916		6.48718
	6.27476		5.42301		5.0018		4.46958		6.12909		8.25408		6.42986		5.43079		7.77414		7.0098		5.31591
	6.87786		6.97234		7.9103		7.12539		7.46969		6.99206		6.32778		6.86993		5.71847		8.23501		4.55377
	4.63142		6.51988		8.19136		5.957		5.09638		6.38112		7.03609		5.04071		5.93071		7.7167		6.99477
	4.54127		5.35847		7.32169		5.00576		7.45102		7.49198		7.86218		5.43337		7.12301		8.4643		5.40726
	6.55155		6.80146		7.98394		7.82091		8.02705		7.63773		5.92599		5.91491		5.56368		8.66576		6.62385
	7.35995		4.48965		6.95167		7.2307		6.12781		8.00327		6.82609		6.52595		6.735		8.69503		5.59266
	6.29783		5.85587		8.4428		6.92998		7.90596		8.73264		6.26919		6.09111		5.93384		6.88935		6.49434
	4.70881		4.33218		8.18513		6.46078		7.51249		7.9529		7.00392		7.795		7.11824		8.72029		5.09999
	7.76866		7.34787		6.77554		6.45893		7.78254		6.80604		7.24005		5.61009		8.41796		8.09572		5.7841
	5.16946		6.71158		7.05511		7.79864		7.3213		7.62514		5.71264		5.83021		6.79024		6.76334		6.84511
	6.3589		6.36298		9.43266		6.42414		7.0066		7.92641		5.55459		6.01915		6.96401		8.08341		5.99299
	5.67692		5.45125		7.90422		2.60786		7.95124		7.72377		6.09377		5.89073		7.68466		7.68439		6.2117
	8.79916		6.63709		7.86694		7.77884		7.10137		7.72429		6.78425		6.79157		8.51724		7.68602		6.40871
	6.84008		7.02932		6.54479		6.27698		6.90722		8.95044		4.08749		7.44999		6.80865		7.13718		6.93171
	4.9362		7.48372		8.76152		6.71517		7.53291		7.50245		6.56494		4.86599		8.07206		6.90781		4.38502
	5.42301		7.39499		4.3244		8.13349		6.735		8.06522		5.36677		4.41401		8.68191		7.28959		6.3741
	7.08223		6.3731		7.46193		5.47872		8.3086		7.80924		6.30648		4.64852		6.68981		7.58189		5.22494
	4.4491		6.53713		4.28455		5.59924		6.48987		8.33782		6.79289		8.09931		7.27212		7.12301		6.85822
	6.20458		7.09013		9.34956		7.21042		6.99152		8.72538		6.76198		6.55827		7.90138		7.20342		5.15934
	4.74023		6.09643		4.27639		7.02827		7.45547		7.61966		7.01617		6.42891		6.40968		7.34062		6.19379
	3.30101		5.68897		7.69142		6.64402		6.88453		6.53627		6.18411		5.97366		6.70654		9.54239		5.77132
	4.02624		6.88392		5.57044		8.89653		6.75444		8.79416		6.43271		5.16273		7.18481		7.20078		7.4165
	6.73148		4.57831		5.0097		6.64862		7.24764		6.78359		5.39126		7.77389		8.10574		8.71595		6.33826
	6.86809		6.39993		7.26182		9.04318		7.77637		9.11365		7.14326		4.46958		7.54483		6.62307		6.39304
	8.32532		6.12909		8.47544		7.75561		8.0164		8.80802		6.59443		5.71847		5.74524		7.17492		5.36401
	3.5499		7.01086		8.36112		7.70587		7.3543		8.86869		6.30216		5.06335		5.95394		8.2576		6.82865
	5.20894		6.00324		7.57556		7.28677		7.81425		2.03732		7.19593		7.28878		6.31291		5.52446		9.21486
	8.26416		2.24496		4.99383		6.67503		8.27729		6.27254		7.13765		7.95124		7.46835		7.97546		6.62385
	5.6187		6.42222		7.67375		6.40676		7.19061		4.84301		6.88392		6.76198		8.26674		6.75306		6.26021
	4.41401		6.78625		7.70799		7.56644		8.0164		6.60486		7.46902		5.44872		5.8003		6.9511		7.46902
	3.69187		6.0334		6.20458		7.44656		7.76717		5.70874		8.22004		6.03622		8.59202		8.70818		7.41117
	7.05612		7.64848		8.41653		6.08441		8.71537		8.61849		6.58143		7.45444		4.30865		6.94145		6.01772
	6.18775		7.01511		4.03672		4.81947		7.16311		8.27744		7.50115		6.68023		7.24175		6.63166		5.9478
	5.84739		6.50852		5.30718		6.26583		6.38212		7.55044		6.64479		6.33513		5.18279		7.57071		6.70438
	8.22004		6.58957		7.35052		6.42605		6.88211		7.6814		6.657		6.1355		6.80604		8.075		4.67637
	7.36145		6.3861		7.58279		6.17923		8.23141		8.27339		4.25986		8.59856		5.48363		8.12111		6.41065
	5.27449		6.67279		8.72692		6.60726		6.92593		7.21216		5.51974		9.50403		6.30648		7.87348		5.81976
	4.39962		6.09908		8.37917		6.17678		6.7357		8.06763		6.98771		6.68614		7.19637		8.04063		5.49581
	7.3283		5.39395		5.98114		6.38908		7.32091		8.58532		7.13059		5.52681		5.0097		7.64085		8.17621
	6.92998		5.73003		8.40827		6.69785		7.6039		6.85698		6.26807		6.46722		5.65445		7.44311		4.85686
	9.16865		6.3476		8.65821		4.47631		7.05663		7.11537		6.36805		4.84301		8.5809		7.57071		5.82325
	5.82325		5.55001		9.91422		7.02565		6.96902		8.11655		7.88131		6.36602		6.58143		7.21477		4.4491
	4.26816		6.53627		3.64675		6.82031		7.66825		7.26925		6.75924		5.99151		7.33217		7.83594		7.68602
	5.77864		7.27703		5.92284		5.825		6.45986		8.1397		6.8736		6.95449		7.18927		4.33218		5.0855
	8.46181		5.23442		5.9478		7.37522		7.64679		8.4147		6.94088		7.12491		6.10569		8.22479		6.51027
	7.06423		5.64823		7.2139		6.73078		7.59206		8.25331		6.49702		7.13906		7.09942		7.67759		6.71158
	3.74903		5.3529		7.85808		6.04465		7.71433		7.66715		6.0951		7.21129		6.56909		8.57801		6.31077
	5.45882		6.80015		5.98263		7.7109		7.40473		8.69976		7.59533		4.83366		7.08421		6.52422		6.75031
	3.92671		5.82847		9.13168		8.07151		6.91075		8.13815		6.95336		5.07449		6.89892		5.68897		5.48852
	4.19087		5.07817		8.22716		7.33947		8.05235		7.6434		5.23756		3.64675		7.62514		8.01034		5.61009
	8.55214		5.81976		8.49481		7.07627		4.76063		7.3024		6.38212		6.53798		4.87053		7.46261		7.96731
	5.57044		4.4628		8.57189		7.30041		8.0499		8.01523		6.99801		6.47634		7.04744		7.9157		4.61986
	7.33794		6.05854		8.02724		6.60646		7.25892		8.1295		5.53382		7.55291		7.05663		8.41391		6.20696
	5.60793		6.08977		7.50894		7.47506		7.10186		7.59948		5.70874		5.68297		8.09013		6.40482		5.25619
	5.61009		5.01363		7.2078		6.64556		7.76742		7.21996		6.44404		6.3		4.17285		7.39933		6.45151
	6.52509		7.09209		4.80024		4.85686		7.61414		7.95538		8.1925		5.35847		6.36906		4.67637		7.15439
	6.66605		6.58795		6.44778		7.35732		5.68897		8.34598		6.70148		7.04384		7.4101		7.34062		6.75306
	5.11427		6.66078		6.76266		6.63321		6.51465		7.95621		6.11094		4.88847		7.39608		8.61635		6.56161
	8.01347		7.04795		8.31685		5.8891		8.58289		7.66936		4.8929		4.3244		6.88211		7.24722		7.41402
	5.6749		5.32457		10.1732		7.52498		8.85481		7.34976		6.8644		5.14912		5.22176		7.18749		6.43933
	5.43851		5.22811		5.818		6.82481		7.9351		7.94456		7.96301		6.25115		5.66677		6.23971		8.00149
	5.2865		2.87356		5.65445		6.46078		6.54733		6.21878		6.9363		5.65238		4.80509		8.32288		6.9084
	6.0334		7.09699		8.72193		6.87115		7.73364		7.83384		5.18939		7.60771		5.79134		7.65157		5.22176
	3.5995		7.03868		8.27999		6.90544		7.42463		6.4617		5.79314		5.38857		6.85262		8.22321		6.2443
	6.2223		6.03481		6.49077		6.54479		8.92824		3.93828		5.95547		7.7933		6.17923		7.48736		7.09845
	7.12918		6.89773		9.64519		6.78225		6.89354		7.40113		6.73919		4.78063		6.66304		8.27429		5.8693
	5.83194		6.41934		6.94771		6.8067		7.77538		8.98407		6.94202		6.56411		7.12301		8.14861		6.69639
	5.5431		5.73195		4.74537		5.78229		8.14861		8.32946		6.38809		5.77864		6.05023		7.82539		6.13422
	4.3399		6.38112		5.24069		7.50017		4.9362		8.88287		7.15393		7.94477		8.26795		6.61282		7.13436
	6.86932		7.42604		6.57487		6.33721		9.20726		8.92605		6.37007		6.02202		7.89985		5.39929		7.1428
	8.37564		3.81617		6.60247		7.56308		6.57815		9.08249		6.69201		7.81497		6.46446		7.9667		7.67458
	6.54479		6.74823		5.68698		7.62888		6.23162		7.6036		6.22814		6.12135		6.81126		7.67101		7.22255
	8.11266		5.65652		6.15071		3.10995		7.02355		7.663		6.68981		6.57157		6.11616		6.42701		6.89175
	6.11876		5.02144		4.65975		6.3393		4.3244		7.87572		6.68466		6.36501		6.61598		6.34242		6.94487
	3.21004		4.50932		6.05301		7.10477		6.63554		7.49395		7.13577		5.12836		6.82288		7.74825		6.86008
	8.07132		7.0066		7.39897		1.26413		7.73001		8.12897		6.24316		4.82895		7.43164		8.19136		7.01193
	4.63715		5.96309		8.4336		7.17311		8.07757		7.41898		6.03198		5.31301		7.28999		6.84574		6.63863
	4.30068		4.24305		7.93742		6.97179		7.81306		6.26134		6.54054		7.65521		8.15491		6.29238		6.43177
	4.83366		6.04325		7.71196		6.82929		7.79937		7.67018		4.4491		6.735		7.38075		8.73625		6.89594
	5.06335		6.58795		6.53198		6.90307		7.35468		7.93953		6.09377		5.44363		7.33717		6.6993		7.14093
	4.75557		4.77567		4.71411		7.02723		7.35995		8.45631		6.64172		6.38809		7.30834		7.71985		6.72016
	6.44872		6.678		6.201		5.31881		6.74477		8.71875		7.68195		6.58469		6.4543		8.01308		6.79422
	4.91045		4.38502		10.0196		7.06372		8.31092		3.27903		7.36892		6.08037		7.12728		8.48949		7.79864
	7.5846		5.46882		8.89838		7.79719		5.93227		7.8615		4.3244		5.41254		8.62179		8.9943		7.82303
	3.51542		6.15573		6.50499		6.83183		5.36125		8.26507		6.96178		6.26807		6.30755		5.8354		6.81255
	5.20894		7.21694		8.37645		5.18279		9.08731		8.28029		4.72464		6.24086		8.76604		8.02686		6.92187
	2.30558		6.68614		6.87725		2.7682		7.79695		7.6784		4.60227		5.05962		8.25131		6.79091		4.98982
	5.86596		6.27587		5.23442		5.6749		8.05235		6.03904		8.10521		7.75434		6.40579		7.36594		6.65168
	7.1622		5.76579		4.40684		7.11489		7.48967		8.1672		6.19259		5.1661		5.9354		7.82563		6.57651
	8.87424		6.70221		7.75813		6.19379		7.56491		7.94058		7.36594		5.53848		4.42819		8.02358		6.83691
	5.92442		8.08868		5.73957		4.54754		7.49494		8.23439		7.06423		4.75048		5.57716		8.15457		6.8644
	3.4797		5.55001		5.68297		6.06541		8.16116		7.61647		6.08977		5.16273		5.65652		7.13718		6.07767
	4.8147		7.57253		7.9529		6.99585		8.00543		7.43999		6.55239		6.46078		8.33683		8.56808		6.13932
	3.46135		4.57223		7.58579		5.96612		8.22178		4.08749		6.6653		6.98444		5.0292		8.5585		6.35069
	4.57831		6.4543		8.51358		7.23198		6.6698		7.3016		5.56368		7.68683		8.84898		8.89685		5.82325
	7.22813		5.67085		7.09894		7.50797		6.89773		7.68059		7.37707		4.41401		6.8093		8.58719		6.58225
	4.39962		5.90852		7.97931		6.62307		7.37596		7.41046		7.20955		7.34368		6.08172		7.43513		5.58826
	4.33218		4.29265		5.06335		7.47037		7.60478		4.76567		6.00033		8.06948		5.18279		8.38901		4.80991
	8.21286		5.12836		5.43851		8.23172		7.46868		7.44449		6.3731		6.05162		5.97815		7.9665		5.78773
	7.37891		7.08223		8.90569		6.69785		6.94941		5.93851		7.01934		4.64852		7.65381		7.23454		5.20247
	4.55996		7.40077		6.2176		6.52509		7.99315		7.39608		5.55687		5.1661		5.89886		8.17521		2.36274
	5.21537		8.87589		4.11676		6.95054		7.13484		7.31543		5.99593		6.14187		5.98708		7.05917		7.28231
	6.2293		7.09405		5.3529		7.82067		7.1287		8.66016		6.66905		6.26359		6.19138		4.42819		5.94934
	7.85214		6.35788		6.90485		6.53456		7.62629		7.75561		4.56612		7.54888		7.27947		7.46666		5.39126
	6.41645		5.10358		9.82333		5.59266		7.10719		8.21062		7.17853		5.818		7.39572		4.62566		5.30718
	7.00926		5.71459		8.32903		7.3012		6.63941		8.1527		9.05427		7.09356		7.2908		7.76441		6.68687
	5.10716		5.15254		8.85842		5.3529		7.11537		8.17902		7.03193		6.60885		7.43826		6.81709		7.00338
	6.30216		3.34357		6.61361		7.45034		6.81579		6.74754		6.72087		6.09244		8.23595		4.79049		5.89886
	4.22596		6.20458		9.14329		6.01195		7.90553		8.40735		7.29601		5.92442		3.40419		8.0656		6.71802
	4.60227		6.39007		4.42113		5.9354		7.68791		8.24156		5.85418		5.42561		4.3399		7.21564		3.36419
	4.85686		7.42569		5.3101		7.49132		7.07776		8.79764		7.33525		5.37226		7.50538		8.27699		6.69639
	5.45378		5.77132		7.18794		6.57651		8.02936		7.02092		6.85822		4.46958		4.99383		7.88086		5.22811
	7.89305		4.79049		9.01093		6.29129		7.46362		7.3012		5.88746		8.67074		6.82737		6.86625		6.86993
	5.95394		4.54754		2.36274		6.64633		8.20677		7.13295		6.02059		7.68276		5.08914		4.98176		6.90129
	6.58714		6.71874		7.35958		7.3592		6.30648		6.99531		6.25342		5.96005		7.1713		6.92303		7.18257
	4.52222		6.08306		8.31973		6.68981		7.48869		4.57831		5.46882		5.43079		6.47906		7.31229		8.14348
	5.15595		6.27142		6.53456		6.38212		8.19217		7.90987		5.83021		6.43461		5.83021		8.08759		3.84182
	8.4643		5.22811		6.1974		6.13805		6.48808		7.65994		5.66473		6.723		7.68602		7.35468		6.86932
	7.33294		7.45989		6.28361		7.36108		7.94016		4.29265		6.6653		4.43521		8.7029		7.00016		8.09067
	6.11224		6.29565		6.59523		6.45708		8.47137		7.25351		5.07449		7.32907		7.60566		7.14838		5.97215
	8.36374		4.97363		7.64453		6.73289		8.03013		4.80024		6.5129		4.87504		6.05162		8.17371		5.41517
	7.37744		7.21434		7.89018		5.25926		7.65521		6.60726		6.42605		7.52179		7.24132		6.49345		5.69097
	6.66605		5.8776		8.23861		7.41898		-0.527633		7.78818		7.18927		8.71527		6.75306		7.78989		6.87482
	6.11876		4.61403		8.74418		6.93516		7.57314		8.33428		7.18033		4.87504		8.03759		4.59633		6.55576
	6.99097		4.67086		8.20516		6.657		6.99747		7.90857		7.46969		7.61501		5.40726		7.91376		7.21216
	2.60786		6.36094		7.49395		7.02513		6.79091		6.80015		6.60486		6.72087		7.81211		8.74248		6.58388
	7.05102		6.72229		8.02087		8.12076		6.16693		6.88875		6.8067		7.10088		5.67085		7.58219		3.08329
	7.33217		5.38857		8.08341		5.96612		6.71874		7.77958		5.90047		6.85138		7.41402		7.86354		6.46262
	6.42126		5.66677		8.31439		6.735		8.0589		7.85374		7.3637		6.54139		6.60407		5.41779		6.50234
	8.55271		6.3		4.85686		7.28394		6.2223		7.97058		5.64823		5.38857		6.64556		7.0007		7.58819
	4.57831		5.23756		6.72655		7.33486		6.14567		8.24745		6.50322		5.17615		3.99416		7.35958		5.15595
	4.05733		6.52249		8.27489		7.13999		7.88331		8.33867		7.07676		7.7781		7.62457		7.55477		7.93214
	5.89724		6.82353		4.74023		6.13932		5.79852		6.49613		6.4431		6.66304		7.57828		7.05358		8.21078
	4.24305		6.11746		8.76337		5.39395		6.52682		6.68908		4.76063		7.26182		7.44449		6.12909		5.15254
	6.83056		6.8607		10.3536		6.1731		7.11585		8.47605		5.16273		8.29041		4.09734		7.3452		6.27476
	5.3473		5.92914		7.66798		6.34138		7.16357		7.26016		6.54224		5.61225		6.22113		8.685		6.42222
	2.65042		6.36805		9.1281		6.46813		8.07114		6.78825		3.81617		6.52682		7.20386		7.24132		6.08575
	5.83712		6.43556		6.59038		7.69358		6.30324		8.28551		5.89399		5.11072		6.45337		8.38699		6.34138
	4.11676		6.27476		5.3101		6.57487		8.49746		7.61472		5.66473		5.3501		7.17673		7.11297		5.17615
	6.58388		6.53883		8.45631		6.86993		7.13248		8.42975		7.02513		6.72866		6.81967		7.53763		5.818
	4.87053		5.97815		5.43595		6.73919		6.39403		8.5759		6.61282		5.80565		7.44621		7.5846		6.71517
	5.46882		3.38439		3.8031		6.47361		7.08074		8.41313		2.90635		6.6854		8.04518		5.11072		6.51203
	6.69274		6.60247		8.18562		6.43366		6.82353		8.14211		6.04744		7.20605		8.45981		8.90585		7.21737
	6.6993		5.6187		6.11355		6.9926		8.60981		9.26056		5.07817		7.22427		6.72937		6.26583		5.09277
	8.77163		7.4754		6.65472		7.16813		8.28907		8.54333		7.27825		6.67354		7.24428		6.7385		7.53857
	3.10995		5.49339		4.6873		6.41838		6.37611		6.31184		5.45378		7.51507		6.70438		7.29801		5.96914
	5.0292		5.46383		6.13805		6.99585		8.6679		8.19674		5.45882		5.07449		8.59202		8.00327		5.96157
	6.98334		6.74892		6.24887		6.09776		7.27417		1.87026		5.91331		3.99416		5.60793		8.39662		7.25726
	6.74754		7.39354		8.20644		6.52768		7.77016		6.47816		6.18775		7.48339		6.06951		6.35275		6.74754
	6.56328		7.81449		4.30068		6.2792		8.16368		7.6871		7.33832		6.05854		5.73386		5.95241		6.22697
	4.74537		5.39662		7.15347		7.99136		9.92212		7.61356		5.19921		6.08172		7.31622		7.80227		7.23539
	6.3871		6.25682		5.98708		6.66304		4.99383		8.32231		5.71653		6.60006		7.73131		6.34863		6.44216
	7.15991		7.41081		8.78228		6.48808		8.03892		7.38222		7.51539		4.483		6.78425		7.76316		7.44172
	4.39235		5.86093		5.19921		7.45342		6.96735		6.66605		5.44363		6.98225		7.25809		7.70746		6.3
	2.36274		6.24086		5.63988		5.65031		7.0246		6.85884		6.735		4.82895		5.19595		6.6854		5.22494
	7.23751		7.59028		9.15102		7.41792		7.92299		9.03519		5.57044		7.2811		6.82992		8.22653		6.02915
	4.84765		7.0916		7.68113		5.75837		6.6683		2.7682		5.61009		6.04045		6.97896		6.96846		5.36677
	5.98411		6.86255		8.33272		6.83565		6.61361		7.18078		5.96309		6.86008		6.96735		8.65934		6.2803
	6.05578		5.0855		5.55001		7.40831		6.96902		5.65031		8.94284		5.12836		7.96711		7.76592		4.4628
	5.04071		5.78229		7.77439		7.32636		6.93458		8.43834		6.85884		8.01503		6.97896		7.00713		5.3303
	4.75557		6.97731		6.48718		6.82224		7.52879		6.32355		7.01086		6.04884		6.23971		8.79505		8.00936
	4.22596		7.16585		9.11527		6.2891		8.76281		8.71798		6.77486		4.74023		6.47361		3.13593		4.68185
	6.01484		5.95088		8.3067		6.18167		6.15698		7.01511		4.60227		6.723		6.92824		6.96902		6.10963
	6.42414		6.1694		7.75003		5.48118		6.87482		4.64285		7.05205		6.79289		8.22779		6.28471		7.93637
	8.66901		7.16767		5.96612		6.48808		1.08181		7.55631		5.07449		10.5077		4.50281		7.73776		6.62385
	5.35569		7.53417		4.56612		7.03349		8.55726		7.74417		7.37928		6.01484		8.8294		7.86332		6.80408
	4.65975		6.00761		6.78425		7.292		8.09877		8.78508		7.35204		6.82031		9.24535		6.69712		4.87954
	5.49823		5.92126		7.18212		7.22813		6.50411		4.92769		6.0047		7.29561		7.00606		8.25484		6.43556
	3.58324		4.59036		7.28555		7.77661		7.49919		8.03032		7.36033		5.2865		7.18749		6.01051		7.08569
	4.29265		4.4628		8.53177		7.42884		6.48178		7.74136		5.83884		7.2043		6.14693		8.13383		7.16858
	6.85636		8.72682		7.14698		6.52509		6.7385		7.68276		7.68059		5.26842		5.06335		8.18776		6.61361
	4.59036		5.15595		4.49625		7.44724		6.66229		7.79743		5.13879		5.61655		6.81773		7.1663		7.36145
	7.34787		7.12111		6.90307		7.86309		5.25002		6.75513		8.10876		6.09244		8.55043		7.46261		5.54771
	6.31825		7.70214		5.00576		6.38411		7.03661		5.23127		6.04325		5.28051		6.89295		8.17321		4.6873
	4.26816		7.21216		6.26695		7.58998		7.53606		7.30913		4.50281		4.19087		7.47673		7.51346		5.35569
	6.56992		7.86694		8.74201		7.62139		6.7378		7.61501		6.27698		5.13879		6.13422		6.97786		5.84227
	9.41479		5.56594		6.66078		7.57192		7.99911		6.1986		8.04177		9.1003		6.4365		6.06815		5.5523
	8.26355		7.01987		4.67637		6.63321		6.46996		7.28636		7.04898		5.16273		6.33093		7.60507		5.56594
	7.17085		5.3101		8.73121		7.45171		6.89055		7.98294		5.57269		4.51579		7.1038		8.38025		4.94883
	7.48902		4.43521		5.55459		7.52974		8.96668		6.78425		6.74268		6.79422		7.17266		7.46464		6.53027
	7.20034		5.78953		4.83366		7.90748		7.12206		8.09662		6.97179		4.74537		5.72041		5.84739		5.10716
	8.3839		6.00179		6.28581		6.4663		7.86173		8.68899		7.17718		6.02915		8.85616		4.31655		6.72584
	8.57912		5.73195		8.39556		6.03904		5.24381		8.33386		6.2293		4.77068		7.71038		6.81902		6.08037
	5.79134		7.43478		7.83664		8.18743		4.82423		7.45273		7.51699		7.93995		6.4203		6.25682		5.97964
	6.8576		7.22126		7.27743		6.20815		7.65744		8.28551		6.71445		7.31229		7.32636		8.32489		6.53027
	5.5431		6.76674		6.16197		6.75306		8.14262		8.85473		8.1493		5.13533		4.55996		9.11825		5.89561
	8.23673		4.58435		7.05765		4.19976		7.16448		7.37189		6.61756		4.3244		8.29277		8.78878		5.15595
	6.10041		6.44872		5.79314		6.64095		8.90976		7.84546		6.83501		7.31896		7.64453		7.6211		7.41188
	6.30863		6.50411		9.06824		6.84825		6.93917		4.86599		6.70293		7.59533		7.41969		8.42536		6.61598
	6.43177		5.52446		4.37021		6.63941		7.64114		6.82481		7.20955		7.2585		7.76542		7.6306		6.59362
	5.39929		8.5313		7.25392		7.32597		7.33294		7.64622		6.09776		4.41401		7.17718		6.87725		6.2803
	5.73003		6.34242		5.65858		7.06018		8.9654		8.44736		6.72513		6.15573		8.11231		8.58123		4.36272
	4.9858		6.85013		8.42523		6.66002		7.59711		4.60817		6.53198		6.02488		6.7357		9.32829		5.91012
	3.84182		6.92012		8.60604		7.19946		7.98636		7.28515		5.50785		5.30131		8.13019		7.5202		5.0292
	6.40188		8.10467		8.3457		6.99585		7.30279		8.13349		5.5221		6.31505		7.88908		7.16448		5.12836
	8.2372		5.17615		7.3012		6.98061		8.01191		8.12619		7.36519		6.41162		7.40724		8.33895		5.90209
	5.13879		7.1067		7.71696		7.14233		8.01308		8.31872		7.0167		4.37764		7.54639		7.40257		6.29456
	8.79657		6.90781		6.66078		7.42884		7.00016		7.68249		7.75687		2.41681		7.41686		8.40154		7.15069
	6.39205		5.72041		5.75276		5.64407		7.29321		8.08214		6.38511		5.14912		6.54054		4.22596		7.35279
	5.85925		7.5044		7.08322		7.49362		4.63142		8.04594		6.84008		5.9974		8.76604		7.73131		5.32169
	5.8003		6.75513		7.94184		7.1977		8.16217		6.34138		6.05578		6.27587		7.63488		7.82845		7.16676
	4.11676		6.6698		4.72464		7.03141		7.18033		8.13106		6.71945		6.75924		7.21086		7.81687		7.46801
	7.65744		8.1848		6.43839		6.98989		6.46813		8.39396		7.53322		8.08651		6.9294		7.60976		5.30718
	8.59617		4.47631		7.33871		7.20605		8.02396		7.79135		9.38005		7.47272		8.25023		7.05051		6.81061
	6.0263		5.68096		6.74407		7.0225		6.9131		7.57767		7.42989		5.92442		5.17281		7.2904		5.46633
	4.02624		5.76394		8.33145		6.65244		8.0284		7.28191		7.13718		6.89414		7.76467		7.43895		4.4491
	6.76742		6.7647		8.37957		5.81273		6.71015		6.55743		7.31189		5.27146		8.38201		8.08105		5.76394
	7.4393		5.90852		9.23849		5.28948		5.45378		7.24638		6.60407		4.27639		8.40246		8.72883		6.29347
	4.84301		6.44778		5.46633		7.27621		9.28757		8.76677		6.52162		5.76948		6.96401		7.59563		4.52861
	5.91967		7.99076		6.02488		7.37189		7.77165		6.09643		5.96461		5.8891		6.70871		8.25239		7.5495
	7.06271		6.53284		5.3501		7.06372		6.75924		6.57651		7.22513		4.22596		6.90011		7.08619		5.82847
	6.77216		4.54127		7.53543		7.55353		7.5044		7.47473		6.63709		7.49461		3.82908		7.92705		7.13671
	7.64114		7.35581		7.74519		7.64988		9.47021		8.07464		7.06926		5.68096		5.57939		8.48985		7.05358
	5.67692		6.18167		7.81972		7.97668		7.84892		8.44178		6.58469		5.50065		7.0246		7.2126		5.56819
	6.6993		7.62658		6.74338		6.15948		7.19858		7.84453		6.16569		6.54394		5.3501		6.95167		7.13953
	8.00897		7.4393		7.12063		6.12394		7.60771		7.04898		7.33832		5.73957		7.63346		3.63125		5.95088
	6.18289		5.86596		5.73957		7.14466		7.55724		7.4438		6.31505		7.24848		6.34138		8.59867		7.04384
	6.97841		5.28351		9.20803		6.70654		6.84449		7.29481		6.86747		4.23454		7.08223		7.47439		5.26842
	8.11355		6.23278		4.64285		6.96568		7.59355		4.06749		6.6854		7.26265		6.0134		9.17031		6.9007
	7.05917		7.54202		8.76032		7.44449		7.69465		8.64987		6.91427		4.39235		5.4099		7.97587		6.56743
	4.42113		6.29347		7.32675		6.56992		8.8074		8.28566		6.58795		6.74546		6.94714		6.81515		6.7385
	5.13185		6.81709		8.58598		7.40581		6.69054		9.03315		5.19921		6.16569		7.44656		8.03224		5.80919
	3.51542		7.42181		7.48604		7.2643		7.38808		7.96691		5.85249		5.55001		6.92187		7.79403		6.85449
	6.60805		5.65445		8.6219		6.8815		6.88935		8.13746		6.12909		5.39662		5.3101		6.63088		6.90603
	5.02144		4.84301		8.70418		7.96198		6.55492		8.41431		6.62071		6.53027		6.81126		7.72299		6.17923
	5.7262		6.80995		4.88847		4.02624		8.07188		7.8728		6.946		6.69858		6.14187		8.42885		6.41742
	5.9478		6.41162		7.52147		6.63088		7.12681		6.68023		6.01915		7.51635		5.87428		8.26309		7.30001
	3.4797		7.03661		9.113		6.31931		2.65042		6.75924		5.83712		2.80457		5.86428		7.4393		7.00713
	8.20709		5.40461		8.9181		7.05256		7.66078		6.34242		6.60965		5.62297		6.39403		8.88752		4.54754
	7.03297		7.85534		7.34406		6.15948		7.19372		8.30218		7.44999		4.16372		6.64862		7.07127		7.4165
	6.68761		5.98708		4.42819		7.22083		7.85374		7.61966		6.4431		4.67637		6.65472		6.87847		2.56341
	3.49772		6.8119		5.4282		6.2223		7.24932		8.17088		7.23198		6.88573		6.48987		7.40473		6.66304
	6.41742		7.37781		8.33414		3.38439		6.77216		7.64114		6.81061		4.94043		5.97065		9.00935		6.27142
	5.25619		5.55914		6.06951		7.08767		9.13842		8.15795		7.45512		4.76567		5.98856		8.2442		6.58714
	5.87096		6.12006		2.60786		6.82609		6.44497		8.32817		7.37004		6.47816		7.09258		8.18513		5.08914
	5.23127		8.11831		5.62084		5.23127		7.72872		7.48372		6.88392		5.15934		4.98176		7.37965		6.47725
	1.41828		5.48118		7.69465		5.55687		6.99855		7.65716		6.06951		6.74754		5.12836		7.79087		5.36125
	6.64479		6.48358		6.94544		7.13624		7.07527		8.40286		6.70582		7.68195		5.64407		7.49165		3.05589
	6.37611		8.49493		7.49526		6.99314		5.96461		8.35587		8.24699		7.03193		8.03663		6.49077		5.37226
	5.31301		6.24316		9.443		6.72725		3.64675		7.10428		7.63403		4.95301		6.57322		8.71032		7.5597
	5.44107		6.53798		6.71659		7.37078		3.6155		7.61297		6.63786		4.91478		6.50322		8.27624		5.22176
	4.71411		5.58826		8.32016		7.50797		9.74189		7.90051		6.78825		5.75837		6.27365		8.09536		6.58632
	8.24699		6.46354		8.09895		7.48736		6.75513		8.74022		7.20254		6.19138		6.89175		8.83362		5.20247
	4.45597		5.89073		5.7262		6.6638		7.81091		6.52422		6.85325		6.47088		6.1974		7.02355		5.96309
	5.27146		5.825		4.95716		6.9629		7.31896		7.8133		7.06271		7.93974		4.24305		5.96612		5.93384
	7.23369		7.8066		8.47912		5.15934		6.7123		7.83524		5.10358		10.1317		6.0047		7.68927		7.8981
	7.37448		5.72427		7.24048		6.40676		8.11001		7.2139		9.29356		5.92757		5.76394		5.75089		5.1661
	7.13389		7.1663		3.72086		6.90662		7.09209		7.80154		7.1622		6.88814		7.37928		8.15541		6.3
	4.56612		5.97964		8.2159		4.37021		7.74519		8.12828		6.93228		5.54079		8.10947		5.71069		6.74961
	4.94883		7.44414		8.21462		4.3244		8.14793		5.86763		7.19549		5.16946		5.92442		7.29761		5.08184
	4.19976		5.22176		4.30865		8.0121		8.78119		7.41686		6.53284		5.48118		6.53627		7.51635		4.70881
	5.97815		6.79488		4.79538		7.15945		6.45523		8.35434		7.52116		7.47506		7.66549		7.11441		5.51737
	4.77068		6.71802		5.31301		5.39662		5.93071		8.15795		6.52509		5.85079		6.44122		4.81947		5.90852
	8.00366		6.56577		5.3529		7.67731		6.3097		6.62776		6.32249		4.30068		4.17285		4.24305		5.54771
	6.54394		5.35569		6.71874		7.36743		9.7095		8.24575		8.10717		5.41254		7.41508		7.27294		5.56594
	6.6638		4.27639		6.75306		4.86144		7.25642		7.88242		6.20696		7.58219		6.71517		6.4365		7.24217
	8.41391		7.01881		8.84975		6.53627		7.01829		8.36964		6.41645		5.95547		4.70348		7.956		7.27089
	6.93055		7.0204		5.4563		7.74621		7.57828		9.25397		6.03481		4.78557		7.41544		7.4707		7.05612
	8.12252		6.29347		6.06815		6.3476		7.28677		6.46996		6.81255		4.27639		7.626		6.02915		7.04178
	5.52446		6.4365		6.06129		5.84739		6.62464		8.15474		7.27089		5.48608		6.45244		7.5005		7.2904
	4.75048		6.91016		6.96345		6.98826		8.53733		7.65549		7.06926		7.14698		6.51115		7.05816		6.75238
	6.0263		6.65244		7.31229		4.34756		8.30758		8.18562		6.63399		5.17281		6.28581		8.11036		4.6873
	7.15116		7.14791		8.01795		5.00576		7.30438		7.81948		5.60359		7.44276		7.0965		8.06504		5.98114
	5.83367		6.8687		6.87968		6.16569		7.70374		5.91012		6.47361		6.22697		7.67677		7.44828		7.19105
	8.47937		7.61879		7.35882		7.62052		7.33525		7.49395		7.26554		7.80058		7.27376		7.01617		5.82151
	7.35355		5.28948		8.76235		6.48987		7.68412		5.99151		6.68981		5.49339		7.44311		4.34756		6.16693
	4.90609		4.44218		8.64386		7.93764		7.0392		4.00497		7.05816		8.89062		8.61207		7.37411		6.34034
	4.8147		7.09405		5.33884		7.06775		8.02897		7.27621		7.60066		6.21525		6.20577		8.49046		5.825
	6.8312		7.53857		6.60407		7.8615		6.78692		7.05612		7.96424		7.37115		8.144		5.3501		8.07812
	4.12633		6.18775		9.22898		6.91837		6.33826		6.30863		7.24764		7.94079		4.87954		8.44331		3.56671
	6.32672		7.09503		9.06926		6.51814		6.41934		8.07702		6.04045		6.88754		7.92854		6.50234		8.04821
	5.12486		6.48178		7.04229		7.15853		7.49231		4.39962		7.07427		4.13581		7.02145		8.38403		7.17357
	6.83056		6.41162		6.76198		7.42814		7.69465		8.34527		7.21824		6.78091		6.55743		7.99276		4.57831
	6.79949		7.12254		7.48967		8.14022		7.15023		7.96711		6.88634		6.1355		5.57493		6.8644		4.95716
	4.51579		7.31935		10.4705		6.04744		6.83438		7.73776		6.70582		6.97511		6.23046		8.46505		6.92012
	4.42113		6.61203		4.88401		5.77864		7.5834		8.83208		6.67652		7.0082		5.77499		8.04575		6.4543
	5.59705		6.54224		7.50278		7.05663		7.55816		4.91045		5.50785		9.28812		5.63146		8.45355		7.01776
	7.46125		6.02772		9.71941		7.56675		7.40903		8.08995		7.61501		6.46813		7.0225		7.18436		6.06267
	5.57269		7.70054		7.14419		5.74713		8.10556		8.66424		6.97896		7.34062		7.99495		7.50473		5.11427
	4.57223		6.59685		8.49288		6.15071		5.89399		5.77315		6.26919		4.08749		6.59362		7.18212		7.66715
	3.51542		5.38316		2.99873		6.75719		7.66355		7.84546		6.97841		5.16273		5.16273		9.08904		5.13879
	5.07449		6.9207		5.37773		6.51378		8.19511		8.39888		6.93688		5.4563		8.66189		8.72978		7.1999
	5.09638		6.88211		6.51901		6.40871		7.28313		7.73053		7.25726		5.30718		2.65042		10.095		6.94145
	5.14225		5.34449		9.17258		5.21857		6.33513		9.00058		7.6283		4.00497		4.91478		3.961		7.29441
	8.62126		4.16372		8.21078		7.65688		6.89773		6.94827		7.05866		4.50932		7.72664		3.53281		6.13422
	1.08181		6.30324		8.85304		7.34597		6.64939		8.02531		7.75333		4.91045		7.61472		7.2409		6.95617
	5.14225		7.07676		5.73195		6.70003		7.08124		6.51901		7.15069		8.43872		6.60726		7.54702		6.22581
	7.153		6.36906		7.60419		7.29241		3.961		7.11105		6.75238		6.48358		7.01193		8.42212		5.25926
	4.64852		6.86131		7.70374		7.24259		6.76334		6.79422		5.59266		6.06129		6.31612		7.98535		6.84008
	7.17266		7.63517		5.73577		4.31655		6.38411		8.84219		5.47378		3.69187		5.97964		8.13798		4.83366
	8.2016		6.76129		3.84182		7.34062		5.23127		7.2247		5.62723		7.15439		7.44862		9.14757		5.50065
	5.3501		5.90047		10.8691		7.6185		6.40871		7.67704		6.10437		4.67086		5.28051		7.04795		7.39861
	5.68297		6.23046		4.08749		5.26233		8.55214		8.02724		6.81385		7.73364		8.47149		10.003		8.0003
	2.4681		7.88642		9.1128		7.90007		6.8119		9.37315		6.8119		4.77567		7.74749		7.03971		6.18411
	7.14466		8.0856		7.93087		7.8013		7.95724		6.28141		6.70293		5.51262		3.34357		7.72299		7.18257
	6.70148		7.70534		7.61676		7.05154		8.49227		5.93851		6.80015		5.60793		6.47361		7.31071		4.39235
	6.64402		5.21216		7.35166		5.80919		8.3549		7.92939		7.09503		5.96309		6.23162		7.38075		5.59486
	5.20571		5.93384		6.63786		5.79673		7.537		8.69206		7.39644		5.45882		9.05572		7.4754		4.61986
	5.43595		6.58143		7.05256		5.91491		7.80371		8.16787		7.31071		6.14313		6.9294		5.38316		5.49581
	8.44204		5.74901		7.24512		6.79686		6.61519		8.29351		7.08569		6.38908		7.02618		7.68819		7.14791
	8.64739		7.27417		8.04651		6.47179		8.1295		7.93679		5.87594		7.97323		5.16946		8.31439		7.05256
	5.47625		5.87925		6.39106		6.93688		8.19185		8.30874		6.12265		5.47378		6.5129		6.68834		5.89073
	5.63988		5.66473		8.29705		5.94317		7.59147		3.90318		6.86255		8.44572		6.35378		7.64622		6.38809
	6.48358		7.00177		5.3303		6.07224		7.7872		6.88271		6.35275		3.78986		6.60166		7.40652		6.49524
	6.29129		6.46078		7.02565		7.52403		6.94487		8.62349		7.13201		7.91376		7.27662		5.71847		6.0951
	6.2176		5.64198		6.54479		7.79816		6.95336		6.12265		7.07227		6.77486		6.48987		8.45493		6.74615
	4.3399		7.04178		9.76441		5.9974		7.49099		7.3111		6.85325		6.82992		7.391		8.78472		6.30432
	4.07754		6.93974		7.46969		6.98771		6.8067		8.29925		6.09377		6.24201		7.05511		7.11057		6.08575
	8.3357		5.80919		7.27621		6.68761		6.93573		7.08767		6.90248		6.42414		6.09111		7.84407		7.57071
	5.30425		6.53198		6.83247		6.59362		7.76542		6.82031		5.73957		7.98314		7.26058		7.2447		7.08767
	4.66532		7.30636		7.93172		7.18436		4.39235		8.01073		6.45337		5.62935		7.11872		8.54574		6.59281
	5.61655		7.44449		7.57344		6.36805		8.04272		8.71711		7.46734		6.06678		6.57157		7.30874		4.67637
	6.19259		5.58826		4.50932		7.60859		7.77165		4.9858		7.36818		7.44552		8.48779		7.51763		5.50785
	4.43521		6.97566		3.67706		7.36669		7.17808		7.98374		6.8216		6.43366		7.76517		7.40867		6.33513
	7.05		5.63146		8.90929		5.01754		7.91008		7.93151		7.43965		4.80024		6.97179		5.375		5.50065
	4.25986		6.5294		4.74023		5.83712		7.52371		6.3548		7.14186		8.15134		7.26224		7.86013		6.56078
	8.19609		6.71302		5.17615		6.66455		7.69062		8.30685		5.76208		8.64293		7.32597		7.32636		7.81282
	4.89732		6.14945		7.7604		5.0521		6.08441		9.11306		7.13295		5.07079		5.65858		7.75485		6.70727
	6.69712		6.12006		4.28455		6.68834		6.39501		7.09454		7.00606		4.74023		7.53983		9.28992		7.49329
	6.97841		6.25115		8.27489		7.41969		7.39861		8.42108		7.47104		6.07496		6.12652		8.53571		7.24301
	6.86686		5.10716		7.0392		7.75536		6.48268		7.79428		5.76579		5.17281		4.62566		7.24512		7.56644
	6.90722		6.60646		8.59562		7.26637		7.57556		6.71874		5.70678		5.91012		7.73544		5.40461		6.35172
	3.05589		6.15573		8.88932		7.35581		7.98012		8.12723		6.3731		9.11838		8.16988		7.97404		6.33513
	7.02984		6.54054		7.47137		5.90852		4.36272		8.14211		6.21289		7.42919		8.22289		4.90609		4.49625
	7.4707		5.53848		5.80565		6.44497		7.77661		8.57021		6.3871		4.74023		4.87053		7.42111		6.08575
	8.12984		7.19327		7.61821		5.1661		7.91699		9.18621		6.93171		4.25986		7.19416		7.4393		7.08322
	4.25149		6.30108		7.72716		7.41615		7.89745		8.19966		6.91369		3.91502		7.48206		8.31077		6.93401
	5.0018		6.83438		9.05406		5.18279		7.77661		8.07335		7.81711		5.74901		6.18775		3.25656		7.12254
	3.6155		6.33408		5.76763		6.35172		8.79452		7.99256		6.88513		8.21494		6.75306		6.22581		6.33721
	6.0951		6.97179		9.58006		7.14745		6.84071		7.06221		7.0007		6.37812		8.7541		6.83311		6.66605
	5.93696		6.3097		6.61598		5.17281		6.84511		7.26016		6.93802		6.61123		7.0847		7.05102		6.35275
	3.86682		5.57044		8.60615		6.01484		7.77587		8.51653		6.23971		4.91478		7.54046		4.54127		6.3741
	6.17678		4.76063		9.03315		6.723		6.38312		6.32778		5.76763		6.23046		6.9294		7.25183		6.11094
	3.40419		6.47088		7.70985		6.35275		6.79949		7.5348		6.53627		5.57716		7.95786		4.06749		7.30834
	6.04605		6.52768		8.64136		6.57651		6.72513		8.76475		6.81838		5.43337		7.15347		6.61993		6.08843
	7.12015		4.80991		4.78063		7.51667		6.80408		8.38403		6.60805		7.37781		8.32174		7.96301		5.13533
	4.58435		7.40974		6.30432		6.33303		8.27609		0.57098		6.89713		5.93227		4.07754		8.14674		6.51115
	7.45342		6.58225		9.00043		8.40709		7.78032		7.83478		6.82801		6.32249		6.74129		7.63802		6.74338
	5.53615		7.29761		4.19087		6.68981		8.14383		6.92535		6.45616		5.9037		6.42891		8.41287		6.01628
	8.78083		4.97363		7.00285		6.64326		8.04745		4.80024		5.09638		5.94007		6.72087		5.9974		7.06574
	3.40419		7.11824		7.24596		6.41838		7.16265		7.74723		6.97786		7.45649		7.01934		7.06271		6.93917
	6.56494		4.84301		5.90047		7.51667		7.33832		8.42665		5.44618		6.96401		6.11746		7.19504		6.83944
	7.37152		3.34357		7.67512		7.45581		7.10864		7.99216		6.57487		4.4628		5.51974		7.17537		5.957
	7.7357		5.33315		8.25821		6.6698		8.07335		8.22999		7.19016		3.91502		6.80015		5.13533		5.64198
	7.91656		6.9207		8.02319		7.40509		7.44483		4.19087		6.69201		7.97931		7.8301		6.37108		5.36401
	4.50932		7.04178		6.32883		6.34863		7.05102		6.90781		7.03141		7.54014		9.13321		7.93405		6.9926
	4.65415		5.94162		3.81617		8.45656		7.9351		6.93745		6.78359		8.33909		6.22113		7.85237		6.66304
	4.55996		7.09209		8.26946		7.15069		8.02609		7.55384		6.91954		7.67895		7.38296		7.35581		7.09601
	4.53496		7.62687		8.80298		6.83056		7.34711		8.32403		6.28251		6.07631		6.92361		8.74502		5.35569
	6.36805		6.56161		9.2529		5.29245		7.49198		6.32567		7.04949		4.23454		7.19858		8.17471		7.71959
	3.6155		5.24069		8.15032		6.09776		8.01737		6.98771		6.29891		7.41508		6.59119		8.43655		6.90781
	6.71945		5.50305		5.75089		5.96157		8.28476		8.42147		7.53069		5.01754		5.13879		8.25223		7.27988
	4.55377		7.02198		8.41287		5.55459		3.82908		7.92406		6.21407		5.52681		6.9084		8.79479		6.06404
	7.391		7.28838		7.57435		6.30108		4.79049		8.85372		6.51901		5.01363		6.28251		8.45141		5.44872
	7.70879		7.27253		7.2165		7.03193		7.17266		7.66715		6.78559		8.24156		8.16435		7.75206		7.78057
	6.79223		4.13581		8.44038		6.1444		7.51023		8.67225		6.70076		6.87421		6.61677		8.19103		6.1986
	7.36855		6.9817		6.71588		7.10428		7.21607		6.92477		7.77389		4.12633		6.52336		7.61618		6.95786
	4.00497		6.68392		5.26233		7.55477		7.22126		7.56736		7.14326		4.81947		6.17433		7.41721		6.08843
	9.12328		3.56671		6.51727		7.9389		7.70454		7.90705		7.64707		6.37511		6.54902		7.45955		6.9601
	3.40419		6.36501		7.71196		6.17801		8.51901		7.46632		4.37021		6.94771		6.41259		7.2043		5.12486
	4.74023		6.31077		8.07904		7.48902		7.33679		6.4617		6.12006		5.51262		4.80509		8.62751		6.48808
	4.00497		5.73577		6.60486		5.83194		7.34024		7.29561		5.85249		5.93696		7.20386		6.36906		6.03763
	5.2865		5.0018		7.16903		5.24381		5.10716		8.37414		6.69858		7.27988		6.83438		7.31347		7.83757
	4.47631		6.43271		9.6004		6.11876		6.27031		4.85686		6.90544		6.53627		6.51901		7.70879		6.02915
	4.49625		6.38012		5.19921		6.94544		7.38332		7.13295		7.09552		6.50676		8.19609		7.91484		7.74927
	4.53496		4.4628		6.75444		6.76946		7.35657		8.66658		7.65465		7.42463		4.51579		8.35073		7.01776
	5.41254		6.37912		6.70293		7.01033		7.72586		8.27158		7.53543		4.1545		6.71802		6.77149		5.18939
	4.17285		4.68185		9.34069		6.61519		5.73386		8.9943		6.36298		4.64285		7.20649		8.25146		7.37041
	5.24381		8.15947		4.35517		5.36401		4.64285		8.3812		6.36298		5.94626		9.20679		8.17737		7.24932
	6.10963		3.30101		4.92769		6.27254		7.47372		7.59741		7.42744		7.29801		8.03204		6.91662		4.2173
	5.44107		7.03245		4.64285		6.56826		6.84197		5.52915		7.0267		6.75513		6.19138		7.7719		6.35583
	4.58435		5.99004		8.30787		7.15669		8.42484		7.87505		5.80387		7.78867		6.07224		8.20193		7.5202
	1.66959		5.50065		7.39209		7.73157		6.87725		7.32481		7.31857		6.81579		4.68185		8.80049		7.89547
	6.61914		6.28251		5.4713		7.06018		6.9007		8.11461		6.41645		5.33315		10.6683		8.30976		6.67503
	6.50145		4.02624		4.47631		7.55291		7.11729		8.34359		7.52435		5.98708		8.0589		8.31019		7.31778
	4.65415		4.94883		7.8392		7.0225		5.30425		3.99416		8.09554		7.99315		6.45058		7.01881		5.20571
	6.51378		5.47625		9.41378		6.79157		7.53006		9.1083		7.27048		4.51579		6.6713		3.53281		5.6251
	4.77068		6.40871		4.89732		6.62464		6.98006		6.89235		6.98771		5.99151		6.08709		7.26966		4.97363
	5.24069		3.23357		5.76948		6.14313		7.39245		7.53575		7.08569		5.97666		6.76198		8.9567		5.41254
	7.06876		6.12265		7.79355		7.68846		6.65548		7.26099		6.52249		7.4076		6.84511		7.60419		5.515
	6.89594		3.05589		6.21995		5.26842		7.1915		6.1974		7.19593		5.79134		4.3399		8.58454		7.51281
	4.75557		5.03305		5.95547		7.23241		7.15899		3.42361		6.57651		6.42701		7.6121		8.82516		6.808
	8.17255		5.2865		4.87954		8.37482		6.83056		8.61902		7.75738		6.0736		7.11249		7.01617		5.65445
	7.32169		6.46446		5.4713		7.29681		6.74129		8.44293		6.38511		6.37007		7.40185		8.3614		6.41065
	5.818		5.47872		5.55459		4.53496		7.15393		7.2643		7.23454		6.26246		7.35581		7.98756		7.81258
	7.09747		6.39501		8.72279		8.21206		8.17355		8.09248		7.0066		7.1999		6.11224		8.4084		6.11876
	6.48718		6.77688		5.50785		5.50785		8.2111		8.24032		7.43059		6.81579		6.68319		8.67094		6.08843
	8.61774		5.48363		5.73957		7.73905		7.59622		8.18808		6.3393		5.96005		6.25229		10.5516		5.6749
	8.77965		7.13389		6.86932		7.04693		7.60947		8.57256		6.6683		4.77068		6.75169		7.99136		6.96457
	7.95393		4.64852		8.86952		7.3252		7.02723		8.20661		6.08843		6.85636		2.24496		6.71588		6.31291
	6.02772		6.16321		6.79157		5.72041		8.68101		8.65101		7.35958		5.81273		4.78063		8.33513		5.90047
	7.22728		6.91134		5.11781		7.79888		6.79488		8.52523		6.64018		3.64675		7.34253		4.84765		6.84197
	7.79985		5.35569		5.23756		6.34863		7.69035		7.25058		5.76948		6.51465		8.20628		8.23814		7.37041
	6.48718		5.35847		3.5499		7.76916		7.62341		7.20078		6.98115		5.13185		6.96066		7.71381		5.11072
	8.02589		7.75637		6.38312		7.79961		8.5099		8.49939		5.99151		5.74146		6.86686		7.7375		6.78958
	6.86625		5.71653		5.37226		6.26583		7.61821		8.86002		7.16036		8.63184		5.48608		7.13436		5.44872
	6.09111		6.18775		7.78254		6.37108		6.70799		6.97068		6.26807		5.09999		4.79538		7.42989		6.97621
	2.60786		4.76063		6.27476		6.64939		8.47789		7.75738		8.19234		5.60793		6.51814		4.61986		6.57651
	4.52861		6.08037		7.33832		7.42181		6.64556		6.5666		7.69411		6.59845		4.28455		8.78346		6.31718
	6.10963		7.15715		6.29674		6.69274		7.10525		7.17311		5.56819		7.60036		6.20696		8.068		6.16817
	5.53615		5.94471		8.14468		6.84511		7.54515		6.90898		6.51901		5.72234		6.31612		7.52943		5.39662
	6.71802		6.4009		6.82481		7.86739		7.95786		8.25867		5.68897		7.35882		9.24238		6.65015		7.60036
	5.67085		5.71264		8.32931		6.32672		8.48985		7.29841		6.68319		5.36401		6.68171		4.90609		6.56992
	6.76402		4.73506		8.10432		6.3589		6.76402		7.61501		7.21086		6.87725		6.50676		7.1622		6.93745
	6.05578		6.83501		6.03057		6.57322		7.00177		4.83366		6.32778		5.29837		6.19138		4.36272		7.20998
	3.961		6.11224		4.67086		6.96735		7.46023		8.31454		6.99206		6.66002		5.83884		4.99782		7.11824
	6.8809		4.07754		9.41925		6.44028		8.44076		7.02145		6.12135		6.69201		8.69404		4.03672		6.22347
	5.57939		5.88746		4.62566		6.5666		4.55996		7.33871		6.95392		6.64556		7.39644		6.3054		6.20815
	6.49434		5.11781		6.43271		7.66825		6.99962		8.40021		6.98717		8.1295		6.64939		8.87325		6.54479
	6.36906		7.27825		7.55353		5.74524		7.14326		6.15448		6.74268		7.50991		6.10569		8.1281		6.99962
	4.78557		6.82609		8.97545		6.20219		8.47223		8.05722		7.13201		8.85329		7.87975		7.43652		6.97896
	3.53281		6.54479		5.52681		7.43443		8.00838		7.64227		6.38511		6.81385		6.06129		7.38589		7.21737
	7.87572		6.23046		9.7323		8.1782		4.9191		5.99886		7.03557		8.12287		3.70647		7.56949		6.58795
	6.45058		6.32461		8.75121		6.87725		9.35529		7.87818		6.53542		7.57374		6.83881		7.68059		4.30865
	5.25619		7.19593		7.79792		7.92534		7.8261		6.48628		5.27449		5.74713		6.89892		7.85854		5.64407
	6.72796		5.18939		7.63431		6.53284		7.81925		9.35151		6.61123		4.55377		6.89951		5.08184		5.65031
	7.64651		6.4663		6.94202		6.28801		7.3452		7.78352		7.60036		6.20815		6.4431		6.63399		6.80146
	6.27365		7.06775		7.73544		6.99531		8.39835		8.02917		6.52336		6.93228		5.81449		7.44311		6.43177
	5.48118		6.96902		7.83897		6.974		7.10477		7.39318		3.40419		6.0134		8.83569		7.02932		7.31778
	5.18939		7.22728		4.22596		5.96461		7.04075		7.63688		7.73286		7.03505		7.40581		7.28191		7.98153
	7.60947		6.98662		7.251		6.87725		6.7962		7.00926		4.37764		4.09734		4.3399		6.99585		7.12301
	7.04487		6.41838		8.96163		6.4543		8.85245		6.48538		7.25058		7.93953		7.64227		8.50155		6.45244
	2.99873		6.24201		6.63088		7.16448		6.72725		8.31742		5.55914		5.55914		7.35882		6.31718		5.6187
	6.1355		6.21878		8.1527		7.14373		6.40188		7.84684		6.89653		5.66268		7.13859		2.99873		6.22814
	4.45597		6.00324		7.01617		6.13805		7.34825		8.40827		6.83501		7.1866		7.31778		8.42043		6.8426
	6.2223		6.2803		8.67357		7.14791		7.99832		8.18759		8.02859		6.11616		6.83501		6.90957		5.75089
	5.19268		7.2758		6.75306		5.90691		7.70587		8.05927		7.507		5.48608		5.92126		8.34317		7.2247
	7.38735		5.74336		7.10283		6.81709		7.44999		8.46405		6.97124		6.38511		6.3861		8.46094		7.15069
	5.80742		6.11224		8.36676		7.09111		7.48571		7.16128		6.50764		3.9497		7.22942		7.40903		4.83834
	6.76538		5.85587		8.6332		6.8736		7.64057		8.63226		5.5221		5.69296		4.9191		7.92513		5.42301
	6.02915		4.94043		5.93227		4.77068		5.33315		8.85784		6.2223		5.13879		7.60095		8.03511		6.4663
	5.37773		7.86671		9.0309		6.46996		6.83944		8.34485		6.18167		6.09377		5.58383		8.07022		7.07726
	4.93195		7.28191		4.97363		5.81273		6.42891		6.75513		6.34138		5.84398		6.85325		8.60366		7.38662
	3.34357		5.57269		5.85587		7.47673		6.85822		7.10574		6.04045		6.11876		6.56161		7.15807		7.18392
	2.03732		6.60006		6.51027		6.81061		7.20166		8.85186		6.80539		7.43443		6.72442		7.9077		5.62723
	6.15948		6.83438		7.36183		7.38442		7.97627		7.40581		5.49096		5.76948		7.31425		4.80509		7.45512
	6.34346		7.05561		4.61986		6.36906		3.25656		8.37169		7.81877		6.88271		6.45151		7.1915		7.66466
	6.26807		4.97363		6.84008		7.48472		7.1096		7.6688		7.80948		6.7357		7.0546		8.04537		7.32907
	6.73007		6.34863		7.86604		7.35468		7.61879		8.31757		7.60947		5.23442		8.50286		5.24069		6.13932
	7.22513		6.87115		6.72584		7.09991		8.48754		7.81258		5.14912		5.77315		4.35517		8.23015		5.57044
	7.90204		5.07079		5.0521		7.53291		8.16402		5.43851		7.64679		7.10767		7.47037		6.75375		7.07427
	4.33218		3.81617		6.54394		6.7681		3.10995		8.05797		6.18045		8.67538		7.27089		7.11057		6.53713
	8.01425		6.22464		5.32169		7.45376		7.01139		7.35014		6.54054		4.61986		7.07726		7.57223		6.05992
	6.22581		7.02303		6.87421		7.32675		6.95898		6.82417		7.04178		4.55377		5.84739		7.42604		5.38045
	6.54224		5.54771		4.96954		6.77554		7.57918		6.66605		5.09638		7.91677		6.41065		8.27399		7.16448
	5.43851		7.65269		8.44331		6.21878		7.58908		7.42919		6.01628		5.92757		6.15322		4.77567		7.72638
	5.51024		7.93066		7.11393		5.83712		6.27476		8.35114		7.24974		6.89235		7.88242		8.38726		7.99216
	5.09638		5.92126		7.29961		5.83194		8.34891		8.54126		7.54577		4.98982		5.46882		6.93516		6.25229
	7.92683		5.66063		7.15715		7.00016		7.07975		6.47634		6.61993		5.38587		6.88513		7.84036		4.55996
	6.67055		4.96954		5.74146		6.5164		7.09258		8.99115		5.64198		7.51378		8.33116		4.67086		3.99416
	6.36399		5.09999		6.57322		7.34749		7.65994		7.69492		6.34034		7.97809		6.39698		8.25362		7.95931
	3.5995		6.37511		6.93688		4.95301		6.75238		6.50587		6.18775		5.21857		5.57044		8.13418		5.56141
	3.77643		5.78592		7.83291		6.54564		6.77621		7.87997		7.00606		6.44216		6.29129		6.58795		6.33513
	4.1071		6.14187		9.05689		7.01458		6.15197		6.852		5.60793		7.00713		4.79049		8.02454		4.67086
	6.75719		6.83628		6.20577		7.22298		6.24887		7.82445		7.09062		5.04832		6.95842		8.43783		6.10041
	5.76394		6.25001		5.23127		7.28636		6.68023		8.33201		5.85249		8.15998		7.94037		7.90792		7.18212
	3.32251		5.25926		8.18035		6.92128		5.81096		7.8692		8.48181		5.8809		5.69296		8.07684		7.12111
	7.36669		7.3115		9.02175		7.2126		7.63403		7.99276		5.76948		7.23836		6.23046		8.15372		6.73359
	5.82151		7.06826		8.14861		7.75308		7.28434		4.80991		5.58383		4.42819		7.83827		7.66521		5.825
	6.84386		6.27476		5.04452		8.25362		6.24773		6.85698		7.35128		2.51689		3.5499		8.15032		6.66153
	5.25926		5.0521		5.09638		7.09307		6.82417		7.05561		6.36399		6.95449		6.39796		7.83314		7.35279
	4.84765		6.78091		7.69331		6.69493		8.09913		6.74823		6.82865		6.95617		6.3445		7.11585		6.99962
	5.3473		6.70221		5.7565		7.76266		8.46766		8.03319		6.90011		3.84182		6.65472		7.56216		5.84909
	5.33315		5.84398		8.65184		5.62297		6.28581		8.83654		6.42796		4.64285		7.08569		7.16494		6.73429
	7.8615		4.99383		7.75813		4.54127		6.8145		7.04229		6.94259		3.46135		5.11781		8.12252		6.45337
	6.93974		5.72234		8.93727		7.57495		7.64566		7.35544		6.11224		8.21845		3.44266		8.0531		6.44965
	1.95727		4.54754		9.21045		6.32037		4.1452		6.54648		7.58009		3.25656		6.43461		6.33198		7.6566
	7.35619		6.2117		6.15197		7.11297		7.00446		6.07902		6.6653		6.27698		6.84762		6.17678		4.82895
	7.51635		5.28351		7.13436		5.67085		6.50676		7.34292		6.91486		5.34166		6.2891		8.75345		4.42819
	5.39662		6.76742		5.84909		6.46078		3.36419		8.56268		5.95394		8.46306		6.31505		7.83056		6.10963
	5.51737		5.42561		6.30324		7.10815		8.12094		7.65827		5.69097		6.51814		7.00606		7.12444		6.99747
	4.65415		6.05162		4.3399		6.13294		7.14559		7.41081		7.44999		7.0546		7.12728		7.89591		5.38316
	6.96624		6.17678		7.45581		7.42709		5.44363		7.71222		3.74903		7.18972		6.19017		8.85287		6.5129
	7.35732		6.0263		5.57269		8.35878		6.90662		8.10092		10.3055		6.67577		6.8119		6.77688		6.30755
	8.18759		6.79422		4.36272		8.3099		7.29281		6.32249		6.81061		5.72427		6.50587		8.07629		6.95449
	4.9613		5.99593		7.75206		7.75282		6.96457		7.33794		5.31591		6.13294		6.22697		6.51988		4.39962
	6.34034		7.97079		3.38439		6.03198		7.65185		8.17271		5.68096		4.6873		7.64566		6.95954		6.55408
	5.67085		6.723		6.34138		6.8644		7.83548		7.70001		7.1067		4.9858		4.31655		6.87786		5.49581
	7.44138		7.46464		7.31032		7.00285		6.32672		7.317		6.73078		6.16817		5.33884		8.92683		7.16903
	4.56612		6.00179		4.23454		5.88254		6.70943		8.07372		4.26816		3.49772		7.02618		8.53456		6.80343
	4.80509		5.68698		5.44872		7.70294		7.58189		7.79743		7.33062		7.61908		4.19087		8.09752		7.22427
	5.5431		6.11746		8.41535		6.90544		7.49984		8.00109		7.02355		5.76394		8.20209		7.55816		5.68096
	7.77488		6.14819		6.54479		5.57493		6.43556		7.37781		7.79888		5.93696		7.09747		8.57133		6.08575
	5.02144		6.03763		9.45587		6.85511		7.33871		7.80588		8.11549		6.35583		5.6187		7.39499		6.60166
	4.20857		6.48448		8.21574		6.68687		5.69097		7.94895		6.64018		4.62566		6.59362		9.15471		7.43965
	4.95716		7.14186		10.2049		7.99375		7.26637		7.09013		7.03036		3.36419		7.08322		7.30517		4.79538
	6.12781		6.39403		7.51442		6.27031		8.32532		6.96791		5.38045		5.70285		6.82609		7.62284		7.42498
	6.63244		7.00016		8.70065		6.75719		8.14314		7.44345		7.19016		6.72725		6.32567		6.91016		6.17187
	6.84071		6.64402		5.87594		6.01051		7.32208		8.25653		6.66755		6.01195		6.98934		8.74512		6.83374
	6.735		5.66881		7.03712		7.90335		7.12015		7.89525		6.72866		7.05511		5.1861		7.72377		6.56992
	4.68185		6.56161		4.91045		2.4681		5.957		8.27519		7.20078		6.77621		8.30641		8.5896		5.62723
	4.24305		6.24316		7.74289		6.4431		6.808		8.37659		6.59281		8.06262		7.17853		7.59977		4.06749
	3.4797		6.14567		7.92598		6.72796		7.43895		8.3405		7.27253		6.50322		8.17055		7.49494		6.7357
	4.65415		4.9613		8.01367		7.20736		8.08159		9.011		4.23454		4.56612		8.42627		4.92341		6.39796
	3.70647		4.17285		7.8842		6.75719		6.808		5.08914		5.52446		5.33884		6.57651		8.10378		6.69639
	7.14326		5.76579		8.72787		5.20571		3.98323		8.4873		6.70003		7.31268		4.31655		8.55873		6.2293
	4.04708		7.18794		7.23963		7.77538		7.3968		6.29674		6.35583		8.41391		6.83438		8.39289		6.04045
	8.11531		5.82847		6.46722		6.83691		8.1347		6.82224		7.37115		7.52848		5.65445		6.43556		5.59046
	4.57831		5.92914		7.3283		7.42287		7.83244		8.45781		7.21042		7.10912		3.89121		7.33101		7.62859
	5.53615		6.93859		7.79257		6.83628		8.09302		7.50667		6.90011		7.02618		7.51249		8.55453		5.25002
	4.77068		6.7962		8.41024		7.43199		8.42316		8.23923		6.47997		5.36952		5.6144		6.82545		4.01566
	0.165514		6.89773		7.03868		7.90117		7.75003		4.25986		6.47452		5.97215		8.1116		8.10414		6.09244
	6.31184		7.7719		5.80209		4.4628		6.62776		7.65688		6.89594		7.48306		7.62658		8.5356		6.63554
	6.29565		7.71749		9.73059		5.52915		7.53133		6.99693		6.05854		7.83804		6.61835		8.59004		2.9381
	3.74903		6.10569		7.96219		4.13581		7.40329		7.748		5.94317		7.91548		5.66268		8.64407		4.83834
	3.23357		4.2173		4.22596		6.61677		7.9789		8.24467		4.85686		8.27037		4.2173		7.24596		6.01772
	5.09638		6.51814		8.78941		5.96005		7.82445		7.44311		6.51553		5.85587		6.91369		7.84477		4.55996
	5.93384		6.97841		6.7385		6.86686		4.99782		8.02203		5.64198		5.65858		6.65927		4.16372		7.09942
	4.80991		7.51442		9.71133		6.33093		6.61677		6.67652		6.00616		4.71411		6.808		7.31465		7.16994
	4.33218		5.88746		9.15589		5.3303		8.39955		8.46492		3.91502		7.01299		5.71847		5.1661		7.14977
	8.58873		5.50545		10.4902		6.86747		7.82209		6.74477		7.59652		5.97065		7.33139		6.40482		6.37511
	5.25619		6.04744		7.34558		7.41366		6.97731		7.62916		5.52446		7.86309		5.35847		7.29921		2.73046
	3.64675		6.28801		7.46464		7.27662		7.99435		8.19982		5.8003		4.43521		7.35807		8.76971		5.8354
	3.97218		6.43461		4.39235		7.45921		7.35052		6.75924		7.09845		6.02915		6.48268		8.26127		7.70161
	5.65858		3.10995		7.60654		6.37108		7.28757		8.34709		7.05816		6.6532		8.59813		7.63972		6.97234
	4.31655		6.55576		8.0228		6.9888		7.57737		6.49166		7.90204		5.30131		5.74713		7.43687		4.80509
	3.49772		6.17187		7.64904		7.06069		7.15254		5.92126		7.40795		5.76579		7.45785		7.22083		5.76394
	4.96543		5.45125		5.79852		8.0499		6.73078		7.69814		7.71565		8.00622		5.23127		7.04744		6.78225
	8.42095		6.04185		9.21392		7.69331		7.12444		5.95241		4.11676		7.29961		6.19017		8.24653		6.04744
	5.56368		6.48808		5.92599		6.90898		6.77554		7.302		7.05866		6.67503		8.89629		7.7719		3.8031
	6.34863		9.62638		6.69274		6.04045		7.51314		7.22856		6.79883		4.95301		7.21564		7.37226		5.29245
	6.23046		6.17556		9.00174		6.71373		7.3637		9.02018		6.65244		6.65624		5.51262		7.33294		6.27365
	5.38316		5.99004		5.88254		7.58938		6.49077		0.165514		7.70746		5.62084		7.18212		8.87514		4.52861
	4.1071		7.7209		5.06335		6.9573		7.89415		6.34553		4.73506		5.0855		6.90248		6.57404		5.87594
	7.94268		5.49581		4.93195		7.83757		6.55659		3.05589		6.70438		4.50932		4.38502		5.79852		6.1974
	8.26916		4.20857		9.5317		5.52915		7.43687		6.8216		7.18392		5.57493		6.10569		6.89474		6.3548
	5.27146		5.47872		5.21857		6.68614		7.85466		8.13245		7.48472		5.01363		7.80082		7.96424		6.68466
	5.62084		5.7262		6.96457		7.51507		7.68602		7.91527		5.83021		3.58324		5.79314		8.23705		6.48358
	8.09446		6.84071		5.16946		7.02775		6.7357		7.13059		7.26966		6.00616		7.24005		7.89459		6.02202
	7.26306		6.58957		6.68834		4.9362		6.94827		7.25142		6.33303		6.7378		7.05714		8.17571		7.13906
	4.87954		4.47631		5.97815		7.39789		7.68086		8.09716		4.63142		3.16125		7.09013		8.64251		4.88847
	3.38439		6.39698		7.74647		7.07676		9.53106		7.72768		7.08619		7.98274		6.02059		7.00553		6.52249
	4.51579		6.6215		6.09776		7.64904		3.16125		5.95547		7.01723		-0.527633		5.89399		9.45946		8.00661
	7.07277		6.54224		7.85374		7.51731		7.32985		8.1544		6.41452		5.57269		6.27809		4.98982		7.15162
	8.23031		7.33217		0.858662		5.32169		9.24495		6.85511		7.14652		5.45125		7.23709		7.25975		7.43234
	6.10831		3.91502		7.05765		8.12287		8.00169		6.76742		7.19194		5.73957		6.43082		7.24428		5.99004
	5.66881		5.85756		5.88583		6.76266		6.6215		8.56178		5.81096		7.16265		7.46396		7.82114		7.77066
	7.18571		5.99151		5.04452		4.60227		8.01289		7.16767		7.03141		5.06335		6.73989		7.52848		6.40384
	7.2904		6.78625		7.62255		7.50959		8.08086		7.92577		6.77014		5.94317		6.00033		6.53798		6.36704
	8.34022		7.46159		6.72016		6.14187		7.15254		8.87688		5.99446		6.92361		5.06708		8.67427		7.36966
	4.55996		5.57269		8.67013		7.34673		7.88398		8.095		7.48306		6.02345		6.61993		7.52243		7.76416
	3.36419		5.04071		6.29783		7.42393		7.13248		8.16166		6.88392		7.66022		6.64095		7.55755		5.21537
	4.55377		5.67692		8.76989		8.7938		8.25331		7.26925		6.24887		6.15448		5.22811		7.251		5.818
	5.6144		4.91478		9.18306		6.82031		5.18279		7.51152		6.60805		5.37226		5.63357		8.55692		6.09776
	6.9172		5.14569		6.70221		6.53713		6.49256		8.96811		6.09244		4.70348		6.20577		7.07177		6.56909
	5.71459		4.85226		8.91643		4.60227		7.01139		6.10437		6.32988		6.53969		5.60577		8.00327		7.7513
	8.03816		5.6251		7.55322		7.51249		6.3097		8.37727		4.89732		5.61225		6.27254		6.6262		6.03622
	5.09999		7.47372		5.27449		6.53284		7.90878		8.87951		4.64285		3.08329		6.04325		6.9888		5.61009
	7.45921		6.2117		7.98816		7.23836		5.10358		6.65396		6.58957		5.95394		6.85449		7.87997		7.626
	4.4491		4.4628		6.87177		7.18078		6.96846		6.74129		6.64095		3.4797		6.54733		8.95098		7.10234
	4.9858		6.41742		6.64018		6.80408		7.19239		7.42357		7.04023		4.27639		5.75837		7.23624		4.483
	5.20894		5.09638		6.50234		6.47088		8.54563		7.70507		6.89175		4.20857		5.73767		7.22341		6.01772
	4.89732		6.12781		6.91778		7.23794		7.40616		8.91501		5.66881		7.45444		6.23162		7.26182		3.76283
	5.38587		6.89713		6.42701		7.4707		8.78535		5.29541		7.08025		6.06678		7.16858		5.91172		7.71512
	4.25986		6.6262		5.4563		7.26224		8.04329		6.77823		6.30216		6.8809		5.73767		4.52861		7.72325
	5.32169		6.40384		5.24381		6.84323		6.64633		7.56308		7.74161		5.70285		6.58388		4.04708		7.93785
	4.20857		5.40461		7.82798		6.22464		6.3445		7.92278		6.73359		3.85439		5.19595		8.28327		5.11072
	4.12633		6.09111		6.39993		7.41366		7.74366		7.89062		7.56644		6.29456		6.0263		8.80855		5.80565
	6.201		6.57074		7.75181		8.32575		7.27539		7.78524		5.68497		7.04744		6.99639		3.84182		5.81976
	4.01566		7.24806		8.91873		6.3741		7.3111		8.96231		4.82423		3.5995		5.53149		8.26931		6.79686
	5.48118		7.4204		5.31591		5.94007		7.51763		7.31386		6.9601		5.31301		6.16817		5.61655		6.00324
	5.3303		3.25656		7.70958		7.77364		7.65129		6.79554		6.35788		5.52446		8.72577		3.84182		4.69811
	4.93195		6.83628		6.73919		7.77562		5.50785		7.60566		5.26842		7.36033		8.85632		6.68171		7.42849
	6.06678		6.3393		4.85226		7.95642		7.44587		8.24032		6.89414		6.0334		6.47543		7.9129		6.57569
	3.51542		6.36906		6.46446		6.56161		7.24722		8.57624		5.78592		7.20955		7.89766		8.49046		5.90047
	7.14466		5.3303		5.72812		6.97068		6.84888		8.5664		6.80995		4.87504		7.76191		6.61203		7.18212
	5.45882		5.01754		3.98323		6.96624		7.5977		8.08578		7.27784		7.68249		7.13201		5.90691		7.40545
	5.79673		3.05589		3.67706		7.38039		7.03036		8.0856		6.58876		7.57162		7.0459		7.8308		5.49096
	5.99004		5.73957		6.8576		5.74901		6.9828		7.69169		4.3399		6.06541		7.52784		6.2803		6.73989
	5.62935		7.02565		6.57815		5.46633		3.56671		4.05733		6.25682		5.47625		7.37818		8.62518		6.97455
	8.34877		5.06335		4.59633		6.90011		7.11008		7.68629		5.83712		7.3433		8.20209		7.62802		6.98444
	3.40419		6.41452		4.91045		6.84825		7.66853		7.66272		4.57223		5.30131		5.65858		7.62485		7.36818
	4.06749		5.97666		7.14466		5.36952		8.67649		7.06473		6.9668		4.95716		8.45694		7.77661		6.10305
	5.49581		5.74901		7.8842		5.15934		6.7371		8.11319		6.43745		7.46464		6.04325		7.63289		5.88254
	3.92671		6.06815		8.04481		5.60577		7.44793		7.52848		5.99299		7.56369		8.25622		8.23156		6.90722
	8.02435		6.79157		7.70321		7.0617		7.05917		8.14759		7.34444		8.04367		6.1962		8.52266		4.2173
	4.23454		5.44618		6.9888		7.46091		7.90378		7.40005		6.27809		5.73195		8.30145		7.84777		4.95301
	8.0977		6.60407		9.13098		6.56826		7.4707		6.85574		7.10719		7.32481		7.78989		4.82423		7.2904
	4.85226		6.51378		8.44989		6.64709		7.33101		6.66755		5.69097		6.63244		6.56328		3.85439		6.69128
	5.43079		7.20034		7.6814		6.36196		7.84453		7.78793		7.17718		5.24692		7.30992		6.78492		3.93828
	4.4628		5.25311		8.0164		6.96122		7.64791		8.29969		6.91837		6.5164		6.05578		8.41208		4.35517
	5.61225		5.8003		6.47088		5.78953		7.19681		7.7072		6.88211		9.56738		6.76061		6.88453		4.54127
	5.0018		5.77132		7.8054		6.92245		7.17266		7.27171		7.03297		6.90248		6.8093		8.33244		6.28141
	6.46905		4.85686		7.3899		7.58099		6.82224		6.07496		5.99886		4.46958		6.21525		8.21078		7.88153
	7.64566		6.16569		8.55748		6.92535		8.10271		5.22811		7.13671		4.87053		7.16676		7.83197		7.2713
	3.67706		5.80919		7.07527		6.67949		7.28999		7.16311		5.66881		6.63941		5.74146		8.28238		7.71775
	3.81617		7.96219		8.86428		7.29921		7.42005		8.84133		6.7565		4.11676		8.24869		8.60777		6.57404
	4.08749		6.04045		6.26583		6.6854		6.92593		7.09942		7.31465		6.96066		6.4251		8.28342		7.31582
	5.31881		5.60793		6.41742		7.17628		8.41861		7.37485		6.05854		4.86599		6.06404		5.43337		6.56411
	4.4491		6.84134		7.17085		7.48934		3.99416		5.74524		6.9888		4.84301		7.35355		7.13812		6.40968
	8.18496		6.35685		7.75637		8.28729		6.4543		8.77911		7.34711		5.75089		7.23027		8.3203		6.82031
	3.74903		6.89773		8.97351		7.89876		8.32503		7.16265		6.59362		5.07079		4.28455		7.0612		6.97455
	4.29265		7.21477		4.78063		7.33525		6.97896		6.52682		6.10041		7.19061		6.30216		7.35468		6.25682
	5.99151		6.22347		9.20631		6.57239		8.07243		6.51027		5.38045		4.85226		4.51579		8.87564		5.89886
	5.12486		6.15197		8.98636		7.07925		6.13166		7.52879		7.12158		5.48608		8.53976		8.36608		6.00906
	4.8147		8.42536		8.30714		7.52816		6.18896		8.75149		5.38045		6.12265		8.83457		8.03166		8.12601
	5.15595		7.14698		7.68031		5.80919		8.66861		8.48548		6.80539		6.72796		6.93343		6.63941		4.90171
	7.35544		6.37511		6.31291		7.19814		7.49198		7.36295		5.07079		6.9528		5.84739		7.28353		7.68602
	3.93828		7.03609		5.11072		5.90691		7.28596		7.16402		6.69858		6.36704		7.1946		7.06826		6.2443
	5.0855		6.92128		9.94548		7.3008		6.91662		8.26765		7.51185		6.27365		6.29456		4.36272		7.32675
	6.195		6.40968		5.81976		7.06876		9.48538		8.51995		6.21525		6.39007		4.72986		6.93286		5.4204
	6.03198		7.56552		5.14569		8.20998		6.7385		6.1694		7.36332		7.14233		8.07702		8.09985		5.98708
	8.25745		6.81385		3.58324		5.20571		6.89653		7.91008		6.89175		6.71517		6.84637		7.24175		6.15197
	4.85686		4.27639		8.87192		8.59366		7.373		7.88686		6.74198		7.09942		5.92442		8.69246		5.68297
	5.64823		6.76674		6.90662		5.20247		8.11213		6.95167		6.68392		5.70482		6.65168		6.33303		5.51262
	6.71158		4.96954		5.14569		7.02984		7.58878		8.41991		6.2902		7.56399		4.9191		7.88287		5.8776
	3.78986		5.71847		7.54702		7.37855		7.05051		7.73493		4.1819		6.32883		5.46383		8.54425		6.99369
	4.58435		6.46354		6.6698		7.45239		7.54421		7.39644		6.92303		3.46135		6.41452		8.23814		6.97511
	4.69272		6.10305		6.46905		6.80995		5.59046		7.85191		4.94883		5.41779		6.35069		8.53084		6.99369
	5.13879		6.57404		8.95388		7.56644		6.25342		5.4713		6.946		6.70654		5.97366		7.78057		6.16817
	7.16357		6.39698		5.16946		5.66881		7.41046		6.6262		6.96066		5.50545		7.15023		7.66494		6.98334
	4.00497		6.56992		7.68331		4.04708		7.24048		6.88814		5.97815		5.69494		8.60377		7.49033		6.9573
	5.28351		5.4713		6.77081		7.34139		7.42075		7.58159		7.58159		7.14373		6.02772		7.08173		6.15698
	6.21643		5.47872		4.30068		6.60086		6.48538		7.46091		7.33947		6.64633		5.55001		7.06221		4.63142
	4.83366		6.39304		7.93637		6.34553		7.52594		3.46135		6.45523		4.9613		6.24201		8.22273		6.7385
	3.30101		6.195		8.52617		7.81996		7.08816		4.42819		6.17923		4.90171		7.48405		6.34863		5.1661
	6.2176		5.79314		5.71069		6.51115		6.34863		8.12584		6.201		6.87177		6.09776		7.8701		7.12301
	5.21537		8.68968		8.48157		7.95476		8.45342		8.08396		7.66577		6.79422		7.01458		8.34415		5.3303
	7.61443		7.20474		7.70001		7.0546		6.09643		7.6677		6.12781		6.99097		9.3798		7.4794		6.27476
	5.88419		6.64095		6.00616		7.39716		9.01216		7.06473		6.87543		6.82673		5.63779		7.10234		7.28028
	4.28455		5.64407		7.30359		6.96568		8.17122		7.87572		6.3871		5.12486		7.42075		7.78793		6.78559
	7.99614		6.93516		8.46542		6.84825		7.79792		5.77132		7.36482		7.0847		6.79223		7.70428		4.87504
	4.00497		6.06678		4.89732		7.21694		7.0392		7.06675		5.97815		4.25149		7.58489		6.70582		6.55408
	8.08651		6.80539		4.94464		7.77835		7.89305		5.8776		6.2443		8.75223		7.61994		7.62081		4.94464
	6.43461		7.28028		5.59046		6.97786		8.22289		7.23624		6.55659		4.95301		6.32461		7.38075		3.91502
	5.9037		6.0334		7.68737		5.75837		7.23709		7.31896		5.82674		8.42601		4.36272		8.38834		6.95054
	2.60786		4.75048		8.6507		5.4099		7.76841		6.66605		4.58435		7.36743		6.6638		5.01363		5.81449
	4.03672		5.20247		4.25149		6.78892		7.78032		7.81877		7.56766		6.28581		7.17943		6.08172		5.82151
	3.18594		5.29245		7.86013		3.87909		7.10428		7.55785		7.3899		6.92824		7.54981		5.92126		7.1192
	8.75214		7.88753		6.82865		7.13718		6.66002		8.47211		5.19595		6.90011		7.46497		7.38625		7.63574
	5.56819		5.93384		10.0681		7.71354		7.16494		8.23689		6.08037		5.35569		6.45893		6.72087		3.36419
	5.57044		5.64198		10.2143		3.49772		6.35069		8.11231		6.4617		6.0134		6.45523		4.99383		6.64862
	4.77567		6.59765		9.29806		6.94259		7.00499		8.2605		7.08173		6.71015		7.1713		5.49339		7.37004
	6.24086		4.82895		9.42612		6.35992		7.41508		8.65636		6.72087		6.90248		6.23856		7.51152		6.04884
	3.08329		6.77351		6.9084		8.51677		6.30324		7.59414		6.39894		7.56552		7.22126		-0.527633		7.02565
	6.91662		5.79852		6.64402		7.17357		7.2916		8.67609		5.77499		5.88254		7.31229		7.48869		9.08249
	7.24217		7.44518		5.1661		6.69128		8.5526		8.63813		5.81625		6.68392		6.39205		7.52879		5.85418
	3.91502		6.84323		7.32247		7.10525		8.4442		7.06271		5.4713		7.28677		6.42318		8.26674		7.01033
	3.91502		5.58383		8.34877		6.66078		8.07427		7.83618		7.02827		6.47816		6.94997		6.72158		6.04465
	5.15595		5.85587		8.24946		8.56584		8.48401		7.05968		6.33198		5.67894		5.60142		6.79949		5.9974
	5.12486		7.24386		6.75582		2.90635		6.76334		7.0082		8.3839		7.19504		7.79184		6.58143		7.18392
	6.99531		4.77567		9.56627		5.99593		6.37209		7.5112		6.48628		4.44218		7.16676		8.17836		4.96543
	6.84574		6.77081		7.55415		7.05968		6.19017		8.34905		5.67894		5.515		7.62168		6.29129		6.85325
	6.57733		3.5995		7.73364		6.39304		7.77414		7.68031		5.86428		4.92769		6.56909		7.14466		6.62854
	6.05439		5.11072		6.42605		6.89295		7.21303		6.08441		7.11249		4.29265		2.90635		7.99911		4.9362
	7.06876		4.8929		4.86144		6.00033		7.78695		7.77513		7.03193		5.43079		8.71711		7.32247		3.4797
	5.00576		6.77621		8.57557		6.9207		6.73219		6.78225		6.40384		9.15458		7.91073		7.14698		7.12444
	6.8607		6.79817		7.94205		6.45616		7.49821		8.04063		7.27621		6.90426		6.81967		8.48669		6.77081
	6.10963		5.94471		6.09377		8.00425		6.1444		7.82398		7.60654		4.06749		6.32672		9.02303		6.15448
	6.82545		7.01934		8.75809		2.87356		6.974		7.28999		6.70003		5.81273		6.47816		7.97587		6.35275
	7.38222		6.87299		5.17615		3.93828		7.67868		7.77983		5.49096		6.01484		7.09845		7.12965		6.55827
	5.40461		3.91502		7.80275		5.51737		6.43082		8.38147		7.06876		6.48987		7.80996		8.1657		7.12301
	4.27639		7.30874		7.15347		5.93071		9.68087		8.5585		6.40384		6.91603		6.54987		5.52446		6.93286
	5.33884		6.41452		7.15991		4.79049		7.9279		8.15423		5.93851		6.66455		5.68297		7.89084		3.78986
	5.99593		6.8145		7.70746		7.51217		8.33116		7.153		6.70727		9.03435		5.27449		7.5348		5.96914
	6.26695		5.88746		9.17135		6.54309		6.57487		8.15134		7.01405		6.02202		6.06951		8.31266		4.71939
	5.23127		4.20857		6.15823		7.10719		8.49034		8.14691		5.56819		6.1444		6.723		8.73644		6.56078
	5.77315		6.37812		2.4681		7.11345		6.71086		6.87054		7.69385		5.39929		7.14977		8.59595		7.04693
	6.83501		6.96122		7.18883		6.79024		7.54919		6.75719		6.29456		7.35995		7.50894		7.06976		7.43652
	5.09638		6.31291		7.60154		6.59443		6.48538		8.95753		6.52075		4.79538		7.14186		8.583		6.4543
	6.90603		6.11616		6.16197		5.14569		7.24512		8.38147		6.36501		7.03245		4.9613		7.34635		6.10173
	8.17188		7.13248		6.66755		6.43271		5.91012		8.47544		6.20577		6.62698		6.14945		7.46632		7.13248
	7.6283		6.60885		6.98334		7.05561		7.03245		6.57157		6.08037		5.40461		6.88573		7.41757		6.65091
	6.20219		5.26842		4.49625		7.52211		6.57322		4.24305		6.06129		4.36272		6.33408		7.03971		7.11201
	6.98826		8.18989		9.04575		6.7364		4.31655		7.55939		6.44685		10.6727		6.03763		7.62802		6.52336
	8.25208		7.01458		4.59633		8.12041		6.201		6.13422		6.27587		5.09277		7.56338		8.06597		7.38002
	8.59933		5.09638		5.57269		7.11489		7.98435		8.87696		5.98114		5.39126		6.41742		8.0072		5.07449
	6.74477		5.53848		8.59791		6.56078		8.44597		7.27294		8.00819		1.77495		7.78327		7.33332		5.14225
	4.30068		4.50932		8.36457		7.56918		6.78625		6.59604		6.26359		6.51988		6.86008		8.25346		6.40968
	5.95241		3.46135		9.05365		7.5348		7.45273		7.3213		6.23046		6.38809		6.93974		8.22889		5.21537
	7.56522		7.13953		4.12633		4.72464		8.25852		8.12269		6.96957		4.47631		6.31718		6.61282		6.31077
	7.01617		8.60917		9.3738		7.61035		7.15347		7.30319		4.92341		5.13185		5.93227		8.44774		5.53149
	6.3097		5.825		5.31301		7.22771		7.61152		8.43719		7.45649		4.13581		6.62854		7.34825		7.72638
	6.86747		5.32169		7.10234		6.84134		6.32778		4.06749		7.39861		4.35517		6.78492		9.13429		6.51115
	7.01193		1.95727		7.33602		7.02932		7.01458		6.30863		4.62566		4.42819		5.83712		7.8701		7.66022
	6.91016		9.54145		8.38995		6.98006		6.42796		6.27698		5.71459		2.60786		8.27339		8.52699		7.41828
	4.06749		6.88271		5.44363		8.02377		6.43933		7.61879		6.8607		7.20517		5.92914		8.67094		5.49339
	4.87954		5.74713		5.1661		6.60646		6.51465		7.32208		5.69693		4.79538		5.91172		8.10449		7.72377
	4.90609		4.90171		6.49256		6.60086		7.06574		7.29721		7.22942		6.1974		6.65396		8.89774		5.70874
	3.87909		3.93828		6.07088		7.06976		6.88513		7.87078		7.26265		5.336		4.8147		8.16536		6.81061
	5.0521		5.61655		9.39232		8.81916		7.88708		7.18704		7.00285		6.53027		5.5431		7.41046		7.45444
	5.64407		5.23756		9.12611		7.08322		8.4251		6.32883		5.13879		7.61559		6.34346		7.83781		5.17615
	6.28361		3.99416		3.9497		6.65091		8.17188		7.92171		3.8031		6.13805		7.56918		7.04846		5.73767
	1.55181		6.03904		7.94582		7.38186		8.90104		7.18347		4.98982		5.3501		7.11872		8.2576		7.00499
	4.79049		8.10414		7.91742		6.78892		6.00616		7.31307		6.76334		4.57223		3.77643		9.35983		5.47872
	5.46882		4.04708		4.84765		6.89653		7.41402		7.81948		7.16767		3.93828		7.91073		8.2969		5.62084
	8.53037		7.23283		4.90171		6.40774		7.57192		5.35569		6.67652		4.62566		9.18518		4.3244		6.45058
	4.84301		4.94883		3.81617		5.0292		8.84653		6.3871		5.46383		6.31718		6.35583		7.23411		4.82895
	7.99554		5.86428		9.04164		7.34787		7.96116		7.57162		7.5057		5.06335		7.16813		6.40482		4.84765
	2.73046		6.17923		5.05586		6.65472		8.07794		8.7074		5.64823		4.94464		4.40684		7.49559		6.6942
	6.4203		5.57716		7.29921		7.18927		7.02827		8.33881		6.61203		6.76129		4.61986		7.16128		6.06541
	7.66106		6.19379		6.23394		7.40616		8.68221		7.16585		6.28691		6.49524		6.74198		7.0167		6.45058
	4.4628		6.07496		8.91287		6.74407		6.71086		4.1819		5.04071		6.42796		6.69858		7.06826		5.40461
	8.29011		5.49096		7.69035		5.53848		9.3095		7.32247		7.17266		5.81625		7.3509		7.658		8.18332
	4.37764		6.45523		6.48087		7.32907		7.14326		6.83311		7.01193		7.96568		5.15934		4.17285		6.51027
	5.31591		6.10041		8.3203		6.67354		7.62052		8.79711		6.37712		3.69187		5.33315		3.56671		6.90248
	4.55996		5.77315		5.79314		7.92598		8.01328		6.37209		6.99314		6.33093		7.05866		6.63863		5.43337
	5.75837		5.70285		4.35517		5.31591		7.94247		7.29321		6.41162		7.22298		6.20696		8.75205		8.55737
	7.88952		7.97323		5.4204		7.84823		7.37448		7.32325		7.96445		4.74023		6.93055		8.03472		3.10995
	5.13879		4.9613		5.68698		7.05612		6.37511		8.58884		7.66438		6.90307		6.52249		7.83874		5.83021
	5.96763		6.8119		4.19976		7.04178		6.06541		8.27774		6.47725		4.50932		6.90011		7.87908		7.09405
	8.27939		6.42414		8.25408		9.30511		7.53889		7.46294		7.59057		7.07776		4.93195		7.31504		6.75856
	4.1545		6.92303		3.93828		6.18775		6.58143		6.54224		7.01193		6.195		7.27294		7.86059		6.78892
	5.41254		6.88995		8.62645		5.80387		6.94884		7.04436		6.36196		3.78986		5.65445		7.58849		6.05854
	8.00307		4.71939		5.01363		7.21564		6.39501		6.3054		7.25601		8.51393		7.29841		8.11266		6.58225
	3.5499		7.96629		6.53542		7.41508		9.08811		7.15623		7.0098		5.26842		5.35569		9.00812		6.9528
	4.42113		7.27499		8.87242		7.53575		8.1366		6.81579		5.36125		6.66153		6.88211		6.35378		4.59036
	4.94883		6.98553		6.46446		6.51115		6.60247		7.88464		5.1861		5.73577		5.63779		7.31661		6.64939
	3.99416		6.31077		5.70874		6.24887		7.12206		8.03873		6.98934		6.21995		6.36906		7.88041		7.08914
	5.97666		7.5141		9.42021		7.26801		8.77702		7.40437		5.78773		5.12486		8.02724		6.86255		6.0134
	7.54515		7.20254		7.33409		6.10569		7.09356		6.98389		7.05561		5.3501		6.66304		6.76606		6.54987
	6.32037		7.44138		7.43443		6.98389		7.56705		7.93299		7.2204		4.53496		7.80996		7.93806		5.7565
	8.0284		5.46133		7.18927		6.72655		8.37046		7.64227		6.80735		8.08287		3.81617		7.2643		5.8891
	7.68981		6.46446		6.82353		7.4754		6.37912		5.4204		5.42561		5.48608		8.81741		7.96609		5.57269
	7.91871		6.85822		6.62385		6.5164		8.70867		7.13436		7.23496		8.0282		5.86428		4.30068		6.14693
	5.07079		6.59845		6.34138		5.50785		7.80275		4.27639		7.19814		4.46958		7.25975		3.66202		7.05968
	5.44363		6.21878		5.13533		6.847		7.58908		8.14554		6.9573		5.44618		7.153		8.38659		6.99477
	4.94043		7.4969		7.86013		6.67726		8.14895		7.33871		6.5164		6.44965		5.99299		8.11655		6.92998
	6.36399		6.92767		8.90649		6.9573		7.07676		8.27849		6.97179		6.78492		6.66153		4.60817		6.89235
	1.87026		6.89594		9.90563		7.48239		7.6925		7.91182		7.09894		7.95518		5.74146		6.3548		7.40329
	7.80009		7.0546		4.78557		6.59038		7.86852		4.46958		6.70871		7.30359		6.6532		5.86428		7.59236
	6.90129		7.52179		5.21857		5.89073		6.7647		8.71372		6.83501		5.24692		6.24773		8.17538		6.15573
	6.93286		3.4797		7.98615		7.23539		9.50143		8.69572		6.30108		7.62543		2.41681		8.38914		6.18896
	6.57733		4.28455		5.23756		7.6482		6.50764		6.51115		5.55001		6.72866		7.38112		8.754		6.82031
	2.69124		6.83565		5.12486		7.4126		7.14606		8.77401		6.02772		6.02345		6.04744		5.7565		6.64786
	6.80146		6.98553		8.89297		8.11514		7.97668		8.18759		5.75276		5.24069		7.20474		8.03358		6.41742
	5.15934		5.92442		7.48007		6.92535		6.45058		6.72442		5.84569		5.13879		7.41792		7.36445		7.32364
	6.65015		5.63568		4.13581		7.58938		4.59633		8.685		6.90189		6.44685		8.02416		7.73286		6.45801
	6.27031		6.41838		8.54803		7.17266		7.25892		6.9528		5.62084		5.64823		4.76567		8.55771		5.57716
	6.85884		6.61914		7.1999		7.10767		8.02009		8.34148		7.27212		7.69707		6.47088		7.65073		7.9157
	7.96977		7.14513		7.2204		5.9354		5.23756		6.58306		7.03971		6.30648		6.9828		7.94079		6.85884
	4.67086		6.38511		7.48604		6.9443		7.6688		7.2916		7.01564		5.86428		4.9613		7.02513		6.02915
	4.70348		5.91809		8.7031		6.82353		8.1657		6.99801		6.93055		7.26389		4.87504		8.61998		6.24086
	6.35583		6.46262		7.12918		6.7371		7.70134		7.05917		5.79134		3.84182		6.22697		6.87908		7.54888
	8.18693		7.59296		6.16072		6.78958		5.23442		8.26628		6.54479		5.68897		7.06826		6.59926		7.31935
	3.66202		5.80209		6.97896		7.54265		7.30874		7.45649		5.3303		7.10912		5.27449		6.06678		7.65465
	3.74903		6.83565		5.80742		7.81402		8.08068		8.10217		6.49166		8.27143		7.34673		8.26081		6.15823
	4.70348		4.74023		6.31398		7.44449		9.56821		8.41037		7.86013		5.61009		3.49772		8.31886		7.43722
	8.095		7.15069		6.5337		8.57222		6.6215		7.17763		5.86596		7.95993		5.52915		8.04405		6.64479
	4.43521		5.51024		9.51021		7.20474		7.89832		7.48107		6.85884		6.55324		5.63779		8.28996		6.1962
	4.1819		4.55377		7.71486		6.88694		7.53732		7.98756		7.10864		4.98982		4.4491		8.77693		6.31184
	3.6155		6.64326		8.92863		7.71143		6.79752		3.81617		4.91045		5.85249		8.04025		7.86173		7.48007
	6.35378		7.08964		4.05733		6.47634		7.5348		8.00543		7.35279		6.67428		8.13643		7.77909		4.83834
	5.06708		7.23411		8.1995		7.86875		8.10503		4.51579		6.49256		4.4628		6.22581		8.45241		5.82325
	7.37263		6.04465		4.9613		6.7647		6.38908		5.31591		5.4099		5.71653		7.78695		5.97666		7.72586
	5.45882		6.65091		4.87504		7.5977		6.87908		8.36676		6.59362		5.68096		8.45806		8.21845		5.72427
	6.08441		5.79493		7.66604		6.31184		7.26801		8.20435		5.46133		7.07427		7.2247		8.70974		5.2775
	4.13581		6.67503		9.16303		5.64615		4.73506		7.93087		7.57526		6.21289		3.63125		5.05962		5.20247
	7.72011		5.66881		9.86985		6.74615		8.19348		7.80443		6.52249		6.2223		5.11781		8.49565		6.07902
	4.11676		5.79673		6.08843		5.80565		8.6541		7.88509		6.12006		6.3731		7.38186		6.91954		6.15322
	7.14233		6.59281		6.396		7.05561		7.81806		8.39556		6.07088		4.31655		6.49702		7.31504		7.42146
	4.78557		7.53196		6.9007		6.0263		7.31347		7.47003		6.43933		6.63709		5.3473		3.99416		6.69712
	5.27146		7.46835		6.12135		6.33513		6.86193		6.56244		8.65091		6.82737		2.60786		7.88753		6.02915
	8.3549		7.0098		7.54608		6.47361		7.99256		5.08914		7.24638		6.41452		6.05854		6.58469		6.72796
	5.99886		6.21878		5.25311		6.18896		7.33101		8.44926		7.22427		5.04832		7.54296		5.84909		6.03198
	5.72812		7.15162		6.98771		6.35788		6.56161		8.04101		6.15071		7.37004		6.01915		7.88974		6.49524
	5.78047		6.79488		9.42517		7.12015		7.7357		7.37115		6.06129		7.71011		5.80387		6.53113		4.61403
	4.78063		7.78155		7.2912		4.65975		7.05816		6.3589		6.89713		7.19637		5.5221		8.07611		5.50785
	4.42819		6.71302		8.90976		5.24692		6.82417		7.92021		4.83366		7.10864		6.79817		7.94268		3.86682
	3.05589		6.30108		7.28231		8.11372		6.47361		7.80804		6.03198		7.7781		6.44216		7.87908		8.24374
	8.29395		7.51731		7.07377		4.39962		8.43655		6.38511		4.95301		5.4563		7.1428		8.70613		5.89561
	7.07127		5.94626		6.22347		7.22169		5.0097		6.98444		7.7551		3.89121		6.06129		8.77173		6.45523
	4.09734		3.74903		9.9381		6.44497		7.50082		7.64057		6.20696		6.26695		7.55229		8.30189		6.21995
	5.31301		6.67726		8.31627		7.52625		7.18615		8.48401		6.92767		6.67949		7.75485		7.53417		7.31622
	6.42701		5.73386		5.41517		7.12254		7.08124		7.02932		9.9981		6.73989		7.49657		8.37169		7.12918
	7.42604		5.88746		7.85076		7.42744		5.82674		7.5701		5.2775		5.09277		7.60507		7.5467		6.16445
	5.95241		3.961		8.15338		6.85075		8.08013		8.09302		4.85686		5.29541		6.76674		8.10574		7.373
	7.21953		6.18411		5.6989		6.36298		8.72519		7.91828		5.1661		6.43933		6.32883		8.13695		7.61006
	7.00766		5.44107		8.25085		7.3939		7.65604		8.41522		5.89073		5.825		5.4282		6.89773		5.20571
	2.51689		6.20577		8.51144		6.95505		8.21254		8.18068		6.22581		7.7393		6.95786		7.82351		5.55687
	4.483		6.30755		6.40579		7.35166		7.663		8.70182		6.13294		4.96543		7.65353		7.30676		6.40286
	5.16273		4.83834		4.64852		6.78625		6.26919		7.99892		5.61009		6.2351		6.44965		7.61356		6.70871
	4.86599		5.03305		4.66532		7.26058		7.11681		8.22621		7.04898		4.26816		6.64326		6.51027		6.00179
	4.67637		7.2409		8.2605		7.48902		7.59206		7.53259		7.51635		7.94957		5.29245		7.30834		4.41401
	6.45801		6.57651		8.24125		7.13531		6.64018		4.80509		6.59281		8.36085		7.47238		7.57101		6.43556
	6.2443		6.0047		8.29631		7.56827		7.03453		7.10186		6.71802		5.1861		6.00179		7.8183		5.39395
	4.89732		4.85226		7.94749		7.69465		7.44138		8.34303		5.49581		5.05962		5.88583		6.92651		6.14313
	4.35517		2.41681		5.04832		7.32442		7.13718		7.83688		6.98389		4.49625		4.43521		7.68466		6.39501
	4.52861		4.73506		6.88995		6.65396		8.02782		8.68271		4.67086		5.29837		6.25795		7.47773		7.40329
	6.9294		5.60142		4.58435		6.6698		7.12965		8.09626		5.87262		5.64615		6.83056		8.76364		5.38857
	4.23454		6.49256		5.0855		4.66532		7.27171		5.8891		5.60793		7.54483		8.10021		7.71143		6.68392
	5.77682		5.13879		8.27549		6.03057		6.94827		7.6871		5.91491		5.17281		4.69272		6.37511		6.57815
	5.58383		6.00761		7.77983		6.10305		10.6497		7.97789		5.88583		6.59362		7.58579		7.80009		6.21878
	5.79673		6.21525		9.38233		7.63631		7.88064		7.84661		5.81273		4.61986		7.45102		4.94883		5.97065
	6.27809		6.00906		5.01363		6.16445		8.09698		8.13729		7.0288		5.49581		7.64227		8.39596		4.57831
	5.28948		5.61655		8.36621		6.82609		7.33409		7.74545		6.79223		5.19268		6.19138		8.64625		6.95674
	5.37226		5.54541		7.30398		6.53798		6.43366		6.89235		7.28028		6.76742		7.91203		7.50732		5.90691
	5.08914		7.95061		7.06271		6.12394		7.4867		7.86286		6.94316		6.25001		5.20247		6.52682		7.3592
	8.51571		5.85756		6.90722		6.7364		7.61006		7.7614		5.32169		7.21607		7.70268		8.34737		6.53713
	8.15287		6.45058		5.90047		4.46958		6.02915		8.69008		6.47997		7.21953		5.80742		7.55816		6.46813
	7.42146		5.89236		4.75557		8.08323		6.68245		6.6683		6.0263		5.1661		9.32456		7.64876		6.34863
	4.8147		6.08037		7.61908		6.76742		6.37209		7.94916		7.28191		5.42561		5.98411		7.8013		7.26719
	0.858662		5.21537		4.25149		6.70293		6.47179		6.8809		8.30976		6.33093		6.11224		8.52862		6.13422
	4.42819		7.04126		5.47625		8.24591		6.24545		7.84869		7.08569		6.00324		7.19105		7.10912		6.31612
	8.25821		5.43595		7.52147		6.50676		6.396		6.62464		6.53969		5.53848		7.45068		8.4936		6.68761
	3.05589		4.94883		9.01947		4.63715		6.41645		7.71064		6.35583		6.2176		4.86599		7.59859		7.37411
	8.13746		6.12781		7.39499		8.40458		7.41224		7.11201		6.91251		5.94626		5.28351		8.03816		6.82673
	7.70507		5.26842		8.09176		7.21607		7.84407		8.62593		6.25115		6.63863		6.74198		8.16368		5.98411
	5.48852		5.94317		7.65855		6.44965		6.70727		6.64633		5.82325		6.26583		8.5176		5.49096		4.80024
	1.95727		5.92599		8.03587		8.075		6.69712		6.50852		6.657		6.48448		5.94471		5.01754		5.74146
	5.18939		7.75384		3.30101		7.67649		5.65652		4.42113		8.14776		4.98176		6.66455		7.74468		6.86255
	7.77859		4.98176		8.20837		7.16357		8.31685		8.82125		7.15347		6.5294		5.27449		7.87213		6.41065
	8.23423		6.48808		7.49264		7.85763		7.73544		7.98575		6.92882		5.11427		6.6532		5.4713		7.42779
	4.63142		5.32744		5.3303		7.13342		3.63125		8.13884		6.10041		6.73078		5.91491		7.1713		5.76579
	7.35468		6.3589		9.31148		6.88875		7.4204		7.71249		5.76948		5.15254		6.46813		7.19016		6.45523
	2.36274		5.74336		6.99477		5.818		6.85449		6.31291		6.6698		5.84398		8.59191		7.54202		6.32883
	7.2078		6.45244		4.76063		5.92757		8.12182		7.33101		6.82737		4.76063		4.86599		6.76538		5.98411
	7.46531		6.43177		6.8809		6.54139		6.30755		7.92875		6.35275		6.85449		6.82609		8.29041		7.2178
	3.74903		6.42414		2.30558		3.18594		6.44497		5.68297		6.84197		5.88254		7.4126		8.83027		7.3899
	3.74903		5.60359		10.849		6.21052		9.01768		7.4794		6.45337		7.88708		4.04708		7.08272		7.24175
	7.65129		6.88332		8.68879		7.29441		6.84134		8.14383		6.67354		7.29921		4.08749		7.85351		6.31291
	4.67086		6.71588		7.27253		7.17492		7.97809		7.96198		7.3115		7.1038		6.50852		7.89151		5.89236
	5.38587		5.7841		5.73003		4.56612		10.12		6.97179		7.51507		6.15197		6.57322		7.93193		6.82673
	7.72975		6.26807		7.62543		7.50408		9.97971		8.05778		7.54327		5.957		6.32461		7.51828		6.04185
	4.51579		3.64675		9.54572		6.72655		8.2194		5.64198		6.70365		7.89129		5.89561		6.83628		5.96309
	5.97964		7.08717		8.16653		7.00446		7.64932		8.18134		7.4794		5.58383		6.04744		6.91662		4.61403
	6.18896		7.44931		6.4203		7.28069		6.06541		5.88254		6.79157		7.52911		5.3529		7.17311		6.3476
	8.48291		7.28272		8.14981		7.42393		7.24048		6.43556		7.43861		7.41331		7.18927		8.72193		5.63568
	4.94043		4.43521		6.73219		7.16676		7.60625		8.033		7.50408		4.74023		7.83967		7.2468		6.34346
	7.15485		5.69494		8.53444		6.39993		6.57815		7.01405		6.70365		5.45378		5.21216		6.75856		7.29601
	5.64198		5.70678		7.88841		8.02377		7.02984		9.38907		6.96457		6.43745		8.11266		7.72168		4.03672
	6.73359		6.04465		6.42222		7.5253		6.92651		7.30597		5.77864		7.13201		7.67922		7.25892		5.05962
	6.15823		9.15677		6.2223		7.53038		6.94771		6.7385		5.11427		6.92012		5.94471		8.45543		7.2247
	5.69693		4.11676		8.532		6.47452		7.48472		7.55322		6.92303		5.83021		5.43079		8.00465		5.50785
	7.80612		5.52446		4.54127		7.0459		5.88419		4.42819		6.30863		5.60577		6.57897		7.75611		6.14945
	6.7364		7.82657		6.08709		6.77957		6.40676		7.29401		6.96624		5.98263		9.66107		7.59147		5.515
	2.03732		6.59281		7.95621		7.11824		7.24301		8.89999		6.79554		7.30041		8.2553		5.31591		7.30279
	5.07079		6.46996		7.70826		6.24545		7.27866		8.85211		4.9777		5.97516		6.46078		5.99593		5.44872
	6.01484		4.69272		9.98939		8.19771		7.71959		9.16926		6.80865		4.30865		6.83628		7.34597		6.90426
	3.90318		6.54733		4.1071		9.37715		5.11072		7.97079		5.72234		5.17948		7.59296		7.16676		5.95088
	7.15254		6.6668		6.78692		6.95674		8.05009		8.56662		6.96791		5.60359		5.65031		7.07527		5.14225
	5.05962		5.02533		8.53895		7.49231		8.29321		8.50966		6.99747		7.96813		6.46538		7.35279		5.74713
	5.99299		6.72371		6.94202		6.78958		7.52974		6.97676		4.28455		3.78986		8.76549		7.46464		7.01723
	3.84182		5.72234		6.44591		6.69566		7.83056		7.57586		6.12909		5.74524		6.93055		8.81066		4.33218
	6.93745		6.657		7.2178		5.76023		6.54818		6.2176		6.53027		5.57269		4.79049		6.52854		6.51988
	8.54975		5.62935		6.63399		6.61756		6.63088		8.55237		6.2351		5.8003		8.42147		7.85489		7.28434
	4.88401		6.82481		7.08074		6.24545		6.76129		7.07875		4.8929		5.1661		6.43082		7.6688		6.52249
	4.34756		7.42498		4.26816		7.9454		7.41402		6.2803		6.69712		8.30554		7.07377		8.07739		4.91478
	6.49791		5.96763		8.40405		8.21078		6.68761		8.80722		7.61181		7.41295		8.16133		9.04311		6.7385
	7.23581		6.26021		5.42561		4.83366		7.49854		7.90378		7.45989		7.5834		7.4541		8.44216		3.961
	6.71015		7.11393		7.62312		4.71939		6.84134		7.06826		6.54902		5.67288		8.7912		6.09377		7.70773
	5.54541		3.13593		4.87504		7.64594		5.76579		6.23278		7.18168		4.72464		8.04575		7.61064		6.88392
	6.40286		5.43595		3.77643		6.8576		7.27784		7.46767		6.32037		5.49823		6.60885		7.26306		6.54818
	5.65238		8.15541		7.68113		7.55229		6.94827		8.71178		8.02396		4.42819		8.4282		7.09552		7.76366
	5.43079		7.90792		8.8262		6.31718		7.10331		3.27903		7.0459		6.55239		6.61282		7.19504		6.46722
	5.39929		7.41686		9.89518		7.04795		8.227		5.76948		6.72513		7.69974		6.98061		6.76402		5.12486
	5.71264		6.3861		3.56671		6.84888		7.22427		6.92651		7.98394		6.96345		7.18212		7.46464		5.35569
	6.36906		4.08749		3.32251		7.28313		7.54702		7.9172		5.70678		5.32744		6.9729		6.32883		6.94145
	4.11676		6.64326		7.7146		6.62776		6.75719		7.17763		7.50278		5.50545		4.71939		8.47531		6.23971
	5.33884		7.34292		7.08964		7.64312		7.59087		7.59087		7.46193		6.55994		6.95392		4.46958		4.57223
	5.07817		4.69272		7.04846		7.38296		5.99446		7.38735		7.92896		4.06749		7.30795		7.07627		5.36401
	4.78557		4.76063		8.36759		5.57044		7.35694		8.25622		6.93458		5.00576		5.30131		7.60184		7.64255
	7.10137		5.40196		7.90029		5.87262		6.79949		6.04465		6.12652		6.35685		7.41792		5.8693		5.5431
	8.26294		5.05586		4.46958		8.32016		7.22298		7.08025		5.79673		4.35517		8.13919		5.66881		6.34657
	4.52222		5.97366		7.69948		5.17948		7.62974		7.15208		6.35788		5.6187		6.9511		7.11105		7.14373
	7.05714		6.17064		8.33116		7.66632		7.10137		8.01015		4.82895		7.57858		5.50785		3.32251		6.4617
	4.11676		6.7789		6.84197		6.29674		7.15761		7.78671		6.98989		6.76061		5.52915		8.06058		6.76198
	4.09734		6.85884		4.65975		7.75662		8.2553		6.86747		6.6144		6.23625		7.1704		8.08159		7.43164
	4.51579		5.9974		7.07577		7.46868		7.29401		8.14348		4.50932		5.88254		6.04605		8.17038		6.20577
	4.59633		6.74754		10.2629		7.62139		7.84176		8.80484		5.67894		7.94686		6.2902		6.34863		5.99299
	7.12063		7.51699		9.74334		7.76216		7.07826		7.93616		10.8513		7.36929		7.98415		7.89591		4.69811
	4.04708		3.30101		5.25619		7.19681		7.30992		7.98796		6.93688		5.75276		6.97841		9.30581		6.97731
	6.06541		7.13859		7.54795		6.28471		7.10186		7.68113		6.00033		6.25682		6.62542		8.37101		6.34138
	5.77132		5.85587		3.92671		6.7378		7.45683		7.38479		7.40688		6.88392		4.50932		7.96034		7.39499
	6.0334		7.40867		4.1819		6.3054		6.62698		6.96457		5.89236		7.81187		6.09377		6.3731		5.36125
	5.85249		5.45882		4.84765		8.36717		6.79422		8.55112		8.33002		6.69347		4.17285		7.55137		7.17176
	5.01363		5.84569		5.12134		8.095		7.81925		3.92671		4.99782		4.05733		7.90204		6.27031		8.43296
	5.6187		5.98263		4.46958		7.10137		8.3203		4.88401		4.9613		5.67692		6.28691		7.04846		6.79422
	6.29674		7.43199		8.45706		7.90029		7.10864		8.41548		6.46262		4.9777		6.99801		4.91045		7.04075
	6.3741		7.87213		7.05307		5.50785		6.6942		6.7385		6.53798		3.25656		6.73289		9.00725		5.79673
	5.19268		6.59038		9.59912		7.13342		6.2803		7.77439		5.41517		7.23283		8.49674		7.15669		6.29783
	6.89474		6.08306		7.81521		7.20517		7.60654		6.13038		6.28141		6.85698		7.02775		7.5704		6.35583
	4.22596		6.48808		6.22581		6.76198		7.24343		5.07449		7.42181		6.47725		6.45893		6.96846		7.1414
	6.35172		6.67279		5.8809		7.20166		7.15485		5.51974		7.17808		5.28051		4.07754		7.47104		7.23027
	5.05962		6.47725		8.58045		6.22464		7.12918		7.46936		6.32037		8.97627		6.8008		6.96735		7.91957
	4.50932		6.95674		7.52339		7.5846		7.04384		7.96629		8.09698		6.1355		6.03198		7.61356		8.70642
	4.99383		6.86131		3.90318		6.57157		8.03204		9.0292		7.373		5.60142		6.6215		8.71634		5.84739
	4.50281		7.76341		9.20613		6.09776		6.14819		7.83408		7.15208		5.90852		5.12134		8.14674		6.9828
	7.86649		6.89951		6.03198		6.75513		7.41473		3.4797		7.2021		5.47872		4.57223		7.22813		6.39403
	7.52974		6.82417		6.20696		7.20824		6.9817		8.25469		8.40034		4.82895		4.58435		6.60486		3.44266
	4.86144		6.73919		8.61678		7.84938		6.83501		6.40579		5.35569		4.22596		6.02915		8.34541		4.39235
	4.1452		6.45058		6.39698		7.15899		6.34657		7.86286		6.06678		5.67085		6.74477		7.89635		6.1998
	4.31655		6.46722		4.11676		4.80509		6.68171		7.41969		6.77554		6.66455		8.83646		8.582		6.57404
	5.16946		5.48608		5.93227		7.2758		7.12776		7.84777		6.47725		5.46633		9.16198		6.55659		7.98595
	6.35992		6.08843		5.11427		7.57101		7.59177		5.4204		5.92599		5.84398		6.946		6.73429		6.95392
	5.53615		6.08037		7.69438		5.0018		7.03557		7.17988		5.74713		3.13593		6.06815		8.33116		6.48538
	7.00177		7.15761		5.5221		6.08441		6.53883		8.57111		6.38012		5.71069		7.37633		7.59474		3.93828
	6.63244		5.3303		6.42605		5.78229		5.67894		6.79554		4.45597		4.38502		7.42674		8.27759		7.70321
	8.02261		6.2792		6.47543		4.95301		4.40684		7.31739		6.03198		5.63988		7.66438		7.65409		6.56078
	3.23357		6.25795		6.26807		6.18045		7.21347		6.99152		6.52509		5.60577		6.67354		8.03644		6.4365
	4.69811		5.93851		4.27639		6.47361		7.95414		8.55077		4.30068		7.62687		7.33294		8.08814		3.67706
	7.06423		7.30716		6.79091		6.2891		8.81286		7.09747		7.54702		5.09277		5.93851		7.94624		1.26413
	4.49625		5.825		5.90209		6.87299		7.90683		7.98193		7.56246		6.49524		8.54448		7.58579		5.33884
	7.70428		6.08441		5.19595		6.90898		6.6854		8.49094		6.78425		4.57223		6.60885		8.33116		6.48718
	4.36272		6.53798		5.82847		7.11537		7.1038		7.64679		5.42561		6.90367		5.9354		7.864		7.04229
	6.78692		6.86932		4.80024		6.20933		7.75358		7.91052		6.85822		6.7385		4.84765		8.13123		5.85587
	9.05771		5.75837		5.515		7.13531		6.16197		7.28313		7.65549		7.57948		6.50057		8.0353		6.36094
	7.13201		6.7357		4.95716		5.75276		6.7364		8.06541		5.5221		6.10305		6.43745		5.17281		7.6083
	5.30425		6.3731		6.0263		7.09503		7.34749		7.9558		6.77419		5.13533		7.54359		8.08159		4.35517
	4.22596		6.1406		8.84687		7.04641		8.22732		9.00341		5.20247		6.36501		7.84268		8.28432		4.00497
	4.04708		5.77315		4.97363		5.12486		10.1406		8.81566		5.8776		6.80277		7.60889		3.97218		6.6668
	4.57831		6.0134		5.0521		5.67085		3.78986		6.05301		6.75513		4.59633		7.49592		7.09062		6.27254
	6.64095		6.3731		7.2409		7.94498		7.05154		7.65213		6.94827		6.8495		6.72087		8.19021		6.42605
	4.51579		4.25149		9.93527		6.93573		7.80227		8.47248		6.64939		6.89474		7.71644		7.41188		3.9497
	4.04708		6.80735		7.37263		7.2447		7.01193		4.483		7.09356		5.29837		5.74336		5.06708		7.93848
	4.76063		6.60327		5.90047		8.49203		6.75582		8.85447		5.04832		6.51814		4.38502		7.91073		7.11105
	7.18749		4.55996		5.94626		5.95088		7.61937		8.83809		3.84182		8.62973		7.58039		7.57404		4.39235
	5.14912		7.41331		9.43657		6.42986		7.74392		7.2489		5.61009		4.17285		6.11224		9.32061		5.04452
	1.08181		3.91502		5.13185		6.36196		8.39329		6.10963		7.50473		6.27031		6.44778		8.60074		6.06129
	7.73389		7.79719		7.78695		8.09049		7.23113		7.94811		4.87053		8.54068		7.24259		6.73148		5.75837
	4.57223		7.35995		8.42678		6.45708		6.75856		7.85968		7.08816		5.56819		8.50406		7.66604		6.50852
	6.1986		6.61282		4.71411		4.88847		6.6683		3.84182		4.91045		3.93828		5.64407		7.28717		7.37004
	4.91478		6.95392		9.30388		6.40968		6.46078		6.195		6.68319		9.06381		3.25656		7.81568		5.43851
	3.02772		6.79949		7.97648		7.20561		6.9007		7.79719		6.6698		8.19885		7.13012		8.39396		7.38516
	6.02059		5.92757		9.39551		6.60086		8.04082		7.99375		6.63088		5.17281		6.19138		4.85686		6.38908
	6.21643		7.38735		6.99693		7.28555		5.95394		7.80468		5.53382		4.9191		3.98323		5.0097		5.21857
	7.40149		6.79223		4.72986		7.59355		7.33986		8.0005		7.52466		7.2021		8.78119		8.10965		7.25601
	4.50281		5.70678		6.08575		5.74713		6.9007		7.15715		6.30432		6.25456		6.97621		8.36236		6.41549
	1.95727		6.01051		8.14964		5.89561		7.30636		7.63346		7.03245		7.4764		3.6155		5.13879		7.00231
	7.47606		8.52816		8.1544		7.58249		7.46023		7.68249		5.336		5.79314		8.36841		7.13201		6.11355
	7.70614		4.20857		6.06678		8.02319		7.05256		7.81663		7.3899		7.22169		9.32309		8.32303		6.41162
	4.72464		5.69097		7.53952		6.46078		7.91225		9.50798		7.07875		5.77864		7.81901		7.43965		7.75611
	1.77495		5.3303		5.33884		6.61519		7.18392		7.97648		6.51378		5.14912		6.55155		9.47362		6.1974
	5.74901		6.9888		8.20499		7.61327		8.14194		7.88064		6.45151		4.13581		6.04605		8.59671		7.77835
	4.86599		6.89653		6.0334		6.57157		7.66438		7.00606		4.19087		5.78773		7.0459		5.78047		6.85138
	5.39929		6.04185		7.67266		5.50065		7.37781		8.27624		7.29401		5.38587		6.89832		4.59633		6.91369
	6.03481		6.4009		7.1946		7.31543		6.87968		8.0546		7.47003		5.53382		7.9332		8.33655		7.07826
	4.48965		5.85587		6.70943		6.36805		8.15711		7.57888		7.22985		5.60793		4.61403		7.97971		4.78557
	4.83834		6.44591		6.55659		6.12394		6.36602		7.88797		6.657		4.51579		6.17064		7.39897		4.75048
	3.23357		5.91491		8.74427		7.57526		7.98876		7.84338		6.28691		4.45597		5.80209		8.69493		4.84765
	5.04832		6.4663		6.6262		7.51314		8.08904		8.43129		7.22341		6.59765		6.38511		4.64285		6.71015
	5.97666		5.68698		6.16445		7.85671		7.79743		4.42819		3.90318		5.83884		5.56594		8.98096		6.14567
	3.99416		5.19595		5.48363		7.37855		9.26855		4.63715		7.12063		6.01051		8.49975		9.17508		6.11224
	7.73905		7.09942		5.20247		7.26925		8.20564		8.29778		6.808		6.48987		5.83367		8.0074		6.94827
	3.67706		6.57487		5.64407		5.54541		7.65044		3.8031		7.67977		6.3097		9.48932		8.05066		9.04192
	6.74615		6.50057		8.56931		6.79949		7.95683		7.55291		4.67637		6.26134		6.01484		8.31353		7.36855
	3.90318		6.29674		7.73286		6.45151		7.80419		8.73625		6.35788		6.39698		3.6155		8.22747		6.35788
	8.07225		6.3476		9.06783		6.12394		8.00228		7.77958		6.56577		6.05023		3.82908		7.94853		6.87543
	4.9362		5.09638		7.64085		7.33832		8.95457		6.57815		5.54541		5.14912		7.25559		7.64988		6.37912
	5.818		5.3529		4.52222		6.91662		7.50017		8.0546		6.9926		4.80024		6.65015		7.51475		7.11824
	6.47906		8.27909		4.67086		7.46497		7.49428		8.53757		7.09258		6.28251		5.94162		8.18578		5.6989
	3.10995		4.83366		8.40853		7.7513		7.14652		7.85991		7.06372		6.0047		7.01033		8.83251		7.81663
	4.26816		5.46133		8.41182		6.75031		7.15853		6.63786		6.64633		6.25795		7.48007		6.97345		7.66549
	5.49823		5.92914		1.87026		7.46091		8.22147		7.72142		6.91427		5.84227		1.55181		5.03689		8.24992
	7.90182		6.72158		8.57312		6.76266		7.81663		8.25943		6.02059		8.37971		6.18775		7.89985		7.83804
	7.23539		5.51974		3.56671		6.81061		8.75428		7.47104		5.76763		7.00231		5.67288		7.16174		6.93859
	7.77488		5.67085		4.96543		7.33294		4.00497		6.60086		6.90662		6.16197		7.02198		7.87594		4.16372
	4.78557		5.04832		8.27549		6.89534		7.07527		6.85013		6.396		5.75089		7.86332		7.4794		6.59604
	5.66677		6.61282		8.02261		4.50281		7.86649		2.83966		7.11345		6.84574		7.26182		7.80203		4.9613
	8.4684		5.8891		6.56743		7.63174		6.38312		8.85884		7.23539		4.19976		9.20103		7.7984		6.76538
	6.08575		8.04877		5.79134		6.61361		7.76742		7.13389		7.05917		4.59633		7.14884		8.711		5.74901
	7.61618		5.04071		8.07169		5.67894		7.31896		4.46958		7.06625		8.09121		5.0521		7.79257		6.25342
	6.56992		6.79289		9.0347		6.22113		7.92449		8.30013		6.84449		6.71015		5.83194		8.38632		6.78958
	4.08749		5.01754		7.55508		6.73148		7.41508		6.37108		6.30863		9.27172		6.82481		8.19852		6.62776
	5.86596		6.74754		6.81838		6.69128		8.33216		7.21347		7.16903		7.23454		8.31829		7.96465		6.27254
	6.56411		5.98411		9.38109		6.35275		7.58279		7.24848		6.99206		5.71847		6.44778		7.30676		5.79134
	8.30772		6.00616		8.93564		7.1192		10.3451		4.56612		6.11094		5.15934		6.13678		8.21813		5.32169
	4.3399		7.21216		5.60793		7.56461		6.12006		7.47372		7.02984		4.54127		6.70438		4.34756		6.93974
	5.50545		5.86093		6.28141		7.21564		7.41792		7.60976		7.7614		4.73506		5.71459		8.20209		7.0459
	5.1861		6.91427		8.33031		8.61496		6.42605		7.68819		5.37773		7.74851		7.59504		8.45744		4.78557
	8.34036		6.01772		8.73274		6.6713		5.7262		7.15945		4.36272		7.2489		4.29265		6.55827		8.547
	6.23971		7.28555		5.01363		7.57888		6.50764		8.16385		5.23442		3.82908		7.25642		7.46734		7.82516
	6.71874		5.84227		6.17801		4.48965		7.43861		7.12206		3.90318		7.33794		6.53027		8.16988		7.52339
	8.17388		5.83194		6.9363		6.60486		8.35434		5.57939		7.66106		7.40293		7.67266		7.12158		7.20122
	8.28878		6.79422		4.30068		5.30718		7.36892		8.00995		6.06404		5.2865		7.25476		7.8261		4.91045
	5.51024		4.63142		8.75874		7.0392		6.84825		7.33756		7.18972		5.28351		5.79673		7.63602		3.16125
	6.12523		5.07817		10.0423		8.52007		7.40329		2.30558		7.33023		7.26016		7.15023		8.30218		6.13166
	5.30425		4.13581		8.16116		6.41162		7.56461		6.52768		7.37596		4.35517		7.91591		5.75089		5.94471
	4.03672		6.99423		5.94471		7.30913		8.19087		7.92064		5.81273		5.28948		8.03854		5.97964		6.3393
	6.47634		3.90318		6.49791		6.76538		7.63117		7.62226		7.28717		6.00906		7.61821		7.05968		6.05162
	6.55743		5.90047		7.31032		5.57044		7.73079		7.18615		6.3731		6.68908		6.72087		6.22814		7.05663
	2.51689		6.90544		4.85686		6.14313		10.2171		8.03644		6.95223		6.83691		7.38917		8.29896		6.59119
	5.39126		6.01051		9.38372		8.11831		6.96122		8.08214		5.39929		6.03481		6.69858		5.97666		7.39063
	7.2126		4.00497		8.0923		3.36419		6.72866		8.54218		7.01723		6.94884		5.92442		6.04884		4.45597
	4.75048		6.49879		7.28838		6.678		8.15236		8.33669		6.54309		5.49823		5.07449		8.45844		5.82325
	5.59266		5.9354		6.64095		6.89115		6.26695		8.39142		6.68687		5.20894		6.47725		8.13071		6.58876
	4.29265		6.95392		6.92187		4.85226		7.13859		7.29241		4.86144		8.04858		7.57223		4.84301		4.72986
	3.72086		5.61655		8.86894		9.21715		6.98115		8.22099		6.12909		7.57858		7.39427		7.66244		7.12349
	3.18594		5.99593		7.04436		8.1925		6.61044		8.14844		7.09942		4.71939		4.64285		8.92738		6.58551
	6.60726		6.10963		4.31655		4.13581		8.45241		7.96547		7.77785		7.86626		5.83021		7.75232		6.36298
	7.20998		7.27417		9.57602		5.72812		6.4251		7.77859		4.28455		5.76208		8.29262		8.30495		5.30131
	5.66063		6.98389		7.72664		5.8354		6.76606		7.88863		6.18654		5.11427		6.87604		7.34139		6.89295
	6.6698		7.09942		7.16767		6.93286		7.12681		7.40365		6.01628		5.62723		6.29891		8.52523		7.01881
	1.87026		6.99639		5.56368		7.64284		6.61123		8.05347		4.53496		7.49592		7.5704		8.07958		7.24974
	7.32985		5.14912		7.32247		6.92245		6.7123		6.2792		6.12394		6.48087		6.51727		6.70727		6.94544
	3.27903		7.07027		6.31505		7.73673		8.49963		9.35381		6.45523		7.36966		5.8776		7.9064		6.68097
	5.81976		5.06335		10.4515		6.57651		7.06976		5.89724		6.8426		4.67086		6.43461		3.40419		7.23113
	3.05589		5.95853		4.11676		6.63244		6.49613		4.25986		7.35506		5.03689		6.8815		6.73359		8.66026
	5.9856		4.55377		5.75276		6.3741		7.28069		8.49009		5.34166		7.01723		8.09931		7.61327		6.10963
	4.43521		5.30718		7.67594		7.75687		8.99335		8.67013		4.82423		9.20767		6.99152		8.0977		6.83247
	2.87356		8.20257		7.10477		7.51442		8.03721		7.45751		6.98608		2.99873		6.66905		3.89121		7.10525
	4.67637		6.66153		4.70348		4.6873		7.1414		8.00188		5.04071		5.4282		8.77154		7.94331		6.64018
	5.8354		6.82801		10.5165		7.23539		6.52595		7.82939		6.68466		6.85325		7.26925		8.6852		5.74336
	4.48965		5.5523		5.41779		4.72986		5.84055		8.26476		6.16693		6.31505		5.77132		4.73506		6.60646
	5.60359		4.20857		4.57831		7.54795		6.99693		7.22599		6.7378		3.53281		6.28251		7.15991		6.32249
	2.56341		6.23394		3.08329		7.77637		7.14419		6.25229		7.22685		6.08172		7.19637		7.45034		7.98032
	4.03672		6.24887		6.99369		6.09643		7.09552		6.91075		5.80387		9.67522		5.72427		6.62932		5.67288
	3.82908		7.58878		1.55181		7.55384		7.75054		8.06355		6.57322		6.20577		6.4251		8.33414		6.12006
	5.0292		6.79356		7.19239		7.03193		7.13577		5.51737		6.25342		5.66473		7.01987		7.1704		7.05051
	5.3473		6.05023		10.217		7.27825		6.1998		6.49077		7.11057		6.47725		6.52336		8.05703		6.71874
	7.26678		6.66304		9.25504		6.30755		8.41744		7.63488		6.7681		5.84909		6.50411		5.97366		3.46135
	6.6698		4.2173		3.77643		6.86809		7.9129		7.5202		6.86193		5.14225		8.85228		7.45478		6.63321
	7.96281		6.20339		9.36429		6.48087		8.67357		8.27293		7.25309		3.23357		6.50676		8.47814		6.808
	7.05714		6.68023		6.9443		5.79673		4.65415		8.2143		6.78158		6.77554		5.70285		7.89964		5.68897
	5.57493		6.16445		5.01363		7.0965		7.73905		7.1096		4.70348		6.82095		6.45986		6.44778		6.94827
	4.6873		4.13581		7.38075		6.13932		7.32247		8.37046		7.00553		6.86993		5.19595		7.01405		7.88841
	4.48965		8.70212		8.76512		5.49096		7.27171		7.64029		6.06541		4.40684		6.37108		8.42743		7.43861
	4.99782		8.26522		8.49046		6.32037		6.3871		6.83565		6.56743		5.44363		8.11514		8.53247		6.78559
	3.46135		4.3244		8.02145		7.46666		8.01308		8.50692		6.86255		5.336		6.00906		7.02303		6.17678
	7.82209		6.65244		8.91707		6.8815		6.83691		7.46159		6.3548		6.93802		8.73653		8.28803		4.63142
	4.86144		5.25002		7.13953		6.75719		7.65549		9.36145		5.73003		5.17615		6.94259		7.41757		7.42075
	3.84182		5.40726		5.28051		7.47573		7.41153		6.82095		5.19268		6.08575		4.03672		7.75712		6.51988
	8.47125		5.77315		8.55487		7.08025		5.16946		6.99423		6.08843		6.78892		5.18279		7.34292		7.2152
	4.79538		5.38587		6.79554		6.47361		7.50408		8.19103		6.88694		5.10358		7.84222		7.70746		5.76579
	5.65652		7.07975		6.54818		5.84055		8.48206		8.17521		6.4365		6.56411		4.95716		8.46206		6.84197
	5.11427		6.20815		10.1498		7.05612		7.4165		8.73016		6.7123		7.15715		6.72584		7.58849		7.17763
	4.33218		6.56494		9.26336		5.76763		6.56244		8.15575		7.4764		1.95727		5.97065		6.59765		6.87543
	7.28677		7.03349		8.05516		6.37511		6.72371		8.63572		3.90318		5.3473		6.15948		7.34711		7.27253
	5.39929		5.97215		6.83565		7.37189		6.76334		7.84106		6.24659		4.54127		6.02059		7.33717		6.45337
	5.69296		6.76402		8.79138		4.92769		7.37633		5.5221		6.84888		6.05716		7.55075		8.08596		7.09796
	8.49348		7.37041		6.58632		7.11057		7.39063		7.0847		6.52075		7.58908		6.98934		5.6144		6.54987
	3.90318		4.40684		10.4962		6.68614		7.03712		8.01698		8.30685		7.32325		4.57223		7.32752		5.82325
	5.38857		5.336		10.0496		6.56909		6.98334		8.3154		6.67055		4.52861		6.80995		7.8842		6.3476
	4.82895		5.03305		5.94626		7.95807		7.42884		6.82417		6.46262		3.91502		8.62836		7.33947		7.31817
	6.58306		5.96157		6.17923		6.45523		7.42569		7.29361		3.08329		6.0334		6.88573		7.07726		4.55996
	4.16372		5.78953		7.05		6.13294		7.28231		7.70001		6.33198		8.1176		7.22556		8.02763		6.72725
	4.3399		5.8891		8.69206		7.08767		7.51731		8.46031		7.45308		6.31077		8.23517		6.26134		6.38312
	5.95088		5.40461		8.35698		7.00392		7.13718		6.83501		6.26359		6.35378		6.35992		7.8443		5.8809
	3.56671		6.24086		8.60852		6.90367		7.16128		7.94644		9.02948		3.8031		4.84301		7.62052		6.47997
	5.8354		4.94464		8.48413		5.05586		7.48206		6.70799		5.88419		4.50932		4.67637		8.01562		6.17064
	4.1071		4.05733		9.07812		6.62776		7.19814		7.22771		6.10305		5.0292		8.63928		7.88731		6.25456
	6.28361		7.38406		6.52509		7.02565		5.21216		7.86059		5.04832		6.3097		4.9613		7.55939		4.86144
	7.53637		6.07767		6.15322		7.90965		7.78818		7.66963		5.38045		5.33884		5.818		8.22463		7.80395
	3.87909		3.93828		8.6798		7.13059		7.20474		7.54234		5.12486		7.17537		8.34793		7.22685		5.39662
	7.00713		6.25569		7.12965		7.03141		8.11707		7.4707		7.68276		4.72464		8.35822		7.91978		7.09454
	5.56368		3.51542		10.1019		7.23283		7.9332		8.70192		5.69693		3.82908		6.36906		7.67375		7.317
	3.77643		7.22985		6.37007		7.21607		7.6326		7.40185		6.21878		8.28996		7.87258		7.64566		6.396
	3.90318		6.60166		7.37965		7.19593		4.483		7.04023		7.42954		5.47378		6.73919		5.45125		7.23921
	5.98263		6.34863		5.63357		5.70088		7.41757		6.79817		5.91967		6.8093		4.8929		7.87505		6.40871
	4.39235		6.68023		6.08709		6.03057		7.75637		8.20757		6.9172		5.66677		7.36706		7.79985		5.87262
	4.25149		4.9777		6.2902		7.17673		6.86317		6.58469		2.24496		7.5557		7.43548		7.3622		3.27903
	4.94883		5.82674		6.4365		6.7364		9.46455		8.05103		6.74823		4.12633		5.56368		7.21694		6.47543
	4.30068		6.31718		7.47037		6.65091		7.99793		7.49494		7.56093		4.61986		6.82031		5.31881		6.14945
	4.65975		6.14313		5.96612		6.51378		6.92593		7.04538		7.18481		5.35847		7.3364		6.70438		6.13932
	7.85603		6.49524		7.99951		7.80227		3.27903		7.89569		5.92442		7.16174		5.54541		8.10539		7.02408
	4.39235		7.74366		7.37448		7.49395		7.35468		8.27759		6.29565		6.50939		7.27947		6.86501		6.21407
	4.1071		5.81625		5.68297		6.63321		7.57888		7.29361		6.26021		8.23564		6.86193		8.51393		7.26925
	3.9497		7.19814		8.68779		6.82673		4.9777		7.7609		7.18436		6.97068		4.08749		7.40688		8.08596
	3.99416		7.13812		4.70881		5.42301		6.12781		7.43583		7.62744		5.38857		7.75485		5.36952		6.37712
	5.56141		4.76567		6.87421		6.17064		7.46936		7.40257		7.51314		6.31825		3.10995		7.44896		6.92651
	5.00576		6.81255		6.4431		8.11054		6.14693		7.84915		7.49756		5.49581		6.80995		6.79356		7.18972
	6.60965		4.50932		9.19109		6.32672		7.39897		8.64749		5.42301		6.12652		6.07631		6.11876		4.1071
	3.42361		7.79792		7.89569		6.85884		7.86536		7.05663		6.56992		6.19259		7.15116		7.62341		7.33178
	5.515		6.42701		5.53615		5.70874		6.49434		8.1366		6.08306		6.28691		3.82908		8.74324		5.92126
	6.60086		5.6989		9.44897		6.11746		7.40688		8.59541		5.17615		5.95394		5.54771		7.66632		4.28455
	4.34756		8.33853		5.11781		6.68614		6.61044		8.18907		4.59633		8.08068		5.66881		7.51217		5.07079
	5.37226		5.4204		6.85138		5.89236		7.05358		8.01034		7.11633		5.67692		7.17583		6.09643		6.37007
	5.10358		5.84227		8.75791		7.23963		6.92361		7.45102		6.04744		4.45597		4.20857		7.73725		7.1663
	5.87262		8.40577		4.92769		6.47452		6.10831		4.43521		5.77132		4.80024		6.56244		7.36743		5.36952
	3.85439		6.12781		9.29795		6.1444		6.56411		8.19185		6.76878		6.34346		8.42238		8.46131		6.61044
	5.73003		6.50852		7.53417		7.23878		7.41757		8.16704		6.7565		4.75557		5.11072		8.6508		6.82545
	8.02028		3.30101		5.21857		5.62935		7.53133		7.28069		7.153		4.88847		5.57939		8.60647		7.47037
	6.96122		7.28069		7.31425		6.91545		7.40077		7.36108		6.74059		5.78592		6.64709		7.22255		5.95547
	2.87356		6.26807		8.15711		6.15322		6.6638		7.65437		6.57733		4.71411		6.14313		7.6743		5.63988
	3.73505		6.06404		5.7565		7.5557		7.78867		8.17238		7.19681		6.87725		7.91957		7.6326		3.05589
	4.2173		6.41742		6.30108		6.68023		7.10767		8.12182		4.94464		6.55408		6.92709		6.08037		5.31301
	4.44218		6.16693		6.62854		6.08575		6.6854		7.0392		5.87428		4.87954		7.63231		8.30947		4.56612
	4.99782		6.60486		8.10983		6.72866		7.1977		4.19976		5.74713		3.13593		7.09209		7.66328		6.03622
	4.62566		6.51203		8.59508		7.13059		7.62399		7.86762		6.68908		6.07088		7.56399		7.59741		7.35544
	6.36501		5.56594		7.809		6.78559		8.31048		8.35531		4.79049		5.57493		7.84846		3.23357		6.33721
	7.39752		6.32143		6.42318		5.72041		7.26141		8.24405		7.2713		5.37226		8.17935		7.92768		5.95241
	5.11781		6.66153		4.11676		6.86131		4.76567		8.06541		6.06541		6.34346		6.66605		7.31425		6.64172
	3.98323		6.55071		6.80539		6.71874		5.59705		8.33287		5.01754		5.19921		8.43987		8.61003		6.66755
	6.22464		6.83755		8.62158		6.64402		6.93802		6.98225		6.39304		3.08329		5.41517		7.15945		6.53883
	5.75837		5.56368		5.16946		5.48852		7.12444		8.15964		5.11427		6.76538		6.68834		7.14233		6.70076
	6.57157		7.25517		4.16372		4.81947		6.89414		7.6754		7.51667		5.55687		6.4727		4.51579		7.57616
	6.9629		4.77068		5.97516		6.26021		6.9573		8.62349		6.82609		6.48898		5.87925		8.9899		7.36295
	5.09999		5.94007		8.45819		6.26919		7.26058		7.98515		7.34482		6.42126		5.76023		8.07353		6.23046
	4.62566		5.66677		7.87975		6.69201		7.56031		8.31077		6.88029		4.05733		6.31718		4.34756		5.35569
	7.31896		6.80408		7.41046		7.18257		5.6989		5.48118		6.84762		6.62698		4.58435		7.6153		4.59036
	4.57831		7.65157		7.89261		8.39835		7.30557		8.78617		6.69712		5.3101		7.77736		5.47378		6.50676
	8.35642		5.96914		6.90957		7.36669		7.05051		7.61618		4.41401		6.15823		3.25656		4.24305		5.81449
	4.4628		6.78559		7.50959		5.68096		7.54733		6.60566		7.52879		4.16372		8.26248		6.54224		6.0263
	6.06678		7.42533		8.74606		5.12134		7.08371		6.9172		2.87356		7.5846		6.40579		7.3115		6.82481
	3.81617		5.0018		7.13342		6.77823		5.94162		8.08323		6.90898		6.97621		8.25254		8.0561		7.30041
	7.69331		6.21643		8.48022		6.45058		7.36407		6.87786		6.82737		4.52222		7.68412		8.31728		5.86093
	6.34138		5.25619		0.858662		7.52657		7.55755		5.48608		6.59362		1.87026		6.68023		7.94853		6.26919
	4.42113		6.03198		9.14222		6.74268		7.5414		7.33832		6.99477		7.17673		6.0134		6.9888		7.47037
	4.06749		6.49968		5.16946		7.68195		4.60817		8.08614		6.30324		5.35569		6.84888		4.62566		6.14693
	2.51689		7.84777		7.76792		6.68319		7.22169		7.86852		6.65396		7.60595		6.16072		7.82751		7.39861
	3.46135		6.98553		5.42301		5.97964		7.85694		6.4617		6.5666		4.20857		6.40968		8.03587		4.48965
	5.76763		5.94162		7.63545		7.87729		6.83565		7.46091		5.41254		5.82674		8.04518		8.07169		5.93696
	8.99416		7.47973		7.52911		7.20693		7.98153		7.2078		6.62776		5.19268		8.45014		8.58432		5.80742
	5.61225		6.42414		8.78291		4.46958		6.13422		8.48791		5.97366		6.99314		9.16717		8.6859		7.00124
	6.43745		5.52915		8.02145		6.76402		9.06777		7.72638		7.11008		6.3741		6.40968		8.2347		5.35847
	4.60227		5.825		9.08048		7.13248		7.79403		7.19681		4.59036		1.26413		6.3589		7.27089		6.40482
	5.4099		5.74713		5.44872		6.91486		8.33045		7.75434		5.58161		8.06355		6.24316		7.42428		4.09734
	5.14912		4.07754		6.3054		6.74685		6.75169		8.25116		7.23666		5.92284		5.8693		7.45034		6.63786
	3.08329		7.21173		2.96887		7.0546		5.8693		5.36125		7.18481		6.01628		6.61993		7.86422		6.79752
	8.08269		5.93384		6.79752		5.08184		6.92535		5.64823		7.06876		7.20605		5.56819		3.9497		5.73577
	3.38439		8.23814		7.2904		8.30423		7.91008		7.59087		6.10173		6.4251		6.71158		7.37152		4.17285
	5.69494		5.9974		3.70647		6.98498		7.69169		7.13953		6.96568		4.38502		7.89239		9.16969		4.67637
	3.85439		6.10305		6.70871		7.22169		7.32052		8.66383		6.6262		6.34242		4.1545		7.29681		7.12823
	4.16372		6.97234		9.03646		6.44778		8.79174		7.1946		6.11094		6.75856		5.1661		6.48898		7.3433
	6.23046		5.47872		6.61044		6.83183		8.13867		8.77227		7.70268		6.26583		6.68834		7.7845		7.12444
	7.62715		5.83712		7.71512		6.24086		6.78825		7.76617		7.00177		4.80024		8.15287		6.90603		5.92442
	4.26816		6.71373		8.02473		5.21857		8.045		4.9613		6.74338		6.95505		7.7109		7.09601		5.3473
	4.91045		5.06335		9.32256		7.61414		7.92385		7.3577		5.49823		5.78592		5.93384		6.93228		8.11778
	5.49339		4.70348		7.22813		6.57979		8.07574		7.08371		6.47634		4.64852		6.88694		7.48206		4.85226
	5.63568		6.10831		8.58023		5.68897		7.63773		9.20773		6.33408		2.90635		8.61881		7.26925		9.40634
	7.38845		5.86261		9.15284		6.3589		7.58789		8.59878		6.45337		6.59119		7.8013		7.33332		6.43745
	2.9381		7.05511		7.27335		4.25986		5.66677		8.95753		7.62081		7.00124		7.26678		8.12076		5.56141
	4.68185		5.9974		7.35995		5.63779		6.9729		7.70534		7.50147		6.65015		6.39106		7.27458		4.13581
	6.65472		5.93851		8.227		6.36094		7.65883		7.90007		6.94827		3.49772		6.53713		7.78081		6.93171
	5.74901		7.54546		5.03305		7.42463		8.78273		9.07333		6.42796		7.79985		6.04744		7.26554		3.99416
	7.4867		5.68497		8.36292		6.81255		6.83056		7.77587		6.16693		6.27698		6.31077		7.8746		6.88995
	7.80468		7.22985		7.75206		7.71275		7.94853		3.93828		7.41366		6.41452		6.15071		8.26689		6.61598
	6.39205		5.92599		5.54541		7.50213		6.93401		7.96997		7.3213		4.09734		9.1534		7.86082		6.07088
	4.96543		5.39929		4.88401		6.40286		8.22621		7.18571		7.00713		6.8312		6.58551		6.36501		7.49723
	5.52446		5.22494		8.86052		5.59924		8.36745		9.04909		6.45801		6.57897		7.30755		6.48178		6.28141
	5.57044		6.94202		8.76622		7.90878		7.76341		8.95319		5.92757		5.18939		5.49096		7.46565		7.12728
	4.72464		6.48718		7.14698		6.50852		7.5186		7.31582		5.03305		5.88254		5.71069		6.68392		7.11297
	4.37021		6.14819		7.93869		7.01934		7.95082		8.29218		5.3473		6.82095		6.05301		7.92235		5.2865
	6.86008		7.57314		8.23954		6.05023		6.66455		7.98455		6.9668		5.08914		7.24638		8.73074		6.24201
	4.17285		6.67279		6.15823		5.66063		8.29513		8.46927		6.92535		7.23539		6.86317		8.25362		6.45893
	5.65858		6.4663		7.70188		6.69712		6.86932		8.47199		5.07079		6.00179		7.65241		8.43348		6.53456
	2.03732		5.8693		8.00563		7.46835		5.79134		8.1871		7.38442		5.41517		6.71158		8.18315		5.71069
	7.03971		4.06749		6.42605		6.88573		7.28717		8.66972		7.99096		4.82423		8.23329		8.09176		6.59119
	7.292		7.1493		4.42819		6.91075		8.43974		7.67156		6.36196		3.21004		8.17205		8.42484		5.7262
	7.74059		6.57074		5.31301		7.15669		6.92767		8.89191		6.38212		4.26816		6.30108		7.26265		5.36401
	6.50234		4.06749		6.30432		7.54733		4.4491		7.30755		5.96763		5.71653		6.68981		8.09194		4.66532
	5.70874		5.75276		2.03732		6.47543		7.41721		7.1096		6.04185		8.71042		6.39993		8.63834		7.35807
	7.04023		6.60726		6.51465		6.98989		6.22814		8.2991		6.48448		5.78953		6.46722		7.73827		6.9363
	5.06708		6.80604		8.51972		6.58957		7.0847		7.82067		6.71015		4.43521		6.31612		7.41437		5.74713
	4.26816		4.2173		7.48835		6.90426		7.72403		7.79476		4.63142		5.79134		5.18279		7.31386		6.90662
	8.93525		5.25619		6.32672		6.63631		6.81385		8.8611		7.16539		8.40814		7.78475		8.40445		5.59266
	4.54127		6.735		7.66963		6.32883		7.30755		7.43687		7.97404		5.8003		8.7293		7.69223		6.06541
	6.46078		5.10716		7.43652		7.35242		4.19976		7.56001		5.58826		6.44497		6.86993		5.80209		6.08843
	7.19416		6.64479		5.63146		6.60327		6.41259		8.69028		5.1661		4.37021		4.38502		6.73919		5.19595
	6.43461		9.33164		9.04387		7.28272		6.41742		3.05589		6.23625		5.96461		7.78818		6.88935		7.08964
	3.63125		5.48363		7.45649		5.25311		8.07353		5.86596		6.26695		6.49524		6.71445		6.83438		6.65624
	4.22596		5.47872		8.78273		4.25149		6.61123		8.46555		2.11142		7.27947		6.91134		7.67868		5.0018
	4.68185		6.41549		5.19921		7.88974		7.31543		7.28555		5.77499		6.74407		6.51988		6.30755		6.64172
	4.83834		3.91502		6.30648		6.36805		8.40379		7.97546		5.38316		6.45893		8.73558		8.0617		4.96543
	5.65652		6.95449		9.89774		7.68439		7.73467		8.0794		6.38511		5.8003		6.69347		7.46125		6.27698
	7.04641		5.51024		6.86255		6.84386		8.10912		7.24386		6.42796		7.34292		8.17935		5.07079		7.1038
	7.5597		6.59765		4.1452		8.45241		6.89773		7.74953		5.40461		5.86093		8.86595		7.37041		5.66268
	3.86682		6.67205		8.43296		7.47907		7.82892		7.5202		6.91075		6.34346		7.62658		5.28051		6.32461
	5.82325		6.10041		10.6216		6.03622		7.61588		8.64822		8.92338		5.37226		5.91967		7.75358		4.50281
	3.5499		6.86378		8.01132		5.76763		7.31857		6.59926		7.16082		5.91809		7.60947		7.04178		6.94997
	4.50281		7.85305		6.84071		7.35694		7.78646		7.34062		5.2865		6.82095		7.61414		7.81759		2.73046
	8.14314		5.32169		8.60377		7.14419		4.11676		6.5129		6.86993		5.28351		6.98608		6.41742		5.66881
	4.73506		6.15071		8.11319		6.58876		7.25183		8.51665		5.97666		8.74803		7.33178		8.28491		7.23198
	4.53496		6.06129		8.50358		7.97262		7.17357		7.87773		7.08668		4.56612		6.82224		5.05962		6.15448
	3.05589		6.95449		6.54054		6.39205		7.17718		8.53606		6.89354		6.77216		5.01363		7.46057		6.19259
	4.82423		6.11355		6.86993		6.60885		4.38502		7.76341		5.97964		5.24692		8.54632		6.87543		8.17654
	8.19087		6.94544		6.38411		7.07427		6.81838		6.75375		9.53755		6.47725		4.67637		7.72455		6.5294
	8.6868		6.62854		9.07259		6.81967		6.57733		8.79219		6.69054		3.99416		7.73441		7.01458		6.20815
	6.51378		6.89892		4.66532		7.45581		7.15577		5.63146		7.03971		4.91478		7.13059		8.12967		6.14313
	6.24887		6.14567		6.04884		6.107		6.72513		7.96588		5.47625		6.33198		4.71411		7.54171		6.43745
	4.1452		7.28515		9.63937		5.60142		5.6187		7.17492		7.58998		6.07088		6.26919		8.29439		7.90117
	5.60142		7.58219		6.78825		6.195		6.90662		8.42562		6.62228		4.1452		5.44618		7.13812		6.43366
	5.7565		6.62542		7.20561		5.07449		5.99886		8.46318		5.83194		5.0292		7.95373		4.80509		7.39027
	3.66202		5.91967		4.77567		6.91778		6.49879		7.8904		7.92406		6.592		7.83127		7.99136		5.84739
	4.73506		5.27146		8.57021		5.30131		7.08074		8.80943		4.37021		8.48365		5.33315		7.67813		5.27449
	0.858662		6.24201		7.35845		7.13812		7.76517		6.03057		6.76674		4.99782		5.77315		8.08414		4.99383
	6.21289		5.97516		7.15162		7.49854		7.22556		8.60399		4.90171		6.97566		7.36818		6.72513		6.96624
	4.88401		6.53284		7.29641		6.53542		6.26246		7.77587		8.42238		7.23283		6.6262		6.26583		7.21042
	6.45058		4.13581		9.01359		6.71517		7.48007		5.17948		6.63554		4.23454		4.42819		8.50167		7.64227
	4.89732		6.25456		8.3236		6.60885		7.37485		7.9783		6.94657		7.44103		6.2803		4.36272		5.66063
	6.13166		7.95455		7.51796		7.43164		7.9215		5.49096		6.84449		6.22347		5.8003		5.94162		8.29129
	5.32744		2.51689		9.11799		4.17285		7.01723		8.26628		4.06749		6.76674		8.27022		6.96624		5.95853
	7.60918		6.85698		7.89107		7.69707		9.56329		7.58159		5.8891		4.28455		3.42361		7.12111		6.11746
	4.58435		3.16125		8.87184		6.56494		6.20339		7.50732		6.87968		8.76004		3.97218		6.23394		6.20339
	7.56031		4.30865		8.06689		6.6144		8.37618		8.54345		6.82545		4.75557		7.25892		8.33641		6.26919
	3.38439		5.68497		9.2111		7.18123		7.11201		7.56093		5.75276		6.847		3.42361		8.06281		7.78131
	6.98006		7.87885		7.70587		8.73824		7.49788		8.25069		7.56797		5.4099		6.52509		7.75813		5.4713
	7.91441		5.75276		6.51553		2.99873		7.27825		7.54421		4.26816		7.77389		8.24234		7.76166		5.13879
	7.84707		3.74903		7.57677		6.99152		8.50179		2.18042		7.53196		6.35172		4.12633		5.90691		6.23625
	4.28455		4.2173		8.73824		7.17763		8.36621		7.93848		4.82895		4.96954		5.64198		8.52266		4.50281
	5.5523		6.92767		8.42484		5.68297		6.26359		9.47466		4.50281		8.02203		4.83834		7.52307		6.46354
	3.51542		5.99886		7.25351		6.6215		7.40437		7.57283		6.17187		8.7605		6.24201		8.45317		6.82224
	8.03911		5.52681		6.56743		7.10525		7.02145		8.21908		6.89534		5.01363		6.47179		7.86286		7.3283
	2.90635		6.39304		7.94414		6.45337		6.42126		6.64862		7.3111		6.6215		6.41549		7.38735		7.36145
	4.9613		6.72866		8.40932		6.45616		7.83056		6.61756		5.0292		5.47872		4.52861		7.24048		6.48087
	5.73386		6.54902		8.72222		6.00906		8.35795		7.94624		6.77486		7.58699		5.90047		4.13581		5.14912
	3.76283		5.2865		6.83247		5.3501		8.76253		6.98225		6.52768		6.64172		7.95103		7.76717		6.3589
	6.53113		6.80277		5.3303		6.3393		7.60507		8.26127		6.82545		6.7371		6.04185		1.66959		6.19017
	7.11297		5.31881		5.51974		7.35694		6.21878		8.37114		5.19268		7.19814		5.5431		7.05		4.54754
	3.98323		6.92593		7.38406		6.58876		7.60243		8.04953		6.01484		5.89886		7.06675		8.28966		7.52625
	2.4681		5.99004		9.66269		8.10056		8.075		7.12491		7.1192		4.79538		6.73429		7.49		6.04465
	3.5499		6.67279		7.74264		7.16174		7.07627		8.46268		7.3637		7.42216		5.9037		7.63858		6.93745
	4.57223		4.84765		5.84398		7.74392		7.09062		8.31005		6.67205		6.61756		6.29456		6.80865		2.36274
	6.30108		5.65652		6.17064		4.73506		8.08741		5.59486		4.88847		6.22113		7.68927		6.06541		7.05765
	7.27906		5.59705		5.12486		4.04708		8.8478		7.12823		6.90129		4.85226		6.11746		8.24622		5.85756
	5.69693		6.90781		6.42222		7.11057		8.03568		8.30145		3.67706		6.90011		7.17718		7.36145		5.17948
	4.88847		5.72041		6.88211		7.04229		7.14419		6.61993		6.86193		6.26246		7.55631		6.50852		6.87725
	7.56613		6.49434		4.69811		8.43348		8.41051		7.94373		5.55459		4.72986		6.41742		8.03051		7.37707
	5.76579		6.00179		9.16322		6.50322		6.396		8.15032		7.24343		4.38502		5.0292		6.73289		6.46262
	5.23127		7.4204		8.29616		6.81838		7.40688		5.54771		6.27365		5.34166		5.94162		7.24005		6.70003
	4.50932		6.68245		4.94464		7.07377		7.62514		7.7513		6.29674		6.26246		5.43851		7.92		6.66002
	5.30425		5.48118		5.87262		7.07627		7.76191		8.69671		6.90307		6.26807		6.05023		7.34444		6.58061
	6.18532		6.29891		7.56979		7.71381		7.04436		8.04025		6.85636		4.30068		6.01195		6.32037		6.21878
	4.17285		7.0617		3.91502		6.71802		6.82609		8.82047		8.12828		7.80996		5.62723		8.20757		5.57716
	8.01034		6.23856		6.86809		5.58383		7.06675		8.658		7.05256		3.98323		7.24048		7.86581		6.64172
	3.67706		6.201		5.86261		7.20254		7.49329		4.09734		6.27698		4.27639		4.66532		7.88242		6.81515
	7.63403		7.54733		6.03198		7.97221		7.65157		6.52682		6.41549		4.02624		4.29265		8.35476		7.26265
	8.03968		6.64326		5.375		7.23369		6.95786		7.6326		7.19105		4.94043		6.49345		8.32303		5.22811
	5.04071		6.43082		4.90171		6.43366		6.68319		8.27067		6.68761		7.09894		5.9856		7.69546		6.57157
	4.46958		5.51974		5.92442		6.87725		7.11585		8.416		6.73989		5.72234		5.90209		7.88353		4.64285
	8.19739		7.04436		7.90683		7.42075		6.49702		7.92875		6.76198		5.26842		4.98176		8.9344		7.52911
	7.71381		7.6121		4.39962		6.75444		6.44497		8.43962		7.33255		4.61403		3.64675		7.36033		6.89653
	2.73046		7.39969		7.75914		7.79719		7.30319		8.20837		7.46023		5.61225		6.32143		4.30865		5.85418
	3.4797		7.3115		7.55693		7.49756		6.42701		8.21542		5.43595		6.02488		5.89886		7.63146		6.59926
	5.32169		6.78158		3.92671		6.87725		6.76946		6.8119		6.53627		5.08914		5.65652		3.97218		7.00124
	4.60227		5.68096		9.11006		7.15715		7.39245		8.63383		7.30438		5.83712		6.58143		8.04215		6.20933
	4.95716		4.97363		7.7719		7.58489		6.24086		7.84268		4.87053		4.30068		6.51727		8.20741		8.51417
	5.48118		6.735		7.47773		5.92284		3.38439		7.90596		6.91603		5.51974		6.36298		7.66991		7.03661
	4.66532		6.53027		5.13533		5.38857		6.60805		6.78625		6.62776		5.21216		2.60786		8.17055		5.85587
	6.18045		6.29456		6.99962		7.14652		8.46815		8.00149		6.21995		6.97455		7.31896		7.33448		5.62935
	3.67706		6.29891		4.41401		4.90171		7.36743		6.39106		7.52052		5.74146		8.45694		5.36677		5.71459
	3.8031		4.37764		6.28141		7.66936		6.89951		7.90943		6.89951		6.03763		5.96461		4.01566		4.13581
	6.00761		6.36602		7.90269		6.53027		7.2126		6.61361		6.94827		8.64126		7.47773		8.37292		5.29837
	7.04178		5.80209		9.17049		7.03036		6.68466		7.51281		6.67874		8.23548		5.98114		4.95716		6.85075
	4.4628		7.20998		7.36258		5.36677		7.96527		7.51731		5.99886		6.58306		7.34406		7.23921		4.86599
	3.84182		5.515		4.61986		6.70582		7.30795		6.21878		6.5129		4.9191		6.98771		6.41549		7.24259
	4.38502		6.16817		7.61297		3.67706		7.69142		6.10963		5.21857		3.9497		4.01566		7.24428		6.6854
	1.26413		7.22942		7.05765		7.67759		7.15669		7.04538		5.67894		5.27449		6.53542		6.83944		5.4713
	4.48965		5.14912		7.98756		6.72866		7.65493		7.88908		5.48118		4.65415		6.11485		7.64368		5.61655
	5.5431		6.00324		9.9773		6.26134		7.81759		7.83127		6.23856		6.90544		7.06574		4.07754		7.31582
	3.21004		6.85138		5.74524		6.6215		7.5704		8.01601		7.61734		6.94145		4.19087		8.76925		1.66959
	8.57111		5.6144		4.90609		7.24848		5.97964		7.97465		6.53713		4.95716		5.76208		5.41517		5.86763
	7.84707		6.07224		7.90618		7.35242		8.40141		7.98856		8.03339		2.83966		6.59038		7.92747		7.10815
	6.48718		6.25908		8.49203		7.06625		7.1946		7.92747		7.44449		4.91478		6.52682		7.47707		6.49879
	3.87909		6.49702		7.31032		6.02772		6.47088		7.65185		8.9954		5.01363		4.3399		8.61998		4.40684
	4.20857		6.13422		6.66755		7.35732		6.81838		8.38807		6.6638		4.78063		5.76579		8.07409		6.45523
	5.79673		6.85013		6.61598		6.27031		6.49968		7.43999		6.67949		7.30041		6.85511		8.03797		5.27146
	6.89474		6.01628		7.02092		5.7262		7.90422		7.3939		6.41259		4.91045		6.29238		6.45058		6.54733
	8.33711		5.93227		4.92341		7.44138		7.2912		8.25469		7.24259		6.57815		6.1406		7.76966		6.65927
	3.72086		6.53456		5.38316		6.88634		6.42796		7.2468		7.1999		5.26538		7.29961		7.92662		3.05589
	4.00497		6.57404		7.52275		7.74902		7.42498		2.96887		4.55996		8.07922		7.44449		7.74978		5.28351
	0.57098		4.13581		3.84182		6.83247		4.65975		8.03147		6.87725		5.98411		5.24381		7.87213		6.16072
	7.25933		5.41254		7.92192		6.50676		4.51579		3.34357		6.70438		4.9362		5.22811		6.4251		5.89886
	4.72986		6.47634		4.62566		7.39318		7.3939		8.69167		7.60095		6.72158		7.35393		7.19593		4.61986
	6.31931		6.86501		8.9573		6.84008		7.82019		7.79525		5.52915		6.86378		8.32073		8.86445		6.41452
	7.74774		4.22596		5.97666		5.55914		7.09942		6.69054		6.63399		7.52594		5.51974		7.07577		5.18279
	5.48118		6.89115		6.65244		6.79422		7.41224		7.53669		6.7364		5.9974		6.53969		7.42216		5.56594
	7.01617		6.79554		7.56277		6.07224		6.80539		7.52879		7.21824		6.73219		6.69493		7.45819		7.39716
	7.78475		6.28251		7.17085		6.6698		7.31857		8.8696		7.15945		5.23442		8.39302		5.79673		6.44872
	4.53496		5.76948		6.55324		7.23624		4.63142		7.77661		6.0736		4.40684		7.69707		4.39235		6.09377
	4.25149		6.15823		7.64763		7.2811		7.99355		7.50894		5.52915		5.81273		5.72041		8.00622		5.07079
	5.09277		6.77554		7.11201		5.47872		6.73219		6.02059		7.56308		5.97065		6.52854		6.02202		6.12394
	6.03481		6.90544		6.64095		7.25726		7.03297		7.28555		7.01033		6.06129		8.46629		6.29565		4.63142
	5.336		6.69858		4.00497		7.302		7.76567		8.56212		4.58435		5.62723		6.48808		9.15564		4.72986
	5.37226		4.71411		7.14046		7.84846		7.55322		8.23767		6.18532		6.0134		7.35958		6.45523		5.6251
	4.05733		5.34449		8.89967		6.45244		4.08749		4.91045		7.05968		7.43861		6.38012		8.27624		7.82681
	6.57322		7.26966		5.61225		7.3283		6.61914		7.50991		7.24048		5.80387		6.57651		5.0097		6.24773
	7.57979		4.90171		7.43094		7.39245		7.22556		7.75864		7.51475		5.09999		4.37764		4.42113		4.61986
	7.43757		6.19138		5.51262		6.51988		6.35685		8.224		6.88694		5.825		6.9443		7.97079		5.76208
	5.62723		6.80212		7.05511		8.06058		6.49613		7.72846		7.04075		7.50732		7.87662		8.36827		4.57831
	3.49772		5.63988		7.38589		6.17187		7.52339		8.41024		5.13533		7.41224		7.11729		7.66161		6.36602
	5.29837		6.94316		7.25726		6.42605		7.27662		8.06207		5.53149		7.34635		7.92192		7.73467		6.47452
	5.11427		6.9007		7.9103		7.3577		7.43965		7.53669		6.98061		7.90291		5.31591		7.05256		3.21004
	6.92419		4.95716		7.30992		7.91419		8.4648		7.11872		7.12539		6.71158		6.60965		5.6251		3.23357
	3.36419		5.61655		6.55576		7.16082		7.45547		7.74825		6.12909		4.98176		5.41254		7.59622		7.27007
	6.57404		7.0546		6.56826		5.50065		7.09062		6.26583		6.31291		6.18654		3.23357		7.49099		6.25456
	7.94435		6.49166		5.56368		5.96157		6.33721		7.48273		7.22728		3.32251		6.8607		7.92683		5.80919
	3.30101		5.88746		4.52222		8.54322		7.36594		8.30276		7.22771		7.01033		6.71517		8.10182		6.88814
	5.30425		5.69693		7.42216		6.3741		6.97841		7.35619		6.86747		6.44216		5.47625		7.27335		7.24217
	5.0292		6.09776		6.63631		8.08542		7.9313		7.06625		5.59266		5.68096		5.58826		7.95144		5.83194
	3.69187		6.01628		5.22494		7.07377		8.37917		8.89475		6.50587		4.55377		6.07767		7.54702		6.84637
	4.51579		7.31032		6.69128		7.07177		8.39008		7.76891		7.30676		5.81273		6.53883		8.5769		6.31612
	7.69948		4.87504		5.70874		7.65521		5.25926		6.6698		6.33408		5.17281		3.40419		8.57133		7.3637
	4.94883		6.6638		8.00208		7.12728		6.35069		7.53101		6.44404		4.1452		5.46133		7.78106		3.97218
	3.46135		6.08977		9.12592		7.51346		7.57071		6.3097		6.6262		5.80919		6.4365		6.08037		5.96914
	4.82895		5.76579		9.03026		6.72229		6.61677		7.07975		6.40482		7.18123		6.56244		8.75531		6.22464
	4.96954		6.42796		5.68096		7.65101		7.60184		8.83354		6.68392		6.30432		6.09111		7.71486		5.16273
	5.17615		6.40676		8.99291		6.67279		7.54919		4.74537		5.73957		4.72986		7.94686		8.21717		6.81773
	3.25656		3.66202		6.67055		5.50065		7.59859		8.9654		6.9888		6.51203		6.68392		8.21158		6.49166
	4.12633		5.21537		3.08329		7.31032		8.21542		4.00497		6.80539		4.23454		9.08937		7.26058		5.66677
	7.73441		4.49625		6.27142		6.751		7.29961		8.34275		7.82516		4.99383		7.23241		8.07096		6.50676
[truncated: 6,530 more rows]

## Sheet: Fig-3C-TMRE dist
	WT
	loge(Cell size) (a.u.)	loge(TMRE intensity) (a.u.)
	9.78669	9.40494
	10.0017	11.4509
	9.9698	11.7212
	9.36831	9.12118
	9.48182	9.75191
	9.4113	10.7578
	9.60787	6.52545
	9.73908	8.31336
	10.1688	7.3332
	10.4204	9.93569
	10.0759	8.01766
	9.37303	7.99626
	9.83434	8.63402
	10.0447	9.95691
	10.5738	9.93593
	9.87049	6.58982
	9.79867	8.38647
	9.42984	7.71492
	9.92023	7.79379
	9.62427	8.62161
	10.1232	5.33098
	9.81133	6.92382
	9.67351	9.00743
	10.2114	9.38663
	10.1485	9.07631
	10.0834	9.35065
	9.82351	9.80157
	9.53329	7.67331
	9.63384	7.74754
	10.0616	6.29373
	9.73736	10.0919
	9.44246	4.32546
	10.0039	7.65855
	10.109	9.2343
	9.28661	8.90761
	9.7577	11.5004
	9.43398	7.95666
	9.41784	7.97178
	9.02999	7.24323
	9.6014	7.25309
	9.66302	8.31305
	9.92575	7.17568
	9.44892	6.12551
	9.13341	6.45962
	9.37653	7.69333
	9.80659	7.3332
	9.60414	9.14426
	9.06589	8.5299
	9.27795	6.67206
	9.74076	7.35398
	9.72873	9.22199
	9.98509	10.9601
	10.2078	10.5033
	10.0313	9.21172
	9.89082	11.481
	9.70028	8.8183
	8.85084	10.4623
	9.44863	7.61603
	9.63192	8.83879
	10.0023	7.70191
	9.85163	7.92368
	9.16073	7.27602
	9.92252	11.4264
	9.81215	7.94445
	10.0327	8.02635
	9.85616	9.07256
	9.27543	4.93159
	9.5442	8.33188
	9.66321	9.45555
	10.1618	7.98022
	9.76073	6.80059
	10.1299	10.438
	10.1989	9.98267
	10.2014	8.65201
	9.27956	7.82499
	9.3069	6.67524
	10.2491	8.21711
	9.88976	7.94846
	9.53995	5.77629
	9.9347	7.97025
	9.78669	8.97369
	9.17147	6.85915
	10.0323	11.6826
	9.88892	9.93539
	9.35021	6.52914
	10.3891	9.97554
	9.6532	8.9929
	9.10531	8.06054
	9.64128	7.72331
	10.4641	11.1625
	10.3456	8.82545
	9.10214	10.4799
	9.53892	8.84724
	10.0885	10.1402
	9.41026	10.5901
	9.51946	7.60197
	9.60242	7.49514
	10.1701	8.12729
	9.83987	7.32119
	9.81433	9.57686
	10.1729	9.76274
	10.0093	8.73441
	10.3562	9.55232
	10.0163	8.44504
	9.29146	5.56624
	9.25892	7.63722
	10.1486	10.3287
	10.436	7.92914
	9.14692	7.10117
	9.75731	8.12841
	9.21972	7.22962
	9.55478	11.1225
	10.3764	8.39391
	10.3589	10.8319
	9.814	5.75257
	9.38362	8.69099
	9.47746	6.7779
	9.16662	5.59005
	10.5729	9.1305
	10.293	9.37285
	9.99434	10.1779
	9.95199	8.42948
	9.67152	7.23053
	9.38362	10.9499
	9.28424	6.83641
	9.94823	9.67125
	9.96491	10.051
	9.20859	7.23236
	9.41448	7.05004
	9.21451	5.53938
	9.77499	9.67641
	9.27233	4.84623
	9.56683	11.2961
	9.84366	8.81671
	10.379	10.7537
	10.0507	6.97281
	9.83474	10.1005
	10.4002	12.1185
	10.0543	8.33612
	9.60853	8.68972
	9.4801	9.1865
	10.0498	8.50074
	9.8853	8.92209
	9.50944	10.6747
	9.89416	10.4294
	9.34104	7.08124
	9.20264	8.30264
	9.39672	4.76907
	9.75104	7.99986
	10.5209	9.38779
	9.57732	7.0407
	9.51272	8.48499
	9.89291	11.4718
	10.0522	9.36603
	9.50011	9.48614
	10.1193	8.20857
	9.9568	8.23263
	9.35561	11.2526
	9.24097	9.0817
	9.31152	6.48974
	10.1367	9.29011
	9.24612	8.00049
	9.28813	7.35236
	8.98713	5.78019
	9.29553	7.42442
	9.80634	8.17631
	9.18325	7.097
	9.48336	7.14037
	9.46306	6.65029
	9.60883	8.31088
	10.2227	8.96921
	9.68206	9.09296
	9.78778	7.38885
	9.69656	6.27493
	9.43158	9.34725
	9.99122	8.41255
	9.18117	10.8475
	9.40786	10.7389
	9.72304	8.93379
	9.71832	7.33976
	9.27247	9.70158
	9.54624	8.04854
	9.38438	6.39653
	9.21555	8.17063
	9.87412	8.24743
	9.97061	9.3816
	9.92839	10.4727
	9.97064	11.277
	9.23798	4.0266
	9.59815	9.26095
	10.0879	10.126
	9.52943	8.39662
	10.1648	7.31408
	9.672	9.11572
	9.83233	9.84868
	9.25999	6.70731
	10.445	9.38223
	9.56309	5.67136
	9.49386	6.6957
	9.20844	7.57873
	10.0853	7.45732
	9.59957	7.10583
	9.13097	6.02107
	9.98093	8.66416
	10.445	10.0464
	9.7212	8.67002
	9.77554	11.4813
	9.63869	6.80828
	9.99373	11.4816
	9.37552	9.12777
	9.64323	8.58907
	9.75138	7.10995
	9.14179	9.13343
	9.22764	8.11267
	9.28131	8.35422
	10.2087	7.07166
	10.1932	11.0748
	9.6984	11.3086
	9.41894	8.34124
	9.7093	9.03971
	10.0115	8.26477
	9.46341	6.19598
	9.69973	9.22826
	9.64371	8.89405
	9.57561	8.09399
	9.47769	8.54692
	9.58576	8.02902
	9.50588	11.0796
	9.73802	10.1786
	9.86192	8.22016
	10.2322	9.25807
	9.64963	7.03462
	9.88629	11.1894
	9.79933	9.43639
	9.8291	9.21756
	9.0564	5.70967
	10.3953	9.82044
	10.0515	9.82515
	9.91813	11.0222
	9.85017	8.07614
	8.78764	10.311
	9.49618	8.22911
	9.6475	8.8417
	10.0761	8.29795
	9.34058	9.46868
	10.1674	10.2398
	9.60176	8.59457
	9.40218	7.81868
	10.0542	6.91008
	9.4874	7.16551
	9.64366	7.67155
	10.061	8.89102
	9.56535	6.72032
	8.97173	7.31534
	9.46335	8.19178
	9.46201	6.61039
	9.06381	7.14882
	9.57076	10.1145
	10.2407	10.2454
	10.7341	8.35511
	9.9473	8.38403
	9.43925	7.89663
	9.85679	8.67895
	9.45956	7.63143
	9.91802	9.15517
	9.67242	9.31549
	9.9836	6.03625
	10.0373	7.93637
	9.30785	7.17568
	9.22823	7.87723
	9.19307	7.14385
	9.80282	8.43373
	9.96713	10.68
	9.59947	8.60189
	9.74345	7.01103
	10.6637	12.1223
	9.61621	7.51181
	9.66245	8.36734
	9.45458	10.578
	9.98142	9.1559
	9.37016	8.14463
	9.80634	10.5376
	9.10022	8.20444
	10.6069	9.73785
	9.67784	9.57327
	9.98792	7.85914
	9.01451	7.44488
	9.68145	7.53125
	10.0017	7.52651
	9.6442	7.65707
	9.53687	8.12282
	10.211	10.2531
	9.26873	9.33013
	9.4359	8.45702
	9.60257	6.40072
	9.68248	8.24825
	9.49324	8.67164
	9.63551	11.1178
	9.38494	11.1118
	9.30308	7.07912
	9.96987	8.91399
	9.84302	6.12827
	9.37233	7.04236
	10.4628	9.43749
	9.91339	5.67136
	9.66226	6.9734
	9.28334	7.74127
	10.1522	8.70362
	9.25095	5.44876
	9.58468	8.31351
	9.89006	7.21722
	10.243	9.52978
	9.90851	9.78384
	9.97648	9.10184
	9.77302	9.21806
	9.6581	6.31219
	9.24568	10.6986
	9.86793	8.76614
	9.50978	6.85783
	9.6188	8.90676
	9.62729	9.19696
	9.72435	7.79327
	10.1027	8.77718
	10.2396	10.0988
	9.49595	7.36041
	10.161	9.63339
	9.95755	7.43712
	9.99188	7.91221
	9.9547	7.70446
	10.2523	11.4463
	9.32906	6.76272
	10.4003	9.49708
	9.34642	8.44585
	9.9836	8.33491
	10.319	9.16352
	10.2684	9.68377
	9.30123	8.39988
	9.30164	6.43365
	9.99287	7.16502
	9.81166	7.12172
	9.74195	7.00762
	9.45499	9.43135
	10.3495	7.9175
	9.96431	9.11274
	9.16443	6.16203
	10.2627	9.43231
	9.80158	7.7333
	9.39154	7.06683
	9.49725	9.13016
	9.27	10.7392
	9.78136	8.69216
	9.27557	7.05167
	9.30246	7.7355
	9.12331	8.23548
	9.5718	9.15643
	9.79433	8.33249
	9.51466	6.46061
	9.98892	10.1174
	9.95698	7.89287
	9.13559	6.64046
	9.39185	7.65289
	9.45434	10.965
	9.521	9.54103
	9.59453	8.49122
	10.0475	9.13886
	9.94586	9.03836
	10.6055	7.66861
	9.56777	7.14783
	9.5309	8.98795
	9.47534	8.18179
	9.89469	8.07946
	9.37939	9.37825
	10.0001	8.1717
	9.65156	9.82494
	9.92049	11.2326
	10.1348	8.59597
	9.29395	6.38809
	10.0222	10.0033
	9.40915	8.08724
	9.58761	9.61305
	9.73957	8.55654
	9.23776	6.19469
	9.96456	9.34714
	9.71311	8.07476
	10.0095	10.196
	9.92112	6.65192
	9.42355	-0.462035
	9.22328	7.22825
	9.59565	8.72534
	9.70601	9.64092
	9.42034	6.04673
	9.99177	7.07379
	9.86555	6.53921
	9.72882	11.4095
	9.71193	7.36361
	9.43746	8.59259
	10.2087	9.13384
	10.3001	9.26071
	9.77401	4.32546
	9.91395	7.31869
	10.0774	11.731
	9.98419	7.85987
	9.79508	6.83234
	9.34143	7.67624
	10.2338	10.5371
	9.02422	8.07692
	9.593	9.09452
	9.73261	8.08549
	9.92027	11.5881
	9.4073	11.1652
	9.63025	6.5785
	9.54763	6.97045
	10.3047	11.4022
	9.57112	7.39196
	10.3425	8.7524
	9.67911	9.14008
	9.96092	9.06304
	9.48553	11.0339
	10.3344	10.2121
	9.20377	7.59122
	9.31888	6.49736
	10.1316	8.55375
	9.57992	8.10223
	9.99831	7.60574
	9.66593	7.62314
	10.1728	9.31197
	9.38084	7.25353
	9.64987	10.0863
	9.39116	8.46089
	9.22712	7.3656
	9.43032	7.82449
	10.0351	9.5379
	10.245	9.53084
	9.72909	7.30734
	10.3418	8.84869
	10.0811	8.70383
	10.2013	9.50278
	10.011	8.96406
	10.0929	7.79379
	10.0035	8.37347
	9.3669	7.80772
	9.8218	8.38187
	9.57201	8.97783
	10.1411	8.43933
	8.95831	7.00018
	9.4335	6.76925
	10.9233	10.3867
	9.40366	8.19021
	9.66807	8.81175
	9.68178	10.857
	9.94755	9.8373
	9.83843	8.95524
	9.12707	8.63603
	9.40249	7.25309
	9.47804	5.92316
	10.015	11.3506
	9.64089	9.58104
	9.83168	7.02289
	10.0443	11.8878
	10.1138	8.66111
	10.132	8.7198
	9.99684	10.5976
	9.70308	7.90294
	9.68808	8.26946
	9.54404	8.46501
	9.15551	6.83438
	9.95278	8.2842
	9.95042	9.55518
	9.18024	7.55296
	9.72003	8.78772
	9.81125	11.1311
	9.25484	6.34921
	10.4759	10.0931
	9.70482	9.48709
	9.51554	6.59844
	8.78627	7.28901
	10.183	8.08024
	9.755	7.96304
	9.65122	8.93038
	9.99684	9.58676
	9.1586	3.69685
	9.21196	7.57486
	9.59514	8.22203
	9.88117	7.89334
	9.66731	7.18001
	9.75178	7.81028
	10.0993	8.39562
	9.90903	9.22497
	10.0597	9.20129
	10.0401	8.60409
	9.53941	7.88223
	10.1631	8.29086
	9.55223	8.73207
	10.0434	8.57169
	9.6474	6.57323
	9.51797	7.26418
	9.00746	8.09534
	9.22454	7.49339
	9.51554	9.49523
	9.62333	7.52651
	8.95047	6.97576
	8.98262	5.78019
	9.28096	7.72415
	9.19055	5.4016
	9.46527	6.88526
	9.06511	6.30875
	9.78719	7.79613
	9.33959	8.07359
	9.58725	9.78017
	9.91383	10.5946
	9.89771	5.78987
	10.0719	9.63178
	10.1118	8.82961
	9.30656	7.13285
	10.2949	7.57712
	9.01942	7.5687
	9.56824	5.83691
	9.47735	8.11211
	9.56462	6.89743
	9.69045	9.28099
	9.8427	7.7399
	9.81605	7.82045
	9.57748	9.28877
	9.75064	11.4185
	9.64992	10.9503
	9.28327	9.1266
	9.94067	8.85321
	9.38897	7.03351
	8.92755	7.08177
	9.97173	8.15555
	10.303	10.687
	9.88059	8.51839
	9.91883	8.37259
	10.1294	10.2776
	9.24467	6.13238
	10.0304	9.43211
	9.17598	6.81866
	10.0758	8.03597
	9.78825	8.61546
	9.13089	6.32919
	9.24002	8.49018
	9.40792	11.1826
	9.46916	10.9894
	9.77251	9.55558
	9.47953	7.09073
	9.2163	4.85117
	9.73234	9.23707
	9.63124	5.66265
	10.1985	10.066
	9.43692	5.05943
	10.4958	9.83525
	9.93952	8.88003
	9.71434	8.45916
	9.59269	8.00744
	9.69221	8.89171
	9.13833	7.62745
	10.1521	9.23885
	10.272	8.78367
	10.3915	8.33051
	10.3329	8.89223
	10.1744	8.12356
	9.65891	8.18724
	9.71434	6.96213
	9.86917	9.99191
	9.40094	8.52928
	10.0865	9.65994
	9.95324	11.4198
	10.1715	9.50052
	9.53611	7.87003
	9.52429	7.38534
	9.26547	4.0266
	9.2597	8.17738
	10.2149	8.285
	10.1244	8.09265
	9.4028	7.70162
	9.94006	10.3364
	9.48496	7.35156
	9.33092	8.17844
	10.077	10.2235
	9.74459	6.95193
	9.2238	6.63634
	9.31328	5.83507
	9.45276	7.3572
	9.81895	11.6758
	9.32465	6.87164
	8.99507	10.6967
	9.65151	8.01558
	9.73612	8.47715
	9.82477	6.22632
	9.45105	6.04822
	8.88038	6.78505
	9.16803	10.489
	9.94259	9.27693
	9.68473	7.93005
	9.61546	9.32256
	9.78492	7.11917
	9.47827	8.29354
	9.16419	10.8636
	10.2623	9.72041
	9.60782	8.77212
	10.5368	10.2559
	9.15226	7.99816
	9.43182	7.98731
	10.1827	8.49444
	10.2372	9.14701
	9.51383	9.96559
	9.36984	7.90619
	9.57332	9.30242
	9.50213	7.2319
	9.6169	8.51688
	9.91343	8.79586
	9.1438	4.83628
	10.0602	8.701
	9.71805	9.76209
	9.61039	7.02065
	9.21645	7.09857
	9.93774	11.8374
	9.32806	6.7473
	9.60787	8.54447
	10.0973	8.23598
	9.99735	10.5938
	10.39	9.54414
	9.24503	6.4926
	10.6152	9.91607
	9.52292	7.62345
	9.47124	9.19427
	9.88205	9.57423
	9.7903	10.9811
	9.63938	7.33484
	9.71416	9.52225
	10.4467	9.77492
	10.2436	7.71154
	10.1875	8.21796
	10.3013	8.28325
	9.79198	7.69218
	9.70542	8.89991
	9.38141	5.46755
	10.1294	7.3299
	9.8316	9.73334
	9.65565	7.73357
	9.26943	6.32694
	9.28012	8.54325
	9.14596	7.64206
	10.3284	10.6687
	9.31828	8.70477
	9.26034	6.68237
	10.4385	9.99234
	9.51764	7.89358
	9.14524	7.19383
	8.98667	7.51559
	9.52353	9.39142
	9.38425	7.68901
	9.45446	8.46991
	10.0195	9.42781
	9.6124	9.56535
	9.61135	10.6633
	9.74933	7.54832
	9.57185	7.3572
	9.69026	6.63137
	9.98599	7.88033
	9.38337	10.8306
	9.50577	7.27077
	9.37412	8.30809
	10.4034	12.0471
	10.3882	6.37958
	9.72003	8.18443
	9.97324	9.61989
	9.38034	11.069
	9.72251	9.17866
	9.78403	7.9449
	9.87698	6.63469
	9.52331	8.13508
	9.41277	11.0021
	10.2799	9.11065
	8.96916	5.62701
	9.73252	8.10946
	9.61255	8.01162
	9.32612	8.65201
	9.48165	10.9601
	9.96053	8.35036
	9.64716	7.69991
	9.21816	8.27124
	8.92824	6.86311
	9.44092	9.18939
	9.97864	7.16014
	10.427	8.53672
	9.87235	10.6365
	9.2374	10.978
	9.79888	9.11835
	9.4143	9.26781
	9.15583	5.97572
	10.2446	8.15392
	9.48661	7.80439
	9.1586	7.5363
	9.54554	7.22871
	9.70555	11.2936
	9.26703	10.5594
	9.45728	7.48847
	9.40335	8.45353
	9.55976	8.07887
	9.84119	6.94042
	8.86915	4.8755
	9.78791	8.15355
	8.79392	7.2009
	9.94392	9.45851
	10.0292	9.45046
	8.96447	7.9366
	10.1453	9.39619
	10.0121	9.62302
	9.66255	8.15952
	9.99352	9.39985
	9.79537	7.86786
	9.80861	9.12214
	9.80357	11.0586
	9.74446	9.16458
	9.20097	6.50587
	9.49702	8.22084
	10.4057	9.21881
	9.90623	8.17312
	10.126	11.1763
	9.39254	10.5338
	9.74718	8.19509
	9.08919	6.70731
	10.1331	7.45002
	9.785	9.40588
	9.8909	7.99922
	9.25397	7.05331
	9.77106	8.5501
	9.86963	11.3454
	10.3209	8.03801
	9.16889	7.04785
	9.45081	8.91847
	10.7568	10.7836
	10.5929	9.76777
	10.0425	10.0678
	9.30738	10.5554
	9.79119	7.81766
	9.62645	8.56954
	9.84747	9.0714
	9.56214	7.95644
	9.42905	5.76845
	10.6623	8.91102
	9.67299	8.45621
	10.0591	11.5102
	9.95769	7.72554
	9.9844	9.80568
	9.8468	8.18478
	10.1396	8.00995
	9.08605	7.17182
	10.3772	8.37579
	9.82388	11.0108
	9.16105	6.2914
	9.29801	7.42028
	9.53128	11.2795
	9.44703	8.36279
	9.6184	8.48966
	9.31834	4.2201
	9.89778	8.13858
	9.05193	3.96878
	9.32559	6.53921
	9.20701	7.51215
	9.15813	10.9625
	10.1403	9.48886
	10.0635	9.66707
	9.34367	7.26726
	9.27648	8.8715
	9.2241	7.76907
	9.34583	11.1287
	9.7911	11.4307
	10.168	9.80352
	10.1638	8.54815
	9.99711	8.59317
	10.0188	11.425
	9.57373	8.64948
	10.6066	10.8725
	9.77106	8.41493
	9.46655	7.88271
	9.20264	9.14533
	9.49437	8.3235
	9.62734	7.24413
	10.6464	10.6769
	10.2985	9.89704
	10.0498	9.9811
	9.99636	8.04652
	9.20143	6.32468
	9.8822	9.54007
	9.32986	5.76845
	9.24017	6.96213
	9.57779	8.90548
	9.02612	6.44971
	10.1723	7.70276
	10.0415	6.67126
	8.97724	7.89264
	10.2351	6.27137
	9.49036	5.90272
	9.72583	7.14684
	9.15488	7.75675
	9.51056	7.92163
	9.61755	11.062
	9.62308	8.40567
	9.36786	7.32742
	10.0942	9.01497
	9.07778	5.74252
	9.64386	7.21906
	10.0511	5.53442
	9.55462	7.89733
	9.30274	6.45962
	9.51311	6.29023
	9.18248	7.62898
	10.2323	8.65509
	9.68276	9.51985
	10.2128	10.4711
	9.44632	7.33196
	9.35145	7.05711
	8.92765	10.3199
	9.93992	9.05755
	9.94118	9.59969
	10.3165	9.63554
	9.27949	7.62068
	9.93916	9.2138
	9.90087	8.97241
	9.6169	7.63964
	10.1036	9.50836
	10.0647	8.00932
	10.0392	6.70654
	9.61235	6.9465
	9.81687	6.8618
	10.0514	10.4849
	9.55382	8.80336
	9.87648	8.28849
	9.20866	7.10531
	10.184	8.27236
	9.40001	8.54937
	9.40329	10.8375
	9.76405	9.26977
	9.71787	11.0621
	9.96952	10.5086
	10.0177	9.49708
	10.0192	8.9236
	9.63517	8.00744
	9.30287	7.40315
	9.25311	6.78718
	10.3014	9.63784
	9.98968	8.7521
	10.0858	9.42451
	9.84771	7.98409
	9.85048	7.84493
	9.15186	4.16294
	10.3511	9.28205
	9.12731	7.82196
	9.23161	10.9012
	10.0402	11.2503
	9.2467	6.61123
	10.1884	9.45683
	9.59688	8.71485
	9.68468	9.29376
	9.53324	8.67412
	9.86843	8.46727
	9.56719	8.6072
	9.87578	7.6182
	9.50499	9.86874
	9.3054	10.8044
	9.65872	6.84181
	9.13817	8.1439
	10.3741	9.66512
	10.4601	8.83421
	10.1734	8.18478
	10.0279	8.22911
	9.75361	6.46356
	9.70597	8.00197
	9.14123	7.49654
	10.1706	9.27864
	9.53497	8.26509
	10.1699	10.5924
	9.82987	6.97694
	9.83152	8.23414
	9.64982	7.44304
	9.88166	9.12537
	10.4836	8.19004
	9.87501	7.52413
	10.2887	8.09149
	9.20498	7.34262
	9.1773	7.08018
	9.49166	8.11926
	9.48296	7.81944
	9.12429	11.1247
	8.93409	10.4126
	10.1422	9.01978
	9.88644	7.00933
	9.95844	8.42727
	9.17598	7.05766
	9.56688	9.04165
	10.6425	10.0593
	9.1685	8.47123
	9.71719	7.41346
	10.1158	8.22877
	9.8343	8.36382
	9.77805	10.9667
	9.95399	9.14675
	9.63089	9.64977
	9.63806	10.7431
	9.40063	6.09758
	9.92883	7.66566
	9.96579	8.24412
	10.2246	10.6422
	9.90267	7.53125
	9.95017	11.7806
	10.0695	7.67536
	10.1173	10.3075
	10.1859	8.31444
	9.58044	8.85339
	10.3878	9.98995
	9.8056	9.15816
	9.1871	10.8222
	9.21905	7.0663
	10.1926	5.6907
	9.51167	7.88461
	9.49742	8.36058
	9.65204	8.58355
	9.53487	7.70276
	10.1413	9.78497
	10.4979	6.371
	10.3	8.36426
	9.4609	6.16733
	9.16168	7.74836
	10.3207	8.50611
	9.87006	8.35333
	9.35593	6.9471
	9.31423	7.89967
	9.14868	6.32806
	9.97641	8.08704
	9.84767	7.13887
	9.26284	5.81836
	10.1943	10.159
	9.96343	8.3922
	9.13551	10.4443
	9.95299	9.65999
	10.1943	11.835
	9.44875	7.24727
	9.67817	9.52987
	9.1884	7.74918
	9.38387	8.68387
	9.59504	7.52209
	9.37265	8.65102
	9.55722	7.45914
	9.41668	7.03628
	10.15	10.3048
	9.03151	5.92821
	10.0726	9.75608
	9.80717	9.24975
	9.68435	8.60651
	10.2853	8.60478
	10.6241	9.4445
	9.93382	9.64875
	9.48004	7.04949
	10.2563	6.32581
	9.90982	8.58048
	9.41148	7.90061
	9.15139	10.3786
	9.44425	7.05549
	9.50062	9.07739
	10.4802	9.46439
	9.98882	6.61377
	9.87586	7.76881
	10.0199	7.55197
	10.1811	10.0277
	10.0667	9.68909
	10.0858	9.55625
	9.56124	6.04225
	9.35988	10.3291
	9.22121	7.86376
	9.2258	7.39273
	10.8447	10.7697
	9.75739	7.75053
	9.07228	4.07056
	9.57836	7.73054
	10.0705	8.97504
	9.94604	9.46179
	10.6121	9.57585
	9.76591	6.21882
	9.12821	6.41732
	9.814	7.96107
	9.889	7.02289
	9.77221	8.74168
	10.348	8.81119
	9.73869	10.1927
	9.76202	7.03295
	9.47964	6.96153
	9.3457	7.05657
	10.6886	10.1587
	10.5506	8.8009
	9.30588	7.8681
	9.37195	9.4213
	10.1403	7.0116
	9.9941	8.87617
	9.1696	6.13101
	9.00064	10.0229
	9.81593	8.79002
	9.90391	9.38694
	9.72802	9.21436
	9.77695	8.42105
	9.80477	9.46101
	9.29388	8.14956
	9.46603	7.6216
	9.60069	7.42405
	9.26802	5.6179
	10.4483	8.24396
	9.8196	11.4537
	9.44359	7.86521
	10.0546	8.54177
	10.1131	7.6182
	10.3822	9.36657
	9.58395	9.19581
	9.90301	8.20736
	10.5053	8.94707
	8.91301	6.77574
	9.23484	7.18288
	9.85585	7.21722
	10.0978	7.89522
	8.85951	7.28772
	10.3228	9.12592
	9.63143	8.0372
	10.1989	9.9003
	9.41601	7.3065
	9.80365	11.3532
	10.2007	8.27269
	9.13243	5.08314
	9.95031	7.49619
	10.2551	10.0924
	9.90365	7.22779
	9.95502	11.1586
	9.89891	8.03862
	9.6505	8.98045
	10.3091	10.6419
	9.09602	8.66089
	9.56845	6.39863
	9.37271	8.33763
	9.50855	11.2687
	9.57649	7.46709
	9.18556	6.0134
	9.59616	7.4108
	10.123	8.30374
	9.67845	9.7567
	9.9785	6.49926
	9.9863	7.54866
	9.41723	7.61043
	9.79148	9.93995
	9.53882	9.77796
	9.71043	9.0415
	10.5668	9.00844
	9.95363	10.1639
	9.50051	8.16096
	9.62926	9.37984
	9.57597	8.653
	10.4074	6.75026
	9.73563	8.99953
	9.93375	7.57744
	9.84422	10.0046
	9.89959	8.47912
	9.31565	7.56577
	9.22461	6.45666
	9.53422	6.61799
	9.89173	9.66799
	9.37367	6.01801
	9.58452	10.9349
	9.68975	8.72268
	10.073	8.96285
	9.65204	8.10528
	8.98919	10.5612
	9.73514	8.82638
	8.85331	6.63717
	10.0866	7.67974
	9.32519	6.43769
	9.53155	5.93156
	9.49454	8.09726
	9.88212	4.80582
	9.52916	9.13615
	10.2923	9.78784
	9.65666	9.57028
	9.86952	10.2443
	9.49398	6.65029
	9.19032	8.73207
	9.82359	7.75216
	10.2984	9.38705
	9.63801	7.85744
	9.66498	8.01454
	9.62536	7.28513
	9.56919	7.22871
	9.50855	7.71548
	9.67695	8.07437
	9.23044	5.43237
	10.0719	9.06078
	10.1206	7.62653
	9.85175	7.78335
	9.14596	10.7429
	9.75169	9.06246
	9.59259	8.69585
	9.39429	7.43228
	9.49747	7.90782
	9.64619	7.71013
	9.30955	6.8303
	9.21092	6.19212
	9.56114	10.1057
	9.57764	7.26462
	10.0015	9.3791
	10.3572	10.4943
	9.45845	7.7297
	9.39016	5.89407
	9.93793	11.4461
	9.68272	9.24166
	9.92358	7.08863
	10.1372	9.02632
	9.16049	4.68546
	9.33761	8.21677
	9.43925	10.9449
	9.8337	8.24495
	10.1564	9.69582
	9.91071	8.79337
	9.73346	10.5617
	9.37989	7.17279
	9.33158	7.61074
	10.2995	10.0904
	9.37335	10.8584
	9.994	9.57716
	9.79516	6.97811
	9.69914	9.92428
	9.45399	7.22045
	9.09417	9.01665
	9.12266	7.63843
	9.25877	7.49759
	9.11551	7.54666
	9.88404	7.64206
	9.75226	11.2651
	9.6335	8.39291
	10.1602	8.45528
	10.2594	8.33309
	9.44981	6.78576
	9.74292	7.43266
	9.22291	9.56588
	10.1061	5.51177
	9.23637	7.30141
	10.2833	9.75943
	9.40884	7.36998
	9.55494	8.00281
	9.33688	7.09178
	10.1267	9.17442
	9.63986	9.05895
	9.95328	9.5534
	9.49036	7.84813
	9.35451	7.24996
	9.36478	7.14186
	9.99817	8.32518
	9.76951	8.88946
	9.53968	8.72042
	10.3219	9.6732
	10.1229	11.651
	10.1939	8.04207
	9.26873	9.01856
	9.84735	7.64025
	9.84902	11.6048
	9.56803	7.96655
	9.79458	9.14882
	9.97666	7.66832
	9.42791	8.65947
	9.33079	8.93395
	9.6592	8.69195
	9.32351	9.26752
	10.4282	9.75834
	9.57727	9.27066
	9.98045	10.1811
	9.95324	8.31967
	10.0721	8.36264
	9.52818	7.10686
	9.52948	11.4931
	9.40051	10.4105
	9.39951	7.22183
	9.38065	8.56582
	9.03509	7.07005
	10.0949	10.4535
	9.5146	8.07319
	10.4987	6.67762
	9.93977	10.4516
	10.0949	9.50527
	9.8622	9.01535
	9.58447	8.4907
	9.57976	7.48564
	10.3446	7.63904
	9.57935	6.9082
	8.92874	6.75173
	9.5954	6.68079
	10.2471	8.42658
	9.06901	4.88507
	9.23205	10.5466
	8.97259	7.56967
	9.81334	7.55329
	9.64624	7.69763
	9.23922	5.91469
	9.26291	6.53556
	9.51006	7.38455
	9.39191	8.81764
	9.22874	6.46846
	9.30335	6.79567
	10.1612	7.84838
	9.38387	7.24638
	9.98034	8.56402
	9.82404	7.6151
	10.157	10.0261
	10.193	8.45621
	9.69091	8.51334
	10.1964	7.48988
	10.3182	9.73807
	9.08154	9.65914
	9.84894	9.15083
	10.3615	7.78911
	9.55955	7.66419
	9.43925	5.63604
	9.63898	7.49829
	9.47038	9.129
	9.55754	9.42978
	9.83647	8.5299
	10.3093	9.42405
	9.24024	7.58259
	9.53946	6.44272
	9.39753	5.93988
	9.26084	7.78019
	10.1236	8.88754
	9.77831	9.5856
	10.0405	9.33892
	10.2119	9.19594
	9.61255	7.48635
	9.31814	6.37207
	9.19269	9.41084
	9.62084	9.26698
	10.4797	11.0386
	8.933	7.3826
	9.90425	8.49432
	10.0264	9.22379
	9.53514	8.43414
	9.53573	6.95073
	9.46399	8.13876
	9.67897	9.30133
	9.6604	9.18753
	9.92612	8.26331
	9.39566	8.05636
	9.98954	9.51957
	9.97627	10.3612
	9.3178	8.25072
	10.1686	7.95556
	9.96156	7.36241
	9.43566	5.57345
	9.87894	8.09284
	10.1068	7.54866
	10.4386	10.4562
	8.89847	5.06342
	9.85254	7.74537
	10.3494	9.37841
	9.3211	6.98046
	9.59131	9.64964
	10.072	9.02138
	9.90777	8.82647
	9.58416	10.1038
	10.1935	8.84134
	10.1706	8.44259
	9.85072	9.07422
	9.31037	8.89483
	10.2948	9.59082
	9.87671	8.42271
	10.3577	9.97455
	9.61506	7.71041
	9.63991	7.46312
	9.72842	7.54467
	9.47084	9.32828
	9.53622	6.94952
	9.73092	9.2218
	9.73185	8.20994
	9.67934	7.5674
	9.47677	8.30467
	9.27886	10.4317
	9.05605	10.234
	9.50956	8.20857
	9.68089	8.68845
	9.48553	7.05928
	9.62926	7.29715
	10.0831	9.64977
	9.35509	7.88958
	8.96313	10.505
	9.8427	8.01204
	9.38305	8.6207
	9.52314	5.10248
	10.0143	7.52379
	9.80787	9.86839
	9.63977	8.83851
	9.25806	8.04612
	9.76008	6.73839
	9.66607	8.69764
	9.66664	8.30436
	9.62313	7.4789
	9.77016	7.87794
	9.25067	10.2193
	9.93597	8.08044
	10.0768	7.76694
	9.06935	8.61031
	10.3131	11.4683
	9.8869	8.85221
	10.3973	10.0422
	9.78761	10.0364
	9.81334	10.9815
	9.6843	9.52974
	9.40687	6.72864
	10.1508	7.76534
	9.03697	7.29202
	9.47407	9.01871
	9.08	7.16356
	9.72012	9.39969
	10.0166	9.36737
	9.63864	9.75564
	9.37061	7.17375
	10.3194	8.56354
	9.94288	7.69218
	9.5643	7.10065
	9.40038	8.26509
	9.91053	7.67741
	9.89382	8.94404
	10.4754	10.609
	9.06459	10.7013
	9.66901	9.36802
	9.49358	8.58012
	10.1455	7.38651
	9.52506	9.84692
	9.47746	8.15663
	9.37303	7.73357
	9.58941	9.22392
	9.44537	8.52654
	9.95808	7.86545
	10.1336	9.3713
	10.0698	8.32105
	9.68715	8.95288
	9.17256	6.8664
	9.57758	8.42714
	9.81932	11.4625
	10.0768	8.65761
	9.76805	7.86617
	9.71252	8.83007
	9.44026	8.53027
	9.24677	8.05576
	9.65704	9.39116
	9.14524	6.17653
	9.15702	7.0881
	9.99043	8.88841
	10.045	9.41228
	10.0018	5.4129
	9.21346	7.51833
	9.51599	7.53361
	9.15409	8.04894
	9.69063	8.83677
	9.52248	7.08705
	10.0676	3.46979
	9.04355	9.12166
	10.2472	6.98104
	9.43284	6.29373
	10.4744	9.56993
	9.1804	7.75135
	9.55542	7.58355
	9.58292	7.2821
	9.94298	9.55237
	10.1518	8.61569
	9.7612	7.46312
	9.591	11.3675
	9.73519	8.00323
	9.40106	7.4199
	9.44282	9.4427
	9.52182	9.445
	9.65704	7.80155
	9.80779	7.59217
	9.9155	10.0049
	10.1416	10.2613
	10.0679	9.47319
	9.69221	9.37221
	9.87022	8.41925
	9.76293	5.46489
	9.40032	8.14463
	9.5954	9.33153
	10.3375	11.6892
	9.15599	7.67653
	10.2405	11.8192
	9.89181	9.11079
	10.1061	8.18654
	9.19116	10.6176
	9.96759	6.86245
	9.52199	8.99782
	9.17931	7.13737
	9.19291	3.93241
	9.90765	7.4624
	9.99909	7.16161
	9.56283	8.15663
	9.57091	8.27798
	9.28068	7.65109
	10.2369	8.1588
	9.72224	11.1093
	9.09012	10.453
	9.54763	7.74809
	10.0312	7.8777
	9.53941	11.2511
	10.4469	9.57401
	9.59647	7.91059
	9.59881	8.88179
	9.42477	4.41316
	8.84297	10.8713
	9.48854	8.71091
	9.72286	11.14
	9.6702	8.69195
	9.59039	7.545
	9.45005	7.83101
	10.2421	7.93907
	9.6557	9.21084
	9.54474	8.27461
	9.2485	8.14682
	9.75518	11.5209
	8.84933	7.1156
	9.80183	7.66241
	10.4045	8.76536
	9.86688	7.57712
	10.1062	10.1173
	9.99356	9.53161
	10.1879	7.5149
	9.3388	7.07859
	9.51194	8.60996
	10.0213	8.31537
	9.19299	7.15474
	9.25498	5.92147
	10.0887	8.45017
	9.67596	7.68814
	9.99469	10.2092
	9.84497	8.18881
	10.0296	9.13343
	10.194	9.84224
	9.46904	6.74804
	9.56756	8.86306
	9.57013	8.90377
	9.59698	7.34629
	9.95288	8.42493
	9.85887	9.31623
	10.266	8.68302
	9.39066	7.1156
	9.54608	8.90668
	9.33735	9.05432
	9.54211	8.37317
	10.0689	11.7486
	9.81178	6.96153
	9.68019	8.54509
	9.81466	9.62394
	9.46213	7.89921
	9.872	7.37906
	9.69003	7.42517
	9.93713	6.54285
	10.0801	8.61409
	9.91676	8.03475
	9.56404	8.75697
	9.00764	7.16161
	9.21838	6.03172
	9.47032	7.47212
	9.64186	6.95554
	9.26084	5.58534
	9.25498	7.42517
	9.34426	9.63739
	9.82473	9.87867
	10.0072	9.66343
	9.68696	9.56203
	10.0184	11.1757
	10.0198	7.6867
	9.98485	5.90615
	8.87189	6.44772
	10.0625	8.88545
	9.67337	8.65135
	9.76496	8.87362
	9.2163	6.07175
	9.28633	7.0116
	10.5479	8.78695
	9.52045	6.78005
	9.34949	7.42066
	10.0317	8.47466
	9.33847	7.36759
	9.20957	7.26902
	9.32712	7.31952
	10.0991	8.356
	9.98916	9.36834
	10.4371	9.92933
	10.3005	10.389
	9.38953	7.46673
	10.0707	9.50118
	9.85946	7.66034
	9.5643	10.4376
	9.9455	7.32742
	9.74112	8.83044
	9.68896	9.74241
	10.3152	9.0194
	9.4073	9.59914
	9.3604	9.01228
	9.47199	7.59566
	9.77028	7.9214
	9.69138	9.41701
	10.242	8.51562
	9.33112	7.8865
	9.63099	9.65252
	9.53844	10.7255
	9.94417	9.60029
	9.66882	7.60323
	9.70852	8.91746
	10.4598	9.78646
	9.34864	6.71039
	10.1228	8.43455
	9.04911	7.34751
	9.4408	9.10339
	10.1732	9.5473
	8.7873	7.35961
	10.0249	8.85131
	9.36651	7.20979
	9.98173	8.51068
	10.6165	9.20224
	9.7945	7.48175
	9.85088	9.6644
	9.52232	9.6522
	10.0959	9.30523
	9.83043	8.22389
	9.01515	4.84127
	9.26148	7.4248
	8.94501	7.64749
	9.70811	9.23344
	9.95851	7.93997
	10.1902	8.03087
	9.10348	7.10272
	9.88419	10.5469
	9.10872	6.0761
	9.93568	7.8013
	9.58246	8.90804
	9.63104	8.27894
	9.96615	7.51901
	9.97523	8.80336
	9.83558	7.88437
	9.55105	7.36481
	9.8468	7.11252
	10.4454	9.31464
	9.31578	10.8892
	9.49499	7.75459
	9.63869	9.36888
	9.46277	6.80479
	9.40607	8.73014
	9.28584	7.51525
	9.70038	8.87968
	9.82692	9.71498
	10.0238	8.71826
	9.70578	5.83691
	9.42003	7.90828
	9.51852	8.7466
	9.99393	10.7858
	9.45069	7.30311
	9.76444	8.93735
	9.69452	9.60731
	9.05184	8.0853
	9.11995	10.7302
	9.70285	7.31827
	9.22239	7.00362
	9.07761	7.15867
	10.2597	9.53138
	9.45164	8.16902
	10.0313	9.60332
	10.2423	11.9546
	10.7053	9.32901
	9.00451	7.31492
	10.3027	7.3124
	9.47303	8.27958
	10.0906	10.4561
	10.0556	9.25591
	9.89752	9.67834
	10.4813	10.5406
	9.08792	6.14461
	10.2617	9.6483
	9.87443	9.32655
	9.55175	7.18766
	9.22513	7.6736
	9.83975	9.09154
	9.73359	8.46938
	9.94827	8.17614
	9.7137	8.86627
	9.86734	9.01673
	9.40619	7.75189
	9.75287	7.58195
	9.39354	6.03172
	9.18009	6.44672
	9.35353	6.60016
	9.29938	6.73914
	10.0005	9.53006
	9.75618	8.57061
	10.0644	7.39001
	9.509	11.3738
	9.39354	7.76132
	9.74701	7.94824
	9.81715	8.14938
	9.83919	7.61417
	10.0842	11.3663
	9.24821	5.59942
	9.32385	7.10065
	9.17536	9.01558
	10.0376	9.16346
	9.94952	8.59142
	9.34688	7.8891
	10.0426	11.619
	10.0189	11.2592
	10.2096	8.34544
	9.24242	6.85052
	10.2531	9.64264
	9.54167	7.2808
	9.9245	11.4144
	10.0981	8.7473
	10.0283	9.3489
	9.56609	8.80355
	9.59177	7.79665
	9.45411	8.3979
	9.65064	8.61397
	10.2164	8.98756
	9.73908	6.99788
	9.29869	7.92687
	10.1548	8.28468
	10.0525	6.55905
	9.61285	9.26752
	9.36709	7.76907
	10.0736	11.401
	9.72255	6.60358
	9.35034	6.89233
	9.93923	10.1075
	10.367	7.7508
	9.58972	5.83691
	10.1334	8.94074
	9.06823	6.65922
	9.62625	9.57112
	9.93116	8.91
	10.2216	11.5329
	9.94244	9.99978
	9.97085	8.34723
	9.97481	7.84838
	9.1458	10.82
	10.2912	10.0728
	9.23674	8.47268
	9.85419	7.92732
	9.74451	7.22825
	9.47769	7.68612
	10.1609	8.40342
	9.45587	8.56894
	9.65891	10.5456
	9.87339	7.75567
	10.0218	7.94624
	9.87571	8.72186
	9.16262	6.20237
	9.57431	5.74856
	9.69531	10.7799
	9.29911	6.6957
	9.6303	6.95314
	9.89869	8.6812
	10.1777	8.06827
	9.86547	11.236
	9.92959	9.09522
	9.40434	9.62959
	9.83979	7.74236
	9.92034	9.01021
	10.4923	9.04083
	10.1912	9.91685
	9.91287	7.38924
	9.30588	7.98816
	9.74314	9.37521
	10.1716	11.7118
	9.55966	10.1471
	9.92487	8.9979
	9.6264	10.8269
	9.29353	7.00591
	10.1302	9.77259
	9.77546	8.50317
	9.20452	7.46745
	9.74955	7.99859
	9.79135	6.70885
	9.94244	11.508
	9.85187	6.98746
	9.45716	7.53462
	10.3084	7.51387
	10.1108	8.59783
	10.4796	8.78454
	9.87126	9.35388
	10.0221	7.58419
	10.3827	8.94814
	9.37342	5.42129
	9.8699	7.78046
	9.4299	8.25973
	9.50364	8.38042
	9.99043	9.82919
	9.47436	5.05139
	9.25699	7.25398
	9.77486	10.8818
	9.8784	6.71575
	9.60201	6.69959
	10.2435	8.26526
	8.99442	6.78076
	10.5102	9.39656
	10.0141	8.30061
	9.92648	9.74156
	9.76956	8.41409
	9.43506	8.80629
	10.218	9.64378
	9.46353	7.0582
	9.95897	9.06385
	9.09426	7.1503
	9.63879	8.55484
	10.0725	7.76159
	10.2385	11.2689
	9.89112	6.12827
	9.5543	8.37448
	9.92919	7.06091
	8.94452	7.75837
	9.75683	8.04874
	9.56372	7.45149
	9.68706	8.86893
	8.99423	6.98397
	10.0465	7.60511
	9.82396	7.47748
	9.29174	8.28134
	9.93397	8.63927
	9.16026	8.16598
	9.98547	11.486
	9.06094	7.12223
	9.5526	10.8663
	9.72806	7.15965
	9.94655	7.89123
	9.70281	8.82878
	9.88957	10.0966
	9.78272	10.1291
	10.0153	7.69877
	10.1362	9.8818
	9.81707	8.33127
	9.15805	7.43116
	10.6682	10.117
	9.92813	10.3716
	9.86932	10.8017
	9.45939	6.56617
	9.74235	7.24097
	9.15369	10.5252
	10.1568	9.47552
	9.59734	6.25092
	9.59978	7.07219
	9.55675	3.36661
	9.91572	6.46159
	9.44425	8.06094
	9.32579	6.32919
	9.08648	9.60187
	9.90709	10.8832
	9.26191	7.09909
	9.57133	8.13397
	9.55537	7.8808
	10.4617	10.3243
	9.94956	11.4065
	8.98187	8.65641
	9.93818	11.0333
	10.0729	9.65029
	9.97397	6.41423
	9.68295	8.69385
	9.46777	9.22386
	9.89559	6.85783
	9.89726	6.08331
	9.8431	8.61008
	9.5614	7.69016
	9.57904	8.41563
	10.5311	9.7801
	9.32499	8.16813
	9.17583	6.98921
	9.65199	8.57073
	9.18825	7.53865
	9.11171	7.20512
	10.5909	9.45595
	9.69831	8.48043
	9.62353	7.923
	10.4421	10.6006
	10.0635	8.71743
	9.09695	7.67653
	9.28591	8.41604
	9.52358	7.85451
	10.5664	9.68192
	9.11674	6.9734
	9.78149	9.20718
	9.79387	8.4396
	9.32103	7.79872
	9.76397	10.7634
	9.34111	7.0544
	9.89858	7.71576
	9.83895	9.65119
	9.50499	8.75944
	9.15551	6.96153
	9.18871	6.47819
	9.7023	5.78213
	10.2617	6.79002
	9.30962	5.07923
	9.556	7.99456
	9.20618	7.50212
	10.0469	8.0779
	10.3008	9.55438
	9.78411	7.7388
	9.70143	11.2081
	9.98696	9.72986
	9.07838	6.86047
	9.68342	9.06879
	10.3821	9.21424
	9.25282	9.17612
	9.80017	7.82951
	9.02765	6.82416
	10.7288	12.4766
	9.57649	8.68813
	9.61646	8.7527
	10.0689	8.04531
	9.5932	8.25712
	9.57232	8.97185
	9.34222	7.42367
	10.0351	7.9529
	9.97187	10.4361
	9.52976	7.47641
	9.13486	6.85318
	9.7723	9.37627
	9.25741	6.9176
	9.2582	8.3902
	9.93959	9.03551
	9.19566	8.70602
	10.0198	10.2459
	10.0288	8.27333
	9.53155	9.21078
	9.21592	7.72024
	10.0541	6.98221
	9.2009	7.35519
	10.1237	10.6026
	10.3469	9.94628
	10.1585	11.5169
	9.52747	9.88386
	9.67072	11.2224
	9.17598	7.7366
	9.70038	8.52404
	8.88152	7.17085
	9.46458	7.84592
	9.65546	8.56546
	8.84955	9.89774
	9.84338	7.69534
	9.25605	7.81639
	9.32184	7.04236
	9.15496	8.31814
	9.84585	10.9394
	9.76401	8.98243
	9.89257	8.19004
	9.94057	7.61944
	10.3807	9.62831
	9.89055	6.66083
	9.90309	8.07221
	10.4373	10.02
	9.71687	9.74496
	10.0126	7.27033
	9.88461	6.76272
	9.22838	5.76648
	9.54399	6.97163
	10.0614	8.96059
	9.5249	8.38518
	9.19581	10.4914
	9.79692	7.09961
	10.061	7.99115
	9.31328	10.7331
	9.95563	9.86679
	9.44951	8.04874
	10.0437	6.85185
	10.0018	9.33665
	9.86423	9.80391
	9.29863	6.75907
	9.70359	9.25591
	9.93295	7.35519
	9.74951	7.89499
	10.2782	9.83316
	9.83474	9.51721
	9.71266	8.6258
	9.25942	10.1639
	10.1846	8.73421
	9.77088	7.95467
	9.77737	7.76614
	9.64919	7.6151
	9.78942	6.51057
	9.63688	6.92691
	9.82582	8.05115
	9.86446	8.03066
	10.1707	7.58099
	10.0712	8.96808
	9.5177	8.32013
	9.70948	11.243
	9.27346	6.11443
	8.97989	9.92819
	9.57867	9.06443
	9.99841	8.39889
	9.64793	8.90608
	9.414	7.17809
	9.70597	8.46541
	9.79558	8.16204
	10.0229	8.6739
	9.63094	7.48104
	9.80733	8.77806
	10.2905	8.85212
	9.41601	6.72789
	9.85183	8.65958
	9.79921	8.65586
	9.56761	9.4452
	9.07323	7.10995
	9.06987	8.65146
	9.59228	8.58825
	9.75374	9.02001
	9.54619	10.1669
	10.2459	10.0592
	9.9263	8.65388
	9.39933	7.00534
	9.95854	8.73573
	10.1931	9.72851
	9.68808	9.11121
	9.49843	9.77567
	10.1405	8.62636
	9.60545	7.89944
	9.07787	6.23376
	9.05553	7.40315
	9.79704	10.974
	9.93444	8.06926
	9.90967	8.11851
	10.0134	8.68962
	9.69499	8.474
	9.49623	9.32744
	10.1639	9.56402
	10.5705	7.24007
	9.34564	6.21379
	9.58225	8.53585
	10.3169	9.06428
	9.73882	9.61633
	9.78107	7.07326
	9.72896	8.61008
	9.45552	11.2564
	9.15337	5.83507
	9.56193	10.7933
	9.41308	9.33013
	9.34045	10.6959
	9.64201	11.0245
	9.22919	6.73165
	8.92884	6.02565
	10.2453	8.25745
	9.40915	9.82215
	9.23476	7.14733
	9.76599	6.8775
	9.91813	7.96414
	10.1025	7.18145
	10.2146	9.04396
	9.58199	9.297
	9.29588	8.40652
	10.0584	8.09072
	9.61335	7.4423
	9.79654	7.02402
	9.6384	7.2821
	8.89168	5.79179
	9.9684	9.89039
	9.6177	9.84945
	9.27078	6.98804
	9.68766	6.98746
	9.34544	6.84985
	9.67671	6.56617
	10.0222	7.39506
	8.99172	7.37473
	8.96782	10.1671
	10.0883	7.9348
	9.57987	7.83226
	9.56546	9.71129
	10.0038	7.27033
	9.77375	7.61572
	10.2455	8.01912
	9.17931	7.40928
	9.56235	8.81156
	9.81104	11.6487
	9.45663	7.63265
	9.92082	9.37419
	9.89503	8.16813
	9.66469	8.03393
	9.20127	6.3558
	9.4296	8.0135
	9.72797	6.64211
	9.50163	7.26374
	9.82457	9.65862
	10.4394	9.76777
	9.85522	7.10892
	9.59223	8.02222
	9.84055	9.72986
	9.16388	10.5898
	9.60029	8.79786
	9.92292	9.43074
	9.32358	6.95374
	9.5199	8.24578
	9.9521	8.74369
	10.4356	8.96091
	10.3768	8.30964
[truncated: 7,519 more rows]

## Sheet: Fig-3C-Growth dist
	Growth rate of microcolonies (h-1)
	WT
	HI	M1	M2	LO
	0.226	0.373	0.376	0.321
	0.419	0.359	0.401	0.371
	0.204	0.361	0.438	0.4
	0.236	0.362	0.425	0.419
	0.208	0.39	0.237	0.41
	0.216	0.354	0.399	0.402
	0.146	0.345	0.343	0.383
	0.258	0.38	0.424	0.401
	0.212	0.371	0.276	0.347
	0.271	0.406	0.471	0.433
	0.181	0.429	0.348	0.233
	0.26	0.358	0.389	0.326
	0.361	0.25	0.384	0.382
	0.185	0.374	0.402	0.391
	0.429	0.403	0.326	0.354
	0.205	0.361	0.385	0.408
	0.289	0.411	0.271	0.431
	0.229	0.418	0.39	0.411
	0.37	0.406	0.433	0.433
	0.17	0.329	0.387	0.4
	0.439	0.38	0.39	0.429
	0.307	0.412	0.409	0.388
	0.281	0.396	0.39	0.446
	0.218	0.301	0.369	0.396
	0.211	0.377	0.36	0.365
	0.263	0.407	0.361	0.414
	0.35	0.348	0.396	0.47
	0.217	0.421	0.412	0.372
	0.293	0.476	0.359	0.393
	0.198	0.338	0.379	0.391
	0.176	0.385	0.407	0.429
	0.231	0.37	0.346	0.412
	0.148	0.392	0.364	0.415
	0.235	0.1	0.406	0.38
	0.249	0.444	0.388	0.438
	0.174	0.433	0.404	0.384
	0.379	0.387	0.414	0.506
	0.27	0.371	0.161	0.434
	0.127	0.356	0.466	0.487
	0.167	0.378	0.424	0.197
	0.419	0.477	0.352	0.39
	0.29	0.374	0.394	0.388
	0.204	0.414	0.412	0.389
	0.222	0.393	0.404	0.383
	0.24	0.354	0.357	0.397
	0.18	0.427	0.409	0.42
	0.402	0.388	0.404	0.432
	0.3	0.428	0.447	0.461
	0.151	0.368	0.405	0.38
	0.187	0.281	0.265	0.413
	0.23	0.432	0.44	0.378
	0.409	0.393	0.436	0.454
	0.209	0.404	0.343	0.431
	0.412	0.389	0.369	0.406
	0.233	0.427	0.355	0.387
	0.282	0.43	0.364	0.379
	0.248	0.402	0.447	0.415
	0.096	0.361	0.392	0.434
	0.246	0.342	0.382	0.451
	0.316	0.474	0.362	0.45
	0.164	0.447	0.363	0.341
	0.204	0.402	0.429	0.441
	0.304	0.378	0.338	0.416
	0.167	0.403	0.442	0.458
	0.188	0.393	0.391	0.419
	0.153	0.412	0.415	0.403
	0.269	0.48	0.379	0.123
	0.289	0.448	0.355	0.401
	0.326	0.405	0.293	0.305
	0.171	0.4	0.372	0.416
	0.386	0.401	0.364	0.413
	0.253	0.486	0.427	0.351
	0.343	0.359	0.388	0.491
	0.448	0.453	0.379	0.393
	0.369	0.3	0.399	0.393
	0.327	0.328	0.431	0.231
	0.151	0.4	0.392	0.433
	0.267	0.401	0.242	0.42
	0.277	0.332	0.363	0.487
	0.215	0.452	0.204	0.466
	0.128	0.187	0.386	0.377
	0.158	0.451	0.411	0.359
	0.263	0.419	0.333	0.416
	0.198	0.375	0.376	0.4
	0.177	0.432	0.42	0.365
	0.386	0.476	0.402	0.354
	0.153	0.42	0.391	0.273
	0.191	0.415	0.476	0.445
	0.263	0.39	0.199	0.471
	0.245	0.382	0.391	0.37
	0.378	0.445	0.327	0.491
	0.175	0.495	0.404	0.474
	0.366	0.435	0.416	0.359
	0.189	0.373	0.456	0.494
	0.184	0.406	0.374	0.372
	0.315	0.477	0.424	0.423
	0.329	0.426	0.385	0.417
	0.233	0.366	0.315	0.254
	0.243	0.368	0.354	0.431
	0.239	0.382	0.382	0.449
	0.251	0.442	0.323	0.355
	0.237	0.442	0.419	0.449
	0.28	0.473	0.412	0.396
	0.215	0.451	0.432	0.392
	0.422	0.388	0.344	0.375
	0.308	0.423	0.346	0.34
	0.367	0.247	0.345	0.328
	0.381	0.372	0.365	0.366
	0.205	0.435	0.34	0.379
	0.271	0.431	0.337	0.391
	0.364	0.43	0.369	0.427
	0.391	0.389	0.405	0.408
	0.251	0.391	0.348	0.415
	0.358	0.366	0.373	0.29
	0.35	0.389	0.405	0.353
	0.213	0.356	0.415	0.396
	0.243	0.372	0.426	0.394
	0.163	0.388	0.381	0.386
	0.321	0.459	0.315	0.36
	0.157	0.399	0.267	0.372
	0.24	0.397	0.361	0.281
	0.185	0.429	0.379	0.354
	0.334	0.372	0.332	0.414
	0.255	0.426	0.454	0.4
	0.253	0.262	0.416	0.324
	0.242	0.367	0.391	0.429
	0.273	0.448	0.347	0.422
	0.421	0.452	0.198	0.326
	0.447	0.41	0.433	0.413
	0.322	0.441	0.254	0.398
	0.336	0.387	0.338	0.354
	0.2	0.395	0.254	0.404
	0.14	0.313	0.396	0.388
	0.324	0.189	0.414	0.347
	0.371	0.368	0.405	0.38
	0.217	0.382	0.436	0.246
	0.134	0.369	0.388	0.399
	0.315	0.342	0.446	0.401
	0.239	0.388	0.132	0.365
	0.239	0.404	0.384	0.399
	0.183	0.421	0.352	0.379
	0.367	0.395	0.37	0.402
	0.437	0.39	0.4	0.41
	0.176	0.32	0.407	0.375
	0.1	0.447	0.376	0.416
	0.231	0.302	0.375	0.421
	0.369	0.376	0.272	0.406
	0.182	0.386	0.434	0.26
	0.209	0.387	0.391	0.426
	0.196	0.412	0.391	0.366
	0.334	0.365	0.382	0.382
	0.257	0.445	0.368	0.412
	0.269	0.386	0.38	0.409
	0.24	0.369	0.376	0.35
	0.307	0.406	0.4	0.344
	0.392	0.183	0.332	0.438
	0.194	0.375	0.194	0.347
	0.238	0.456	0.377	0.384
	0.32	0.452	0.221	0.396
	0.334	0.393	0.279	0.429
	0.371	0.404	0.293	0.433
	0.164	0.386	0.399	0.335
	0.239	0.459	0.378	0.421
	0.098	0.448	0.212	0.32
	0.155	0.305	0.422	0.34
	0.3	0.426	0.421	0.429
	0.368	0.342	0.392	0.37
	0.301	0.285	0.405	0.393
	0.253	0.461	0.443	0.47
	0.236	0.493	0.417	0.402
	0.205	0.409	0.458	0.322
	0.29	0.375	0.268	0.361
	0.156	0.352	0.369	0.373
	0.213	0.393	0.361	0.441
	0.152	0.403	0.483	0.425
	0.173	0.267	0.345	0.401
	0.132	0.372	0.389	0.373
	0.179	0.338	0.401	0.343
	0.177	0.439	0.428	0.239
	0.37	0.402	0.352	0.379
	0.188	0.374	0.295	0.372
	0.423	0.471	0.289	0.385
	0.442	0.206	0.352	0.379
	0.272	0.409	0.4	0.427
	0.312	0.273	0.38	0.412
	0.183	0.391	0.362	0.358
	0.26	0.391	0.466	0.365
	0.279	0.393	0.351	0.373
	0.241	0.384	0.381	0.363
	0.209	0.439	0.336	0.416
	0.244	0.338	0.217	0.349
	0.149	0.433	0.414	0.366
	0.118	0.452	0.383	0.369
	0.243	0.399	0.203	0.373
	0.395	0.442	0.405	0.365
	0.317	0.405	0.281	0.372
	0.153	0.397	0.394	0.338
	0.156	0.415	0.3	0.406
	0.303	0.403	0.355	0.359
	0.2	0.406	0.432	0.392
	0.182	0.313	0.238	0.289
	0.244	0.42	0.371	0.458
	0.313	0.441	0.352	0.457
	0.365	0.439	0.378	0.408
	0.32	0.408	0.402	0.34
	0.204	0.363	0.339	0.433
	0.226	0.393	0.385	0.379
	0.314	0.373	0.407	0.375
	0.24	0.442	0.369	0.396
	0.249	0.401	0.378	0.412
	0.129	0.379	0.382	0.377
	0.228	0.363	0.474	0.377
	0.175	0.431	0.39	0.415
	0.379	0.406	0.491	0.35
	0.444	0.389	0.383	0.366
	0.158	0.376	0.376	0.206
	0.103	0.436	0.343	0.34
	0.154	0.384	0.365	0.394
	0.122	0.384	0.425	0.328
	0.202	0.341	0.412	0.411
	0.225	0.404	0.369	0.365
	0.266	0.412	0.351	0.436
	0.202	0.43	0.2	0.424
	0.237	0.373	0.414	0.393
	0.303	0.357	0.397	0.411
	0.293	0.403	0.376	0.404
	0.269	0.387	0.369	0.397
	0.268	0.448	0.201	0.393
	0.222	0.421	0.364	0.327
	0.175	0.406	0.342	0.393
	0.201	0.415	0.264	0.213
	0.206	0.389	0.393	0.209
	0.383	0.369	0.373	0.376
	0.285	0.42	0.416	0.394
	0.197	0.353	0.174	0.397
	0.276	0.361	0.369	0.373
	0.177	0.419	0.338	0.476
	0.155	0.386	0.38	0.384
	0.22	0.391	0.363	0.416
	0.299	0.462	0.447	0.237
	0.347	0.368	0.369	0.389
	0.101	0.404	0.402	0.427
	0.235	0.398	0.417	0.33
	0.164	0.417	0.347	0.472
	0.266	0.404	0.328	0.393
	0.297	0.435	0.398	0.398
	0.309	0.347	0.352	0.362
	0.3	0.401	0.394	0.32
	0.203	0.377	0.208	0.318
	0.287	0.444	0.339	0.304
	0.152	0.375	0.331	0.378
	0.176	0.449	0.44	0.308
	0.193	0.368	0.433	0.424
	0.446	0.392	0.274	0.409
	0.186	0.38	0.375	0.403
	0.37	0.405	0.387	0.499
	0.341	0.329	0.236	0.426
	0.182	0.357	0.404	0.357
	0.136	0.426	0.36	0.379
	0.182	0.418	0.339	0.325
	0.24	0.444	0.266	0.342
	0.232	0.303	0.371	0.354
	0.346	0.291	0.362	0.332
	0.089	0.402	0.415	0.451
	0.275	0.398	0.411	0.379
	0.2	0.366	0.393	0.427
	0.183	0.366	0.422	0.238
	0.176	0.407	0.401	0.376
	0.293	0.367	0.41	0.426
	0.065	0.364	0.375	0.338
	0.375	0.389	0.4	0.397
	0.258	0.357	0.368	0.469
	0.142	0.417	0.434	0.258
	0.379	0.485	0.411	0.359
	0.338	0.37	0.395	0.388
	0.204	0.414	0.393	0.315
	0.37	0.398	0.397	0.375
	0.24	0.445	0.382	0.403
	0.163	0.432	0.406	0.401
	0.226	0.372	0.336	0.352
	0.264	0.448	0.389	0.487
	0.194	0.267	0.334	0.451
	0.189	0.426	0.388	0.46
	0.391	0.399	0.444	0.431
	0.181	0.432	0.379	0.411
	0.293	0.423	0.405	0.391
	0.39	0.405	0.425	0.441
	0.185	0.281	0.319	0.42
	0.251	0.34	0.428	0.432
	0.411	0.432	0.4	0.471
	0.215	0.439	0.368	0.473
	0.432	0.446	0.379	0.409
	0.177	0.4	0.395	0.348
	0.353	0.496	0.401	0.43
	0.209	0.439	0.35	0.372
	0.384	0.44	0.314	0.364
	0.273	0.4	0.371	0.332
	0.124	0.414	0.383	0.483
	0.231	0.453	0.345	0.383
	0.218	0.245	0.374	0.445
	0.237	0.5	0.432	0.487
	0.202	0.391	0.352	0.439
	0.108	0.408	0.388	0.414
	0.179	0.504	0.34	0.479
	0.204	0.445	0.382	0.376
	0.246	0.426	0.312	0.398
	0.209	0.333	0.405	0.386
	0.418	0.377	0.376	0.235
	0.393	0.39	0.395	0.387
	0.344	0.429	0.386	0.398
	0.233	0.405	0.378	0.362
	0.171	0.382	0.369	0.295
	0.21	0.386	0.392	0.108
	0.261	0.376	0.415	0.468
	0.198	0.361	0.363	0.408
	0.225	0.386	0.386	0.405
	0.226	0.212	0.376	0.416
	0.36	0.422	0.411	0.417
	0.186	0.46	0.393	0.382
	0.197	0.442	0.397	0.417
	0.39	0.403	0.394	0.432
	0.224	0.334	0.415	0.388
	0.359	0.379	0.395	0.448
	0.122	0.355	0.429	0.295
	0.293	0.359	0.403	0.455
	0.169	0.5	0.403	0.391
	0.238	0.228	0.423	0.418
	0.276	0.403	0.398	0.383
	0.264	0.367	0.396	0.418
	0.35	0.374	0.484	0.403
	0.185	0.112	0.405	0.414
	0.282	0.426	0.404	0.36
	0.196	0.467	0.422	0.37
	0.266	0.449	0.404	0.403
	0.316	0.45	0.384	0.339
	0.147	0.42	0.324	0.419
	0.251	0.37	0.402	0.368
	0.24	0.392	0.429	0.445
	0.29	0.347	0.512	0.434
	0.201	0.405	0.431	0.442
	0.196	0.391	0.444	0.286
	0.277	0.376	0.406	0.417
	0.223	0.386	0.399	0.439
	0.323	0.389	0.429	0.368
	0.325	0.418	0.383	0.365
	0.374	0.437	0.364	0.463
	0.218	0.204	0.395	0.378
	0.443	0.339	0.429	0.377
	0.193	0.411	0.439	0.113
	0.233	0.199	0.277	0.4
	0.162	0.38	0.366	0.317
	0.231	0.374	0.393	0.399
	0.238	0.402	0.437	0.459
	0.208	0.453	0.408	0.318
	0.102	0.362	0.393	0.451
	0.384	0.354	0.419	0.351
	0.283	0.361	0.396	0.407
	0.159	0.401	0.443	0.433
	0.249	0.408	0.406	0.443
	0.236	0.373	0.468	0.412
	0.236	0.347	0.385	0.395
	0.271	0.377	0.358	0.422
	0.384	0.353	0.397	0.431
	0.28	0.401	0.136	0.407
	0.352	0.451	0.448	0.464
	0.202	0.401	0.218	0.397
	0.459	0.299	0.363	0.344
	0.201	0.347	0.328	0.447
	0.177	0.405	0.454	0.365
	0.2	0.388	0.377	0.382
	0.434	0.374	0.426	0.397
	0.332	0.204	0.167	0.359
	0.211	0.382	0.395	0.407
	0.208	0.424	0.403	0.44
	0.216	0.422	0.365	0.286
	0.113	0.344	0.4	0.44
	0.166	0.442	0.379	0.365
	0.215	0.369	0.388	0.282
	0.208	0.368	0.374	0.359
	0.293	0.426	0.388	0.428
	0.276	0.428	0.487	0.367
	0.201	0.403	0.461	0.336
	0.231	0.148	0.393	0.307
	0.363	0.407	0.372	0.292
	0.243	0.404	0.379	0.321
	0.128	0.399	0.411	0.413
	0.155	0.378	0.4	0.392
	0.301	0.3	0.406	0.38
	0.266	0.417	0.435	0.358
	0.074	0.318	0.405	0.461
	0.331	0.425	0.429	0.22
	0.236	0.372	0.381	0.381
	0.253	0.383	0.435	0.397
	0.251	0.444	0.364	0.425
	0.176	0.498	0.403	0.487
	0.212	0.36	0.373	0.447
	0.177	0.423	0.382	0.26
	0.238	0.264	0.327	0.446
	0.153	0.402	0.403	0.368
	0.303	0.375	0.401	0.421
	0.27	0.215	0.377	0.418
	0.44	0.376	0.243	0.393
	0.225	0.357	0.394	0.415
	0.138	0.401	0.363	0.374
	0.244	0.234	0.41	0.384
	0.213	0.434	0.26	0.416
	0.115	0.477	0.365	0.392
	0.203	0.437	0.456	0.419
	0.245	0.251	0.339	0.406
	0.413	0.419	0.417	0.317
	0.139	0.411	0.343	0.405
	0.226	0.403	0.442	0.34
	0.446	0.366	0.301	0.457
	0.219	0.36	0.38	0.383
	0.076	0.483	0.236	0.42
	0.303	0.418	0.351	0.45
	0.393	0.371	0.405	0.368
	0.157	0.411	0.385	0.173
	0.099	0.419	0.403	0.412
	0.383	0.372	0.244	0.376
	0.128	0.379	0.385	0.429
	0.351	0.431	0.478	0.551
	0.251	0.393	0.431	0.404
	0.209	0.419	0.491	0.206
	0.191	0.378	0.381	0.489
	0.208	0.425	0.424	0.138
	0.257	0.392	0.444	0.399
	0.345	0.346	0.373	0.433
	0.218	0.426	0.399	0.408
	0.231	0.382	0.402	0.375
	0.194	0.389	0.366	0.451
	0.325	0.393	0.37	0.375
	0.23	0.447	0.343	0.398
	0.076	0.465	0.395	0.469
	0.395	0.496	0.414	0.491
	0.243	0.397	0.414	0.286
	0.278	0.375	0.395	0.37
	0.115	0.433	0.375	0.398
	0.356	0.371	0.383	0.365
	0.292	0.293	0.407	0.259
	0.255	0.405	0.396	0.407
	0.176	0.359	0.404	0.466
	0.372	0.383	0.244	0.385
	0.378	0.445	0.391	0.285
	0.055	0.344	0.44	0.19
	0.409	0.335	0.393	0.19
	0.38	0.43	0.378	0.206
	0.099	0.403	0.4	0.096
	0.245	0.386	0.415	0.373
	0.216	0.419	0.445	0.225
	0.373	0.412	0.408	0.111
	0.39	0.412	0.419	0.227
	0.32	0.448	0.354	0.29
	0.181	0.376	0.472	0.187
	0.217	0.412	0.43	0.207
	0.301	0.359	0.432	0.239
	0.165	0.382	0.396	0.301
	0.126	0.354	0.367	0.306
	0.405	0.378	0.35	0.273
	0.191	0.372	0.401	0.213
	0.131	0.427	0.366	0.449
	0.256	0.365	0.414	0.426
	0.194	0.424	0.392	0.453
	0.114	0.386	0.392	0.36
	0.081	0.425	0.363	0.281
	0.225	0.386	0.382	0.434
	0.132	0.394	0.34	0.451
	0.147	0.385	0.399	0.429
	0.264	0.386	0.368	0.398
	0.123	0.465	0.393	0.385
	0.116	0.466	0.441	0.42
	0.179	0.398	0.397	0.462
	0.192	0.431	0.419	0.38
	0.153	0.368	0.371	0.449
	0.268	0.383	0.392	0.389
	0.265	0.442	0.428	0.234
	0.298	0.41	0.384	0.435
	0.224	0.353	0.408	0.457
	0.422	0.386	0.4	0.399
	0.154	0.387	0.4	0.481
	0.314	0.25	0.41	0.287
	0.287	0.404	0.416	0.449
	0.112	0.364	0.282	0.403
	0.2	0.368	0.366	0.426
	0.242	0.373	0.405	0.334
	0.315	0.426	0.423	0.45
	0.14	0.142	0.321	0.381
	0.179	0.355	0.405	0.413
	0.327	0.374	0.382	0.379
	0.151	0.382	0.25	0.32
	0.341	0.378	0.373	0.402
	0.281	0.372	0.398	0.475
	0.221	0.386	0.444	0.415
	0.29	0.383	0.382	0.414
	0.377	0.386	0.34	0.401
	0.173	0.38	0.351	0.298
	0.061	0.296	0.363	0.408
	0.166	0.427	0.163	0.413
	0.317	0.497	0.368	0.375
	0.337	0.432	0.39	0.378
	0.156	0.393	0.381	0.387
	0.189	0.367	0.457	0.257
	0.267	0.332	0.241	0.182
	0.113	0.36	0.391	0.416
	0.137	0.427	0.416	0.446
	0.098	0.398	0.4	0.398
	0.267	0.378	0.422	0.153
	0.069	0.372	0.436	0.413
	0.173	0.391	0.423	0.297
	0.241	0.396	0.355	0.383
	0.321	0.362	0.367	0.38
	0.111	0.382	0.421	0.412
	0.178	0.389	0.434	0.388
	0.412	0.338	0.463	0.408
	0.233	0.402	0.363	0.441
	0.169	0.453	0.464	0.469
	0.222	0.403	0.202	0.281
	0.263	0.402	0.402	0.505
	0.204	0.399	0.395	0.303
	0.291	0.399	0.512	0.413
	0.168	0.415	0.454	0.232
	0.067	0.31	0.39	0.354
	0.315	0.396	0.453	0.434
	0.208	0.174	0.514	0.465
	0.408	0.428	0.368	0.406
	0.44	0.339	0.47	0.368
	0.236	0.453	0.438	0.427
	0.122	0.409	0.295	0.406
	0.114	0.424	0.403	0.391
	0.163	0.425	0.372	0.431
	0.261	0.493	0.405	0.415
	0.233	0.383	0.242	0.484
	0.175	0.305	0.377	0.464
	0.189	0.395	0.367	0.418
	0.36	0.387	0.438	0.374
	0.354	0.427	0.434	0.428
	0.2	0.424	0.425	0.423
	0.139	0.483	0.377	0.235
	0.316	0.377	0.356	0.367
	0.186	0.345	0.357	0.31
	0.352	0.311	0.371	0.358
	0.243	0.402	0.452	0.391
	0.079	0.367	0.316	0.412
	0.39	0.33	0.413	0.375
	0.425	0.399	0.382	0.366
	0.343	0.405	0.268	0.402
	0.359	0.525	0.427	0.381
	0.164	0.338	0.247	0.454
	0.055	0.38	0.404	0.345
	0.315	0.379	0.389	0.416
	0.206	0.463	0.409	0.397
	0.268	0.424	0.39	0.407
	0.193	0.31	0.401	0.434
	0.146	0.349	0.377	0.383
	0.265	0.318	0.399	0.368
	0.3	0.368	0.297	0.359
	0.289	0.418	0.288	0.52
	0.427	0.396	0.355	0.387
	0.125	0.404	0.369	0.305
	0.289	0.345	0.457	0.319
	0.382	0.352	0.375	0.352
	0.191	0.323	0.406	0.409
	0.38	0.322	0.363	0.409
	0.376	0.34	0.347	0.42
	0.444	0.395	0.379	0.359
	0.261	0.377	0.377	0.399
	0.342	0.396	0.454	0.382
	0.123	0.406	0.375	0.329
	0.272	0.393	0.367	0.321
	0.228	0.388	0.395	0.392
	0.456	0.378	0.388	0.357
	0.294	0.393	0.392	0.355
	0.31	0.361	0.369	0.416
	0.226	0.445	0.371	0.37
	0.201	0.41	0.337	0.233
	0.24	0.385	0.387	0.43
	0.287	0.38	0.395	0.411
	0.207	0.415	0.366	0.406
	0.23	0.359	0.394	0.424
	0.262	0.426	0.363	0.388
	0.369	0.369	0.398	0.344
	0.224	0.383	0.399	0.367
	0.368	0.403	0.411	0.406
	0.388	0.357	0.399	0.374
	0.222	0.445	0.424	0.439
	0.223	0.418	0.427	0.433
	0.197	0.417	0.416	0.387
	0.353	0.391	0.219	0.382
	0.233	0.42	0.41	0.456
	0.188	0.414	0.383	0.415
	0.243	0.375	0.385	0.422
	0.19	0.397	0.388	0.349
	0.213	0.385	0.439	0.493
	0.219	0.401	0.35	0.273
	0.277	0.435	0.458	0.435
	0.29	0.363	0.367	0.418
	0.182	0.387	0.374	0.423
	0.234	0.354	0.369	0.286
	0.128	0.406	0.366	0.412
	0.257	0.375	0.441	0.475
	0.204	0.392	0.377	0.423
	0.239	0.443	0.388	0.445
	0.325	0.349	0.41	0.395
	0.402	0.369	0.409	0.428
	0.32	0.39	0.387	0.372
	0.305	0.383	0.389	0.367
	0.122	0.326	0.369	0.123
	0.26	0.379	0.39	0.448
	0.348	0.349	0.261	0.509
	0.139	0.41	0.376	0.419
	0.249	0.394	0.375	0.441
	0.227	0.401	0.363	0.403
	0.238	0.385	0.386	0.4
	0.239	0.34	0.362	0.421
	0.254	0.372	0.378	0.38
	0.172	0.384	0.371	0.466
	0.221	0.431	0.395	0.412
	0.19	0.344	0.448	0.433
	0.184	0.537	0.377	0.367
	0.252	0.369	0.383	0.377
	0.165	0.43	0.288	0.402
	0.127	0.374	0.361	0.397
	0.158	0.434	0.435	0.228
	0.131	0.392	0.409	0.4
	0.305	0.424	0.353	0.403
	0.151	0.385	0.357	0.436
	0.151	0.251	0.211	0.41
	0.255	0.527	0.387	0.365
	0.32	0.408	0.348	0.38
	0.193	0.426	0.343	0.496
	0.157	0.393	0.421	0.422
	0.125	0.389	0.399	0.468
	0.256	0.435	0.399	0.391
	0.222	0.381	0.4	0.398
	0.288	0.338	0.329	0.493
	0.183	0.436	0.188	0.294
	0.19	0.374	0.453	0.396
	0.302	0.434	0.397	0.408
	0.364	0.419	0.402	0.405
	0.166	0.411	0.396	0.303
	0.382	0.405	0.414	0.561
	0.385	0.367	0.415	0.427
	0.324	0.363	0.339	0.392
	0.366	0.407	0.374	0.401
	0.211	0.256	0.372	0.392
	0.267	0.243	0.422	0.399
	0.078	0.178	0.463	0.266
	0.295	0.369	0.409	0.329
	0.24	0.369	0.373	0.449
	0.228	0.358	0.401	0.398
	0.16	0.289	0.418	0.394
	0.161	0.276	0.383	0.369
	0.16	0.355	0.395	0.453
	0.261	0.201	0.255	0.37
	0.324	0.329	0.354	0.403
	0.197	0.31	0.41	0.412
	0.344	0.178	0.457	0.379
	0.211	0.284	0.454	0.364
	0.205	0.243	0.384	0.381
	0.274	0.342	0.439	0.328
	0.214	0.286	0.368	0.424
	0.192	0.406	0.403	0.378
	0.198	0.531	0.277	0.395
	0.244	0.394	0.338	0.356
	0.175	0.384	0.274	0.357
	0.207	0.345	0.389	0.379
	0.229	0.416	0.372	0.477
	0.247	0.355	0.428	0.392
	0.403	0.417	0.266	0.412
	0.137	0.464	0.338	0.413
	0.289	0.386	0.375	0.379
	0.225	0.367	0.352	0.407
	0.146	0.204	0.388	0.352
	0.392	0.408	0.412	0.42
	0.241	0.393	0.456	0.365
	0.338	0.424	0.401	0.415
	0.183	0.423	0.387	0.411
	0.413	0.38	0.416	0.424
	0.261	0.381	0.451	0.38
	0.285	0.397	0.373	0.393
	0.169	0.422	0.29	0.453
	0.156	0.366	0.38	0.374
	0.264	0.407	0.428	0.367
	0.307	0.267	0.298	0.421
	0.349	0.402	0.435	0.384
	0.273	0.373	0.29	0.134
	0.18	0.327	0.346	0.394
	0.222	0.302	0.426	0.436
	0.256	0.362	0.362	0.35
	0.175	0.423	0.414	0.372
	0.251	0.281	0.401	0.382
	0.115	0.351	0.446	0.409
	0.355	0.361	0.415	0.245
	0.416	0.409	0.22	0.379
	0.154	0.384	0.34	0.412
	0.379	0.395	0.419	0.407
	0.163	0.328	0.271	0.362
	0.406	0.344	0.394	0.289
	0.149	0.407	0.38	0.324
	0.4	0.39	0.302	0.381
	0.18	0.441	0.354	0.403
	0.254	0.419	0.389	0.406
	0.156	0.334	0.453	0.367
	0.205	0.374	0.431	0.159
	0.351	0.414	0.387	0.396
	0.388	0.351	0.399	0.419
	0.294	0.387	0.403	0.298
	0.23	0.361	0.393	0.413
	0.201	0.368	0.367	0.353
	0.194	0.423	0.384	0.397
	0.28	0.38	0.428	0.398
	0.153	0.388	0.399	0.441
	0.157	0.383	0.304	0.391
	0.253	0.311	0.399	0.434
	0.291	0.388	0.359	0.421
	0.191	0.368	0.415	0.432
	0.253	0.374	0.42	0.387
	0.23	0.382	0.308	0.405
	0.179	0.417	0.356	0.424
	0.223	0.35	0.394	0.437
	0.286	0.386	0.357	0.344
	0.167	0.334	0.279	0.44
	0.097	0.416	0.385	0.392
	0.415	0.351	0.437	0.432
	0.182	0.43	0.292	0.453
	0.187	0.392	0.375	0.504
	0.243	0.362	0.347	0.436
	0.219	0.388	0.436	0.203
	0.191	0.417	0.433	0.423
	0.19	0.417	0.444	0.34
	0.227	0.363	0.378	0.293
	0.166	0.445	0.398	0.432
	0.15	0.33	0.36	0.353
	0.191	0.365	0.415	0.372
	0.125	0.407	0.371	0.435
	0.187	0.407	0.377	0.216
	0.207	0.489	0.427	0.422
	0.204	0.368	0.287	0.388
	0.164	0.321	0.518	0.524
	0.321	0.133	0.4	0.401
	0.163	0.44	0.393	0.368
	0.2	0.465	0.356	0.356
	0.274	0.382	0.385	0.317
	0.231	0.384	0.351	0.454
	0.265	0.394	0.413	0.345
	0.279	0.416	0.373	0.391
	0.204	0.422	0.432	0.403
	0.287	0.411	0.43	0.37
	0.378	0.366	0.363	0.457
	0.402	0.418	0.339	0.435
	0.267	0.384	0.401	0.396
	0.24	0.438	0.394	0.299
	0.237	0.223	0.367	0.295
	0.17	0.358	0.327	0.214
	0.179	0.384	0.444	0.392
	0.262	0.398	0.416	0.393
	0.349	0.359	0.405	0.223
	0.189	0.382	0.358	0.378
	0.38	0.371	0.387	0.362
	0.222	0.342	0.241	0.418
	0.286	0.335	0.416	0.34
	0.351	0.375	0.347	0.422
	0.253	0.426	0.382	0.423
	0.26	0.376	0.362	0.379
	0.379	0.363	0.377	0.39
	0.364	0.465	0.382	0.276
	0.264	0.28	0.422	0.222
	0.365	0.325	0.27	0.329
	0.244	0.391	0.361	0.319
	0.185	0.498	0.433	0.393
	0.165	0.414	0.31	0.431
	0.287	0.377	0.389	0.395
	0.207	0.465	0.358	0.427
	0.28	0.375	0.324	0.399
	0.198	0.39	0.367	0.368
	0.322	0.379	0.379	0.38
	0.215	0.451	0.363	0.415
	0.34	0.416	0.37	0.445
	0.317	0.389	0.374	0.404
	0.226	0.406	0.316	0.355
	0.166	0.427	0.39	0.457
	0.238	0.358	0.401	0.37
	0.278	0.392	0.369	0.405
	0.279	0.446	0.407	0.397
	0.188	0.45	0.393	0.409
	0.243	0.381	0.402	0.355
	0.188	0.114	0.397	0.481
	0.236	0.379	0.39	0.386
	0.102	0.286	0.365	0.347
	0.258	0.44	0.227	0.411
	0.214	0.257	0.342	0.41
	0.173	0.412	0.371	0.417
	0.248	0.366	0.406	0.408
	0.301	0.407	0.366	0.367
	0.221	0.334	0.386	0.177
	0.264	0.383	0.402	0.415
	0.231	0.375	0.411	0.471
	0.17	0.448	0.293	0.377
	0.158	0.345	0.375	0.361
	0.235	0.389	0.334	0.412
	0.328	0.347	0.369	0.454
	0.245	0.352	0.41	0.394
	0.231	0.417	0.34	0.38
	0.289	0.398	0.413	0.372
	0.27	0.422	0.399	0.357
	0.2	0.478	0.403	0.48
	0.098	0.406	0.389	0.473
	0.366	0.458	0.371	0.436
	0.208	0.273	0.394	0.366
	0.319	0.44	0.404	0.345
	0.358	0.458	0.371	0.37
	0.299	0.37	0.399	0.422
	0.214	0.409	0.373	0.396
	0.16	0.361	0.435	0.366
	0.235	0.36	0.437	0.358
	0.196	0.354	0.403	0.385
	0.171	0.41	0.331	0.405
	0.182	0.398	0.264	0.338
	0.301	0.447	0.358	0.381
	0.165	0.383	0.366	0.211
	0.374	0.424	0.406	0.371
	0.365	0.38	0.428	0.41
	0.174	0.426	0.388	0.371
	0.3	0.313	0.384	0.393
	0.281	0.42	0.409	0.43
	0.233	0.401	0.448	0.459
	0.264	0.434	0.369	0.39
	0.166	0.222	0.373	0.335
	0.291	0.4	0.428	0.379
	0.365	0.364	0.4	0.368
	0.259	0.35	0.396	0.372
	0.375	0.395	0.337	0.406
	0.305	0.404	0.336	0.39
	0.2	0.415	0.334	0.344
	0.107	0.406	0.444	0.38
	0.276	0.414	0.438	0.406
	0.14	0.241	0.414	0.459
	0.216	0.377	0.392	0.383
	0.163	0.394	0.406	0.404
	0.206	0.08	0.424	0.433
	0.217	0.27	0.386	0.439
	0.354	0.452	0.434	0.487
	0.385	0.4	0.355	0.358
	0.152	0.339	0.395	0.411
	0.247	0.461	0.396	0.387
	0.231	0.458	0.438	0.398
	0.285	0.394	0.396	0.486
	0.17	0.447	0.38	0.396
	0.344	0.427	0.421	0.417
	0.104	0.4	0.363	0.467
	0.257	0.379	0.336	0.357
	0.307	0.416	0.491	0.398
	0.281	0.346	0.458	0.434
	0.155	0.42	0.407	0.402
	0.187	0.451	0.376	0.424
	0.2	0.455	0.337	0.37
	0.228	0.521	0.414	0.432
	0.219	0.426	0.364	0.403
	0.175	0.419	0.408	0.37
	0.232	0.429	0.373	0.356
	0.182	0.386	0.174	0.412
	0.246	0.269	0.394	0.393
	0.29	0.48	0.393	0.349
	0.155	0.18	0.413	0.391
	0.228	0.478	0.198	0.439
	0.408	0.426	0.378	0.389
	0.185	0.449	0.476	0.472
	0.236	0.448	0.397	0.413
	0.236	0.394	0.394	0.439
	0.21	0.417	0.369	0.402
	0.238	0.343	0.428	0.391
	0.169	0.379	0.359	0.336
	0.275	0.413	0.35	0.464
	0.28	0.422	0.439	0.44
	0.323	0.46	0.344	0.449
	0.229	0.399	0.42	0.365
	0.403	0.414	0.445	0.413
	0.341	0.351	0.414	0.438
	0.216	0.42	0.301	0.45
	0.294	0.372	0.363	0.161
	0.273	0.381	0.367	0.389
	0.16	0.347	0.367	0.378
	0.228	0.41	0.405	0.455
	0.151	0.39	0.459	0.425
	0.337	0.207	0.391	0.383
	0.378	0.392	0.385	0.287
	0.186	0.377	0.391	0.378
	0.23	0.388	0.334	0.397
	0.405	0.375	0.391	0.363
	0.164	0.445	0.254	0.378
	0.241	0.173	0.397	0.348
	0.273	0.219	0.374	0.387
	0.347	0.349	0.394	0.38
	0.193	0.42	0.377	0.43
	0.243	0.411	0.42	0.384
	0.212	0.418	0.4	0.207
	0.143	0.401	0.39	0.485
	0.394	0.451	0.359	0.416
	0.165	0.407	0.396	0.428
	0.25	0.401	0.381	0.318
	0.227	0.422	0.392	0.37
	0.235	0.266	0.371	0.445
	0.154	0.473	0.455	0.142
	0.419	0.398	0.405	0.375
	0.189	0.382	0.412	0.45
	0.187	0.324	0.36	0.386
	0.164	0.279	0.381	0.318
	0.302	0.415	0.369	0.241
	0.368	0.389	0.242	0.247
	0.22	0.113	0.36	0.367
	0.247	0.29	0.409	0.373
	0.382	0.296	0.407	0.375
	0.216	0.385	0.419	0.473
	0.187	0.425	0.37	0.368
	0.269	0.344	0.363	0.333
	0.179	0.389	0.341	0.365
	0.148	0.409	0.4	0.328
	0.182	0.113	0.388	0.395
	0.279	0.403	0.409	0.373
	0.172	0.366	0.398	0.418
	0.308	0.359	0.264	0.222
	0.216	0.401	0.34	0.374
	0.195	0.401	0.395	0.372
	0.265	0.456	0.396	0.387
	0.364	0.401	0.36	0.285
	0.197	0.421	0.364	0.413
	0.288	0.455	0.39	0.422
	0.216	0.369	0.417	0.336
	0.38	0.401	0.235	0.404
	0.194	0.421	0.403	0.427
	0.256	0.4	0.405	0.414
	0.304	0.394	0.431	0.201
	0.141	0.354	0.323	0.436
	0.198	0.437	0.378	0.386
	0.195	0.4	0.396	0.419
	0.187	0.444	0.387	0.338
	0.308	0.347	0.377	0.384
	0.306	0.306	0.449	0.417
	0.351	0.409	0.425	0.399
	0.193	0.402	0.382	0.359
	0.357	0.365	0.369	0.437
	0.123	0.277	0.328	0.365
	0.207	0.384	0.394	0.355
	0.171	0.396	0.372	0.394
	0.183	0.355	0.352	0.439
	0.182	0.479	0.398	0.395
	0.189	0.286	0.413	0.423
	0.212	0.512	0.428	0.382
	0.29	0.418	0.38	0.333
	0.183	0.366	0.44	0.222
	0.181	0.226	0.405	0.413
	0.174	0.167	0.397	0.413
	0.142	0.439	0.37	0.36
	0.137	0.424	0.367	0.3
	0.233	0.392	0.136	0.386
	0.34	0.364	0.416	0.413
	0.155	0.357	0.449	0.431
	0.229	0.4	0.415	0.4
	0.284	0.42	0.36	0.394
	0.091	0.324	0.369	0.397
	0.214	0.345	0.408	0.277
	0.16	0.358	0.387	0.388
	0.328	0.414	0.359	0.36
	0.231	0.407	0.463	0.316
	0.084	0.447	0.453	0.392
	0.201	0.391	0.35	0.495
	0.38	0.365	0.441	0.365
	0.367	0.392	0.371	0.385
	0.356	0.4	0.391	0.486
	0.18	0.441	0.291	0.229
	0.278	0.43	0.439	0.295
	0.236	0.409	0.314	0.43
	0.234	0.472	0.38	0.158
	0.201	0.39	0.379	0.393
	0.495	0.371	0.358	0.411
	0.296	0.451	0.438	0.405
	0.187	0.349	0.489	0.454
	0.147	0.439	0.415	0.446
	0.268	0.422	0.359	0.389
	0.222	0.381	0.375	0.381
	0.31	0.265	0.444	0.351
	0.336	0.388	0.376	0.43
	0.231	0.482	0.21	0.279
	0.355	0.451	0.274	0.449
	0.303	0.387	0.423	0.432
	0.183	0.427	0.413	0.402
	0.223	0.411	0.363	0.384
	0.204	0.414	0.434	0.427
	0.169	0.434	0.361	0.431
	0.301	0.256	0.453	0.461
	0.215	0.432	0.407	0.417
	0.36	0.445	0.393	0.376
	0.164	0.442	0.37	0.376
	0.393	0.376	0.352	0.403
	0.242	0.444	0.442	0.351
	0.197	0.388	0.38	0.397
	0.281	0.385	0.402	0.411
	0.171	0.366	0.438	0.402
	0.321	0.39	0.385	0.426
	0.249	0.405	0.43	0.389
	0.079	0.371	0.388	0.349
	0.265	0.357	0.414	0.412
	0.143	0.373	0.325	0.453
	0.239	0.379	0.325	0.383
	0.068	0.403	0.459	0.39
	0.23	0.422	0.403	0.42
	0.285	0.415	0.46	0.43
	0.103	0.372	0.318	0.348
	0.243	0.394	0.407	0.408
	0.115	0.397	0.417	0.394
	0.246	0.424	0.437	0.35
	0.454	0.418	0.373	0.581
	0.26	0.403	0.351	0.509
	0.336	0.375	0.297	0.362
	0.218	0.423	0.361	0.298
	0.442	0.361	0.366	0.423
	0.238	0.329	0.377	0.442
	0.43	0.236	0.396	0.384
	0.178	0.451	0.358	0.417
	0.243	0.367	0.378	0.406
	0.128	0.456	0.401	0.398
	0.426	0.288	0.355	0.404
	0.232	0.517	0.377	0.435
	0.091	0.427	0.427	0.487
	0.146	0.465	0.227	0.271
	0.094	0.458	0.23	0.27
	0.083	0.452	0.417	0.421
	0.217	0.389	0.378	0.447
	0.429	0.386	0.332	0.434
	0.221	0.396	0.378	0.432
	0.463	0.364	0.113	0.459
	0.219	0.376	0.38	0.323
	0.195	0.388	0.371	0.464
	0.254	0.364	0.432	0.432
	0.289	0.323	0.44	0.45
	0.393	0.374	0.335	0.406
	0.114	0.393	0.368	0.394
	0.244	0.409	0.372	0.469
	0.179	0.242	0.359	0.508
	0.17	0.42	0.422	0.397
	0.188	0.399	0.342	0.485
	0.157	0.433		0.354
	0.248	0.393		0.381
	0.371	0.353		0.41
	0.336	0.432		0.462
	0.275	0.394		0.476
	0.206	0.356		0.496
	0.159	0.286		0.291
	0.19	0.389		0.393
	0.24	0.428		0.419
	0.226	0.272		0.517
	0.329	0.435		0.435
	0.227	0.406		0.45
	0.209	0.413		0.483
	0.305	0.433		0.457
	0.386	0.365		0.467
	0.232	0.419		0.467
	0.286	0.376		0.439
	0.19	0.411		0.46
	0.311	0.377		0.437
	0.286	0.406		0.469
	0.36	0.315		0.352
	0.168	0.43		0.354
	0.194	0.386		0.373
	0.2	0.417		0.433
	0.183	0.406		0.408
	0.162	0.398		0.398
	0.305	0.416		0.435
	0.309	0.336		0.409
	0.211	0.372		0.351
	0.216	0.364		0.362
	0.238	0.398		0.39
	0.138	0.38		0.265
	0.384	0.383		0.405
	0.17	0.391		0.419
	0.206	0.449		0.375
	0.307	0.371		0.355
	0.223	0.351		0.364
	0.362	0.389		0.329
	0.22	0.401		0.422
	0.171	0.413		0.339
	0.192	0.352		0.405
	0.333	0.389		0.354
	0.323	0.451		0.376
	0.389	0.396		0.364
	0.211	0.42		0.397
	0.143	0.453		0.398
	0.351	0.396		0.366
	0.21	0.396		0.412
	0.144	0.379		0.379
	0.235	0.402
	0.158	0.389
	0.207	0.407
	0.275	0.342
	0.128	0.395
	0.252	0.438
	0.312	0.364
	0.274	0.414
	0.238	0.398
	0.347	0.347
	0.092	0.359
	0.191	0.377
	0.26	0.469
	0.233	0.388
	0.201	0.303
	0.2	0.352
	0.401	0.425
	0.246	0.418
	0.323	0.452
	0.255	0.247
	0.241	0.406
	0.188	0.405
	0.123	0.393
	0.221	0.277
	0.19	0.379
	0.189	0.378
	0.166	0.416
	0.156	0.425
	0.267	0.39
	0.124	0.405
	0.264	0.375
	0.204	0.419
	0.305	0.476
	0.234	0.375
	0.148	0.282
	0.299	0.39
	0.276	0.427
	0.166	0.444
	0.247	0.302
	0.288	0.443
	0.272	0.404
	0.192	0.385
	0.13	0.389
	0.168	0.393
	0.131	0.425
	0.243	0.413
	0.201	0.478
	0.176	0.397
	0.297	0.293
	0.142	0.393
	0.26	0.445
	0.362	0.415
	0.194	0.352
	0.339	0.473
	0.131	0.309
	0.119	0.416
	0.138	0.394
	0.209	0.379
	0.264	0.416
	0.22	0.41
	0.238	0.403
	0.396	0.371
	0.205	0.371
	0.2	0.399
	0.184	0.342
	0.223	0.359
	0.255	0.362
	0.121	0.445
	0.215	0.402
	0.18	0.397
	0.204	0.362
	0.387	0.403
	0.142	0.38
	0.164	0.442
	0.163	0.285
	0.121	0.394
	0.103	0.381
	0.228	0.307
	0.119	0.449
	0.239	0.21
	0.4	0.415
	0.215	0.416
	0.142	0.417
	0.239	0.429
	0.122	0.513
	0.214	0.394
	0.152	0.321
	0.345	0.335
	0.351	0.421
	0.246	0.189
	0.266	0.296
	0.239	0.435
	0.222	0.246
	0.179	0.439
	0.138	0.451
	0.153	0.461
	0.223	0.39
	0.283	0.253
	0.181	0.373
	0.21	0.353
	0.143	0.295
	0.315	0.418
	0.263	0.327
	0.435	0.419
	0.25	0.435
	0.306	0.239
	0.339	0.452
	0.134	0.417
	0.218	0.408
	0.214	0.432
	0.239	0.359
	0.21	0.241
	0.154	0.393
	0.211	0.405
	0.289	0.363
	0.206	0.472
	0.434	0.45
	0.236	0.418
	0.481	0.425
	0.241	0.43
	0.222	0.379
	0.141	0.418
	0.087	0.436
	0.458	0.305
	0.501	0.448
	0.212	0.481
	0.237	0.444
	0.238	0.396
	0.271	0.149
	0.223	0.447
	0.186	0.366
	0.109	0.4
	0.226	0.263
	0.239	0.32
	0.28	0.433
	0.226	0.415
	0.182	0.382
	0.261	0.42
	0.237	0.413
	0.25	0.414
	0.156	0.406
	0.153	0.298
	0.292	0.411
	0.347	0.397
	0.196	0.109
	0.406	0.386
	0.222	0.429
	0.193	0.392
	0.214	0.404
	0.233	0.356
	0.139	0.388
	0.231	0.377
	0.2	0.415
	0.12	0.399
	0.317	0.446
	0.285	0.43
	0.161	0.388
	0.227	0.398
	0.196	0.412
	0.268	0.416
	0.215	0.396
	0.252	0.365
	0.373	0.429
	0.2	0.394
	0.421	0.375
	0.198	0.328
	0.425	0.39
	0.209	0.321
	0.208	0.422
	0.289	0.343
	0.337	0.216
	0.09	0.381
	0.226	0.38
	0.123	0.372
	0.227	0.464
	0.254
	0.128
	0.383
	0.41
	0.156
	0.376
	0.165
	0.351
	0.15
	0.155
	0.166
	0.192
	0.377
	0.252
	0.174
	0.194
	0.167

## Sheet: Fig-3D
		Mean			Stdev
		% respiration			% respiration
	bin	deficient	%slow fraction		deficient	%slow fraction
	HI	83.0825	78.8817		8.40727	6.64692
	M1	1.29223	6.92		0.699552	1.49063
	M2	1.09059	7.50542		0.416172	2.52404
	LO	0.721115	8.26375		0.383595	4.36079

## Sheet: Fig-3E
	% Slow fraction vs % respiration deficient in WT and mutant strains
		Average	Average		Stdev	Stdev
	Strain	%Slow_fraction	%Resp_deficient		%Slow_fraction	%Resp_deficient
	WT	8.84375	9.10876		2.77935	2.17943
	atp10	21.5386	25.7932		4.17122	0.454635
	atp17	50.995	100		1.9799	0
	atp20	60.4121	69.57		16.6187	NA
	atp22	71.4077	100		7.79865	0
	atp23	22.4893	30.9972		3.15062	0.357558
	cce1	87.9275	93.6508		2.12412	NA
	cox13	10.015	12.1951		1.72188	NA
	cox23	9.7515	100		0.242538	0
	cox7	9.7825	100		3.3896	0
	cox9	10.9358	100		1.11964	0
	csm3	6.19	4.02409		1.81019	0.433624
	hhf1	7.56687	2.07504		1.45133	0.775443
	hog1	7.48733	6.7524		2.79269	0.30611
	mdm38	25.1621	29.18		3.90568	2.43085
	mig1	16.3559	17.0611		3.70602	0.0293391
	mrc1	6.61962	4.11075		1.92337	0.891842
	pub1	17.441	22.097		1.99963	1.78709
	sml1	6.415	6.36551		0.205061	0.10777
	tim11	52.8594	70.9587		13.4548	3.35824
	tof1	8.215	4.03659		1.23744	0.245978

## Sheet: Fig-3F
	% Slow fraction vs % respiration deficient in UCC strains
		Average	Average		Stdev	Stdev
	Strain	%Slow_fraction	%Resp_deficient		%Slow_fraction	%Resp_deficient
	ucc8240	11.3862	10.7661		2.80084	3.4164
	ucc8241	19.1837	18.7589		3.09217	2.95882
	ucc8335	11.7525	13.6512		4.22691	0.948116
	ucc8338	8.09875	6.68458		2.29503	1.42514
	ucc8356	17.5269	25.0423		3.68369	4.12196
	ucc8357	6.975	4.07949		2.44894	0.626673
	ucc8358	14.2681	18.6137		3.25249	2.15687
	ucc8359	5.6425	3.82464		1.82694	2.52805
	ucc8360	7.22	6.42593		2.40431	1.3597
	ucc8361	7.03063	1.9947		3.02466	1.33852
	ucc8362	11.9556	8.40736		6.29113	1.0358
	ucc8363	4.26562	1.90349		2.24427	2.32243
