# Supplementary material for: Single cell functional genomics reveals the importance of mitochondria in cell-to-cell phenotypic variation
Source: eLife journal article supplement (doi:10.7554/elife.38904), 2019-01-14
Supplement: supp [file elife-38904-supp-v1.zip › elife_poa_e38904_Figure_4_source_data_1.xlsx]

## Sheet: Fig-4A
	WT strain
			mtDNA relative to bin LO
		Mean			Stdev
		mtDNA			mtDNA
		Replicate 1	Replicate 2		Replicate 1	Replicate 2
	HI	0.26846	0.345451		0.0989187	0.174203
	M1	0.634187	0.779028		0.104868	0.138069
	M2	0.732307	0.890832		0.12169	0.160214

## Sheet: Fig-4B
		mtDNA relative to WT
			Average		Stdev
		Strain	mtDNA		mtDNA
		WT+pRS413	1.25942		0.37335
		WT+pRS413+MIP1	3.04999		1.12355

## Sheet: Fig-4C-respiration_deficient
			Mean		Stdev
			% respiraiton		% respiraiton
		Strain/Construct	deficient		deficient
		WT	9.10876		2.17943
		WT+pRS413	8.77942		1.5307
		WT+pRS413+MIP1	5.71876		1.4649

## Sheet: Fig-4C-slow_fraction
			Mean		Stdev
		Strain/Construct	% Slow fraction		% Slow fraction
		WT	9.48667		2.37795
		WT+pRS413	8.4675		2.42106
		WT+pRS413+MIP1	5.67		0.712721

## Sheet: Fig-4C-tim11_mutant
		MIP1 overexpression in tim11Δ mutant
			Average	Stdev
			%Slow fraction	%Slow fraction
		tim11Δ	52.8594	13.4548
		tim11Δ+pRS413	58.5712	16.2005
		tim11Δ+pRS413+MIP1	39.625	8.09034

## Sheet: Fig-4D
	BY4741-pRS413				BY4741-pRS413+MIP1
	loge(Cell size) (a.u.)	loge(TMRE) (a.u.)			loge(Cell size) (a.u.)	loge(TMRE) (a.u.)
	9.35824	4.03954			9.05663	4.21951
	9.69498	4.53903			8.79556	6.72287
	8.99743	3.10906			9.20074	3.64806
	9.12886	5.66018			8.79284	8.0749
	8.78603	7.89028			8.87346	8.51286
	8.73779	6.04784			9.34765	7.09804
	8.32779	6.28413			8.69096	5.15213
	8.65272	5.33754			8.82488	6.30481
	8.97784	6.2691			9.14269	4.01096
	8.85638	6.87441			9.29141	5.69306
	8.40837	4.74667			9.08028	4.4682
	8.93557	5.41165			8.68929	7.53818
	8.60629	6.15867			8.61802	7.18296
	8.83242	4.55598			8.96016	6.30481
	9.01726	7.5101			9.84423	8.32303
	9.0378	6.1347			9.48193	4.90676
	8.8194	3.90399			9.19974	4.09434
	8.85062	6.6995			8.96032	5.70111
	9.21781	7.96304			9.22822	6.98841
	8.55282	6.04595			9.43243	6.53843
	9.19692	5.78321			9.29603	5.67675
	9.77003	7.13377			9.3092	7.20638
	9.05829	3.88773			9.00034	7.32066
	8.68259	6.72479			8.39192	5.54518
	8.78708	5.99346			8.81747	7.01463
	8.86026	5.32982			9.25294	3.3322
	8.88785	5.81711			8.70483	6.16877
	8.79697	7.31108			8.87485	7.4313
	8.9102	6.06843			8.712	6.12949
	9.18019	6.82958			8.51216	4.6747
	8.97415	5.15213			9.70784	7.74518
	8.91162	5.57595			8.89875	4.62104
	8.69377	5.93171			8.87762	5.0186
	8.61555	7.32489			8.90626	4.96424
	9.187	5.66296			8.85346	6.26606
	8.5503	5.16593			8.97282	7.22286
	8.8643	5.40448			9.05569	6.55222
	8.79716	5.86817			9.44088	7.10201
	8.73918	0.470004			9.10923	3.38777
	9.23259	6.10479			9.20792	6.03069
	9.47081	7.37676			8.89646	5.73786
	8.83837	4.08092			8.62772	5.79301
	8.69988	3.17805			8.6245	4.8331
	8.4796	7.77014			8.96951	5.95894
	9.06849	6.13988			9.05337	4.09434
	8.91196	6.42972			8.77143	4.54754
	8.82242	3.80221			8.88279	6.76435
	8.87006	6.78083			8.55771	4.28772
	8.63392	7.13823			8.97721	6.58369
	8.89374	5.82895			8.76118	6.96979
	9.30807	7.231			9.78898	7.62657
	9.15095	6.5692			9.03692	7.93537
	9.02684	6.96678			8.61498	4.96424
	8.82816	4.37198			9.0727	3.66868
	8.99551	5.81711			9.0085	4.93015
	9.00804	3.85439			8.935	5.14283
	9.14627	4.61314			8.95681	6.22733
	9.6094	6.8552			8.65887	5.93171
	9.09312	5.00797			8.49595	7.2685
	8.80416	6.93459			9.2248	3.17805
	9.14223	5.89715			8.85346	2.91235
	8.70658	5.60874			9.15226	4.63667
	8.6918	6.04406			9.08542	5.85908
	8.84742	4.8828			9.00264	5.28219
	8.87189	3.41444			8.96508	2.82138
	8.8363	5.62906			9.31659	4.43082
	8.95497	4.1957			8.87207	8.01381
	9.00226	8.01988			8.55246	6.47512
	8.65185	5.26992			8.69823	3.8712
	8.69294	7.15524			8.82004	5.23644
	8.85567	4.42125			8.60208	4.01096
	9.06074	8.61134			9.01583	5.11919
	8.81848	5.38266			9.18191	4.78749
	8.83684	5.69306			9.13195	5.41876
	8.79603	5.9548			8.48653	4.58904
	8.93956	4.96981			9.3034	5.04986
	9.08049	4.1463			8.36081	4.02535
	8.53836	5.12396			8.99336	5.77082
	8.06326	2.82138			9.21781	7.82883
	8.78309	5.50044			9.23035	4.84576
	8.75073	6.96602			9.04434	5.76582
	8.93525	4.59714			8.65304	4.99179
	9.09542	6.39959			8.70996	5.48397
	8.8917	6.22575			9.29192	5.14749
	9.15134	5.88388			9.49372	5.92104
	9.21757	5.73269			9.35084	4.87672
	8.96199	4.83945			9.18064	7.3385
	8.974	4.97535			9.44619	8.68122
	8.78528	4.85826			8.5521	5.0133
	9.10834	6.86359			8.38289	5.0186
	8.96365	5.5999			9.02981	4.29865
	9.03662	5.0186			8.767	6.32651
	8.35936	3.8373			8.79076	3.88773
	9.03456	5.0133			8.63271	3.49043
	9.26564	6.35888			8.90819	5.37157
	8.78944	6.50189			9.16025	2.34181
	9.01628	1.72277			9.04016	4.94164
	8.5175	6.79436			9.23948	5.84296
	8.44875	6.13988			9.41343	4.39198
	8.84062	5.588			8.93369	6.34914
	8.43525	7.2922			9.19943	4.20767
	8.6579	5.35281			8.69252	6.6291
	8.59258	6.25843			9.11886	7.78389
	8.89875	6.70147			9.09584	8.15525
	9.8178	6.71514			8.91662	6.34493
	8.73759	3.90399			9.2678	3.95124
	8.88141	7.08272			8.96151	7.00307
	9.12549	8.66658			8.96087	5.14283
	8.76118	4.29865			9.39649	4.95301
	8.97815	6.30628			9.26311	7.12158
	8.87701	5.55141			9.06978	5.0133
	8.65542	-0.223144			8.81747	7.21759
	9.26891	6.5748			9.10937	6.50668
	8.88725	5.45361			9.57907	7.94676
	9.18954	3.99636			8.70329	4.02535
	8.51502	4.29865			8.91137	5.28624
	8.83441	3.66868			9.09723	5.48728
	8.67054	3.96651			9.11695	7.39117
	8.7466	8.10507			9.15502	7.03456
	8.93386	6.35333			8.67647	7.80401
	9.38739	5.86363			9.46999	7.09672
	9.16513	6.86192			9.05395	5.26579
	8.63403	7.08339			9.06096	8.16326
	8.49696	4.48639			8.69065	4.18358
	9.01666	6.42584			9.34949	6.34493
	8.67319	2.82138			8.3722	4.57265
	9.58147	7.74552			8.49608	5.86817
	9.30886	6.19032			8.89442	4.88884
	8.31375	7.16827			8.90794	7.06919
	8.69398	8.10168			8.92226	6.66237
	9.12387	4.66721			8.82205	6.0249
	9.18019	5.91025			8.46429	6.37809
	9.29665	6.76619			9.24638	5.29832
	9.10964	7.02749			8.81628	7.5973
	8.56708	5.50696			8.36356	2.17475
	8.81435	5.7275			9.16402	4.30946
	8.91762	7.00887			9.6059	6.68761
	8.84804	4.91852			8.80062	7.76506
	9.08331	6.40092			8.58496	2.41591
	8.98392	6.50069			8.82434	7.21876
	8.99973	5.2575			8.85018	4.76046
	9.08507	4.93591			9.07908	6.99062
	9.51529	6.42843			8.51552	5.48397
	8.72578	5.17953			9.15947	6.06099
	8.839	8.04482			9.496	5.61167
	8.95128	6.84247			8.92028	5.7275
	9.29026	7.24594			9.1393	3.85439
	8.94329	6.81652			8.88614	6.06099
	8.41622	4.56435			9.26851	7.37976
	8.8664	5.09498			8.52884	4.09434
	9.27032	6.12425			9.11211	6.46272
	9.18198	7.46118			8.91579	8.2578
	8.78812	7.90397			8.77441	5.78321
	9.07077	5.55141			8.81112	4.54754
	8.61036	5.51665			8.7179	4.28772
	8.7746	5.17953			9.69384	6.54074
	8.87623	6.65312			8.78148	2.7213
	8.72629	5.57897			8.95457	3.70868
	8.64555	4.10759			9.07689	7.06783
	8.74413	5.92319			9.01846	5.37898
	8.68322	8.26277			9.05345	4.49536
	8.68929	6.79705			9.07348	8.46901
	9.24698	5.34138			8.7934	6.43101
	8.78641	6.78717			9.23574	6.92991
	9.03182	6.374			8.84875	6.12074
	8.65348	6.23048			8.77795	5.00797
	9.25128	7.72241			9.19055	7.05755
	8.88279	5.04471			8.76921	6.44508
	8.88029	3.98155			9.55762	5.87718
	8.92268	8.23938			9.12164	7.41023
	9.20779	7.23562			8.95777	6.68461
	9.06348	7.57456			8.66188	5.70378
	9.36134	6.90776			9.85284	7.14267
	9.08613	6.62592			8.76516	6.18703
	8.4981	5.61167			9.00834	4.37198
	9.13436	6.25996			9.5415	7.36315
	9.00963	5.83364			8.68343	7.98942
	9.34413	5.5102			8.84599	6.80506
	8.54284	3.80221			9.44432	4.58088
	9.2245	5.41521			8.86806	3.58352
	8.97329	4.12066			9.32148	6.42972
	9.26287	5.54518			8.74156	5.37898
	8.76041	4.58088			8.86482	6.45394
	8.87952	7.10003			9.01122	6.55564
	9.04595	6.94312			9.45146	7.19684
	8.9368	3.81991			8.94467	4.98086
	8.87563	4.58088			8.50025	4.39198
	9.19786	5.39726			8.77172	6.40886
	9.03115	5.80994			8.89067	6.08495
	9.05808	6.26302			9.47057	8.78691
	8.6637	4.60517			9.15907	7.23562
	9.02557	6.69851			8.56896	5.9733
	9.10048	7.80661			8.89408	4.4403
	8.68699	3.3322			8.88055	6.5748
	8.89612	1.16315			9.08409	7.49732
	8.75602	6.82437			8.86114	6.31644
	8.88451	5.15213			8.58601	7.6786
	8.9254	3.70868			9.41079	6.63961
	8.81591	5.38633			8.83369	7.16209
	8.86701	7.30142			8.75309	6.57368
	8.98664	5.49388			9.05901	2.41591
	8.86788	8.19533			8.36947	4.69684
	9.12306	5.25332			9.06599	8.46075
	9.04243	8.10916			8.55306	1.97408
	8.53056	4.62104			9.17866	5.88832
	8.97431	6.43999			9.11689	5.20181
	8.85071	6.62698			8.95856	8.12634
	9.2355	7.45657			8.44476	5.24492
	8.40088	4.40183			8.81425	2.7213
	8.85823	4.41159			8.96246	6.72863
	8.48921	4.4682			8.80267	5.48064
	9.20143	4.4403			8.66638	5.65739
	9.20474	4.94734			9.27521	6.38486
	9.09736	6.11191			9.1596	2.41591
	8.97533	4.29865			9.00948	5.52625
	8.76303	3.80221			8.73779	5.89054
	9.09674	4.86445			8.91404	6.64795
	8.82059	4.51305			9.26868	7.84149
	8.7181	5.38266			8.96817	6.22891
	9.18542	6.95235			8.87059	6.374
	8.59224	4.20767			8.66338	3.3322
	9.47019	5.87942			9.01409	5.3452
	8.21964	4.1463			9.44142	8.71315
	9.31892	7.72701			9.11156	7.01103
	8.60946	7.70814			8.6525	5.57897
	9.17095	6.53959			8.67563	4.70411
	8.81324	4.25419			8.8088	4.12066
	9.41069	6.81739			8.89824	4.7185
	8.84635	4.27667			8.99452	8.05274
	9.19554	6.13816			9.00019	4.51305
	9.05873	5.06512			9.25264	7.34265
	9.08669	7.03808			9.04668	6.95769
	9.32131	6.31065			8.77364	6.36027
	9.13296	6.40225			8.59626	4.62104
	8.82169	2.07944			9.06412	6.27965
	8.74946	5.31812			8.74196	6.2001
	8.58148	7.90927			9.0657	5.79788
	8.74955	4.26549			8.45892	7.21935
	8.54694	1.8563			9.01409	6.04784
	8.92449	4.13357			8.81536	4.95301
	8.52896	4.96981			8.99282	5.91025
	9.17191	7.10464			8.97085	7.67971
	8.4639	6.57144			8.81646	6.26758
	8.86438	6.35611			9.37421	5.99546
	9.09917	6.881			9.23429	6.69357
	8.7697	6.96829			9.13155	4.50424
	9.01251	6.35193			9.27904	6.02683
	9.21479	6.72479			8.97045	6.26149
	8.46102	8.37194			9.07731	8.50932
	9.18929	3.10906			8.75377	7.49064
	8.74788	5.55451			9.4291	7.59126
	9.40876	5.18403			9.12076	7.21876
	9.19213	4.64439			9.06856	6.48738
	8.76864	6.21461			8.81296	6.76157
	9.32795	6.62486			8.79236	1.56862
	8.88828	5.48397			8.77957	7.47625
	8.93655	5.27811			9.06878	5.39363
	8.96982	5.35659			8.92655	6.29453
	8.76545	5.6233			9.22088	6.38486
	9.04045	4.33073			9.38317	7.85926
	8.94975	5.52943			8.91246	5.88165
	9.1961	5.46383			8.5666	5.72228
	8.6637	5.8659			9.94022	5.98545
	8.93932	6.17212			8.92135	5.12871
	8.56329	5.77579			8.79048	3.76584
	8.60561	5.36411			8.77747	6.33789
	9.08028	4.45899			9.24848	6.74382
	8.71475	5.55451			8.86745	5.42935
	8.98749	5.54205			8.54054	-0.223144
	8.76671	5.02913			8.89604	6.32077
	9.41328	6.59687			8.67827	5.70111
	9.03441	4.50424			8.67658	4.50424
	9.04008	5.43982			8.7965	6.43615
	9.32065	5.78567			8.84367	6.89406
	9.05901	7.14457			9.20568	7.95071
	9.05901	5.34901			9.05287	8.39281
	9.04434	5.5576			9.533	7.31695
	8.67234	6.62486			8.66915	4.05352
	8.67372	6.53379			8.73719	3.58352
	8.61172	4.70411			8.81139	7.46118
	9.09951	5.55141			9.37221	7.5993
	8.59316	5.45703			8.92655	5.19296
	9.11143	8.03916			8.86158	6.50189
	8.85682	6.46646			8.9296	7.20578
	8.92804	3.38777			8.79791	6.17545
	8.61858	6.70833			8.97509	4.98086
	9.07256	6.72863			9.2035	6.95693
	8.8657	5.23644			8.52232	4.72562
	8.64358	1.8563			8.71587	7.76268
	8.57787	6.35193			9.42109	7.13314
	8.92449	-0.223144			8.5432	4.37198
	8.87796	4.65205			8.59178	4.80729
	8.91613	5.66018			9.04784	8.33308
	8.66092	4.2312			8.95769	4.65205
	8.67224	5.38266			8.86017	5.80994
	8.78033	7.46988			8.7866	4.32015
	8.65185	7.55841			8.8657	4.90676
	8.94354	7.07598			9.18185	6.27061
	8.736	4.61314			8.63722	5.96307
	8.677	5.64332			9.21183	4.99721
	8.88588	8.10119			8.95705	8.63636
	8.86465	5.89054			8.97164	6.95845
	8.81517	3.27336			8.30275	5.30629
	8.76999	7.08674			8.89502	6.92284
	9.03374	7.97136			8.7075	4.53045
	8.85982	7.63588			9.03167	3.44042
	9.47224	7.6045			9.20512	7.49865
	8.44529	4.25419			8.94321	7.70886
	8.9736	6.65209			8.35586	2.34181
	8.8957	7.45287			9.0403	5.38633
	8.47548	5.20181			8.67309	5.44674
	8.98966	6.0093			9.2281	3.99636
	8.5358	6.65209			8.79903	5.64615
	9.33607	6.243			8.95297	4.76046
	8.54525	6.29305			8.96	7.84808
	8.89374	4.48639			9.87331	5.18403
	8.79565	5.82895			9.21984	6.374
	8.70493	6.78355			9.33591	6.36441
	8.88845	5.27402			9.513	7.03527
	8.78214	8.2767			9.04843	7.43791
	9.22144	7.2922			8.56625	3.98155
	8.92268	6.60557			9.22383	3.96651
	8.62516	6.78807			9.13323	4.99721
	9.03662	6.10301			8.72165	5.2062
	8.90407	5.96307			9.0652	8.39913
	9.01417	6.50429			9.16162	6.11722
	8.87268	3.03495			8.84572	4.39198
	8.76196	7.22694			9.20337	6.85013
	8.41759	5.54518			8.98702	7.30787
	8.80481	3.66868			9.27788	7.36265
	8.37734	5.92746			8.5719	5.45018
	8.90567	6.15867			8.86316	6.24611
	8.71638	4.82671			8.77804	4.05352
	8.86788	7.31588			9.09577	5.5576
	9.06269	6.09402			8.7362	4.37198
	9.29995	7.41746			9.01605	3.74715
	8.93745	3.93574			9.5189	6.2114
	8.93932	7.9348			8.57261	6.40886
	8.7281	3.8373			9.19024	5.32593
	8.9012	3.98155			9.15167	2.34181
	8.69107	4.37198			8.47638	5.24913
	8.72013	5.0186			9.12785	5.95272
	8.79659	6.21461			9.0783	4.71133
	8.7356	7.12158			8.90103	7.40683
	8.79734	6.78083			8.91986	4.81381
	8.31254	5.5483			8.88743	5.76331
	8.5521	5.96101			9.38019	4.1463
	8.76264	7.30841			8.84429	6.74288
	9.00895	5.47395			8.89731	3.21084
	8.70102	6.01908			8.64903	4.82671
	9.05995	8.37857			9.09563	7.41938
	9.16836	5.80754			8.82488	6.66441
	8.6788	5.96101			9.06649	6.72575
	9.10724	7.25106			8.76979	6.51145
	8.53495	6.17045			8.9454	6.48981
	8.55018	4.02535			8.84563	5.33368
	9.24249	5.84064			9.07042	6.47882
	9.47434	7.83455			8.48947	4.62104
	9.4807	7.71708			8.67542	7.70526
	9.09061	8.37342			9.3065	5.585
	9.17288	7.5279			8.95785	6.98546
	8.8777	5.06006			9.23755	6.6695
	9.07795	5.97126			9.44167	7.21406
	8.94991	6.65929			8.9441	4.83945
	8.76574	6.33363			8.80806	3.78419
	9.10401	6.25383			9.0501	6.74853
	8.79378	6.28711			8.62639	6.17877
	9.23375	6.28563			8.79189	4.65205
	8.74166	6.12774			9.24117	6.72959
	8.70822	5.65459			9.24021	7.89028
	8.7568	5.09006			8.79086	1.97408
	8.87233	7.61204			8.9076	5.04986
	8.9627	4.64439			9.7369	7.57988
	8.81195	7.21465			8.70822	7.39265
	9.36496	8.71421			9.24728	7.55716
	9.43718	6.17212			8.6316	4.15888
	8.94927	7.33433			8.96888	5.47059
	8.83287	7.40829			8.95313	4.72562
	8.74897	7.45147			8.82961	7.71993
	9.12624	6.77901			8.89204	6.25229
	8.20247	7.66143			8.86351	4.90676
	8.90794	6.38486			8.80258	5.67675
	8.63909	6.90695			8.95176	6.34071
	8.84929	6.92834			8.78954	6.2492
	9.15272	5.86363			9.27771	6.49224
	8.68238	3.91999			8.65175	5.57291
	8.88159	6.10301			9.00134	6.72671
	9.37998	6.85351			9.11648	5.62618
	8.90238	5.10958			9.20125	5.0133
	9.01289	5.10473			8.79537	4.12066
	8.20552	5.92746			9.00759	3.21084
	8.78214	3.85439			9.13222	6.8686
	9.08317	6.96224			8.83152	3.27336
	8.81333	7.39952			9.01198	5.8003
	9.0307	4.4682			9.10697	4.3412
	8.83088	4.53903			9.27579	6.00537
	8.44795	1.16315			8.35368	4.30946
	8.83793	4.99179			9.71165	8.75185
	8.83711	6.01518			8.67362	4.35157
	8.45813	5.27811			9.27224	6.91572
	8.96175	4.83945			8.9034	5.56682
	9.07859	7.33381			8.82379	3.90399
	8.99843	7.93423			8.91563	8.182
	8.81056	5.23644			9.03662	8.39733
	9.67496	8.55764			8.7286	4.41159
	8.90272	5.56375			8.8101	7.77351
	8.80444	4.05352			8.6524	5.17953
	8.72387	6.31933			8.94524	4.08092
	9.05887	4.55598			8.83882	4.32015
	8.78252	8.64555			8.73679	6.06843
	8.54211	5.55141			8.84563	5.85908
	9.34109	5.87493			8.63282	5.04986
	9.19194	5.87493			9.14699	6.5442
	8.75982	4.94734			9.12954	4.96424
	8.74897	5.79545			8.905	5.39363
	8.85	4.02535			9.14726	7.05064
	7.79044	3.58352			9.03507	7.60489
	8.85753	6.76711			8.65963	5.0186
	8.98034	6.70245			9.10552	7.13441
	9.24943	6.16877			8.54211	7.10857
	9.01349	6.07764			8.8425	8.17482
	8.41127	5.41521			9.02445	5.39363
	8.78859	7.19684			9.03684	4.52179
	9.43357	6.59469			8.65887	6.6796
	8.70565	5.35659			8.96103	6.97877
	9.07077	3.85439			9.17725	7.63897
	9.70475	6.13816			8.72134	3.91999
	8.50226	7.39265			8.89323	6.01713
	8.90323	8.27568			8.7849	5.71966
	8.69885	5.0026			9.35094	7.21406
	9.04067	6.25996			8.90255	5.51986
	8.99105	3.93574			9.16694	6.21621
	8.68248	4.98634			8.9235	5.02388
	8.79255	6.77992			9.48193	6.11368
	8.97893	8.45668			8.9341	5.83831
	8.8484	6.20658			8.7745	4.57265
	8.79725	3.03495			8.69315	6.32077
	9.3553	6.50189			9.21978	7.49821
	8.90002	6.0904			9.23077	5.82423
	8.76497	4.24276			8.80797	4.91852
	8.27265	7.78456			8.8336	5.97939
	9.14772	4.85826			8.97909	6.20496
	9.03618	8.36152			9.18884	6.82871
	8.71424	4.17131			8.78157	7.28619
	9.29032	2.91235			8.87649	4.73268
	8.92375	4.12066			9.31842	3.07269
	8.71628	5.88388			8.75963	4.1957
	8.99051	6.28711			9.27148	5.5576
	9.01854	6.92599			9.19302	6.03452
	8.65963	6.44254			9.03196	5.75827
	8.99697	4.4682			9.09688	6.26149
	9.02356	6.60449			8.82698	4.29865
	9.1581	5.45018			8.62327	4.28772
	9.28648	6.30189			8.80593	6.65518
	9.14871	5.5037			8.93932	5.56987
	8.418	5.65179			9.0428	5.66573
	8.79912	7.25898			8.94734	5.16593
	8.98205	6.36165			8.61779	5.32593
	9.04894	5.51665			9.27457	6.54535
	8.69657	5.20181			9.29926	7.01103
	9.1082	5.2062			8.9747	6.18374
	9.22321	7.65387			9.22596	6.91572
	8.69419	4.95301			9.19131	6.963
	9.68419	6.72863			9.32944	8.10507
	8.47844	2.82138			9.70119	7.49599
	8.81582	7.10923			9.62896	7.23735
	8.95864	7.76506			9.09924	6.66645
	8.97172	6.39426			8.85275	5.32982
	8.7351	3.70868			8.73789	7.04925
	8.87354	5.37157			8.79856	7.92588
	8.75846	6.02102			9.04704	5.04471
	9.07958	6.34353			8.86998	6.65724
	9.18992	7.89297			9.17166	4.80074
	8.76777	7.32383			8.78414	6.97429
	8.72578	8.0684			9.14163	0.470004
	9.47913	8.93316			8.89153	3.30322
	9.31284	6.48372			9.66273	6.57814
	8.99004	6.40092			9.30858	4.15888
	9.02288	7.48527			9.33114	8.00129
	9.0549	5.7301			8.79865	7.19083
	8.7949	6.30628			8.6919	8.43832
	9.29978	5.72489			9.71037	7.29057
	8.95673	2.82138			8.84786	6.97504
	8.61543	5.10958			9.17056	7.05686
	8.99213	6.63647			8.78783	4.41159
	8.79847	4.32015			9.10166	5.25332
	8.87146	8.4543			8.9654	6.35193
	9.08549	-0.223144			8.54982	5.99546
	8.88012	2.66723			9.03411	7.25049
	8.38643	3.91999			9.07767	4.62104
	8.96919	5.64332			9.18903	6.42065
	9.17269	6.3393			9.13583	6.07764
	8.89093	6.82089			9.65779	4.95864
	9.13135	4.61314			8.91454	4.38203
	9.23876	4.80729			8.89008	6.7315
	8.59166	6.90294			8.92086	8.01354
	9.27921	5.14749			8.70092	6.63332
	9.42969	6.55905			8.85071	6.50907
	9.09723	6.32651			9.36379	5.20181
	8.89884	7.41023			8.95681	7.57988
	8.91221	4.97535			8.93345	8.62608
	9.29306	6.37809			8.8758	5.8659
	8.53836	4.91852			9.61181	8.1041
	9.18884	7.14204			9.26634	4.06732
	8.9034	8.2309			8.93728	6.82263
	9.18453	6.18867			8.89502	6.14504
	9.28377	6.8661			8.88064	7.65879
	8.82952	6.67557			8.94459	5.25332
	8.2554	4.57265			9.06692	5.29431
	8.74897	5.0026			9.27829	4.21951
	8.87848	1.8563			9.015	6.11545
	8.85426	5.82423			8.93222	7.34833
	8.77277	3.68888			8.96872	6.87688
	8.82132	6.28264			8.96079	5.06512
	9.18147	6.89811			8.74166	5.44328
	9.34457	5.2062			8.68542	3.8712
	8.50591	5.52306			9.33733	8.38151
	8.51911	3.44042			10.009	5.97126
	9.70796	7.08272			9.00721	7.66781
	8.90685	4.82671			8.72578	6.93225
	9.73235	7.7153			8.72225	6.78536
	8.9012	7.33537			9.2143	8.08629
	9.30582	6.81914			8.81573	6.41542
	9.46337	5.97737			9.21455	6.40886
	8.89544	6.296			8.91878	5.81234
	9.09813	5.73269			9.16448	7.07395
	8.90651	6.31355			8.77489	7.4676
	8.68364	5.94227			8.76574	5.12396
	8.96603	8.6258			8.7353	5.26992
	9.1784	6.82785			8.94798	6.23832
	9.13477	6.33647			9.23912	6.23363
	8.83855	4.53045			8.59832	6.37264
	8.66713	4.33073			8.67393	3.21084
	8.95896	6.56583			9.08584	5.43285
	8.63293	5.81949			9.28498	7.17564
	8.41375	5.2575			8.85355	7.26571
	8.89697	6.62167			8.94919	7.04647
	9.5531	6.39024			9.32425	7.28235
	9.22913	3.66868			9.43014	6.60989
	8.88107	4.37198			9.07063	7.42798
	8.85222	4.12066			9.11505	3.81991
	9.58092	7.30196			8.53446	4.87672
	8.86061	4.21951			9.34402	7.76268
	8.81784	5.34138			9.81201	4.74667
	8.86298	4.43082			8.70719	5.07016
	9.07106	4.2312			8.68637	5.31419
	8.54537	4.02535			8.92623	6.43358
	8.77517	4.85203			9.11552	5.04471
	8.96461	8.08703			9.43441	4.7185
	9.15253	3.85439			9.19093	7.58111
	9.10793	7.01822			9.00819	4.44969
	8.85275	5.03955			9.1956	4.76046
	8.92086	5.8522			8.86158	7.22402
	9.05018	5.61167			8.93279	4.39198
	9.19137	7.13441			9.18523	4.88884
	9.44946	6.46646			8.89595	6.53495
	8.80574	6.36716			9.00857	4.94164
	8.84608	1.72277			9.20922	7.06099
	8.91878	4.54754			8.41458	4.81381
	9.1047	7.28125			9.00226	6.587
	8.45166	4.49536			9.20941	5.55451
	9.29106	6.24611			9.4251	6.80417
	8.61487	4.15888			8.92705	5.37898
	9.04617	7.51447			8.6637	5.2575
	9.06842	6.15018			9.28602	6.18043
	8.34576	5.78074			8.92795	5.84064
	8.66787	1.97408			8.92738	7.22752
	8.7312	4.02535			8.77153	6.29305
	9.08528	5.04986			8.7347	5.98946
	8.61228	7.00452			9.377	7.58437
	8.39543	5.4773			8.7885	4.55598
	8.88167	6.15528			9.28019	6.92991
	8.72043	5.57291			8.66177	6.52562
	9.51794	7.28838			8.95473	6.30628
	8.98819	7.5807			8.91237	4.20767
	9.00424	4.68213			8.96967	4.55598
	9.40249	6.22416			9.22468	7.36619
	8.92392	7.6045			8.40796	7.86419
	8.91179	4.50424			9.08134	8.07863
	8.43444	4.51305			8.8539	3.21084
	9.0662	3.64806			9.48847	7.13632
	9.1462	6.09402			8.62772	5.43982
	9.21929	6.83131			8.81019	7.03174
	8.77402	5.57595			8.98757	6.36716
	9.38176	6.42065			9.13684	6.51856
	9.09173	5.18403			8.77737	6.85097
	9.00279	4.96981			8.85311	6.95693
	8.7569	4.36182			8.75171	5.18403
	9.16038	7.50571			8.84394	4.70411
	8.91795	5.97534			8.92532	3.58352
	8.99513	6.00141			9.07341	7.00015
	9.05185	4.65966			8.95433	5.71703
	9.38842	7.45101			9.18376	3.46574
	8.75475	6.38351			8.77928	4.02535
	9.3101	6.91889			9.25662	5.94856
	9.09965	4.6747			8.4013	5.46044
	8.95649	6.34774			9.06635	6.99869
	9.3838	5.64332			9.35899	3.03495
	8.60311	6.07028			8.63293	3.99636
	8.76196	5.12871			8.8934	5.79545
	8.44382	7.88488			9.05887	6.71998
	8.74107	3.8373			9.33377	4.05352
	8.17735	6.05162			8.65304	5.5576
	8.36052	2.26176			7.50062	2.34181
	8.39501	5.47395			9.15868	7.18902
	8.78679	6.04784			9.07752	5.22789
	8.97093	4.68951			9.14163	6.2569
	9.2053	6.08495			8.87041	6.98841
	9.24597	6.08677			8.81019	6.55336
	8.85673	5.74556			8.6403	2.95491
	9.27921	6.92677			8.83161	4.49536
	9.471	7.42417			8.72256	6.06099
	9.30481	6.62167			8.99789	8.15249
	8.91629	6.7372			8.62594	4.15888
	8.63766	5.40087			9.04624	5.5576
	8.8399	6.587			9.15672	6.52679
	8.81931	8.23472			9.33153	6.65827
	9.01221	6.3393			8.7317	5.93384
	8.93753	5.58199			8.78954	5.80754
	9.05649	4.90082			9.32458	5.67401
	9.1397	7.22052			9.033	8.50706
	9.11156	6.90535			9.10793	6.5545
	8.90449	6.85013			9.1395	6.5925
	8.9669	5.49717			9.03063	5.55451
	8.85885	6.92599			9.67943	7.49953
	9.08472	5.43634			8.92836	5.12871
	8.95449	6.13643			8.93173	7.542
	8.66424	4.89485			9.24567	4.8828
	9.10442	6.73435			9.04639	8.50609
	9.295	5.29832			8.6578	3.90399
	9.03788	5.06006			9.16461	7.24079
	8.76041	6.36853			8.97588	5.07016
	8.48153	3.21084			9.41596	6.46397
	9.15489	5.66018			9.14276	7.72489
	8.40533	5.08512			8.72316	4.94164
	9.34776	4.62104			9.00918	5.04471
	9.11368	6.64795			9.49175	5.98141
	9.2063	6.88674			8.82634	6.58036
	8.89629	4.64439			8.90002	4.10759
	8.77431	4.09434			9.345	4.08092
	9.12035	4.15888			8.77785	4.30946
	9.06362	6.68561			8.86131	5.38633
	8.57577	4.69684			8.87865	5.51343
	8.45787	4.90676			8.87917	5.84528
	9.35121	9.18326			9.113	4.12066
	9.01605	7.01751			8.87675	5.743
	8.75054	4.65205			8.93508	5.89495
	8.69127	4.01096			9.40049	6.97504
	9.73227	7.29383			8.94911	6.86359
	9.39967	7.50703			9.01266	5.21927
	8.81839	5.17502			8.51353	3.64806
	8.85222	5.2575			9.00515	6.7504
	8.94717	6.243			9.01929	8.41005
	8.73849	4.4403			9.00004	6.91968
	8.88631	6.49224			8.87041	7.65879
	8.87111	5.98141			9.14792	6.87853
	9.12401	7.32066			8.87926	8.04148
	8.87909	5.28624			9.28602	6.02683
	8.99421	4.25419			9.18262	6.91731
	8.36471	4.61314			8.69346	6.94698
	9.18211	5.0186			9.16849	6.34774
	8.52933	6.69654			8.89731	5.60874
	8.7317	3.46574			8.9107	5.59694
	8.70596	5.0186			9.37894	4.93591
	9.28227	5.17953			8.89102	5.37157
	9.22499	4.86445			10.1682	7.71886
	9.06125	4.83945			8.69895	4.78749
	9.01274	4.90082			8.76613	5.33754
	8.35441	4.24276			8.68511	6.98546
	9.12374	6.28413			9.21707	8.07216
	8.87128	5.7275			8.90281	6.11545
	8.78916	5.06512			8.94094	8.59029
	8.48038	4.36182			8.86149	4.78749
	8.77181	2.82138			8.84982	4.95301
	8.9584	7.18235			9.00978	6.63332
	9.49044	7.83043			9.1988	8.01961
	8.90861	5.10473			8.5809	7.37526
	9.15062	5.75827			8.35732	4.82671
	8.9992	6.95388			8.84742	6.57703
	9.7124	5.42935			9.02661	8.92596
	8.74739	6.77537			9.15482	4.90082
	8.65887	8.16917			8.74245	6.296
	8.74571	4.91852			9.14746	3.85439
	8.9833	6.8661			8.54187	3.44042
	8.98244	6.68161			9.37951	6.83647
	8.44888	5.06006			9.05265	6.78446
	8.98057	6.84332			8.91095	5.11439
	9.06226	8.13388			9.61793	7.47216
	8.83061	5.70111			8.77479	6.15528
	9.00057	4.63667			8.7289	4.10759
	8.94725	5.59397			8.99567	4.40183
	9.02743	6.57814			9.31631	7.55632
	8.93271	6.23832			9.1359	7.20934
	8.94629	5.89715			9.06649	7.02678
	9.35803	6.79883			9.19811	6.29895
	8.96627	5.26579			9.22535	6.0904
	8.96556	8.0934			8.62894	5.51986
	8.80015	8.63109			9.64892	8.93506
	8.80778	5.28624			8.96056	7.0282
	8.98291	6.88918			9.11825	5.40807
	8.7177	6.58036			9.20499	6.41804
	9.02966	5.73528			8.32884	3.70868
	8.57892	6.0904			8.93737	6.0535
	8.82834	5.45018			8.51477	4.21951
	8.92754	7.02108			8.95864	5.77579
	8.75651	3.41444			8.52306	5.15675
	8.57073	4.1463			8.75895	6.55108
	8.68783	5.39363			8.75914	6.24766
	8.96318	6.19359			9.21244	5.83831
	9.11334	6.05538			9.00576	4.36182
	9.02079	4.74667			8.78575	6.07581
	8.57717	5.743			8.87024	6.92756
	8.85213	2.99573			9.06978	4.68213
	9.4266	5.76832			8.89349	6.24456
	9.07291	7.44729			8.74423	6.11722
	8.75856	8.31659			8.82114	6.04216
	8.8821	7.47307			8.94467	5.43634
	8.67277	2.26176			8.96365	3.51453
	9.02086	5.41521			9.08049	5.36411
	8.64511	4.97535			9.65354	7.88065
	8.94451	7.64969			9.02303	5.31812
	9.1714	6.18867			8.30551	6.27664
	8.71993	8.03864			8.62839	5.26579
	9.05894	6.57925			9.26387	8.22491
	8.6578	6.2098			8.59408	7.50086
	8.9878	8.97239			8.82752	3.8373
	9.05032	6.94698			9.04214	4.53903
	9.11593	7.49909			8.56294	4.50424
	9.00073	5.67675			9.18045	5.34901
	9.17949	6.31644			8.81167	5.56068
	8.94159	6.17877			8.82707	6.11191
	9.21504	4.85826			8.68059	6.34353
	8.68101	4.39198			8.74631	5.98545
	9.72888	7.43744			9.4157	8.91226
	8.86552	6.5419			9.1683	5.45703
	8.75612	5.41165			9.35481	8.83148
	9.00766	5.09987			8.96919	5.71175
	8.84322	4.41159			8.76738	6.18539
	9.33984	8.45923			8.96919	4.15888
	9.12387	5.12396			9.11074	6.87523
	8.76031	5.39726			8.96722	5.24913
	8.58786	4.70411			8.00725	4.44969
	8.8725	6.23206			8.5044	6.12074
	8.81481	5.52625			8.87519	8.64836
	9.05461	5.16135			8.79753	4.05352
	8.57436	4.62889			9.2183	8.55024
	8.73829	7.07055			8.54392	4.05352
	9.1069	3.70868			8.93377	7.62188
	9.08416	8.12752			8.50138	7.17196
	8.79584	6.92756			8.75592	6.36303
	8.98127	7.17012			9.53022	7.30948
	9.21312	4.56435			8.61622	7.6708
	8.53166	6.18208			9.1294	6.11014
	8.83134	5.65459			9.28227	6.74571
	9.50051	6.39024			8.77947	7.46851
	8.99282	6.75507			9.38066	5.54518
	9.04857	5.90591			9.00409	5.14749
	8.73789	3.81991			8.79819	6.126
	8.61341	5.51343			9.0897	5.80994
	9.01016	5.21927			8.7344	5.41521
	9.01553	5.40087			9.14732	6.62804
	9.17211	4.1463			9.30396	6.47266
	8.75514	4.35157			8.96959	4.84576
	8.8643	7.42082			9.281	7.02037
	8.54585	6.6291			8.95176	6.41673
	8.87857	5.0186			8.76574	4.69684
	9.82141	7.29002			8.89663	5.90808
	8.84376	5.56375			9.16337	6.6174
	9.06749	7.18417			9.13443	4.48639
	9.73774	6.48981			9.44034	6.2492
	8.8492	6.00537			9.01228	4.39198
	9.39065	8.21825			9.16142	4.26549
	9.0588	5.03435			8.92623	5.5326
	8.59797	6.35888			9.32574	7.33381
	8.91262	3.46574			9.1978	6.93459
	9.26152	5.5483			8.85222	4.76729
	8.16014	3.30322			8.92655	9.05793
	9.22499	6.46022			8.99835	6.95616
	8.22115	5.89275			9.27008	8.85743
	8.90314	6.00734			9.51177	2.66723
	8.70904	4.49536			8.99989	8.02539
	9.13148	6.40622			8.87736	7.56216
	8.97085	4.7808			9.33498	4.83945
	8.86692	7.48616			8.96111	6.18703
	8.91986	6.28711			8.42714	6.68761
	8.71333	6.05538			8.91504	6.23519
	8.89408	5.37898			8.39515	4.68213
	9.38946	7.39412			8.77737	5.55451
	8.07337	4.63667			8.86228	5.42935
	8.5403	7.16022			8.74423	6.35333
	8.9765	5.6175			8.5627	6.13988
	8.82205	3.8373			8.76177	4.85826
	8.92235	5.42583			9.06813	4.18358
	8.87736	5.30629			9.23278	7.1496
	8.7037	5.42935			8.85284	4.8331
	9.05605	6.12249			8.57401	2.7213
	8.65575	6.38215			9.29483	5.98141
	9.02258	7.22052			9.08254	3.81991
	8.76322	6.26302			8.81775	6.12774
	8.67362	7.02607			9.41186	6.37127
	9.21978	7.66557			8.76902	7.22052
	8.92102	4.25419			9.27352	6.06843
	8.95096	6.1671			9.06405	6.48981
	8.95136	6.89163			9.01628	6.5647
	9.23707	7.51185			8.91554	3.90399
	8.92491	6.14504			9.3264	8.19842
	8.90617	5.39726			8.57436	5.37157
	8.779	8.17864			8.48998	3.88773
	8.9654	6.01518			8.74719	5.66018
	8.62783	8.64485			8.99213	7.64969
	8.75739	6.12774			8.34811	1.56862
	8.48153	5.66296			9.00614	7.75722
	9.44403	6.82698			8.68017	6.69851
	8.74354	5.5999			8.69999	6.19848
	9.2196	6.47882			9.00279	7.44495
	8.86123	3.85439			9.83448	6.24456
	9.08148	7.49776			9.02019	7.32594
	8.90458	8.26873			9.14607	6.42195
	8.5403	6.02296			8.54368	7.50263
	8.94822	4.71133			8.77441	5.12396
	9.17462	7.95634			8.60265	5.43634
	8.7175	6.9252			8.78167	8.25427
	8.64936	6.70735			9.51716	6.52562
	8.81305	5.71703			8.52958	4.48639
	8.9071	6.57703			8.92606	8.49356
	8.89604	5.15213			9.03913	7.60489
	9.03714	6.29009			8.8917	2.34181
	9.07334	6.49224			8.729	5.4773
	8.92111	8.09291			8.55676	8.2551
	8.60185	3.17805			8.08011	5.9548
	8.98973	8.44626			9.01726	7.51578
	8.69792	5.45018			9.03581	5.41521
	9.25134	5.12871			8.72488	6.39426
	9.04404	7.11574			8.85691	5.88832
	8.58032	4.61314			8.53385	5.89715
	8.44649	7.40391			9.05468	5.7301
	9.12354	5.19739			8.72023	5.95064
	8.85814	6.26302			8.86841	5.95894
	8.81995	4.89485			9.21677	7.63974
	8.76245	6.06471			8.84107	7.2601
	8.59877	3.41444			8.60504	4.71133
	8.62193	6.25075			8.53738	4.06732
	8.88434	8.21067			9.00103	5.96922
	9.09993	5.35659			9.74431	4.62889
	8.97776	7.14393			8.86254	7.41602
	8.47986	4.08092			9.1635	8.62809
	8.94621	3.85439			9.156	3.70868
	9.28274	5.56987			8.46429	4.94734
	9.09709	5.79788			9.1213	5.84759
	9.45462	7.09207			8.6564	5.8499
	8.27754	7.6037			8.79312	6.16205
	8.77804	6.78807			8.85186	6.71028
	8.67128	5.82895			9.06204	4.7808
	8.6807	4.39198			8.96	4.28772
	9.29637	7.14204			9.05815	5.99546
	8.34104	4.38203			9.37026	5.17502
	8.6607	4.90082			8.4551	5.31812
	8.60163	3.36038			9.17372	6.00339
	9.18376	3.7281			9.02071	8.51751
	9.00416	6.01518			8.82059	5.68222
	9.07426	5.87942			9.3665	6.97129
	8.85151	4.91265			9.15764	8.6183
	9.23035	7.83518			8.89765	5.79301
	8.92202	8.36637			9.12563	6.64275
	8.8408	5.31025			9.14686	6.31065
	9.12428	6.26302			9.28216	7.21229
	9.0509	5.44674			9.02041	4.08092
	8.9729	4.57265			8.49341	6.19522
	8.97337	5.93595			8.88176	7.53647
	8.87128	5.82895			9.07979	2.99573
	8.41732	5.11439			9.03174	3.58352
	8.82916	4.8828			9.21843	4.06732
	8.67022	3.90399			8.86061	5.94017
	8.86937	5.80994			9.13336	3.68888
	8.63524	7.92646			8.8205	4.6747
	8.83061	5.64332			9.38941	6.18374
	8.63038	7.88848			9.25431	5.90154
	9.65878	7.25841			8.78963	6.01127
	9.02124	6.32508			9.03485	3.6055
	9.31592	5.68222			9.4431	5.8861
	8.71841	3.49043			8.61678	3.95124
	8.76254	5.5576			8.97219	7.21583
	9.39024	5.43285			9.58386	7.03668
	8.89595	6.30628			8.85656	7.52143
	9.46034	6.63961			8.97454	8.38845
	8.70473	5.5576			9.01342	6.55222
	9.13837	3.98155			9.39241	6.50787
	9.69955	5.33754			8.84206	6.68261
	9.18434	7.39511			8.98236	6.74665
	8.74037	5.67675			9.10414	5.67126
	8.67404	6.43743			8.76854	4.01096
	8.83558	2.54945			9.3553	5.52306
	9.29306	7.40732			8.85337	9.1561
	8.80658	7.95493			8.76021	6.00537
	8.82086	5.38633			8.76555	6.79615
	9.32635	7.21347			8.60538	3.51453
	9.74775	7.90012			9.38531	7.62501
	8.7303	4.85203			8.86131	4.94164
	8.8671	5.17953			9.05678	6.40622
	8.8363	4.24276			9.26311	6.50429
	9.55217	7.83106			8.51886	3.78419
	9.03004	2.7213			8.80248	4.65966
	9.16979	4.84576			9.17673	7.70454
	9.21244	6.881			8.55914	5.39726
	8.82114	3.27336			9.37595	5.33754
	8.78878	5.45703			8.93655	4.01096
	9.22033	5.46722			8.72629	6.36441
	9.51319	7.22984			8.56128	4.06732
	9.08648	5.80272			8.95777	8.21933
	9.22877	6.11545			8.82825	3.78419
	8.98501	5.75067			8.48985	6.32364
	9.17327	7.29709			8.84313	8.46497
	8.83648	5.37898			8.57413	4.71133
	8.97164	7.95325			8.7526	7.95774
	9.53278	5.83598			8.576	6.41542
	9.06549	3.14415			9.10221	6.62274
	8.80871	3.36038			8.75465	5.66573
	8.94427	4.64439			9.13296	6.6174
	9.18096	7.3068			9.33678	7.47715
	9.37216	7.1248			9.37679	4.1463
	9.38019	4.68951			9.04792	7.92761
	9.08113	6.40622			8.8022	4.94734
	8.61465	5.585			9.09319	8.42438
	8.83115	5.36784			8.98578	5.7091
	9.00042	5.72489			9.00164	5.0026
	8.53104	5.65179			8.7318	8.35213
	8.63016	4.65966			8.62572	4.58904
	8.93525	4.62889			9.23677	5.88388
	8.74156	5.36411			9.47438	4.90676
	8.82671	3.90399			8.80295	5.99745
	8.87805	6.5419			8.93459	6.74946
	8.91779	6.01908			9.19629	4.44969
	8.90794	8.16462			9.62139	6.78717
	8.84232	6.11545			9.06921	8.9589
	8.86788	5.24913			9.02937	5.17953
	8.87986	4.30946			8.69127	6.57925
	9.07979	5.89715			8.5049	4.76729
	9.2471	8.99705			8.95824	6.0249
	8.72215	6.94698			8.50503	4.03954
	8.67351	4.53903			8.79274	4.66721
	8.86945	5.15213			8.67107	4.72562
	8.6216	4.7808			8.4006	5.29431
	8.70904	5.51343			9.34033	5.17048
	9.09958	8.32535			9.96428	6.77171
	8.86876	6.36303			8.81471	6.25229
	9.03802	5.11919			9.14554	6.57256
	9.12144	6.71223			9.27515	6.71901
	8.9192	6.32508			9.08233	5.38266
	8.60595	5.72489			8.79791	4.94164
	9.20767	5.89495			9.27329	8.01354
	8.65855	5.82186			8.93328	6.25229
	8.78433	6.05725			9.32087	7.12866
	9.38765	7.3667			8.60026	5.96922
	9.11764	3.46574			9.20524	5.09006
	9.04704	5.39363			9.01054	3.07269
	8.88674	5.60874			9.04792	6.38755
	9.12651	6.18703			8.99651	6.25229
	9.14335	6.50787			9.08507	3.51453
	8.7306	4.62889			8.7349	6.17545
	8.66595	5.99943			9.20093	8.40093
	9.24495	-0.223144			9.12536	6.2886
	8.80537	4.02535			9.26593	4.71133
	9.19421	6.71417			8.82852	4.95301
	9.52349	7.0603			8.7848	6.08495
	8.77498	3.8712			8.90911	5.1885
	9.30334	7.46026			8.79086	5.69306
	9.20162	5.07517			8.8764	5.85908
	8.58113	5.61459			8.95816	6.88182
	8.73769	5.15213			8.81967	4.42125
	9.17686	5.70378			8.63182	4.7808
	8.84026	3.49043			8.90903	3.85439
	8.728	7.96749			9.19604	6.66645
	9.18897	5.6058			8.84733	4.97535
	8.9808	8.47303			9.02191	6.87441
	8.72397	7.88878			8.79659	6.40092
	9.51278	8.45498			9.03011	8.44746
	8.59774	5.39363			9.3568	6.81388
	9.08837	7.24194			9.20804	4.09434
	8.41141	3.627			8.99382	5.08016
	8.9919	6.52327			9.04258	4.96981
	8.24324	3.64806			9.26944	6.40754
	9.24573	6.00734			9.14209	7.62071
	8.94143	3.66868			8.67827	5.06006
	8.84991	6.38486			8.80425	6.49587
	9.3153	6.70245			8.92433	6.57925
	9.0119	4.76729			8.8317	3.96651
	9.11505	5.0186			9.83368	6.61097
	9.13644	6.06471			8.95585	3.93574
	9.0458	5.61167			9.12049	5.36035
	9.22639	5.98946			9.5497	8.21674
	8.74621	4.02535			8.95529	4.85826
	9.5357	7.12801			8.99973	5.92532
	8.94062	5.20181			8.82698	5.1885
	8.7359	5.15675			9.31195	6.27363
	8.82041	4.43082			9.32081	5.29832
	8.92251	4.85826			8.61487	4.53045
	7.8999	4.80729			8.87493	6.52562
	8.69377	3.70868			8.92836	4.60517
	9.19723	6.33363			8.6919	4.4403
	8.77489	3.21084			9.04814	4.24276
	8.84528	4.97535			9.36358	7.11379
	8.77431	6.60014			9.13824	5.84296
	8.91696	7.97412			9.38432	4.1957
	8.46181	5.6685			8.97384	3.64806
	8.93663	5.15675			8.82452	5.26579
	9.24477	5.17048			8.94532	4.82028
	9.37846	6.68761			8.83864	6.30481
	9.15862	1.97408			8.95617	4.56435
	8.68185	6.04406			8.98267	8.46312
	8.84617	8.1918			8.35776	3.03495
	8.56649	4.10759			9.48051	6.72479
	8.68856	6.2001			8.70586	7.36214
	8.05896	3.27336			9.15594	6.10301
	8.8968	6.9181			9.27927	4.75359
	9.1458	7.5807			9.26511	7.03033
	9.38681	7.62071			8.93247	6.01713
	9.44751	5.17502			9.23411	6.34071
	8.78651	6.30919			8.77431	5.73528
	9.9613	7.8487			8.9654	3.98155
	8.76931	5.14283			9.23683	5.50044
	8.83567	5.69036			8.86175	7.31695
	9.04463	6.5892			9.01951	8.65004
	8.89714	6.68561			9.79384	6.90615
	9.187	4.55598			8.56045	7.55423
	8.89621	6.87606			8.70576	5.79057
	9.0281	4.47734			9.08141	5.99745
	8.78205	4.42125			8.90222	6.56244
	9.23611	6.91652			8.69626	5.79301
	8.88357	5.71703			8.73988	4.36182
	9.2737	6.05912			9.22639	8.48285
	9.05533	4.60517			9.0836	6.35193
	9.41818	6.41149			8.52393	6.09942
	8.9725	6.21621			8.80509	5.26992
	9.02647	5.64332			9.37972	6.22575
	9.32347	7.97219			8.80964	5.63479
	8.90659	8.30539			8.58311	5.12871
	8.7356	4.7808			9.04799	4.4682
	9.58698	7.06783			8.91171	5.8003
	8.70524	4.66721			9.03957	5.5576
	9.24039	7.73088			8.77766	2.77259
	8.84688	4.93591			9.12062	7.46348
	8.82907	6.19032			9.04923	5.67126
	9.10159	7.37275			8.64194	6.71805
	9.23671	7.72347			8.48743	4.90082
	8.80704	4.53045			8.76748	6.87523
	8.96476	6.90535			9.19824	7.6603
	8.747	7.38026			9.23665	6.24456
	9.14554	4.48639			9.41242	6.73815
	8.95904	5.71439			8.7292	6.27363
	9.22523	5.20181			9.04104	6.91572
	9.10525	7.92761			8.2168	4.87672
	9.30012	4.47734			8.79274	4.8828
	8.93304	6.06657			9.40983	6.27815
	9.0447	5.06512			8.90643	5.91242
	8.81121	5.90808			8.91928	7.47079
	8.95856	6.32651			8.84644	6.36027
	9.17275	5.02388			9.2624	4.58904
	9.22541	6.02102			8.85841	5.88388
	8.87762	5.51986			8.81775	4.18358
	8.94911	6.11014			9.01831	6.11368
	8.7177	4.1957			8.83522	6.12249
	8.75953	4.90082			8.64161	6.16374
	9.34776	6.55108			8.7697	6.61633
	8.68448	5.99346			9.44359	8.04559
	8.82452	5.75827			9.08816	6.14676
	8.63083	6.42065			8.74532	6.22575
	8.89773	5.19739			8.33198	7.2829
	8.82543	8.06665			8.83873	2.91235
	9.12785	6.72191			8.76332	7.68708
	8.85629	5.64897			9.05735	7.41409
	9.12279	6.42325			8.54042	5.92104
	9.08718	7.0954			8.87502	5.56068
	9.01251	6.45394			9.16396	2.48491
	8.7995	5.49059			8.95136	7.38969
	8.857	4.06732			9.35782	5.77827
	7.76945	4.10759			9.12042	7.82277
	8.66691	4.63667			9.71048	7.81601
	8.93565	5.00797			8.99035	4.27667
	8.99874	5.98946			9.23023	8.29744
	9.23918	4.38203			9.01084	7.17196
	8.83197	0.875469			9.22211	8.4531
	9.00287	5.8861			8.53933	5.04471
	8.93353	8.30281			8.76361	4.21951
	8.87779	5.4773			9.07462	6.80771
	8.97603	7.21406			8.86043	3.68888
	8.87796	7.17687			9.29135	5.67949
	8.90466	5.00797			8.97752	7.01031
	9.22199	3.91999			8.60345	5.26992
	8.85999	6.50069			9.27713	4.99721
	9.01568	5.71439			8.75005	7.35295
	8.44262	5.48064			8.83513	3.53806
	9.1363	4.33073			9.47224	5.27402
	8.57108	5.69575			8.51837	6.35333
	9.12239	6.34493			8.97682	6.82089
	9.30881	5.40448			8.88485	4.44969
	9.26334	4.86445			9.13744	6.82263
	8.85629	5.5576			8.95649	6.08859
	8.83432	7.52575			9.37337	6.49224
	9.33684	7.08406			8.59969	4.83945
	8.58218	6.60881			8.68731	5.79788
	9.21837	7.37174			8.90373	6.46397
	9.06319	4.76046			8.88245	5.28624
	9.54306	5.43634			8.82925	7.14583
	8.99058	3.58352			8.96286	6.34774
	9.01485	6.39693			8.91554	3.44042
	9.27288	6.34634			9.303	5.68765
	8.783	7.56838			9.11988	6.65209
	9.71483	3.8712			8.31876	7.29383
	9.31642	7.54158			8.9631	4.09434
	8.79038	5.50044			9.03647	6.77445
	8.96761	5.54518			9.00561	4.37198
	9.01553	6.63961			8.67785	7.96943
	8.41045	4.57265			8.87952	7.59166
	8.99605	6.75227			8.77421	8.47437
	9.01921	7.54243			8.88751	8.11277
	8.96769	4.7185			9.33651	6.34212
	9.70841	5.08512			9.36655	8.11516
	8.95617	6.96376			8.9919	8.74027
	9.24609	5.26579			9.48074	5.38266
	9.05938	6.35611			9.27747	7.97191
	8.6107	4.45899			8.51539	6.16036
	8.88417	4.89485			8.97014	7.06236
	8.62561	5.57897			8.37577	4.82028
	8.76147	7.00161			9.1851	7.20756
	8.23752	3.44042			9.05613	5.36411
	8.70195	6.04025			8.99051	5.12871
	9.26282	6.82698			10.236	8.75627
	9.03994	6.14847			9.21652	4.62889
	9.08704	7.29546			8.82988	3.10906
	8.80704	4.1463			8.37492	6.16205
	9.03883	7.19263			8.67415	5.81949
	8.92482	5.76079			8.82816	5.25332
	9.00819	4.50424			9.07291	7.63666
	8.6438	4.18358			8.70985	6.5545
	9.0159	4.74667			8.62706	8.24465
	9.18198	5.24913			9.03994	8.12397
	8.64794	6.23206			9.51844	7.82596
	9.34424	7.16147			9.0447	5.47395
	8.60946	6.82958			8.71343	5.59099
	8.97038	5.52943			8.44835	7.98752
	9.77653	8.49405			8.66177	4.50424
	8.8101	3.70868			9.05533	5.89495
	8.78603	5.0186			9.16402	5.09987
	8.88202	5.70111			8.85115	7.55883
	8.86517	4.94734			9.15731	6.11545
	9.31463	6.42454			8.98571	6.7353
	9.13644	6.75786			9.2175	5.11919
	8.99528	5.53576			9.34679	8.15203
	8.81269	6.66747			9.20947	6.06657
	9.29756	7.97852			9.29733	7.19504
	8.64914	5.81473			9.30125	6.09221
	8.72023	4.24276			9.63713	7.88968
	8.80416	4.50424			9.02019	4.96424
	8.69502	6.14333			8.96492	7.31162
	8.86035	8.75109			9.12489	7.39609
	8.82415	5.4773			8.08222	3.36038
	9.02781	6.3956			8.41869	4.59714
	8.73819	5.16593			9.33613	6.42584
	9.06233	6.78627			9.27944	6.7372
	8.92482	6.30481			9.2549	5.17953
	9.05772	8.6939			8.90651	8.3632
	9.10827	7.30034			8.99475	7.38573
	8.97345	6.01713			9.04456	6.88918
	8.83837	6.15698			8.85629	6.56131
	8.76979	5.49059			9.06613	4.27667
	9.17069	6.2178			9.53941	8.37342
	8.98648	6.63857			9.13403	5.90154
	8.90424	3.70868			8.46547	7.7562
	8.94394	6.12074			8.96159	7.06236
	9.14262	7.74205			8.85806	6.82263
	9.31664	4.6747			8.56092	6.24144
	8.74729	6.34774			9.08627	6.77719
	9.03537	8.6008			8.92565	5.8545
	8.96698	5.09006			9.17507	4.30946
	8.70709	5.94017			9.26646	4.70411
	8.90785	5.8003			8.83188	7.04438
	9.18503	7.66331			9.74884	5.50696
	9.10868	3.68888			9.2259	7.21465
	8.82004	8.29225			9.10504	4.93591
	9.3148	7.02678			8.92853	6.23676
	8.69315	6.45646			9.23484	8.52722
	8.70811	7.38573			8.41182	5.04471
	9.23393	5.95064			9.03611	5.03955
	8.50214	4.09434			8.99943	5.36035
	8.95288	4.53903			9.30942	7.00234
	8.63513	7.92154			8.99536	6.9377
	8.67964	4.99721			8.78906	5.56068
	9.0119	5.68222			9.25009	8.1024
	9.37121	6.72191			9.08049	5.97126
	8.79903	4.75359			9.16571	5.87493
	9.27498	4.62889			8.74374	5.7301
	9.05272	7.25503			9.3623	7.18962
	9.01069	6.23519			9.45753	5.67949
	8.8957	7.47079			8.91978	5.59397
	8.04851	3.99636			8.76079	8.47002
	8.82643	5.90373			8.71271	5.2575
	8.65413	5.42583			8.98919	6.77262
	9.05901	8.96761			9.15115	7.54115
	9.21689	8.7244			8.7005	6.87192
	8.85435	4.60517			9.09187	6.87771
	9.60811	6.98915			7.95881	6.25996
	8.65629	6.10122			9.01741	5.29029
	9.12347	4.8828			9.28521	5.71966
	8.75631	3.03495			8.92524	4.7808
	8.79236	5.30629			9.22346	6.70343
	8.49049	5.21927			9.0593	8.2526
	9.41394	6.6238			9.06348	4.32015
	9.14686	6.95005			8.70534	7.94902
	8.58867	6.57368			8.66574	3.95124
	8.38812	7.65236			9.33804	5.80754
	9.11491	6.37944			8.81508	7.26347
	8.47496	6.98694			8.93247	5.5037
	8.62761	3.90399			9.14798	8.54761
	8.80686	5.38633			8.99413	6.23363
	8.93394	7.78055			9.04938	8.35984
	9.35164	5.43634			8.89451	4.7808
	9.01001	4.91852			8.87874	4.15888
	8.36124	5.20181			9.36613	6.0249
	8.78632	6.48738			8.8268	7.29166
	8.68322	5.51343			9.08514	8.49568
	8.95425	8.42332			8.68689	5.46722
	8.95888	7.27573			9.33361	6.21461
	9.32955	6.06843			8.80127	5.37528
	9.31792	4.86445			9.02929	5.45018
	9.05598	6.01908			9.01251	6.27664
	8.9826	7.35347			9.12062	7.37073
	9.79912	7.03808			8.48819	2.34181
	8.79641	8.09609			9.20131	7.93509
	9.0284	7.80792			9.22413	5.585
	9.61421	6.30189			8.76931	4.90082
	9.20106	5.79788			9.09903	3.8373
	8.70904	4.12066			8.91112	5.91674
	8.53544	7.40148			8.82589	5.89275
	8.62561	5.2575			8.89544	5.34138
	9.13202	6.23363			9.10083	6.61526
	9.06484	5.31419			8.85638	4.61314
	8.60436	4.61314			8.79687	5.05497
	8.83495	6.8086			8.85488	5.44328
	8.78727	6.34634			8.45945	5.11439
	8.53495	7.68708			8.85266	5.97737
	9.06635	6.44508			8.49163	3.6055
	8.97282	5.8313			8.89765	6.71805
	8.87563	4.82671			9.06713	6.11545
	9.26493	7.65083			8.67415	5.31025
	9.06706	7.18599			9.04952	5.17048
	8.69054	5.13815			8.98065	6.9377
	8.69471	7.53775			9.35476	5.66296
	9.09868	6.08859			8.81158	4.99721
	8.88965	5.81949			8.72326	4.10759
	8.94871	6.06471			8.79453	4.96981
	9.36448	7.50659			9.08851	4.78749
	9.08479	6.25996			8.58531	6.7532
	8.93574	7.43035			9.015	7.05549
	8.88348	3.98155			9.0255	2.48491
	9.43441	5.89495			8.87926	6.65518
	8.79274	5.27402			8.81527	7.11704
	8.76526	7.80694			9.1349	7.86634
	8.80648	6.06099			9.09333	4.06732
	8.89238	4.56435			9.41555	5.22789
	9.11906	6.52092			8.96619	6.79615
	8.86745	5.17953			9.25869	5.9733
	8.9424	5.31812			9.14296	4.55598
	9.00111	6.36716			8.97971	8.01539
	8.4622	5.69575			9.66832	6.42843
	9.06527	7.71708			9.68238	8.63523
	9.55094	5.73528			9.31228	6.11368
	8.84982	4.88884			9.12056	6.34634
	8.79716	3.24259			8.84697	4.26549
	9.07873	7.47579			9.10124	7.74829
	8.79622	5.66573			8.85461	6.8973
	9.28314	7.3509			8.97305	5.88388
	9.03898	5.88832			9.20049	5.59397
	9.08437	3.51453			9.49026	7.80106
	9.16778	5.64332			9.06247	7.21406
	9.17519	5.30629			9.12435	6.44127
	8.66798	4.43082			8.96674	6.84843
	8.75456	5.78074			9.78466	8.00717
	8.90752	6.92834			9.08247	5.8522
	8.71648	5.73269			9.08042	4.74667
	8.83963	0.470004			8.86465	6.38755
	8.62872	4.27667			9.24321	5.14283
	8.69315	3.85439			8.96223	5.86136
	8.79565	6.61847			9.37131	3.88773
	9.23762	7.70634			8.67859	6.27363
	9.22033	5.84064			8.80052	6.66134
	8.85018	4.86445			9.90203	7.37375
	8.9508	7.68671			9.42994	5.24069
	9.01122	4.80729			8.93655	5.26579
	9.31111	6.65209			8.46299	5.45703
	8.63711	5.86817			9.47381	4.70411
	8.86719	6.26606			8.70524	4.43082
	8.86087	8.29904			8.45629	6.83303
	9.12421	7.66331			8.75758	6.69258
	8.56908	3.8373			9.35792	6.80594
	9.00683	5.31419			8.95007	3.56105
	8.54441	0.470004			9.08746	7.3233
	8.50478	5.588			8.87511	7.02037
	9.10999	6.77992			8.88167	6.77537
	8.37492	5.27402			8.77967	6.92442
	9.25975	6.23048			9.10862	5.37528
	9.12691	5.28624			8.98625	3.30322
	9.11471	8.20609			9.25709	6.2691
	9.40922	7.28674			9.08071	4.89485
	9.3143	7.01679			9.55023	5.02388
	9.00019	5.46722			8.65175	3.27336
	9.41692	6.05725			8.86246	6.05725
	9.31798	5.31419			8.55831	6.52327
	8.99051	5.71175			9.74761	7.93164
	8.83206	7.31535			8.84795	4.58088
	8.56448	5.65179			8.89067	7.73578
	9.11757	7.63395			8.94887	7.46851
	8.98811	5.83831			9.06297	5.71703
	9.04624	5.68765			8.78043	4.44969
	8.81093	5.14283			9.06541	7.08137
	8.83152	5.33368			9.1462	4.99721
	9.08085	7.94789			8.55616	6.71901
	9.07675	7.79943			8.92927	7.53562
	8.76264	4.08092			8.8555	6.18867
	9.36326	6.32077			8.79809	7.8758
	8.83495	7.23562			8.71312	6.67355
	9.51776	7.26459			8.96666	6.80506
	8.82151	5.74812			8.92614	6.43101
	8.85567	6.21461			8.70391	5.66296
	9.01793	7.0651			8.6579	4.33073
	9.50851	8.27995			9.02609	6.10479
	9.27213	6.76987			8.19787	6.62061
	9.04404	8.09169			8.87943	5.93384
	9.00142	5.08016			9.092	5.71175
	8.88296	5.87493			8.89689	8.27589
	9.33771	8.51431			8.87848	7.04856
	8.7282	4.77407			8.65823	3.17805
	8.9939	6.08131			9.33514	7.27184
	8.89289	7.04925			8.76089	6.50668
	8.96151	8.03113			8.94879	8.12065
	8.63016	6.05538			8.75875	6.7625
	9.01696	7.5369			9.24213	4.98634
	8.68637	2.61007			9.02131	7.95802
	8.90331	8.15364			9.08837	6.19848
	9.48065	7.2922			9.09841	8.21566
	8.74374	8.20237			8.88124	4.61314
	8.97337	4.7397			8.91237	4.63667
	8.75573	6.75972			8.59843	6.87275
	8.89663	6.04784			9.04865	4.86445
	8.84232	5.83598			9.22889	6.31789
	8.79584	2.99573			9.26352	4.13357
	9.75126	7.03527			8.78357	4.76046
	8.57647	5.47395			9.50758	7.3887
	8.91087	8.56895			8.91137	5.06006
	8.85426	5.84759			9.47576	5.9548
	9.02572	6.2492			8.93606	7.13122
	8.91579	5.82186			9.15875	5.39726
	9.30661	7.73823			9.20068	6.7132
	8.81149	4.7185			8.7668	6.96224
	8.71658	4.47734			8.66295	4.72562
	8.85797	7.21642			9.11784	7.20341
	9.04587	8.58118			8.79462	4.45899
	8.85656	1.8563			9.26205	5.89935
	9.1851	5.92319			9.18631	6.21621
	8.729	6.63647			9.0533	5.37528
	8.70463	6.49103			9.22871	6.63961
	9.36187	7.68451			9.01251	6.10658
	9.34992	7.49998			8.87978	6.63121
	8.9654	4.05352			8.35819	6.46646
	9.07526	4.03954			8.71851	6.27212
	9.0091	8.55287			8.75924	5.585
	8.83873	5.67401			8.67647	7.88186
	8.4639	6.5419			9.08	5.47395
	9.02064	5.71703			8.63381	7.1293
	8.91112	4.13357			9.1784	4.62104
	8.97376	6.48981			9.3476	5.41165
	8.58993	5.6685			9.41787	5.90373
	9.08725	5.48397			8.97729	4.93591
	8.7767	8.28561			8.73988	8.2111
	8.1612	4.30946			8.8101	3.96651
	8.80713	4.56435			8.83721	4.93591
	8.67563	6.63542			8.96111	6.95693
	8.6578	4.85826			8.88107	6.19032
	9.21343	8.84379			8.74384	7.88096
	9.02303	6.44889			8.94556	6.34212
	8.96769	8.46396			8.84804	7.40391
	9.01281	6.24766			8.85302	8.08653
	8.9736	3.91999			9.45462	6.66032
	8.86684	5.24069			9.79221	7.06851
	9.21529	6.19848			8.76844	6.79794
	8.87571	6.36165			8.99459	6.03452
	9.75598	6.11722			9.3701	7.22052
	8.96095	7.5989			9.14475	4.62104
	8.59843	4.61314			8.66563	5.8003
	8.9323	8.14323			8.6474	6.40886
	8.43538	3.41444			8.88965	5.12871
	8.85186	4.49536			9.28037	4.12066
	8.87952	5.34901			8.87085	7.10988
	8.599	5.62906			9.01861	5.10473
	8.67869	7.96081			8.93639	4.98634
	8.88768	5.34901			9.45195	7.65842
	9.27119	7.72206			9.09082	4.62889
	8.75358	5.56068			9.09333	5.97534
	9.09249	7.35654			8.76487	5.26579
	9.17993	6.24766			8.86184	6.54765
	9.3253	6.99283			8.79584	4.24276
	9.51566	7.15586			9.14963	6.30042
	9.42099	7.24194			9.25567	4.17131
	8.9282	4.4682			9.26311	3.14415
	8.71546	7.7507			8.99174	7.11899
	9.02026	6.10122			8.99367	4.56435
	8.8678	5.0133			8.80723	7.29926
	9.0562	6.18043			9.20293	5.743
	8.89604	5.0186			9.37105	5.4773
	8.95152	6.48372			9.4247	7.00814
	8.88098	5.81949			8.46521	4.08092
	8.9076	4.69684			8.64183	5.76582
	8.82907	6.61419			8.90019	4.60517
	8.89544	5.4773			9.32867	5.08016
	8.97124	5.02913			8.83441	4.32015
	8.53848	5.89495			8.89621	5.85908
	9.21923	6.28413			8.25427	1.16315
	9.15646	6.33079			8.92482	6.18374
	9.46043	5.78074			8.89127	6.36303
	9.52081	5.92532			9.15456	5.14283
	8.87363	6.09402			8.86815	6.85267
	9.1175	8.02956			8.80342	6.32221
	8.91721	4.44969			8.91229	6.88674
	9.29551	8.58896			8.98532	4.96424
	8.79575	8.38936			8.94685	7.68193
	8.69916	7.85833			8.83684	6.2886
	8.95264	4.21951			8.98555	5.74556
	8.75211	7.71495			9.19999	5.2575
	8.48679	6.01713			8.94911	6.63121
	8.61633	3.8373			9.67672	6.296
	9.14666	6.4886			8.76438	3.36038
	8.88648	4.75359			8.72457	8.389
	9.16083	7.47986			9.50422	7.0934
	9.2329	5.09987			8.61442	5.31419
	8.80248	5.81473			8.46128	3.27336
	9.25038	6.95693			9.22468	3.6055
	9.3065	7.6933			8.81259	6.55905
	9.07653	5.05497			8.6525	6.30773
	8.97345	5.67126			9.14083	6.49345
	8.80062	5.40448			8.80825	4.55598
	9.37337	4.72562			9.17782	7.21993
	9.2546	6.37809			9.07866	7.93994
	8.90961	8.17684			8.74453	4.87672
	8.29967	6.65621			8.48487	8.10434
	8.99705	6.61419			8.93148	3.38777
	9.41838	7.59085			9.21028	5.19739
	8.97556	5.66573			9.0562	6.97803
	8.5467	5.02388			8.75014	5.68494
	9.27736	6.25843			8.70985	4.74667
	8.96071	8.44178			9.17462	8.1596
	9.44265	6.47512			9.46082	6.19032
	8.86972	3.58352			9.33317	5.77331
	9.03839	6.4128			8.84035	4.44969
	8.7316	7.70994			8.96975	7.17992
	8.82306	3.90399			9.44447	7.31695
	9.22615	6.25229			9.19024	5.5483
	8.85417	7.59368			8.49316	6.23363
	9.18249	5.99146			9.04404	3.99636
	9.1903	5.76832			8.72669	6.18539
	9.13704	5.68765			9.06182	7.0954
	8.40199	7.36518			8.89714	7.84651
	8.87632	7.13186			8.51489	5.0133
	8.79753	6.126			9.22779	4.15888
	9.0447	3.36038			8.97234	5.69575
	8.79547	4.86445			9.08226	6.95464
	9.12293	4.57265			8.51676	4.24276
	9.0008	4.15888			9.07433	6.57591
	9.29512	7.80008			8.55497	4.47734
	9.46318	7.04438			8.59166	4.12066
	8.95968	8.16417			9.024	6.79883
	9.09702	6.65518			9.03957	6.01518
	9.18045	5.70111			9.25484	4.58904
	9.12157	2.48491			9.23888	6.40886
	9.55442	4.76729			8.70432	6.99357
	8.56152	4.61314			9.09465	6.72671
	9.14831	6.5903			9.25235	6.05538
	8.79236	6.65724			9.2215	7.20816
	9.04221	7.38075			9.04023	5.92532
	9.03174	5.29431			8.90676	7.1872
	8.49987	4.4403			8.74847	7.03527
	8.82689	5.98343			9.32031	7.60489
	8.92713	5.51986			8.61127	5.29431
	8.50753	3.8373			9.21996	4.35157
	9.17885	7.53048			8.91363	8.29305
	8.8934	4.24276			8.66627	4.1957
	8.98811	3.98155			8.80472	3.627
	9.26599	5.96512			8.77957	6.45394
	8.92631	5.67949			9.12833	7.80466
	8.86561	4.86445			8.56211	2.8679
	8.98127	4.85203			8.78052	4.09434
	9.71917	9.356			9.60326	7.51796
	8.90399	4.44969			8.78528	6.02102
	8.91012	4.75359			8.56092	4.68951
	8.75289	5.67675			8.83115	5.77331
	9.19421	6.20496			9.63064	7.18053
	8.91154	2.66723			9.24812	5.57897
	9.36102	8.74894			9.21806	7.57497
	8.69564	5.588			9.11245	7.37826
	8.49898	5.81711			8.86281	8.68203
	9.05504	7.40683			8.92193	6.78536
	8.61386	5.39726			9.21935	6.41673
	8.92449	3.46574			8.88159	6.296
	8.58705	7.30573			8.93083	4.39198
	9.30723	8.35345			8.9368	5.19296
	8.78347	6.60232			9.00789	6.17045
	8.8075	5.17953			9.12211	5.76582
	9.1844	3.91999			8.92557	7.31002
	8.92787	8.41361			8.98578	7.04299
	9.05424	6.12949			9.20997	4.90082
	9.1594	5.84528			8.78252	4.63667
	8.6392	4.50424			9.28929	7.35244
	8.98547	5.91242			9.02773	6.296
	9.54634	6.72479			9.09757	4.53903
	9.03611	2.91235			9.04353	4.52179
	9.35792	7.1293			8.53665	6.18043
	8.52319	6.58036			9.13349	5.83364
	9.34781	5.82895			9.2748	6.29305
	9.12211	4.87061			8.90458	7.2998
	8.75465	2.99573			9.914	6.63227
	9.01846	4.60517			8.80852	7.51185
	8.74443	5.48064			9.68635	6.6886
	9.19623	5.56375			9.12266	5.49717
	9.59477	4.10759			8.90188	4.79414
	8.58693	4.41159			9.19377	5.8313
	8.74364	6.40092			9.30869	4.65205
	8.97423	5.88832			8.97791	4.98086
	8.7341	4.6747			9.11238	3.49043
	8.83711	4.28772			8.95023	7.11444
	9.10263	6.5859			8.57904	4.1463
	8.94143	4.71133			8.63788	4.96981
	9.03293	5.5037			9.1499	6.5465
	8.98919	5.83364			8.75024	6.43487
	9.426	7.40245			9.19503	3.99636
	8.90945	6.28114			9.09194	6.19195
	9.75418	7.69585			8.92968	6.08131
	9.11232	4.92435			8.98617	5.14283
	8.91613	3.36038			8.86736	4.29865
	9.1069	5.31812			9.22749	6.08131
	9.35648	8.38517			8.99282	4.94164
	9.00088	8.34873			8.36976	5.27811
	8.7934	5.70378			9.19824	5.2575
	9.024	5.88165			9.46631	7.7031
	8.67404	5.12871			8.7286	4.93015
	8.86552	6.4886			8.7525	3.7281
	9.13269	7.57415			9.625	5.92532
	9.0549	8.62508			9.13684	7.92125
	9.20231	5.10958			8.52872	4.1957
	9.01786	7.28947			9.27863	5.39726
	8.81711	5.0186			8.61036	4.77407
	8.82952	5.51343			8.47548	4.02535
	9.06942	5.44674			9.33356	5.06512
	8.95473	5.29832			9.23677	5.11439
	9.4904	6.96904			8.69169	8.86084
	9.18325	6.49708			9.24081	7.26066
	8.7849	4.82671			9.30779	4.05352
	9.21781	5.82659			8.76011	6.07397
	9.04133	6.95158			9.21319	3.90399
	8.94854	6.03644			8.7901	6.22416
	9.13997	6.00339			8.78878	2.7213
	8.97211	4.55598			8.82059	6.47636
	8.55569	6.82176			8.62905	5.23644
	8.86228	6.4677			9.9449	5.34901
	8.81885	4.17131			9.0156	6.35472
	8.93565	4.47734			9.07639	5.07016
	9.5553	6.75414			9.04324	3.93574
	8.99375	6.13988			9.25193	7.25954
	8.47107	3.80221			8.99705	6.26454
	9.65549	4.20767			9.18998	5.78074
	8.9699	6.72479			9.35164	5.29029
	8.77967	7.33014			9.19175	3.53806
	8.59178	5.38633			9.01221	6.77262
	9.06398	4.8331			8.80556	3.80221
	8.91321	7.00524			9.07149	6.44127
	8.5781	6.84247			9.48485	7.93222
	9.36171	4.55598			8.7281	4.80729
	8.77297	6.34212			9.07717	4.3412
	8.41045	5.23218			9.91044	5.31419
	8.90668	5.8003			8.23225	5.46722
	8.84724	4.96424			9.00233	4.30946
	8.57857	4.75359			8.9282	4.78749
	9.30441	6.0535			9.02341	7.07259
	9.06577	5.14749			9.7142	5.51665
	9.20767	8.47002			9.1038	6.3889
	8.974	6.69456			10.0466	8.91935
	9.66981	7.74136			8.69242	4.15888
	9.03167	5.86817			9.01462	8.62623
	8.74394	5.35659			9.09535	5.45361
	8.93907	6.71901			9.15338	5.81234
	8.98757	6.11898			9.21201	5.90591
	9.3675	5.5037			8.72407	2.34181
	8.7337	6.95997			9.29163	5.12871
	8.80407	5.96717			8.80379	6.55791
	9.24758	7.28619			9.14143	5.08512
	8.81453	5.32593			9.90525	6.6896
	8.67085	4.82028			9.03285	6.87358
	9.03927	6.25383			8.96627	5.96307
	9.21362	7.37676			8.37277	3.81991
	8.68154	6.19032			8.71892	7.83645
	9.07213	5.98545			8.77335	6.66237
	8.72033	7.48302			9.55098	7.59569
	8.71006	4.64439			8.78651	4.78749
	8.86421	5.27402			9.05236	6.84332
	9.64286	9.18391			9.02266	6.05538
	9.25146	5.89275			8.66542	5.53891
	8.83784	5.29832			8.75142	6.04216
	8.71434	7.25672			8.82461	4.91852
	9.12232	7.33954			8.82151	4.90676
	8.68846	6.45897			9.14514	4.96981
	9.25443	6.06099			8.18031	4.06732
	8.7324	6.17545			8.86184	5.44328
	9.12232	5.86817			9.25187	8.50382
	8.57448	6.36853			9.2511	6.59796
	9.23484	8.10627			8.98904	5.71966
	8.60163	2.95491			8.8738	5.47395
	9.06419	4.51305			8.99051	5.46722
	8.61115	3.10906			9.11974	6.93925
	8.58867	4.54754			9.0447	9.13966
	8.90928	5.84528			9.10152	6.09221
	8.71902	5.59694			8.88494	4.92435
	9.06103	4.63667			8.80788	4.1957
	9.33728	7.6293			9.49119	7.0807
	9.14302	7.0854			9.30577	5.12396
	8.58357	5.95687			8.83522	6.20334
	8.55078	5.65179			9.36347	5.6175
	8.87692	5.81473			9.16168	5.31812
	8.65488	7.49554			8.95272	7.62657
	9.06103	7.1414			8.6006	6.62592
	8.57939	3.64806			9.65478	7.231
	9.08345	4.60517			8.87934	3.68888
	8.73819	6.12074			9.00584	6.89487
	9.13943	6.79526			8.98361	8.03372
	9.18726	6.13988			9.25229	5.8003
	8.9654	6.243			9.46265	6.76342
	9.14256	4.89485			8.77258	5.17502
	8.54634	4.72562			9.1493	5.5326
	9.68454	7.33276			8.79819	6.756
	9.05156	4.60517			8.73948	5.66573
	9.34207	6.83475			8.6255	4.76729
	8.92177	6.42714			8.77976	7.33694
	8.76312	4.20767			8.93924	6.91968
	9.00325	4.3412			9.48193	6.39158
	9.52995	7.88758			8.57014	5.63764
	9.03537	7.02108			9.08183	8.24486
	9.18948	7.90012			8.44981	4.73268
	8.92828	5.44328			9.27875	7.08807
	9.39432	6.61847			8.95457	7.00959
	9.21633	7.7476			8.96619	4.29865
	8.8821	7.64855			8.65941	5.26579
	9.20099	6.62167			8.74985	5.50696
	8.93132	6.67557			9.19434	5.82659
	8.54175	5.09498			8.61914	7.47079
	8.62672	4.10759			9.883	5.75067
	8.76002	5.40807			9.70206	5.03435
	8.83729	5.46722			9.0347	4.98634
	9.09235	6.78174			8.77556	3.66868
	9.27962	7.09074			8.62316	4.47734
	9.04133	7.53434			8.97666	5.96717
	8.76128	4.97535			9.23502	7.67749
	8.63094	6.17212			9.33957	5.14283
	9.25686	7.67971			9.02892	5.38633
	9.03891	6.87275			9.01921	4.21951
	8.83197	6.67254			9.58476	7.24879
	9.07653	5.38633			9.14567	7.16889
	9.26323	7.1787			8.87891	7.91015
	9.02885	3.27336			8.11259	3.93574
	8.90466	5.56068			8.71485	3.64806
	9.22076	6.44254			8.74077	8.33979
	8.84635	4.49536			8.9259	6.36165
	9.10166	6.83217			9.06506	6.25229
	9.03285	7.7002			9.13309	6.86276
	9.22205	6.64275			9.3158	6.75414
	9.06649	6.35611			8.39809	6.07028
	9.09124	8.52643			9.12819	7.18417
	9.40152	6.43999			9.18884	6.66441
	8.5467	4.13357			8.42632	6.2001
	8.90836	2.7213			8.84223	6.38755
	9.12225	5.24069			8.52257	6.16877
	9.24111	6.83303			9.16031	6.29895
	8.75093	5.49388			9.11947	4.37198
	9.11798	7.11509			8.77709	3.44042
	8.91912	5.83598			9.13262	7.07327
	9.28423	8.55333			8.91087	6.08495
	8.47973	4.32015			9.44093	5.5483
	8.90298	6.59796			8.99805	5.06006
	8.83369	4.7397			8.66145	4.68213
	8.97682	5.14749			8.83639	5.80272
	8.90894	3.58352			9.2594	4.03954
	8.58786	5.49388			8.87041	4.59714
	8.92292	5.90373			9.27003	3.99636
	9.22425	5.72489			9.30447	6.33363
	8.96238	6.1347			8.54946	4.89485
	9.05156	6.67355			9.11149	5.40087
	8.80537	5.46383			8.51477	5.9733
	8.94887	8.27344			8.96175	4.24276
	8.95713	5.03435			9.3546	7.9848
	9.04397	6.07948			9.01816	4.55598
	8.77345	5.32982			8.82443	5.8313
	8.9922	4.35157			8.99428	6.52679
	8.90819	-0.223144			8.81065	5.83364
	9.0702	5.91242			9.51039	5.37528
	9.03345	7.50966			8.67827	7.99645
	8.50075	4.38203			9.32618	7.86818
	8.8049	8.57637			9.16448	5.84759
	8.74788	4.73268			9.01936	6.63857
	8.7181	5.24913			9.39406	8.57561
	8.87718	5.0186			8.49999	4.41159
	8.74067	4.65205			9.31981	6.78897
	8.7343	4.68951			8.95088	4.57265
	9.25768	6.5465			9.02116	6.51382
	9.02632	6.74665			8.96579	5.02913
	9.03367	3.41444			9.23635	4.68213
	9.1775	7.58761			8.84134	4.76729
	8.94475	5.22789			8.93997	5.52943
	9.09611	3.98155			8.85408	6.61633
	9.44501	5.87942			9.23683	5.77579
	8.53104	5.38998			9.04952	7.56797
	9.03905	6.08131			9.28123	7.02251
	9.61384	6.12949			9.05287	3.93574
	9.21201	7.51839			8.9929	6.38621
	8.93916	5.43634			9.29705	7.20102
	8.86272	7.91863			9.41621	7.78987
	8.63204	4.74667			8.79067	5.7091
	8.62994	6.33363			8.69792	4.8828
	9.37763	4.97535			9.0406	4.38203
	8.81324	6.243			9.11573	4.87672
	8.60799	7.91074			8.50779	5.68222
	8.93802	6.62167			9.26733	6.74194
	9.70149	7.70706			8.72679	5.19739
	8.87718	3.6055			9.01062	6.53727
	8.95737	7.47806			9.06706	7.33589
	8.92697	6.01127			8.63524	5.32593
	9.45092	6.87275			9.05916	6.83303
	8.72588	6.42843			9.23786	7.18235
	8.89212	8.69497			8.78868	6.59905
	8.59109	4.7185			8.9871	9.96127
	9.24207	7.49998			8.70658	6.18208
	9.58642	7.60927			8.82771	6.45015
	9.15502	5.34138			9.19962	5.51343
	8.68175	5.99943			9.00302	6.587
	8.61363	3.8712			9.2661	6.10658
	8.34841	4.44969			9.47257	8.45617
	9.0113	5.39726			8.95417	5.82659
	8.8434	5.70111			9.22761	4.58904
	9.15121	7.07665			8.81259	6.32794
	9.20593	7.57086			8.53398	4.33073
	8.68521	3.95124			9.23168	5.60286
	8.84465	5.37898			8.96927	5.79788
	8.63579	5.06512			8.80825	7.07868
	8.84134	5.11919			9.07256	1.56862
	8.56672	8.0225			8.79378	7.51185
	8.72256	4.21951			9.05699	6.02683
	9.06985	8.16485			8.9919	6.75693
	9.15568	5.84064			8.74126	4.85203
	9.05185	7.3385			9.18211	5.6685
	8.91529	5.39726			8.59511	8.00876
	9.11974	6.82785			8.58959	5.08016
	9.03699	4.38203			9.39757	7.45749
	8.6403	4.88884			8.97517	7.52186
	8.5358	6.20819			8.94483	6.36441
	8.85938	4.8828			8.75904	4.03954
	9.33301	6.51619			9.20225	6.4677
	9.09465	6.93925			9.53722	8.40326
	8.79462	4.73268			8.95064	6.37537
	8.57857	6.74946			8.97242	5.27402
	8.62014	5.51986			8.60572	5.93171
	8.98423	6.95005			8.66862	7.13569
	8.82752	8.07838			9.09577	5.48397
	8.85726	7.80401			9.16051	8.47754
	8.9684	6.82698			8.88751	5.80513
	9.18491	6.57032			9.10593	6.31933
	9.2695	7.25672			8.9623	7.50966
	9.06556	4.40183			8.84929	5.71439
	8.54934	5.17048			9.20068	6.97728
	9.08183	4.1957			8.839	5.04471
	8.48883	6.6174			8.75963	5.15213
	9.2143	4.80729			9.27387	4.57265
	8.7362	4.32015			8.734	6.53029
	9.23647	8.35552			9.25567	7.0541
	8.86526	4.71133			9.28975	4.36182
	8.47457	4.48639			9.28331	7.24366
	8.57378	5.78074			8.8172	8.51286
	8.77056	7.65463			9.02049	6.37537
	9.0439	4.88884			9.09187	6.82611
	8.79246	5.88832			9.23484	7.62735
	9.21861	7.93795			9.21288	7.75311
	8.6872	4.08092			9.06312	3.66868
	9.18019	8.3879			9.19616	7.55045
	8.94054	5.32593			9.37752	7.23965
	8.8022	5.29832			8.75083	5.91242
	9.02139	6.4886			9.0575	7.37676
	9.53399	6.6886			9.22272	5.55141
	8.88331	2.99573			8.81112	5.82186
	8.92259	6.18867			9.14003	5.24069
	8.91604	4.66721			9.08416	4.43082
	9.04229	5.02388			8.88331	6.126
	8.93459	6.43101			9.19522	7.43319
	8.74778	7.2046			9.11355	5.97534
	8.6499	4.28772			8.86806	4.74667
	8.94224	4.53045			10.0146	5.46722
	8.9714	7.55841			9.21874	7.68267
	8.78868	6.51501			9.27805	4.82671
	9.41848	8.88406			8.92984	6.72575
	8.83675	4.40183			8.93304	8.42631
	8.68059	6.57703			9.30266	6.31644
	9.08085	6.61097			9.35261	4.86445
	8.95585	5.11919			8.27959	6.07948
	9.05482	4.18358			9.0156	5.7301
	8.60606	7.08473			9.01876	4.26549
	8.8698	4.83945			9.49002	6.90455
	8.34045	4.85826			9.57422	6.56808
	8.96532	4.65966			9.16836	7.52833
	8.95112	6.67658			8.9508	6.67355
	8.80621	3.21084			8.94175	5.28219
	8.56542	5.28624			8.95737	6.49224
	8.83152	6.14504			9.04828	7.01894
	9.09354	8.73565			8.95377	7.25333
	9.21935	7.04438			9.01462	7.78122
	9.11525	4.96424			9.04624	3.66868
	8.74295	3.58352			8.76109	3.10906
	8.8614	4.1463			9.41059	6.87192
	9.11723	7.11509			8.78831	6.39826
	9.0493	6.03835			9.21461	8.71735
	9.40815	6.27815			9.18414	5.6685
	9.43273	6.15188			8.86876	7.64473
	8.95872	5.6685			8.74047	5.45703
	9.11872	5.59694			8.95649	5.02388
	9.12157	4.4403			9.17301	5.0133
	8.795	5.16593			8.60968	6.21621
	8.59786	4.68213			8.88055	5.84296
	8.72588	6.33079			8.88845	6.42972
	9.1596	6.79705			8.9102	3.70868
	9.1581	9.32837			9.18325	8.71144
	8.99228	5.42583			8.64435	6.39426
	8.70288	3.88773			8.65099	7.16457
	9.18751	6.06099			9.30374	6.90776
	8.96714	6.13296			9.06384	7.46897
	8.53153	5.62906			9.07049	3.76584
	8.85955	8.23345			8.91279	5.52943
	9.22901	8.58821			8.67085	4.21951
	8.95665	5.17502			9.03204	6.1347
	9.13884	5.09498			9.09986	1.38629
	8.82861	8.37931			9.50708	7.67304
	9.03773	7.16209			8.81398	7.11574
	8.91488	6.68261			8.68689	5.20181
	8.73729	4.82028			9.36496	5.69575
	8.33003	4.80074			9.07518	4.1957
	8.89917	5.90373			8.37777	4.75359
	8.88862	6.78265			8.8725	7.12416
	9.11211	8.33			8.95976	8.29325
	8.65737	2.91235			8.5659	6.03261
	8.64227	5.69843			9.02348	5.73528
	8.87485	6.20496			8.98096	5.41876
	8.95617	5.59694			9.36819	6.16205
	8.97823	6.63121			8.9758	5.6204
	9.28745	4.91852			9.13189	6.10479
	8.74216	4.20767			8.73888	4.27667
	8.9394	6.94003			8.7569	6.65209
	8.72246	6.56357			8.00993	4.59714
	9.38666	7.29492			8.83016	6.14847
	8.41965	5.14749			9.03927	4.41159
	9.14871	2.26176			9.12866	8.11803
	8.70555	3.68888			8.71557	6.11368
	9.11019	5.25332			9.1877	5.27402
	9.05461	7.25616			8.79161	6.0904
	9.79557	7.1695			8.92573	7.90249
	8.62706	6.27363			8.55581	2.66723
	8.61431	3.38777			9.01319	-0.223144
	9.28992	6.3575			9.67839	6.63857
	8.74453	5.98141			8.95015	7.58274
	8.8725	5.09987			9.05642	5.64615
	8.75534	6.22099			9.30819	6.31644
	9.06613	4.1957			8.92317	7.69038
	9.0069	5.86136			9.45467	7.1596
	9.17885	6.55336			8.88794	2.54945
	9.09951	8.36711			8.69336	5.91889
	9.08198	6.31933			9.54337	7.49998
	8.4864	5.27402			9.22015	4.37198
	8.89434	3.81991			10.0215	7.20993
	8.7345	1.16315			8.8009	5.70645
	9.10786	5.79057			8.84026	5.14283
	8.86035	5.89275			8.61307	7.95997
	8.86605	5.10473			9.06706	6.79077
	8.8678	5.47059			8.22464	7.45888
	8.63898	5.19296			8.77823	4.3412
	8.89357	6.5647			9.05134	4.56435
	8.95928	6.20496			9.42855	6.04784
	8.97987	6.12074			8.89994	3.8373
	8.99682	7.03808			9.18612	6.14333
	9.06463	8.2015			9.06677	6.74571
	8.7292	5.87493			9.16149	6.98323
	8.79142	5.42583			9.02191	3.76584
	9.86387	8.21045			9.40111	5.38998
	9.10951	6.2114			8.74739	8.39769
	8.67626	6.03644			8.73779	5.70645
	8.84322	8.50706			8.90827	4.73268
	9.29637	6.70539			9.01507	4.43082
	9.18402	6.587			9.37384	4.08092
	9.59355	7.30894			8.96445	6.69357
	8.88811	6.05912			8.71557	2.82138
	9.10366	7.39903			9.30712	7.1414
	8.80369	3.46574			9.28619	4.7397
	8.92276	3.46574			9.03869	5.5037
	8.95737	7.08473			8.80565	4.73268
	8.91529	3.49043			8.98002	6.54879
	8.58901	5.32593			9.20256	7.76166
	9.14739	5.92319			9.5646	8.1082
	8.82579	5.94856			8.34074	3.36038
	8.92392	5.40807			9.0113	7.46669
	9.01001	3.95124			8.83891	5.02388
	8.88845	6.27815			8.90213	3.64806
	8.9102	7.19983			8.66477	6.55108
	8.63986	5.85908			8.96429	7.03386
	8.86858	6.28711			8.74216	6.12074
	8.76931	4.97535			8.96864	3.74715
	8.9192	6.01518			8.92102	5.82659
	8.81922	6.4677			8.96326	5.51665
	8.69988	4.26549			9.03529	6.71998
	8.94224	5.46383			9.00978	6.88428
	8.7523	7.61125			9.19201	7.20102
	8.81481	4.28772			8.77066	5.13344
	9.35632	7.66819			8.91363	5.90154
	8.54501	7.50791			8.91729	6.75693
	8.91237	5.57595			9.2138	7.49554
	8.72215	5.24492			8.78376	8.32438
	9.42924	7.59327			8.8539	6.14161
	8.76603	4.4682			9.20225	6.75879
	8.7343	6.315			8.6524	5.40448
	9.31926	6.78446			9.49521	5.41521
	8.94475	4.61314			8.95497	6.84418
	9.02594	7.85523			8.91129	8.36152
	8.88922	5.17502			9.0712	8.17886
	9.00963	5.38998			9.02296	5.84296
	9.24345	5.25332			8.97179	3.3322
	8.75338	8.18178			9.11899	6.91652
	9.06276	6.72959			9.49945	5.62906
	9.34538	6.79347			8.96801	7.4524
	8.43767	3.91999			8.57553	5.53576
	8.90718	5.62618			8.7568	6.86276
	8.89323	5.80272			9.18542	6.94158
	8.70576	5.41165			9.07675	7.61244
	8.79368	5.57291			8.80108	5.67949
	8.61228	5.69843			8.96951	4.65966
	9.06427	4.77407			8.81894	5.04471
	8.82871	2.7213			8.72124	5.32593
	9.03219	6.33221			9.27364	8.38206
	8.69926	5.22789			9.07419	5.80754
	8.96286	7.17196			8.72124	6.62592
	8.9192	8.59888			8.9039	7.92183
	9.34954	7.43508			8.78878	7.66931
	8.51725	2.82138			9.09166	7.89477
	8.85903	6.38351			8.78005	5.82186
	9.29995	7.31162			8.4887	7.14267
	8.88159	5.02388			8.46456	7.29817
	9.43392	7.96499			8.97124	5.8499
	8.736	4.4682			8.68091	5.87493
	8.8137	8.14485			9.39936	5.7275
	8.55783	3.70868			8.80379	3.627
	8.42265	6.10122			7.75971	2.41591
	8.89374	7.19624			8.78129	5.17048
	7.8463	3.76584			8.90112	7.44775
	8.76989	4.52179			8.92623	5.55451
	8.99628	6.77262			8.96111	6.5545
	8.69916	4.44969			9.23029	5.86817
	8.73719	4.41159			9.21923	6.09221
	8.96048	6.08313			8.90844	7.58721
	8.60731	4.78749			9.35374	8.96434
	9.03986	4.85203			9.08028	7.73403
	9.156	6.25229			8.92367	6.34914
	9.18821	7.9195			9.05272	6.72671
	8.84206	5.76582			8.74473	4.68951
	8.62861	4.99721			9.38972	5.21494
	9.345	6.3808			8.79331	5.42935
	9.14296	6.76435			9.06563	7.17992
	8.76912	6.12074			8.92787	5.37898
	8.47496	7.78788			8.91179	5.21494
	8.69585	6.0535			9.32618	5.9548
	8.98477	6.78083			8.6919	3.99636
	8.69325	4.1957			8.75602	4.55598
	8.74423	5.39726			9.44804	7.51534
	9.11101	8.18713			9.12252	4.1957
	9.43372	7.85151			8.97979	6.37809
	8.57049	4.96981			8.86736	4.38203
	8.74196	6.79347			9.3101	6.27664
	9.11879	7.23792			9.0439	5.82186
	8.67043	4.06732			9.1213	5.33754
	9.09778	5.84528			8.96032	1.16315
	8.70329	5.60286			9.80928	6.08677
	8.83034	5.44674			8.51812	4.43082
	9.39504	5.588			8.71831	5.48064
	8.8577	4.57265			8.91538	7.13505
	9.19484	7.08003			8.90802	7.34627
	9.09235	4.80074			8.90802	8.60432
	8.67309	6.41934			8.97877	5.9548
	9.04368	6.72959			8.92127	5.03435
	9.00149	4.12066			8.78176	6.63752
	8.86035	4.76729			9.51653	5.92959
	8.81931	6.44635			9.27201	6.33221
	8.82752	8.128			8.94661	5.08016
	9.1339	5.31812			8.93932	7.83392
[truncated: 6,451 more rows]

## Sheet: FIg-4E
		Mean	Mean		Standard deviation	Standard deviation
	Strain	mtDNA copy number (relative to WT)	% Slow fraction		mtDNA copy number (relative to WT)	% Slow fraction
	atp10Δ	0.582454	21.5386		0.141797	4.17122
	atp23Δ	0.683153	22.4893		0.167993	3.15062
	cox9Δ	0.731527	10.9358		0.133575	1.11964
	csm3Δ	3.91738	6.19		0.592423	1.81019
	mdm38Δ	0.509489	25.1621		0.0719571	3.90568
	mip1Δ	0.000100685	NA		8.28601e-05	NA
	mrc1Δ	1.54697	6.61962		0.318387	1.92337
	pub1Δ	0.862543	17.441		0.17757	1.99963
	sml1Δ	1.34389	6.415		0.354168	0.205061
	tim11Δ	0.355457	52.8594		0.0946637	13.4548
	UCC8363	1.28943	4.69824		0.281205	2.67414

## Sheet: Fig-4F
			Mean	Std. Deviation
	Strain	Pre-growth condition	% Slow fraction	% Slow fraction
	WT	SCD	11.3133	1.8643
	WT	Ethanol	5.48333	2.86333
