# Supplementary material for: Single cell functional genomics reveals the importance of mitochondria in cell-to-cell phenotypic variation
Source: eLife journal article supplement (doi:10.7554/elife.38904), 2019-01-14

# Figure 5 - figure supplement 9

Slow < 0.24 h<sup>-1</sup> & Fast > 0.3 h<sup>-1</sup>

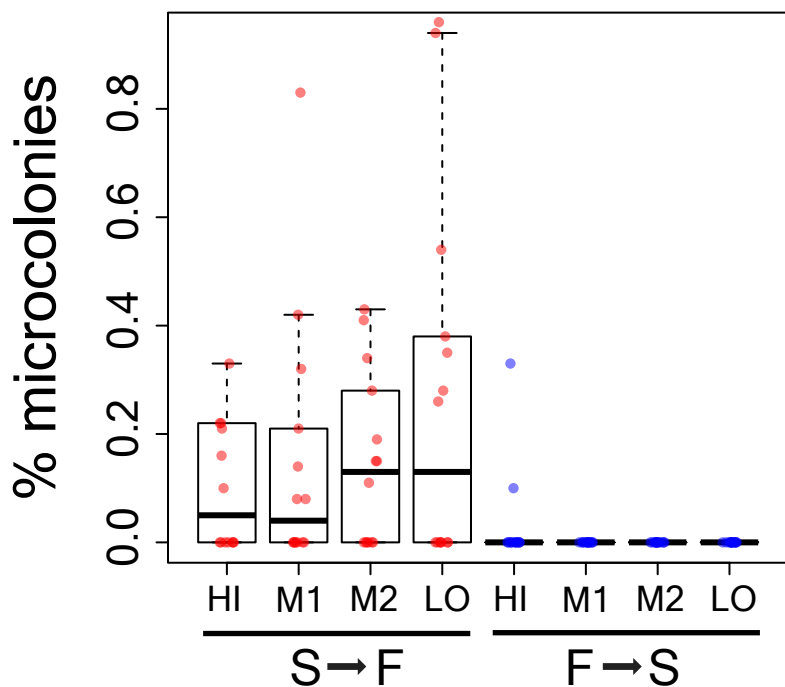

Slow < 0.26 h<sup>-1</sup> & Fast > 0.325 h<sup>-1</sup>

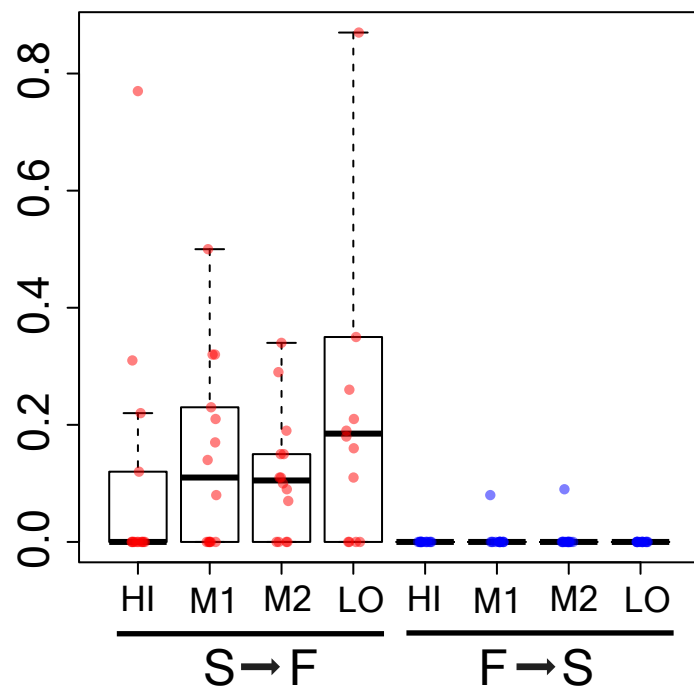

Slow < 0.28 h<sup>-1</sup> & Fast > 0.35 h<sup>-1</sup>

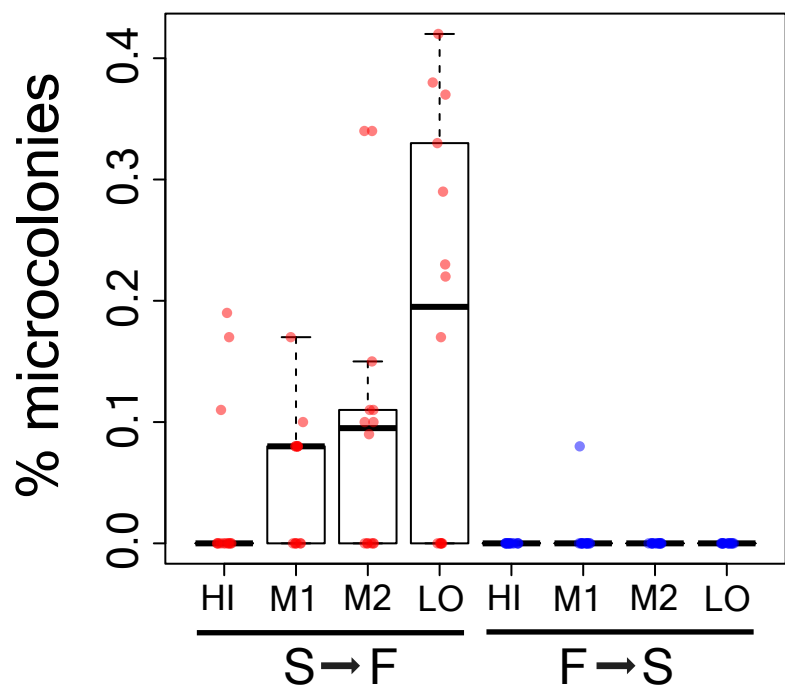

Slow < 0.30 h<sup>-1</sup> & Fast > 0.375 h<sup>-1</sup>

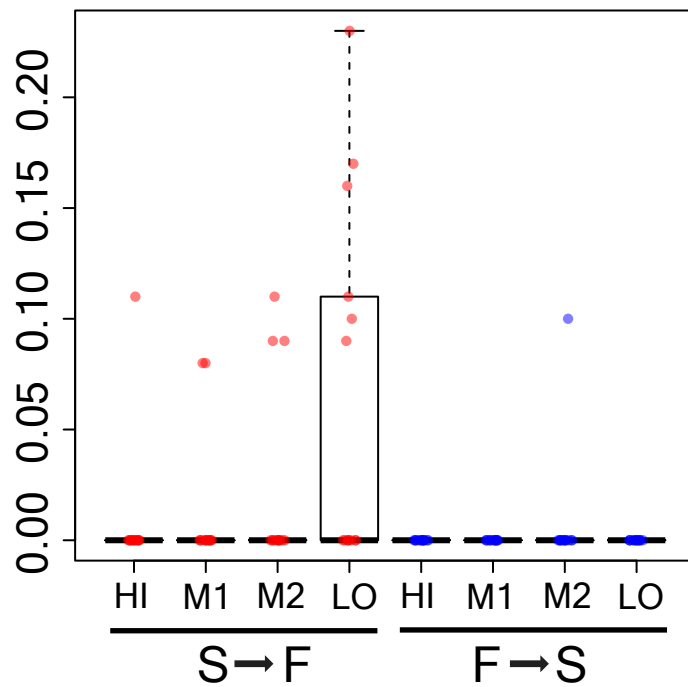

Supplement: supp [file elife-38904-supp-v1.zip › elife_poa_e38904_Figure_5_figure_supplement_9.pdf]
