# Supplementary material for: Single cell functional genomics reveals the importance of mitochondria in cell-to-cell phenotypic variation
Source: eLife journal article supplement (doi:10.7554/elife.38904), 2019-01-14
Supplement: supp [file elife-38904-supp-v1.zip › elife_poa_e38904_Figure_5_source_data_1.xlsx]

## Sheet: Fig-6A
	Expression of genes involved in cellular respiration
	(Fold change relative to bin T4 - log2 transformed)
	Gene	HI	M1	M2	LO
	COR1	-1.47352	-0.740401	-0.344045	0
	COX13	-1.54342	-0.629607	-0.303448	0
	COX4	-2.20476	-0.989414	-0.401951	0
	COX5A	-1.19978	-0.687824	-0.257014	0
	COX6	-1.74679	-0.684682	-0.310854	0
	HAP2	-0.86783	-0.301199	-0.112187	0
	KGD1	-1.28531	-0.572164	-0.30534	0
	MBR1	-2.83858	-0.717475	-0.207818	0
	MDH1	-1.09221	-0.694914	-0.307599	0
	NDI1	-1.52128	-0.489885	-0.188279	0
	PET20	-0.463025	-0.261916	-0.0790673	0
	QCR10	-2.04923	-0.782684	-0.305898	0
	QCR2	-1.43959	-0.606343	-0.302682	0
	QCR6	-1.7399	-0.75745	-0.287207	0
	QCR7	-1.62997	-0.606876	-0.305198	0
	QCR9	-1.51062	-0.672534	-0.283886	0
	RIP1	-2.29828	-0.760477	-0.339201	0
	SDH1	-2.46799	-0.851917	-0.336835	0
	SDH3	-1.28013	-0.479766	-0.229149	0
	ATP14	-0.966833	-0.723711	-0.293144	0
	ATP15	-0.708347	-0.373616	-0.324121	0
	ATP16	-1.02757	-0.526562	-0.279016	0
	ATP17	-1.58839	-0.675675	-0.287747	0
	ATP2	-1.087	-0.490702	-0.248232	0
	ATP20	-1.46997	-0.405966	-0.161484	0
	ATP4	-0.57477	-0.324415	-0.102376	0
	ATP5	-0.791132	-0.391379	-0.167965	0

## Sheet: Fig-6B
	Expression of DNA damage response and DNA repair genes
	(Fold change relative to bin T4 - log2 transformed)
	gene	HI	M1	M2	LO
	ABF1	0.742822	0.0593896	-0.0467435	0
	BRE1	0.671961	-0.120181	-0.109056	0
	CDC28	0.504063	0.0787016	0.103646	0
	CDC45	1.68489	0.679365	0.197257	0
	CDC9	1.45273	0.559142	0.208848	0
	CSM3	0.488808	0.131988	0.244043	0
	DIN7	1.64405	0.714386	0.34149	0
	DPB2	1.89111	0.701589	0.354449	0
	DUN1	2.33846	1.24826	0.522471	0
	HHF1	1.20437	1.1696	0.668917	0
	HUG1	2.15774	1.1704	0.578527	0
	MCD1	2.30319	1.21322	0.75661	0
	MRC1	1.02072	0.338702	0.133899	0
	MSH2	1.37383	0.545544	0.229517	0
	MSH3	0.684658	-0.0205498	-0.154406	0
	RAD23	0.937426	0.103914	0.0812002	0
	RAD27	1.17155	0.434045	0.208485	0
	RAD51	0.850786	0.176954	0.130214	0
	RAD52	0.928382	0.14158	0.159462	0
	RAD54	1.24617	0.226807	0.0802561	0
	RTT107	1.28951	1.03953	0.434038	0
	SMC5	0.457817	0.117426	0.0473875	0
	SMC6	0.683429	0.520572	0.316422	0
	TOF1	1.33698	0.461778	-0.0232473	0

## Sheet: Fig-6C
	Expression of genes associated with iron deficiency
	(Fold change relative to bin T4 - log2 transformed)
	Gene	HI	M1	M2	LO
	FIT1	-0.68205	-0.76707	-0.44054	0
	FIT2	4.0143	1.94649	1.0798	0
	FIT3	1.70545	0.712771	0.419225	0
	ARN1	1.88412	0.531851	0.309271	0
	TAF1	0.0248457	-0.120368	-0.0204641	0
	SIT1	2.46853	0.992564	0.564169	0
	ENB1	2.32706	0.376993	0.167939	0
	FET3	2.61914	0.787862	0.336195	0
	FTR1	3.03458	0.545418	0.224628	0
	ATX1	0.885552	0.511333	0.213962	0
	CCC2	0.458854	-0.231376	-0.0886098	0
	FRE1	1.69951	1.1201	0.510835	0
	FRE3	1.70695	0.182203	0.105399	0
	FRE6	0.464818	0.00241398	-0.0310494	0
	FET4	0.241796	-0.236238	-0.102173	0
	FET5	0.853583	0.0202901	0.0842167	0
	FTH1	0.479398	-0.0745421	0.0382246	0
	HMX1	3.36882	0.285794	0.119784	0
	TIS11	3.2677	0.427151	0.262533	0
	NFU1	-0.188523	-0.00579106	0.0206218	0
	ISA1	-1.53581	-0.217166	-0.109283	0
	LEU1	-1.00833	0.650379	0.279995	0
	SDH2	-2.30622	-0.670876	-0.238406	0
	LIP5	-1.01709	-0.224312	-0.0787107	0
	RIP1	-2.29828	-0.760477	-0.339201	0
	YAH1	1.02299	0.635644	0.37634	0
	RLI1	-0.202528	0.362712	0.103446	0
	BIO2	1.59988	0.622624	0.38242	0
	HEM15	-1.65886	-0.422768	-0.129327	0
	HEM13	0.622437	0.340711	0.275954	0
	CTT1	-3.1665	-0.771612	-0.234192	0
	SDH4	-1.58891	-0.458202	-0.188152	0

## Sheet: Fig-6E
		Fluconazole 50µg/ml					Fluconazole 60µg/ml
		Mean	Stdev				Mean	Stdev
	bin	% survival	% survival			bin	% survival	% survival
	HI	61.0233	21.9553			HI	51.78	20.179
	M1	8.82	4.30526			M1	9.885	5.54038
	M2	6.97	3.54814			M2	10.38	7.67366
	LO	6.67	1.4471			LO	9.695	6.34748

## Sheet: Fig-6F
			Average % survival
		MMP bin	% competent	% deficient		Stdev % overall urvival
	Rep1	High	17.1053	67.4477		8.65501
		Low	22.3449	5.16118		6.67768
	Rep2	High	3.02221	36.327		8.40233
		Low	20.0152	4.48702		4.58386
	Rep3	High	21.8881	110.689		11.9942
		Low	44.777	5.62619		15.768

## Sheet: Fig-6G
	Expression of PDR3 and PDR5
		Mean expression					Stdev
	gene	HI	M1	M2	LO		HI	M1	M2	LO
	PDR3	2148.5	1096.5	853	757.667		426.083	197.008	48.3391	14.5717
	PDR5	16993.8	3923.75	3192.5	3283		6629.15	883.956	548.535	599.651
