# Supplementary material for: Single cell functional genomics reveals the importance of mitochondria in cell-to-cell phenotypic variation
Source: eLife journal article supplement (doi:10.7554/elife.38904), 2019-01-14
Supplement: supp [file elife-38904-supp-v1.zip › elife_poa_e38904_Supplementary_File_1.xlsx]

## Sheet: Sheet1
Strain	MatType	Mean	Mode	SlowFrac	Source
273614N	a	0.349	0.37	9.15	Clinical
322134S	a	0.389	0.386	5.6	Clinical
BC187	a	0.429	0.428	1.88	Fermentation
DBVPG1106	a	0.406	0.419	11.19	Fermentation
DBVPG1373	a	0.338	0.348	2.25	Wild
DBVPG6044	a	0.399	0.423	17.87	Fermentation
DBVPG6765	a	0.418	0.437	8.22	Unknown
L_1374	a	0.412	0.42	9.61	Fermentation
L_1528	a	0.433	0.447	5.28	Fermentation
NCYC110	a	0.399	0.399	4.26	Fermentation
SK1	a	0.244	0.241	0	Lab
UWOPS03-461.4	a	0.411	0.435	19.3	Wild
UWOPS05-217.3	a	0.438	0.439	10.38	Wild
UWOPS05-227.2	a	0.395	0.433	26.83	Wild
UWOPS83-787.3	a	0.418	0.428	10.11	Wild
UWOPS87-2421	a	0.404	0.423	12.61	Wild
W303	a	0.368	0.381	5.06	Lab
Y12	a	0.421	0.46	21.25	Fermentation
Y55	a	0.422	0.435	10.12	Lab
YIIc17_E5	a	0.399	0.415	10.22	Fermentation
YJM975	a	0.406	0.429	9.46	Clinical
YJM978	a	0.379	0.367	5.59	Clinical
YJM981	a	0.37	0.379	3.28	Clinical
YPS128	a	0.448	0.466	8.45	Wild
YPS606	a	0.421	0.442	8.19	Wild
273614N	α	0.352	0.339	0.15	Clinical
378604X	α	0.429	0.441	5.97	Clinical
BC187	α	0.392	0.411	12.32	Fermentation
DBVPG1106	α	0.429	0.422	2.93	Fermentation
DBVPG1373	α	0.372	0.375	2.67	Wild
DBVPG6044	α	0.406	0.434	7.64	Fermentation
DBVPG6765	α	0.447	0.452	2.86	Unknown
L_1374	α	0.422	0.44	15.28	Fermentation
L_1528	α	0.407	0.41	0	Fermentation
NCYC110	α	0.406	0.426	15.36	Fermentation
S288c	α	0.366	0.369	6.56	Lab
SK1	α	0.251	0.247	0	Lab
UWOPS03-461.4	α	0.42	0.452	16.05	Wild
UWOPS05-217.3	α	0.388	0.434	33.33	Wild
UWOPS05-227.2	α	0.421	0.442	16.92	Wild
UWOPS83-787.3	α	0.429	0.426	7.41	Wild
UWOPS87-2421	α	0.378	0.385	4.49	Wild
Y12	α	0.429	0.465	22.72	Fermentation
Y55	α	0.405	0.43	15.46	Lab
YIIc17_E5	α	0.361	0.376	7.33	Fermentation
YJM975	α	0.439	0.454	11.97	Clinical
YJM978	α	0.379	0.386	5.77	Clinical
YJM981	α	0.381	0.376	0	Clinical
YPS128	α	0.422	0.444	11.91	Wild
YPS606	α	0.438	0.482	26.19	Wild
273614N	D	0.393	0.405	1.84	Clinical
BC187	D	0.433	0.457	8.22	Fermentation
DBVPG1106	D	0.465	0.456	0.44	Fermentation
DBVPG1373	D	0.425	0.467	4.8	Wild
DBVPG1788	D	0.435	0.45	6.14	Wild
DBVPG1853	D	0.4	0.392	3.32	Fermentation
DBVPG6044	D	0.432	0.447	9.81	Fermentation
DBVPG6765	D	0.46	0.468	0	Unknown
L_1374	D	0.409	0.428	7.43	Fermentation
L_1528	D	0.431	0.446	3.65	Fermentation
NCYC110	D	0.465	0.459	4.27	Fermentation
SK1	D	0.422	0.436	10.88	Lab
UWOPS03-461.4	D	0.449	0.461	6.67	Wild
UWOPS05-217.3	D	0.433	0.461	8.04	Wild
UWOPS05-227.2	D	0.445	0.451	6.62	Wild
UWOPS83-787.3	D	0.417	0.423	10.33	Wild
UWOPS87-2421	D	0.391	0.421	11.67	Wild
Y12	D	0.478	0.478	0	Fermentation
Y55	D	0.401	0.411	4.61	Lab
YIIc17_E5	D	0.381	0.399	9.2	Fermentation
YJM975	D	0.462	0.479	7.58	Clinical
YJM978	D	0.415	0.407	4.96	Clinical
YJM981	D	0.408	0.405	0.31	Clinical
YPS128	D	0.471	0.474	3.85	Wild
YPS606	D	0.421	0.445	15.47	Wild
