# Supplementary material for: Single cell functional genomics reveals the importance of mitochondria in cell-to-cell phenotypic variation
Source: eLife journal article supplement (doi:10.7554/elife.38904), 2019-01-14
Supplement: supp [file elife-38904-supp-v1.zip › elife_poa_e38904_Supplementary_File_2.xlsx]

## Sheet: All_data
GENE_deleted	Color	MEAN	SD	NOISE (CV)	MEDIAN	MODE	SLOWFRAC	FASTFRAC	# Reproducible replicates
YLR366W	orange	0.382	0.06	0.158	0.39	0.393	6.8	0	3
HOG1	orange	0.361	0.054	0.151	0.366	0.371	4.79	0	3
RSM18	orange	0.369	0.057	0.156	0.373	0.374	5.19	0	3
SEE1	orange	0.38	0.063	0.167	0.387	0.391	7.26	0	3
TIF4631	orange	0.37	0.06	0.162	0.376	0.381	6.48	0	3
MRPL3	orange	0.347	0.047	0.136	0.348	0.348	1.71	0.41	2
QRI7	orange	0.342	0.044	0.129	0.346	0.352	2.75	0	3
YJR084W	orange	0.378	0.059	0.157	0.385	0.392	7	0	3
RAD27	orange	0.375	0.052	0.141	0.381	0.381	5.58	0	2
BSC1	orange	0.38	0.063	0.166	0.389	0.39	7	0	3
GSH2	orange	0.37	0.06	0.161	0.376	0.381	6.7	0	3
DUF1	orange	0.367	0.057	0.156	0.371	0.368	4.97	0	3
HKR1	orange	0.379	0.055	0.144	0.388	0.389	7.48	0	3
SLX5	orange	0.373	0.055	0.149	0.378	0.381	6.43	0	3
RPS14A	orange	0.366	0.05	0.138	0.37	0.369	4.41	0	3
COQ9	orange	0.37	0.052	0.141	0.376	0.378	6.37	0	3
NOP13	orange	0.386	0.053	0.136	0.394	0.391	6.5	0	2
ATG20	orange	0.382	0.066	0.173	0.386	0.388	5.97	0	2
HRD3	orange	0.389	0.062	0.159	0.398	0.397	8.1	0	3
YNL067W-B	orange	0.386	0.063	0.162	0.393	0.396	7.93	0	3
MRH4	orange	0.362	0.052	0.142	0.365	0.363	2.45	0	2
MSE1	orange	0.353	0.06	0.17	0.357	0.36	3.95	0	3
RPH1	orange	0.373	0.058	0.155	0.373	0.364	1.77	0.84	2
SYP1	orange	0.385	0.059	0.153	0.393	0.395	6.72	0	2
HAP3	orange	0.334	0.043	0.128	0.336	0.337	1.87	0	3
YBR292C	orange	0.371	0.07	0.19	0.376	0.378	4.36	0.26	3
PDR8	orange	0.377	0.058	0.153	0.385	0.393	7.6	0	3
FAR11	orange	0.375	0.046	0.123	0.378	0.377	5.2	0	3
YAF9	orange	0.376	0.068	0.182	0.385	0.385	6.21	0	3
RPS30B	orange	0.376	0.053	0.141	0.383	0.382	6.51	0	3
OPI7	orange	0.383	0.063	0.165	0.387	0.385	5.14	0	2
DEG1	orange	0.323	0.052	0.163	0.325	0.326	0.35	0	2
MRPL6	orange	0.358	0.052	0.144	0.36	0.357	3.32	0	3
RRG8	orange	0.361	0.055	0.153	0.366	0.368	4.15	0	3
RPS26B	orange	0.386	0.067	0.174	0.389	0.389	2.73	0.12	2
MST1	orange	0.363	0.053	0.146	0.367	0.375	3.29	0	2
MBF1	orange	0.383	0.065	0.17	0.392	0.395	7.16	0	3
DBF2	orange	0.379	0.046	0.122	0.386	0.391	6.49	0	3
MRPL8	orange	0.364	0.05	0.137	0.367	0.365	1.34	0	2
YKL053W	orange	0.378	0.055	0.146	0.387	0.39	7.06	0	3
MSS116	orange	0.359	0.05	0.139	0.363	0.364	4.08	0	3
YGL042C	orange	0.39	0.073	0.189	0.396	0.393	4.43	0	2
LDB7	orange	0.391	0.053	0.137	0.396	0.395	3.86	0	2
DEF1	orange	0.365	0.042	0.114	0.366	0.366	0.58	0	2
ATG13	orange	0.371	0.063	0.171	0.377	0.377	4.94	0	3
LST7	orange	0.279	0.05	0.178	0.279	0.275	0.63	0.28	3
MRPS28	orange	0.365	0.054	0.149	0.369	0.372	4.83	0	3
NST1	orange	0.38	0.056	0.147	0.387	0.395	6.87	0	3
PPH3	orange	0.377	0.048	0.128	0.384	0.385	6.27	0	3
ENT4	orange	0.364	0.057	0.156	0.368	0.364	3.37	0	3
MRP1	orange	0.357	0.058	0.161	0.359	0.355	2.25	1.14	3
YTA12	orange	0.335	0.05	0.15	0.337	0.339	1.33	0	3
RPL17B	orange	0.369	0.05	0.135	0.374	0.382	6.15	0	3
ARP8	orange	0.347	0.065	0.186	0.35	0.355	2.45	0	3
RMD9	orange	0.372	0.053	0.142	0.374	0.369	2.21	0.16	3
RAD2	orange	0.388	0.057	0.148	0.396	0.401	6.38	0	3
SWC3	orange	0.38	0.062	0.165	0.388	0.388	6.08	0	3
RPL20A	orange	0.299	0.051	0.169	0.3	0.301	0.69	0	3
MIP1	orange	0.378	0.062	0.164	0.383	0.382	4.43	0	3
VAC17	orange	0.387	0.064	0.165	0.394	0.395	5.97	0	3
HFA1	orange	0.376	0.057	0.15	0.379	0.375	3.35	0	3
RSM25	orange	0.384	0.048	0.125	0.387	0.384	4.22	0	3
PIM1	orange	0.346	0.05	0.145	0.349	0.356	1.55	0	3
YDL094C	orange	0.38	0.06	0.159	0.385	0.383	4.41	0	3
APT2	orange	0.391	0.066	0.169	0.398	0.395	4.47	0	3
YAR1	orange	0.371	0.062	0.168	0.374	0.373	3.17	0	3
YMR193C-A	orange	0.367	0.053	0.145	0.37	0.371	2.21	0.21	3
BFR1	orange	0.39	0.051	0.132	0.394	0.395	4.71	0	3
SIR1	orange	0.388	0.058	0.149	0.392	0.392	3.21	0.2	3
UFO1	orange	0.354	0.051	0.143	0.356	0.355	0.94	0.18	3
MTF2	orange	0.378	0.049	0.13	0.381	0.376	2.57	0	3
IRC19	orange	0.38	0.055	0.145	0.383	0.376	2.9	0	3
EST3	orange	0.378	0.058	0.154	0.383	0.387	4.48	0	3
MSK1	orange	0.362	0.058	0.16	0.364	0.368	1.39	0.31	3
HHF1	orange	0.379	0.054	0.142	0.384	0.392	5.56	0	3
TIR3	orange	0.383	0.046	0.12	0.383	0.381	1.36	0.78	3
ATP22	orange	0.386	0.053	0.137	0.387	0.386	1.45	1	3
MUB1	orange	0.391	0.053	0.136	0.395	0.397	4.15	0	3
YJL215C	lightblue	0.381	0.059	0.156	0.389	0.394	10.57	0	3
CUE1	lightblue	0.379	0.057	0.151	0.389	0.391	10.08	0	3
KIP2	lightblue	0.378	0.057	0.152	0.388	0.386	9.86	0	3
LAG2	lightblue	0.376	0.057	0.153	0.386	0.389	10.11	0	3
VIP1	lightblue	0.297	0.053	0.178	0.304	0.312	10.51	0	2
SCO1	lightblue	0.32	0.073	0.23	0.327	0.333	13.65	0.46	2
CKB2	lightblue	0.308	0.069	0.222	0.313	0.322	7.38	1.28	2
CSG2	lightblue	0.377	0.06	0.16	0.385	0.394	10.43	0	3
YGR237C	lightblue	0.338	0.057	0.168	0.342	0.344	5.84	0	3
SNC2	lightblue	0.353	0.06	0.169	0.362	0.368	8.15	0	3
RPS0A	lightblue	0.343	0.062	0.179	0.35	0.357	6.9	0	3
PGC1	lightblue	0.373	0.054	0.145	0.382	0.379	8.85	0	3
POL32	lightblue	0.361	0.054	0.151	0.369	0.369	8.58	0	3
GAL11	lightblue	0.355	0.062	0.175	0.362	0.366	8.06	0	2
LSM7	lightblue	0.363	0.061	0.168	0.371	0.378	9.36	0	2
SLM5	lightblue	0.297	0.062	0.209	0.3	0.304	3.29	0	3
SAP30	lightblue	0.349	0.06	0.171	0.354	0.354	5.7	0	3
RPS18A	lightblue	0.318	0.047	0.148	0.323	0.331	4.38	0	3
YKU80	lightblue	0.371	0.055	0.148	0.379	0.378	9.61	0	3
ERS1	lightblue	0.38	0.064	0.168	0.393	0.398	10.49	0	3
GPP2	lightblue	0.374	0.059	0.158	0.384	0.389	9.97	0	3
MRPL32	lightblue	0.342	0.057	0.167	0.348	0.351	5.93	0	3
TFA2	lightblue	0.356	0.061	0.172	0.363	0.366	7.77	0	3
SGF73	lightblue	0.356	0.056	0.158	0.36	0.359	6.99	0	2
SPO22	lightblue	0.354	0.056	0.16	0.363	0.369	8.27	0	2
NIP100	lightblue	0.362	0.055	0.151	0.37	0.378	9	0	3
LAT1	lightblue	0.359	0.059	0.163	0.369	0.374	8.79	0	3
SYO1	lightblue	0.336	0.056	0.168	0.339	0.343	5.17	0	3
LHS1	lightblue	0.366	0.059	0.162	0.374	0.38	9.07	0	3
SNL1	lightblue	0.38	0.067	0.175	0.393	0.394	10.43	0	3
RPS1A	lightblue	0.344	0.048	0.138	0.347	0.342	5.19	0	2
NAS2	lightblue	0.361	0.06	0.166	0.37	0.371	8.51	0	3
TDA10	lightblue	0.375	0.059	0.158	0.386	0.39	10.1	0	3
OCA5	lightblue	0.378	0.063	0.168	0.386	0.39	8.75	0	3
BDH1	lightblue	0.378	0.066	0.175	0.391	0.391	10.43	0	3
GPM2	lightblue	0.294	0.043	0.148	0.296	0.298	2.79	0	2
ACO2	lightblue	0.374	0.07	0.186	0.384	0.394	10.73	0	2
SNF5	lightblue	0.207	0.062	0.303	0.21	0.216	2.81	0	2
RPL40A	lightblue	0.357	0.052	0.145	0.362	0.361	7.36	0	3
POT1	lightblue	0.389	0.061	0.158	0.4	0.4	10.8	0	3
YIL028W	lightblue	0.362	0.061	0.168	0.371	0.371	8.78	0	3
DAL81	lightblue	0.363	0.064	0.175	0.372	0.379	8.55	0	3
YMR031W-A	lightblue	0.345	0.06	0.174	0.354	0.361	8.13	0	3
UBP2	lightblue	0.38	0.066	0.173	0.393	0.4	10.85	0	3
RPL4A	lightblue	0.362	0.06	0.166	0.371	0.376	9.11	0	3
MGM1	lightblue	0.331	0.054	0.162	0.336	0.344	5.14	0	2
DBP3	lightblue	0.346	0.049	0.14	0.351	0.351	6.32	0	2
CIS3	lightblue	0.382	0.063	0.165	0.393	0.395	10.84	0	3
MRPL33	lightblue	0.354	0.058	0.163	0.36	0.366	8.27	0	3
DIA4	lightblue	0.359	0.055	0.154	0.365	0.369	8.06	0	3
HMO1	lightblue	0.257	0.047	0.183	0.257	0.258	1.53	1.06	3
RAD14	lightblue	0.373	0.061	0.163	0.383	0.387	10.17	0	3
VPS29	lightblue	0.182	0.058	0.316	0.181	0.187	0.74	5.21	3
YIL029C	lightblue	0.351	0.058	0.164	0.359	0.369	8.36	0	3
MRPS12	lightblue	0.337	0.061	0.182	0.342	0.349	6.38	0	2
OST3	lightblue	0.362	0.064	0.176	0.371	0.381	8.02	0	2
GET2	lightblue	0.356	0.055	0.155	0.363	0.367	6.9	0	2
SIP18	lightblue	0.366	0.054	0.149	0.374	0.377	9.35	0	3
ORT1	lightblue	0.375	0.063	0.167	0.386	0.389	10.28	0	3
YPL113C	lightblue	0.379	0.059	0.157	0.39	0.388	10.22	0	3
FPR1	lightblue	0.375	0.057	0.151	0.381	0.381	8.85	0	3
TCO89	lightblue	0.371	0.058	0.157	0.378	0.384	9.44	0	3
CKB1	lightblue	0.356	0.057	0.16	0.367	0.373	8.46	0	2
RPS8A	lightblue	0.262	0.056	0.213	0.262	0.256	1.35	0.11	3
HDA3	lightblue	0.343	0.052	0.151	0.35	0.358	6.67	0	2
SSN8	lightblue	0.293	0.045	0.155	0.295	0.292	2.66	0	2
HOS4	lightblue	0.344	0.053	0.156	0.348	0.348	5.78	0	2
SRO7	lightblue	0.368	0.057	0.156	0.377	0.379	9.47	0	3
YFR032C-B	lightblue	0.365	0.054	0.148	0.374	0.379	9.02	0	3
UBA3	lightblue	0.367	0.064	0.174	0.379	0.387	10.61	0	3
CTF8	lightblue	0.362	0.06	0.166	0.371	0.382	9.12	0	2
MSR1	lightblue	0.359	0.06	0.167	0.363	0.36	8.08	0	3
TSL1	lightblue	0.371	0.061	0.164	0.381	0.383	9.88	0	3
IRC21	lightblue	0.365	0.053	0.145	0.373	0.375	8.7	0	3
YHR045W	lightblue	0.382	0.06	0.158	0.393	0.394	10.77	0	3
YJL135W	lightblue	0.386	0.064	0.167	0.397	0.399	10.73	0	3
SMP1	lightblue	0.378	0.057	0.151	0.388	0.391	10.32	0	3
CUS2	lightblue	0.382	0.055	0.144	0.391	0.395	10.52	0	3
YBR196C-A	lightblue	0.338	0.046	0.135	0.343	0.344	5.17	0	3
OLA1	lightblue	0.371	0.064	0.171	0.382	0.383	10.05	0	2
MRPL37	lightblue	0.357	0.058	0.163	0.363	0.367	8.99	0	2
AIM44	lightblue	0.37	0.058	0.157	0.381	0.386	9.55	0	3
OAR1	lightblue	0.375	0.053	0.141	0.382	0.379	9.57	0	3
AIM4	lightblue	0.328	0.056	0.17	0.331	0.337	4.1	0	2
BDF1	lightblue	0.351	0.057	0.163	0.359	0.36	7.11	0	3
YJL120W	lightblue	0.366	0.059	0.162	0.38	0.386	9.52	0	2
YGR064W	lightblue	0.341	0.059	0.175	0.349	0.357	6.17	0	2
SRN2	lightblue	0.374	0.061	0.162	0.386	0.394	11.4	0	3
TMA20	lightblue	0.363	0.064	0.177	0.373	0.377	9.36	0	3
MSY1	lightblue	0.293	0.053	0.18	0.295	0.298	2.96	0.21	3
AFT2	lightblue	0.377	0.06	0.16	0.388	0.391	10.43	0	3
ADH1	lightblue	0.356	0.065	0.183	0.364	0.364	8.04	0	2
TSA1	lightblue	0.363	0.061	0.167	0.37	0.374	8.31	0	3
FMP48	lightblue	0.385	0.06	0.156	0.395	0.4	11.75	0	3
HIM1	lightblue	0.379	0.063	0.167	0.392	0.398	11.19	0	3
YDR115W	lightblue	0.296	0.056	0.19	0.296	0.292	2.21	1.7	3
LYS12	lightblue	0.378	0.065	0.173	0.388	0.392	9.35	0	3
REC104	lightblue	0.357	0.063	0.178	0.366	0.372	8.98	0	3
RPL13A	lightblue	0.327	0.044	0.133	0.331	0.332	5.01	0	3
CTR1	lightblue	0.333	0.052	0.157	0.337	0.341	5.52	0	3
YJL218W	lightblue	0.383	0.061	0.159	0.394	0.394	10.96	0	3
YGL188C-A	lightblue	0.308	0.052	0.171	0.31	0.301	2.56	0	2
RSM23	lightblue	0.358	0.063	0.175	0.366	0.372	8.79	0	2
GCN20	lightblue	0.366	0.069	0.189	0.376	0.379	11.29	0	2
GTR2	lightblue	0.369	0.063	0.17	0.377	0.388	9	0	3
STB5	lightblue	0.288	0.063	0.217	0.29	0.289	3.31	0	3
PEX5	lightblue	0.355	0.05	0.141	0.361	0.362	7.11	0	3
CYC2	lightblue	0.366	0.063	0.171	0.374	0.378	10.61	0	3
BUL1	lightblue	0.362	0.054	0.149	0.37	0.372	9.02	0	3
RTT106	lightblue	0.348	0.05	0.144	0.353	0.354	6.61	0	3
HTA1	lightblue	0.348	0.051	0.146	0.353	0.351	5.41	0	3
NUP170	lightblue	0.371	0.072	0.193	0.384	0.387	11.17	0	3
TMC1	lightblue	0.379	0.059	0.156	0.39	0.395	11.44	0	3
MRS3	lightblue	0.371	0.056	0.152	0.38	0.382	9.84	0	3
RED1	lightblue	0.387	0.061	0.157	0.397	0.399	11.26	0	3
MDM10	lightblue	0.221	0.066	0.297	0.223	0.226	3.88	1.66	2
YGR125W	lightblue	0.367	0.06	0.165	0.378	0.381	9.58	0	3
MRP20	lightblue	0.356	0.057	0.159	0.361	0.364	6.92	0	2
BPH1	lightblue	0.376	0.069	0.184	0.388	0.393	9.66	0	2
SSK2	lightblue	0.37	0.059	0.16	0.38	0.383	10.5	0	3
DFM1	lightblue	0.381	0.055	0.144	0.391	0.39	9.96	0	3
DBP7	lightblue	0.277	0.037	0.135	0.279	0.277	1.79	0.34	3
RSM27	lightblue	0.33	0.059	0.18	0.335	0.339	7.02	0	3
ARG2	lightblue	0.372	0.057	0.152	0.379	0.386	8.67	0	3
MRPL1	lightblue	0.355	0.055	0.155	0.362	0.364	7.37	0	3
RPS21A	lightblue	0.328	0.044	0.135	0.332	0.337	4.52	0	3
VPS8	lightblue	0.364	0.054	0.15	0.371	0.374	8.18	0	2
VPS63	lightblue	0.348	0.05	0.142	0.353	0.353	5.78	0	2
PEX10	lightblue	0.37	0.065	0.176	0.38	0.385	10.81	0	2
NRP1	lightblue	0.337	0.053	0.158	0.342	0.342	5.55	0	3
ATP7	lightblue	0.236	0.063	0.265	0.236	0.23	0.07	1.39	3
EAF6	lightblue	0.378	0.072	0.191	0.39	0.394	10.13	0	3
VTS1	lightblue	0.355	0.049	0.137	0.362	0.369	8.73	0	3
VAC8	lightblue	0.359	0.063	0.174	0.372	0.378	9.66	0	3
KCH1	lightblue	0.37	0.066	0.178	0.382	0.385	9.38	0	2
TIF4632	lightblue	0.355	0.061	0.173	0.363	0.368	8.63	0	3
SNF8	lightblue	0.373	0.068	0.182	0.384	0.388	10.72	0	3
PMS1	lightblue	0.375	0.062	0.166	0.384	0.388	9.72	0	3
FRE6	lightblue	0.372	0.059	0.158	0.38	0.385	8.82	0	3
OPI1	lightblue	0.353	0.068	0.193	0.359	0.36	6.45	0	3
YPR117W	lightblue	0.365	0.058	0.159	0.375	0.381	9.93	0	3
SLK19	lightblue	0.37	0.057	0.154	0.381	0.387	9.73	0	2
EDE1	lightblue	0.361	0.057	0.156	0.368	0.375	5.76	0.41	2
NVJ2	lightblue	0.376	0.06	0.159	0.386	0.388	9.66	0	3
CYS4	lightblue	0.138	0.045	0.331	0.133	0.128	0	7.26	2
STP22	lightblue	0.359	0.075	0.211	0.374	0.378	12.23	0	2
RPA34	lightblue	0.359	0.058	0.161	0.367	0.368	8.41	0	3
RPS22A	lightblue	0.376	0.056	0.149	0.387	0.392	10.96	0	3
PSY1	lightblue	0.36	0.057	0.16	0.368	0.37	7.81	0	3
UBX2	lightblue	0.369	0.064	0.175	0.375	0.377	8.7	0	3
MTG1	lightblue	0.294	0.053	0.18	0.295	0.299	3.01	0.05	3
PSR2	lightblue	0.373	0.064	0.172	0.387	0.394	11.55	0	3
RGS2	lightblue	0.389	0.061	0.157	0.399	0.399	10.49	0	3
RIM15	lightblue	0.373	0.054	0.145	0.383	0.388	10.54	0	2
EST2	lightblue	0.35	0.061	0.174	0.357	0.363	7.12	0	3
AGE2	lightblue	0.367	0.066	0.18	0.373	0.37	7.42	0	2
VPS16	lightblue	0.201	0.067	0.334	0.198	0.202	0	3.13	2
PEP1	lightblue	0.355	0.063	0.177	0.363	0.372	7.68	0	3
EFT2	lightblue	0.337	0.051	0.151	0.343	0.346	5.97	0	3
YGR219W	lightblue	0.331	0.053	0.159	0.334	0.34	4.57	0	3
PET112	lightblue	0.348	0.058	0.168	0.356	0.358	8.74	0	3
MRPL36	lightblue	0.313	0.05	0.161	0.315	0.321	3.11	0	3
TRI1	lightblue	0.379	0.061	0.161	0.391	0.396	11.19	0	3
YIL032C	lightblue	0.375	0.058	0.154	0.385	0.387	10.62	0	3
YDL012C	lightblue	0.374	0.067	0.178	0.387	0.39	11.98	0	2
PCA1	lightblue	0.377	0.055	0.147	0.386	0.388	9.39	0	2
YNL115C	lightblue	0.38	0.07	0.184	0.394	0.395	11.93	0	3
YDR445C	lightblue	0.379	0.066	0.174	0.392	0.394	11.29	0	3
2017-10-01	lightblue	0.347	0.057	0.165	0.353	0.363	7.58	0	3
MMM1	lightblue	0.341	0.052	0.151	0.346	0.351	5.44	0	3
RPL2B	lightblue	0.364	0.057	0.158	0.372	0.376	8.51	0	2
SPT2	lightblue	0.374	0.066	0.176	0.384	0.392	7.8	0	2
SKI3	lightblue	0.358	0.054	0.15	0.365	0.368	9.06	0	2
BUD28	lightblue	0.27	0.036	0.132	0.272	0.272	2.04	0	2
MRPL38	lightblue	0.327	0.048	0.147	0.33	0.331	3.62	0	3
BEM1	lightblue	0.321	0.068	0.212	0.327	0.333	4.85	0	3
REV3	lightblue	0.378	0.06	0.158	0.388	0.391	10.7	0	3
YDL180W	lightblue	0.376	0.054	0.145	0.386	0.394	9.94	0	2
CYC3	lightblue	0.357	0.066	0.184	0.367	0.371	8.98	0	2
NOP6	lightblue	0.358	0.058	0.161	0.367	0.372	9.11	0	3
YPT10	lightblue	0.376	0.057	0.151	0.386	0.389	9.41	0	3
HIT1	lightblue	0.349	0.052	0.149	0.354	0.361	5.29	0	2
PFA4	lightblue	0.377	0.063	0.167	0.39	0.393	11.43	0	2
THR4	lightblue	0.364	0.057	0.158	0.373	0.376	8	0	3
PFK1	lightblue	0.353	0.053	0.149	0.36	0.369	9.07	0	3
PRM2	lightblue	0.369	0.059	0.16	0.381	0.389	11.31	0	3
ARL1	lightblue	0.357	0.063	0.179	0.363	0.368	8.21	0	3
PRX1	lightblue	0.377	0.064	0.169	0.389	0.395	9.8	0	3
GLC8	lightblue	0.354	0.063	0.179	0.362	0.365	8.25	0	3
PEX3	lightblue	0.316	0.05	0.157	0.32	0.322	4.79	0.1	3
BRO1	lightblue	0.363	0.067	0.183	0.377	0.381	11.07	0	2
MRPS35	lightblue	0.361	0.06	0.166	0.366	0.363	6.38	0	2
SUV3	lightblue	0.354	0.056	0.157	0.36	0.357	7.39	0	3
ARX1	lightblue	0.333	0.052	0.157	0.338	0.345	6.21	0	3
RPS0B	lightblue	0.281	0.046	0.164	0.282	0.279	3.23	0.11	3
YML020W	lightblue	0.378	0.058	0.154	0.388	0.39	9.19	0	3
BTS1	lightblue	0.334	0.057	0.17	0.341	0.344	6.31	0	3
YOL035C	lightblue	0.379	0.063	0.167	0.388	0.389	11.45	0	3
YLR202C	lightblue	0.37	0.074	0.201	0.38	0.381	8.61	0	3
RSM24	lightblue	0.352	0.053	0.152	0.356	0.36	5.91	0	3
MDM36	lightblue	0.373	0.058	0.156	0.383	0.384	10.47	0	3
CRR1	lightblue	0.375	0.057	0.153	0.384	0.385	8.94	0	3
BRR1	lightblue	0.352	0.041	0.117	0.357	0.362	6.66	0	3
RPS10B	lightblue	0.332	0.044	0.132	0.336	0.335	5.33	0	3
ICY1	lightblue	0.381	0.06	0.157	0.391	0.393	9.87	0	3
HBS1	lightblue	0.351	0.046	0.131	0.356	0.358	6.03	0	3
ADH3	lightblue	0.304	0.06	0.197	0.307	0.313	4.57	0	3
YMR226C	lightblue	0.383	0.058	0.151	0.393	0.395	9.94	0	3
YNL120C	lightblue	0.349	0.051	0.144	0.354	0.355	5.41	0	2
IES6	lightblue	0.336	0.058	0.172	0.336	0.331	2.75	0.94	2
ASC1	lightblue	0.368	0.063	0.171	0.379	0.387	11.67	0	3
VMA21	lightblue	0.357	0.048	0.134	0.362	0.367	6.94	0	3
ATP18	lightblue	0.362	0.06	0.165	0.372	0.373	9.61	0	3
RPL26B	lightblue	0.375	0.059	0.157	0.384	0.385	8.65	0	3
RAD57	lightblue	0.367	0.061	0.166	0.375	0.38	10.38	0	3
SKO1	lightblue	0.381	0.062	0.162	0.394	0.4	12.63	0	3
ALG12	lightblue	0.369	0.062	0.169	0.38	0.388	11.48	0	3
YOR029W	lightblue	0.384	0.059	0.155	0.394	0.397	9.98	0	3
LIP2	lightblue	0.367	0.053	0.144	0.375	0.383	8.82	0	3
FES1	lightblue	0.34	0.051	0.151	0.345	0.343	3.71	0	2
MRPL4	lightblue	0.355	0.064	0.179	0.362	0.364	6.29	0	2
GIS1	lightblue	0.381	0.055	0.145	0.389	0.389	9.34	0	2
ATS1	lightblue	0.364	0.071	0.195	0.374	0.378	10.31	0	3
LIA1	lightblue	0.368	0.066	0.179	0.378	0.386	10.73	0	3
PAM17	lightblue	0.378	0.07	0.186	0.39	0.395	11.41	0	3
SNF4	lightblue	0.372	0.059	0.159	0.382	0.387	11.06	0	3
MRPL23	lightblue	0.316	0.044	0.141	0.318	0.311	2.5	0	2
ECM8	lightblue	0.374	0.063	0.168	0.387	0.392	11.33	0	3
LST4	lightblue	0.38	0.06	0.159	0.389	0.39	9.36	0	2
FYV1	lightblue	0.366	0.053	0.145	0.375	0.378	10.08	0	3
RRG1	lightblue	0.327	0.052	0.161	0.327	0.315	2.15	0.06	2
VMA2	lightblue	0.349	0.061	0.175	0.359	0.365	9	0	3
SKG3	lightblue	0.38	0.063	0.167	0.392	0.395	11.61	0	3
YIL161W	lightblue	0.382	0.066	0.172	0.395	0.397	11.79	0	3
UBC4	lightblue	0.35	0.054	0.154	0.357	0.358	7.68	0	3
ARO1	lightblue	0.377	0.059	0.158	0.387	0.39	9.24	0	2
RPO41	lightblue	0.324	0.051	0.157	0.326	0.323	2.82	0.37	3
YLL007C	lightblue	0.378	0.063	0.167	0.387	0.392	9.77	0	3
INP2	lightblue	0.376	0.067	0.179	0.384	0.388	7.72	0	3
YER034W	lightblue	0.376	0.059	0.158	0.387	0.391	11.08	0	3
YPL247C	lightblue	0.38	0.061	0.16	0.392	0.397	9.94	0	3
RUP1	lightblue	0.376	0.061	0.161	0.387	0.393	11.33	0	3
SRP40	lightblue	0.369	0.058	0.157	0.377	0.385	9.1	0	2
ADK1	lightblue	0.331	0.054	0.165	0.336	0.345	8.82	0	2
IRC14	lightblue	0.271	0.044	0.162	0.274	0.277	3.26	0	2
HOM3	lightblue	0.376	0.066	0.175	0.385	0.388	8.26	0	3
SFP1	lightblue	0.203	0.055	0.273	0.2	0.195	0.52	3.37	3
APL2	lightblue	0.381	0.067	0.175	0.391	0.396	9.86	0	3
SWC5	lightblue	0.373	0.063	0.169	0.383	0.385	8.78	0	3
COQ1	lightblue	0.353	0.073	0.207	0.367	0.373	10.63	0	3
PIH1	lightblue	0.305	0.043	0.142	0.305	0.301	2.51	0	3
SER2	lightblue	0.132	0.039	0.294	0.128	0.124	0	6.69	3
MRP17	lightblue	0.358	0.056	0.158	0.363	0.363	6.58	0	3
PDX3	lightblue	0.264	0.059	0.225	0.266	0.265	2.89	0	3
PEP7	lightblue	0.257	0.056	0.216	0.255	0.251	0	0.84	2
ALD6	lightblue	0.278	0.06	0.218	0.282	0.289	6.44	0.24	3
YDR179W-A	lightblue	0.327	0.059	0.181	0.331	0.33	3.51	0	3
RPS22B	lightblue	0.355	0.059	0.165	0.364	0.367	8.62	0	3
BRE5	lightblue	0.356	0.051	0.142	0.363	0.37	7.46	0	3
LYS20	lightblue	0.287	0.042	0.146	0.289	0.293	3.43	0	3
COX16	lightblue	0.372	0.068	0.182	0.386	0.393	14.89	0	2
MSH1	lightblue	0.216	0.064	0.296	0.216	0.216	2.09	1.54	3
MRP7	lightblue	0.316	0.057	0.179	0.32	0.329	5.16	0	2
VAN1	lightblue	0.373	0.062	0.166	0.385	0.393	11.55	0	2
ERG3	lightblue	0.316	0.037	0.118	0.319	0.317	4.52	0	3
RTK1	lightblue	0.373	0.059	0.159	0.382	0.382	8.2	0	2
SPT4	lightblue	0.179	0.062	0.349	0.172	0.162	0	12.32	2
YHM2	lightblue	0.362	0.061	0.168	0.371	0.374	7.56	0	2
MET3	lightblue	0.38	0.066	0.174	0.393	0.397	12.22	0	3
YIL060W	lightblue	0.372	0.063	0.17	0.381	0.393	12.16	0	3
GEP5	lightblue	0.33	0.056	0.169	0.334	0.335	3.26	0	3
MRPS16	lightblue	0.321	0.051	0.16	0.325	0.327	3.24	0	3
BIK1	lightblue	0.37	0.067	0.182	0.378	0.386	10.53	0	3
PAP2	lightblue	0.376	0.061	0.163	0.386	0.39	8.66	0	2
RTF1	lightblue	0.312	0.047	0.15	0.316	0.314	5.88	0	2
YOL050C	lightblue	0.334	0.052	0.157	0.339	0.342	6.28	0	3
ERG2	lightblue	0.378	0.06	0.159	0.386	0.383	8.07	0	2
VPS33	lightblue	0.355	0.059	0.169	0.361	0.365	6.5	0	3
URA7	lightblue	0.371	0.061	0.165	0.381	0.388	8.07	0	3
SWD3	lightblue	0.339	0.054	0.16	0.342	0.34	6.14	0	3
FYV7	lightblue	0.314	0.049	0.156	0.317	0.314	4.41	0	3
YGR067C	lightblue	0.385	0.058	0.15	0.395	0.398	9.98	0	3
RPL14A	lightblue	0.292	0.037	0.126	0.292	0.287	1.46	0.91	2
EGD1	lightblue	0.371	0.07	0.189	0.382	0.393	11.35	0	3
YME1	lightblue	0.258	0.045	0.175	0.257	0.254	0.77	1.32	2
RPS1B	lightblue	0.369	0.06	0.163	0.377	0.39	11.25	0	2
YGR226C	lightblue	0.36	0.059	0.166	0.371	0.374	9.87	0	3
TPM1	lightblue	0.351	0.051	0.146	0.361	0.367	9.25	0	3
TPS1	lightblue	0.315	0.049	0.157	0.319	0.319	4.53	0	3
FSH1	lightblue	0.369	0.063	0.17	0.379	0.384	10.74	0	3
UBP15	lightblue	0.369	0.066	0.18	0.376	0.382	8.39	0	3
ILM1	lightblue	0.293	0.068	0.233	0.296	0.291	6.08	0.88	3
SLX8	lightblue	0.356	0.059	0.167	0.364	0.372	7.66	0	3
SOV1	lightblue	0.349	0.052	0.15	0.354	0.357	4.89	0	2
RPS19A	lightblue	0.331	0.048	0.145	0.336	0.335	5.82	0	3
MSM1	lightblue	0.343	0.056	0.164	0.348	0.351	7.34	0	3
YGL152C	lightblue	0.342	0.051	0.15	0.35	0.354	7.56	0	3
YLR358C	lightblue	0.38	0.053	0.14	0.386	0.383	8.59	0	3
RPB9	lightblue	0.27	0.045	0.166	0.271	0.268	3.32	0.32	3
RSM7	lightblue	0.26	0.06	0.23	0.26	0.257	3.51	1.22	3
URC2	lightblue	0.35	0.06	0.173	0.357	0.363	6.57	0	3
YML102C-A	lightblue	0.336	0.046	0.138	0.34	0.344	6.92	0	3
CCR4	lightblue	0.343	0.056	0.164	0.348	0.351	7.29	0	3
HTB2	lightblue	0.332	0.052	0.157	0.335	0.33	2.93	0.19	3
ENT2	lightblue	0.383	0.063	0.165	0.395	0.397	11.86	0	3
URA5	lightblue	0.376	0.062	0.166	0.385	0.39	9.23	0	3
ZRT1	lightblue	0.308	0.069	0.224	0.306	0.295	1.72	3.08	3
VPS34	lightblue	0.364	0.073	0.201	0.373	0.393	12.27	0	3
VPS41	lightblue	0.29	0.069	0.236	0.291	0.289	2.99	0.27	3
HSP82	lightblue	0.374	0.064	0.171	0.386	0.389	11.36	0	3
MEI5	lightblue	0.381	0.058	0.151	0.391	0.394	9.6	0	3
SAM1	lightblue	0.363	0.067	0.183	0.374	0.379	11.39	0	2
RPS27B	lightblue	0.27	0.042	0.157	0.272	0.272	1.22	0.72	2
RPS11B	lightblue	0.337	0.047	0.141	0.343	0.346	7.01	0	3
RIM20	lightblue	0.356	0.061	0.172	0.365	0.371	9.66	0	3
SEM1	lightblue	0.353	0.057	0.162	0.36	0.369	9.53	0	3
SHR5	lightblue	0.374	0.062	0.166	0.381	0.383	7.38	0	3
GND1	lightblue	0.18	0.062	0.348	0.173	0.151	0	11.38	3
MRPL40	lightblue	0.351	0.053	0.152	0.356	0.359	6.06	0	3
HAP4	lightblue	0.34	0.076	0.223	0.346	0.357	9.3	0	3
RPL34B	lightblue	0.305	0.05	0.165	0.313	0.322	6.93	0	3
YKL075C	lightblue	0.364	0.054	0.149	0.371	0.375	10.19	0	3
FLC1	lightblue	0.376	0.06	0.159	0.387	0.39	11.33	0	3
HOM2	lightblue	0.356	0.054	0.151	0.362	0.363	6.22	0	3
MGA2	lightblue	0.351	0.051	0.144	0.357	0.361	8.49	0	3
SER1	lightblue	0.143	0.041	0.288	0.139	0.132	0	5.79	3
SIS2	lightblue	0.35	0.058	0.166	0.359	0.363	8.64	0	3
YMR166C	lightblue	0.366	0.068	0.185	0.379	0.394	15.03	0	3
ARP5	lightblue	0.327	0.061	0.188	0.33	0.335	3.24	0	3
DHH1	lightblue	0.354	0.051	0.143	0.362	0.366	9.76	0	3
YJL211C	lightblue	0.375	0.069	0.182	0.386	0.394	12.1	0	2
RPL6B	lightblue	0.322	0.049	0.15	0.326	0.323	5.27	0	2
RPL24B	lightblue	0.367	0.064	0.174	0.378	0.381	11.92	0	2
SEA4	lightblue	0.366	0.057	0.154	0.377	0.381	12.35	0	2
RPL12B	lightblue	0.351	0.049	0.14	0.357	0.359	4.7	0	2
YAP1	lightblue	0.365	0.052	0.143	0.372	0.372	7.17	0	2
PSR1	lightblue	0.366	0.067	0.184	0.38	0.387	11.79	0	3
RPS7A	lightblue	0.257	0.052	0.201	0.259	0.256	3.51	0	3
RRP8	lightblue	0.327	0.053	0.163	0.33	0.329	6.82	0	3
YDR290W	lightblue	0.366	0.059	0.162	0.373	0.375	7.31	0	3
MAK32	lightblue	0.376	0.059	0.158	0.386	0.391	11.66	0	3
YNL211C	lightblue	0.375	0.058	0.154	0.385	0.385	8.5	0	3
MUD2	lightblue	0.342	0.062	0.181	0.349	0.35	7.63	0	2
MTG2	lightblue	0.332	0.053	0.159	0.339	0.342	7.52	0	3
KIN4	lightblue	0.352	0.059	0.168	0.359	0.359	8.32	0	3
RAD5	lightblue	0.366	0.069	0.19	0.377	0.386	12.6	0	3
NUP2	lightblue	0.379	0.06	0.158	0.388	0.388	8.65	0	3
KSS1	lightblue	0.374	0.066	0.177	0.386	0.391	11.45	0	3
REE1	lightblue	0.388	0.06	0.156	0.398	0.398	9.09	0	3
TPS2	lightblue	0.361	0.062	0.171	0.372	0.377	13.09	0	3
RPS23B	lightblue	0.376	0.066	0.174	0.387	0.393	13.11	0	2
MHR1	lightblue	0.344	0.064	0.186	0.353	0.361	8.66	0	2
VPS20	lightblue	0.351	0.058	0.165	0.36	0.365	9.81	0	2
SCS7	lightblue	0.373	0.052	0.14	0.381	0.384	8.37	0	2
RIM9	lightblue	0.355	0.059	0.167	0.364	0.368	9.96	0	2
RRG7	lightblue	0.353	0.067	0.191	0.362	0.379	14.66	0	3
IMP1	lightblue	0.363	0.059	0.162	0.373	0.377	10.29	0	3
SEO1	lightblue	0.361	0.061	0.17	0.371	0.385	11.73	0	3
NAT1	lightblue	0.352	0.055	0.156	0.358	0.36	5.28	0	3
BEM2	lightblue	0.351	0.066	0.188	0.357	0.366	9.83	0	3
FOX2	lightblue	0.379	0.068	0.179	0.389	0.394	9.42	0	3
YNL109W	lightblue	0.362	0.049	0.136	0.369	0.377	7.44	0	3
ARP6	lightblue	0.357	0.063	0.176	0.369	0.375	10.19	0	3
YGR272C	lightblue	0.236	0.049	0.208	0.235	0.233	0	0.1	2
MET22	lightblue	0.347	0.056	0.16	0.351	0.351	7.51	0	2
WHI2	lightblue	0.35	0.058	0.166	0.355	0.358	4.99	0	3
MRP21	lightblue	0.355	0.052	0.147	0.358	0.36	5.24	0	3
RPL37B	lightblue	0.344	0.057	0.165	0.348	0.351	4.71	0	3
GET1	lightblue	0.33	0.054	0.165	0.336	0.337	6.28	0	3
RPS24B	lightblue	0.371	0.051	0.138	0.378	0.379	7.71	0	3
DOG2	lightblue	0.373	0.061	0.162	0.382	0.388	11.44	0	3
MRPS9	lightblue	0.376	0.067	0.178	0.389	0.394	12.14	0	2
YGR050C	lightblue	0.359	0.064	0.176	0.368	0.374	10.48	0	2
GUS1	lightblue	0.352	0.056	0.16	0.356	0.358	4.82	0	2
RPS17A	lightblue	0.286	0.043	0.151	0.288	0.29	2.04	0	2
LCB5	lightblue	0.365	0.051	0.14	0.369	0.37	6.76	0	2
RTT109	lightblue	0.2	0.051	0.256	0.2	0.198	1.18	2.55	3
RIM11	lightblue	0.377	0.06	0.159	0.385	0.388	8.54	0	3
YML082W	lightblue	0.371	0.061	0.165	0.384	0.391	11.58	0	3
YJL144W	lightblue	0.388	0.06	0.154	0.397	0.397	9.59	0	3
ATG32	lightblue	0.378	0.063	0.168	0.39	0.39	12.19	0	3
SKI2	lightblue	0.339	0.06	0.178	0.347	0.354	5.14	0	2
BUD14	lightblue	0.37	0.051	0.138	0.378	0.378	7.57	0	2
STE3	lightblue	0.371	0.066	0.178	0.383	0.39	11.75	0	3
CCE1	lightblue	0.282	0.1	0.355	0.275	0.242	0	22.58	3
ISA1	lightblue	0.365	0.047	0.129	0.37	0.367	4.81	0	2
RPP1A	lightblue	0.321	0.057	0.178	0.325	0.319	6.61	0	2
SWD1	lightblue	0.341	0.051	0.151	0.346	0.351	7.12	0	3
REF2	lightblue	0.367	0.07	0.191	0.377	0.39	12.81	0	2
FYV12	lightblue	0.358	0.059	0.164	0.369	0.374	10.72	0	2
PCL7	lightblue	0.373	0.066	0.177	0.384	0.39	8.9	0	3
YLF2	lightblue	0.373	0.059	0.159	0.384	0.387	7.46	0	3
IMG1	lightblue	0.364	0.055	0.151	0.369	0.374	5.7	0	3
MEH1	lightblue	0.34	0.041	0.122	0.341	0.343	3.22	0.48	3
PET309	lightblue	0.356	0.059	0.166	0.364	0.364	9.95	0	3
RPS18B	lightblue	0.329	0.045	0.137	0.333	0.338	6.35	0	3
YOR309C	lightblue	0.293	0.045	0.154	0.296	0.294	3.86	0	3
YKE2	lightblue	0.354	0.058	0.165	0.364	0.37	10.06	0	3
YJR037W	lightblue	0.371	0.056	0.151	0.378	0.377	7.11	0	3
UPS1	lightblue	0.343	0.072	0.21	0.35	0.36	9.64	0	3
ZWF1	lightblue	0.364	0.063	0.173	0.377	0.383	11.4	0	2
PHO85	lightblue	0.271	0.045	0.166	0.276	0.281	4.71	0	2
SSO2	lightblue	0.386	0.059	0.154	0.394	0.393	9	0	3
TWF1	lightblue	0.37	0.066	0.177	0.382	0.389	11.91	0	3
SIT4	lightblue	0.191	0.056	0.295	0.189	0.187	0.75	3.05	3
YDR442W	lightblue	0.366	0.062	0.168	0.378	0.382	12.22	0	3
SLX9	lightblue	0.329	0.045	0.136	0.333	0.339	3.25	0	3
MCT1	lightblue	0.35	0.054	0.156	0.358	0.36	8.8	0	2
LRS4	lightblue	0.384	0.06	0.158	0.393	0.391	8.51	0	2
RPL9B	lightblue	0.354	0.065	0.182	0.363	0.368	10.16	0	2
LSM1	lightblue	0.379	0.059	0.155	0.386	0.391	8.86	0	3
CMR1	lightblue	0.38	0.068	0.18	0.392	0.394	12	0	3
PSY3	lightblue	0.378	0.065	0.173	0.39	0.397	12.48	0	3
THI4	lightblue	0.38	0.059	0.155	0.391	0.396	8.66	0	3
MGR2	lightblue	0.379	0.067	0.178	0.392	0.399	13.32	0	3
NCS6	lightblue	0.323	0.047	0.145	0.328	0.325	6.5	0	3
YLR184W	lightblue	0.293	0.04	0.138	0.295	0.291	2.13	0	3
RPL7A	lightblue	0.309	0.064	0.207	0.317	0.326	8.43	0	2
NPL6	lightblue	0.365	0.06	0.165	0.374	0.374	10.13	0	3
FIS1	lightblue	0.364	0.066	0.182	0.374	0.381	11.11	0	3
CNM67	lightblue	0.32	0.057	0.177	0.325	0.333	5.95	0	3
BRE2	lightblue	0.36	0.056	0.155	0.369	0.373	11.89	0	3
CBR1	lightblue	0.359	0.05	0.14	0.367	0.367	6.53	0	3
ECM7	lightblue	0.358	0.072	0.2	0.37	0.375	11.37	0	3
BIO4	lightblue	0.371	0.064	0.173	0.382	0.384	11.83	0	3
PCP1	lightblue	0.325	0.055	0.168	0.33	0.332	6.01	0	3
RPL42B	lightblue	0.313	0.053	0.171	0.314	0.316	2.53	0	3
YDJ1	lightblue	0.258	0.04	0.155	0.258	0.255	2.78	0	3
SOL2	lightblue	0.368	0.071	0.192	0.379	0.382	11.73	0	2
VPS27	lightblue	0.366	0.057	0.156	0.374	0.377	7.19	0	2
YBL071C-B	lightblue	0.314	0.074	0.238	0.319	0.324	5.29	0	2
VPS28	lightblue	0.361	0.059	0.165	0.367	0.368	6.52	0	2
MTM1	lightblue	0.332	0.048	0.144	0.333	0.335	3.1	0	3
DCC1	lightblue	0.355	0.067	0.19	0.367	0.38	13.94	0	3
MRPL35	lightblue	0.355	0.049	0.137	0.357	0.352	3.82	0	3
RPP2B	lightblue	0.275	0.047	0.171	0.278	0.281	4.2	0	3
PNS1	lightblue	0.366	0.063	0.172	0.379	0.388	11.58	0	3
YJR128W	lightblue	0.378	0.06	0.159	0.388	0.394	8.86	0	3
MNN5	lightblue	0.387	0.061	0.158	0.397	0.398	9.37	0	3
FAR1	lightblue	0.383	0.061	0.159	0.393	0.394	8.26	0	3
RTC4	lightblue	0.381	0.057	0.149	0.39	0.395	8.83	0	3
BER1	lightblue	0.379	0.065	0.172	0.39	0.396	12	0	3
SAT4	lightblue	0.38	0.064	0.169	0.39	0.391	12.2	0	3
IES5	lightblue	0.368	0.064	0.173	0.38	0.385	14.31	0	3
CGR1	lightblue	0.371	0.049	0.131	0.377	0.378	7.52	0	3
NOT3	lightblue	0.357	0.059	0.165	0.367	0.37	10.99	0	3
YNL205C	lightblue	0.363	0.058	0.16	0.374	0.379	10.77	0	3
UBC11	lightblue	0.378	0.056	0.148	0.385	0.382	7.71	0	2
ATG36	lightblue	0.369	0.061	0.166	0.378	0.383	7.58	0	2
SPC72	lightblue	0.364	0.066	0.182	0.375	0.389	16.58	0	3
OPI8	lightblue	0.348	0.046	0.133	0.353	0.353	7.98	0	3
KAP122	lightblue	0.345	0.056	0.162	0.353	0.355	9	0	3
RCO1	lightblue	0.363	0.068	0.187	0.376	0.386	13.04	0	3
RPL26A	lightblue	0.371	0.061	0.165	0.382	0.38	10.89	0	3
PEX4	lightblue	0.366	0.064	0.175	0.379	0.387	13.38	0	2
SIZ1	lightblue	0.37	0.062	0.168	0.382	0.386	12.73	0	3
YIL001W	lightblue	0.37	0.064	0.173	0.384	0.387	14.39	0	2
TMA22	lightblue	0.375	0.062	0.165	0.383	0.384	7.69	0	2
COQ6	lightblue	0.375	0.069	0.184	0.389	0.393	12.35	0	3
LRP1	lightblue	0.325	0.052	0.16	0.33	0.329	5.72	0	3
TRM12	lightblue	0.387	0.055	0.143	0.394	0.389	8.16	0	2
NOP12	lightblue	0.314	0.054	0.174	0.32	0.336	6.85	0	2
SPO7	lightblue	0.373	0.058	0.157	0.384	0.39	12.4	0	2
PIN4	lightblue	0.373	0.05	0.133	0.38	0.385	5.67	0	2
FLX1	lightblue	0.372	0.053	0.143	0.377	0.374	6.3	0	3
RPL19B	lightblue	0.314	0.043	0.138	0.316	0.319	2.03	0.27	3
CYK3	lightblue	0.359	0.057	0.16	0.368	0.374	10.56	0	3
GCS1	lightblue	0.371	0.062	0.166	0.38	0.381	7.25	0	3
YOL085C	lightblue	0.378	0.06	0.158	0.389	0.391	8.78	0	3
PEX1	lightblue	0.36	0.064	0.179	0.374	0.385	11.97	0	3
YLR290C	lightblue	0.363	0.063	0.174	0.368	0.37	6.38	0	3
MSN2	lightblue	0.375	0.071	0.189	0.392	0.398	13.98	0	3
ZUO1	lightblue	0.287	0.052	0.181	0.289	0.288	3.49	0	3
RDS1	lightblue	0.379	0.064	0.17	0.391	0.394	12.5	0	3
XBP1	lightblue	0.371	0.065	0.176	0.384	0.389	12.21	0	3
AKR1	lightblue	0.363	0.062	0.172	0.373	0.383	11.88	0	2
MRP51	lightblue	0.353	0.049	0.139	0.357	0.361	5.69	0	3
RPS4A	lightblue	0.352	0.041	0.117	0.356	0.355	4.85	0	3
RPS24A	lightblue	0.324	0.059	0.182	0.33	0.331	6.64	0	3
MRP4	lightblue	0.352	0.058	0.164	0.357	0.361	5.3	0	3
FIR1	lightblue	0.379	0.058	0.154	0.388	0.389	8.55	0	3
SLZ1	lightblue	0.373	0.069	0.185	0.387	0.398	13.93	0	3
RAD55	lightblue	0.367	0.062	0.17	0.372	0.369	5.78	0	2
JJJ2	lightblue	0.359	0.066	0.184	0.372	0.381	12.74	0	3
RPL19A	lightblue	0.328	0.048	0.147	0.332	0.336	6.47	0	3
PDA1	lightblue	0.372	0.07	0.189	0.387	0.392	13.63	0	3
HMI1	lightblue	0.37	0.063	0.17	0.383	0.388	12.62	0	3
CAC2	lightblue	0.353	0.048	0.136	0.358	0.361	5.32	0	3
YVH1	lightblue	0.376	0.067	0.179	0.387	0.394	12.6	0	3
BCH1	lightblue	0.378	0.06	0.158	0.389	0.393	8.61	0	3
YDL119C	lightblue	0.335	0.053	0.158	0.337	0.338	2.69	0.26	3
EAF7	lightblue	0.382	0.059	0.155	0.391	0.395	8.98	0	3
OST4	lightblue	0.351	0.058	0.166	0.359	0.365	9.44	0	3
VAM6	lightblue	0.376	0.068	0.181	0.391	0.395	12.67	0	3
FTR1	lightblue	0.289	0.05	0.172	0.292	0.295	4.06	0	3
RPS29A	lightblue	0.316	0.046	0.146	0.321	0.328	6.82	0	3
SPT10	lightblue	0.248	0.042	0.168	0.251	0.259	3.03	0	3
ATC1	lightblue	0.36	0.058	0.161	0.368	0.371	10.89	0	3
YLR111W	lightblue	0.334	0.053	0.16	0.341	0.343	7.55	0	3
BUD30	lightblue	0.282	0.056	0.198	0.284	0.289	3.45	0	3
MSW1	lightblue	0.343	0.058	0.17	0.35	0.352	9.42	0	3
RSM19	lightblue	0.332	0.06	0.182	0.336	0.338	6.89	0	3
YOR062C	lightblue	0.368	0.063	0.171	0.38	0.385	12.22	0	3
YKL069W	lightblue	0.359	0.067	0.185	0.373	0.383	14.54	0	2
RLF2	lightblue	0.355	0.041	0.117	0.359	0.364	4.81	0	2
CBP2	lightblue	0.352	0.079	0.223	0.366	0.375	11.3	0	2
SBP1	lightblue	0.343	0.059	0.172	0.352	0.356	9.11	0	3
RTT101	lightblue	0.368	0.068	0.185	0.38	0.39	12.15	0	3
MRPL49	lightblue	0.344	0.063	0.182	0.351	0.367	10.57	0	3
ATP5	lightblue	0.335	0.048	0.142	0.336	0.332	2	0	2
ISU1	lightblue	0.376	0.059	0.157	0.385	0.387	7.99	0	3
NAM2	lightblue	0.325	0.054	0.165	0.326	0.325	0.45	1.87	3
AEP1	lightblue	0.323	0.046	0.142	0.324	0.325	1.46	0.15	2
SSK1	lightblue	0.367	0.06	0.163	0.377	0.382	11.98	0	3
USA1	lightblue	0.371	0.06	0.161	0.383	0.388	12.85	0	3
YNL170W	lightblue	0.249	0.043	0.171	0.253	0.256	5.23	0	3
MEF1	lightblue	0.3	0.058	0.193	0.302	0.304	4.24	0	3
RPL16A	lightblue	0.338	0.055	0.163	0.345	0.348	8.11	0	3
PEF1	lightblue	0.373	0.058	0.157	0.382	0.383	11.26	0	3
RPL9A	lightblue	0.32	0.05	0.156	0.327	0.329	7.61	0	3
FEN2	lightblue	0.158	0.048	0.3	0.155	0.157	0	4.16	2
CGI121	lightblue	0.358	0.046	0.13	0.359	0.356	2.71	0.49	2
PPQ1	lightblue	0.371	0.062	0.169	0.379	0.388	7.89	0	2
MRP10	lightblue	0.366	0.063	0.172	0.378	0.382	13	0	2
YDL009C	lightblue	0.376	0.061	0.163	0.387	0.392	7.5	0	2
YOR097C	lightblue	0.382	0.068	0.177	0.395	0.398	13.04	0	3
HER2	lightblue	0.355	0.055	0.154	0.36	0.361	5.21	0	3
RAD54	lightblue	0.362	0.07	0.192	0.375	0.384	13.63	0	3
PTK2	lightblue	0.365	0.052	0.143	0.373	0.376	6.94	0	3
GIM5	lightblue	0.357	0.057	0.159	0.364	0.369	10.84	0	3
YKR047W	lightblue	0.38	0.058	0.152	0.391	0.395	8.34	0	2
VPS71	lightblue	0.354	0.063	0.177	0.366	0.372	12.31	0	3
ILV1	lightblue	0.36	0.063	0.175	0.371	0.375	11.36	0	3
SPE1	lightblue	0.134	0.045	0.339	0.131	0.128	0	6.49	2
CYT2	lightblue	0.352	0.066	0.188	0.366	0.377	12.21	0	2
YGR160W	lightblue	0.351	0.066	0.186	0.358	0.371	11.3	0	2
TIF1	lightblue	0.377	0.048	0.127	0.384	0.386	7.47	0	3
LEO1	lightblue	0.349	0.064	0.182	0.36	0.369	11.22	0	3
YGR266W	lightblue	0.37	0.064	0.174	0.384	0.387	12.33	0	3
RPL22A	lightblue	0.242	0.047	0.197	0.242	0.244	0	2	2
PEX22	lightblue	0.368	0.069	0.187	0.382	0.388	13.78	0	3
SWI5	lightblue	0.365	0.049	0.134	0.375	0.385	12.63	0	3
NPR3	lightblue	0.375	0.062	0.166	0.387	0.39	12.55	0	3
LGE1	lightblue	0.299	0.049	0.163	0.304	0.308	5.26	0	3
YIL077C	lightblue	0.35	0.059	0.17	0.359	0.359	10.16	0	2
DOT5	lightblue	0.367	0.07	0.191	0.384	0.391	14.14	0	2
YER077C	lightblue	0.365	0.067	0.184	0.379	0.382	13.16	0	2
IKI1	lightblue	0.323	0.045	0.141	0.325	0.325	1.46	0	2
COA4	lightblue	0.34	0.055	0.163	0.349	0.352	8.86	0	2
VMA4	lightblue	0.347	0.055	0.157	0.353	0.361	9.61	0	3
YJR087W	lightblue	0.369	0.055	0.149	0.378	0.386	7.7	0	3
RPL36A	lightblue	0.36	0.057	0.159	0.363	0.363	3.54	0	3
MRF1	lightblue	0.363	0.052	0.143	0.367	0.365	4.73	0	2
MNL1	lightblue	0.372	0.062	0.168	0.384	0.391	12.38	0	3
RPL8B	lightblue	0.362	0.052	0.143	0.367	0.368	5.58	0	3
JJJ1	lightblue	0.376	0.058	0.154	0.385	0.388	8.18	0	3
TVP18	lightblue	0.345	0.045	0.13	0.348	0.353	3.25	0	3
NUP188	lightblue	0.34	0.055	0.161	0.348	0.346	10.04	0	3
RAV2	lightblue	0.367	0.069	0.188	0.381	0.39	12.77	0	3
CTS2	lightblue	0.372	0.064	0.173	0.386	0.392	13.51	0	3
NIT3	lightblue	0.382	0.062	0.161	0.393	0.395	8.74	0	3
ISM1	lightblue	0.358	0.064	0.178	0.367	0.381	12.2	0	3
RPP1B	lightblue	0.329	0.051	0.154	0.335	0.338	8.19	0	3
MSD1	lightblue	0.356	0.055	0.154	0.36	0.358	4.07	0	2
ARG7	lightblue	0.373	0.064	0.171	0.385	0.389	13.06	0	2
RRT16	lightblue	0.379	0.067	0.177	0.393	0.393	13.12	0	3
SHU2	lightblue	0.345	0.049	0.143	0.349	0.351	3.35	0	3
YGL149W	lightblue	0.365	0.061	0.168	0.377	0.385	12.58	0	3
ETR1	lightblue	0.36	0.072	0.2	0.376	0.385	13.47	0	3
PNC1	lightblue	0.36	0.061	0.17	0.372	0.374	11.21	0	3
COX13	lightblue	0.377	0.055	0.146	0.38	0.378	3.63	0.8	2
DBP1	lightblue	0.366	0.062	0.169	0.377	0.375	11.8	0	2
PMR1	lightblue	0.303	0.047	0.155	0.31	0.313	6.83	0	2
MRN1	lightblue	0.341	0.062	0.182	0.354	0.362	12.34	0	3
ATP2	lightblue	0.372	0.055	0.147	0.379	0.377	6.06	0	3
YPR012W	lightblue	0.361	0.061	0.169	0.372	0.375	11.45	0	3
TUF1	lightblue	0.344	0.051	0.148	0.348	0.348	3.66	0	3
YCR001W	lightblue	0.378	0.066	0.174	0.392	0.397	14.49	0	3
RPS4B	lightblue	0.318	0.046	0.146	0.323	0.329	6.84	0	2
VPS51	lightblue	0.34	0.061	0.18	0.346	0.35	9.5	0	2
VPS62	lightblue	0.358	0.072	0.201	0.372	0.376	13.38	0	2
SWM1	lightblue	0.389	0.066	0.169	0.397	0.396	7.22	0	3
TRM7	lightblue	0.363	0.068	0.188	0.375	0.383	12.37	0	3
KAP123	lightblue	0.357	0.043	0.121	0.36	0.358	3.38	0.58	3
MET18	lightblue	0.301	0.043	0.145	0.305	0.307	5.44	0	2
MRM1	lightblue	0.359	0.055	0.153	0.363	0.365	4.37	0	2
BCH2	lightblue	0.352	0.045	0.128	0.356	0.359	3.79	0	2
PEX15	lightblue	0.367	0.075	0.206	0.382	0.393	14.14	0	2
CBS1	lightblue	0.363	0.075	0.207	0.378	0.39	13.39	0	2
STP1	lightblue	0.362	0.053	0.147	0.368	0.368	5.47	0	3
YPL260W	lightblue	0.303	0.049	0.161	0.305	0.303	0.99	0.88	2
DSS1	lightblue	0.365	0.06	0.165	0.37	0.367	4.96	0	3
MRPL15	lightblue	0.351	0.059	0.167	0.353	0.348	2.81	0	3
SEC23	lightblue	0.357	0.06	0.167	0.365	0.37	11.6	0	3
NCS2	lightblue	0.323	0.05	0.154	0.331	0.336	9.42	0	3
IWR1	lightblue	0.313	0.05	0.16	0.317	0.318	6.57	0	3
MSN4	lightblue	0.376	0.069	0.183	0.391	0.397	13.52	0	3
RPS17B	lightblue	0.372	0.058	0.155	0.377	0.382	6.32	0	3
KCS1	lightblue	0.298	0.054	0.182	0.302	0.306	6.05	0	3
CIN8	lightblue	0.381	0.053	0.139	0.387	0.384	7.5	0	3
YDL157C	lightblue	0.379	0.058	0.154	0.386	0.388	7.51	0	3
RPS23A	lightblue	0.334	0.042	0.125	0.336	0.336	1.94	0.28	3
RPS16B	lightblue	0.326	0.055	0.168	0.333	0.341	9.41	0	2
GGA2	lightblue	0.366	0.061	0.168	0.377	0.383	12.45	0	3
ARR1	lightblue	0.37	0.066	0.178	0.384	0.388	12.64	0	3
YPT6	lightblue	0.374	0.051	0.137	0.378	0.375	4.52	0	2
AVL9	lightblue	0.361	0.053	0.148	0.364	0.368	4.52	0	2
UME6	lightblue	0.341	0.066	0.193	0.348	0.354	10.57	0	2
MRPL20	lightblue	0.366	0.057	0.157	0.371	0.372	5.11	0	2
RPS28B	lightblue	0.3	0.054	0.181	0.305	0.308	5.75	0	2
PEX32	lightblue	0.364	0.049	0.134	0.37	0.375	6.17	0	3
ARO7	lightblue	0.352	0.063	0.179	0.364	0.373	12.87	0	3
MKC7	lightblue	0.374	0.06	0.161	0.382	0.385	7.18	0	3
MSI1	lightblue	0.367	0.057	0.156	0.372	0.373	6.17	0	3
MRPL11	lightblue	0.364	0.061	0.166	0.369	0.376	6.42	0	3
YGL218W	lightblue	0.377	0.069	0.183	0.392	0.4	15.85	0	3
RPN10	lightblue	0.343	0.062	0.182	0.355	0.359	10.51	0	3
ATE1	lightblue	0.37	0.065	0.176	0.385	0.389	13.4	0	3
PEX12	lightblue	0.34	0.063	0.184	0.345	0.344	7.89	0	3
SSA4	lightblue	0.366	0.048	0.13	0.37	0.371	5.35	0	3
YBR277C	lightblue	0.359	0.068	0.189	0.372	0.373	13.82	0	2
RHB1	lightblue	0.368	0.067	0.182	0.383	0.388	14.67	0	2
MTQ2	lightblue	0.362	0.068	0.188	0.376	0.384	13.45	0	2
ELP3	lightblue	0.341	0.059	0.174	0.35	0.358	9.97	0	2
YAP5	lightblue	0.367	0.061	0.167	0.38	0.389	12.78	0	3
UGO1	lightblue	0.204	0.055	0.27	0.203	0.204	0.23	1.46	3
GTF1	lightblue	0.366	0.044	0.119	0.37	0.373	5.41	0	3
UBC7	lightblue	0.382	0.057	0.149	0.389	0.385	6.79	0	2
GTR1	lightblue	0.348	0.059	0.169	0.356	0.37	11.81	0	2
UBA4	lightblue	0.32	0.053	0.166	0.327	0.331	7.4	0	3
RPS25A	lightblue	0.349	0.058	0.166	0.359	0.365	11.18	0	3
SEC66	lightblue	0.377	0.063	0.168	0.389	0.393	13.05	0	3
PIB2	lightblue	0.391	0.053	0.136	0.398	0.399	8.21	0	3
SSD1	lightblue	0.352	0.063	0.178	0.367	0.379	14.53	0	2
SWS2	lightblue	0.35	0.062	0.177	0.358	0.356	12.96	0	2
RNY1	lightblue	0.383	0.054	0.141	0.392	0.392	8.15	0	3
PBP1	lightblue	0.383	0.057	0.148	0.392	0.394	8.09	0	3
MRS4	lightblue	0.353	0.058	0.164	0.364	0.364	10.16	0	3
AIM10	lightblue	0.202	0.055	0.273	0.2	0.197	0	0.27	2
VMA7	lightblue	0.175	0.057	0.324	0.174	0.173	0	1.46	2
RCY1	lightblue	0.191	0.052	0.273	0.189	0.176	0.07	0.43	2
FUR4	lightblue	0.116	0.031	0.268	0.113	0.115	0	3.65	2
RTG1	lightblue	0.171	0.048	0.279	0.169	0.17	0	3.26	3
RTG3	lightblue	0.191	0.057	0.301	0.19	0.187	0.42	0.42	3
GRX5	lightblue	0.195	0.044	0.226	0.194	0.191	0.31	0.41	3
MNN10	darkgreen	0.282	0.045	0.161	0.282	0.278	0	0.33	2
RPL43A	darkgreen	0.259	0.07	0.269	0.252	0.235	0	15.55	2
SSE1	darkgreen	0.283	0.044	0.157	0.283	0.291	0.47	0.52	2
RIC1	darkgreen	0.212	0.064	0.304	0.201	0.188	0	17.03	3
ATP17	darkgreen	0.35	0.045	0.13	0.35	0.349	0.1	0.78	2
GLO3	darkgreen	0.275	0.037	0.136	0.276	0.275	0.46	0.56	3
RPS10A	darkgreen	0.285	0.058	0.204	0.279	0.274	0	10.23	3
RRD1	darkgreen	0.38	0.063	0.165	0.382	0.38	1.33	1.64	2
PET123	darkgreen	0.372	0.068	0.182	0.373	0.365	0.51	0.78	2
RTC6	darkgreen	0.335	0.068	0.204	0.333	0.323	0	5.15	3
MEF2	magenta	0.333	0.069	0.207	0.341	0.34	8.69	0	3
RPS6B	magenta	0.315	0.043	0.136	0.319	0.324	6.07	0	3
COQ8	magenta	0.36	0.068	0.188	0.375	0.383	13.14	0	3
DOA1	magenta	0.357	0.061	0.171	0.371	0.378	14.36	0	2
NEM1	magenta	0.356	0.074	0.209	0.372	0.38	15.46	0	2
RAI1	magenta	0.278	0.047	0.172	0.281	0.283	4.59	0	2
MSF1	magenta	0.354	0.068	0.192	0.363	0.372	13.05	0	2
RIM8	magenta	0.352	0.072	0.203	0.368	0.377	14.07	0	2
SMF2	magenta	0.374	0.064	0.172	0.388	0.392	13.04	0	3
ARC1	magenta	0.299	0.052	0.174	0.303	0.303	5.28	0	3
MRPL16	magenta	0.306	0.06	0.195	0.31	0.314	5.54	0	3
IST3	magenta	0.308	0.055	0.178	0.314	0.323	7.69	0	2
HCR1	magenta	0.27	0.051	0.188	0.271	0.273	4.36	0	3
PRK1	magenta	0.359	0.063	0.176	0.371	0.375	11.73	0	3
ELP2	magenta	0.32	0.063	0.195	0.326	0.327	7.88	0	3
NSR1	magenta	0.266	0.042	0.16	0.269	0.272	5.79	0	2
ERG4	magenta	0.359	0.069	0.192	0.377	0.388	15.52	0	2
RPL13B	magenta	0.245	0.06	0.244	0.245	0.243	3.52	0	3
MRT4	magenta	0.294	0.052	0.177	0.298	0.3	5.32	0	3
VPS72	magenta	0.358	0.067	0.187	0.371	0.38	14.15	0	3
RPS11A	magenta	0.351	0.06	0.172	0.361	0.371	13.12	0	3
PEX13	magenta	0.361	0.06	0.166	0.373	0.38	12.73	0	3
RPS6A	magenta	0.342	0.047	0.136	0.349	0.349	8.66	0	3
LYS9	magenta	0.364	0.066	0.181	0.378	0.389	13.52	0	3
SNF7	magenta	0.347	0.067	0.194	0.358	0.362	11.28	0	3
AIM19	magenta	0.367	0.064	0.175	0.381	0.388	13.33	0	3
UBP6	magenta	0.366	0.073	0.2	0.382	0.391	14.62	0	2
YND1	magenta	0.37	0.062	0.167	0.383	0.386	15.22	0	2
FUS3	magenta	0.355	0.069	0.194	0.371	0.382	15.35	0	2
CTF18	magenta	0.361	0.075	0.208	0.378	0.393	16.18	0	2
YPL080C	magenta	0.35	0.059	0.169	0.359	0.362	12.98	0	2
EAF1	magenta	0.34	0.06	0.176	0.35	0.357	12.53	0	3
APA2	magenta	0.355	0.07	0.197	0.367	0.379	12.78	0	3
FRA2	magenta	0.326	0.062	0.191	0.333	0.341	8.05	0	3
GEM1	magenta	0.32	0.053	0.164	0.325	0.326	8.45	0	3
SMI1	magenta	0.373	0.062	0.167	0.386	0.394	13.67	0	3
YBR174C	magenta	0.311	0.051	0.164	0.316	0.319	5.89	0	3
MIG1	magenta	0.365	0.079	0.214	0.387	0.393	16.61	0	2
OSW5	magenta	0.368	0.065	0.176	0.383	0.388	16.3	0	2
TDA9	magenta	0.287	0.052	0.181	0.293	0.299	8.1	0	2
ATP4	magenta	0.344	0.061	0.179	0.353	0.361	12.38	0	2
THO2	magenta	0.336	0.057	0.17	0.346	0.35	10.96	0	2
RSM22	magenta	0.301	0.064	0.211	0.306	0.307	6.88	0	2
LDB19	magenta	0.343	0.061	0.178	0.35	0.349	10.95	0	2
YGL046W	magenta	0.367	0.068	0.185	0.382	0.389	16.73	0	2
QCR8	magenta	0.36	0.073	0.203	0.38	0.391	17.11	0	2
PAC10	magenta	0.355	0.081	0.228	0.376	0.386	17.09	0	2
GLN3	magenta	0.292	0.049	0.168	0.299	0.302	8.22	0	2
SCJ1	magenta	0.362	0.066	0.182	0.378	0.383	13.78	0	3
PET111	magenta	0.359	0.074	0.208	0.376	0.386	16.21	0	3
ARV1	magenta	0.351	0.054	0.154	0.358	0.363	11.2	0	3
SPS100	magenta	0.379	0.068	0.179	0.393	0.398	14.89	0	3
NHP10	magenta	0.362	0.068	0.186	0.377	0.389	17.16	0	2
RPA14	magenta	0.345	0.057	0.166	0.355	0.36	12.59	0	2
UTH1	magenta	0.344	0.056	0.164	0.358	0.365	14.55	0	2
ARG82	magenta	0.367	0.073	0.199	0.383	0.396	18.78	0	2
MRPL7	magenta	0.333	0.068	0.204	0.34	0.355	14.64	0	2
SLM6	magenta	0.253	0.042	0.167	0.257	0.263	5.86	0	2
RPS9B	magenta	0.271	0.051	0.19	0.275	0.278	6.64	0	2
YFL013W-A	magenta	0.367	0.064	0.175	0.38	0.389	15.16	0	3
DYN1	magenta	0.374	0.068	0.181	0.387	0.395	14.33	0	3
VPS3	magenta	0.282	0.063	0.225	0.288	0.296	11.42	0	3
YGR069W	magenta	0.376	0.064	0.17	0.388	0.397	13.8	0	3
ASM4	magenta	0.376	0.067	0.179	0.389	0.396	14.34	0	3
ISU2	magenta	0.318	0.052	0.164	0.325	0.329	7.08	0	3
COQ10	magenta	0.367	0.076	0.208	0.384	0.394	16.57	0	3
RIM13	magenta	0.358	0.067	0.186	0.37	0.381	13.51	0	3
DST1	magenta	0.34	0.06	0.177	0.349	0.356	10.19	0	3
LEA1	magenta	0.359	0.075	0.21	0.373	0.389	21.73	0	2
RPS7B	magenta	0.359	0.074	0.208	0.376	0.389	20.43	0	2
AAT2	magenta	0.265	0.049	0.185	0.268	0.269	5.07	0	2
HDA1	magenta	0.361	0.067	0.184	0.376	0.386	17.61	0	2
COQ5	magenta	0.277	0.051	0.186	0.282	0.286	7.87	0	2
RPS29B	magenta	0.311	0.06	0.193	0.318	0.32	8.91	0	2
IRC13	magenta	0.361	0.067	0.186	0.373	0.385	16.97	0	2
SLM3	magenta	0.33	0.051	0.155	0.337	0.342	10.17	0	2
SSN2	magenta	0.363	0.065	0.178	0.37	0.374	13.06	0	2
IES2	magenta	0.32	0.057	0.177	0.328	0.331	9.02	0	2
OPI11	magenta	0.231	0.041	0.176	0.234	0.233	4.44	0	2
RSB1	magenta	0.368	0.059	0.16	0.38	0.387	12.61	0	3
YLR407W	magenta	0.364	0.062	0.171	0.377	0.383	13.14	0	3
SSQ1	magenta	0.239	0.049	0.205	0.241	0.243	2.76	0	3
PRO1	magenta	0.314	0.063	0.199	0.319	0.325	7.18	0	3
GMC2	magenta	0.293	0.047	0.161	0.3	0.302	6.68	0	3
YLR374C	magenta	0.348	0.067	0.193	0.36	0.366	13.15	0	3
STE24	magenta	0.364	0.078	0.215	0.385	0.394	21.12	0	2
DOA4	magenta	0.351	0.073	0.209	0.366	0.381	19.75	0	2
PEP5	magenta	0.357	0.067	0.186	0.369	0.378	16.36	0	2
ARO2	magenta	0.275	0.059	0.215	0.28	0.287	6.3	0	2
GCV3	magenta	0.344	0.07	0.205	0.355	0.374	15.39	0	2
HDA2	magenta	0.323	0.051	0.158	0.33	0.332	8.36	0	2
RPL34A	magenta	0.35	0.064	0.183	0.364	0.376	13.95	0	3
YPR197C	magenta	0.373	0.067	0.179	0.388	0.389	14.47	0	3
FUN26	magenta	0.376	0.063	0.169	0.39	0.395	14.09	0	3
FKS1	magenta	0.35	0.067	0.19	0.366	0.376	18.08	0	2
MRPL51	magenta	0.331	0.069	0.209	0.341	0.355	12.96	0	2
YPT7	magenta	0.356	0.081	0.226	0.373	0.383	18.94	0	2
CYT1	magenta	0.348	0.072	0.208	0.367	0.376	18.73	0	2
YLR402W	magenta	0.321	0.059	0.184	0.33	0.336	12.03	0	2
VPS55	magenta	0.354	0.072	0.202	0.373	0.381	17.61	0	2
MIC27	magenta	0.361	0.079	0.218	0.38	0.393	19.84	0	2
VPS25	magenta	0.348	0.067	0.192	0.36	0.373	14.88	0	2
MTF1	magenta	0.328	0.06	0.183	0.333	0.336	9.12	0	2
PEX14	magenta	0.345	0.058	0.169	0.354	0.364	13.13	0	3
RAM1	magenta	0.345	0.067	0.194	0.356	0.367	13.82	0	2
SNF2	magenta	0.222	0.053	0.241	0.226	0.247	10.51	0	2
HOM6	magenta	0.341	0.082	0.241	0.354	0.372	17.44	0	2
COQ4	magenta	0.345	0.072	0.21	0.361	0.365	14.63	0	2
YPL205C	magenta	0.336	0.065	0.194	0.346	0.356	12.25	0	2
MDM20	magenta	0.252	0.058	0.231	0.26	0.274	14.84	0	2
ELP6	magenta	0.287	0.06	0.21	0.3	0.31	15.54	0	2
AEP2	magenta	0.348	0.064	0.182	0.36	0.375	16.41	0	2
VPS9	magenta	0.324	0.064	0.196	0.336	0.346	13.95	0	2
MMS22	magenta	0.289	0.069	0.238	0.3	0.324	19.24	0	2
COX15	magenta	0.336	0.073	0.216	0.352	0.368	16.86	0	2
CBS2	magenta	0.35	0.073	0.21	0.367	0.378	16.61	0	2
PHO88	magenta	0.342	0.062	0.183	0.354	0.357	14.02	0	2
SLA1	magenta	0.334	0.065	0.195	0.347	0.357	14.12	0	2
HPM1	magenta	0.331	0.068	0.205	0.34	0.358	19.34	0	2
MRPL9	magenta	0.324	0.066	0.203	0.334	0.351	22.69	0	2
SSZ1	magenta	0.278	0.06	0.217	0.284	0.29	8.75	0	2
CCM1	magenta	0.346	0.072	0.208	0.359	0.375	18.48	0	2
MGM101	magenta	0.34	0.067	0.196	0.351	0.364	14.46	0	2
BUD21	magenta	0.272	0.057	0.21	0.276	0.283	6.6	0	2
RVS167	magenta	0.346	0.079	0.228	0.371	0.388	27.2	0	2
NPL3	magenta	0.25	0.067	0.267	0.259	0.278	21.48	0	2
HEL2	magenta	0.355	0.081	0.227	0.367	0.385	22.01	0	2
CIK1	magenta	0.336	0.085	0.255	0.35	0.371	23.45	0	2
RSC2	magenta	0.346	0.073	0.211	0.36	0.365	15.05	0	2
OPI9	magenta	0.331	0.06	0.182	0.343	0.351	14.88	0	2
GEP4	magenta	0.295	0.101	0.342	0.315	0.367	38.52	0	2
THP1	magenta	0.251	0.064	0.253	0.257	0.271	11.46	0	2
MRPS8	magenta	0.304	0.08	0.262	0.319	0.335	19.07	0	2
PRO2	magenta	0.319	0.068	0.213	0.33	0.337	15.3	0	2
SHP1	magenta	0.304	0.067	0.22	0.312	0.323	13.97	0	2
RRP6	magenta	0.326	0.06	0.186	0.334	0.345	10.57	0	2
PEP12	magenta	0.276	0.068	0.246	0.284	0.292	12.5	0	2
RTR1	magenta	0.325	0.077	0.238	0.346	0.352	16.06	0	2
YCL062W	magenta	0.343	0.069	0.2	0.356	0.369	15.95	0	2
COQ3	magenta	0.341	0.085	0.251	0.362	0.379	21.77	0	2
PEX2	magenta	0.333	0.077	0.234	0.347	0.368	18.77	0	2
PET54	magenta	0.345	0.074	0.216	0.363	0.379	20.62	0	2
MON1	magenta	0.346	0.074	0.214	0.366	0.384	21.6	0	2
POC4	magenta	0.343	0.061	0.179	0.356	0.375	21.8	0	2
ABF2	magenta	0.34	0.064	0.189	0.351	0.36	14.38	0	2
YGL072C	magenta	0.317	0.068	0.213	0.33	0.344	18.5	0	2
BRP1	magenta	0.304	0.057	0.185	0.313	0.316	9.66	0	2
POP2	magenta	0.286	0.061	0.213	0.301	0.319	21.5	0	2
YLR235C	magenta	0.311	0.064	0.206	0.322	0.334	14.54	0	2
NUT1	magenta	0.342	0.068	0.199	0.358	0.372	21.15	0	2
STO1	magenta	0.307	0.064	0.208	0.316	0.325	12.67	0	2
COA3	magenta	0.337	0.086	0.256	0.358	0.378	24.8	0	2
SPE2	magenta	0.254	0.051	0.199	0.26	0.269	8.23	0	2
TGS1	magenta	0.324	0.065	0.2	0.334	0.344	13.77	0	2
PHO80	magenta	0.316	0.066	0.208	0.324	0.342	12.41	0	2
MRPL24	magenta	0.352	0.08	0.227	0.364	0.385	23.55	0	2
SHE9	magenta	0.324	0.072	0.221	0.335	0.344	14.18	0	2
SPE3	magenta	0.271	0.06	0.222	0.277	0.282	9.98	0	2
ELP4	magenta	0.328	0.065	0.198	0.34	0.349	12.48	0	2
PET100	magenta	0.34	0.064	0.188	0.35	0.358	16.55	0	2
MNE1	magenta	0.323	0.078	0.241	0.34	0.359	19.53	0	2
IES3	magenta	0.349	0.089	0.257	0.367	0.39	22.84	0	2
HUR1	magenta	0.305	0.054	0.175	0.316	0.321	11.7	0	2
CTK1	magenta	0.308	0.087	0.285	0.328	0.35	21.2	0	2
YTA7	magenta	0.334	0.075	0.226	0.348	0.365	19.02	0	2
COX19	magenta	0.353	0.082	0.23	0.374	0.384	22.1	0	2
MSS51	magenta	0.351	0.08	0.228	0.371	0.376	20.97	0	2
VPS64	magenta	0.334	0.065	0.193	0.345	0.357	13.29	0	2
HTD2	magenta	0.336	0.068	0.202	0.35	0.362	16.49	0	2
TRK1	magenta	0.338	0.089	0.265	0.371	0.388	29.73	0	2
SIN3	magenta	0.3	0.066	0.218	0.311	0.328	18.75	0	2
VMA3	magenta	0.206	0.061	0.298	0.213	0.229	12.7	0	2
LOC1	magenta	0.251	0.054	0.215	0.256	0.261	7.12	0	3
WSS1	magenta	0.347	0.069	0.199	0.358	0.371	14.66	0	3
COX5A	magenta	0.36	0.061	0.169	0.371	0.382	14.34	0	3
UBP3	magenta	0.303	0.042	0.14	0.306	0.306	5.6	0	3
MAP1	magenta	0.224	0.043	0.196	0.226	0.232	5.83	0	2
END3	magenta	0.284	0.043	0.153	0.287	0.289	5.09	0	3
MDL2	magenta	0.353	0.062	0.177	0.364	0.37	12.49	0	3
PUF6	magenta	0.359	0.063	0.177	0.371	0.376	13.82	0	3
YBR100W	magenta	0.35	0.068	0.194	0.362	0.373	12.27	0	3
RPN4	magenta	0.337	0.057	0.168	0.346	0.346	9.84	0	3
SLO1	magenta	0.367	0.067	0.184	0.381	0.389	13.81	0	3
RPE1	magenta	0.363	0.065	0.178	0.375	0.385	13.78	0	3
AIM29	magenta	0.342	0.061	0.178	0.353	0.358	11.25	0	3
HSC82	magenta	0.361	0.061	0.17	0.373	0.381	13.81	0	3
SAP4	magenta	0.361	0.07	0.195	0.379	0.386	16.43	0	3
DEP1	magenta	0.325	0.057	0.174	0.331	0.332	7.57	0	3
RPL29	magenta	0.36	0.056	0.156	0.369	0.375	13.2	0	3
IRC25	magenta	0.367	0.073	0.198	0.383	0.396	16.04	0	3
VPH1	magenta	0.356	0.068	0.192	0.37	0.38	13.29	0	3
HSL1	magenta	0.365	0.062	0.169	0.377	0.386	15.23	0	3
VPS65	magenta	0.31	0.055	0.177	0.316	0.319	7.48	0	3
SAC7	magenta	0.351	0.066	0.187	0.363	0.371	14.31	0	3
RPL23A	magenta	0.334	0.052	0.157	0.342	0.345	9.56	0	3
SST2	magenta	0.351	0.064	0.182	0.364	0.377	15.43	0	3
MRPL25	magenta	0.283	0.064	0.228	0.287	0.302	5.77	0	3
CCW12	magenta	0.282	0.053	0.189	0.286	0.287	4.87	0	3
OST5	magenta	0.372	0.066	0.178	0.387	0.393	15.83	0	3
CBP3	magenta	0.356	0.068	0.19	0.371	0.383	15.41	0	3
UNG1	magenta	0.359	0.062	0.174	0.372	0.374	14.25	0	3
YLR124W	magenta	0.366	0.071	0.195	0.383	0.388	16.69	0	3
APQ12	magenta	0.31	0.055	0.177	0.317	0.324	7.54	0	3
SLS1	magenta	0.309	0.06	0.195	0.314	0.319	7.02	0	3
SPT8	magenta	0.325	0.062	0.192	0.338	0.345	12.56	0	3
YML010C-B	magenta	0.33	0.054	0.162	0.339	0.344	10.08	0	3
MRS1	magenta	0.355	0.069	0.195	0.371	0.383	16.24	0	3
YGR039W	magenta	0.366	0.072	0.198	0.381	0.388	13.97	0	3
YKR051W	magenta	0.356	0.068	0.191	0.369	0.376	14.51	0	3
COX6	magenta	0.348	0.069	0.197	0.36	0.366	12.56	0	3
ATP14	magenta	0.371	0.065	0.175	0.385	0.388	15.83	0	3
ETT1	magenta	0.371	0.066	0.179	0.386	0.392	15.06	0	3
RIM1	magenta	0.241	0.053	0.221	0.243	0.253	4.69	0	3
ADA2	magenta	0.263	0.053	0.2	0.266	0.267	5.6	0	3
SET2	magenta	0.317	0.065	0.206	0.323	0.325	7.57	0	3
RPL35B	magenta	0.322	0.048	0.15	0.329	0.333	8.78	0	3
SGS1	magenta	0.356	0.065	0.182	0.369	0.384	14.63	0	3
CTF4	magenta	0.319	0.062	0.193	0.327	0.336	9.2	0	3
BUD26	magenta	0.328	0.054	0.166	0.336	0.343	9.86	0	3
WAR1	magenta	0.361	0.065	0.179	0.375	0.385	15	0	3
NAT3	magenta	0.279	0.051	0.183	0.284	0.294	6.66	0	3
MDM31	magenta	0.359	0.071	0.196	0.374	0.388	15.9	0	3
BUD27	magenta	0.282	0.04	0.141	0.288	0.291	5.9	0	3
COR1	magenta	0.357	0.068	0.19	0.372	0.38	15.38	0	3
TOP3	magenta	0.348	0.061	0.175	0.36	0.368	14.24	0	3
PBY1	magenta	0.345	0.065	0.188	0.358	0.367	13.56	0	3
SSF1	magenta	0.342	0.057	0.167	0.352	0.356	10.83	0	3
TRM9	magenta	0.338	0.061	0.179	0.35	0.355	10.4	0	3
PEP8	magenta	0.353	0.059	0.168	0.365	0.368	13.6	0	3
SWM2	magenta	0.349	0.065	0.185	0.36	0.367	12.94	0	3
GCN1	magenta	0.375	0.065	0.173	0.387	0.398	16.52	0	3
YMR242W-A	magenta	0.304	0.058	0.191	0.309	0.317	8.02	0	3
SAC1	magenta	0.314	0.045	0.144	0.318	0.319	7.99	0	3
EXO1	magenta	0.374	0.071	0.19	0.392	0.397	17.25	0	3
ELO3	magenta	0.339	0.056	0.166	0.348	0.356	13.2	0	3
ERF2	magenta	0.345	0.059	0.171	0.355	0.366	12.29	0	3
RPL24A	magenta	0.334	0.053	0.158	0.343	0.347	11.5	0	3
BUD19	magenta	0.229	0.037	0.16	0.232	0.232	3.74	0	3
CEM1	magenta	0.334	0.063	0.19	0.343	0.352	10.99	0	3
PRE9	magenta	0.325	0.064	0.198	0.334	0.363	14.83	0	3
DFG16	magenta	0.366	0.071	0.194	0.382	0.393	17.85	0	3
RPL40B	magenta	0.366	0.067	0.183	0.382	0.386	15.52	0	3
ESC2	magenta	0.347	0.067	0.193	0.358	0.371	14.35	0	3
ERV46	magenta	0.367	0.066	0.18	0.381	0.387	17.64	0	3
TRS65	magenta	0.361	0.071	0.198	0.375	0.386	16.83	0	3
GIS4	magenta	0.369	0.077	0.21	0.387	0.392	18.25	0	3
CBT1	magenta	0.36	0.075	0.209	0.379	0.39	17.9	0	3
EOS1	magenta	0.271	0.063	0.232	0.276	0.284	6.57	0	3
RBS1	magenta	0.359	0.073	0.202	0.378	0.389	18.87	0	3
NDE1	magenta	0.333	0.057	0.172	0.343	0.348	12.57	0	3
PKR1	magenta	0.314	0.049	0.156	0.321	0.324	8	0	3
MDM12	magenta	0.29	0.083	0.288	0.294	0.315	11.46	0	3
XRN1	magenta	0.309	0.054	0.176	0.317	0.318	10.38	0	3
VPS54	magenta	0.341	0.061	0.181	0.351	0.36	12.12	0	3
YDR203W	magenta	0.34	0.061	0.179	0.351	0.355	12.37	0	3
RPL27B	magenta	0.334	0.055	0.165	0.344	0.352	12.08	0	3
URM1	magenta	0.324	0.052	0.162	0.333	0.334	10.22	0	3
COX10	magenta	0.354	0.071	0.201	0.371	0.383	16.24	0	3
SKI8	magenta	0.349	0.063	0.18	0.36	0.366	14.12	0	3
DOC1	magenta	0.219	0.039	0.18	0.221	0.226	4.37	0	3
RLM1	magenta	0.357	0.063	0.178	0.371	0.376	15	0	3
GPP1	magenta	0.27	0.054	0.201	0.274	0.277	8.1	0	3
POS5	magenta	0.315	0.062	0.196	0.322	0.328	8.3	0	3
BUD16	magenta	0.3	0.058	0.193	0.308	0.319	11.1	0	3
RNR1	magenta	0.236	0.048	0.205	0.241	0.247	6.48	0	3
FPS1	magenta	0.332	0.066	0.199	0.344	0.358	12.59	0	3
SUS1	magenta	0.354	0.079	0.224	0.372	0.391	22.42	0	3
YBL100C	magenta	0.352	0.085	0.241	0.376	0.388	20.4	0	3
CCZ1	magenta	0.362	0.074	0.205	0.382	0.395	19.71	0	3
RAD51	magenta	0.324	0.061	0.189	0.336	0.346	14.22	0	3
SKY1	magenta	0.305	0.058	0.189	0.312	0.314	7.65	0	3
AAH1	magenta	0.263	0.057	0.218	0.267	0.269	6.9	0	3
IFM1	magenta	0.349	0.079	0.226	0.363	0.37	14.76	0	3
SNT309	magenta	0.279	0.054	0.195	0.285	0.294	8.6	0	3
MET7	magenta	0.302	0.056	0.185	0.307	0.313	7.71	0	3
RPS16A	magenta	0.299	0.058	0.193	0.306	0.318	11.38	0	3
PET117	magenta	0.354	0.075	0.213	0.371	0.382	17.23	0	3
CDC50	magenta	0.33	0.059	0.179	0.339	0.341	11.39	0	3
NGG1	magenta	0.255	0.049	0.19	0.259	0.263	5.97	0	3
YGL007C-A	magenta	0.352	0.07	0.198	0.366	0.376	17.07	0	3
ICE2	magenta	0.358	0.078	0.217	0.379	0.399	23.72	0	3
NKP2	magenta	0.35	0.063	0.18	0.365	0.373	15.85	0	3
PMA2	magenta	0.355	0.069	0.196	0.373	0.379	16.82	0	3
COA2	magenta	0.348	0.072	0.208	0.363	0.371	14.03	0	3
COX18	magenta	0.349	0.071	0.204	0.366	0.373	16.81	0	3
ARC18	magenta	0.323	0.056	0.173	0.334	0.339	10.79	0	3
PHO86	magenta	0.325	0.059	0.182	0.333	0.341	11.54	0	3
PHO23	magenta	0.324	0.064	0.198	0.335	0.343	12.18	0	3
UPF3	magenta	0.328	0.06	0.183	0.337	0.345	11.93	0	3
VPS5	magenta	0.335	0.081	0.242	0.347	0.382	27.42	0	3
COX23	magenta	0.351	0.078	0.222	0.371	0.38	18.57	0	3
COX20	magenta	0.32	0.074	0.23	0.328	0.34	11.88	0	3
ADO1	magenta	0.309	0.053	0.172	0.315	0.317	10.12	0	3
YML090W	magenta	0.343	0.071	0.207	0.352	0.378	17.42	0	3
KRE28	magenta	0.252	0.068	0.268	0.261	0.278	17.8	0	3
NUP84	magenta	0.29	0.06	0.207	0.299	0.317	15.35	0	3
SPT21	magenta	0.296	0.048	0.161	0.303	0.308	9.19	0	3
ATP1	magenta	0.321	0.07	0.217	0.334	0.343	16.25	0	3
ARD1	magenta	0.329	0.067	0.205	0.34	0.351	17.49	0	3
BUD31	magenta	0.306	0.049	0.159	0.31	0.315	8.92	0	3
SIC1	magenta	0.306	0.08	0.262	0.321	0.335	22.77	0	3
BIM1	magenta	0.306	0.082	0.269	0.32	0.344	23.04	0	3
RPL43B	magenta	0.277	0.049	0.177	0.284	0.287	10.67	0	3
MIC19	magenta	0.326	0.072	0.221	0.346	0.365	23.87	0	3
YLR363W-A	magenta	0.342	0.063	0.185	0.354	0.369	18.27	0	3
SIF2	magenta	0.319	0.064	0.201	0.331	0.347	17.54	0	3
YLR264C-A	magenta	0.311	0.052	0.166	0.321	0.324	12.71	0	3
DUN1	magenta	0.336	0.071	0.211	0.351	0.37	17.7	0	3
EGD2	magenta	0.339	0.095	0.28	0.369	0.39	29.17	0	3
ALT1	magenta	0.3	0.086	0.286	0.315	0.354	28.87	0	3
TIM11	magenta	0.296	0.098	0.33	0.296	0.391	51.89	0	3
CSF1	magenta	0.289	0.072	0.249	0.299	0.313	15.16	0	3
COX11	magenta	0.328	0.072	0.219	0.346	0.356	18.32	0	3
EAP1	magenta	0.283	0.074	0.262	0.294	0.333	35.84	0	3
EMI1	magenta	0.319	0.084	0.264	0.342	0.367	31.1	0	3
BCS1	magenta	0.353	0.078	0.219	0.373	0.386	23.55	0	3
RAD52	magenta	0.32	0.062	0.195	0.331	0.343	14.52	0	3
MDM38	magenta	0.338	0.084	0.248	0.367	0.384	29.24	0	3
FMC1	magenta	0.313	0.061	0.195	0.324	0.33	11.83	0	3
COX7	magenta	0.332	0.074	0.223	0.352	0.367	22.25	0	3
GIM3	magenta	0.332	0.076	0.23	0.35	0.373	23.39	0	3
PEX8	magenta	0.313	0.063	0.202	0.326	0.34	15.9	0	3
PET122	magenta	0.347	0.072	0.208	0.364	0.377	17.74	0	3
SGF29	magenta	0.338	0.06	0.179	0.351	0.359	13.47	0	3
RAD50	magenta	0.305	0.064	0.21	0.315	0.328	15.79	0	3
YPL062W	magenta	0.275	0.048	0.173	0.283	0.29	9.77	0	3
LDB18	magenta	0.323	0.059	0.182	0.335	0.343	12.03	0	3
CDH1	magenta	0.316	0.072	0.227	0.336	0.354	25.42	0	3
TEF4	magenta	0.321	0.057	0.178	0.332	0.335	12.73	0	3
KTI12	magenta	0.332	0.06	0.181	0.343	0.35	13.09	0	3
TOM1	magenta	0.313	0.055	0.175	0.321	0.328	10.6	0	3
MMR1	magenta	0.311	0.093	0.3	0.339	0.373	34.38	0	3
RMI1	magenta	0.338	0.079	0.235	0.355	0.378	22.89	0	3
THP3	magenta	0.297	0.055	0.185	0.306	0.309	8.97	0	3
MOG1	magenta	0.298	0.062	0.209	0.314	0.326	20.46	0	3
NUP120	magenta	0.294	0.059	0.202	0.305	0.316	15.75	0	3
LSM6	magenta	0.325	0.053	0.164	0.332	0.333	10.4	0	3
PUB1	magenta	0.345	0.082	0.237	0.37	0.383	23.87	0	3
CRD1	magenta	0.315	0.061	0.193	0.325	0.327	11.83	0	3
MSC1	magenta	0.348	0.083	0.24	0.371	0.39	25.32	0	3
VID22	magenta	0.347	0.068	0.198	0.362	0.371	14.93	0	3
COX9	magenta	0.336	0.077	0.23	0.356	0.368	22.13	0	3
CBP6	magenta	0.349	0.075	0.216	0.369	0.383	20.86	0	3
URE2	magenta	0.281	0.071	0.255	0.289	0.305	16.88	0	3
YNL171C	magenta	0.277	0.06	0.216	0.288	0.301	14.83	0	3
BUB3	magenta	0.324	0.066	0.204	0.337	0.354	19.32	0	3
VAM7	magenta	0.325	0.058	0.179	0.336	0.339	15.72	0	3
YPL102C	magenta	0.314	0.054	0.171	0.322	0.326	9.42	0	3
MED1	magenta	0.29	0.06	0.207	0.3	0.311	13.62	0	3
RIM101	magenta	0.331	0.089	0.268	0.36	0.373	25.49	0	3
DID4	magenta	0.342	0.07	0.206	0.357	0.367	15.61	0	3
CBP1	magenta	0.339	0.071	0.211	0.356	0.364	16.86	0	3
SAC3	magenta	0.288	0.059	0.204	0.295	0.306	9.87	0	3
TPN1	magenta	0.311	0.076	0.244	0.324	0.344	18.43	0	3
POR1	magenta	0.312	0.092	0.295	0.34	0.367	30.9	0	3
IKI3	magenta	0.305	0.067	0.219	0.316	0.328	14.82	0	3
HTZ1	magenta	0.323	0.074	0.229	0.339	0.351	17.51	0	3
VMA13	magenta	0.272	0.071	0.261	0.292	0.311	25.09	0	3
NBP2	magenta	0.308	0.066	0.214	0.322	0.337	16.64	0	3
MRE11	magenta	0.326	0.069	0.212	0.341	0.356	18.32	0	3
IXR1	magenta	0.335	0.068	0.204	0.35	0.356	15.23	0	3
CPR7	magenta	0.29	0.057	0.195	0.297	0.299	12.01	0	3
MOT2	magenta	0.202	0.054	0.266	0.202	0.196	1.42	1.26	3
YEL045C	magenta	0.186	0.052	0.279	0.185	0.182	1.61	1.27	3
RPL35A	magenta	0.203	0.054	0.268	0.202	0.196	2.57	0.5	3
ATP15	magenta	0.197	0.054	0.272	0.197	0.198	1.94	1.52	3
RTG2	magenta	0.201	0.055	0.272	0.203	0.209	3.96	0	3
MKS1	magenta	0.197	0.053	0.272	0.2	0.204	4.79	0	2
IDH2	magenta	0.2	0.05	0.248	0.204	0.208	6.52	0	2
IDH1	magenta	0.201	0.049	0.243	0.202	0.201	3.68	0	3
PAN2	red	0.389	0.06	0.153	0.399	0.403	8.8	0	3
BMT5	red	0.388	0.063	0.163	0.398	0.403	8.88	0	3
MNR2	red	0.385	0.063	0.165	0.396	0.398	8.57	0	3
MSN5	red	0.406	0.066	0.162	0.416	0.417	8.25	0	3
HOF1	red	0.392	0.045	0.115	0.396	0.404	5.77	0	2
STE5	red	0.383	0.06	0.157	0.392	0.393	7.64	0	3
SNF11	red	0.395	0.059	0.149	0.404	0.402	8.62	0	3
UBP8	red	0.398	0.073	0.184	0.404	0.404	6.59	0	2
YBR063C	red	0.406	0.071	0.173	0.413	0.427	7.71	0	2
SAP155	red	0.393	0.056	0.142	0.398	0.398	8.13	0	3
YDR509W	red	0.393	0.064	0.163	0.401	0.406	6.13	0	3
RGI2	red	0.391	0.054	0.138	0.401	0.409	7.55	0	2
STE11	red	0.399	0.061	0.152	0.409	0.413	7.98	0	3
AAT1	red	0.4	0.059	0.148	0.407	0.407	7.72	0	3
RTS1	red	0.375	0.048	0.127	0.381	0.387	5.29	0	2
CRC1	red	0.397	0.056	0.142	0.404	0.403	7.28	0	3
MMS2	red	0.39	0.06	0.153	0.4	0.401	8.3	0	3
VMS1	red	0.407	0.064	0.157	0.412	0.407	5.48	0	2
MRC1	red	0.396	0.062	0.157	0.4	0.401	1.88	0	2
PIF1	red	0.407	0.07	0.172	0.414	0.416	5.27	0	2
YOR376W-A	red	0.395	0.064	0.161	0.404	0.411	7.39	0	3
SNF1	red	0.394	0.06	0.151	0.401	0.408	6.51	0	3
CBC2	red	0.404	0.058	0.143	0.409	0.41	6.99	0	3
NPR1	red	0.395	0.056	0.142	0.402	0.406	7.07	0	3
YPR153W	red	0.395	0.065	0.164	0.402	0.406	5.81	0	3
OCA1	red	0.403	0.051	0.127	0.408	0.409	4.76	0	3
TMA19	red	0.402	0.057	0.142	0.409	0.414	5.53	0	3
YAR044W	red	0.394	0.067	0.171	0.403	0.4	5.37	0	3
FUN30	red	0.398	0.062	0.155	0.407	0.411	7.42	0	3
SRV2	red	0.4	0.051	0.128	0.404	0.4	5.92	0	3
SNF3	red	0.399	0.063	0.158	0.407	0.408	5.11	0	3
MLH1	red	0.4	0.054	0.135	0.403	0.407	4.87	0.18	3
YKE4	red	0.399	0.058	0.146	0.406	0.411	6.82	0	3
TIF2	red	0.407	0.058	0.143	0.414	0.418	6	0	3
YLL020C	red	0.399	0.061	0.153	0.407	0.413	4.78	0	3
MAD3	red	0.391	0.06	0.154	0.398	0.399	5.54	0	3
SHE1	red	0.392	0.064	0.163	0.4	0.402	5.41	0	3
MTC3	red	0.385	0.061	0.159	0.392	0.398	5.68	0	3
EUG1	red	0.404	0.062	0.154	0.412	0.415	5.68	0	3
YKL023W	red	0.393	0.052	0.133	0.4	0.401	4.67	0	3
NIF3	red	0.411	0.06	0.146	0.417	0.415	4.59	0	3
APJ1	red	0.404	0.055	0.137	0.408	0.403	3.29	0	3
ITC1	red	0.403	0.053	0.131	0.406	0.407	2.67	0.27	3
HXK2	red	0.389	0.058	0.15	0.395	0.398	5.11	0	3
PDB1	red	0.388	0.057	0.146	0.391	0.393	3.13	0.5	3
ELF1	red	0.399	0.057	0.143	0.405	0.409	3.68	0	3
ATG1	red	0.398	0.054	0.135	0.402	0.402	5.03	0	3
COA1	red	0.392	0.045	0.115	0.396	0.397	3.96	0	3
MPD2	grey	0.391	0.064	0.165	0.403	0.416	11.49	0	3
TIF3	grey	0.391	0.07	0.18	0.406	0.413	11.24	0	3
TEC1	grey	0.385	0.068	0.175	0.399	0.405	11.2	0	2
YBR224W	grey	0.394	0.061	0.154	0.404	0.41	10.64	0	2
YDL186W	grey	0.382	0.071	0.185	0.387	0.383	6.29	0.23	2
PPT2	grey	0.38	0.063	0.165	0.392	0.397	10.67	0	3
TYW3	grey	0.391	0.063	0.162	0.402	0.406	11	0	3
PUF3	grey	0.378	0.059	0.158	0.39	0.397	10.72	0	2
MSH5	grey	0.39	0.074	0.192	0.402	0.404	12.01	0	2
VHS3	grey	0.387	0.073	0.19	0.401	0.406	11	0	2
QCR9	grey	0.38	0.07	0.184	0.391	0.399	11.28	0	3
SIP5	grey	0.384	0.059	0.155	0.394	0.395	11.07	0	3
CRZ1	grey	0.39	0.069	0.178	0.402	0.401	10.9	0	3
SIR2	grey	0.39	0.069	0.178	0.401	0.404	10.99	0	3
PEX19	grey	0.38	0.069	0.181	0.391	0.396	9.08	0	3
OM45	grey	0.392	0.064	0.164	0.404	0.406	11.31	0	3
ADR1	grey	0.381	0.061	0.16	0.392	0.395	10.59	0	2
PAF1	grey	0.389	0.058	0.15	0.397	0.408	11.66	0	2
NAS6	grey	0.388	0.067	0.173	0.402	0.408	11.1	0	3
IDS2	grey	0.386	0.062	0.161	0.397	0.404	11.13	0	3
APC9	grey	0.385	0.059	0.154	0.396	0.401	9.99	0	3
YLH47	grey	0.392	0.06	0.152	0.402	0.407	11.22	0	3
YMR074C	grey	0.383	0.064	0.168	0.393	0.397	10.48	0	3
VTC1	grey	0.388	0.059	0.153	0.398	0.403	11.09	0	3
ASK10	grey	0.375	0.067	0.177	0.388	0.4	11.72	0	2
RVS161	grey	0.388	0.059	0.152	0.399	0.397	10.73	0	2
CHS5	grey	0.396	0.07	0.175	0.408	0.416	10.78	0	2
YBP1	grey	0.399	0.068	0.17	0.409	0.414	11.57	0	2
PAC1	grey	0.401	0.067	0.168	0.412	0.416	11.26	0	3
GOS1	grey	0.388	0.067	0.172	0.398	0.409	10.37	0	3
SPO23	grey	0.381	0.058	0.153	0.391	0.396	10.03	0	3
PPT1	grey	0.381	0.061	0.159	0.392	0.396	10.33	0	3
ALP1	grey	0.38	0.057	0.151	0.39	0.396	10.77	0	3
BMH1	grey	0.392	0.062	0.158	0.402	0.407	12.09	0	3
PRY3	grey	0.383	0.061	0.161	0.395	0.405	10.86	0	2
ATG8	grey	0.381	0.068	0.18	0.392	0.397	10.2	0	3
YPL261C	grey	0.384	0.068	0.177	0.396	0.402	11.12	0	3
SET6	grey	0.397	0.068	0.172	0.411	0.416	11.49	0	3
NEW1	grey	0.386	0.07	0.18	0.398	0.401	11.29	0	2
INP52	grey	0.382	0.069	0.18	0.397	0.402	13.47	0	3
RPL38	grey	0.391	0.063	0.162	0.402	0.408	11.23	0	3
STB3	grey	0.384	0.065	0.17	0.395	0.399	11.01	0	2
TUL1	grey	0.387	0.065	0.168	0.398	0.403	11.36	0	3
HAA1	grey	0.385	0.063	0.163	0.396	0.399	11.29	0	3
YIL092W	grey	0.376	0.062	0.167	0.389	0.392	9.81	0	2
PRM8	grey	0.388	0.066	0.169	0.4	0.404	11.31	0	3
YGR066C	grey	0.387	0.063	0.162	0.397	0.4	11.21	0	3
GAC1	grey	0.39	0.061	0.158	0.399	0.401	11.16	0	3
PFK2	grey	0.38	0.061	0.161	0.391	0.398	10.52	0	3
PAT1	grey	0.385	0.061	0.158	0.395	0.4	10.35	0	3
YDR426C	grey	0.377	0.069	0.184	0.389	0.399	11.27	0	3
PIG2	grey	0.39	0.066	0.169	0.401	0.411	12.29	0	3
CSR1	grey	0.383	0.063	0.163	0.394	0.401	11.08	0	3
ARO8	grey	0.387	0.065	0.168	0.397	0.402	10.4	0	3
ERP3	grey	0.382	0.066	0.173	0.394	0.395	11.07	0	2
TDH2	grey	0.379	0.058	0.153	0.389	0.392	10.66	0	2
RPL21B	grey	0.381	0.053	0.138	0.388	0.397	10.29	0	2
YHR140W	grey	0.382	0.061	0.16	0.393	0.397	10.25	0	3
EST1	grey	0.385	0.065	0.17	0.395	0.4	11.02	0	3
STE13	grey	0.381	0.064	0.167	0.393	0.399	11.41	0	3
NUM1	grey	0.397	0.07	0.176	0.407	0.412	11.77	0	2
INP1	grey	0.395	0.064	0.162	0.406	0.416	10.71	0	3
GPB1	grey	0.38	0.057	0.15	0.391	0.396	10	0	2
YJL067W	grey	0.39	0.063	0.162	0.401	0.406	10.49	0	3
GYP1	grey	0.387	0.067	0.173	0.399	0.4	11.91	0	2
FPR2	grey	0.385	0.06	0.156	0.394	0.399	11.4	0	3
SAP1	grey	0.395	0.067	0.17	0.407	0.41	11.76	0	3
RGP1	grey	0.38	0.069	0.182	0.392	0.4	11.3	0	3
TKL1	grey	0.394	0.062	0.158	0.405	0.413	11.71	0	3
CPT1	grey	0.382	0.07	0.182	0.396	0.399	11.53	0	3
RRF1	grey	0.386	0.068	0.176	0.397	0.404	11.69	0	3
YHR127W	grey	0.388	0.063	0.162	0.4	0.404	11.48	0	3
ADE3	grey	0.392	0.071	0.18	0.403	0.407	12.1	0	3
MXR2	grey	0.388	0.064	0.164	0.401	0.408	11.96	0	3
YBR134W	grey	0.376	0.059	0.158	0.387	0.396	12.2	0	2
YDL027C	grey	0.386	0.064	0.167	0.399	0.409	10.66	0	3
RPN14	grey	0.381	0.064	0.167	0.393	0.402	9.69	0	3
YCR022C	grey	0.381	0.065	0.171	0.392	0.396	11.17	0	3
OTU2	grey	0.394	0.066	0.168	0.406	0.416	11.9	0	3
SDS3	grey	0.374	0.062	0.166	0.386	0.391	11.22	0	3
RAD4	grey	0.39	0.066	0.17	0.398	0.402	9.91	0	2
AIM23	grey	0.385	0.066	0.171	0.394	0.397	12.15	0	2
GRR1	grey	0.389	0.065	0.168	0.4	0.41	11.8	0	3
LCL1	grey	0.388	0.065	0.169	0.399	0.405	11.95	0	3
ROM2	grey	0.397	0.065	0.164	0.407	0.414	10.65	0	3
LCB3	grey	0.385	0.065	0.17	0.397	0.399	11.32	0	3
YMR147W	grey	0.396	0.072	0.183	0.41	0.417	11.92	0	3
YGL024W	grey	0.394	0.067	0.169	0.403	0.408	10.09	0	3
SCM4	grey	0.387	0.065	0.168	0.399	0.404	11.62	0	3
YLR108C	grey	0.388	0.062	0.16	0.399	0.399	9.87	0	2
THO1	grey	0.39	0.059	0.152	0.4	0.404	10.18	0	3
YOR277C	grey	0.399	0.063	0.158	0.41	0.414	10.43	0	2
SUR1	grey	0.38	0.065	0.17	0.393	0.402	12.58	0	3
APM1	grey	0.387	0.063	0.164	0.4	0.406	12.24	0	3
PTC6	grey	0.379	0.065	0.172	0.393	0.403	11.55	0	3
AYR1	grey	0.387	0.063	0.163	0.4	0.407	11.98	0	2
RNR3	grey	0.39	0.064	0.163	0.404	0.412	12.35	0	3
DUG3	grey	0.391	0.063	0.161	0.403	0.406	12.02	0	3
RCN2	grey	0.378	0.065	0.173	0.387	0.4	9	0	3
SNX4	grey	0.388	0.064	0.164	0.4	0.399	11.7	0	3
AAD4	grey	0.39	0.067	0.171	0.403	0.405	12.04	0	3
FUS1	grey	0.384	0.066	0.173	0.396	0.401	11.91	0	3
YOR225W	grey	0.385	0.064	0.166	0.396	0.4	10.2	0	3
UBC13	grey	0.392	0.063	0.16	0.403	0.408	10.38	0	3
CIN5	grey	0.384	0.064	0.166	0.396	0.398	11.97	0	2
YOR364W	grey	0.395	0.068	0.173	0.408	0.414	12.19	0	3
CMC1	grey	0.386	0.07	0.182	0.398	0.405	11.54	0	3
RPL8A	grey	0.385	0.047	0.122	0.393	0.399	12.98	0	3
YIA6	grey	0.373	0.068	0.181	0.388	0.395	11.4	0	2
PUT3	grey	0.383	0.061	0.159	0.393	0.398	9.7	0	3
MEP2	grey	0.383	0.064	0.167	0.397	0.403	12.16	0	2
RXT3	grey	0.396	0.062	0.158	0.404	0.41	10.12	0	3
RPL1B	grey	0.403	0.057	0.142	0.41	0.409	8.82	0	3
TGL5	grey	0.386	0.058	0.15	0.396	0.401	9.82	0	3
YPR092W	grey	0.394	0.065	0.164	0.406	0.416	12.33	0	3
HIR2	grey	0.377	0.062	0.163	0.389	0.398	11.98	0	3
STM1	grey	0.375	0.071	0.188	0.39	0.397	11.74	0	3
RPL39	grey	0.4	0.07	0.175	0.414	0.419	12.26	0	3
YGL081W	grey	0.389	0.067	0.173	0.402	0.411	12	0	3
ZRC1	grey	0.382	0.059	0.154	0.392	0.399	9.88	0	3
FCY22	grey	0.399	0.073	0.183	0.411	0.423	14.5	0	2
DCS2	grey	0.382	0.064	0.168	0.395	0.403	10.03	0	3
TMA23	grey	0.383	0.059	0.155	0.393	0.397	8.5	0	2
OMS1	grey	0.383	0.065	0.171	0.395	0.398	9.56	0	3
RAD18	grey	0.379	0.067	0.176	0.391	0.404	11.6	0	3
TIS11	grey	0.388	0.06	0.154	0.398	0.401	9.72	0	3
DBF20	grey	0.385	0.064	0.167	0.396	0.401	11.88	0	3
MTC5	grey	0.382	0.058	0.151	0.391	0.399	8.55	0	2
SSE2	grey	0.384	0.06	0.158	0.395	0.395	8.72	0	2
YGL082W	grey	0.393	0.061	0.156	0.405	0.408	10.25	0	3
VAM10	grey	0.387	0.065	0.166	0.399	0.412	13.48	0	2
HFI1	grey	0.384	0.067	0.175	0.397	0.406	12.1	0	3
MAL33	grey	0.384	0.06	0.155	0.394	0.401	9.29	0	3
YLR416C	grey	0.4	0.061	0.154	0.41	0.42	9.75	0	2
RCK2	grey	0.389	0.062	0.159	0.399	0.408	10.07	0	3
MSN1	grey	0.399	0.064	0.16	0.41	0.412	9.47	0	3
YAK1	grey	0.382	0.064	0.167	0.394	0.397	11.46	0	3
SNN1	grey	0.371	0.058	0.157	0.381	0.385	10.48	0	3
GDI1	grey	0.402	0.067	0.166	0.411	0.414	8.39	0	3
YLR422W	grey	0.392	0.066	0.168	0.403	0.408	9.98	0	3
CBF1	grey	0.383	0.068	0.176	0.393	0.402	12.82	0	2
TRS85	grey	0.387	0.064	0.165	0.397	0.398	9.25	0	3
SWC7	grey	0.388	0.058	0.151	0.398	0.408	9.58	0	3
STE4	grey	0.393	0.063	0.16	0.403	0.409	10.01	0	3
POG1	grey	0.386	0.063	0.164	0.395	0.396	8.5	0	3
YDL026W	grey	0.395	0.066	0.167	0.407	0.41	12.46	0	3
VPS70	grey	0.383	0.056	0.146	0.391	0.403	11.32	0	2
APA1	grey	0.384	0.065	0.169	0.396	0.4	12.29	0	3
PAN3	grey	0.391	0.067	0.172	0.405	0.412	13.38	0	3
YLR269C	grey	0.404	0.064	0.159	0.415	0.418	9.86	0	3
CWH41	grey	0.382	0.057	0.15	0.39	0.401	9.55	0	2
STE7	grey	0.388	0.075	0.194	0.404	0.411	14.18	0	2
PDE2	grey	0.372	0.048	0.129	0.38	0.385	6.55	0	2
SOD1	grey	0.37	0.067	0.179	0.382	0.399	12.04	0	2
YDL121C	grey	0.381	0.069	0.18	0.395	0.405	12.62	0	3
YNR029C	grey	0.388	0.056	0.143	0.395	0.398	9.15	0	3
YJL150W	grey	0.386	0.061	0.158	0.397	0.401	9.54	0	3
YBR071W	grey	0.381	0.067	0.177	0.393	0.399	12.07	0	3
MRP2	grey	0.389	0.074	0.191	0.403	0.416	14.98	0	3
DIG2	grey	0.397	0.07	0.175	0.411	0.418	13.86	0	2
AGP1	grey	0.389	0.065	0.166	0.4	0.401	8.82	0	3
UBR2	grey	0.401	0.06	0.149	0.409	0.411	8.71	0	3
YDL114W	grey	0.381	0.071	0.187	0.397	0.402	13.64	0	3
RPS21B	grey	0.385	0.052	0.136	0.392	0.395	8.94	0	3
WSC2	grey	0.389	0.06	0.155	0.399	0.403	9.15	0	3
BSC2	grey	0.394	0.062	0.158	0.405	0.407	9.82	0	3
YNL134C	grey	0.383	0.066	0.171	0.397	0.402	13.78	0	3
CAD1	grey	0.388	0.06	0.154	0.399	0.402	8.75	0	3
FAR10	grey	0.391	0.056	0.144	0.4	0.401	9.03	0	3
CDC73	grey	0.383	0.072	0.187	0.395	0.403	12.59	0	2
AFI1	grey	0.383	0.059	0.155	0.393	0.4	9.44	0	3
ORM2	grey	0.385	0.063	0.163	0.398	0.407	12.58	0	3
YNL144C	grey	0.385	0.072	0.189	0.4	0.4	13.52	0	2
CTH1	grey	0.385	0.067	0.174	0.399	0.407	12.39	0	3
COX5B	grey	0.388	0.066	0.171	0.402	0.407	13.15	0	3
TDA7	grey	0.384	0.064	0.165	0.396	0.403	12.42	0	3
MRPL31	grey	0.397	0.062	0.158	0.407	0.407	9.13	0	2
STE23	grey	0.397	0.071	0.18	0.411	0.415	12.85	0	3
AIM20	grey	0.391	0.068	0.174	0.406	0.411	12.66	0	3
LTE1	grey	0.38	0.065	0.171	0.392	0.399	12.82	0	2
MMS1	grey	0.398	0.075	0.189	0.405	0.414	9.58	0	2
NDE2	grey	0.387	0.069	0.177	0.401	0.407	13.3	0	2
YHR050W-A	grey	0.396	0.066	0.167	0.405	0.408	9.38	0	3
PUN1	grey	0.384	0.058	0.152	0.393	0.396	7.33	0	2
RDI1	grey	0.38	0.065	0.17	0.393	0.403	13.48	0	3
ERI1	grey	0.387	0.068	0.176	0.402	0.409	12.77	0	2
LHP1	grey	0.385	0.068	0.175	0.399	0.402	13.11	0	2
ZIP1	grey	0.384	0.071	0.185	0.4	0.405	14.46	0	2
DCR2	grey	0.379	0.069	0.182	0.393	0.399	12.29	0	3
REV7	grey	0.376	0.068	0.182	0.391	0.397	13.34	0	3
SAK1	grey	0.385	0.065	0.168	0.398	0.407	13.08	0	3
RPB4	grey	0.385	0.06	0.158	0.394	0.394	8.56	0	2
PMC1	grey	0.389	0.065	0.167	0.398	0.407	9.17	0	2
YGR122W	grey	0.383	0.07	0.182	0.397	0.402	12.52	0	3
TPK2	grey	0.381	0.062	0.163	0.392	0.401	8.97	0	3
GPB2	grey	0.384	0.057	0.148	0.394	0.402	9.42	0	3
ADY2	grey	0.375	0.07	0.187	0.391	0.398	14.28	0	3
YPR039W	grey	0.395	0.063	0.161	0.405	0.41	9.09	0	3
YDR455C	grey	0.378	0.054	0.144	0.385	0.397	8.18	0	2
MET13	grey	0.379	0.069	0.181	0.393	0.403	13.71	0	2
GRX4	grey	0.404	0.058	0.142	0.41	0.409	8.59	0	2
SLC1	grey	0.377	0.073	0.193	0.394	0.4	13.85	0	3
TIM21	grey	0.392	0.059	0.15	0.402	0.402	9.25	0	3
AIM26	grey	0.375	0.069	0.184	0.388	0.396	14.72	0	3
PIG1	grey	0.386	0.059	0.154	0.396	0.4	8.13	0	3
HAP2	grey	0.392	0.061	0.157	0.399	0.399	8.22	0	2
YDR215C	grey	0.384	0.065	0.169	0.398	0.401	13.11	0	2
TPK1	grey	0.389	0.065	0.167	0.397	0.407	9.49	0	3
YPR146C	grey	0.387	0.062	0.16	0.397	0.403	8.72	0	2
IRA2	grey	0.4	0.064	0.159	0.409	0.419	8.78	0	2
BZZ1	grey	0.392	0.063	0.161	0.402	0.402	8.25	0	2
MBB1	grey	0.391	0.06	0.154	0.4	0.406	8.93	0	3
YOR008C-A	grey	0.371	0.069	0.184	0.388	0.394	12.99	0	2
RPI1	grey	0.383	0.063	0.164	0.395	0.399	8.93	0	3
YOR186W	grey	0.389	0.06	0.155	0.399	0.401	9	0	3
PFK26	grey	0.383	0.067	0.174	0.398	0.399	13.07	0	3
CHD1	grey	0.393	0.064	0.163	0.403	0.41	8.88	0	2
MLP1	grey	0.382	0.068	0.178	0.397	0.4	13.58	0	2
CLB2	grey	0.393	0.066	0.166	0.406	0.41	13.45	0	2
MAM33	grey	0.389	0.059	0.151	0.398	0.402	8.37	0	3
GCN4	grey	0.375	0.068	0.181	0.391	0.4	13.03	0	3
VFA1	grey	0.386	0.069	0.18	0.4	0.408	15.31	0	3
ICP55	grey	0.398	0.067	0.169	0.408	0.414	9.27	0	3
VPS13	grey	0.396	0.064	0.162	0.406	0.408	8.61	0	3
TMA108	grey	0.371	0.069	0.188	0.385	0.39	14.11	0	2
DOM34	grey	0.395	0.071	0.179	0.402	0.404	7.21	0	2
YDL023C	grey	0.384	0.057	0.149	0.392	0.395	7.45	0	2
IRS4	grey	0.386	0.067	0.174	0.4	0.407	14.07	0	3
CTR9	grey	0.38	0.069	0.183	0.393	0.4	12.94	0	3
TEP1	grey	0.383	0.072	0.189	0.399	0.407	14.57	0	3
DMA1	grey	0.382	0.066	0.173	0.395	0.404	14.38	0	3
AAC1	grey	0.39	0.068	0.173	0.404	0.412	13.27	0	3
DOT6	grey	0.392	0.065	0.166	0.403	0.408	9.07	0	3
ILV6	grey	0.383	0.061	0.16	0.396	0.404	13.48	0	3
MSL1	grey	0.401	0.064	0.16	0.408	0.417	8.95	0	3
YMR052C-A	grey	0.382	0.067	0.175	0.395	0.402	14.15	0	2
PTH1	grey	0.392	0.066	0.169	0.399	0.406	8.78	0	3
AIM46	grey	0.379	0.071	0.188	0.394	0.399	13.79	0	2
YLR241W	grey	0.386	0.063	0.163	0.399	0.406	13.29	0	3
YIL055C	grey	0.392	0.058	0.149	0.401	0.403	7.66	0	3
YGR122C-A	grey	0.388	0.073	0.187	0.404	0.409	14.43	0	3
ERG28	grey	0.365	0.072	0.197	0.379	0.394	16.52	0	2
TDA5	grey	0.379	0.07	0.184	0.393	0.399	12.65	0	3
FIT1	grey	0.391	0.069	0.177	0.405	0.409	13.5	0	3
CDC10	grey	0.394	0.056	0.142	0.402	0.405	8.87	0	3
MRPS17	grey	0.396	0.061	0.154	0.402	0.409	5.87	0	3
SCS2	grey	0.378	0.065	0.173	0.392	0.398	13.37	0	3
PMP3	grey	0.388	0.072	0.185	0.402	0.414	17.35	0	3
BAR1	grey	0.387	0.067	0.173	0.398	0.403	13.4	0	3
YJR061W	grey	0.384	0.07	0.183	0.4	0.404	14.25	0	3
VAC7	grey	0.369	0.075	0.205	0.388	0.401	14.13	0	2
CUE5	grey	0.385	0.053	0.138	0.394	0.402	8.14	0	2
ISW2	grey	0.39	0.056	0.144	0.399	0.4	8.31	0	3
MTO1	grey	0.406	0.068	0.168	0.417	0.421	8.36	0	2
TAF14	grey	0.385	0.073	0.188	0.403	0.415	18.91	0	2
LCL2	grey	0.379	0.063	0.166	0.392	0.4	13.32	0	3
PPR1	grey	0.393	0.058	0.148	0.401	0.411	8.15	0	3
YIL165C	grey	0.392	0.064	0.163	0.402	0.407	7.95	0	3
MAF1	grey	0.388	0.069	0.177	0.402	0.416	16.64	0	2
SIM1	blue	0.377	0.067	0.178	0.391	0.404	15.29	0	2
MAM1	blue	0.382	0.073	0.19	0.398	0.406	15.46	0	3
YBR226C	blue	0.383	0.071	0.184	0.4	0.409	15.97	0	2
YNL013C	blue	0.383	0.07	0.182	0.398	0.406	14.22	0	3
SWE1	blue	0.38	0.068	0.179	0.394	0.403	13.48	0	3
VPS17	blue	0.371	0.071	0.191	0.385	0.405	16.69	0	2
QCR2	blue	0.378	0.075	0.199	0.392	0.401	15.48	0	2
STE18	blue	0.39	0.07	0.179	0.406	0.413	13.95	0	3
HIS5	blue	0.383	0.068	0.179	0.397	0.4	13.82	0	3
EXG2	blue	0.386	0.069	0.178	0.401	0.412	13.98	0	3
VPS75	blue	0.376	0.065	0.172	0.39	0.396	13.64	0	3
COX17	blue	0.384	0.071	0.185	0.401	0.414	15.6	0	3
SNX41	blue	0.384	0.076	0.199	0.401	0.41	13.53	0	3
YCL023C	blue	0.375	0.07	0.187	0.389	0.396	14.08	0	3
YIH1	blue	0.379	0.077	0.205	0.399	0.406	16.44	0	2
DIE2	blue	0.378	0.072	0.19	0.396	0.408	16.54	0	2
UFD2	blue	0.385	0.081	0.21	0.402	0.41	15.93	0	2
ARP1	blue	0.374	0.071	0.189	0.39	0.401	15.17	0	2
NHX1	blue	0.379	0.071	0.187	0.397	0.41	15.95	0	2
PET191	blue	0.389	0.072	0.184	0.405	0.414	16.07	0	2
VPS35	blue	0.382	0.065	0.171	0.397	0.404	13.87	0	3
TOD6	blue	0.384	0.071	0.184	0.401	0.41	13.75	0	3
HLR1	blue	0.377	0.063	0.168	0.391	0.401	16.11	0	2
SAL1	blue	0.379	0.071	0.186	0.395	0.402	15.91	0	2
CSH1	blue	0.368	0.07	0.191	0.385	0.392	14.29	0	2
YHR078W	blue	0.376	0.072	0.192	0.394	0.402	16.71	0	2
ARG8	blue	0.372	0.072	0.193	0.387	0.4	14.91	0	2
COY1	blue	0.372	0.07	0.188	0.385	0.397	15.19	0	2
RPS19B	blue	0.389	0.069	0.176	0.405	0.415	16.2	0	2
MSS1	blue	0.375	0.068	0.182	0.391	0.4	16.7	0	2
VPS24	blue	0.359	0.063	0.175	0.372	0.388	14.84	0	2
CPR1	blue	0.386	0.067	0.174	0.399	0.405	13.75	0	3
FRA1	blue	0.378	0.072	0.19	0.394	0.401	15.03	0	3
MRPS5	blue	0.374	0.08	0.214	0.395	0.406	18.33	0	2
DUG2	blue	0.366	0.066	0.18	0.378	0.387	13.32	0	3
DMA2	blue	0.383	0.069	0.179	0.399	0.407	13.8	0	3
PCD1	blue	0.378	0.067	0.178	0.392	0.405	14.34	0	3
VHR1	blue	0.385	0.077	0.202	0.406	0.418	18.45	0	2
NTH1	blue	0.372	0.08	0.214	0.394	0.405	18.88	0	2
SPG5	blue	0.369	0.074	0.202	0.391	0.405	19.66	0	2
SYN8	blue	0.368	0.071	0.193	0.388	0.398	19.31	0	2
SRO9	blue	0.387	0.073	0.189	0.402	0.415	19.42	0	2
ACO1	blue	0.384	0.074	0.193	0.397	0.401	13.78	0	3
STE50	blue	0.393	0.063	0.159	0.406	0.414	14.02	0	3
YBR016W	blue	0.367	0.074	0.202	0.386	0.396	17.5	0	2
BIO3	blue	0.37	0.071	0.193	0.386	0.393	16.77	0	2
MRPL13	blue	0.354	0.081	0.229	0.365	0.404	22.89	0	2
SAC6	blue	0.363	0.077	0.214	0.379	0.399	19.9	0	2
QRI5	blue	0.378	0.079	0.209	0.399	0.412	20.92	0	2
SLG1	blue	0.368	0.072	0.195	0.385	0.405	20.93	0	2
IES1	blue	0.377	0.074	0.198	0.392	0.413	19.8	0	2
SLI15	blue	0.381	0.074	0.195	0.399	0.412	20.46	0	2
JNM1	blue	0.383	0.067	0.175	0.397	0.406	16.27	0	3
SLM1	blue	0.377	0.066	0.176	0.393	0.401	14.16	0	3
DIG1	blue	0.368	0.075	0.204	0.385	0.402	21.99	0	2
TDA8	blue	0.36	0.084	0.232	0.38	0.401	22.15	0	2
CDC55	blue	0.387	0.071	0.183	0.401	0.41	14.19	0	3
YNL146W	blue	0.378	0.069	0.183	0.393	0.403	14.49	0	3
SEC28	blue	0.37	0.085	0.23	0.396	0.414	24.82	0	2
QCR7	blue	0.352	0.093	0.264	0.381	0.398	24.31	0	2
ATP12	blue	0.33	0.112	0.338	0.364	0.409	35.79	0	2
GNP1	blue	0.389	0.073	0.188	0.405	0.412	15.35	0	3
UGA2	blue	0.371	0.073	0.197	0.388	0.393	13.87	0	3
PHO84	blue	0.395	0.068	0.172	0.409	0.418	15.48	0	3
ALR2	blue	0.374	0.066	0.177	0.387	0.395	14.16	0	3
PHO89	blue	0.383	0.069	0.18	0.398	0.409	14.43	0	3
NTH2	blue	0.38	0.071	0.187	0.397	0.402	14.23	0	3
PTC1	blue	0.378	0.08	0.212	0.395	0.411	16.38	0	3
MSH2	blue	0.378	0.073	0.194	0.389	0.405	14.86	0	3
FLC3	blue	0.387	0.071	0.183	0.402	0.407	15.79	0	3
IPK1	blue	0.374	0.069	0.186	0.391	0.401	17.21	0	3
YDL050C	blue	0.377	0.069	0.184	0.392	0.398	14.56	0	3
CPR2	blue	0.38	0.068	0.18	0.395	0.403	16.07	0	3
SUR2	blue	0.381	0.067	0.176	0.396	0.403	14.96	0	3
RAS2	blue	0.375	0.07	0.187	0.391	0.402	15.15	0	3
UBX3	blue	0.383	0.071	0.185	0.399	0.41	14.95	0	3
PET8	blue	0.377	0.068	0.181	0.391	0.396	16.47	0	3
AST2	blue	0.378	0.072	0.192	0.393	0.404	16.37	0	3
HOT1	blue	0.379	0.079	0.207	0.398	0.411	17.25	0	3
YDL177C	blue	0.367	0.072	0.197	0.381	0.385	14.37	0	3
RBG1	blue	0.375	0.066	0.177	0.392	0.404	15.88	0	3
YMR153C-A	blue	0.372	0.067	0.18	0.385	0.392	16.22	0	3
RPL23B	blue	0.378	0.08	0.213	0.397	0.413	18.17	0	3
SGF11	blue	0.37	0.071	0.192	0.387	0.397	16.89	0	3
LRE1	blue	0.375	0.068	0.181	0.39	0.404	16.86	0	3
ASG1	blue	0.374	0.072	0.192	0.39	0.397	15.73	0	3
YCR049C	blue	0.375	0.075	0.199	0.393	0.402	17.86	0	3
WHI5	blue	0.372	0.078	0.211	0.392	0.403	17.41	0	3
UBI4	blue	0.364	0.07	0.193	0.381	0.389	17.11	0	3
TRP4	blue	0.374	0.076	0.204	0.388	0.407	19.68	0	3
YAR029W	blue	0.36	0.073	0.202	0.373	0.393	16.03	0	3
GAT2	blue	0.372	0.079	0.212	0.393	0.401	20.87	0	3
TLG2	blue	0.369	0.076	0.205	0.392	0.405	22.28	0	3
BLM10	blue	0.365	0.078	0.213	0.383	0.4	23.36	0	3
HAP5	blue	0.359	0.086	0.239	0.382	0.396	22.11	0	3
ATP23	blue	0.342	0.095	0.278	0.371	0.405	35.92	0	3
ATP10	blue	0.343	0.095	0.276	0.373	0.402	34.24	0	3
ELO2	Chocolate	0.414	0.065	0.158	0.422	0.424	6.81	0	3
MRPL28	Chocolate	0.404	0.06	0.148	0.409	0.419	6.77	0	3
BNR1	Chocolate	0.407	0.055	0.136	0.413	0.419	6.46	0	3
SMA2	Cyan	0.4	0.07	0.176	0.413	0.429	11.67	0	3
URA2	Cyan	0.406	0.063	0.156	0.418	0.42	11.42	0	3
YBR225W	Cyan	0.402	0.07	0.172	0.415	0.423	12.72	0	2
VPS30	Cyan	0.405	0.063	0.156	0.417	0.422	9.88	0	3
FAR7	Cyan	0.411	0.065	0.159	0.421	0.425	9.96	0	3
NGR1	Cyan	0.408	0.069	0.17	0.419	0.424	9.18	0	3
MDJ1	Brown	0.405	0.077	0.189	0.421	0.431	14.52	0	3
ASF1	Brown	0.411	0.076	0.186	0.431	0.44	17.87	0	3
BUB1	Brown	0.396	0.078	0.198	0.417	0.436	25.48	0	3
ATP20	Brown	0.347	0.105	0.301	0.377	0.422	39.88	0	3
