# Supplementary material for: Single cell functional genomics reveals the importance of mitochondria in cell-to-cell phenotypic variation
Source: eLife journal article supplement (doi:10.7554/elife.38904), 2019-01-14
Supplement: supp [file elife-38904-supp-v1.zip › elife_poa_e38904_Supplementary_File_3.xlsx]

## Sheet: Sheet1
S. No	Gene/Primer Name	Target DNA	Forward primer (5'->3')	Reverse primer (5' -> 3')
1	ACT1	nuclear DNA	CGGTGATGGTGTTACTCACG	GGCCAAATCGATTCTCAAAA
2	ALG9	nuclear DNA	CACGGATAGTGGCTTTGGTGAACAATTAC	TATGATTATCTGGCAGCAGGAAAGAACTTGGG
3	KRE11	nuclear DNA	AACTGGTTCTGTTACCCAAATCAACTCAAC	AACGCTTCAATGTGACTTCTGTTTCCC
4	TAF10	nuclear DNA	ATATTCCAGGATCAGGTCTTCCGTAGC	GTAGTCTTCTCATTCTGTTGATGTTGTTGTTG
5	COX9	nuclear DNA	TCATCATGGACATCGTCCTC	GAATCCCCACCACCAGTAAG
6	COX1	mtDNA	GGTGCTGGTACAGGGTGAAC	GGTCCTGAATGTGCCTGAAT
7	ATP6	mtDNA	TTCGGTTTTGTACCTTTAGCTATG	AGCCCAGACATATCCCTGAA
8	COX3	mtDNA	TCCATTCAGCTATGAGTCCTGA	TCAATACCTACGGGTGGTCAA
9	ATP9	mtDNA	TGGTGTATCAAGAAACCCATCA	AGCTTCTGATAAGGCGAAACC
10	tRNA	mtDNA	TGGTGGAATTGGTAGACACG	TGCTATTTAAAGGACTTGAACCTT
