# Supplementary material for: Single cell functional genomics reveals the importance of mitochondria in cell-to-cell phenotypic variation
Source: eLife journal article supplement (doi:10.7554/elife.38904), 2019-01-14

Figure 2 - figure supplement 2

A

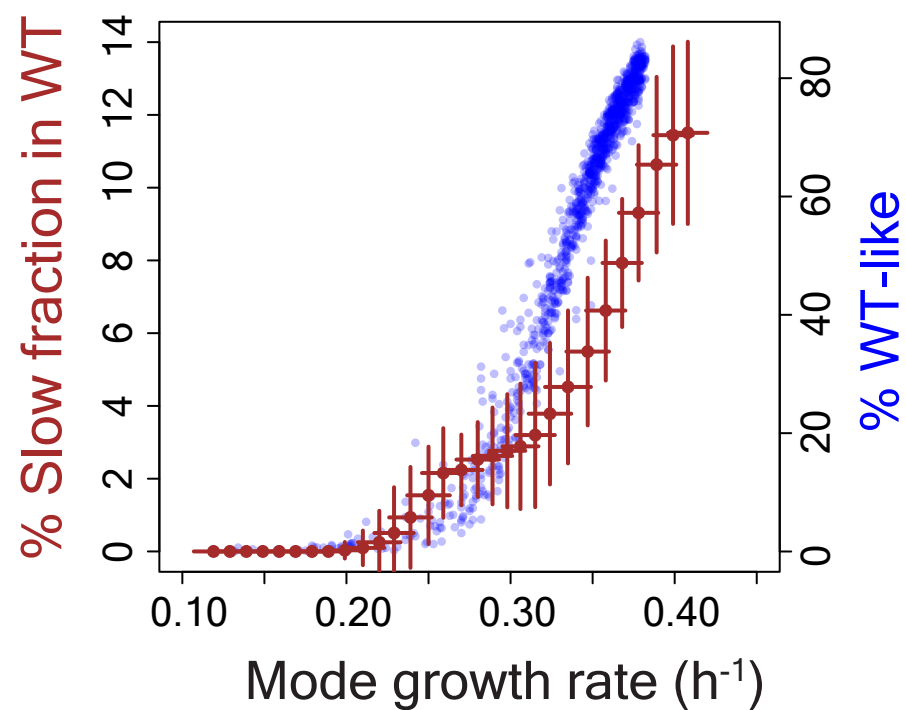

B

— mt envelope localized (8.2%)    — mt (non-envelope) localized (17.2%)    — non-mt localized (74.6%)

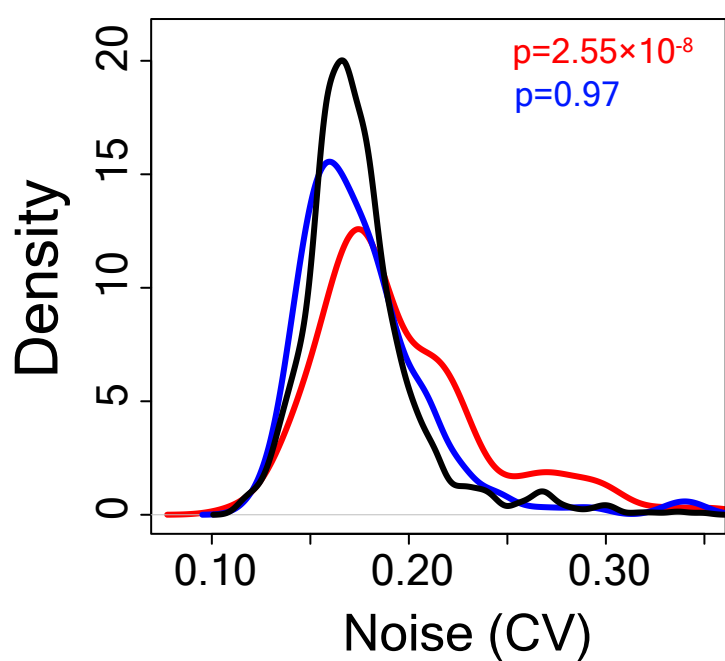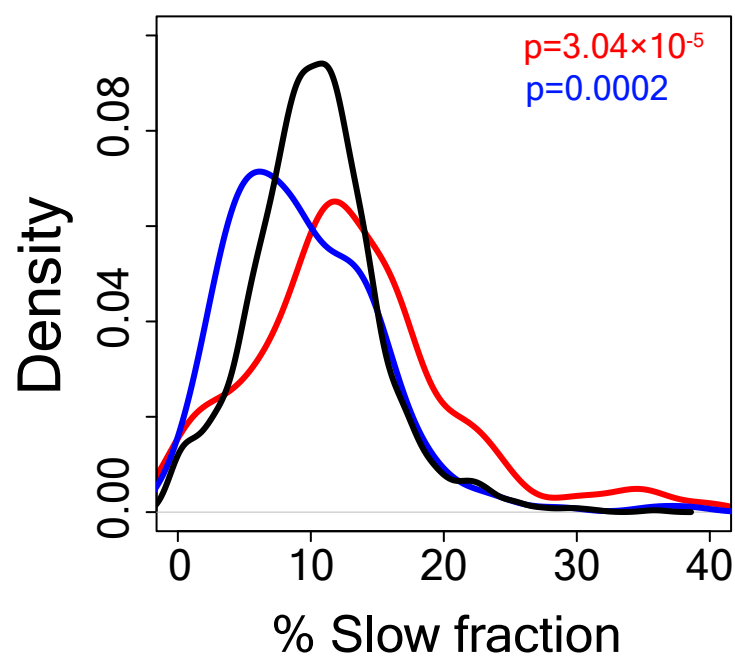

C

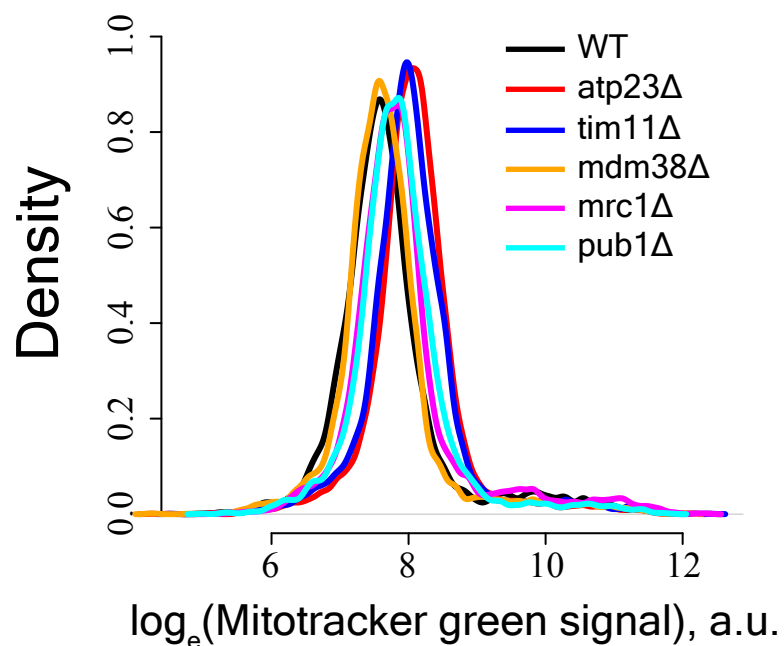

Supplement: supp [file elife_poa_e38904_Figure_2_figure_supplement_2.pdf › elife_poa_e38904_Figure_2_figure_supplement_2.pdf]
