# Supplementary figures and images for: Single cell functional genomics reveals the importance of mitochondria in cell-to-cell phenotypic variation
Source: eLife journal article supplement (doi:10.7554/elife.38904), 2019-01-14

Figure 4 - figure supplement 1

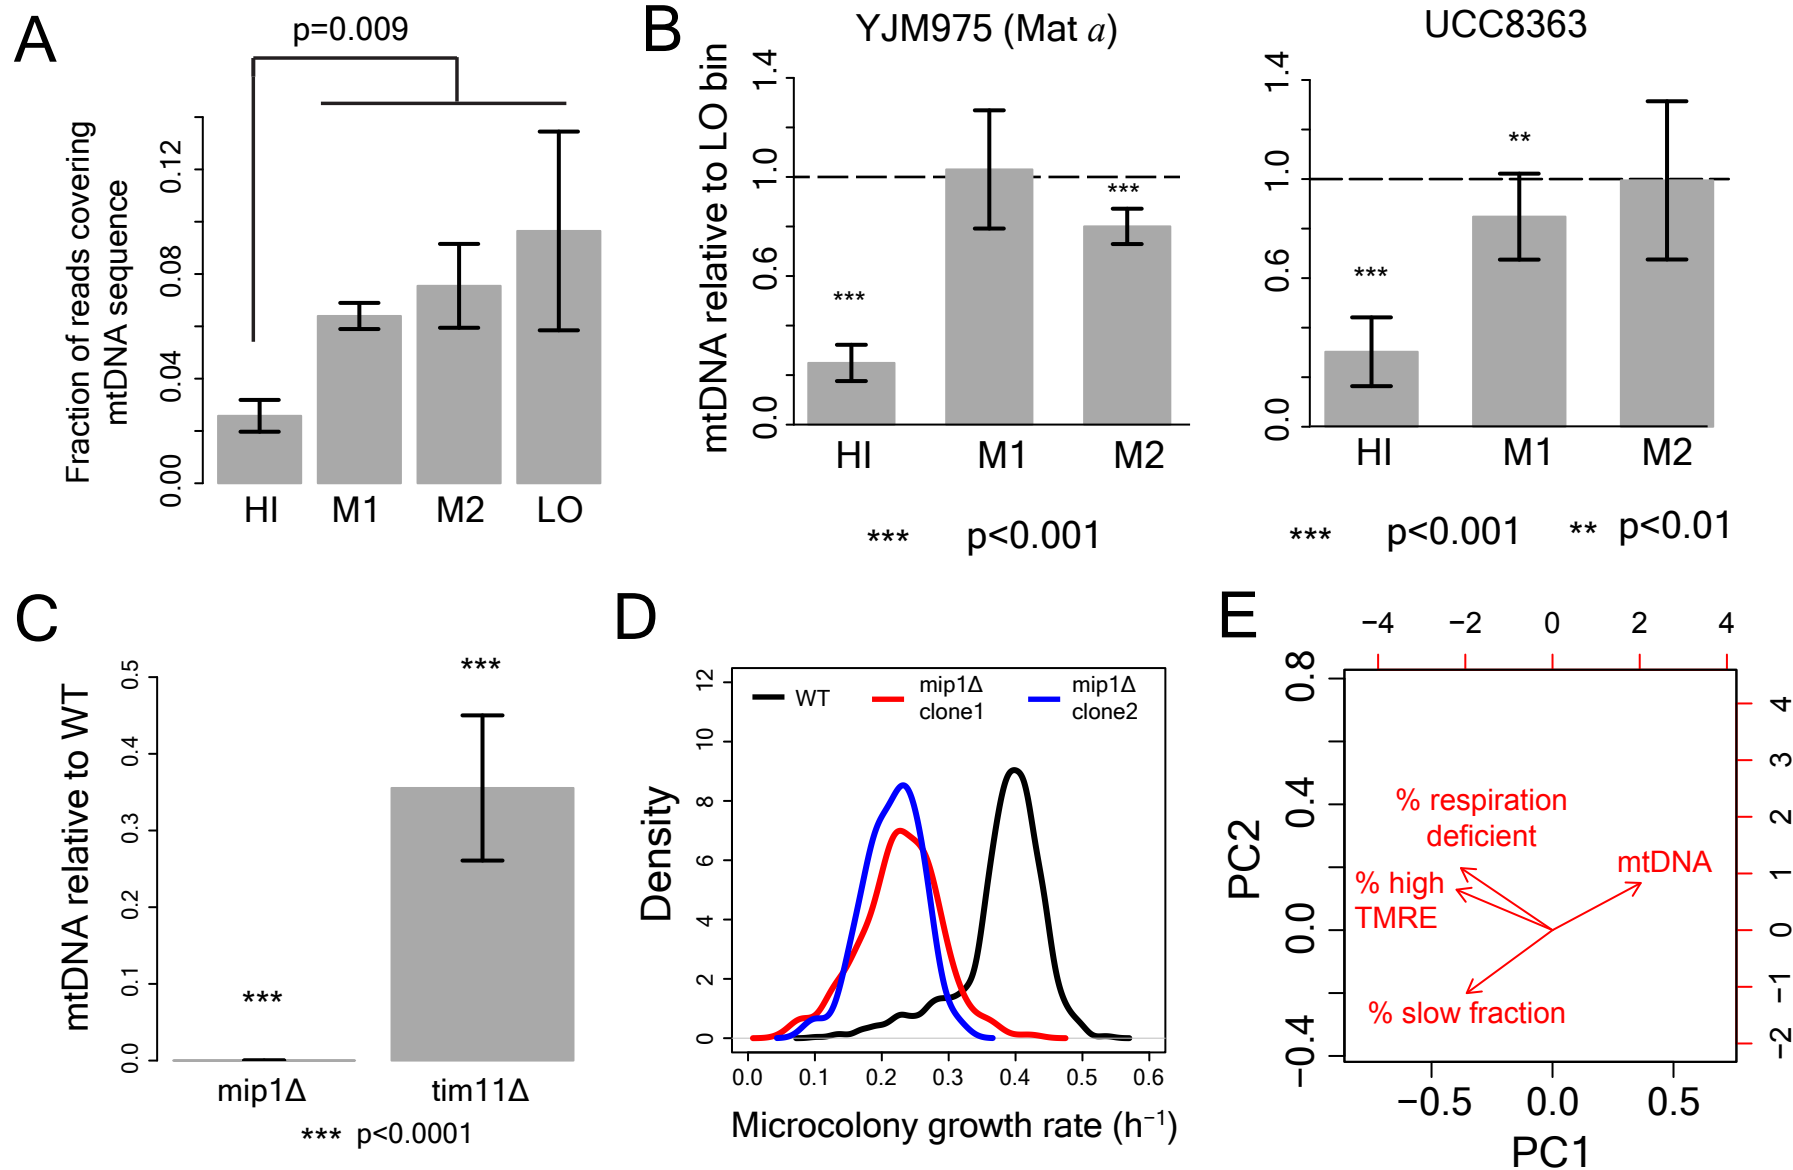

Supplement: supp [file elife-38904-supp-v1.zip › elife_poa_e38904_Figure_4_figure_supplement_1.pdf]

Figure 5 - figure supplement 12

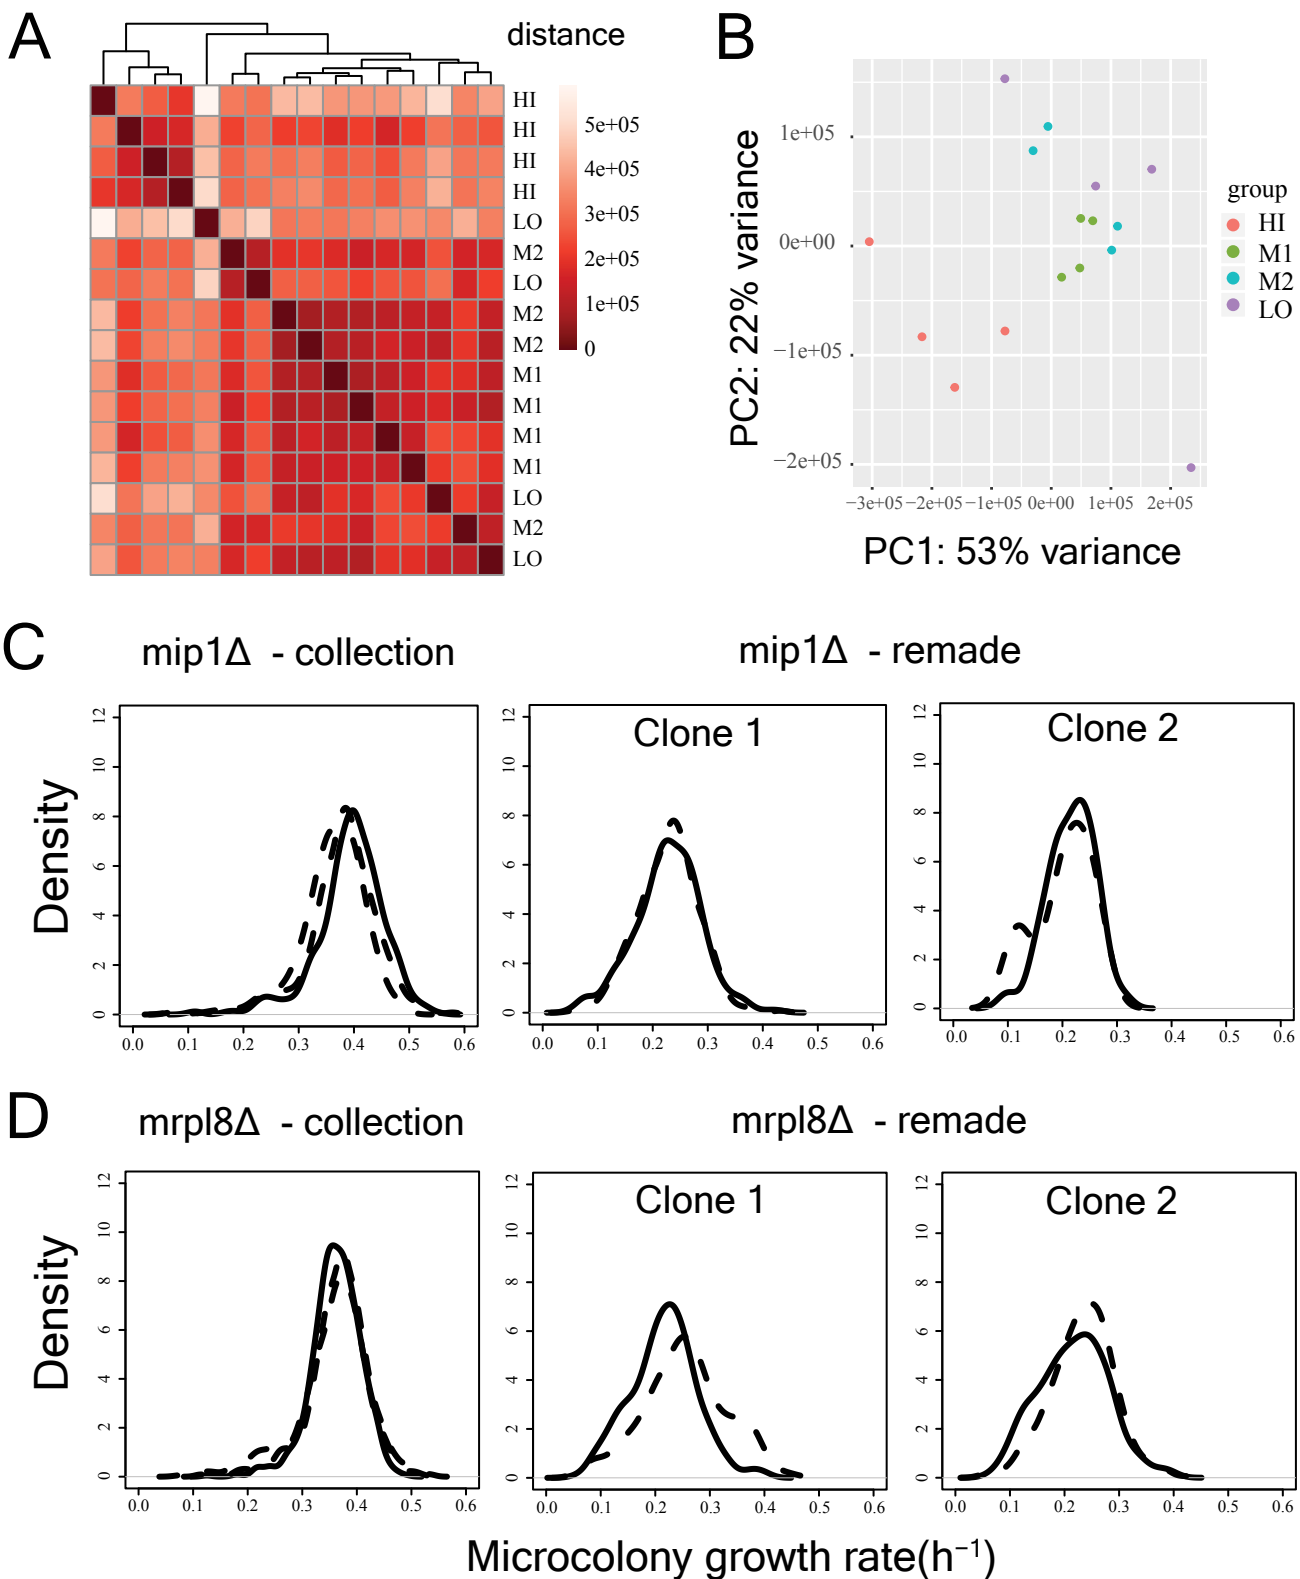

Supplement: supp [file elife-38904-supp-v1.zip › elife_poa_e38904_Figure_5_figure_supplement_12.pdf]

# FACSDiva Version 6.1.2

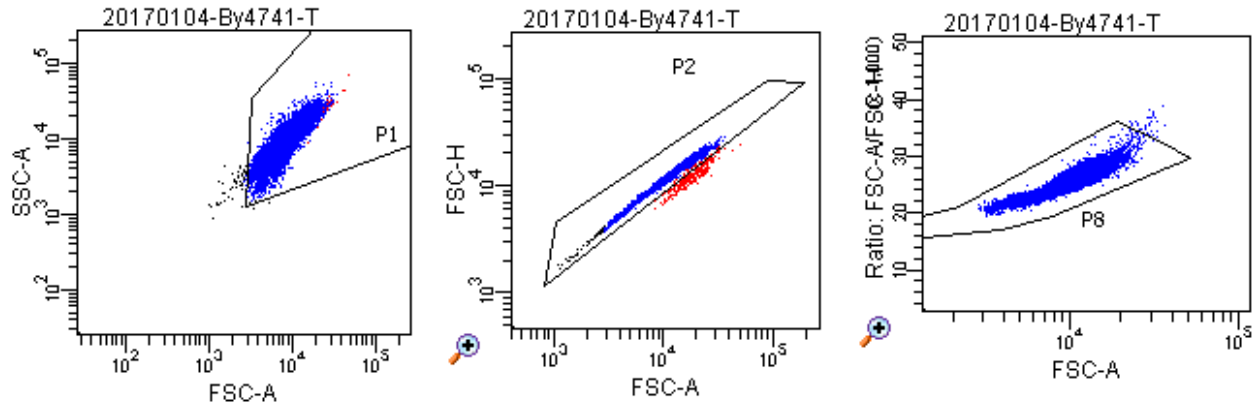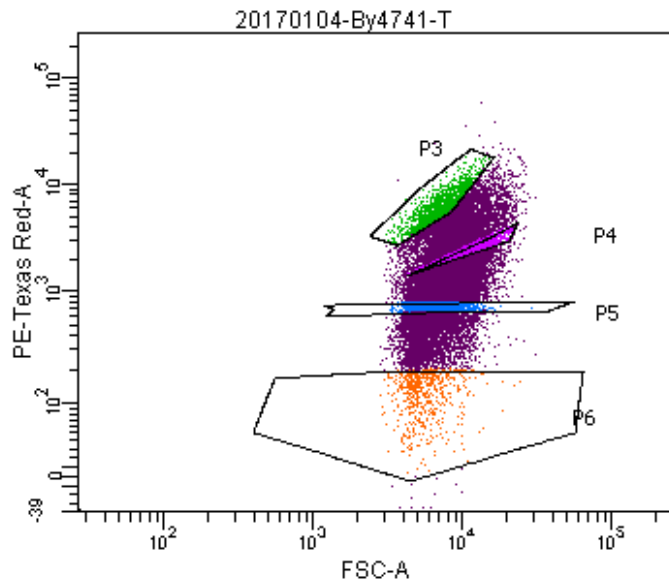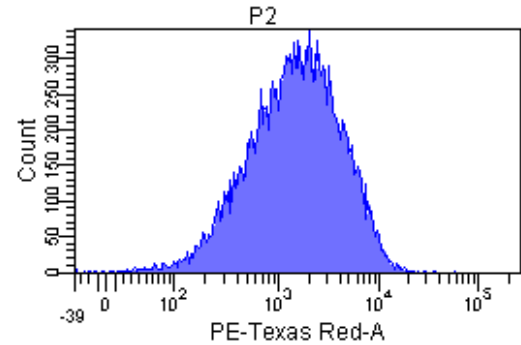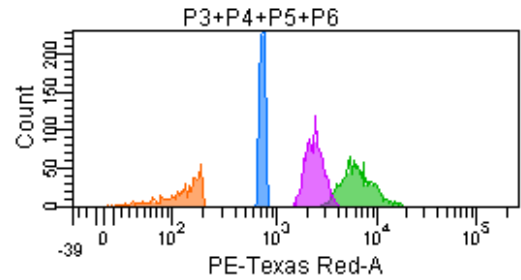

| Tube: By4741-T |         |         |        |
|----------------|---------|---------|--------|
| Population     | #Events | %Parent | %Total |
| All Events     | 20,357  | ###     | 100.0  |
| P1             | 20,300  | 99.7    | 99.7   |
| P2             | 20,000  | 98.5    | 98.2   |
| P8             | 19,972  | 99.9    | 98.1   |
| P3             | 1,133   | 5.7     | 5.6    |
| P4             | 1,168   | 5.8     | 5.7    |
| P5             | 1,129   | 5.7     | 5.5    |
| P6             | 633     | 3.2     | 3.1    |

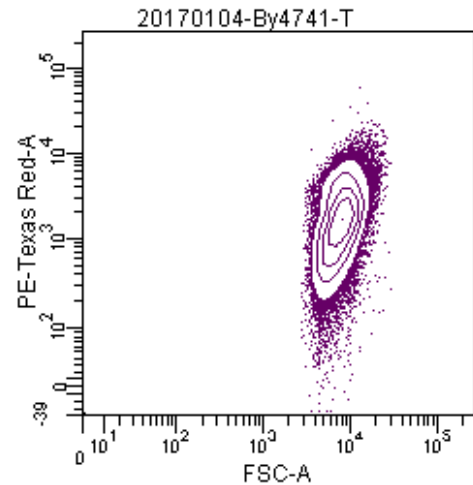

Supplement: supp [file elife-38904-supp-v1.zip › elife_poa_e38904_Supplementary_File_5.pdf]

Figure 5 - figure supplement 11

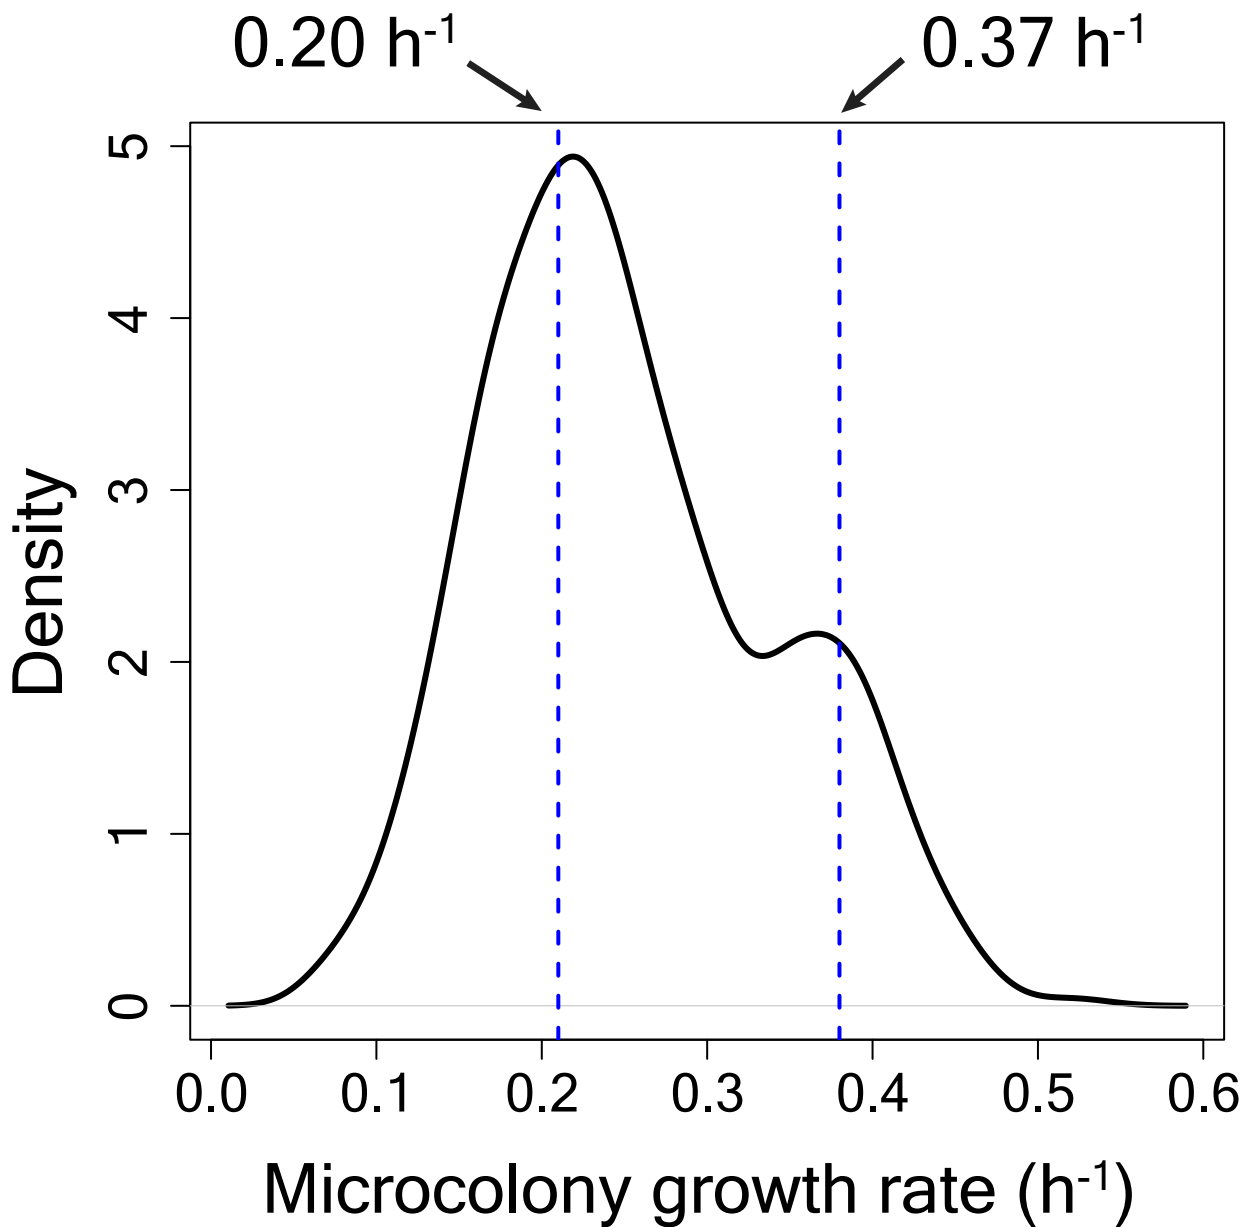

Supplement: supp [file elife-38904-supp-v1.zip › elife_poa_e38904_Figure_5_figure_supplement_11.pdf]

Figure 3 - figure supplement 2

(A)

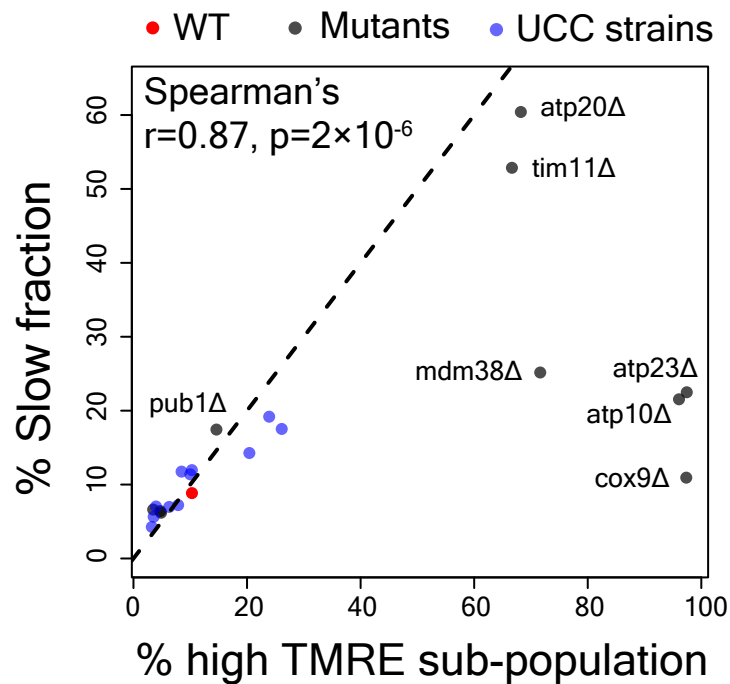

(B)

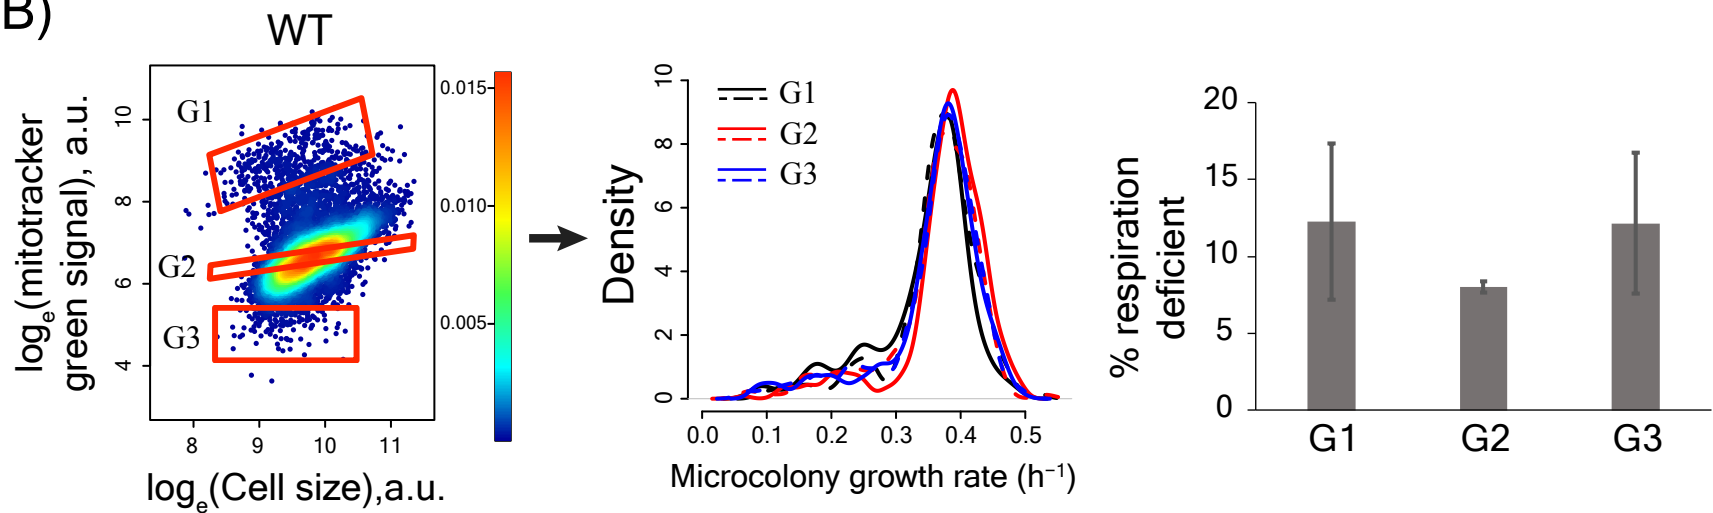

Supplement: supp [file elife-38904-supp-v1.zip › elife_poa_e38904_Figure_3_figure_supplement_2.pdf]

Figure 2 - figure supplement 2

A

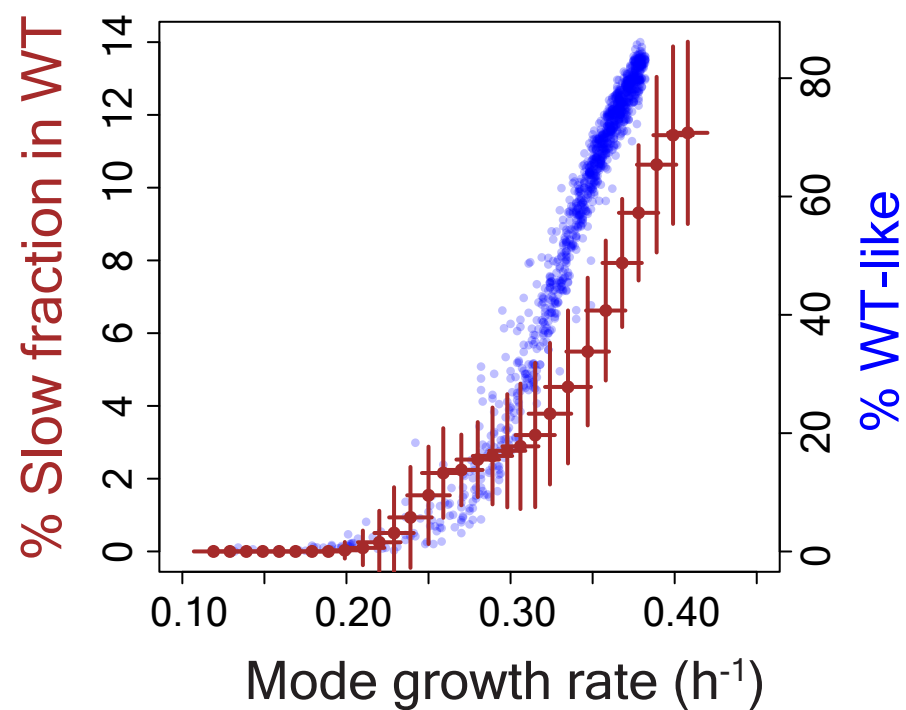

B

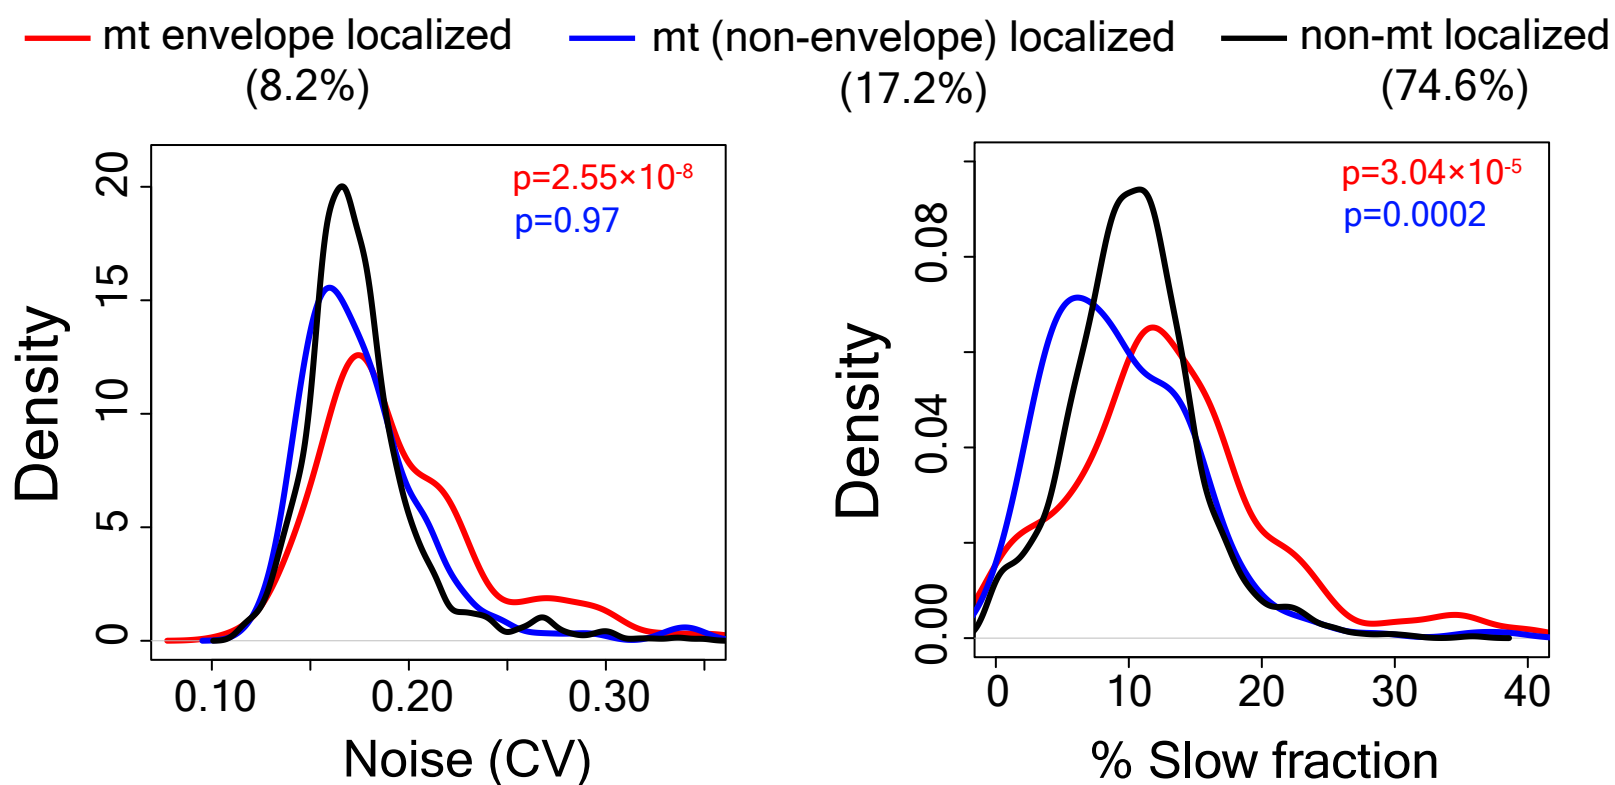

C

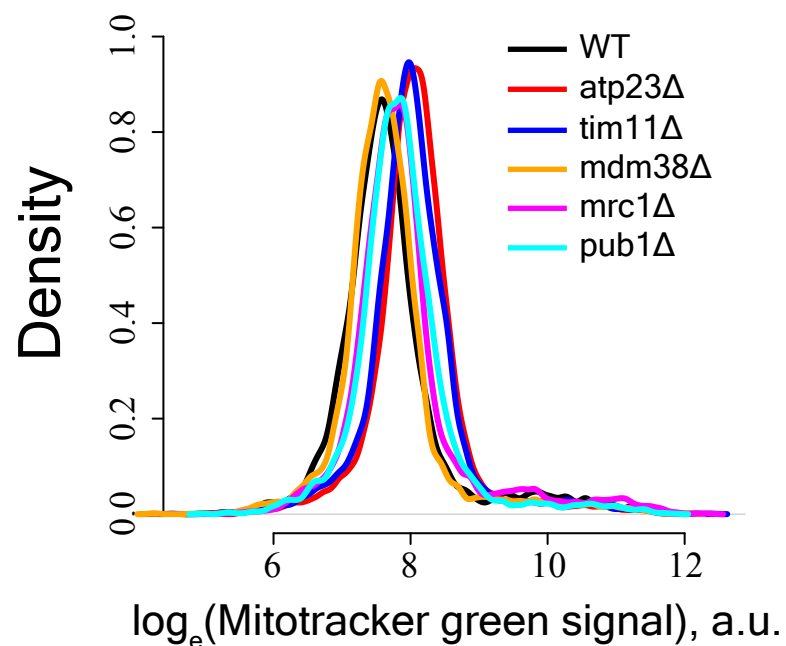

Supplement: supp [file elife-38904-supp-v1.zip › elife_poa_e38904_Figure_2_figure_supplement_2.pdf]

Figure 3 - figure supplement 1

A

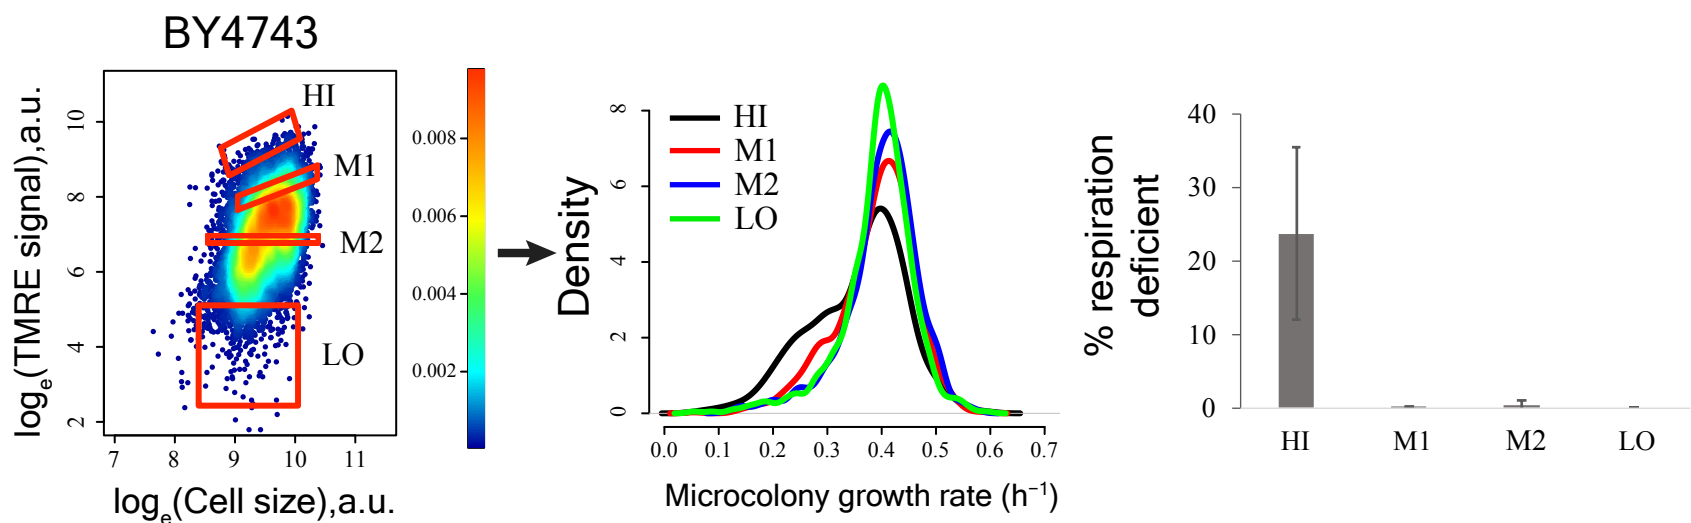

B

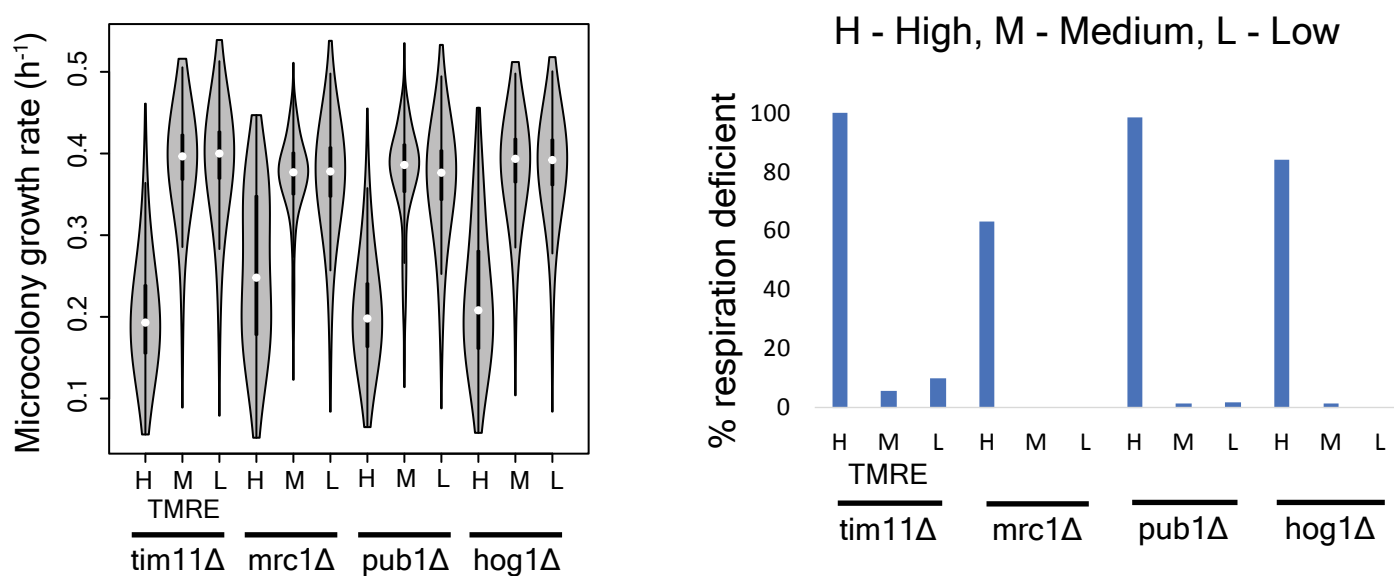

C

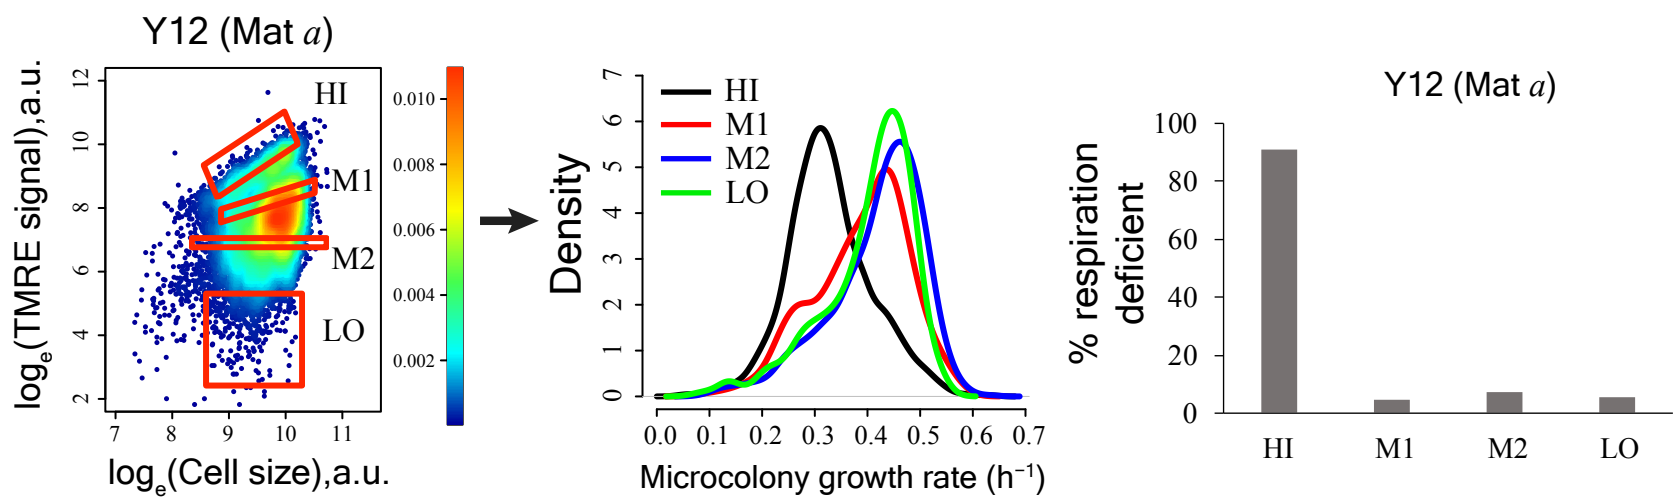

D

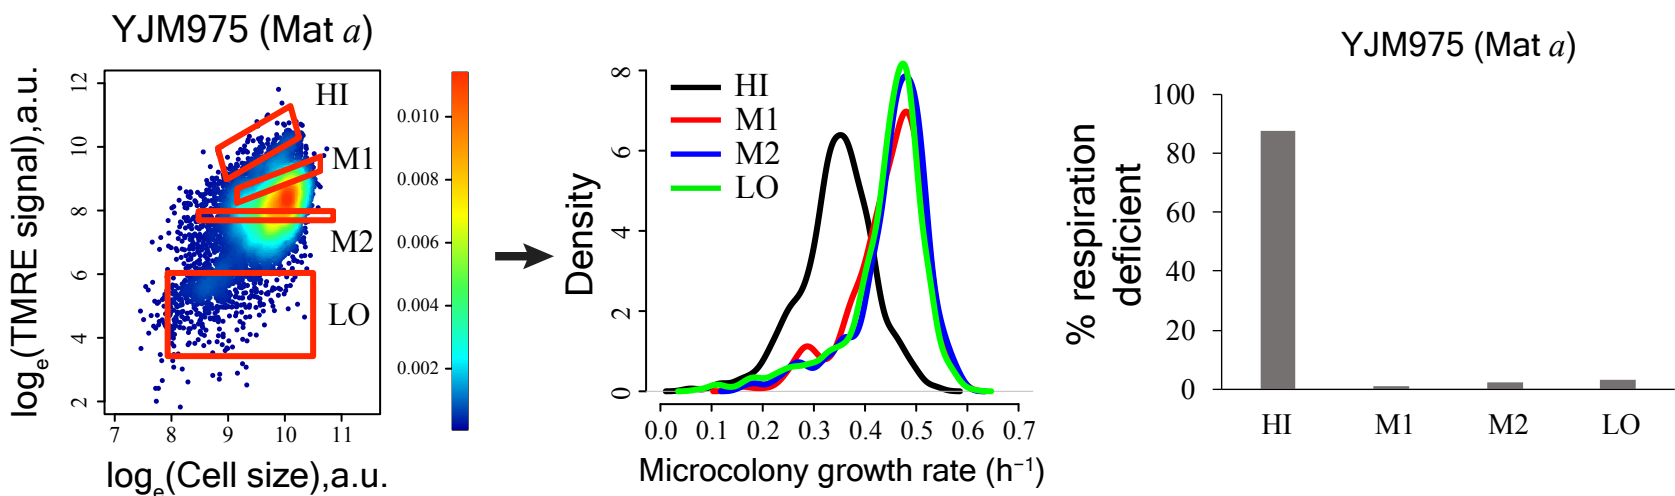

Supplement: supp [file elife-38904-supp-v1.zip › elife_poa_e38904_Figure_3_figure_supplement_1.pdf]

Figure 5 - figure supplement 4

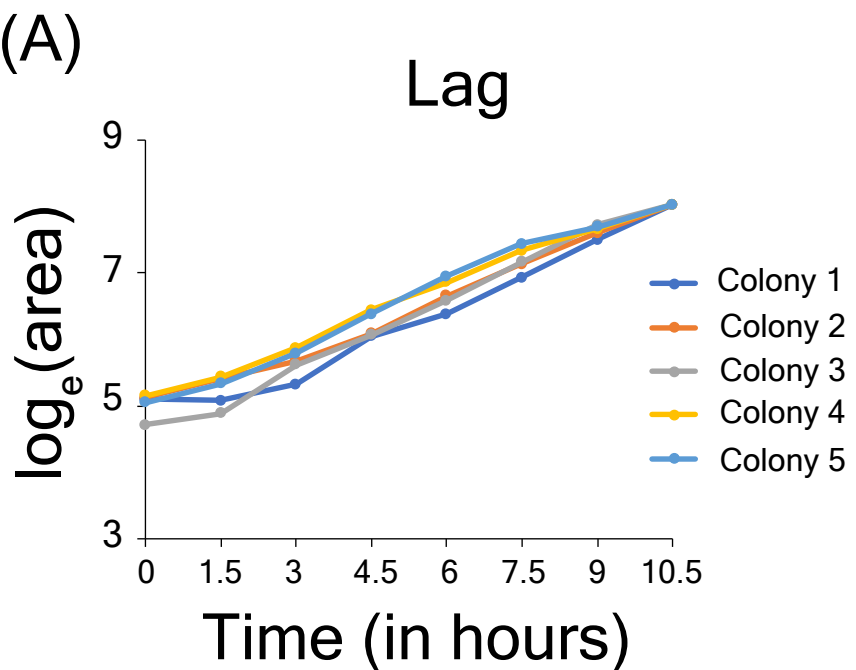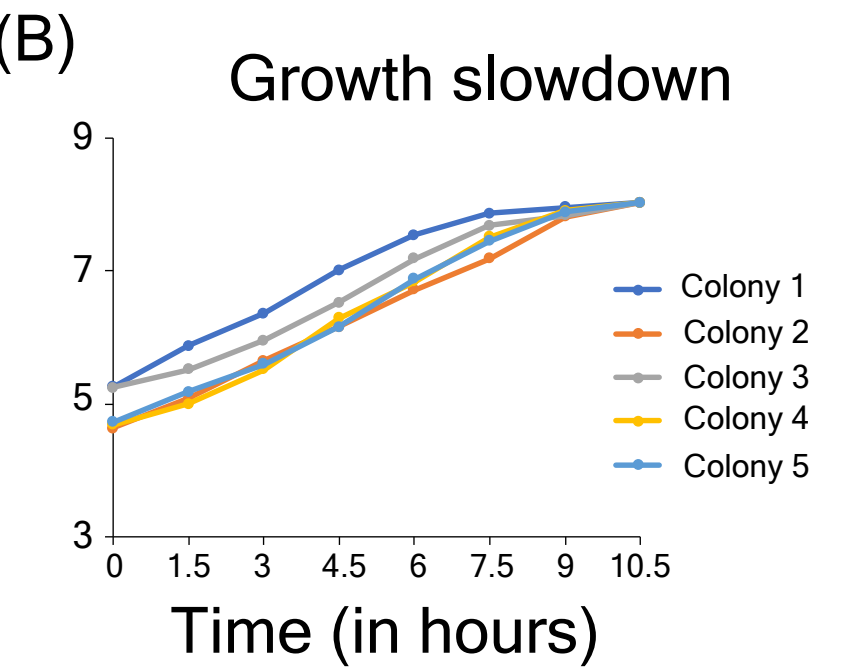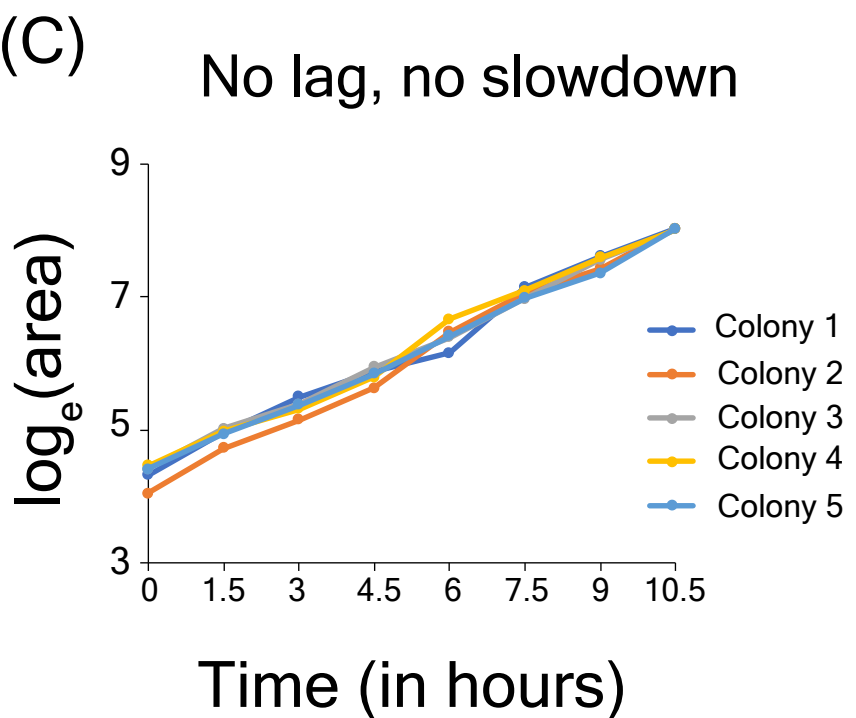

Supplement: supp [file elife-38904-supp-v1.zip › elife_poa_e38904_Figure_5_figure_supplement_4.pdf]

Figure 2 - figure supplement 1

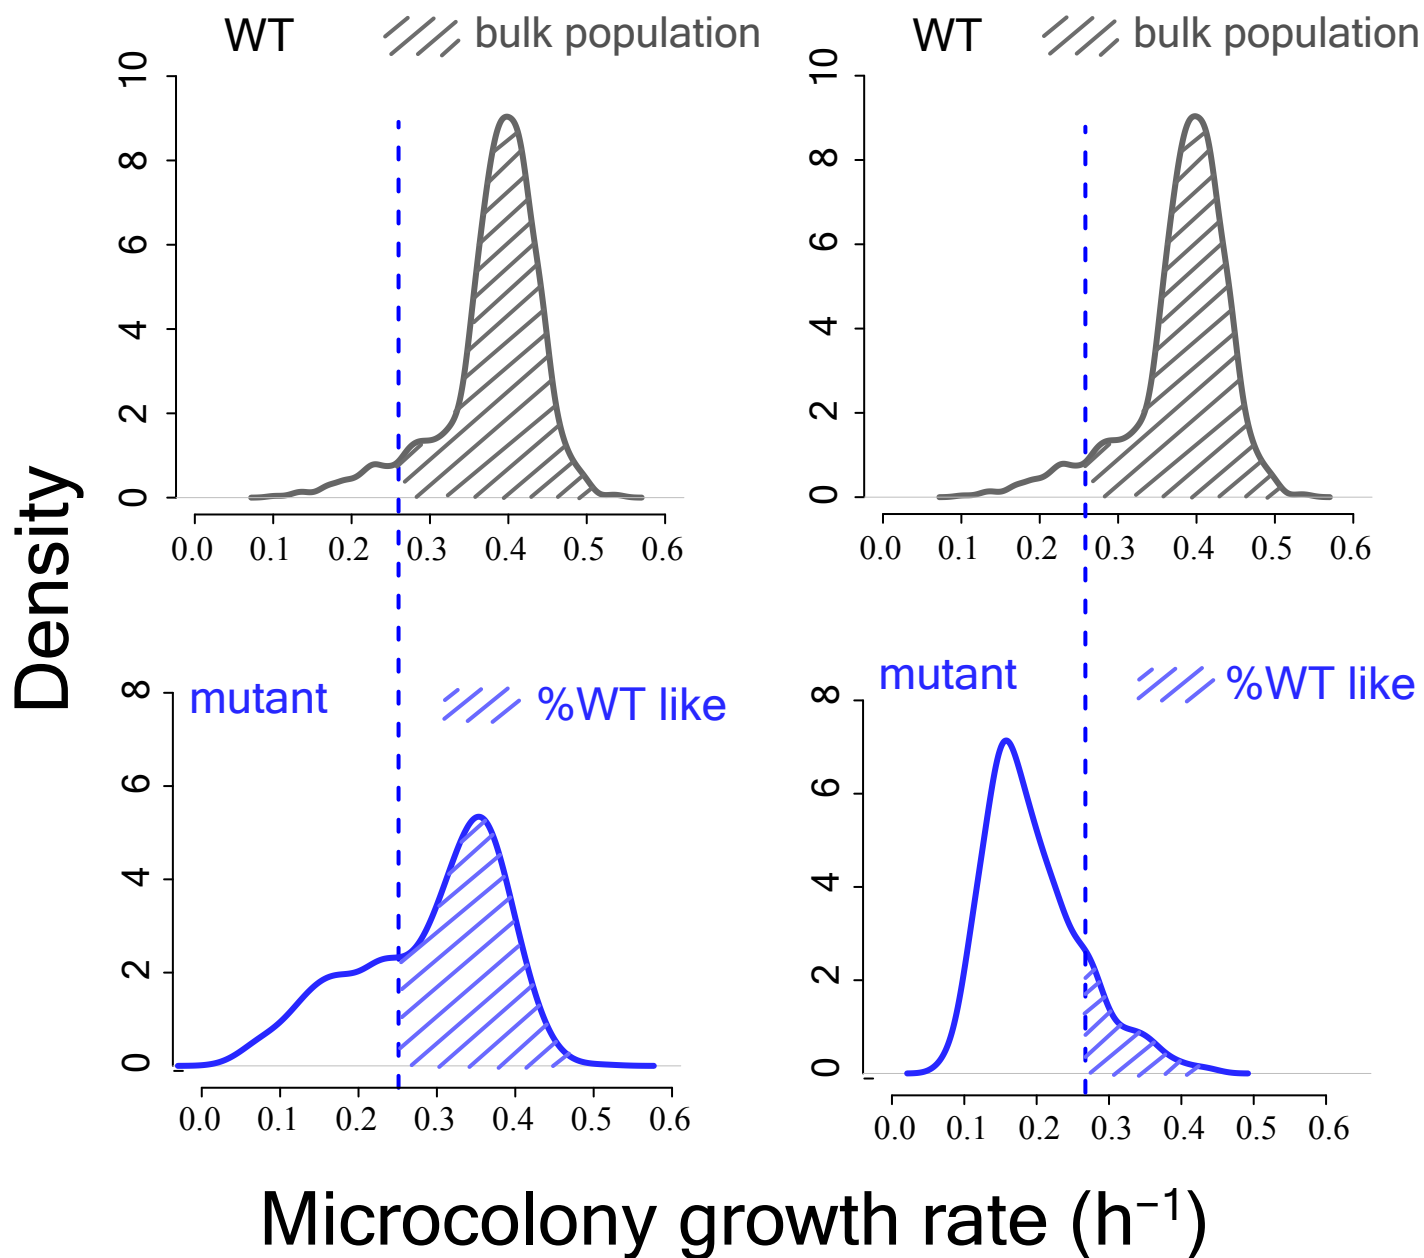

Supplement: supp [file elife-38904-supp-v1.zip › elife_poa_e38904_Figure_2_figure_supplement_1.pdf]

# Figure 5 - figure supplement 1

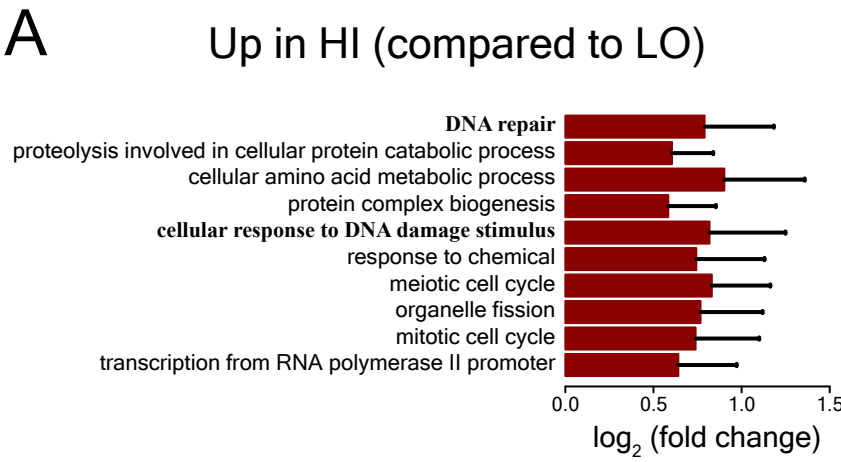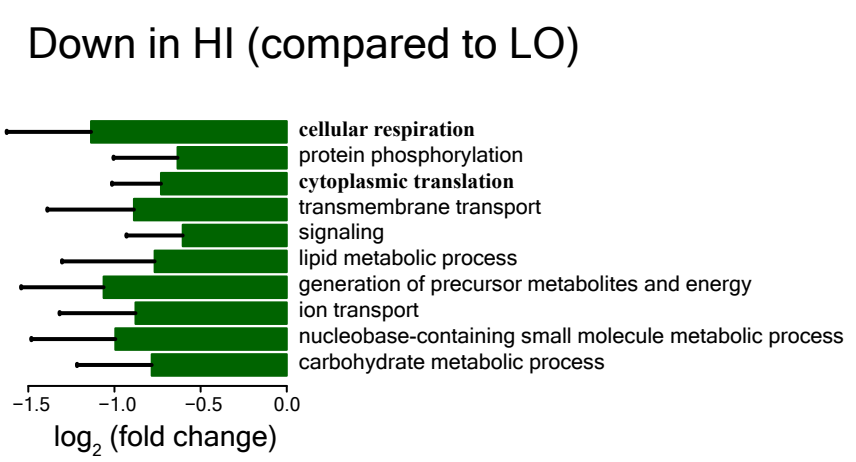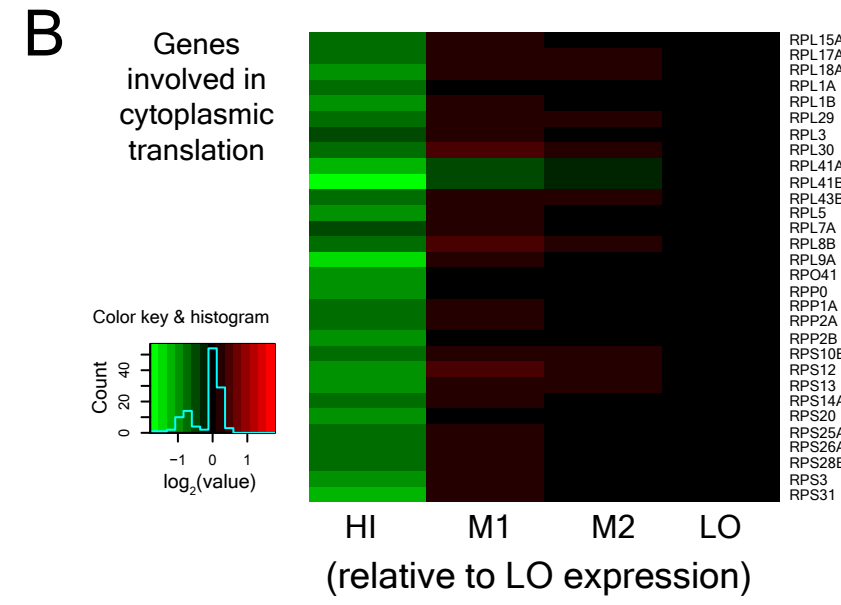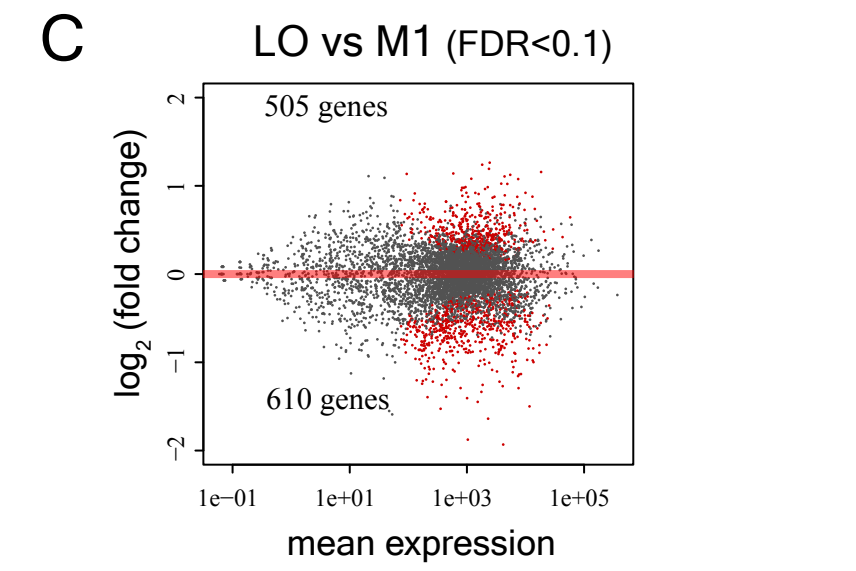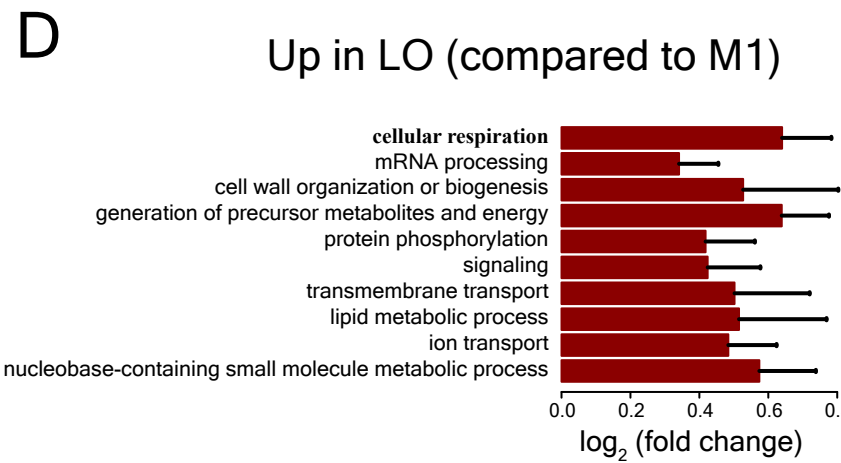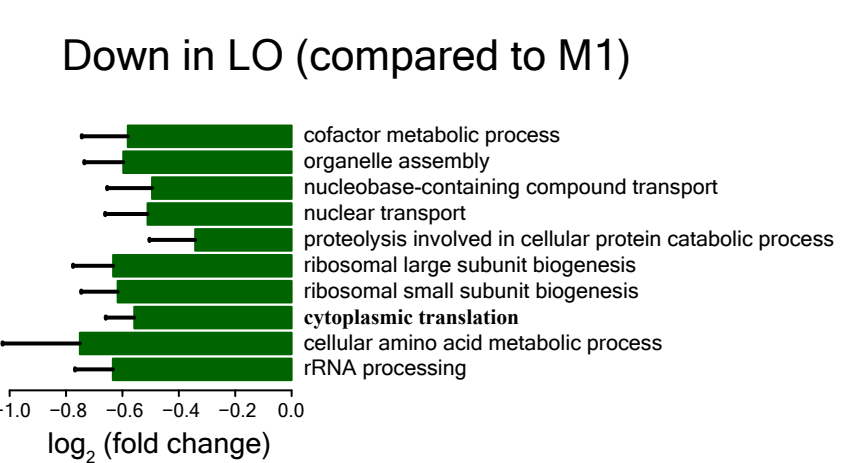

Supplement: supp [file elife-38904-supp-v1.zip › elife_poa_e38904_Figure_5_figure_supplement_1.pdf]

Figure 5 - figure supplement 6

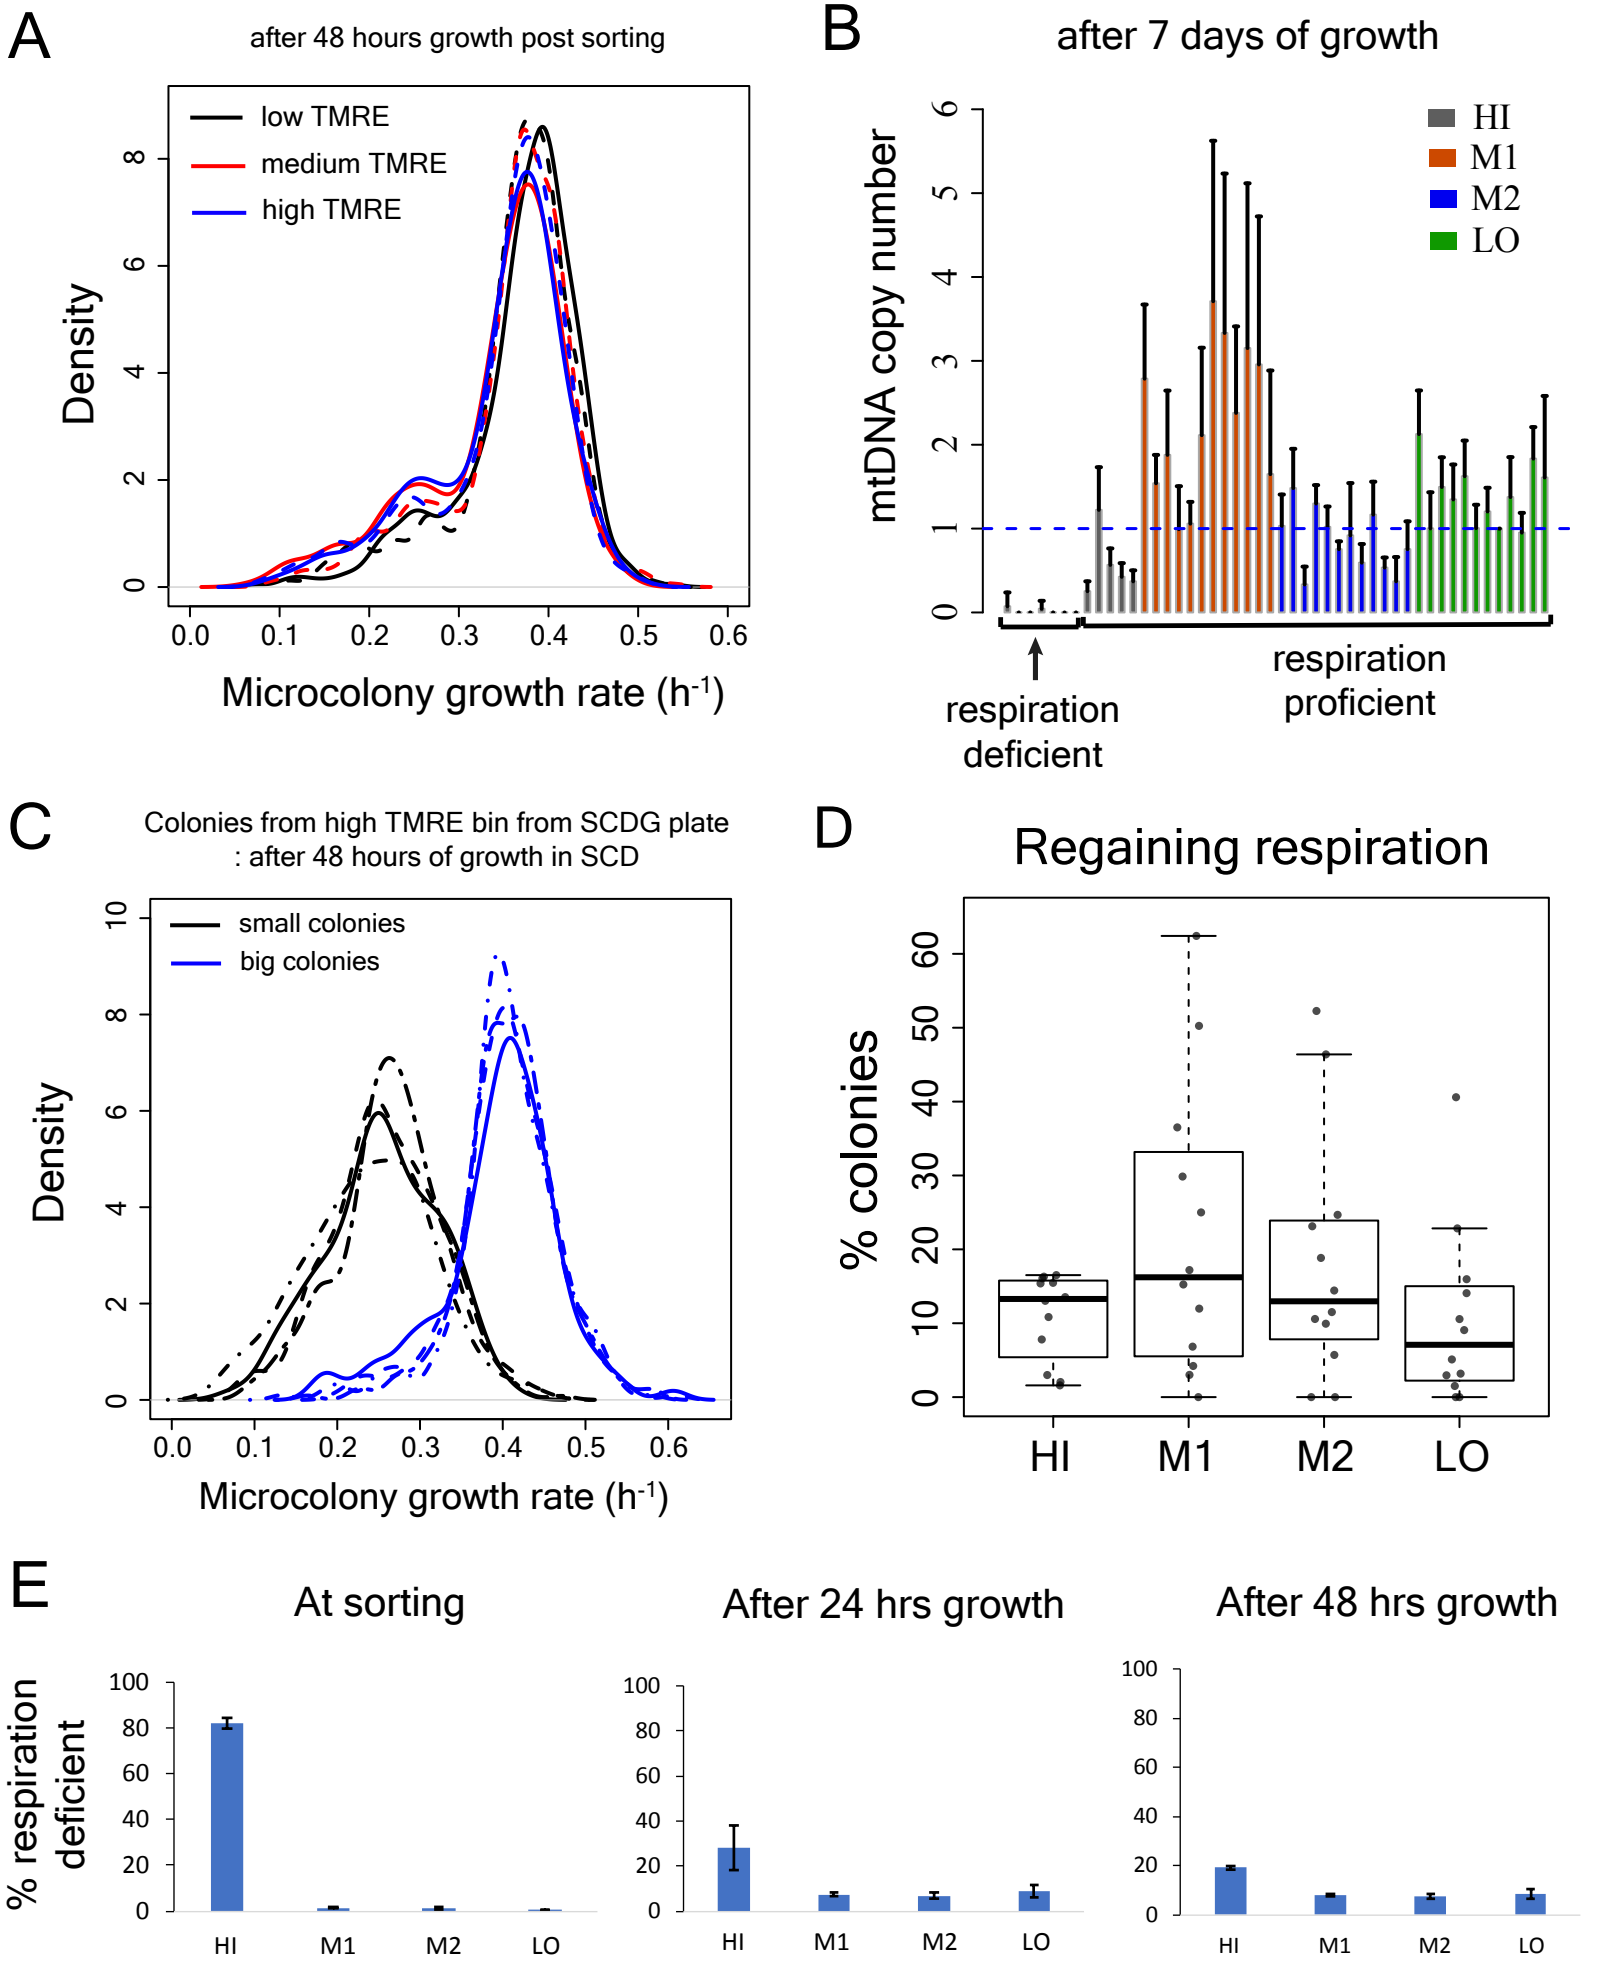

Supplement: supp [file elife-38904-supp-v1.zip › elife_poa_e38904_Figure_5_figure_supplement_6.pdf]

Figure 5 - figure supplement 10

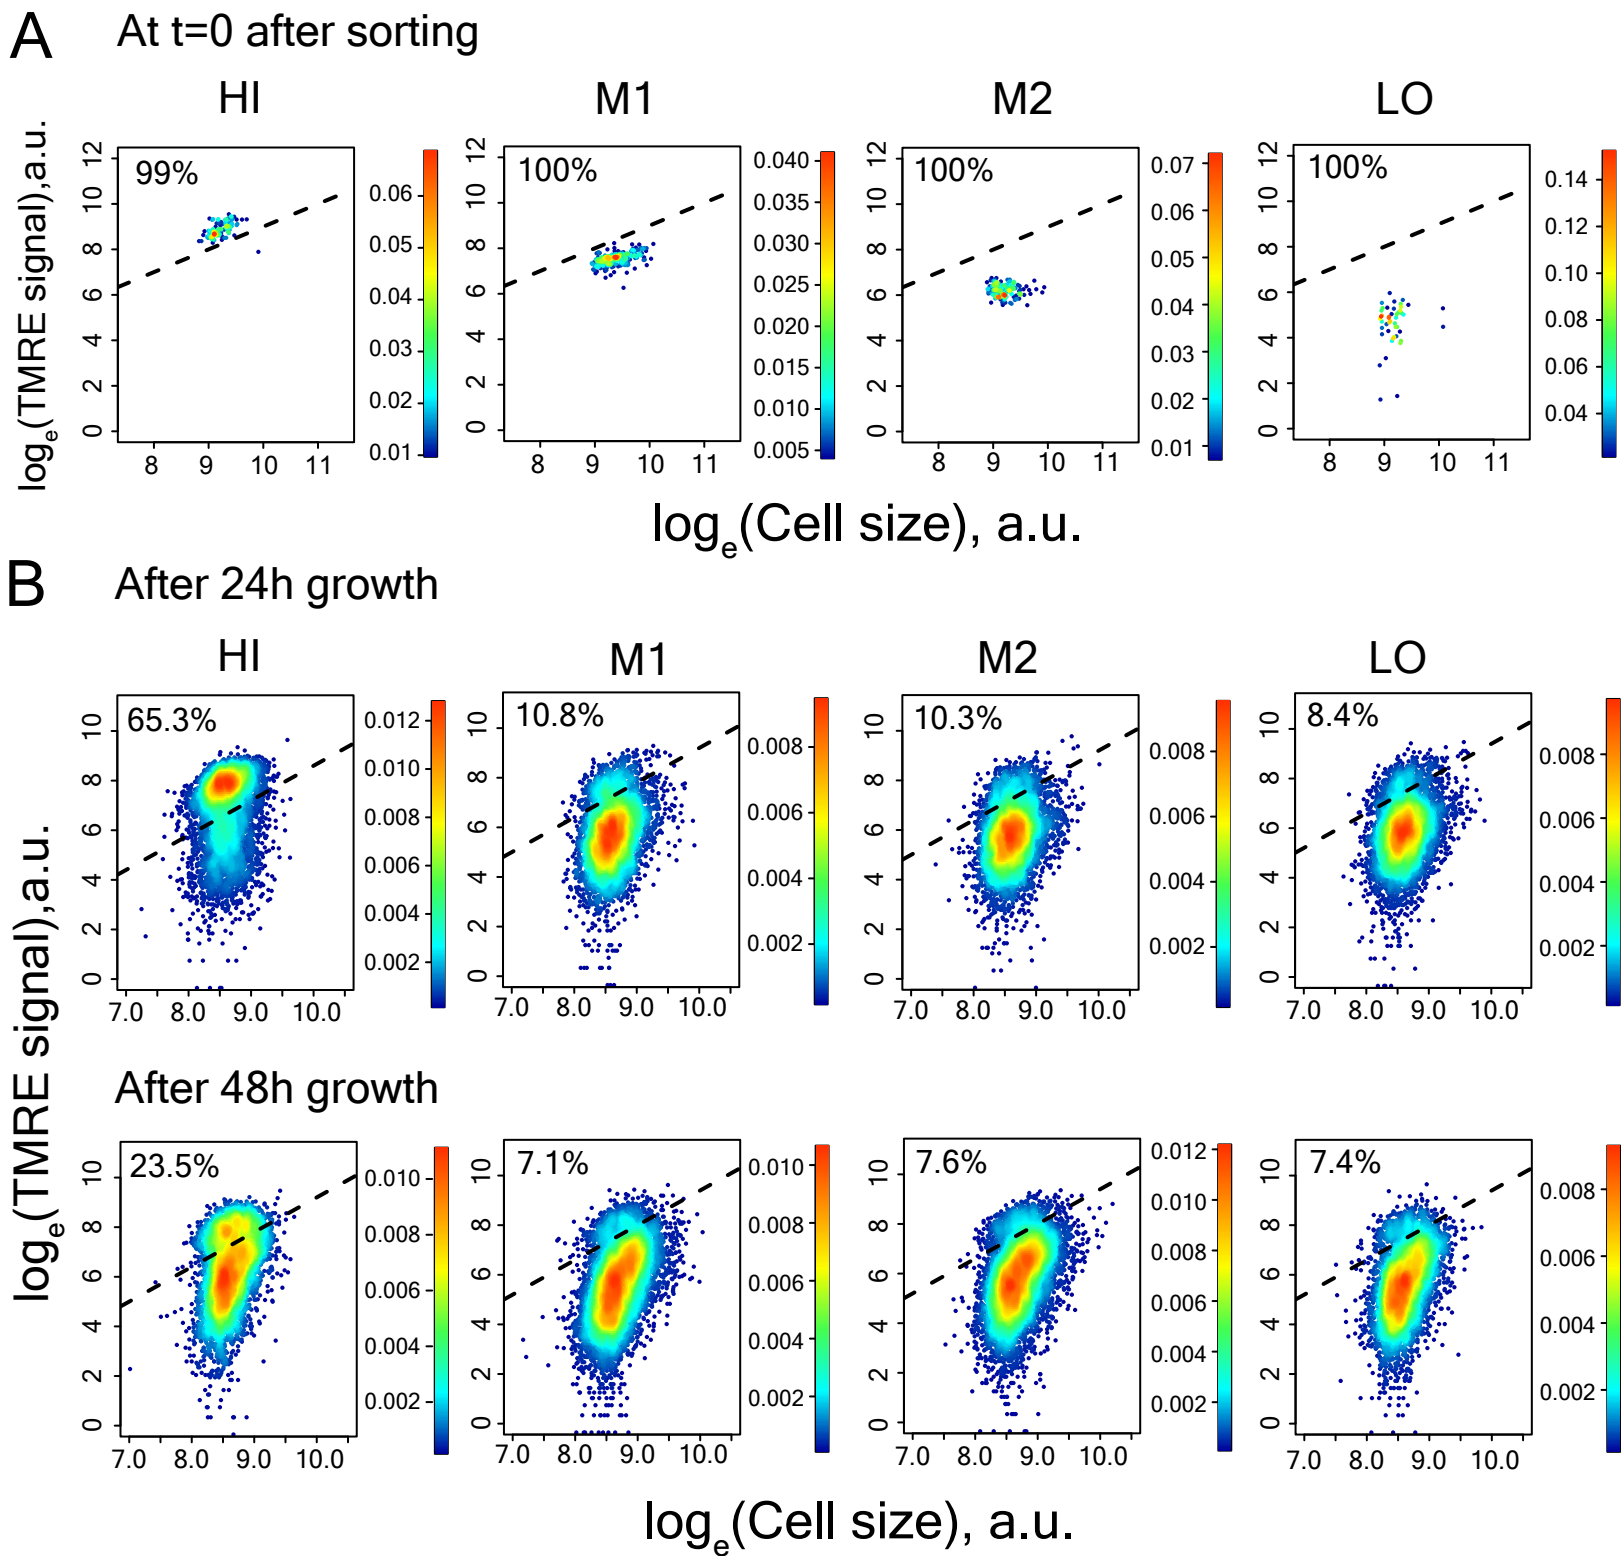

Supplement: supp [file elife-38904-supp-v1.zip › elife_poa_e38904_Figure_5_figure_supplement_10.pdf]

Figure 5 - figure supplement 2

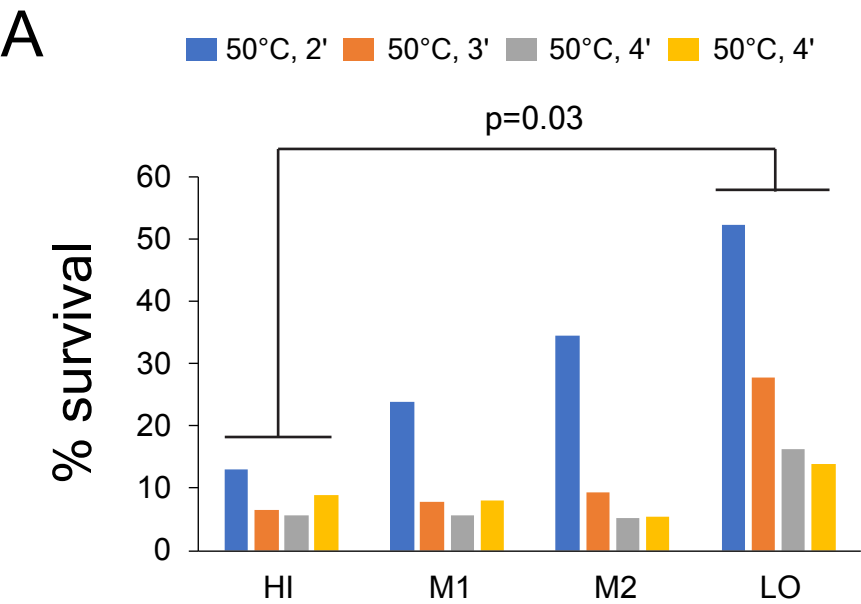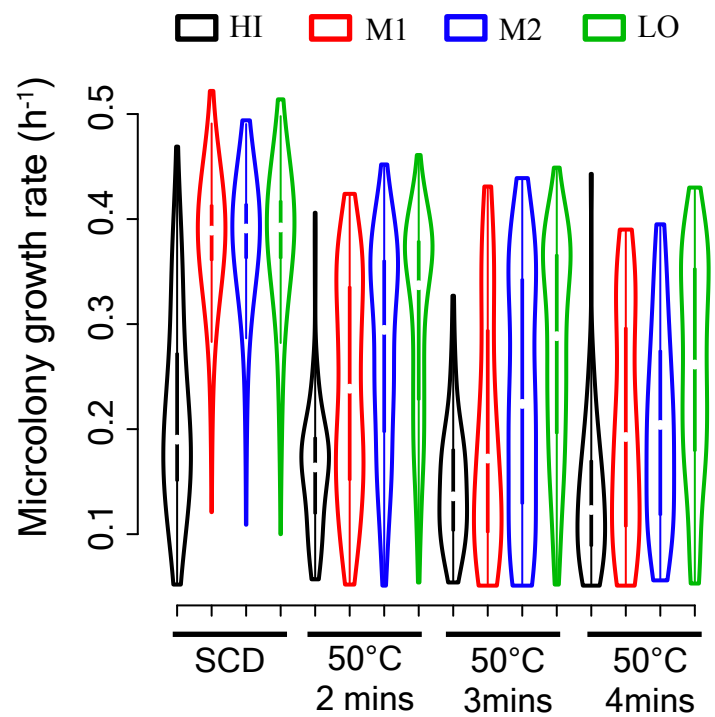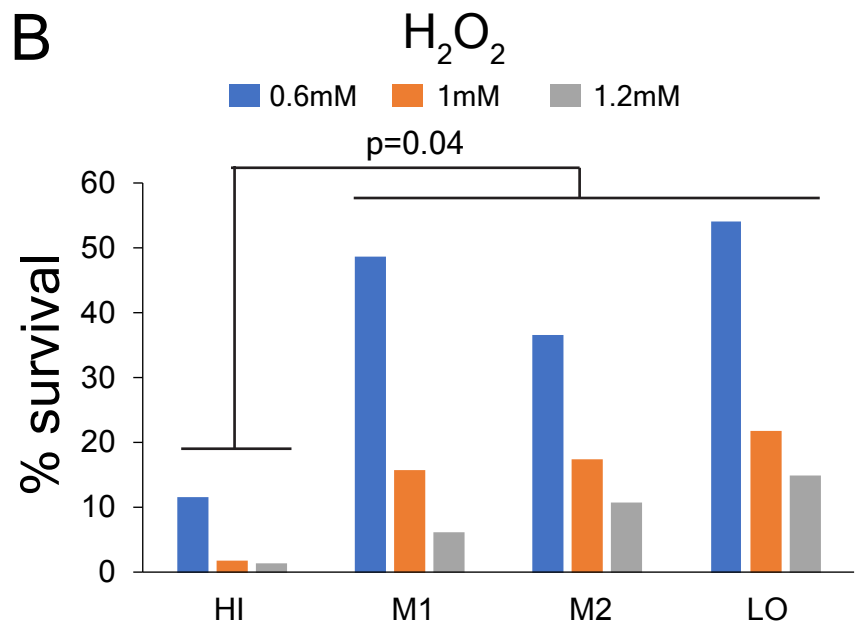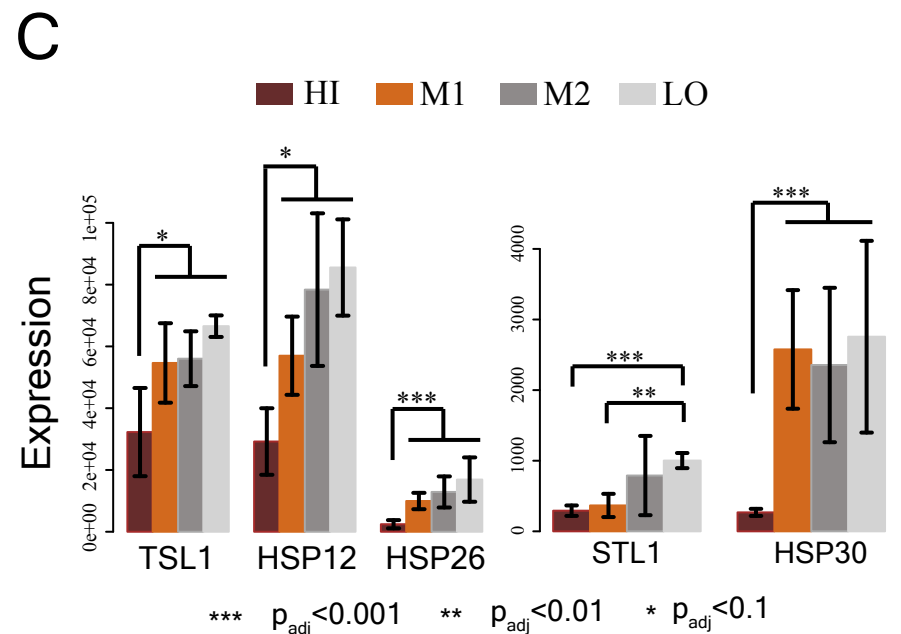

Supplement: supp [file elife-38904-supp-v1.zip › elife_poa_e38904_Figure_5_figure_supplement_2.pdf]

Figure 5 - figure supplement 7

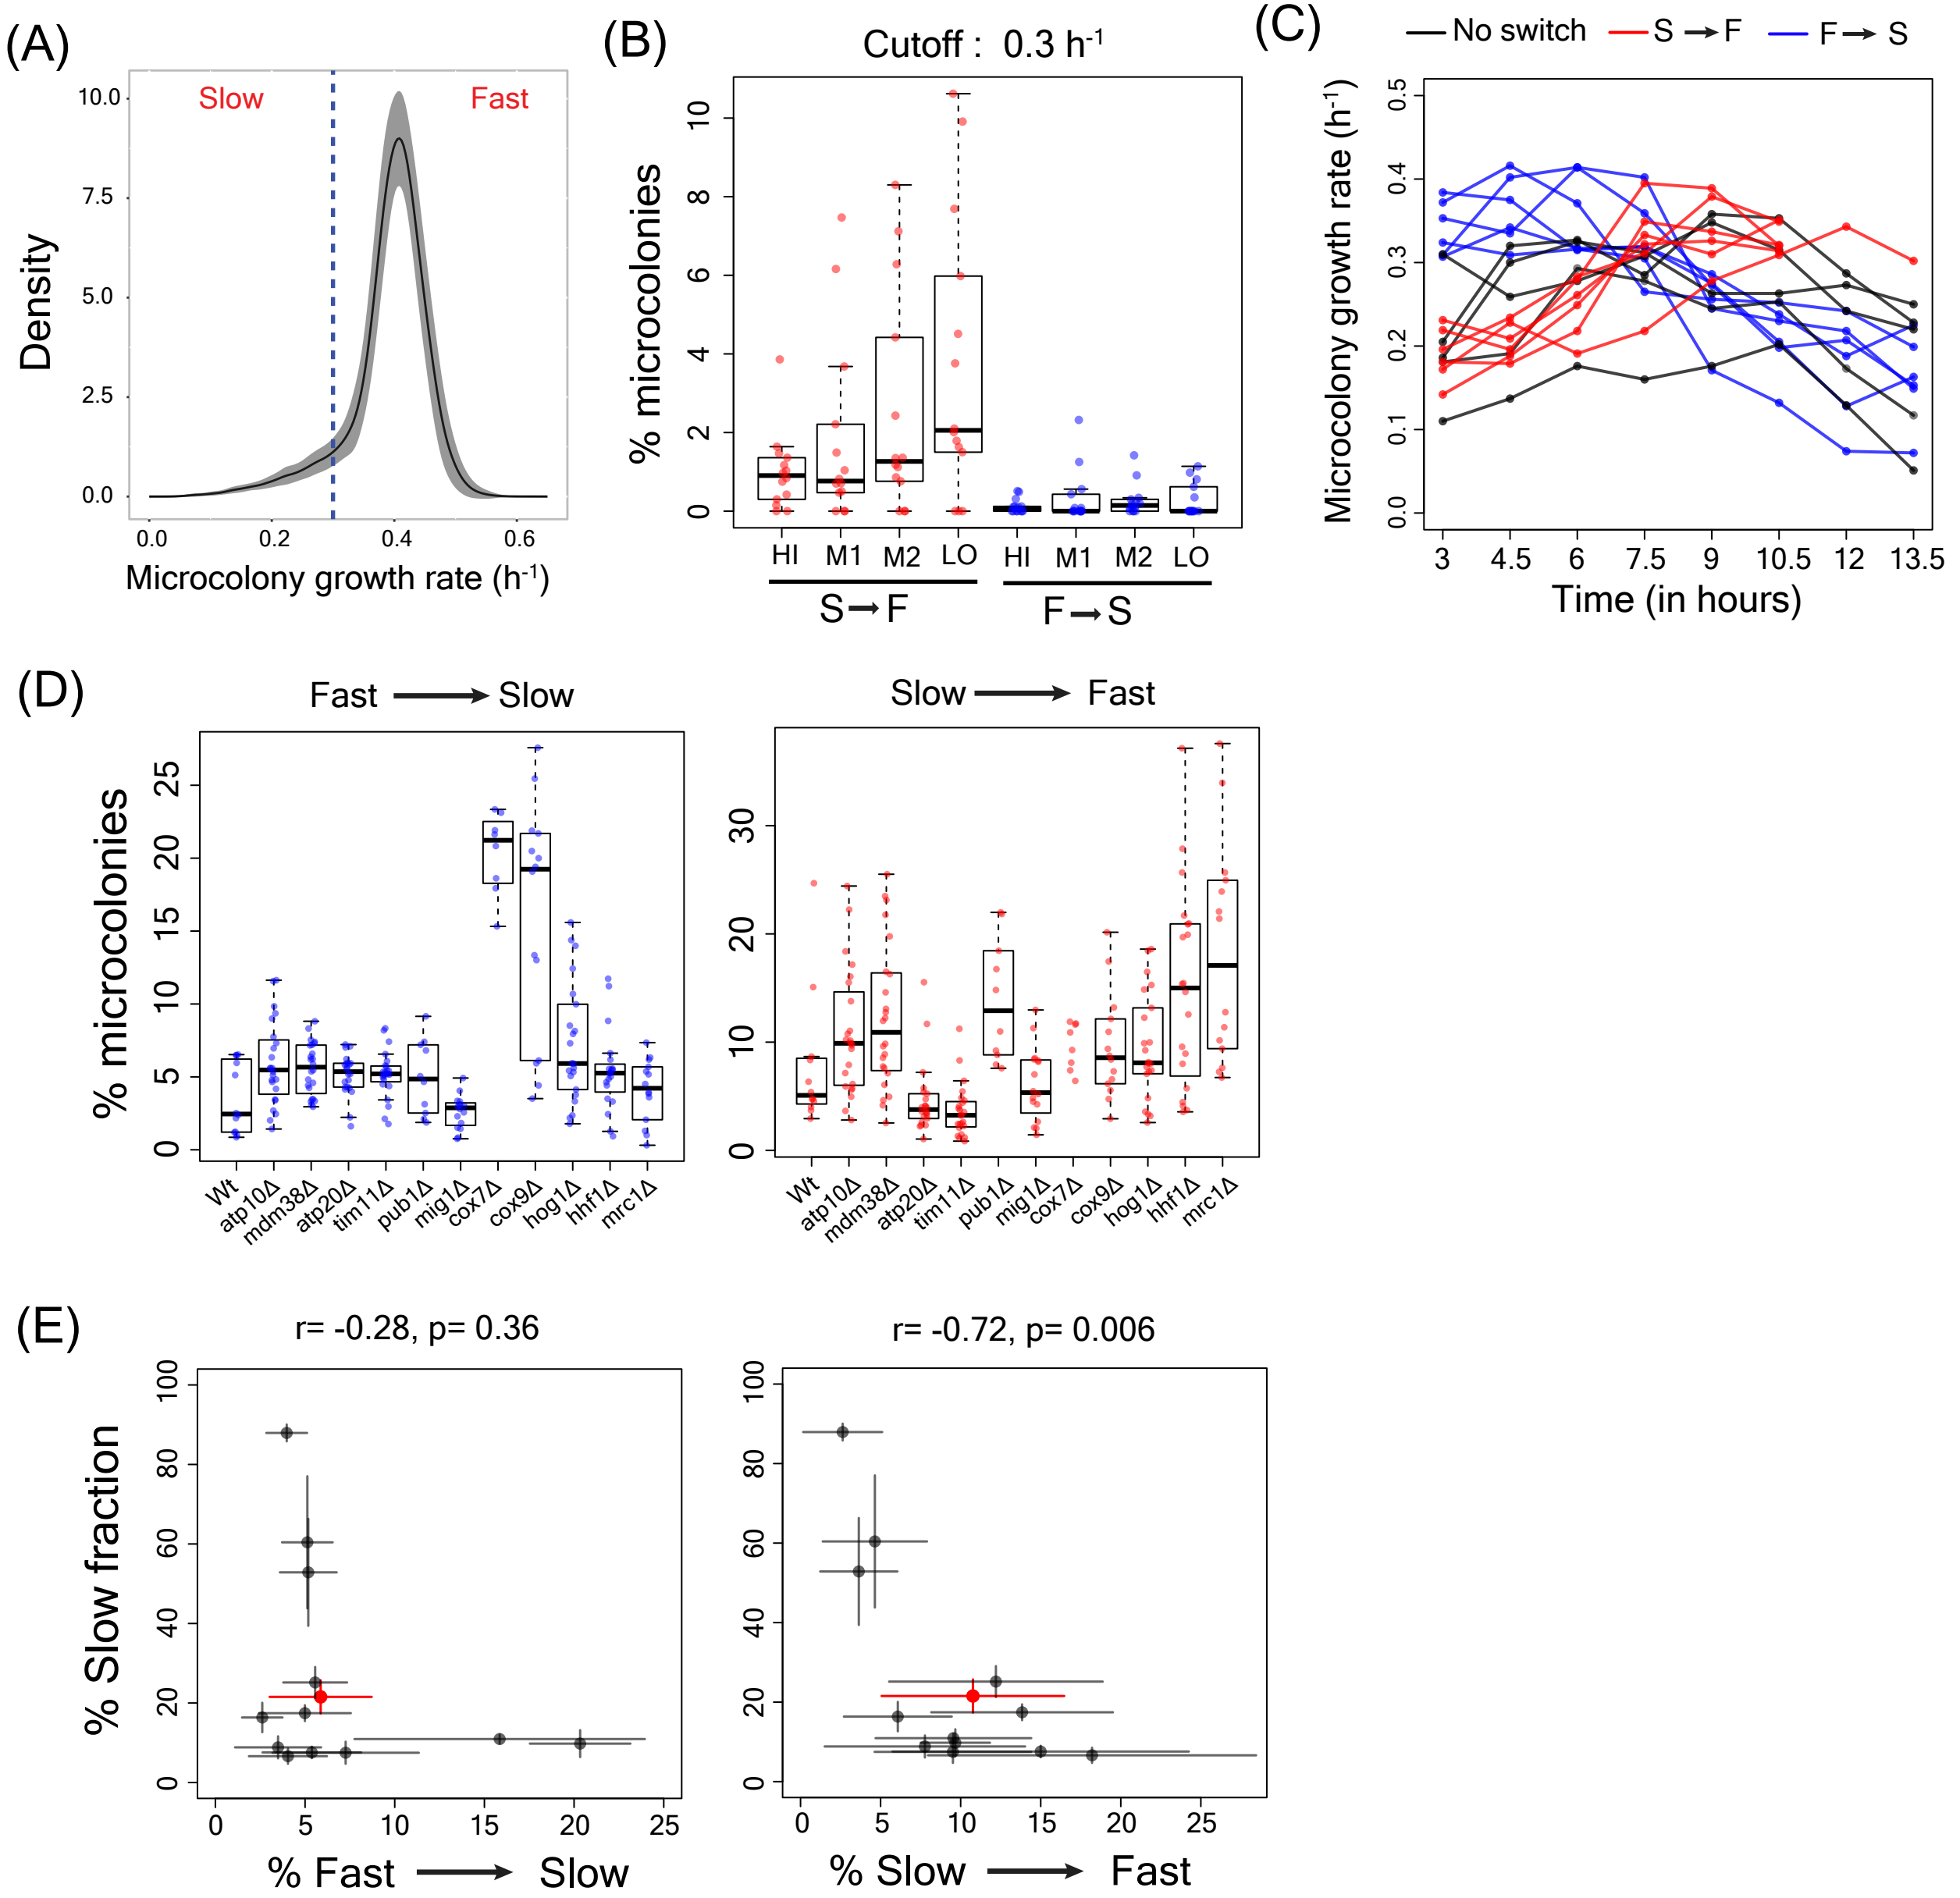

Supplement: supp [file elife-38904-supp-v1.zip › elife_poa_e38904_Figure_5_figure_supplement_7.pdf]

Figure 5 - figure supplement 3

A

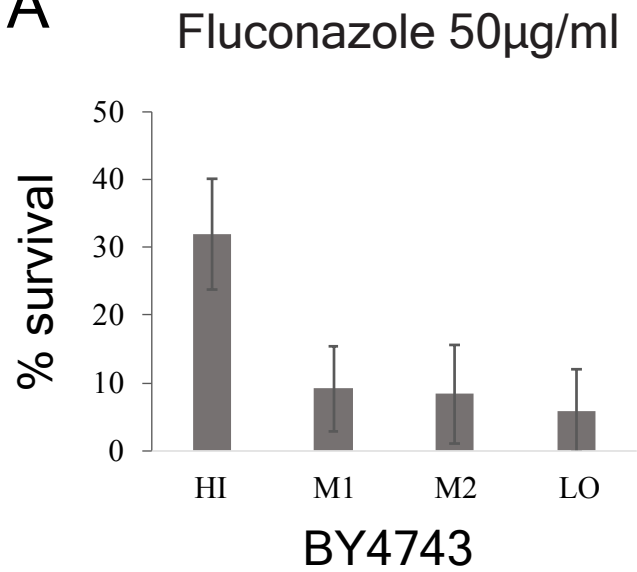

B

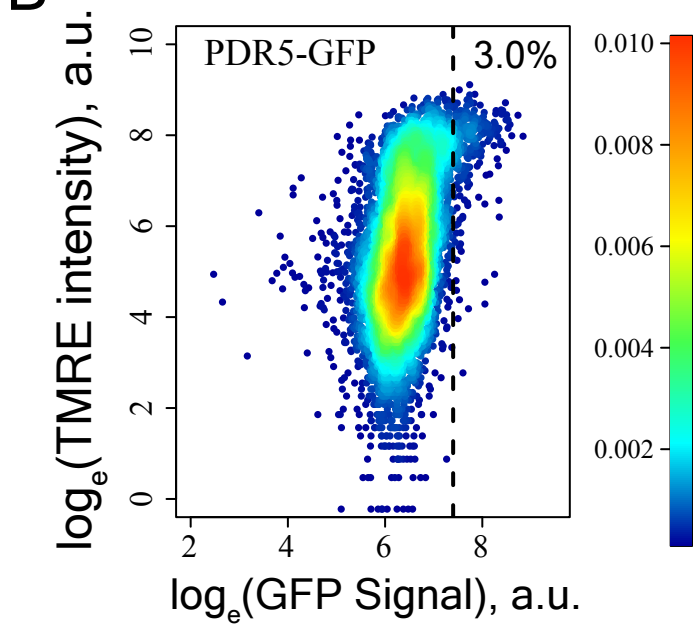

C

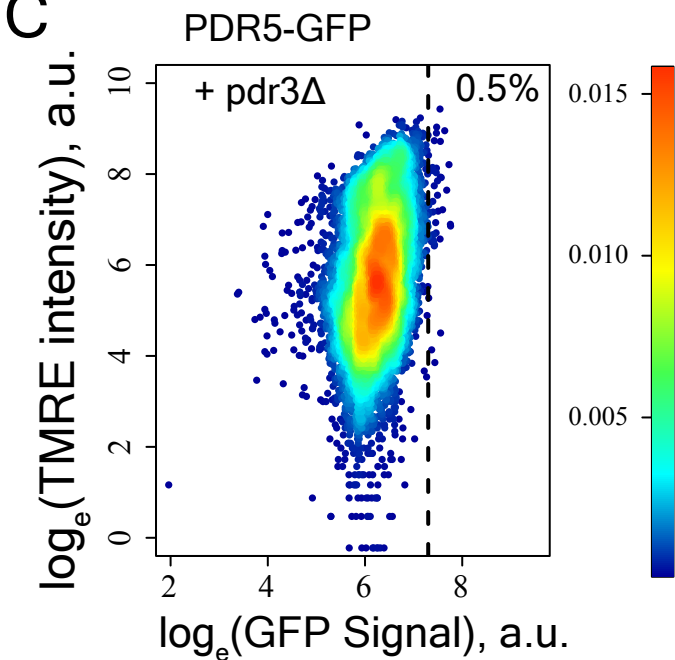

D

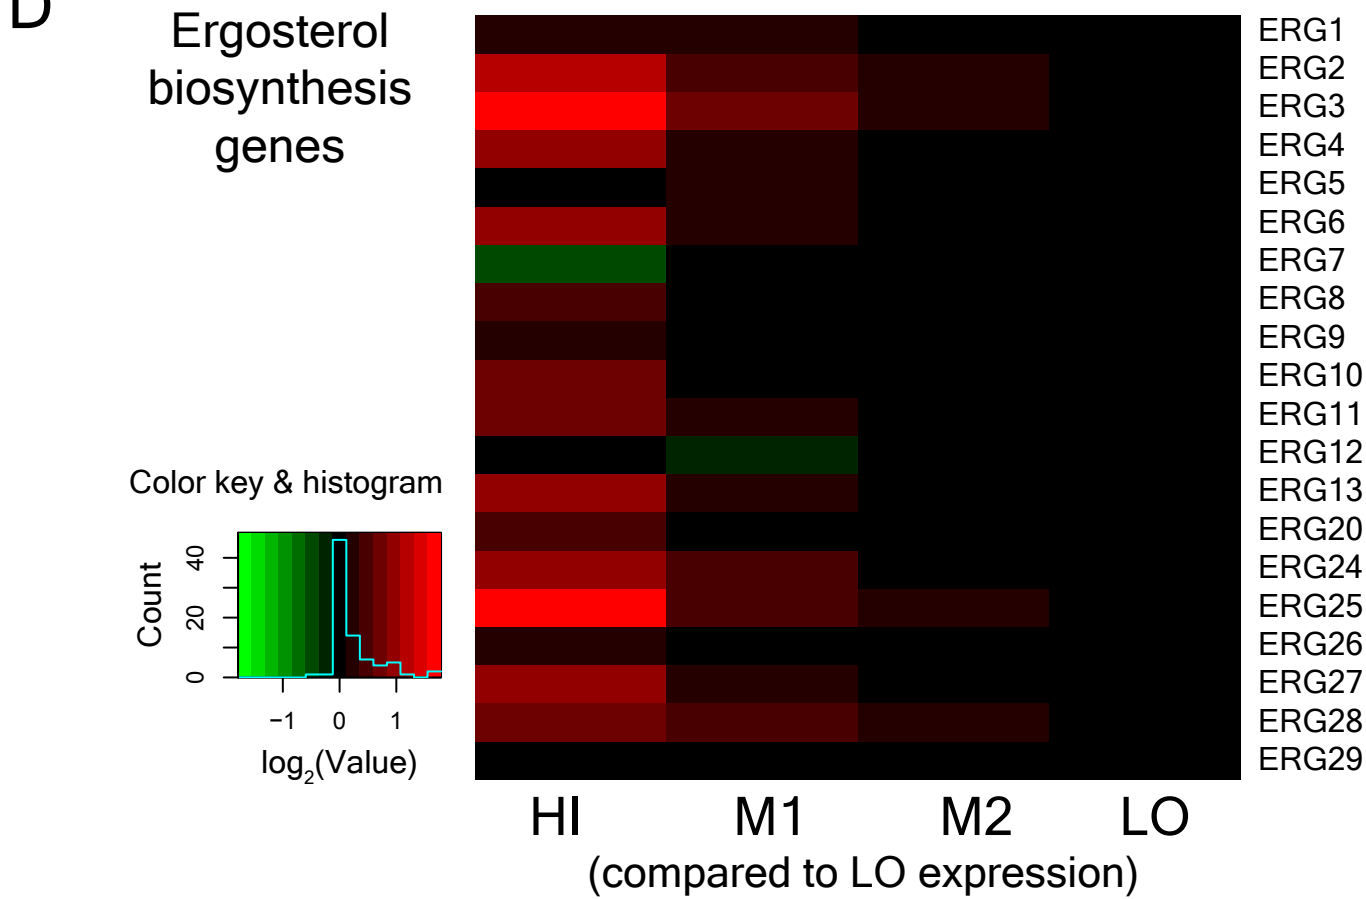

Supplement: supp [file elife-38904-supp-v1.zip › elife_poa_e38904_Figure_5_figure_supplement_3.pdf]

Figure 5 - figure supplement 5

A

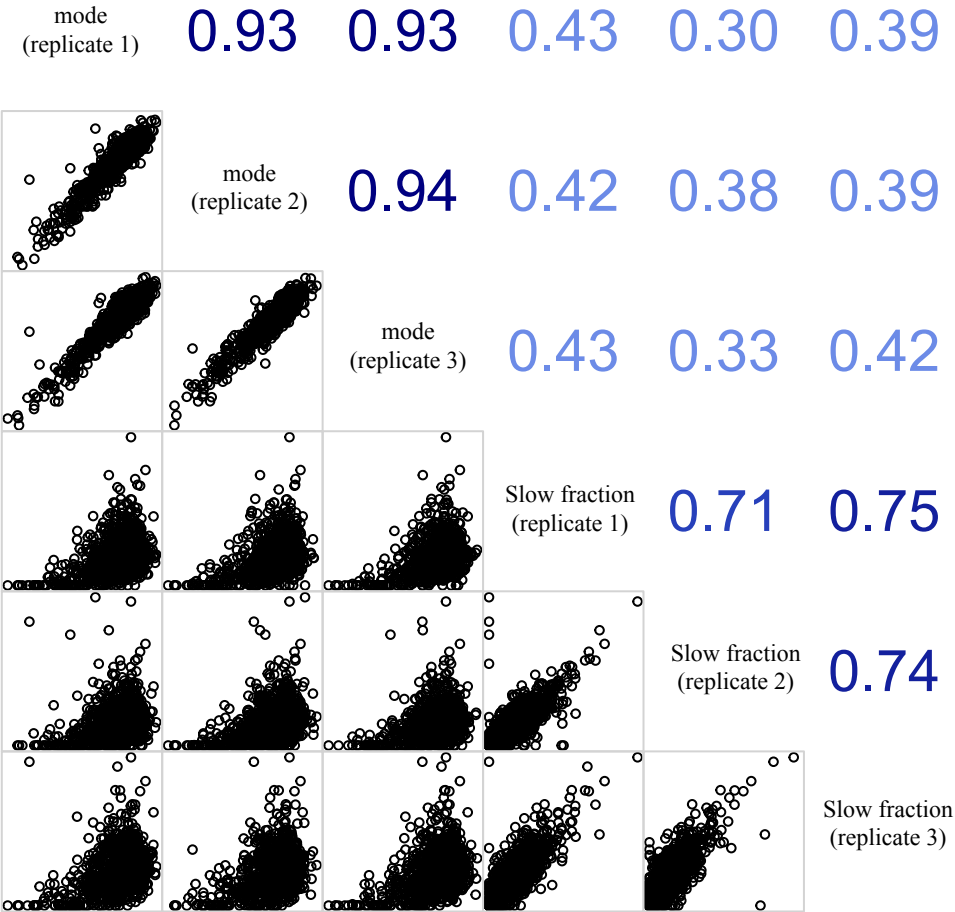

B

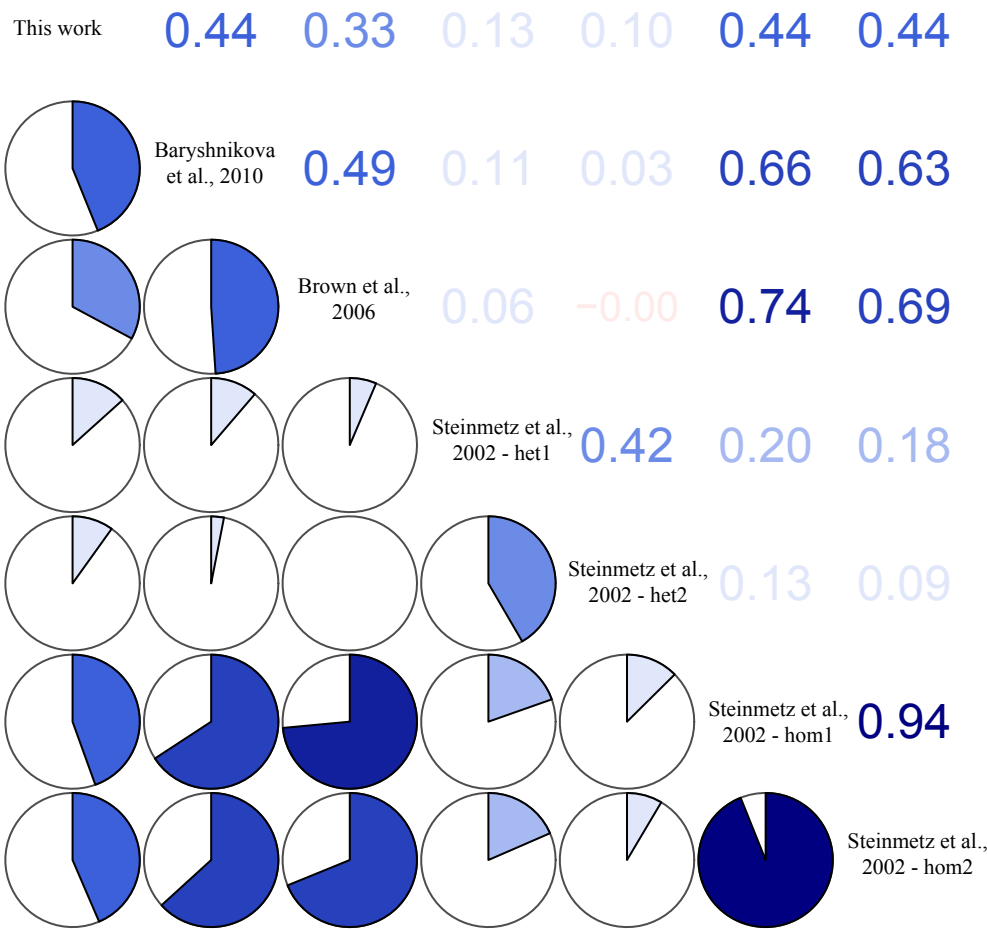

Supplement: supp [file elife-38904-supp-v1.zip › elife_poa_e38904_Figure_5_figure_supplement_5.pdf]

Figure 5 - figure supplement 8

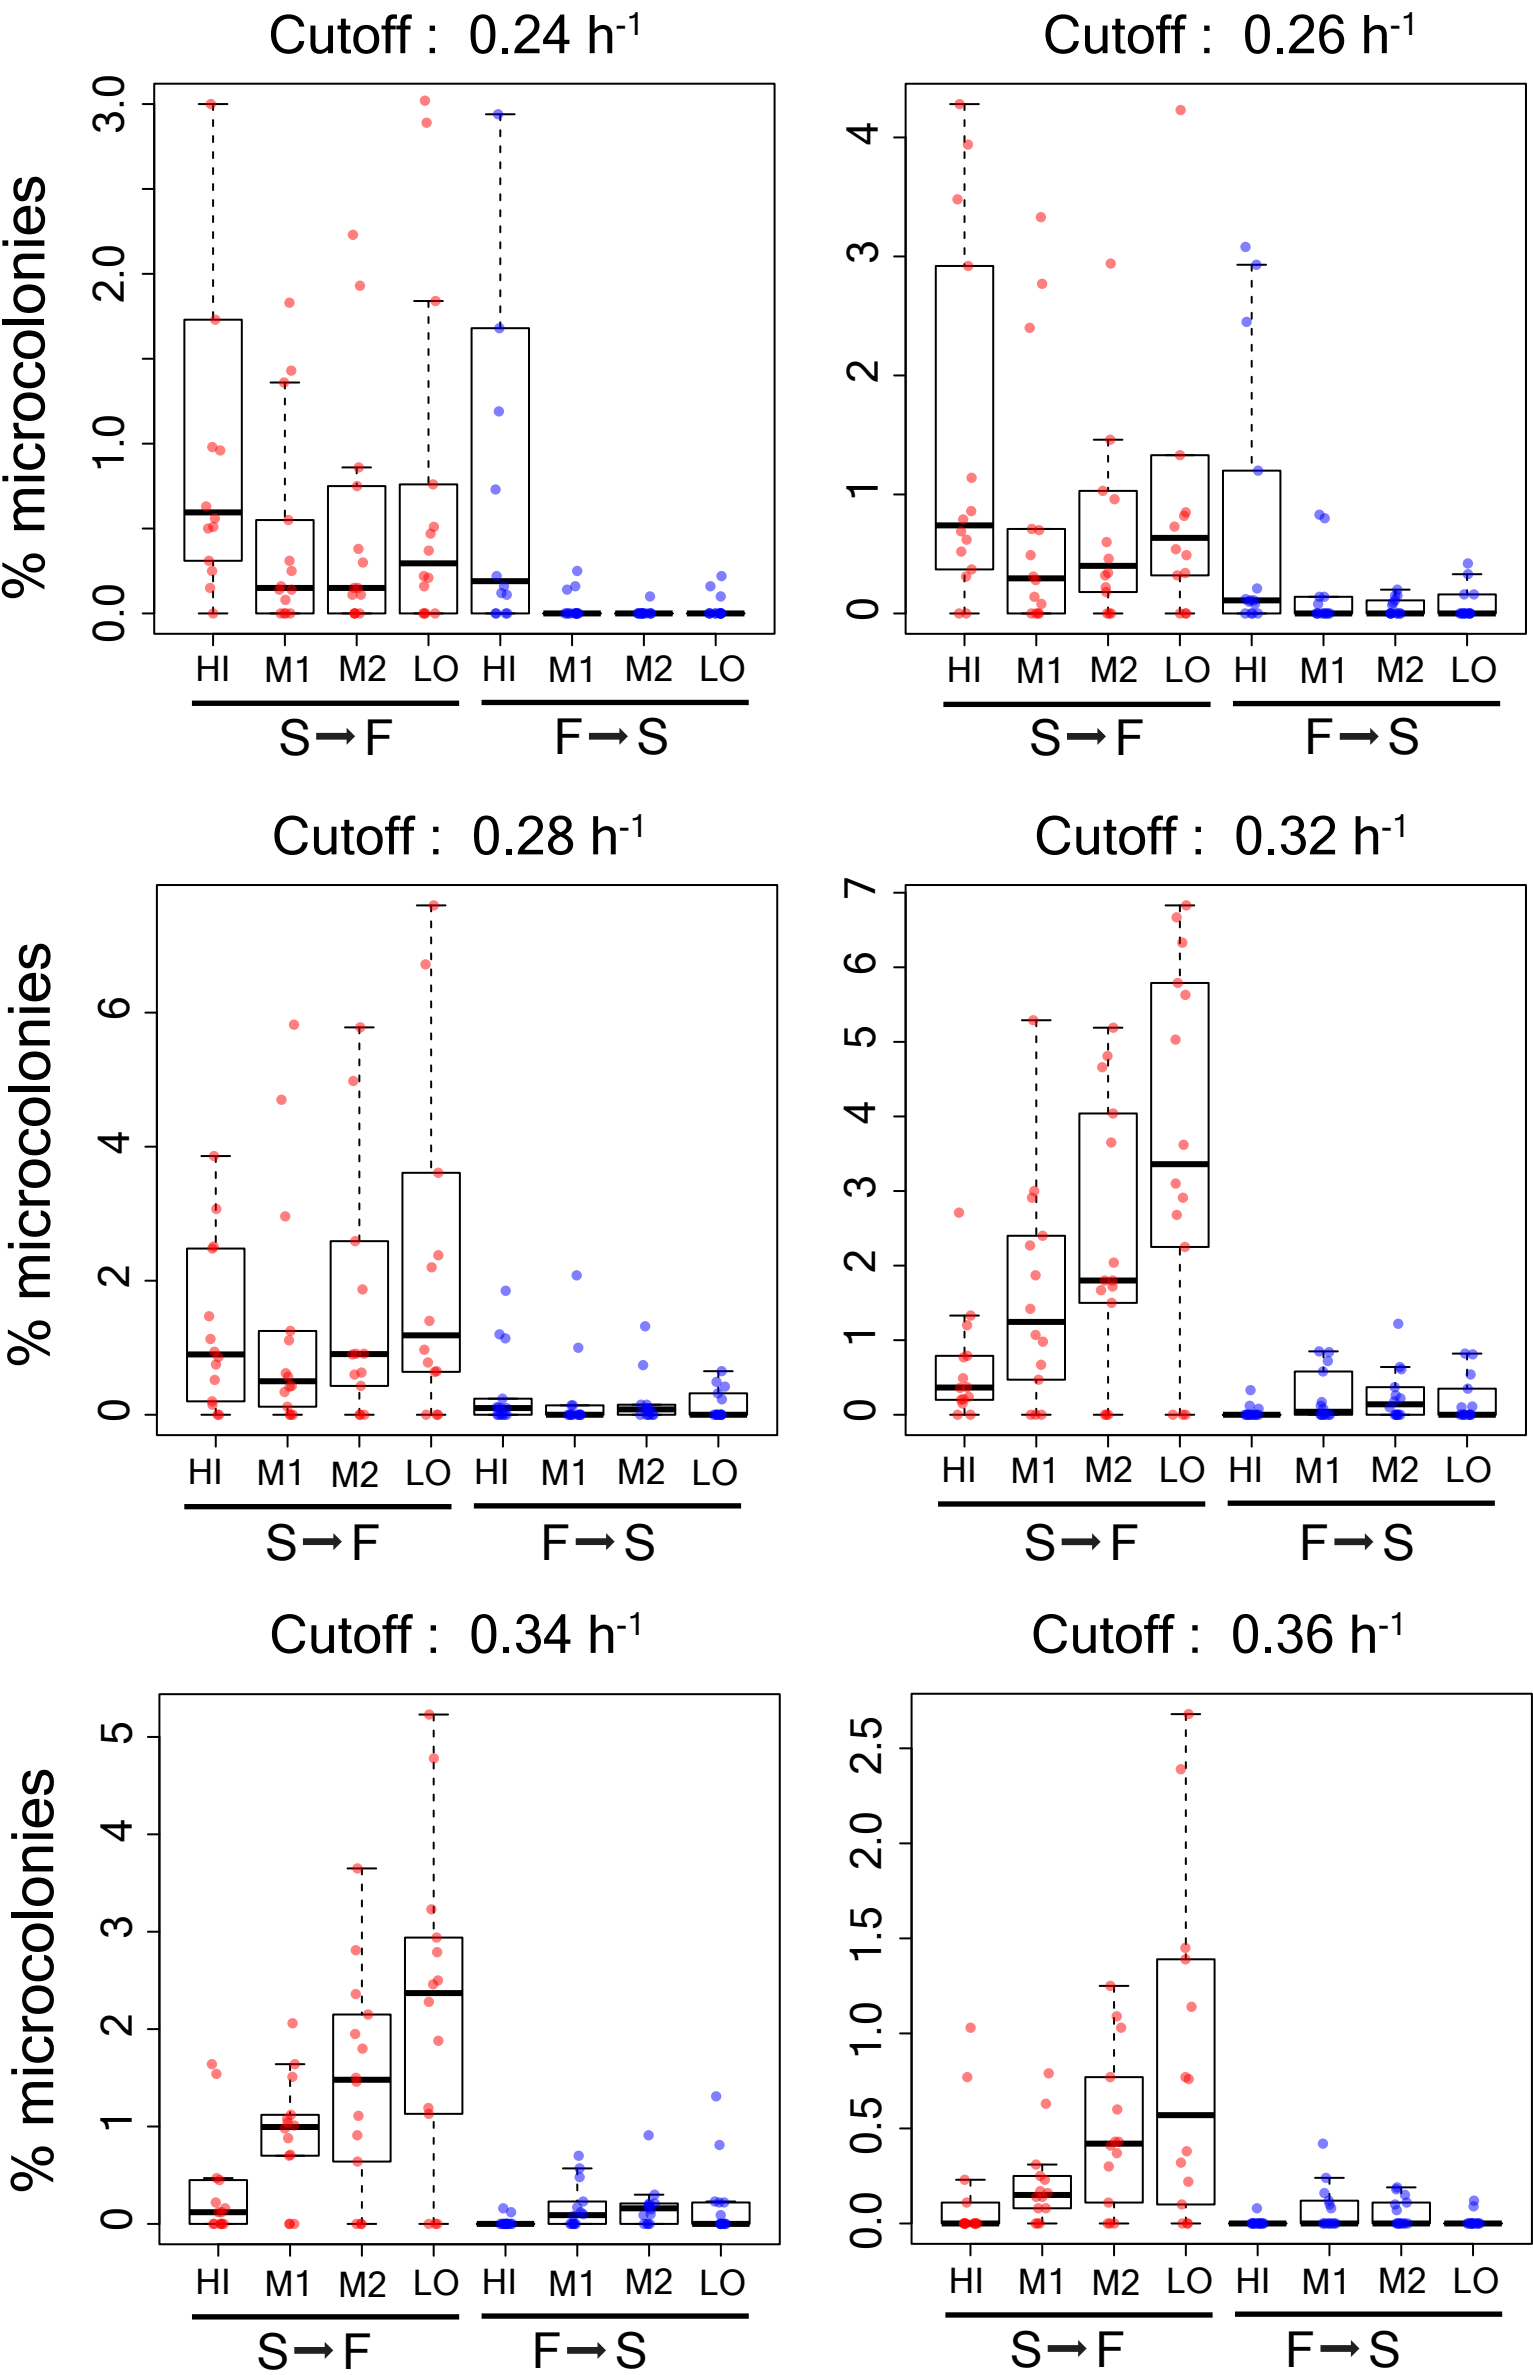

Supplement: supp [file elife-38904-supp-v1.zip › elife_poa_e38904_Figure_5_figure_supplement_8.pdf]
